# Supplementary material for: circ01592 regulates unsaturated fatty acid metabolism through adsorbing miR-218 in bovine mammary epithelial cells
Source: Royal Society of Chemistry journal article supplement (doi:10.1039/d1fo02797b), 2021-01-01
Supplement: d1fo02797b1.pdf [file d1fo02797b1.pdf]

**Table S1**

| Gene   | Primer sequence (5' to 3') | Size(bp) |
|--------|----------------------------|----------|
| GPAM   | GCAGGTTTATCCAGTATGGCATT    | 63       |
|        | GGACTGATATCTTCCTGATCATCTTG |          |
| AGPAT6 | AAGCAAGTTGCCCATCCTCA       | 101      |
|        | AAACTGTGGCTCCAATTTCTGA     |          |
| FASN   | GGGCTCCACCACCGTGTTC        | 226      |
|        | GCTCTGCTGGGCCTGCAGCTG      |          |
| DGAT1  | CCACTGGGACCTGAGGTGTC       | 111      |
|        | GCATCACCACACACCAATTCA      |          |
| DGAT2  | CATGTACACATTCTGCACCGATT    | 100      |
|        | TGACCTCCTGCCACCTTTCT       |          |
| ACSL1  | GTGGGCTCCTTTGAAGAAGTGT     | 120      |
|        | ATAGATGCCTTTGACCTGTTCAAAT  |          |
| ACACA  | CTCCAACCTCAACCACTACGG      | 171      |
|        | GGGGAATCACAGAAGCAGCC       |          |
| SCD    | CCATCGCCTGTGGAGTCAC        | 256      |
|        | GTCGGATAAATCTAGCGTAGCA     |          |
| ELOVL5 | GGCTCCGCCGCCACCTCCGC       | 200      |
|        | TGTTCCATCCTGTACTIONGCT     |          |
| ATGL   | GGAGCTTATCCAGGCCAATG       | 180      |
|        | TGCGGGCAGATGTCACTCT        |          |
| HSL    | GGGAGCACTACAAACGCAACG      | 118      |
|        | TGAATGATCCGCTCAAACCTCG     |          |
| UXT    | TGTGGCCCTTGGATATGGTT       | 101      |
|        | GGTTGTCGCTGAGCTCTGTG       |          |

**Table S2**

| Primers name            | Primer sequence 5'-3'                                                                |
|-------------------------|--------------------------------------------------------------------------------------|
| Psi-CHECK-circ01592-w   | CCGCTCGAGTCACCGAAGGTATCCCGCAGCAGGACATGGTG<br>CGGGTCAAGCACAACTGCTGCGCGCCGGCGTAAGAAT A |
| Psi-CHECK-circ01592-Mut | CCGCTCGAGTCACCGAAGGTATCCCGCAGCAGGACATGGTG<br>CGGGTCAAACCTGCTGCGCGCCGGCGTAAGAAT A     |
|                         |                                                                                      |
| ELOVL5-up               | ccgctcgagGTTGGCAGCCTCTGAACCACA                                                       |
| ELOVL5-Down             | GCTCTCCGACCCCTGCGCTAGcgccggcgataaa                                                   |
| ELOVL5-overlap          | CGUCUGATTGTTTTTTTTTCTGAGTTGTGCC                                                      |

**Table S3**

| Primers name      | Primer sequence 5'-3'        |
|-------------------|------------------------------|
| pcDNA-circ01592-F | CCCAAGCTTACAGAATGGAATTCGGCAT |
| pcDNA-circ01592-R | GGGGTACCCATGCCTGGCCATATTCACA |

**Table S4**

| id         | baseMean        | baseMean_control_Sample<br>non-lactation | baseMean_case_Sample_peak-<br>lactation | foldChange      | log2Fold<br>Change  | pval            | padj            | up_<br>down |
|------------|-----------------|------------------------------------------|-----------------------------------------|-----------------|---------------------|-----------------|-----------------|-------------|
| AAED1      | 535.39<br>1958  | 744.6992255                              | 326.0846904                             | 0.4378<br>74351 | -<br>1.191411<br>15 | 0.0125<br>70914 | 0.1376<br>84706 | Dow<br>n    |
| ABCA1      | 1065.8<br>70582 | 1511.245734                              | 620.4954298                             | 0.4105<br>85397 | -<br>1.284245<br>78 | 0.0060<br>55305 | 0.0845<br>44621 | Dow<br>n    |
| ABCA1<br>0 | 394.94<br>33702 | 581.6023134                              | 208.2844269                             | 0.3581<br>2173  | -<br>1.481478<br>03 | 0.0018<br>23231 | 0.0374<br>16686 | Dow<br>n    |
| ABCA6      | 832.65<br>82541 | 1281.951271                              | 383.365237                              | 0.2990<br>48213 | -1.74155            | 0.0005<br>1976  | 0.0159<br>02786 | Dow<br>n    |
| ABCA9      | 572.57<br>33339 | 819.1904583                              | 325.9562095                             | 0.3979<br>00398 | -<br>1.329520<br>75 | 0.0098<br>41556 | 0.1169<br>51139 | Dow<br>n    |
| ABCB1<br>1 | 22.276<br>24651 | 1.905363956                              | 42.64712905                             | 22.382<br>66811 | 4.484310<br>117     | 0.0024<br>51237 | 0.0458<br>46759 | Up          |
| ABCC1      | 587.68<br>9019  | 860.5923772                              | 314.7856609                             | 0.3657<br>77887 | -<br>1.450960<br>24 | 0.0054<br>35246 | 0.0785<br>17114 | Dow<br>n    |
| ABCC1<br>1 | 133.72<br>49824 | 13.38869661                              | 254.0612681                             | 18.975<br>8029  | 4.246089<br>025     | 8.30E-<br>12    | 9.35E-<br>09    | Up          |
| ABCC6      | 30.123<br>92318 | 14.0424223                               | 46.20542405                             | 3.2904<br>16927 | 1.718270<br>399     | 0.0276<br>87726 | 0.2198<br>11488 | Up          |
| ABCC8      | 83.365<br>61094 | 14.03795771                              | 152.6932642                             | 10.877<br>17083 | 3.443231<br>453     | 0.0017<br>30092 | 0.0366<br>19619 | Up          |
| ABCC9      | 826.16<br>36414 | 1429.033926                              | 223.2933565                             | 0.1562<br>54762 | -<br>2.678027<br>93 | 1.62E-<br>07    | 3.56E-<br>05    | Dow<br>n    |
| ABCG4      | 21.874<br>20844 | 39.61785451                              | 4.130562368                             | 0.1042<br>60123 | -<br>3.261740<br>63 | 0.0173<br>20409 | 0.1680<br>70396 | Dow<br>n    |
| ABHD1      | 151.08          | 85.34231198                              | 216.8351898                             | 2.5407          | 1.345265            | 0.0067          | 0.0903          | Up          |

|            |                 |             |             |                 |                     |                 |                 |          |
|------------|-----------------|-------------|-------------|-----------------|---------------------|-----------------|-----------------|----------|
|            | 87509           |             |             | 70044           | 808                 | 05715           | 39353           |          |
| ABI3BP     | 3420.9<br>01631 | 5975.588906 | 866.2143563 | 0.1449<br>58827 | -<br>2.786284<br>91 | 5.52E-<br>05    | 0.0032<br>55701 | Dow<br>n |
| ABL1       | 2860.4<br>08776 | 4149.479206 | 1571.338347 | 0.3786<br>83268 | -<br>1.400936<br>42 | 0.0491<br>5902  | 0.3030<br>05713 | Dow<br>n |
| ABL2       | 114.20<br>81537 | 176.0129485 | 52.40335895 | 0.2977<br>24454 | -<br>1.747950<br>37 | 0.0017<br>68657 | 0.0367<br>89544 | Dow<br>n |
| ABLIM<br>1 | 4385.4<br>17823 | 5890.097463 | 2880.738183 | 0.4890<br>81582 | -<br>1.031852<br>96 | 0.0145<br>19818 | 0.1511<br>81121 | Dow<br>n |
| ABO        | 574.78<br>91289 | 249.4645581 | 900.1136996 | 3.6081<br>82687 | 1.851272<br>386     | 0.0302<br>26336 | 0.2325<br>17217 | Up       |
| ABTB2      | 168.29<br>94816 | 110.9237735 | 225.6751898 | 2.0345<br>06966 | 1.024679<br>22      | 0.0337<br>39746 | 0.2466<br>0911  | Up       |
| ACAN       | 210.43<br>30751 | 392.6305645 | 28.2355858  | 0.0719<br>13876 | -<br>3.797586<br>02 | 0.0081<br>56838 | 0.1026<br>96151 | Dow<br>n |
| ACAP2      | 72.979<br>65631 | 104.1334473 | 41.82586531 | 0.4016<br>56398 | -<br>1.315966<br>24 | 0.0287<br>59041 | 0.2258<br>52996 | Dow<br>n |
| ACCS       | 313.33<br>44394 | 430.8069389 | 195.8619398 | 0.4546<br>39705 | -<br>1.137204<br>41 | 0.0300<br>77948 | 0.2317<br>64993 | Dow<br>n |
| ACE        | 421.38<br>21496 | 595.4863977 | 247.2779016 | 0.4152<br>53652 | -<br>1.267935<br>24 | 0.0074<br>11634 | 0.0963<br>93992 | Dow<br>n |
| ACER2      | 223.04<br>93083 | 363.1831361 | 82.91548055 | 0.2283<br>02122 | -<br>2.130983<br>83 | 0.0076<br>1559  | 0.0984<br>08046 | Dow<br>n |
| ACER3      | 239.21<br>26913 | 334.6806643 | 143.7447184 | 0.4294<br>98127 | -<br>1.219276<br>26 | 0.0471<br>31877 | 0.2959<br>31755 | Dow<br>n |
| ACHE       | 35.075<br>73949 | 9.674480329 | 60.47699865 | 6.2511<br>88343 | 2.644130<br>47      | 0.0209<br>05787 | 0.1882<br>77331 | Up       |
| ACKR1      | 707.66<br>79238 | 1281.741731 | 133.5941168 | 0.1042<br>28577 | -<br>3.262177<br>21 | 0.0003<br>80713 | 0.0132<br>07078 | Dow<br>n |
| ACKR2      | 99.948<br>21006 | 175.4857765 | 24.41064359 | 0.1391<br>0326  | -<br>2.845771<br>86 | 0.0001<br>76221 | 0.0076<br>04902 | Dow<br>n |
| ACKR3      | 2058.2          | 3961.384588 | 155.0546128 | 0.0391          | -                   | 2.55E-          | 1.31E-          | Dow      |

|            |                 |             |             |                 |                     |                 |                 |          |
|------------|-----------------|-------------|-------------|-----------------|---------------------|-----------------|-----------------|----------|
|            | 196             |             |             | 4152            | 4.675156<br>42      | 09              | 06              | n        |
| ACKR4      | 284.82<br>5156  | 557.0129881 | 12.63732381 | 0.0226<br>87665 | -<br>5.461948<br>09 | 6.24E-<br>05    | 0.0035<br>81988 | Dow<br>n |
| ACOX3      | 1220.6<br>13446 | 650.8206563 | 1790.406236 | 2.7509<br>97865 | 1.459955<br>02      | 0.0211<br>5593  | 0.1887<br>39772 | Up       |
| ACP5       | 2863.6<br>39405 | 527.3967614 | 5199.882048 | 9.8595<br>25936 | 3.301518<br>281     | 0.0047<br>58831 | 0.0720<br>48501 | Up       |
| ACP6       | 465.07<br>22308 | 253.3973609 | 676.7471008 | 2.6706<br>95142 | 1.417215<br>303     | 0.0245<br>38195 | 0.2054<br>03481 | Up       |
| ACSF2      | 1436.4<br>13434 | 950.0333487 | 1922.79352  | 2.0239<br>22131 | 1.017153<br>785     | 0.0120<br>16639 | 0.1333<br>95784 | Up       |
| ACSL4      | 1831.2<br>41723 | 2921.469574 | 741.0138725 | 0.2536<br>4422  | -<br>1.979121<br>81 | 4.94E-<br>05    | 0.0029<br>98571 | Dow<br>n |
| ACSM1      | 484.18<br>02615 | 863.2611045 | 105.0994185 | 0.1217<br>46964 | -<br>3.038042<br>3  | 0.0436<br>34939 | 0.2827<br>32876 | Dow<br>n |
| ACSM3      | 314.20<br>55836 | 18.90640921 | 609.504758  | 32.237<br>99671 | 5.010690<br>191     | 0.0002<br>54537 | 0.0099<br>14059 | Up       |
| ACSM5      | 89.617<br>52566 | 38.10727912 | 141.1277722 | 3.7034<br>33451 | 1.888863<br>413     | 0.0081<br>15519 | 0.1026<br>96151 | Up       |
| ACTA1      | 126.95<br>48734 | 253.9097469 | 0           | 0               | #NAME<br>?          | 0.0306<br>66245 | 0.2347<br>86647 | Dow<br>n |
| ACTA2      | 65155.<br>81035 | 120052.6686 | 10258.95214 | 0.0854<br>53762 | -<br>3.548712<br>19 | 0.0132<br>71286 | 0.1425<br>00436 | Dow<br>n |
| ACTB       | 53808.<br>07008 | 76297.37119 | 31318.76897 | 0.4104<br>82937 | -<br>1.284605<br>84 | 0.0151<br>6157  | 0.1553<br>97476 | Dow<br>n |
| ACTG2      | 71341.<br>05953 | 142548.5022 | 133.6168105 | 0.0009<br>37343 | -<br>10.05913<br>56 | 0.0001<br>15143 | 0.0055<br>84507 | Dow<br>n |
| ACTN1      | 13597.<br>9839  | 21928.76854 | 5267.199272 | 0.2401<br>95853 | -<br>2.057716<br>85 | 0.0498<br>4372  | 0.3049<br>20735 | Dow<br>n |
| ACVR1<br>B | 826.43<br>95308 | 549.8950429 | 1102.984019 | 2.0058<br>08259 | 1.004183<br>701     | 0.0261<br>39349 | 0.2123<br>99872 | Up       |
| ACVRL<br>1 | 1559.0<br>97663 | 2174.714942 | 943.4803851 | 0.4338<br>40945 | -<br>1.204761<br>88 | 0.0072<br>39128 | 0.0949<br>08662 | Dow<br>n |
| ACY1       | 442.48<br>14169 | 289.4483489 | 595.5144849 | 2.0574<br>11926 | 1.040830<br>673     | 0.0177<br>65751 | 0.1710<br>1194  | Up       |



|              |                 |             |             |                 |                     |                 |                 |          |
|--------------|-----------------|-------------|-------------|-----------------|---------------------|-----------------|-----------------|----------|
| ADAM<br>12   | 288.96<br>71778 | 481.416277  | 96.51807852 | 0.2004<br>87776 | -<br>2.318413<br>82 | 0.0411<br>66543 | 0.2738<br>47143 | Dow<br>n |
| ADAM<br>19   | 1461.6<br>81414 | 2447.159495 | 476.2033333 | 0.1945<br>94318 | -<br>2.361458<br>51 | 0.0005<br>17396 | 0.0158<br>7298  | Dow<br>n |
| ADAM<br>22   | 15.454<br>06855 | 27.05034788 | 3.857789227 | 0.1426<br>15143 | -<br>2.809800<br>92 | 0.0100<br>20441 | 0.1184<br>99792 | Dow<br>n |
| ADAM<br>23   | 37.812<br>39511 | 71.16244287 | 4.462347343 | 0.0627<br>06495 | -<br>3.995241<br>32 | 5.64E-<br>06    | 0.0005<br>43791 | Dow<br>n |
| ADAM<br>33   | 3100.1<br>48524 | 5102.040778 | 1098.25627  | 0.2152<br>58231 | -<br>2.215859<br>69 | 0.0084<br>08164 | 0.1050<br>38    | Dow<br>n |
| ADAM<br>TS1  | 3290.9<br>72854 | 5981.378195 | 600.5675135 | 0.1004<br>0621  | -<br>3.316079<br>6  | 0.0273<br>94416 | 0.2184<br>6502  | Dow<br>n |
| ADAM<br>TS12 | 290.44<br>07507 | 521.4652107 | 59.41629074 | 0.1139<br>41044 | -<br>3.133640<br>56 | 5.08E-<br>09    | 2.24E-<br>06    | Dow<br>n |
| ADAM<br>TS14 | 66.354<br>1433  | 119.7096533 | 12.99863327 | 0.1085<br>84671 | -<br>3.203107<br>65 | 3.91E-<br>05    | 0.0025<br>38347 | Dow<br>n |
| ADAM<br>TS15 | 283.40<br>25131 | 478.1211433 | 88.68388297 | 0.1854<br>84127 | -<br>2.430632<br>36 | 1.21E-<br>06    | 0.0001<br>68977 | Dow<br>n |
| ADAM<br>TS16 | 458.85<br>51525 | 913.8525159 | 3.857789227 | 0.0042<br>21457 | -<br>7.888043<br>22 | 0.0066<br>2814  | 0.0896<br>96185 | Dow<br>n |
| ADAM<br>TS17 | 878.32<br>2843  | 1548.600525 | 208.0451609 | 0.1343<br>43982 | -<br>2.895996<br>4  | 0.0336<br>76678 | 0.2462<br>47907 | Dow<br>n |
| ADAM<br>TS2  | 4770.0<br>06348 | 9156.35263  | 383.6600666 | 0.0419<br>00971 | -<br>4.576872<br>51 | 0.0005<br>87767 | 0.0173<br>53087 | Dow<br>n |
| ADAM<br>TS20 | 29.870<br>71619 | 59.74143238 | 0           | 0               | #NAME<br>?          | 0.0343<br>81426 | 0.2489<br>78938 | Dow<br>n |
| ADAM<br>TS3  | 102.99<br>97384 | 142.0165576 | 63.98291917 | 0.4505<br>31405 | -<br>1.150300<br>42 | 0.0114<br>78871 | 0.1294<br>98032 | Dow<br>n |
| ADAM<br>TS4  | 547.86<br>03728 | 967.0061159 | 128.7146298 | 0.1331<br>06324 | -<br>2.909348<br>97 | 1.26E-<br>06    | 0.0001<br>71075 | Dow<br>n |

|              |                 |             |             |                 |                     |                 |                 |          |
|--------------|-----------------|-------------|-------------|-----------------|---------------------|-----------------|-----------------|----------|
| ADAM<br>TS5  | 307.27<br>85406 | 552.8491329 | 61.70794841 | 0.1116<br>18061 | -<br>3.163357<br>6  | 5.06E-<br>09    | 2.24E-<br>06    | Dow<br>n |
| ADAM<br>TS6  | 232.56<br>1475  | 366.2765252 | 98.84642484 | 0.2698<br>68304 | -<br>1.889672<br>55 | 0.0051<br>91086 | 0.0761<br>31711 | Dow<br>n |
| ADAM<br>TS9  | 1045.0<br>22014 | 1513.17487  | 576.8691582 | 0.3812<br>30993 | -<br>1.391262<br>68 | 0.0070<br>24185 | 0.0930<br>31767 | Dow<br>n |
| ADAM<br>TSL1 | 324.90<br>59274 | 575.4641946 | 74.34766027 | 0.1291<br>95979 | -<br>2.952366<br>92 | 0.0344<br>87156 | 0.2493<br>4421  | Dow<br>n |
| ADAM<br>TSL2 | 441.09<br>2365  | 724.0248792 | 158.1598509 | 0.2184<br>45326 | -<br>2.194655<br>86 | 0.0020<br>52151 | 0.0405<br>96787 | Dow<br>n |
| ADAM<br>TSL4 | 3865.3<br>41798 | 6479.427049 | 1251.256548 | 0.1931<br>12221 | -<br>2.372488<br>63 | 0.0342<br>3675  | 0.2485<br>29874 | Dow<br>n |
| ADAM<br>TSL5 | 1642.5<br>46935 | 2401.754086 | 883.3397846 | 0.3677<br>89438 | -<br>1.443048<br>05 | 0.0030<br>50875 | 0.0529<br>18005 | Dow<br>n |
| ADARB<br>1   | 1288.9<br>64322 | 1746.6258   | 831.3028438 | 0.4759<br>47878 | -<br>1.071124<br>5  | 0.0162<br>51684 | 0.1614<br>25488 | Dow<br>n |
| ADCK3        | 1702.4<br>85818 | 982.0492824 | 2422.922354 | 2.4672<br>10554 | 1.302880<br>842     | 0.0106<br>15645 | 0.1228<br>32337 | Up       |
| ADCY3        | 450.61<br>3106  | 604.0606792 | 297.1655329 | 0.4919<br>46493 | -<br>1.023426<br>69 | 0.0373<br>39559 | 0.2616<br>81546 | Dow<br>n |
| ADCY5        | 426.03<br>6351  | 772.6848945 | 79.38780749 | 0.1027<br>42797 | -<br>3.282890<br>84 | 0.0015<br>08028 | 0.0332<br>96592 | Dow<br>n |
| ADIG         | 37.571<br>05897 | 74.20432125 | 0.937796677 | 0.0126<br>38033 | -<br>6.306084<br>23 | 0.0107<br>47075 | 0.1239<br>55553 | Dow<br>n |
| ADIPO<br>Q   | 2338.4<br>93152 | 4587.447829 | 89.5384757  | 0.0195<br>18146 | -<br>5.679040<br>18 | 0.0018<br>6055  | 0.0380<br>36735 | Dow<br>n |
| ADIRF        | 1144.3<br>05808 | 1550.364181 | 738.2474359 | 0.4761<br>76788 | -<br>1.070430<br>8  | 0.0412<br>47013 | 0.2741<br>80238 | Dow<br>n |
| ADM          | 5784.5<br>44814 | 10959.15923 | 609.9303948 | 0.0556<br>54853 | -<br>4.167348<br>7  | 0.0275<br>15411 | 0.2189<br>47782 | Dow<br>n |

|         |             |             |             |             |             |             |             |      |
|---------|-------------|-------------|-------------|-------------|-------------|-------------|-------------|------|
| ADORA2B | 403.356867  | 238.5711805 | 568.1425536 | 2.38143833  | 1.251833189 | 0.028180833 | 0.222279863 | Up   |
| ADRA2A  | 92.72207062 | 161.5919187 | 23.85222257 | 0.147607769 | -2.76015944 | 4.14E-05    | 0.00264502  | Down |
| ADRA2C  | 62.28195267 | 99.56587251 | 24.99803283 | 0.251070293 | -1.99383676 | 0.030901046 | 0.235855412 | Down |
| ADSSL1  | 271.8100972 | 140.0183357 | 403.6018587 | 2.882492901 | 1.527317055 | 0.003286656 | 0.055594325 | Up   |
| AEBP1   | 20270.71793 | 32733.09151 | 7808.34435  | 0.238545887 | -2.06766128 | 0.000349446 | 0.012433254 | Down |
| AFAP1L1 | 228.9088671 | 312.3813554 | 145.4363789 | 0.465573173 | -1.10292016 | 0.024698561 | 0.206076474 | Down |
| AGBL5   | 198.228481  | 130.837107  | 265.6198549 | 2.030156895 | 1.021591226 | 0.034065112 | 0.247843661 | Up   |
| AGO2    | 208.7756212 | 305.3617026 | 112.1895398 | 0.367398855 | -1.44458097 | 0.002017064 | 0.040294379 | Down |
| AGO3    | 46.68288377 | 67.94263731 | 25.42313024 | 0.374185213 | -1.41817555 | 0.04182818  | 0.276084356 | Down |
| AGRN    | 3982.835971 | 2084.016171 | 5881.655772 | 2.822269737 | 1.49685588  | 0.001728514 | 0.036619619 | Up   |
| AGTR1   | 798.2308277 | 1245.51127  | 350.9503856 | 0.281772148 | -1.82739908 | 0.023475781 | 0.20003761  | Down |
| AGTRAP  | 707.1242541 | 446.9356282 | 967.3128801 | 2.164322598 | 1.113915553 | 0.025444891 | 0.208964746 | Up   |
| AIDA    | 249.1152647 | 340.2553306 | 157.9751988 | 0.464284273 | -1.10691968 | 0.031203455 | 0.236404504 | Down |
| AIF1L   | 1272.754081 | 1767.885882 | 777.6222799 | 0.439859998 | -1.18488369 | 0.004066163 | 0.064511448 | Down |
| AIFM3   | 50.66828407 | 9.54834435  | 91.78822379 | 9.612998907 | 3.26498657  | 6.45E-06    | 0.000596575 | Up   |
| AIM1L   | 124.327877  | 35.03744766 | 213.6183063 | 6.09685695  | 2.608065697 | 0.004795652 | 0.072173265 | Up   |
| AK1     | 379.372472  | 609.6035822 | 149.1413618 | 0.244653027 | -2.03119096 | 0.001880761 | 0.038163149 | Down |

|             |                 |             |             |                 |                     |                 |                 |          |
|-------------|-----------------|-------------|-------------|-----------------|---------------------|-----------------|-----------------|----------|
| AK4         | 503.69<br>58951 | 815.9445698 | 191.4472203 | 0.2346<br>3263  | -<br>2.091524<br>43 | 5.86E-<br>05    | 0.0034<br>19145 | Dow<br>n |
| AK5         | 127.44<br>96915 | 176.2360263 | 78.66335677 | 0.4463<br>52306 | -<br>1.163745<br>22 | 0.0167<br>13246 | 0.1642<br>99865 | Dow<br>n |
| AKAP1<br>2  | 2415.3<br>95887 | 4300.883498 | 529.9082751 | 0.1232<br>09167 | -<br>3.020818<br>49 | 1.34E-<br>05    | 0.0010<br>78071 | Dow<br>n |
| AKAP2       | 4048.4<br>77689 | 5941.950292 | 2155.005086 | 0.3626<br>76391 | -<br>1.463245<br>26 | 0.0014<br>14248 | 0.0318<br>49714 | Dow<br>n |
| AKT3        | 1706.7<br>34666 | 2412.948853 | 1000.52048  | 0.4146<br>46369 | -<br>1.270046<br>64 | 0.0085<br>97769 | 0.1069<br>62179 | Dow<br>n |
| ALAD        | 1007.7<br>05432 | 632.9510203 | 1382.459844 | 2.1841<br>498   | 1.127071<br>807     | 0.0098<br>04022 | 0.1166<br>58804 | Up       |
| ALDH1<br>A3 | 899.22<br>47931 | 1295.359529 | 503.0900571 | 0.3883<br>78706 | -<br>1.364463<br>99 | 0.0369<br>33452 | 0.2594<br>40239 | Dow<br>n |
| ALDH1<br>L2 | 593.80<br>39484 | 859.0108612 | 328.5970356 | 0.3825<br>29547 | -<br>1.386356<br>91 | 0.0070<br>52947 | 0.0932<br>75739 | Dow<br>n |
| ALDH2       | 4751.9<br>27761 | 2727.336407 | 6776.519114 | 2.4846<br>6566  | 1.313051<br>734     | 0.0088<br>97564 | 0.1095<br>58474 | Up       |
| ALDH3<br>B1 | 804.65<br>33911 | 1201.52143  | 407.7853519 | 0.3393<br>90827 | -<br>1.558980<br>52 | 0.0024<br>99574 | 0.0462<br>93442 | Dow<br>n |
| ALDH4<br>A1 | 522.88<br>28527 | 705.3673822 | 340.3983232 | 0.4825<br>83022 | -<br>1.051150<br>93 | 0.0483<br>04735 | 0.2999<br>54943 | Dow<br>n |
| ALDOA       | 10660.<br>06027 | 14340.42353 | 6979.697003 | 0.4867<br>14844 | -<br>1.038851<br>32 | 0.0138<br>62538 | 0.1461<br>52148 | Dow<br>n |
| ALOX1<br>2E | 113.37<br>03683 | 13.48477803 | 213.2559586 | 15.814<br>56944 | 3.983182<br>373     | 0.0001<br>31881 | 0.0062<br>18686 | Up       |
| ALOX1<br>5B | 490.79<br>48305 | 139.0604727 | 842.5291883 | 6.0587<br>25184 | 2.599014<br>268     | 0.0002<br>55352 | 0.0099<br>14059 | Up       |
| ALOX5       | 115.44<br>59588 | 76.16364598 | 154.7282717 | 2.0315<br>2396  | 1.022562<br>38      | 0.0453<br>6441  | 0.2892<br>51645 | Up       |
| ALOX5<br>AP | 69.759<br>42045 | 43.49864367 | 96.02019722 | 2.2074<br>29684 | 1.142367<br>482     | 0.0471<br>19321 | 0.2959<br>31755 | Up       |
| ALPK3       | 1140.1<br>68648 | 1906.930822 | 373.4064745 | 0.1958<br>15428 | -<br>2.352433       | 0.0231<br>28972 | 0.1984<br>41893 | Dow<br>n |

|              |                 |             |             |                 |                     |                 |                 |          |
|--------------|-----------------|-------------|-------------|-----------------|---------------------|-----------------|-----------------|----------|
|              |                 |             |             |                 | 66                  |                 |                 |          |
| ANGPT<br>2   | 1182.4<br>16854 | 1896.057339 | 468.7763691 | 0.2472<br>37443 | -<br>2.016030<br>84 | 6.05E-<br>06    | 0.0005<br>77382 | Dow<br>n |
| ANGPT<br>4   | 229.73<br>57606 | 382.9122256 | 76.55929559 | 0.1999<br>39544 | -<br>2.322364<br>26 | 4.53E-<br>05    | 0.0028<br>07956 | Dow<br>n |
| ANGPT<br>L1  | 796.97<br>05073 | 1299.936661 | 294.0043531 | 0.2261<br>68214 | -<br>2.144531<br>91 | 0.0094<br>44332 | 0.1138<br>81218 | Dow<br>n |
| ANGPT<br>L2  | 3380.9<br>36048 | 5476.849856 | 1285.022241 | 0.2346<br>27984 | -<br>2.091553       | 0.0040<br>65936 | 0.0645<br>11448 | Dow<br>n |
| ANGPT<br>L5  | 415.12<br>50119 | 829.9215613 | 0.328462454 | 0.0003<br>95775 | -<br>11.30303<br>08 | 0.0005<br>16736 | 0.0158<br>7298  | Dow<br>n |
| ANK2         | 1497.9<br>4116  | 2625.990993 | 369.8913275 | 0.1408<br>57805 | -<br>2.827688<br>59 | 0.0001<br>30701 | 0.0061<br>88232 | Dow<br>n |
| ANKR<br>D1   | 120.78<br>12721 | 240.2463064 | 1.316237869 | 0.0054<br>78702 | -<br>7.511950<br>21 | 0.0090<br>10952 | 0.1103<br>92717 | Dow<br>n |
| ANKR<br>D33  | 22.354<br>82997 | 36.34618966 | 8.363470266 | 0.2301<br>05833 | -<br>2.119630<br>54 | 0.0367<br>23423 | 0.2585<br>69019 | Dow<br>n |
| ANKR<br>D33B | 68.820<br>83229 | 23.65958683 | 113.9820778 | 4.8175<br>85303 | 2.268310<br>212     | 0.0141<br>07592 | 0.1479<br>57471 | Up       |
| ANKR<br>D50  | 923.76<br>99616 | 1372.529664 | 475.010259  | 0.3460<br>83783 | -<br>1.530806<br>75 | 0.0097<br>34902 | 0.1160<br>66026 | Dow<br>n |
| ANKR<br>D63  | 13.250<br>21785 | 3.345149208 | 23.15528649 | 6.9220<br>48929 | 2.791199<br>139     | 0.0210<br>27552 | 0.1884<br>33187 | Up       |
| ANKR<br>D9   | 34.367<br>87706 | 48.6004548  | 20.13529931 | 0.4143<br>02693 | -<br>1.271242<br>9  | 0.0340<br>46962 | 0.2478<br>43661 | Dow<br>n |
| ANKS6        | 204.08<br>00196 | 317.1329919 | 91.02704727 | 0.2870<br>3115  | -<br>1.800720<br>78 | 0.0028<br>04651 | 0.0501<br>9156  | Dow<br>n |
| ANLN         | 280.84<br>96572 | 505.8274723 | 55.8718421  | 0.1104<br>56322 | -<br>3.178452<br>1  | 0.0342<br>54331 | 0.2485<br>57475 | Dow<br>n |
| ANO1         | 789.65<br>25265 | 456.2150957 | 1123.089957 | 2.4617<br>5536  | 1.299687<br>399     | 0.0027<br>15892 | 0.0488<br>9418  | Up       |
| ANO6         | 2448.2<br>90732 | 3656.027494 | 1240.553971 | 0.3393<br>17462 | -<br>1.559292       | 0.0011<br>76312 | 0.0282<br>54985 | Dow<br>n |

|            |                 |             |             |                 |                     |                 |                 |      |
|------------|-----------------|-------------|-------------|-----------------|---------------------|-----------------|-----------------|------|
|            |                 |             |             |                 | 42                  |                 |                 |      |
| ANO9       | 698.94<br>57078 | 306.878035  | 1091.013381 | 3.5552<br>01925 | 1.829931<br>503     | 0.0036<br>02865 | 0.0591<br>91673 | Up   |
| ANTXR<br>2 | 1849.4<br>42616 | 3094.386211 | 604.4990211 | 0.1953<br>5345  | -<br>2.355841<br>36 | 0.0069<br>39052 | 0.0925<br>69328 | Down |
| ANXA6      | 3590.5<br>78711 | 5021.616379 | 2159.541043 | 0.4300<br>48988 | -<br>1.217427<br>08 | 0.0164<br>56441 | 0.1629<br>29608 | Down |
| AOC3       | 4842.2<br>34663 | 7461.026581 | 2223.442744 | 0.2980<br>07616 | -<br>1.746578<br>89 | 9.18E-<br>05    | 0.0047<br>06864 | Down |
| AOX1       | 6996.8<br>84241 | 11030.67598 | 2963.092506 | 0.2686<br>2293  | -<br>1.896345<br>63 | 0.0020<br>40879 | 0.0404<br>79788 | Down |
| AOX3L<br>1 | 36.708<br>73487 | 7.510016717 | 65.90745302 | 8.7759<br>39589 | 3.133553<br>595     | 0.0376<br>9593  | 0.2623<br>75233 | Up   |
| AP1M2      | 868.57<br>75716 | 409.9764455 | 1327.178698 | 3.2372<br>07191 | 1.694749<br>705     | 0.0123<br>6334  | 0.1362<br>38418 | Up   |
| AP1S2      | 758.94<br>45474 | 1143.952827 | 373.9362684 | 0.3268<br>80847 | -<br>1.613163<br>25 | 0.0055<br>17875 | 0.0792<br>10362 | Down |
| AP3M2      | 134.98<br>60499 | 73.77930954 | 196.1927903 | 2.6591<br>84419 | 1.410983<br>834     | 0.0112<br>62834 | 0.1279<br>47691 | Up   |
| APBA1      | 393.87<br>97084 | 613.8090056 | 173.9504112 | 0.2833<br>95013 | -<br>1.819113<br>72 | 0.0010<br>49478 | 0.0262<br>93809 | Down |
| APOA1      | 712.33<br>03541 | 1064.015433 | 360.6452756 | 0.3389<br>4741  | -<br>1.560866<br>65 | 0.0011<br>83332 | 0.0283<br>35987 | Down |
| APOBR      | 675.50<br>50541 | 424.2056095 | 926.8044987 | 2.1848<br>00196 | 1.127501<br>349     | 0.0271<br>05941 | 0.2170<br>36494 | Up   |
| APOL3      | 682.20<br>00486 | 314.8455552 | 1049.554542 | 3.3335<br>53626 | 1.737060<br>935     | 0.0001<br>65141 | 0.0072<br>83565 | Up   |
| APOLD<br>1 | 1086.4<br>39138 | 1764.024846 | 408.8534307 | 0.2317<br>73057 | -<br>2.109215<br>23 | 1.41E-<br>06    | 0.0001<br>85487 | Down |
| AQP7       | 152.23<br>81336 | 301.2811134 | 3.195153744 | 0.0106<br>05224 | -<br>6.559081<br>07 | 7.98E-<br>18    | 3.60E-<br>14    | Down |
| AQPEP      | 399.83<br>38502 | 638.9263612 | 160.7413392 | 0.2515<br>80384 | -<br>1.990908<br>66 | 0.0397<br>53365 | 0.2693<br>86183 | Down |
| AR         | 56.406          | 103.3324788 | 9.479793182 | 0.0917          | -                   | 0.0201          | 0.1842          | Down |

|               |                 |             |             |                 |                     |                 |                 |          |
|---------------|-----------------|-------------|-------------|-----------------|---------------------|-----------------|-----------------|----------|
|               | 13599           |             |             | 40693           | 3.446294<br>39      | 83586           | 56939           | n        |
| ARAP2         | 442.47<br>08203 | 279.4833742 | 605.4582664 | 2.1663<br>48064 | 1.115265<br>057     | 0.0184<br>74729 | 0.1754<br>02962 | Up       |
| AREG          | 91.454<br>50862 | 8.243655271 | 174.665362  | 21.187<br>85372 | 4.405165<br>548     | 0.0027<br>97112 | 0.0501<br>06364 | Up       |
| ARHG<br>AP11A | 185.82<br>98675 | 257.5140232 | 114.1457117 | 0.4432<br>60178 | -<br>1.173774<br>34 | 0.0229<br>11503 | 0.1972<br>79526 | Dow<br>n |
| ARHG<br>AP23  | 510.49<br>40113 | 714.5258207 | 306.4622018 | 0.4289<br>02907 | -<br>1.221277       | 0.0211<br>05592 | 0.1885<br>305   | Dow<br>n |
| ARHG<br>AP29  | 2113.8<br>76079 | 2891.350903 | 1336.401256 | 0.4622<br>06526 | -<br>1.113390<br>47 | 0.0236<br>44865 | 0.2008<br>14365 | Dow<br>n |
| ARHG<br>AP30  | 592.21<br>06009 | 394.182022  | 790.2391799 | 2.0047<br>57031 | 1.003427<br>398     | 0.0313<br>05736 | 0.2368<br>80945 | Up       |
| ARHG<br>AP31  | 1841.8<br>76541 | 2473.266289 | 1210.486792 | 0.4894<br>28412 | -<br>1.030830<br>24 | 0.0168<br>12116 | 0.1647<br>33163 | Dow<br>n |
| ARHG<br>AP4   | 459.20<br>36733 | 292.7709071 | 625.6364395 | 2.1369<br>48803 | 1.095552<br>344     | 0.0282<br>86699 | 0.2229<br>19947 | Up       |
| ARHG<br>AP44  | 119.57<br>36535 | 182.7399606 | 56.40734652 | 0.3086<br>75488 | -<br>1.695837<br>17 | 0.0028<br>6925  | 0.0509<br>93504 | Dow<br>n |
| ARHG<br>AP6   | 258.55<br>27117 | 419.9538186 | 97.15160486 | 0.2313<br>38782 | -<br>2.111920<br>95 | 0.0165<br>48585 | 0.1633<br>93505 | Dow<br>n |
| ARHG<br>AP9   | 166.01<br>46368 | 87.65782219 | 244.3714515 | 2.7877<br>88304 | 1.479121<br>012     | 0.0039<br>27816 | 0.0631<br>49613 | Up       |
| ARHGE<br>F16  | 1822.6<br>41751 | 587.4676216 | 3057.815881 | 5.2050<br>79853 | 2.379920<br>296     | 7.55E-<br>06    | 0.0006<br>84073 | Up       |
| ARHGE<br>F19  | 430.57<br>16937 | 212.2835787 | 648.8598088 | 3.0565<br>70898 | 1.611914<br>031     | 0.0225<br>29101 | 0.1957<br>44636 | Up       |
| ARHGE<br>F25  | 1623.8<br>67057 | 2428.479949 | 819.2541637 | 0.3373<br>52657 | -<br>1.567670<br>57 | 0.0051<br>67109 | 0.0759<br>65342 | Dow<br>n |
| ARHGE<br>F28  | 856.13<br>07916 | 338.0360522 | 1374.225531 | 4.0653<br>22388 | 2.023369<br>766     | 0.0182<br>4442  | 0.1737<br>65097 | Up       |
| ARHGE<br>F37  | 202.64<br>35241 | 112.1341654 | 293.1528828 | 2.6143<br>04763 | 1.386427<br>334     | 0.0289<br>56683 | 0.2264<br>63509 | Up       |
| ARHGE<br>F39  | 344.26<br>98973 | 220.6932636 | 467.8465309 | 2.1198<br>94931 | 1.083992<br>762     | 0.0181<br>63642 | 0.1731<br>78613 | Up       |
| ARHGE<br>F5   | 854.30<br>86316 | 424.5026407 | 1284.114622 | 3.0249<br>86182 | 1.596928<br>552     | 0.0014<br>88038 | 0.0329<br>76314 | Up       |

|            |                 |             |             |                 |                     |                 |                 |          |
|------------|-----------------|-------------|-------------|-----------------|---------------------|-----------------|-----------------|----------|
| ARID5<br>B | 1207.7<br>68604 | 1636.662314 | 778.8748935 | 0.4758<br>92239 | -<br>1.071293<br>17 | 0.0245<br>80796 | 0.2055<br>69299 | Dow<br>n |
| ARL5A      | 231.89<br>7162  | 318.9705646 | 144.8237593 | 0.4540<br>34871 | -<br>1.139124<br>99 | 0.0335<br>42034 | 0.2456<br>61693 | Dow<br>n |
| ARMC4      | 35.569<br>82728 | 62.6000461  | 8.539608452 | 0.1364<br>1537  | -<br>2.873921<br>89 | 0.0201<br>28599 | 0.1840<br>34362 | Dow<br>n |
| ARRDC<br>3 | 789.17<br>13639 | 1081.606728 | 496.7360002 | 0.4592<br>57499 | -<br>1.122624<br>82 | 0.0277<br>95771 | 0.2203<br>02248 | Dow<br>n |
| ARSE       | 1320.4<br>44341 | 276.4872701 | 2364.401412 | 8.5515<br>74223 | 3.096190<br>024     | 3.93E-<br>08    | 1.11E-<br>05    | Up       |
| ARSJ       | 274.75<br>57953 | 501.418633  | 48.09295767 | 0.0959<br>13782 | -<br>3.382118<br>05 | 0.0168<br>46464 | 0.1649<br>26736 | Dow<br>n |
| ASAP1      | 733.84<br>9322  | 989.5393539 | 478.1592901 | 0.4832<br>14021 | -<br>1.049265<br>78 | 0.0155<br>51476 | 0.1574<br>25965 | Dow<br>n |
| ASB1       | 79.221<br>12213 | 112.15019   | 46.29205429 | 0.4127<br>68398 | -<br>1.276595<br>57 | 0.0343<br>49743 | 0.2489<br>61254 | Dow<br>n |
| ASIC2      | 11.149<br>41971 | 18.95946003 | 3.339379384 | 0.1761<br>32621 | -<br>2.505265<br>97 | 0.0329<br>49409 | 0.2428<br>99216 | Dow<br>n |
| ASIC3      | 445.50<br>96952 | 32.7088748  | 858.3105156 | 26.240<br>90621 | 4.713745<br>638     | 5.22E-<br>07    | 8.88E-<br>05    | Up       |
| ASPH       | 2067.2<br>32249 | 2930.048035 | 1204.416463 | 0.4110<br>569   | -<br>1.282589<br>98 | 0.0083<br>21536 | 0.1043<br>17014 | Dow<br>n |
| ASPHD<br>2 | 206.97<br>0612  | 321.3405029 | 92.60072119 | 0.2881<br>70089 | -<br>1.795007<br>5  | 0.0017<br>44294 | 0.0367<br>06729 | Dow<br>n |
| ASPM       | 124.90<br>07463 | 183.4858958 | 66.31559678 | 0.3614<br>20677 | -<br>1.468249<br>05 | 0.0166<br>48997 | 0.1641<br>99265 | Dow<br>n |
| ASPN       | 6710.5<br>71087 | 12830.64308 | 590.4990927 | 0.0460<br>22564 | -<br>4.441514<br>83 | 0.0013<br>06619 | 0.0302<br>18075 | Dow<br>n |
| ASTN1      | 29.863<br>63615 | 59.72727229 | 0           | 0               | #NAME<br>?          | 0.0074<br>39136 | 0.0966<br>12361 | Dow<br>n |
| ATG4A      | 203.00<br>55334 | 280.2864178 | 125.7246491 | 0.4485<br>57765 | -<br>1.156634       | 0.0114<br>55044 | 0.1293<br>91066 | Dow<br>n |



|              |                 |             |             |                 |                     |                 |                 |      |
|--------------|-----------------|-------------|-------------|-----------------|---------------------|-----------------|-----------------|------|
|              |                 |             |             |                 | 31                  |                 |                 |      |
| ATG9B        | 154.33<br>07491 | 75.78989617 | 232.871602  | 3.0725<br>94287 | 1.619457<br>283     | 0.0162<br>46409 | 0.1614<br>25488 | Up   |
| ATL3         | 1430.5<br>1113  | 1979.315414 | 881.7068465 | 0.4454<br>60506 | -<br>1.166630<br>56 | 0.0092<br>71866 | 0.1121<br>63852 | Down |
| ATOH8        | 175.75<br>66241 | 260.6400531 | 90.87319511 | 0.3486<br>53993 | -<br>1.520132<br>09 | 0.0047<br>929   | 0.0721<br>73265 | Down |
| ATP10B       | 23.932<br>79079 | 3.191091167 | 44.67449041 | 13.999<br>75371 | 3.807329<br>542     | 0.0001<br>63998 | 0.0072<br>50885 | Up   |
| ATP13A<br>3  | 2966.5<br>42181 | 4456.090358 | 1476.994004 | 0.3314<br>55129 | -<br>1.593114<br>52 | 0.0004<br>53357 | 0.0146<br>0376  | Down |
| ATP1B3       | 985.49<br>38197 | 1366.95455  | 604.0330895 | 0.4418<br>8235  | -<br>1.178265<br>79 | 0.0092<br>19698 | 0.1118<br>45413 | Down |
| ATP2B4       | 1127.8<br>9864  | 1804.029671 | 451.767608  | 0.2504<br>21385 | -<br>1.997570<br>33 | 0.0038<br>51495 | 0.0620<br>33142 | Down |
| ATP4A        | 17.021<br>31319 | 3.741047328 | 30.30157905 | 8.0997<br>58275 | 3.017878<br>854     | 0.0409<br>66873 | 0.2732<br>99341 | Up   |
| ATP6V0<br>D2 | 34.354<br>78023 | 2.038327632 | 66.67123283 | 32.708<br>79115 | 5.031606<br>536     | 0.0005<br>64619 | 0.0168<br>6285  | Up   |
| ATP6V1<br>B1 | 52.948<br>82291 | 5.665373151 | 100.2322727 | 17.692<br>08665 | 4.145032<br>308     | 0.0007<br>86902 | 0.0212<br>18118 | Up   |
| ATP6V1<br>C2 | 950.41<br>05449 | 370.5334804 | 1530.287609 | 4.1299<br>57724 | 2.046127<br>014     | 0.0114<br>36114 | 0.1292<br>58182 | Up   |
| ATP7A        | 380.92<br>80609 | 512.7106218 | 249.1455001 | 0.4859<br>37855 | -<br>1.041156<br>27 | 0.0288<br>88289 | 0.2263<br>75259 | Down |
| ATP8A2       | 86.349<br>35035 | 10.38702452 | 162.3116762 | 15.626<br>38809 | 3.965912<br>444     | 0.0009<br>64772 | 0.0248<br>26714 | Up   |
| ATP8B1       | 982.70<br>00177 | 1383.402513 | 581.9975227 | 0.4207<br>00062 | -<br>1.249136<br>06 | 0.0087<br>17828 | 0.1082<br>31864 | Down |
| ATXN1        | 379.11<br>66483 | 515.9906032 | 242.2426934 | 0.4694<br>71134 | -<br>1.090891<br>64 | 0.0217<br>50724 | 0.1913<br>98085 | Down |
| AUNIP        | 16.924<br>78104 | 28.96637432 | 4.883187763 | 0.1685<br>81256 | -<br>2.568483<br>96 | 0.0409<br>50733 | 0.2732<br>92739 | Down |
| AVPI1        | 464.57<br>7257  | 637.3426176 | 291.8118965 | 0.4578<br>57185 | -<br>1.127030       | 0.0209<br>57683 | 0.1884<br>01543 | Down |

|              |                 |             |             |                 |                     |                 |                 |          |
|--------------|-----------------|-------------|-------------|-----------------|---------------------|-----------------|-----------------|----------|
|              |                 |             |             |                 | 43                  |                 |                 |          |
| AXL          | 3912.0<br>00478 | 5362.505618 | 2461.495339 | 0.4590<br>19629 | -<br>1.123372<br>25 | 0.0244<br>14536 | 0.2048<br>43638 | Dow<br>n |
| AZGP1        | 4887.2<br>17484 | 1848.014603 | 7926.420365 | 4.2891<br>54616 | 2.100693<br>323     | 0.0271<br>4042  | 0.2172<br>07645 | Up       |
| B3GAL<br>NT1 | 829.34<br>14134 | 1276.552032 | 382.1307951 | 0.2993<br>4604  | -<br>1.740113<br>91 | 0.0027<br>58871 | 0.0495<br>68998 | Dow<br>n |
| B3GNT<br>2   | 710.35<br>24228 | 957.1595198 | 463.5453257 | 0.4842<br>92656 | -<br>1.046048<br>97 | 0.0389<br>6979  | 0.2660<br>77229 | Dow<br>n |
| B3GNT<br>9   | 436.42<br>84998 | 688.1458589 | 184.7111406 | 0.2684<br>18589 | -<br>1.897443<br>51 | 0.0009<br>46663 | 0.0244<br>65417 | Dow<br>n |
| B4GAL<br>NT1 | 72.378<br>3582  | 102.5100107 | 42.24670573 | 0.4121<br>22733 | -<br>1.278854<br>05 | 0.0381<br>29168 | 0.2629<br>59243 | Dow<br>n |
| B4GAL<br>NT4 | 159.33<br>84049 | 93.80239237 | 224.8744175 | 2.3973<br>20706 | 1.261422<br>921     | 0.0396<br>79938 | 0.2691<br>9383  | Up       |
| B4GAL<br>T3  | 814.87<br>33028 | 506.3796333 | 1123.366972 | 2.2184<br>28425 | 1.149538<br>007     | 0.0111<br>39364 | 0.1268<br>66675 | Up       |
| BAG2         | 1014.4<br>27687 | 1774.510758 | 254.3446166 | 0.1433<br>32248 | -<br>2.802564<br>86 | 0.0305<br>71629 | 0.2343<br>24948 | Dow<br>n |
| BAG3         | 1275.7<br>88607 | 1841.178365 | 710.3988491 | 0.3858<br>39233 | -<br>1.373928<br>25 | 0.0066<br>42099 | 0.0897<br>50428 | Dow<br>n |
| BAI1         | 12.327<br>78579 | 22.63575258 | 2.019818994 | 0.0892<br>3136  | -<br>3.486305<br>36 | 0.0117<br>93708 | 0.1323<br>76681 | Dow<br>n |
| BAIAP2<br>L1 | 470.29<br>17673 | 136.493814  | 804.0897207 | 5.8910<br>34157 | 2.558520<br>918     | 1.46E-<br>06    | 0.0001<br>90871 | Up       |
| BAIAP3       | 30.837<br>63691 | 12.89306335 | 48.78221048 | 3.7836<br>0124  | 1.919760<br>048     | 0.0156<br>85162 | 0.1581<br>00954 | Up       |
| BARD1        | 31.238<br>7541  | 48.52394652 | 13.95356167 | 0.2875<br>60322 | -<br>1.798063<br>47 | 0.0372<br>4487  | 0.2614<br>24207 | Dow<br>n |
| BARX1        | 77.904<br>83808 | 147.8646583 | 7.9450179   | 0.0537<br>31689 | -<br>4.218082<br>99 | 0.0002<br>83719 | 0.0106<br>86944 | Dow<br>n |
| BARX2        | 441.33<br>00492 | 190.187612  | 692.4724865 | 3.6409<br>96799 | 1.864333<br>472     | 0.0046<br>27613 | 0.0703<br>85754 | Up       |
| BBC3         | 146.78          | 67.11457008 | 226.4516586 | 3.3741          | 1.754505            | 0.0009          | 0.0253          | Up       |

|             |                 |             |             |                 |                     |                 |                 |          |
|-------------|-----------------|-------------|-------------|-----------------|---------------------|-----------------|-----------------|----------|
|             | 31143           |             |             | 05776           | 202                 | 98642           | 01271           |          |
| BCHE        | 357.69<br>57279 | 676.8020682 | 38.58938772 | 0.0570<br>17243 | -<br>4.132457<br>92 | 0.0065<br>39838 | 0.0890<br>62785 | Dow<br>n |
| BCKDH<br>A  | 1534.4<br>88207 | 984.9112604 | 2084.065154 | 2.1159<br>92819 | 1.081334<br>731     | 0.0467<br>59283 | 0.2946<br>42218 | Up       |
| BCL11<br>A  | 82.358<br>13289 | 37.61420856 | 127.1020572 | 3.3790<br>96945 | 1.756637<br>741     | 0.0198<br>58279 | 0.1829<br>53774 | Up       |
| BCL2A<br>1  | 73.996<br>97276 | 28.62436889 | 119.3695766 | 4.1702<br>08157 | 2.060119<br>398     | 0.0029<br>70605 | 0.0520<br>76522 | Up       |
| BCL2L<br>14 | 32.855<br>55003 | 6.068098968 | 59.64300109 | 9.8289<br>43365 | 3.297036<br>332     | 0.0022<br>43021 | 0.0433<br>67474 | Up       |
| BDA20       | 65.643<br>90406 | 6.219594305 | 125.0682138 | 20.108<br>74145 | 4.329750<br>885     | 1.16E-<br>08    | 4.56E-<br>06    | Up       |
| BDKRB<br>1  | 79.514<br>44825 | 145.5404434 | 13.48845309 | 0.0926<br>78384 | -<br>3.431623<br>3  | 0.0409<br>35285 | 0.2732<br>90749 | Dow<br>n |
| BEGAI<br>N  | 125.75<br>61838 | 181.3352437 | 70.17712388 | 0.3870<br>02121 | -<br>1.369586<br>62 | 0.0203<br>34637 | 0.1850<br>73924 | Dow<br>n |
| BEST3       | 61.548<br>10422 | 19.20873908 | 103.8874694 | 5.4083<br>44033 | 2.435186<br>927     | 0.0429<br>01254 | 0.2800<br>92554 | Up       |
| BEX2        | 505.74<br>01274 | 217.4611877 | 794.0190671 | 3.6513<br>13944 | 1.868415<br>719     | 0.0030<br>16884 | 0.0525<br>81228 | Up       |
| BEX5        | 63.765<br>77598 | 35.28289192 | 92.24866004 | 2.6145<br>43622 | 1.386559<br>141     | 0.0457<br>70946 | 0.2907<br>83181 | Up       |
| BHLHE<br>40 | 2453.4<br>33786 | 3625.751259 | 1281.116313 | 0.3533<br>3817  | -<br>1.500878<br>49 | 0.0356<br>20365 | 0.2534<br>8453  | Dow<br>n |
| BHLHE<br>41 | 574.47<br>35271 | 327.6230321 | 821.3240221 | 2.5069<br>17835 | 1.325914<br>712     | 0.0325<br>58386 | 0.2424<br>05147 | Up       |
| BHMT2       | 244.38<br>30018 | 21.14055341 | 467.6254501 | 22.119<br>83012 | 4.467268<br>401     | 0.0001<br>61612 | 0.0071<br>9833  | Up       |
| BICD1       | 548.13<br>43576 | 320.7275192 | 775.541196  | 2.4180<br>68764 | 1.273855<br>272     | 0.0309<br>96584 | 0.2360<br>01279 | Up       |
| BIN2        | 414.79<br>77625 | 199.1909257 | 630.4045994 | 3.1648<br>25894 | 1.662126<br>135     | 0.0017<br>46676 | 0.0367<br>06729 | Up       |
| BLNK        | 136.74<br>03579 | 52.6941205  | 220.7865954 | 4.1899<br>66419 | 2.066938<br>681     | 0.0003<br>47284 | 0.0124<br>05248 | Up       |
| BMF         | 913.49<br>63251 | 555.8001978 | 1271.192452 | 2.2871<br>39259 | 1.193544<br>211     | 0.0055<br>88179 | 0.0795<br>62089 | Up       |
| BMP1        | 1915.8<br>08522 | 2774.069109 | 1057.547936 | 0.3812<br>2624  | -<br>1.391280<br>67 | 0.0018<br>00126 | 0.0371<br>11403 | Dow<br>n |

|               |                 |             |             |                 |                     |                 |                 |          |
|---------------|-----------------|-------------|-------------|-----------------|---------------------|-----------------|-----------------|----------|
| BMP2          | 91.789<br>83775 | 132.7244191 | 50.85525643 | 0.3831<br>6428  | -<br>1.383965<br>02 | 0.0040<br>10235 | 0.0641<br>31758 | Dow<br>n |
| BMP4          | 643.76<br>39386 | 1066.163163 | 221.3647142 | 0.2076<br>27427 | -<br>2.267931<br>06 | 0.0008<br>5391  | 0.0225<br>8604  | Dow<br>n |
| BMP5          | 61.384<br>74844 | 106.2710613 | 16.49843555 | 0.1552<br>48619 | -<br>2.687347<br>66 | 9.93E-<br>05    | 0.0049<br>78884 | Dow<br>n |
| BMX           | 125.43<br>91221 | 172.6171426 | 78.26110166 | 0.4533<br>79661 | -<br>1.141208<br>42 | 0.0273<br>53476 | 0.2183<br>3157  | Dow<br>n |
| BNC2          | 893.28<br>61083 | 1628.543679 | 158.0285372 | 0.0970<br>3672  | -<br>3.365325<br>4  | 0.0037<br>83833 | 0.0610<br>52383 | Dow<br>n |
| BNIP2         | 329.09<br>37569 | 500.6031119 | 157.584402  | 0.3147<br>89098 | -<br>1.667542<br>52 | 0.0013<br>34119 | 0.0306<br>96652 | Dow<br>n |
| BOLA-<br>DMA  | 596.18<br>51339 | 387.1376214 | 805.2326465 | 2.0799<br>64855 | 1.056559<br>152     | 0.0223<br>33977 | 0.1946<br>29282 | Up       |
| BOLA-<br>DMB  | 1207.5<br>42454 | 787.5378094 | 1627.547098 | 2.0666<br>27251 | 1.047278<br>199     | 0.0217<br>10834 | 0.1913<br>51941 | Up       |
| BOLA-<br>DOA  | 89.638<br>26992 | 51.33914291 | 127.9373969 | 2.4920<br>04924 | 1.317306<br>919     | 0.0299<br>10086 | 0.2309<br>7091  | Up       |
| BOLA-<br>DRB3 | 2282.2<br>91041 | 1436.542418 | 3128.039664 | 2.1774<br>78106 | 1.122658<br>213     | 0.0103<br>06355 | 0.1208<br>81887 | Up       |
| BPIFA2<br>A   | 7.2544<br>30711 | 14.50886142 | 0           | 0               | #NAME<br>?          | 0.0138<br>27315 | 0.1458<br>66049 | Dow<br>n |
| BRB           | 1089.1<br>28411 | 698.7477563 | 1479.509066 | 2.1173<br>72189 | 1.082274<br>887     | 0.0123<br>11178 | 0.1357<br>4654  | Up       |
| BRI3BP        | 469.96<br>05566 | 292.9523397 | 646.9687736 | 2.2084<br>43784 | 1.143030<br>109     | 0.0458<br>21374 | 0.2907<br>83181 | Up       |
| BRINP1        | 15.454<br>52676 | 4.611914552 | 26.29713898 | 5.7020<br>00477 | 2.511468<br>16      | 0.0211<br>1157  | 0.1885<br>305   | Up       |
| BRINP2        | 25.890<br>43551 | 51.78087102 | 0           | 0               | #NAME<br>?          | 0.0160<br>09964 | 0.1600<br>02074 | Dow<br>n |
| BSP1          | 9.1896<br>65604 | 0.975908839 | 17.40342237 | 17.833<br>04103 | 4.156480<br>838     | 0.0161<br>0713  | 0.1606<br>17201 | Up       |
| BSP5          | 1316.1<br>33293 | 65.13001609 | 2567.13657  | 39.415<br>56788 | 5.300693<br>655     | 0.0007<br>40054 | 0.0205<br>57378 | Up       |
| BSPRY         | 724.79<br>32099 | 296.7530984 | 1152.833321 | 3.8848<br>232   | 1.957848<br>943     | 0.0082<br>11355 | 0.1030<br>79075 | Up       |
| BTBD1<br>0    | 435.72<br>68113 | 636.9471992 | 234.5064234 | 0.3681<br>7247  | -<br>1.441546       | 0.0241<br>91352 | 0.2040<br>14865 | Dow<br>n |

|              |             |             |             |             |             |             |             |      |
|--------------|-------------|-------------|-------------|-------------|-------------|-------------|-------------|------|
|              |             |             |             |             | 34          |             |             |      |
| BTBD19       | 215.6061739 | 322.1917599 | 109.020588  | 0.338371745 | -1.56331899 | 0.001816336 | 0.037339145 | Down |
| BTC          | 279.0587031 | 70.54710213 | 487.570304  | 6.911273309 | 2.788951532 | 0.000430912 | 0.014248211 | Up   |
| BVES         | 198.0395365 | 386.1575698 | 9.921503198 | 0.025692888 | -5.28248712 | 0.001311227 | 0.03028582  | Down |
| C10H14orf37  | 394.9706868 | 57.24914945 | 732.6922241 | 12.79830759 | 3.67788114  | 0.000471799 | 0.01495744  | Up   |
| C10H15orf48  | 707.2856969 | 218.3847497 | 1196.186644 | 5.477427547 | 2.453498496 | 0.000509743 | 0.015774927 | Up   |
| C10H15orf52  | 1385.878836 | 2171.38354  | 600.3741321 | 0.276493821 | -1.85468085 | 0.021776706 | 0.191437624 | Down |
| C10H15orf59  | 121.5910908 | 186.825333  | 56.35684866 | 0.301655283 | -1.72902725 | 0.004319775 | 0.066912591 | Down |
| C11H2orf40   | 99.52310653 | 158.4466329 | 40.5995802  | 0.256235046 | -1.96446029 | 0.001255852 | 0.029534737 | Down |
| C13H20orf194 | 940.7140471 | 1387.43534  | 493.9927543 | 0.356047406 | -1.48985875 | 0.040042426 | 0.270028158 | Down |
| C15H11orf34  | 268.4687102 | 35.01696457 | 501.9204558 | 14.33363691 | 3.841332809 | 7.27E-05    | 0.004002829 | Up   |
| C15H11orf52  | 135.6639625 | 33.58913242 | 237.7387927 | 7.077848563 | 2.823310894 | 9.18E-07    | 0.000140895 | Up   |
| C15H11orf70  | 37.35165767 | 62.43446516 | 12.26885018 | 0.196507652 | -2.3473426  | 0.00242515  | 0.04552267  | Down |
| C16H1orf116  | 463.6474696 | 120.8951596 | 806.3997796 | 6.670240417 | 2.737738762 | 0.001114403 | 0.027362813 | Up   |
| C16H1orf167  | 46.98378206 | 8.414112476 | 85.55345164 | 10.16785215 | 3.345943053 | 0.006108899 | 0.085029651 | Up   |
| C18H19orf84  | 28.68952839 | 45.10210797 | 12.27694881 | 0.272203437 | -1.87724281 | 0.016065303 | 0.16037664  | Down |
| C1GALT1      | 238.4171934 | 324.7726247 | 152.0617621 | 0.468209912 | -1.09477262 | 0.012180965 | 0.134722518 | Down |
| C1H3orf52    | 15.83266978 | 3.741047328 | 27.92429223 | 7.464298037 | 2.900006592 | 0.00711489  | 0.093682841 | Up   |

|             |             |             |             |             |             |             |             |      |
|-------------|-------------|-------------|-------------|-------------|-------------|-------------|-------------|------|
| C1H3orf70   | 53.84541162 | 82.36432796 | 25.32649529 | 0.307493498 | -1.70137219 | 0.013476727 | 0.143765035 | Down |
| C1QL3       | 14.99084444 | 28.38125673 | 1.600432159 | 0.056390461 | -4.14840504 | 0.038262322 | 0.263541059 | Down |
| C1QTNF1     | 3057.543426 | 5736.894974 | 378.1918777 | 0.065922747 | -3.92307982 | 3.96E-11    | 3.47E-08    | Down |
| C1QTNF2     | 205.6026796 | 370.4139255 | 40.79143368 | 0.11012392  | -3.18280022 | 0.024660428 | 0.205948828 | Down |
| C1QTNF3     | 1992.512948 | 3907.170929 | 77.85496776 | 0.019926174 | -5.64919146 | 2.66E-05    | 0.001863858 | Down |
| C1QTNF6     | 515.5366501 | 767.1962713 | 263.8770289 | 0.343949832 | -1.53972994 | 0.011951854 | 0.133156085 | Down |
| C1R         | 6108.863754 | 9253.935984 | 2963.791525 | 0.320273614 | -1.64262315 | 0.007107927 | 0.093659534 | Down |
| C1S         | 9788.918719 | 14005.50791 | 5572.329524 | 0.397867008 | -1.32964182 | 0.035303188 | 0.252610252 | Down |
| C2          | 2619.767596 | 4490.463826 | 749.0713664 | 0.166813807 | -2.58368939 | 0.003520351 | 0.058430708 | Down |
| C23H6orf10  | 34.52400851 | 3.663497568 | 65.38451945 | 17.84756731 | 4.157655538 | 0.012009729 | 0.133395784 | Up   |
| C23H6orf132 | 650.615053  | 268.5591885 | 1032.670917 | 3.845226534 | 1.943068594 | 0.008827701 | 0.109070473 | Up   |
| C25H16orf45 | 85.52588778 | 20.35832864 | 150.6934469 | 7.402053951 | 2.887925651 | 4.04E-05    | 0.002615309 | Up   |
| C25H16orf89 | 43.30519952 | 4.523272101 | 82.08712695 | 18.14773136 | 4.181717303 | 3.82E-05    | 0.002508484 | Up   |
| C25H16orf93 | 173.7012305 | 112.2255702 | 235.1768908 | 2.095573143 | 1.067344878 | 0.031589884 | 0.238150572 | Up   |
| C25H7orf61  | 55.88385654 | 12.16582229 | 99.60189079 | 8.187024964 | 3.033339294 | 1.68E-05    | 0.001289097 | Up   |
| C27H8orf48  | 41.23939678 | 71.30245238 | 11.17634118 | 0.156745537 | -2.67350373 | 0.000954562 | 0.024634265 | Down |
| C28H10orf71 | 39.20087384 | 77.46395101 | 0.937796677 | 0.012106233 | -6.368106   | 0.002595112 | 0.047321709 | Down |

|             |             |             |             |             |             |             |             |      |
|-------------|-------------|-------------|-------------|-------------|-------------|-------------|-------------|------|
|             |             |             |             |             | 11          |             |             |      |
| C28H1orf198 | 417.0604554 | 601.4767534 | 232.6441573 | 0.386788277 | -1.37038402 | 0.004988148 | 0.074364624 | Down |
| C2CD4D      | 10.75823581 | 2.811592211 | 18.70487942 | 6.652771103 | 2.733955397 | 0.045378466 | 0.289251645 | Up   |
| C2H2orf72   | 222.9502789 | 63.13720122 | 382.7633565 | 6.062406143 | 2.599890507 | 2.86E-06    | 0.000325976 | Up   |
| C2H2orf88   | 64.19512048 | 125.8953458 | 2.494895141 | 0.019817215 | -5.65710196 | 0.000415843 | 0.013891475 | Down |
| C3H1orf210  | 758.4212885 | 202.2967993 | 1314.545778 | 6.498104679 | 2.700018984 | 0.03864739  | 0.265079948 | Up   |
| C4BPA       | 126.0711808 | 1.308954073 | 250.8334075 | 191.6288835 | 7.582171219 | 0.006107953 | 0.085029651 | Up   |
| C5AR2       | 349.8008362 | 564.5103663 | 135.0913061 | 0.239307042 | -2.06306524 | 0.000245058 | 0.00973701  | Down |
| C5H12orf75  | 248.6990708 | 435.0341657 | 62.363976   | 0.143354203 | -2.80234389 | 0.01537466  | 0.156602757 | Down |
| C5H22orf23  | 39.82108362 | 17.78943692 | 61.85273032 | 3.476935813 | 1.797816434 | 0.014523914 | 0.151181121 | Up   |
| C6H4orf19   | 697.1387826 | 272.7590937 | 1121.518472 | 4.111754649 | 2.03975418  | 0.003100171 | 0.053464611 | Up   |
| C7H19orf57  | 30.48165623 | 10.12365987 | 50.83965259 | 5.021864943 | 2.32822323  | 0.00352398  | 0.058430708 | Up   |
| C7H5orf45   | 254.6596284 | 146.1092314 | 363.2100254 | 2.485880064 | 1.313756692 | 0.005900689 | 0.082899168 | Up   |
| C8G         | 472.7173589 | 307.4236563 | 638.0110615 | 2.075347972 | 1.053353252 | 0.034073523 | 0.247843661 | Up   |
| C8H9orf152  | 332.1984669 | 92.97906988 | 571.4178639 | 6.145661219 | 2.61956824  | 3.37E-07    | 6.42E-05    | Up   |
| C8H9orf3    | 1946.886835 | 2678.730632 | 1215.043038 | 0.453589108 | -1.1405421  | 0.044869994 | 0.287943731 | Down |
| C9H6orf211  | 525.6614047 | 342.9580403 | 708.3647691 | 2.065456079 | 1.046460382 | 0.012032176 | 0.13348611  | Up   |
| CA12        | 53.3180379  | 17.55356412 | 89.08251167 | 5.074895961 | 2.343378246 | 0.002885626 | 0.051083234 | Up   |
| CA13        | 4.664865566 | 9.329731132 | 0           | 0           | #NAME?      | 0.027915968 | 0.220989441 | Down |
| CA5B        | 182.5008933 | 285.9494649 | 79.05232179 | 0.276455568 | -1.854880   | 0.002108697 | 0.041220089 | Down |

|              |                 |             |             |                 |                     |                 |                 |          |
|--------------|-----------------|-------------|-------------|-----------------|---------------------|-----------------|-----------------|----------|
|              |                 |             |             |                 | 47                  |                 |                 |          |
| CA8          | 867.78<br>74339 | 86.44539221 | 1649.129476 | 19.077<br>12411 | 4.253771<br>795     | 2.34E-<br>15    | 6.02E-<br>12    | Up       |
| CA9          | 120.33<br>1235  | 72.08783259 | 168.5746374 | 2.3384<br>61725 | 1.225559<br>816     | 0.0326<br>03652 | 0.2424<br>30868 | Up       |
| CACNA<br>1A  | 368.04<br>19716 | 590.9369501 | 145.1469931 | 0.2456<br>21793 | -<br>2.025489<br>53 | 0.0011<br>15565 | 0.0273<br>62813 | Dow<br>n |
| CACNA<br>1C  | 1277.7<br>60597 | 2097.589358 | 457.9318357 | 0.2183<br>13386 | -<br>2.195527<br>5  | 0.0327<br>10157 | 0.2425<br>27832 | Dow<br>n |
| CACNA<br>1D  | 140.92<br>35621 | 226.9669363 | 54.8801879  | 0.2417<br>98161 | -<br>2.048124<br>82 | 0.0003<br>26108 | 0.0118<br>60197 | Dow<br>n |
| CACNA<br>1S  | 309.53<br>86796 | 80.34657787 | 538.7307813 | 6.7050<br>86832 | 2.745256<br>015     | 0.0012<br>9771  | 0.0300<br>89198 | Up       |
| CACNA<br>2D1 | 1031.8<br>17254 | 1667.180305 | 396.454202  | 0.2377<br>99235 | -<br>2.072184<br>02 | 0.0057<br>79341 | 0.0816<br>39417 | Dow<br>n |
| CACNA<br>2D2 | 33.299<br>17805 | 11.18778095 | 55.41057516 | 4.9527<br>76193 | 2.308237<br>43      | 0.0034<br>36345 | 0.0574<br>8772  | Up       |
| CACNB<br>2   | 192.76<br>76867 | 330.0153924 | 55.51998108 | 0.1682<br>3452  | -<br>2.571454<br>33 | 0.0072<br>76489 | 0.0951<br>16362 | Dow<br>n |
| CACNG<br>4   | 20.465<br>21106 | 34.25737392 | 6.673048194 | 0.1947<br>91586 | -<br>2.359996<br>73 | 0.0144<br>42971 | 0.1507<br>73585 | Dow<br>n |
| CADM1        | 1428.0<br>78196 | 868.4611873 | 1987.695204 | 2.2887<br>55367 | 1.194563<br>269     | 0.0117<br>27004 | 0.1318<br>02757 | Up       |
| CADM3        | 501.78<br>8558  | 841.465266  | 162.1118499 | 0.1926<br>54238 | -<br>2.375914<br>17 | 1.34E-<br>06    | 0.0001<br>7894  | Dow<br>n |
| CADM4        | 223.24<br>24934 | 132.0778337 | 314.4071531 | 2.3804<br>68731 | 1.251245<br>678     | 0.0125<br>59353 | 0.1376<br>4166  | Up       |
| CALCR<br>L   | 427.43<br>79483 | 653.8191345 | 201.0567622 | 0.3075<br>11285 | -<br>1.701288<br>74 | 0.0005<br>54859 | 0.0165<br>98835 | Dow<br>n |
| CALD1        | 23819.<br>29118 | 40086.70839 | 7551.873972 | 0.1883<br>88478 | -<br>2.408217<br>37 | 0.0105<br>45931 | 0.1225<br>05396 | Dow<br>n |
| CALH<br>M2   | 391.58<br>81815 | 608.4385733 | 174.7377897 | 0.2871<br>90519 | -<br>1.799919<br>97 | 0.0003<br>69038 | 0.0129<br>78894 | Dow<br>n |
| CALM1        | 9263.4          | 12541.59743 | 5985.334032 | 0.4772          | -                   | 0.0105          | 0.1222          | Dow      |



|             |                 |             |             |                 |                     |                 |                 |          |
|-------------|-----------------|-------------|-------------|-----------------|---------------------|-----------------|-----------------|----------|
|             | 65729           |             |             | 38571           | 1.067217<br>45      | 05958           | 69014           | n        |
| CALU        | 6419.2<br>92889 | 10390.06209 | 2448.523686 | 0.2356<br>60159 | -<br>2.085220<br>22 | 2.36E-<br>05    | 0.0016<br>80541 | Dow<br>n |
| CAMK1       | 582.19<br>99934 | 879.0181861 | 285.3818008 | 0.3246<br>59723 | -<br>1.622999<br>68 | 0.0015<br>98584 | 0.0347<br>85104 | Dow<br>n |
| CAMK1<br>D  | 501.67<br>69141 | 745.1044766 | 258.2493516 | 0.3465<br>94819 | -<br>1.528678       | 0.0348<br>82064 | 0.2511<br>25253 | Dow<br>n |
| CAMK2<br>G  | 656.05<br>21302 | 915.2249761 | 396.8792843 | 0.4336<br>4123  | -<br>1.205426<br>16 | 0.0130<br>42271 | 0.1410<br>48873 | Dow<br>n |
| CAMK4       | 79.718<br>07194 | 36.63362305 | 122.8025208 | 3.3521<br>80609 | 1.745099<br>881     | 0.0025<br>87964 | 0.0473<br>21709 | Up       |
| CAMS<br>AP3 | 1203.5<br>91668 | 490.7453719 | 1916.437964 | 3.9051<br>57488 | 1.965380<br>731     | 7.14E-<br>05    | 0.0039<br>67823 | Up       |
| CAP2        | 355.90<br>45021 | 655.6111621 | 56.1978422  | 0.0857<br>18251 | -<br>3.544253<br>77 | 0.0043<br>82582 | 0.0676<br>86127 | Dow<br>n |
| CAPN1<br>4  | 231.89<br>31228 | 1.770697989 | 462.0155477 | 260.92<br>28398 | 8.027479<br>425     | 0.0109<br>76581 | 0.1256<br>3867  | Up       |
| CAPN2       | 4476.1<br>99171 | 6640.527689 | 2311.870653 | 0.3481<br>45624 | -<br>1.522237<br>21 | 0.0015<br>66741 | 0.0342<br>16033 | Dow<br>n |
| CAPN3       | 58.633<br>75866 | 11.95934324 | 105.3081741 | 8.8055<br>14815 | 3.138407<br>354     | 4.99E-<br>06    | 0.0005<br>00664 | Up       |
| CAPN5       | 1322.0<br>59416 | 837.0824846 | 1807.036348 | 2.1587<br>31525 | 1.110183<br>831     | 0.0162<br>51598 | 0.1614<br>25488 | Up       |
| CAPN6       | 487.04<br>35763 | 317.8929956 | 656.194157  | 2.0641<br>98224 | 1.045581<br>519     | 0.0252<br>80905 | 0.2083<br>73556 | Up       |
| CAPSL       | 81.804<br>43971 | 8.481230356 | 155.1276491 | 18.290<br>70106 | 4.193038<br>468     | 1.93E-<br>09    | 1.02E-<br>06    | Up       |
| CASC5       | 128.15<br>78177 | 179.7467504 | 76.56888495 | 0.4259<br>82026 | -<br>1.231135<br>54 | 0.0340<br>12057 | 0.2478<br>43661 | Dow<br>n |
| CASK        | 705.62<br>12098 | 1110.293891 | 300.9485284 | 0.2710<br>53035 | -<br>1.883352<br>94 | 0.0001<br>54346 | 0.0069<br>78082 | Dow<br>n |
| CASKI<br>N1 | 56.872<br>57807 | 15.31728743 | 98.4278687  | 6.4259<br>33387 | 2.683906<br>026     | 0.0001<br>74237 | 0.0075<br>7364  | Up       |
| CASQ1       | 380.40<br>61309 | 719.5762109 | 41.23605086 | 0.0573<br>06023 | -<br>4.125169<br>41 | 0.0216<br>97023 | 0.1913<br>51941 | Dow<br>n |

|              |                 |             |             |                 |                     |                 |                 |          |
|--------------|-----------------|-------------|-------------|-----------------|---------------------|-----------------|-----------------|----------|
| CAST         | 4992.7<br>51811 | 7511.860238 | 2473.643385 | 0.3292<br>98377 | -<br>1.602532<br>69 | 0.0019<br>78673 | 0.0397<br>0332  | Dow<br>n |
| CAV1         | 11715.<br>1703  | 15981.6708  | 7448.66979  | 0.4660<br>75787 | -<br>1.101363<br>53 | 0.0047<br>41904 | 0.0718<br>81685 | Dow<br>n |
| CAV2         | 617.25<br>7571  | 929.3399136 | 305.1752284 | 0.3283<br>7848  | -<br>1.606568<br>51 | 0.0003<br>30494 | 0.0119<br>71432 | Dow<br>n |
| CBLC         | 798.62<br>2139  | 210.1529859 | 1387.091292 | 6.6003<br>88219 | 2.722550<br>883     | 3.03E-<br>05    | 0.0020<br>76084 | Up       |
| CBLN2        | 47.456<br>31482 | 94.91262964 | 0           | 0               | #NAME<br>?          | 0.0001<br>13117 | 0.0055<br>58799 | Dow<br>n |
| CBX6         | 369.98<br>7608  | 525.5598237 | 214.4153923 | 0.4079<br>75234 | -<br>1.293446<br>52 | 0.0159<br>33904 | 0.1594<br>43543 | Dow<br>n |
| CC2D2<br>B   | 661.05<br>45055 | 921.7412712 | 400.3677397 | 0.4343<br>60218 | -<br>1.203036<br>12 | 0.0180<br>45656 | 0.1726<br>22923 | Dow<br>n |
| CCBE1        | 115.85<br>21804 | 195.1405397 | 36.563821   | 0.1873<br>71732 | -<br>2.416024<br>78 | 0.0020<br>42054 | 0.0404<br>79788 | Dow<br>n |
| CCBL1        | 121.43<br>17781 | 79.21816929 | 163.6453868 | 2.0657<br>55726 | 1.046669<br>667     | 0.0375<br>99476 | 0.2623<br>50059 | Up       |
| CCDC1<br>09B | 129.75<br>6828  | 215.6879067 | 43.82574917 | 0.2031<br>90572 | -<br>2.299094<br>63 | 0.0006<br>90927 | 0.0194<br>13749 | Dow<br>n |
| CCDC1<br>25  | 208.01<br>34605 | 125.9756643 | 290.0512567 | 2.3024<br>38795 | 1.203162<br>806     | 0.0251<br>49356 | 0.2076<br>49151 | Up       |
| CCDC1<br>36  | 281.26<br>9704  | 518.4465962 | 44.09281174 | 0.0850<br>47934 | -3.55558            | 0.0004<br>07509 | 0.0136<br>89126 | Dow<br>n |
| CCDC1<br>38  | 240.69<br>85554 | 148.396657  | 333.0004538 | 2.2439<br>88919 | 1.166065<br>552     | 0.0191<br>78986 | 0.1792<br>59742 | Up       |
| CCDC1<br>41  | 166.75<br>39254 | 270.8435203 | 62.6643304  | 0.2313<br>67287 | -<br>2.111743<br>2  | 0.0191<br>9054  | 0.1792<br>59742 | Dow<br>n |
| CCDC1<br>51  | 30.696<br>15601 | 53.8347684  | 7.557543612 | 0.1403<br>84065 | -<br>2.832548<br>91 | 0.0032<br>32455 | 0.0550<br>61627 | Dow<br>n |
| CCDC1<br>55  | 39.095<br>61992 | 11.89606015 | 66.29517969 | 5.5728<br>68569 | 2.478420<br>129     | 0.0244<br>74779 | 0.2051<br>58245 | Up       |
| CCDC1<br>58  | 110.11<br>29148 | 26.98960895 | 193.2362206 | 7.1596<br>52477 | 2.839889<br>562     | 5.06E-<br>06    | 0.0005<br>03799 | Up       |
| CCDC1        | 145.72          | 67.44820805 | 224.0048438 | 3.3211          | 1.731677            | 0.0050          | 0.0753          | Up       |

|             |                 |             |             |                 |                     |                 |                 |      |
|-------------|-----------------|-------------|-------------|-----------------|---------------------|-----------------|-----------------|------|
| 60          | 65259           |             |             | 38548           | 909                 | 88154           | 72941           |      |
| CCDC1<br>70 | 249.99<br>02392 | 101.9186952 | 398.0617832 | 3.9056<br>79743 | 1.965573<br>656     | 0.0001<br>40783 | 0.0064<br>85021 | Up   |
| CCDC1<br>81 | 8.5775<br>58765 | 0.929455117 | 16.22566241 | 17.457<br>17692 | 4.125748<br>368     | 0.0191<br>04471 | 0.1788<br>4045  | Up   |
| CCDC2<br>8A | 185.33<br>89418 | 109.338149  | 261.3397346 | 2.3901<br>97172 | 1.257129<br>634     | 0.0132<br>17853 | 0.1421<br>8059  | Up   |
| CCDC3       | 6224.1<br>7762  | 10978.52944 | 1469.825804 | 0.1338<br>81848 | -<br>2.900967<br>73 | 0.0430<br>95983 | 0.2810<br>58724 | Down |
| CCDC3<br>0  | 86.708<br>56873 | 52.81154543 | 120.605592  | 2.2836<br>97458 | 1.191371<br>536     | 0.0305<br>46371 | 0.2342<br>79757 | Up   |
| CCDC3<br>9  | 39.896<br>287   | 15.82335257 | 63.96922142 | 4.0427<br>09731 | 2.015322<br>621     | 0.0070<br>39759 | 0.0931<br>69631 | Up   |
| CCDC5<br>7  | 496.05<br>16942 | 303.0739473 | 689.0294412 | 2.2734<br>69717 | 1.184895<br>787     | 0.0062<br>39608 | 0.0863<br>16172 | Up   |
| CCDC6<br>4  | 2867.1<br>14222 | 959.0884079 | 4775.140037 | 4.9788<br>3198  | 2.315807<br>33      | 0.0017<br>4789  | 0.0367<br>06729 | Up   |
| CCDC6<br>4B | 212.06<br>29274 | 52.71306383 | 371.4127909 | 7.0459<br>34421 | 2.816791<br>047     | 3.27E-<br>07    | 6.33E-<br>05    | Up   |
| CCDC6<br>7  | 178.71<br>51793 | 63.90762294 | 293.5227357 | 4.5929<br>2213  | 2.199412<br>324     | 0.0354<br>22992 | 0.2528<br>67175 | Up   |
| CCDC6<br>8  | 277.99<br>44397 | 71.34162966 | 484.6472497 | 6.7933<br>30233 | 2.764118<br>987     | 0.0110<br>92674 | 0.1265<br>65941 | Up   |
| CCDC6<br>9  | 573.26<br>69393 | 981.479572  | 165.0543066 | 0.1681<br>68866 | -<br>2.572017<br>46 | 4.30E-<br>06    | 0.0004<br>46    | Down |
| CCDC7       | 21.067<br>53182 | 4.763409889 | 37.37165374 | 7.8455<br>67485 | 2.971877<br>804     | 0.0023<br>34451 | 0.0444<br>21066 | Up   |
| CCDC8<br>0  | 18101.<br>50902 | 31796.48009 | 4406.537945 | 0.1385<br>85716 | -<br>2.851149<br>53 | 0.0140<br>45891 | 0.1475<br>67753 | Down |
| CCDC8<br>5C | 553.17<br>19941 | 325.8807437 | 780.4632445 | 2.3949<br>3514  | 1.259986<br>585     | 0.0132<br>37065 | 0.1423<br>02393 | Up   |
| CCDC8<br>8A | 749.64<br>7306  | 1088.711029 | 410.5835829 | 0.3771<br>28156 | -<br>1.406873<br>23 | 0.0074<br>35142 | 0.0966<br>12361 | Down |
| CCDC8<br>8B | 231.00<br>48237 | 152.5199531 | 309.4896942 | 2.0291<br>75121 | 1.020893<br>377     | 0.0384<br>7481  | 0.2643<br>45915 | Up   |
| CCL16       | 204.18<br>01388 | 294.4498567 | 113.9104208 | 0.3868<br>58469 | -<br>1.370122<br>24 | 0.0102<br>64589 | 0.1204<br>70344 | Down |
| CCL21       | 482.78<br>26321 | 659.8338465 | 305.7314177 | 0.4633<br>46067 | -<br>1.109837       | 0.0397<br>82959 | 0.2693<br>86183 | Down |

|            |                 |             |             |                 |                     |                 |                 |      |
|------------|-----------------|-------------|-------------|-----------------|---------------------|-----------------|-----------------|------|
|            |                 |             |             |                 | 97                  |                 |                 |      |
| CCL22      | 21.398<br>37321 | 5.273740025 | 37.52300639 | 7.1150<br>6563  | 2.830877<br>064     | 0.0068<br>92571 | 0.0921<br>68341 | Up   |
| CCL28      | 357.41<br>32795 | 39.24577598 | 675.580783  | 17.214<br>1018  | 4.105519<br>001     | 3.17E-<br>13    | 4.39E-<br>10    | Up   |
| CCL5       | 281.60<br>07044 | 146.6365224 | 416.5648864 | 2.8407<br>99002 | 1.506296<br>759     | 0.0024<br>8978  | 0.0461<br>59446 | Up   |
| CCM2L      | 100.70<br>52117 | 149.1808146 | 52.22960881 | 0.3501<br>09422 | -<br>1.514122<br>21 | 0.0049<br>93499 | 0.0743<br>82929 | Down |
| CCND2      | 160.55<br>81223 | 246.3687172 | 74.74752733 | 0.3033<br>9699  | -<br>1.720721<br>32 | 0.0020<br>20839 | 0.0403<br>2513  | Down |
| CCNE2      | 83.926<br>6396  | 122.7699258 | 45.08335341 | 0.3672<br>18218 | -<br>1.445290<br>46 | 0.0084<br>30427 | 0.1052<br>4323  | Down |
| CCNF       | 161.75<br>94835 | 222.738419  | 100.7805481 | 0.4524<br>6145  | -<br>1.144133<br>22 | 0.0490<br>30322 | 0.3025<br>85691 | Down |
| CCSER<br>1 | 143.07<br>13155 | 93.30534303 | 192.837288  | 2.0667<br>33606 | 1.047352<br>443     | 0.0309<br>86492 | 0.2360<br>01279 | Up   |
| CCSER<br>2 | 481.21<br>82333 | 646.5031265 | 315.9333401 | 0.4886<br>80297 | -<br>1.033037<br>16 | 0.0498<br>00621 | 0.3049<br>20735 | Down |
| CD109      | 1279.2<br>04896 | 1989.591543 | 568.8182486 | 0.2858<br>96998 | -<br>1.806432<br>63 | 0.0061<br>06722 | 0.0850<br>29651 | Down |
| CD177      | 54.301<br>39126 | 18.83672863 | 89.7660539  | 4.7654<br>80018 | 2.252621<br>542     | 0.0208<br>93567 | 0.1882<br>61267 | Up   |
| CD1E       | 66.184<br>47158 | 35.0402285  | 97.32871466 | 2.7776<br>27853 | 1.473853<br>32      | 0.0166<br>66603 | 0.1641<br>99265 | Up   |
| CD2        | 177.29<br>35232 | 103.8101361 | 250.7769103 | 2.4157<br>26631 | 1.272457<br>206     | 0.0225<br>32508 | 0.1957<br>44636 | Up   |
| CD200      | 182.89<br>23719 | 287.9495626 | 77.83518124 | 0.2703<br>08385 | -<br>1.887321<br>83 | 0.0358<br>72486 | 0.2543<br>64694 | Down |
| CD207      | 21.086<br>98446 | 2.592548787 | 39.58142013 | 15.267<br>37716 | 3.932380<br>332     | 0.0001<br>56565 | 0.0070<br>25544 | Up   |
| CD209      | 188.27<br>51529 | 368.2220705 | 8.328235198 | 0.0226<br>17425 | -<br>5.466421<br>48 | 0.0010<br>57761 | 0.0264<br>27904 | Down |
| CD244      | 191.20<br>53106 | 115.6359229 | 266.7746983 | 2.3070<br>22694 | 1.206032<br>195     | 0.0150<br>6165  | 0.1549<br>50462 | Up   |
| CD247      | 402.62          | 214.1504137 | 591.099513  | 2.7602          | 1.464776            | 0.0020          | 0.0406          | Up   |

|        |                 |             |             |                 |                     |                 |                 |          |
|--------|-----------------|-------------|-------------|-----------------|---------------------|-----------------|-----------------|----------|
|        | 49633           |             |             | 07196           | 568                 | 57348           | 48956           |          |
| CD248  | 4158.0<br>15537 | 7520.693247 | 795.3378276 | 0.1057<br>5326  | -<br>3.241225<br>96 | 1.90E-<br>08    | 6.47E-<br>06    | Dow<br>n |
| CD27   | 176.00<br>55983 | 68.13733184 | 283.8738647 | 4.1662<br>01655 | 2.058732<br>671     | 0.0391<br>54464 | 0.2669<br>34007 | Up       |
| CD276  | 1423.3<br>92245 | 2167.867131 | 678.91736   | 0.3131<br>72957 | -<br>1.674968<br>46 | 0.0014<br>47562 | 0.0323<br>97724 | Dow<br>n |
| CD300E | 37.060<br>31237 | 15.52396608 | 58.59665865 | 3.7745<br>93319 | 1.916321<br>215     | 0.0134<br>75406 | 0.1437<br>65035 | Up       |
| CD302  | 1317.6<br>95893 | 1862.690191 | 772.7015956 | 0.4148<br>30979 | -<br>1.269404<br>46 | 0.0068<br>91975 | 0.0921<br>68341 | Dow<br>n |
| CD37   | 178.01<br>2562  | 117.1543675 | 238.8707566 | 2.0389<br>40261 | 1.027819<br>506     | 0.0434<br>60818 | 0.2821<br>12159 | Up       |
| CD3D   | 230.35<br>955   | 127.1077327 | 333.6113674 | 2.6246<br>34713 | 1.392116<br>648     | 0.0063<br>72324 | 0.0876<br>14597 | Up       |
| CD3E   | 593.20<br>55822 | 273.8813026 | 912.5298617 | 3.3318<br>44317 | 1.736320<br>991     | 0.0003<br>52085 | 0.0125<br>02466 | Up       |
| CD3G   | 165.04<br>78758 | 77.48453462 | 252.611217  | 3.2601<br>50147 | 1.704938<br>41      | 0.0011<br>60925 | 0.0280<br>34715 | Up       |
| CD5    | 115.20<br>3815  | 58.45475173 | 171.9528783 | 2.9416<br>40725 | 1.556621<br>055     | 0.0461<br>94999 | 0.2925<br>95362 | Up       |
| CD52   | 461.07<br>87474 | 247.2381822 | 674.9193126 | 2.7298<br>34472 | 1.448813<br>473     | 0.0022<br>90041 | 0.0439<br>46867 | Up       |
| CD55   | 382.92<br>72577 | 665.6619499 | 100.1925654 | 0.1505<br>15687 | -<br>2.732014<br>24 | 0.0041<br>90907 | 0.0653<br>97719 | Dow<br>n |
| CD59   | 6908.8<br>32892 | 3274.541804 | 10543.12398 | 3.2197<br>24961 | 1.686937<br>454     | 0.0004<br>13384 | 0.0138<br>34954 | Up       |
| CD5L   | 66.143<br>62097 | 110.6809924 | 21.6062495  | 0.1952<br>11924 | -<br>2.356886<br>91 | 2.54E-<br>05    | 0.0018<br>04699 | Dow<br>n |
| CD6    | 96.478<br>39813 | 56.46414991 | 136.4926464 | 2.4173<br>32884 | 1.273416<br>156     | 0.0435<br>76874 | 0.2824<br>58939 | Up       |
| CD7    | 296.07<br>13637 | 103.1253453 | 489.017382  | 4.7419<br>70855 | 2.245486<br>796     | 0.0016<br>64171 | 0.0356<br>92935 | Up       |
| CD74   | 25100.<br>04729 | 15577.89205 | 34622.20252 | 2.2225<br>21662 | 1.152197<br>48      | 0.0112<br>20728 | 0.1276<br>23403 | Up       |
| CD83   | 190.61<br>9896  | 112.7203616 | 268.5194304 | 2.3821<br>73253 | 1.252278<br>343     | 0.0090<br>03277 | 0.1103<br>92717 | Up       |
| CD84   | 140.65<br>86166 | 79.26206031 | 202.0551729 | 2.5492<br>04148 | 1.350046<br>913     | 0.0108<br>09984 | 0.1243<br>66846 | Up       |

|              |                 |             |             |                 |                     |                 |                 |      |
|--------------|-----------------|-------------|-------------|-----------------|---------------------|-----------------|-----------------|------|
| CD8A         | 134.59<br>97933 | 65.9709478  | 203.2286387 | 3.0805<br>77823 | 1.623200<br>982     | 0.0028<br>93565 | 0.0511<br>23429 | Up   |
| CD96         | 218.69<br>87404 | 92.36115397 | 345.0363268 | 3.7357<br>29925 | 1.901390<br>159     | 0.0002<br>1708  | 0.0088<br>59496 | Up   |
| CD99         | 9581.5<br>69759 | 15010.5557  | 4152.583822 | 0.2766<br>44243 | -<br>1.853896<br>19 | 9.94E-<br>05    | 0.0049<br>78884 | Down |
| CDC42<br>BPA | 911.97<br>06046 | 1289.182912 | 534.7582976 | 0.4148<br>04054 | -<br>1.269498<br>1  | 0.0100<br>16663 | 0.1184<br>99792 | Down |
| CDC42<br>BPG | 1722.8<br>75598 | 921.7181598 | 2524.033037 | 2.7384<br>0003  | 1.453333<br>213     | 0.0014<br>18898 | 0.0318<br>74848 | Up   |
| CDC42<br>EP2 | 285.07<br>75404 | 457.3590103 | 112.7960706 | 0.2466<br>24792 | -<br>2.019610<br>26 | 4.28E-<br>05    | 0.0026<br>88224 | Down |
| CDCP1        | 809.17<br>87473 | 410.6250505 | 1207.732444 | 2.9412<br>04982 | 1.556407<br>334     | 0.0013<br>86862 | 0.0314<br>58359 | Up   |
| CDH1         | 2020.7<br>62323 | 552.2418135 | 3489.282832 | 6.3183<br>96664 | 2.659558<br>511     | 1.37E-<br>05    | 0.0010<br>9603  | Up   |
| CDH11        | 2673.4<br>89635 | 4433.209004 | 913.7702673 | 0.2061<br>19375 | -<br>2.278447<br>97 | 0.0004<br>5093  | 0.0145<br>51557 | Down |
| CDH13        | 4335.1<br>87424 | 6470.667602 | 2199.707247 | 0.3399<br>50587 | -<br>1.556603<br>04 | 0.0041<br>77226 | 0.0653<br>61438 | Down |
| CDH26        | 25.330<br>28146 | 6.222157009 | 44.43840592 | 7.1419<br>61518 | 2.836320<br>361     | 0.0018<br>72102 | 0.0380<br>75    | Up   |
| CDHR1        | 10.604<br>62086 | 3.144637445 | 18.06460427 | 5.7445<br>74561 | 2.522200<br>052     | 0.0430<br>28075 | 0.2807<br>17342 | Up   |
| CDHR4        | 85.297<br>93928 | 161.5221821 | 9.073696433 | 0.0561<br>76163 | -<br>4.153898<br>1  | 0.0225<br>73393 | 0.1958<br>64091 | Down |
| CDK14        | 876.22<br>16194 | 1308.231469 | 444.2117703 | 0.3395<br>51357 | -<br>1.558298<br>3  | 0.0034<br>31501 | 0.0574<br>75259 | Down |
| CDK18        | 236.99<br>97401 | 108.273149  | 365.7263313 | 3.3778<br>11902 | 1.756088<br>992     | 0.0016<br>40282 | 0.0352<br>6895  | Up   |
| CDKL4        | 36.390<br>61188 | 60.249568   | 12.53165575 | 0.2079<br>95778 | -<br>2.265373<br>85 | 0.0155<br>23794 | 0.1573<br>22315 | Down |
| CDKN1<br>C   | 451.90<br>07829 | 686.8512966 | 216.9502692 | 0.3158<br>62065 | -<br>1.662633<br>41 | 0.0332<br>53289 | 0.2444<br>40131 | Down |
| CDKN2        | 395.69          | 593.2462363 | 198.1506532 | 0.3340          | -                   | 0.0016          | 0.0351          | Down |

|              |                 |             |             |                 |                     |                 |                 |          |
|--------------|-----------------|-------------|-------------|-----------------|---------------------|-----------------|-----------------|----------|
| C            | 84448           |             |             | 10805           | 1.582033<br>32      | 27484           | 59493           | n        |
| CDKN3        | 26.633<br>81781 | 44.15153995 | 9.116095661 | 0.2064<br>72881 | -<br>2.275975<br>79 | 0.0214<br>72571 | 0.1904<br>34472 | Dow<br>n |
| CDR2L        | 944.76<br>53017 | 1455.3149   | 434.215703  | 0.2983<br>65462 | -<br>1.744847<br>55 | 0.0004<br>06403 | 0.0136<br>89126 | Dow<br>n |
| CDS1         | 175.42<br>65926 | 45.79737405 | 305.0558111 | 6.6609<br>89138 | 2.735736<br>429     | 0.0006<br>34633 | 0.0182<br>86337 | Up       |
| CEACA<br>M19 | 220.50<br>86056 | 90.39482048 | 350.6223908 | 3.8787<br>88507 | 1.955606<br>114     | 0.0004<br>5516  | 0.0146<br>35717 | Up       |
| CECR1        | 160.39<br>87328 | 74.76948504 | 246.0279806 | 3.2904<br>86493 | 1.718300<br>9       | 0.0019<br>92744 | 0.0399<br>41233 | Up       |
| CELA3<br>B   | 10.566<br>02098 | 21.13204196 | 0           | 0               | #NAME<br>?          | 0.0139<br>65213 | 0.1469<br>76942 | Dow<br>n |
| CELF6        | 347.01<br>31689 | 133.1263479 | 560.8999899 | 4.2132<br>90597 | 2.074947<br>424     | 8.68E-<br>05    | 0.0045<br>20444 | Up       |
| CELSR<br>1   | 931.04<br>19052 | 490.3807787 | 1371.703032 | 2.7972<br>20224 | 1.483993<br>841     | 0.0172<br>03005 | 0.1674<br>71673 | Up       |
| CELSR<br>2   | 451.02<br>87658 | 226.376189  | 675.6813426 | 2.9847<br>72143 | 1.577620<br>8       | 0.0095<br>26681 | 0.1145<br>78149 | Up       |
| CEMIP        | 479.65<br>67874 | 950.9058363 | 8.407738429 | 0.0088<br>4182  | -<br>6.821440<br>89 | 0.0401<br>16873 | 0.2701<br>26271 | Dow<br>n |
| CENPF        | 378.32<br>44381 | 540.2040383 | 216.4448378 | 0.4006<br>7238  | -<br>1.319505<br>03 | 0.0236<br>1187  | 0.2006<br>28601 | Dow<br>n |
| CENPM        | 195.09<br>27056 | 317.4357951 | 72.74961616 | 0.2291<br>78994 | -<br>2.125453<br>28 | 0.0017<br>79048 | 0.0368<br>45281 | Dow<br>n |
| CENPV        | 203.97<br>67974 | 121.6644268 | 286.2891679 | 2.3531<br>04974 | 1.234565<br>682     | 0.0200<br>41329 | 0.1837<br>02003 | Up       |
| CEP170       | 904.79<br>08164 | 1246.880561 | 562.7010714 | 0.4512<br>87067 | -<br>1.147882<br>66 | 0.0207<br>48286 | 0.1876<br>3021  | Dow<br>n |
| CEP170<br>B  | 1973.0<br>03352 | 1266.453458 | 2679.553246 | 2.1157<br>92909 | 1.081198<br>425     | 0.0243<br>78555 | 0.2046<br>36926 | Up       |
| CEP85L       | 272.32<br>75902 | 374.4520771 | 170.2031033 | 0.4545<br>39082 | -<br>1.137523<br>75 | 0.0233<br>42765 | 0.1992<br>80708 | Dow<br>n |
| CEP97        | 139.19<br>84452 | 190.8035066 | 87.59338383 | 0.4590<br>76384 | -<br>1.123193<br>88 | 0.0405<br>75889 | 0.2718<br>97645 | Dow<br>n |

|            |                 |             |             |                 |                     |                 |                 |          |
|------------|-----------------|-------------|-------------|-----------------|---------------------|-----------------|-----------------|----------|
| CERCA<br>M | 1614.6<br>16689 | 2796.881631 | 432.351746  | 0.1545<br>83498 | -<br>2.693541<br>78 | 0.0017<br>70238 | 0.0367<br>89544 | Dow<br>n |
| CERS4      | 71.877<br>4862  | 40.80851077 | 102.9464616 | 2.5226<br>71367 | 1.334952<br>276     | 0.0228<br>83502 | 0.1972<br>79526 | Up       |
| CES4A      | 23.109<br>74909 | 1.332180934 | 44.88731725 | 33.694<br>61017 | 5.074445<br>93      | 3.88E-<br>06    | 0.0004<br>1441  | Up       |
| CFAP43     | 19.589<br>43911 | 4.651970784 | 34.52690744 | 7.4219<br>95761 | 2.891807<br>177     | 0.0235<br>12015 | 0.2002<br>23737 | Up       |
| CFAP44     | 97.152<br>38431 | 60.26980195 | 134.0349667 | 2.2239<br>15831 | 1.153102<br>187     | 0.0260<br>94709 | 0.2121<br>32701 | Up       |
| CFAP46     | 170.24<br>14439 | 30.00854063 | 310.4743472 | 10.346<br>19947 | 3.371029<br>007     | 1.37E-<br>08    | 5.24E-<br>06    | Up       |
| CFAP54     | 105.45<br>98661 | 53.5321894  | 157.3875428 | 2.9400<br>54284 | 1.555842<br>793     | 0.0421<br>62464 | 0.2771<br>25457 | Up       |
| CFAP74     | 30.017<br>92737 | 6.953663066 | 53.08219168 | 7.6337<br>02005 | 2.932382<br>869     | 0.0015<br>19844 | 0.0333<br>94    | Up       |
| CFB        | 5382.4<br>93425 | 9735.810968 | 1029.175882 | 0.1057<br>10339 | -<br>3.241811<br>6  | 0.0004<br>95363 | 0.0154<br>59942 | Dow<br>n |
| CFI        | 1026.7<br>9526  | 301.8848867 | 1751.705633 | 5.8025<br>6154  | 2.536689<br>918     | 0.0164<br>83455 | 0.1630<br>18113 | Up       |
| CFL2       | 2161.8<br>89442 | 3990.909945 | 332.8689392 | 0.0834<br>06778 | -<br>3.583691<br>56 | 0.0022<br>47697 | 0.0434<br>11352 | Dow<br>n |
| CGN        | 1916.0<br>48678 | 837.426476  | 2994.67088  | 3.5760<br>40364 | 1.838363<br>021     | 0.0036<br>7442  | 0.0597<br>68133 | Up       |
| CGREF<br>1 | 522.69<br>17521 | 990.5451965 | 54.83830778 | 0.0553<br>61742 | -<br>4.174966<br>85 | 4.16E-<br>05    | 0.0026<br>4502  | Dow<br>n |
| CHI3L1     | 5174.5<br>76579 | 2767.617878 | 7581.53528  | 2.7393<br>7213  | 1.453845<br>262     | 0.0016<br>76154 | 0.0357<br>82139 | Up       |
| CHI3L2     | 28.677<br>65558 | 0.642863606 | 56.71244755 | 88.218<br>47597 | 6.463008<br>932     | 4.72E-<br>08    | 1.25E-<br>05    | Up       |
| CHL1       | 77.632<br>65464 | 127.3696071 | 27.8957022  | 0.2190<br>13804 | -<br>2.190906<br>29 | 0.0084<br>77805 | 0.1057<br>61493 | Dow<br>n |
| CHML       | 252.06<br>39032 | 345.0519629 | 159.0758435 | 0.4610<br>19964 | -<br>1.117098<br>87 | 0.0339<br>19064 | 0.2475<br>18604 | Dow<br>n |
| CHN1       | 516.90<br>06621 | 815.8432778 | 217.9580463 | 0.2671<br>56759 | -<br>1.904241<br>58 | 0.0064<br>39256 | 0.0880<br>81407 | Dow<br>n |
| CHPF       | 1653.5          | 2295.482934 | 1011.639782 | 0.4407          | -                   | 0.0118          | 0.1323          | Dow      |



|        |             |             |             |             |             |             |             |      |
|--------|-------------|-------------|-------------|-------------|-------------|-------------|-------------|------|
|        | 61358       |             |             | 0891        | 1.18210203  | 07422       | 76681       | n    |
| CHRDL1 | 1522.941243 | 2733.819513 | 312.0629724 | 0.114149076 | -3.13100891 | 3.82E-06    | 0.000410362 | Down |
| CHRDL2 | 572.1393248 | 1091.550492 | 52.72815783 | 0.048305743 | -4.37166146 | 0.000183312 | 0.007780616 | Down |
| CHRNB1 | 182.2874023 | 116.9487428 | 247.6260619 | 2.117389687 | 1.082286809 | 0.039670016 | 0.26919383  | Up   |
| CHST12 | 303.2622735 | 461.7613274 | 144.7632195 | 0.31350226  | -1.67345225 | 0.01568827  | 0.158100954 | Down |
| CHST15 | 768.8600766 | 1048.659386 | 489.0607673 | 0.466367606 | -1.10046051 | 0.026801842 | 0.215742268 | Down |
| CHST3  | 1078.833286 | 1538.061868 | 619.6047047 | 0.402847712 | -1.31169353 | 0.013109663 | 0.14152317  | Down |
| CHST8  | 101.0367718 | 20.54670623 | 181.5268374 | 8.834838797 | 3.143203811 | 0.0253312   | 0.20865275  | Up   |
| CHST9  | 46.06560287 | 73.56536051 | 18.56584523 | 0.25237211  | -1.98637561 | 0.005142686 | 0.075915642 | Down |
| CHSY3  | 128.496542  | 234.3080976 | 22.68498645 | 0.096816912 | -3.36859711 | 0.026691782 | 0.215336783 | Down |
| CIDEB  | 137.5764448 | 220.3211897 | 54.83169989 | 0.248871659 | -2.00652615 | 0.00805975  | 0.102349815 | Down |
| CIDEC  | 521.6680603 | 1037.971212 | 5.364908953 | 0.005168649 | -7.59599703 | 0.0026377   | 0.047772554 | Down |
| CILP   | 5645.229838 | 10981.20584 | 309.2538393 | 0.028162102 | -5.15010117 | 0.00577355  | 0.081621532 | Down |
| CIRBP  | 6207.159682 | 3858.976964 | 8555.342401 | 2.216997531 | 1.148607164 | 0.005550302 | 0.079210362 | Up   |
| CIST1  | 166.4730614 | 23.84814548 | 309.0979773 | 12.96109073 | 3.696115227 | 0.002794308 | 0.050106364 | Up   |
| CKAP2  | 388.6541091 | 579.0536916 | 198.2545266 | 0.34237676  | -1.54634332 | 0.003215271 | 0.054979591 | Down |
| CKAP4  | 3056.8      | 5087.024564 | 1026.691185 | 0.2018      | -           | 3.18E-      | 0.0003      | Down |

|             |                 |             |             |                 |                     |                 |                 |          |
|-------------|-----------------|-------------|-------------|-----------------|---------------------|-----------------|-----------------|----------|
|             | 57875           |             |             | 25482           | 2.308819<br>76      | 06              | 5726            | n        |
| CKMT1<br>B  | 41.507<br>59876 | 14.26700281 | 68.74819472 | 4.8186<br>85161 | 2.268639<br>543     | 0.0192<br>05751 | 0.1792<br>59742 | Up       |
| CLCN3       | 846.11<br>66269 | 441.8488825 | 1250.384371 | 2.8298<br>91442 | 1.500746<br>711     | 0.0022<br>96741 | 0.0439<br>81857 | Up       |
| CLCN4       | 233.52<br>55654 | 87.80209063 | 379.2490401 | 4.3193<br>623   | 2.110818<br>332     | 0.0065<br>48229 | 0.0890<br>62785 | Up       |
| CLDN1       | 88.377<br>6992  | 31.60172311 | 145.1536753 | 4.5932<br>20275 | 2.199505<br>972     | 0.0003<br>45994 | 0.0123<br>97044 | Up       |
| CLDN1<br>1  | 97.735<br>99461 | 174.5892188 | 20.8827704  | 0.1196<br>10882 | -<br>3.063579<br>45 | 0.0212<br>82716 | 0.1893<br>09131 | Dow<br>n |
| CLDN1<br>9  | 11.730<br>97298 | 3.524136401 | 19.93780957 | 5.6575<br>02236 | 2.500165<br>25      | 0.0403<br>90182 | 0.2710<br>55984 | Up       |
| CLDN2<br>3  | 59.439<br>85491 | 9.811278793 | 109.068431  | 11.116<br>63763 | 3.474648<br>587     | 0.0006<br>41218 | 0.0183<br>31103 | Up       |
| CLDN4       | 1050.8<br>86368 | 360.8890546 | 1740.883682 | 4.8238<br>74981 | 2.270192<br>518     | 0.0061<br>28219 | 0.0851<br>67138 | Up       |
| CLDN5       | 1449.0<br>31747 | 2107.621152 | 790.4423424 | 0.3750<br>4005  | -<br>1.414883<br>43 | 0.0003<br>69159 | 0.0129<br>78894 | Dow<br>n |
| CLDN7       | 2347.6<br>88455 | 660.8956854 | 4034.481225 | 6.1045<br>65841 | 2.609888<br>694     | 9.18E-<br>08    | 2.27E-<br>05    | Up       |
| CLEC11<br>A | 229.35<br>88793 | 390.9204133 | 67.79734524 | 0.1734<br>30046 | -<br>2.527574<br>23 | 1.25E-<br>05    | 0.0010<br>16264 | Dow<br>n |
| CLEC3<br>B  | 3630.5<br>54755 | 4944.464365 | 2316.645145 | 0.4685<br>33085 | -<br>1.093777<br>17 | 0.0050<br>89209 | 0.0753<br>72941 | Dow<br>n |
| CLEC4<br>A  | 61.015<br>06806 | 25.26025782 | 96.7698783  | 3.8309<br>14118 | 1.937688<br>684     | 0.0034<br>43609 | 0.0575<br>17829 | Up       |
| CLEC4<br>E  | 21.168<br>42093 | 4.91576564  | 37.42107621 | 7.6124<br>61406 | 2.928363<br>009     | 0.0051<br>11074 | 0.0756<br>12976 | Up       |
| CLEC4<br>G  | 17.369<br>11491 | 33.23775513 | 1.500474683 | 0.0451<br>43683 | -<br>4.469332<br>06 | 0.0014<br>676   | 0.0327<br>36573 | Dow<br>n |
| CLEC6<br>A  | 43.161<br>18294 | 18.13931152 | 68.18305435 | 3.7588<br>55692 | 1.910293<br>529     | 0.0111<br>47163 | 0.1268<br>66675 | Up       |
| CLEC7<br>A  | 61.345<br>60678 | 30.87021705 | 91.8209965  | 2.9744<br>20178 | 1.572608<br>463     | 0.0243<br>29394 | 0.2044<br>53029 | Up       |
| CLEC9<br>A  | 22.940<br>05114 | 9.259620342 | 36.62048194 | 3.9548<br>57822 | 1.983625<br>83      | 0.0211<br>26893 | 0.1885<br>73983 | Up       |
| CLIC4       | 3507.2          | 4947.49447  | 2066.948811 | 0.4177          | -                   | 0.0019          | 0.0384          | Dow      |

|        |             |             |             |             |             |             |             |      |
|--------|-------------|-------------|-------------|-------------|-------------|-------------|-------------|------|
|        | 2164        |             |             | 76881       | 1.25919543  | 04142       | 64524       | n    |
| CLIC6  | 456.1371761 | 114.1256401 | 798.1487121 | 6.993596805 | 2.806034624 | 0.02060626  | 0.186698305 | Up   |
| CLIP3  | 578.7752863 | 809.3239053 | 348.2266673 | 0.430268604 | -1.21669052 | 0.020979308 | 0.188401543 | Down |
| CLIP4  | 134.2186315 | 65.71695502 | 202.7203079 | 3.084748949 | 1.625153081 | 0.021048234 | 0.18843831  | Up   |
| CLK1   | 5233.639378 | 3230.610523 | 7236.668233 | 2.240031159 | 1.1635188   | 0.010411704 | 0.121696857 | Up   |
| CLMP   | 555.4713981 | 947.4493927 | 163.4934036 | 0.172561622 | -2.53481646 | 0.021101976 | 0.1885305   | Down |
| CLN3   | 990.5489836 | 548.4113356 | 1432.686631 | 2.61243074  | 1.385392789 | 0.003556794 | 0.058648091 | Up   |
| CLSTN1 | 10762.06876 | 6347.529165 | 15176.60835 | 2.3909474   | 1.257582391 | 0.009888157 | 0.117273155 | Up   |
| CLSTN2 | 55.86313597 | 94.30384892 | 17.42242303 | 0.184747741 | -2.43637137 | 0.001127582 | 0.027450006 | Down |
| CNKS1  | 263.7595083 | 87.5169708  | 440.0020458 | 5.027619692 | 2.329875523 | 8.16E-06    | 0.000725474 | Up   |
| CNN1   | 24350.55684 | 47054.96906 | 1646.144623 | 0.034983439 | -4.83718409 | 0.005384968 | 0.078023651 | Down |
| CNNM1  | 17.78635653 | 5.450594721 | 30.12211834 | 5.526391134 | 2.466337674 | 0.022939426 | 0.197379326 | Up   |
| CNPY4  | 688.798587  | 923.1626859 | 454.4344881 | 0.492258293 | -1.02251258 | 0.043344198 | 0.281862289 | Down |
| CNST   | 494.8808666 | 674.8192614 | 314.9424718 | 0.466706405 | -1.09941283 | 0.046808653 | 0.294642218 | Down |
| CNTN1  | 361.4761248 | 628.4711217 | 94.4811278  | 0.150334875 | -2.73374836 | 0.004130929 | 0.065081069 | Down |
| CNTNA3 | 39.63092734 | 72.36123599 | 6.900618704 | 0.095363472 | -3.39041943 | 0.034049677 | 0.247843661 | Down |
| COBL   | 193.8606473 | 53.98812856 | 333.7331661 | 6.181602789 | 2.627980954 | 2.05E-06    | 0.000251269 | Up   |
| COCH   | 230.5992288 | 446.8312196 | 14.36723793 | 0.032153613 | -4.958875   | 0.004707123 | 0.071414461 | Down |

|             |                 |             |             |                 |                     |                 |                 |          |
|-------------|-----------------|-------------|-------------|-----------------|---------------------|-----------------|-----------------|----------|
|             |                 |             |             |                 | 35                  |                 |                 |          |
| COL11<br>A1 | 314.05<br>04728 | 612.3355784 | 15.76536709 | 0.0257<br>46286 | -<br>5.279491<br>84 | 0.0213<br>26809 | 0.1894<br>32264 | Dow<br>n |
| COL11<br>A2 | 88.755<br>84047 | 49.89509267 | 127.6165883 | 2.5576<br>98191 | 1.354846<br>036     | 0.0153<br>83909 | 0.1566<br>0854  | Up       |
| COL12<br>A1 | 19057.<br>31531 | 36190.31587 | 1924.314758 | 0.0531<br>72091 | -<br>4.233187       | 6.72E-<br>06    | 0.0006<br>18667 | Dow<br>n |
| COL14<br>A1 | 12680.<br>18153 | 23709.91862 | 1650.444442 | 0.0696<br>09874 | -<br>3.844564<br>23 | 0.0004<br>63808 | 0.0147<br>82042 | Dow<br>n |
| COL17<br>A1 | 6391.5<br>96102 | 1845.626528 | 10937.56568 | 5.9262<br>07447 | 2.567109<br>129     | 0.0002<br>6608  | 0.0102<br>12378 | Up       |
| COL1A<br>1  | 45393<br>8.1285 | 885246.6167 | 22629.64029 | 0.0255<br>63092 | -<br>5.289793<br>87 | 0.0012<br>93362 | 0.0300<br>65673 | Dow<br>n |
| COL1A<br>2  | 27868<br>4.0338 | 542331.1411 | 15036.9265  | 0.0277<br>26467 | -<br>5.172592<br>39 | 0.0008<br>83542 | 0.0231<br>66008 | Dow<br>n |
| COL21<br>A1 | 932.22<br>76654 | 1522.812693 | 341.6426374 | 0.2243<br>49744 | -<br>2.156178<br>56 | 0.0070<br>92893 | 0.0935<br>98168 | Dow<br>n |
| COL23<br>A1 | 174.12<br>50349 | 35.72524376 | 312.524826  | 8.7480<br>11017 | 3.128955<br>037     | 0.0090<br>26608 | 0.1103<br>9388  | Up       |
| COL26<br>A1 | 171.82<br>73755 | 11.05055228 | 332.6041988 | 30.098<br>42316 | 4.911616<br>002     | 0.0022<br>64944 | 0.0436<br>27237 | Up       |
| COL3A<br>1  | 48026<br>5.156  | 927055.5739 | 33474.73809 | 0.0361<br>08664 | -<br>4.791511<br>15 | 0.0013<br>401   | 0.0307<br>36638 | Dow<br>n |
| COL4A<br>1  | 49189.<br>12746 | 73999.15995 | 24379.09498 | 0.3294<br>50969 | -<br>1.601864<br>32 | 0.0001<br>62967 | 0.0072<br>22996 | Dow<br>n |
| COL4A<br>2  | 35181.<br>96085 | 52099.9766  | 18263.94511 | 0.3505<br>55726 | -<br>1.512284<br>3  | 0.0003<br>71206 | 0.0130<br>0231  | Dow<br>n |
| COL5A<br>1  | 26246.<br>10891 | 49046.3046  | 3445.91323  | 0.0702<br>58366 | -<br>3.831186<br>16 | 5.23E-<br>05    | 0.0031<br>21744 | Dow<br>n |
| COL5A<br>2  | 30034.<br>89451 | 56638.62008 | 3431.16893  | 0.0605<br>80023 | -<br>4.045014<br>05 | 0.0003<br>97445 | 0.0135<br>52956 | Dow<br>n |
| COL5A<br>3  | 4654.8<br>84193 | 8341.040639 | 968.7277477 | 0.1161<br>39915 | -<br>3.106064<br>22 | 0.0063<br>6729  | 0.0876<br>12167 | Dow<br>n |

|              |                 |             |             |                 |                     |                 |                 |          |
|--------------|-----------------|-------------|-------------|-----------------|---------------------|-----------------|-----------------|----------|
| COL6A<br>1   | 46420.<br>63927 | 82039.39864 | 10801.8799  | 0.1316<br>6698  | -<br>2.925034<br>5  | 0.0032<br>88799 | 0.0555<br>94325 | Dow<br>n |
| COL6A<br>2   | 40192.<br>30048 | 69925.75253 | 10458.84844 | 0.1495<br>70767 | -<br>2.741099<br>86 | 0.0049<br>74535 | 0.0742<br>23031 | Dow<br>n |
| COL6A<br>3   | 68762.<br>19043 | 132187.0427 | 5337.338194 | 0.0403<br>77166 | -<br>4.630316<br>53 | 6.36E-<br>06    | 0.0005<br>91399 | Dow<br>n |
| COL6A<br>6   | 537.80<br>58403 | 1069.678383 | 5.933297534 | 0.0055<br>46805 | -<br>7.494127<br>25 | 7.88E-<br>12    | 9.35E-<br>09    | Dow<br>n |
| COL7A<br>1   | 2431.9<br>72094 | 858.7079874 | 4005.2362   | 4.6642<br>58699 | 2.221647<br>808     | 0.0119<br>28632 | 0.1331<br>56085 | Up       |
| COL8A<br>1   | 18018.<br>50579 | 35961.45966 | 75.55192609 | 0.0021<br>00914 | -<br>8.894767<br>33 | 0.0004<br>61563 | 0.0147<br>82042 | Dow<br>n |
| COL9A<br>1   | 544.25<br>45884 | 173.2719857 | 915.2371911 | 5.2820<br>84046 | 2.401107<br>257     | 1.51E-<br>06    | 0.0001<br>95949 | Up       |
| COL9A<br>3   | 178.78<br>94704 | 81.92937801 | 275.6495629 | 3.3644<br>7767  | 1.750382<br>546     | 0.0191<br>56364 | 0.1792<br>33225 | Up       |
| COLGA<br>LT1 | 1858.8<br>66547 | 2684.841    | 1032.892094 | 0.3847<br>12575 | -<br>1.378147<br>11 | 0.0036<br>36789 | 0.0594<br>19902 | Dow<br>n |
| COLQ         | 38.703<br>35242 | 72.93864693 | 4.468057918 | 0.0612<br>57757 | -<br>4.028963<br>64 | 0.0008<br>13345 | 0.0217<br>95968 | Dow<br>n |
| COMP         | 116.13<br>17535 | 224.0890496 | 8.174457345 | 0.0364<br>78611 | -<br>4.776805<br>38 | 1.95E-<br>10    | 1.53E-<br>07    | Dow<br>n |
| COPZ2        | 1005.5<br>15095 | 1668.65418  | 342.3760097 | 0.2051<br>80926 | -<br>2.285031<br>47 | 0.0008<br>6059  | 0.0226<br>95616 | Dow<br>n |
| CORO1<br>A   | 1037.6<br>95812 | 686.5197865 | 1388.871837 | 2.0230<br>61627 | 1.016540<br>269     | 0.0200<br>75573 | 0.1838<br>29071 | Up       |
| CORO1<br>C   | 2262.7<br>08712 | 3393.820705 | 1131.596718 | 0.3334<br>2855  | -<br>1.584550<br>45 | 0.0125<br>39806 | 0.1375<br>10981 | Dow<br>n |
| CORO2<br>A   | 245.00<br>30008 | 130.6487665 | 359.3572352 | 2.7505<br>59724 | 1.459725<br>229     | 0.0453<br>0431  | 0.2892<br>42548 | Up       |
| CORO2<br>B   | 223.88<br>41943 | 350.0069304 | 97.7614582  | 0.2793<br>12921 | -<br>1.840045<br>78 | 0.0003<br>7711  | 0.0131<br>07313 | Dow<br>n |
| COX7A        | 209.49          | 303.9243795 | 115.0673483 | 0.3786          | -                   | 0.0202          | 0.1849          | Dow      |

|         |             |             |             |             |             |             |             |      |
|---------|-------------|-------------|-------------|-------------|-------------|-------------|-------------|------|
| 1       | 58639       |             |             | 05193       | 1.4012339   | 84748       | 30623       | n    |
| COX7B2  | 15.57439495 | 23.70837265 | 7.440417259 | 0.313830788 | -1.6719412  | 0.045513866 | 0.289909829 | Down |
| CPE     | 1366.860683 | 2557.269756 | 176.4516104 | 0.068999999 | -3.85725985 | 0.005373392 | 0.077918506 | Down |
| CPEB4   | 1061.396624 | 1544.38491  | 578.4083383 | 0.374523433 | -1.41687211 | 0.001262241 | 0.029548792 | Down |
| CPED1   | 330.6440706 | 586.3121461 | 74.97599515 | 0.127877268 | -2.96716827 | 0.005115033 | 0.075612976 | Down |
| CPN1    | 5.91490134  | 11.82980268 | 0           | 0           | #NAME?      | 0.038738001 | 0.265398711 | Down |
| CPNE2   | 352.3325827 | 551.9239028 | 152.7412625 | 0.276743337 | -1.85337951 | 0.010951872 | 0.125515136 | Down |
| CPNE8   | 361.0121825 | 514.5352371 | 207.4891279 | 0.403255429 | -1.31023414 | 0.00965413  | 0.115484649 | Down |
| CRABP1  | 96.56108403 | 44.84978647 | 148.2723816 | 3.305977425 | 1.725076873 | 0.042579294 | 0.278393577 | Up   |
| CRABP2  | 584.4206927 | 1058.98565  | 109.8557352 | 0.103736755 | -3.26900094 | 0.011421475 | 0.129173661 | Down |
| CRACR2A | 535.0666145 | 289.8869418 | 780.2462872 | 2.691553756 | 1.42843924  | 0.002398098 | 0.045280316 | Up   |
| CRB1    | 32.08973293 | 57.5425872  | 6.636878658 | 0.115338552 | -3.11605329 | 9.82E-05    | 0.004972847 | Down |
| CRB3    | 145.3687994 | 58.51670713 | 232.2208917 | 3.968454533 | 1.988577277 | 0.002384693 | 0.045091696 | Up   |
| CREB3L4 | 283.4949688 | 134.5526139 | 432.4373236 | 3.213890173 | 1.684320629 | 0.01550176  | 0.157322315 | Up   |
| CREB5   | 235.8379329 | 375.807548  | 95.86831777 | 0.2550995   | -1.97086802 | 0.011270518 | 0.127947691 | Down |
| CRELD2  | 546.2610432 | 737.9664229 | 354.5556635 | 0.480449588 | -1.05754303 | 0.012470384 | 0.13716662  | Down |
| CRIP2   | 2337.219927 | 3130.639438 | 1543.800416 | 0.493126228 | -1.019971   | 0.026705191 | 0.215348654 | Down |

|                |                 |             |             |                 |                     |                 |                 |      |
|----------------|-----------------|-------------|-------------|-----------------|---------------------|-----------------|-----------------|------|
|                |                 |             |             |                 | 11                  |                 |                 |      |
| CRISP3         | 2184.0<br>52233 | 24.34951542 | 4343.75495  | 178.39<br>18437 | 7.478905<br>845     | 0.0178<br>46734 | 0.1715<br>16903 | Up   |
| CRISPL<br>D2   | 10086.<br>85404 | 14829.34023 | 5344.367856 | 0.3603<br>91479 | -<br>1.472363<br>19 | 0.0203<br>5089  | 0.1851<br>24679 | Down |
| CRLF1          | 2387.8<br>0831  | 4583.677406 | 191.939213  | 0.0418<br>74503 | -<br>4.577784<br>12 | 2.16E-<br>05    | 0.0015<br>98892 | Down |
| CRYBA<br>4     | 43.708<br>43287 | 23.70903346 | 63.70783228 | 2.6870<br>69989 | 1.426033<br>899     | 0.0454<br>07561 | 0.2893<br>34863 | Up   |
| CSF1           | 1600.5<br>85784 | 2263.618502 | 937.5530656 | 0.4141<br>83337 | -<br>1.271658<br>58 | 0.0111<br>43327 | 0.1268<br>66675 | Down |
| CSF1R          | 1445.4<br>03043 | 928.2159693 | 1962.590116 | 2.1143<br>67972 | 1.080226<br>476     | 0.0197<br>02179 | 0.1821<br>66896 | Up   |
| CSGAL<br>NACT1 | 585.49<br>42063 | 891.6402822 | 279.3481304 | 0.3132<br>96893 | -<br>1.674397<br>63 | 0.0296<br>08259 | 0.2295<br>24443 | Down |
| CSGAL<br>NACT2 | 673.58<br>91867 | 957.1767541 | 390.0016194 | 0.4074<br>49949 | -<br>1.295305<br>25 | 0.0275<br>37229 | 0.2190<br>22964 | Down |
| CSRP1          | 16487.<br>81221 | 28021.19853 | 4954.425897 | 0.1768<br>09921 | -<br>2.499728<br>87 | 0.0493<br>60542 | 0.3031<br>71541 | Down |
| CSRP2          | 788.66<br>96825 | 1174.405222 | 402.9341432 | 0.3430<br>96349 | -<br>1.543314<br>32 | 0.0072<br>59686 | 0.0950<br>34456 | Down |
| CST3           | 15711.<br>03985 | 27996.4466  | 3425.633095 | 0.1223<br>59567 | -<br>3.030801<br>18 | 0.0071<br>61014 | 0.0941<br>52721 | Down |
| CST7           | 80.285<br>32653 | 31.67694077 | 128.8937123 | 4.0690<br>07586 | 2.024676<br>97      | 0.0013<br>59214 | 0.0310<br>36526 | Up   |
| CTGF           | 16972.<br>38124 | 32305.19847 | 1639.564014 | 0.0507<br>52328 | -<br>4.300382<br>2  | 0.0105<br>95618 | 0.1228<br>32337 | Down |
| CTHRC<br>1     | 651.49<br>71042 | 1287.339323 | 15.65488578 | 0.0121<br>60652 | -<br>6.361635<br>58 | 0.0004<br>62652 | 0.0147<br>82042 | Down |
| CTNNA<br>2     | 12.998<br>02668 | 2.259503554 | 23.73654981 | 10.505<br>20579 | 3.393032<br>518     | 0.0096<br>90651 | 0.1156<br>14855 | Up   |
| CTNNB<br>IP1   | 313.12<br>44167 | 178.3177962 | 447.9310371 | 2.5119<br>81679 | 1.328825<br>942     | 0.0087<br>30728 | 0.1082<br>55887 | Up   |
| CTSW           | 587.49          | 205.0563372 | 969.9323858 | 4.7300          | 2.241863            | 3.21E-          | 0.0003          | Up   |

|           |             |             |             |             |             |             |             |      |
|-----------|-------------|-------------|-------------|-------------|-------------|-------------|-------------|------|
|           | 43615       |             |             | 77592       | 85          | 06          | 57717       |      |
| CX3CL1    | 1101.124691 | 540.5054704 | 1661.743912 | 3.074425706 | 1.620316944 | 0.000282941 | 0.010686944 | Up   |
| CX3CR1    | 652.6169496 | 223.7440017 | 1081.489898 | 4.833603982 | 2.273099278 | 3.14E-06    | 0.000355903 | Up   |
| CXADR     | 142.1494986 | 67.32425411 | 216.9747431 | 3.222831741 | 1.68832887  | 0.001280004 | 0.029832032 | Up   |
| CXCL10    | 223.7953261 | 64.2720629  | 383.3185892 | 5.964000095 | 2.576280281 | 0.010595834 | 0.122832337 | Up   |
| CXCL13    | 235.7372126 | 2.923461523 | 468.5509637 | 160.2726631 | 7.324384563 | 0.000157704 | 0.007059108 | Up   |
| CXCR3     | 32.50820159 | 10.89735465 | 54.11904852 | 4.966255595 | 2.312158514 | 0.004538162 | 0.069317803 | Up   |
| CXCR6     | 158.5125776 | 71.0138909  | 246.0112642 | 3.464269611 | 1.792551214 | 0.001441737 | 0.032307445 | Up   |
| CXHXorf36 | 647.28057   | 951.5279758 | 343.0331642 | 0.360507702 | -1.47189801 | 0.000369818 | 0.012978894 | Down |
| CYB561    | 1070.365233 | 434.0634909 | 1706.666975 | 3.931837187 | 1.975203583 | 4.39E-05    | 0.00274926  | Up   |
| CYP11A1   | 620.992862  | 42.53802444 | 1199.4477   | 28.1970711  | 4.817473409 | 2.53E-07    | 5.18E-05    | Up   |
| CYP24A1   | 14.62384149 | 5.204059441 | 24.04362355 | 4.620166972 | 2.207944991 | 0.039880295 | 0.269640422 | Up   |
| CYP26B1   | 1023.623903 | 1993.444004 | 53.80380185 | 0.026990375 | -5.21141115 | 0.043373684 | 0.281952389 | Down |
| CYP2B6    | 103.4297228 | 14.8617104  | 191.9977352 | 12.9189528  | 3.691417226 | 0.003524176 | 0.058430708 | Up   |
| CYP2S1    | 118.2509483 | 56.90115821 | 179.6007385 | 3.156363493 | 1.658263358 | 0.023308138 | 0.199173614 | Up   |
| DAAM2     | 1364.835533 | 2184.075176 | 545.5958898 | 0.249806369 | -2.00111783 | 3.14E-05    | 0.002143069 | Down |
| DAB2      | 2127.002375 | 3691.785014 | 562.2197351 | 0.152289403 | -2.71511254 | 0.001251844 | 0.029534737 | Down |
| DACT1     | 657.8317185 | 1022.485694 | 293.1777426 | 0.28673041  | -1.80223317 | 0.002145022 | 0.041786231 | Down |
| DACT2     | 201.8918376 | 387.6570357 | 16.1266394  | 0.041600275 | -4.58726311 | 1.35E-13    | 2.44E-10    | Down |
| DACT3     | 329.62      | 586.5846124 | 72.66257057 | 0.1238      | -           | 0.0311      | 0.2364      | Down |



|             |                 |             |             |                 |                     |                 |                 |      |
|-------------|-----------------|-------------|-------------|-----------------|---------------------|-----------------|-----------------|------|
|             | 35915           |             |             | 7398            | 3.013054<br>92      | 98216           | 04504           | n    |
| DAGLA       | 642.85<br>96509 | 354.2462806 | 931.4730212 | 2.6294<br>50391 | 1.394761<br>278     | 0.0025<br>68425 | 0.0471<br>81072 | Up   |
| DAO         | 9.9346<br>34802 | 1.572318722 | 18.29695088 | 11.636<br>92235 | 3.540637<br>65      | 0.0256<br>32194 | 0.2100<br>76853 | Up   |
| DAPP1       | 114.06<br>31167 | 58.65377328 | 169.47246   | 2.8893<br>70122 | 1.530755<br>022     | 0.0060<br>62307 | 0.0845<br>76914 | Up   |
| DBN1        | 2990.5<br>82981 | 4265.180914 | 1715.985049 | 0.4023<br>24094 | -<br>1.313569<br>95 | 0.0131<br>27901 | 0.1416<br>35287 | Down |
| DBND<br>D1  | 69.234<br>9154  | 29.28576416 | 109.1840667 | 3.7282<br>30073 | 1.898490<br>893     | 0.0020<br>25917 | 0.0403<br>81796 | Up   |
| DCBLD<br>2  | 960.66<br>24631 | 1520.621041 | 400.7038855 | 0.2635<br>13311 | -<br>1.924052<br>25 | 0.0001<br>5246  | 0.0069<br>10096 | Down |
| DCLK1       | 1608.1<br>91666 | 3003.392687 | 212.9906458 | 0.0709<br>16683 | -<br>3.817731<br>14 | 0.0010<br>10796 | 0.0255<br>40201 | Down |
| DCLRE<br>1B | 135.41<br>90526 | 206.6389624 | 64.19914283 | 0.3106<br>82662 | -<br>1.686486<br>36 | 0.0063<br>94111 | 0.0878<br>47192 | Down |
| DCN         | 63108.<br>05744 | 112482.7627 | 13733.35222 | 0.1220<br>92949 | -<br>3.033948<br>21 | 0.0256<br>76703 | 0.2101<br>55194 | Down |
| DCUN1<br>D3 | 552.27<br>54347 | 755.6253676 | 348.9255017 | 0.4617<br>70497 | -<br>1.114752<br>09 | 0.0280<br>43331 | 0.2214<br>85838 | Down |
| DDAH2       | 1622.1<br>10935 | 2496.433701 | 747.7881688 | 0.2995<br>42571 | -<br>1.739167<br>04 | 0.0006<br>05054 | 0.0177<br>18442 | Down |
| DDC         | 40.490<br>50176 | 62.94353569 | 18.03746783 | 0.2865<br>6585  | -<br>1.803061<br>4  | 0.0237<br>16046 | 0.2011<br>48155 | Down |
| DDIT4L      | 247.19<br>21083 | 446.4703043 | 47.91391231 | 0.1073<br>17131 | -<br>3.220047<br>7  | 0.0439<br>45001 | 0.2838<br>25232 | Down |
| DDR1        | 3980.2<br>47157 | 1614.748026 | 6345.746288 | 3.9298<br>67808 | 1.974480<br>784     | 0.0003<br>84152 | 0.0133<br>00806 | Up   |
| DDR2        | 4429.4<br>83082 | 6056.988898 | 2801.977267 | 0.4626<br>02345 | -<br>1.112155<br>52 | 0.0317<br>85007 | 0.2392<br>86231 | Down |
| DEF6        | 175.10<br>86916 | 96.35067553 | 253.8667076 | 2.6348<br>20214 | 1.397704<br>524     | 0.0107<br>36124 | 0.1239<br>08471 | Up   |

|             |                 |             |             |                 |                     |                 |                 |          |
|-------------|-----------------|-------------|-------------|-----------------|---------------------|-----------------|-----------------|----------|
| DEFB4<br>A  | 12.347<br>66346 | 0.975908839 | 23.71941808 | 24.304<br>95261 | 4.603178<br>416     | 0.0011<br>83975 | 0.0283<br>35987 | Up       |
| DEFB5       | 31.344<br>90711 | 0.687184831 | 62.00262938 | 90.227<br>00526 | 6.495487<br>397     | 1.76E-<br>08    | 6.12E-<br>06    | Up       |
| DEGS2       | 122.44<br>09046 | 8.496588042 | 236.3852212 | 27.821<br>19364 | 4.798112<br>413     | 0.0003<br>99335 | 0.0135<br>91702 | Up       |
| DENND<br>1C | 298.60<br>55329 | 184.1171991 | 413.0938666 | 2.2436<br>46268 | 1.165845<br>239     | 0.0251<br>14515 | 0.2075<br>31254 | Up       |
| DENND<br>2A | 554.89<br>64969 | 946.7442817 | 163.0487121 | 0.1722<br>20435 | -<br>2.537671<br>76 | 4.05E-<br>07    | 7.07E-<br>05    | Dow<br>n |
| DENND<br>6B | 773.12<br>53979 | 489.8726242 | 1056.378172 | 2.1564<br>34386 | 1.108647<br>82      | 0.0179<br>35036 | 0.1719<br>98999 | Up       |
| DEPDC<br>1  | 64.402<br>39903 | 103.8215089 | 24.98328916 | 0.2406<br>3693  | -<br>2.055070<br>03 | 0.0033<br>82367 | 0.0567<br>57696 | Dow<br>n |
| DEPDC<br>7  | 141.51<br>83124 | 62.07157744 | 220.9650473 | 3.5598<br>42627 | 1.831813<br>464     | 0.0023<br>01935 | 0.0439<br>90209 | Up       |
| DERL3       | 237.33<br>00025 | 71.39790399 | 403.262101  | 5.6480<br>94389 | 2.497764<br>199     | 0.0005<br>71115 | 0.0170<br>00563 | Up       |
| DES         | 67529.<br>70736 | 134337.0345 | 722.3801901 | 0.0053<br>77372 | -<br>7.538883<br>04 | 0.0005<br>54504 | 0.0165<br>98835 | Dow<br>n |
| DFNB3<br>1  | 98.317<br>71769 | 55.56178744 | 141.0736479 | 2.5390<br>40849 | 1.344283<br>606     | 0.0150<br>75008 | 0.1549<br>50462 | Up       |
| DGAT2       | 440.69<br>87278 | 855.111775  | 26.28568068 | 0.0307<br>39468 | -<br>5.023764<br>01 | 0.0026<br>43291 | 0.0478<br>25802 | Dow<br>n |
| DGKG        | 125.49<br>89382 | 236.6525835 | 14.34529295 | 0.0606<br>17521 | -<br>4.044121<br>34 | 0.0108<br>64649 | 0.1248<br>32737 | Dow<br>n |
| DGKH        | 107.32<br>46105 | 147.2916502 | 67.35757077 | 0.4573<br>07462 | -<br>1.128763<br>63 | 0.0341<br>1913  | 0.2479<br>75419 | Dow<br>n |
| DHH         | 28.227<br>06857 | 45.11830753 | 11.33582961 | 0.2512<br>46783 | -<br>1.992822<br>97 | 0.0146<br>59626 | 0.1520<br>66696 | Dow<br>n |
| DHRS1<br>3  | 160.11<br>93099 | 80.265461   | 239.9731588 | 2.9897<br>43731 | 1.580021<br>827     | 0.0058<br>96505 | 0.0828<br>99168 | Up       |
| DIAPH<br>2  | 19.622<br>91984 | 35.29380355 | 3.952036129 | 0.1119<br>75353 | -<br>3.158746<br>87 | 0.0011<br>63124 | 0.0280<br>50257 | Dow<br>n |
| DIAPH<br>3  | 119.05<br>76478 | 195.8923667 | 42.22292896 | 0.2155<br>41471 | -<br>2.213962       | 0.0373<br>97889 | 0.2618<br>11915 | Dow<br>n |

|            |                 |             |             |                 |                     |                 |                 |      |
|------------|-----------------|-------------|-------------|-----------------|---------------------|-----------------|-----------------|------|
|            |                 |             |             |                 | 62                  |                 |                 |      |
| DIO1       | 31.605<br>66506 | 5.638542108 | 57.57278801 | 10.210<br>58048 | 3.351992<br>982     | 0.0067<br>76147 | 0.0908<br>80984 | Up   |
| DIRAS3     | 136.46<br>67618 | 64.42398844 | 208.5095351 | 3.2365<br>20125 | 1.694443<br>475     | 0.0100<br>74354 | 0.1189<br>34074 | Up   |
| DKK2       | 106.11<br>72704 | 174.693431  | 37.54110974 | 0.2148<br>97089 | -<br>2.218282<br>16 | 0.0186<br>32901 | 0.1760<br>11696 | Down |
| DKK3       | 2009.3<br>34409 | 3465.893774 | 552.7750445 | 0.1594<br>89898 | -<br>2.648463<br>05 | 0.0173<br>82821 | 0.1685<br>67011 | Down |
| DLC1       | 1038.2<br>44496 | 1779.416883 | 297.072109  | 0.1669<br>49135 | -<br>2.582519<br>48 | 1.13E-<br>07    | 2.72E-<br>05    | Down |
| DLGAP<br>5 | 84.579<br>09728 | 120.837251  | 48.32094353 | 0.3998<br>84499 | -<br>1.322344<br>74 | 0.0451<br>54875 | 0.2889<br>49555 | Down |
| DLK1       | 385.05<br>9268  | 81.04841003 | 689.070126  | 8.5019<br>57358 | 3.087795<br>023     | 0.0003<br>46367 | 0.0123<br>97044 | Up   |
| DLK2       | 248.46<br>94487 | 116.5067345 | 380.4321629 | 3.2653<br>2337  | 1.707225<br>871     | 0.0249<br>7269  | 0.2069<br>76693 | Up   |
| DMGD<br>H  | 724.03<br>24485 | 46.7036023  | 1401.361295 | 30.005<br>42197 | 4.907151<br>314     | 1.02E-<br>05    | 0.0008<br>62487 | Up   |
| DMP1       | 22.957<br>33447 | 2.592548787 | 43.32212015 | 16.710<br>24297 | 4.062660<br>806     | 5.02E-<br>05    | 0.0030<br>39353 | Up   |
| DMPK       | 3941.1<br>18135 | 7548.93455  | 333.3017199 | 0.0441<br>52154 | -<br>4.501372<br>37 | 0.0031<br>0505  | 0.0534<br>97612 | Down |
| DMRT2      | 432.53<br>91816 | 704.3687213 | 160.7096418 | 0.2281<br>61241 | -<br>2.131874<br>36 | 0.0020<br>35903 | 0.0404<br>79788 | Down |
| DMRTA<br>1 | 29.492<br>07936 | 4.120546284 | 54.86361244 | 13.314<br>64536 | 3.734942<br>097     | 0.0002<br>60977 | 0.0100<br>59308 | Up   |
| DMTN       | 53.597<br>62832 | 81.05047909 | 26.14477756 | 0.3225<br>74004 | -<br>1.632297<br>92 | 0.0073<br>07485 | 0.0953<br>83295 | Down |
| DMXL2      | 226.61<br>71896 | 357.2056386 | 96.02874066 | 0.2688<br>33216 | -<br>1.895216<br>69 | 0.0002<br>79788 | 0.0106<br>03142 | Down |
| DNAAF<br>3 | 42.745<br>1046  | 11.21996801 | 74.2702412  | 6.6194<br>69961 | 2.726715<br>701     | 0.0199<br>69872 | 0.1835<br>18446 | Up   |
| DNAH1      | 137.66<br>82813 | 222.7321762 | 52.60438644 | 0.2361<br>7776  | -<br>2.082054<br>98 | 0.0066<br>35547 | 0.0897<br>29111 | Down |

|         |             |             |             |             |             |             |             |      |
|---------|-------------|-------------|-------------|-------------|-------------|-------------|-------------|------|
| DNAH10  | 26.81797818 | 6.936833696 | 46.69912266 | 6.73205164  | 2.751046243 | 0.001146061 | 0.027798168 | Up   |
| DNAH7   | 26.70575158 | 12.60476955 | 40.80673362 | 3.237404179 | 1.694837492 | 0.03590114  | 0.254367895 | Up   |
| DNAJB5  | 313.2207521 | 552.4522834 | 73.98922082 | 0.133928708 | -2.90046285 | 0.015406882 | 0.156665588 | Down |
| DNAJC6  | 118.6535025 | 40.81852491 | 196.4884801 | 4.813708494 | 2.267148778 | 6.90E-05    | 0.003889413 | Up   |
| DNAL1   | 69.35059473 | 103.4797712 | 35.22141831 | 0.340370083 | -1.55482386 | 0.03263796  | 0.242527832 | Down |
| DNER    | 150.2943133 | 76.17820527 | 224.4104214 | 2.945861229 | 1.558689471 | 0.009099538 | 0.110929669 | Up   |
| DNM1    | 1232.573414 | 1925.144894 | 540.0019347 | 0.280499373 | -1.83393055 | 0.047881396 | 0.298559455 | Down |
| DNM3    | 185.537323  | 280.9392955 | 90.13535054 | 0.320835682 | -1.64009349 | 0.001666422 | 0.035692935 | Down |
| DOCK2   | 287.2412972 | 182.7287749 | 391.7538195 | 2.143908751 | 1.100243503 | 0.024776477 | 0.206344811 | Up   |
| DOCK5   | 487.5360224 | 295.799042  | 679.2730027 | 2.296400279 | 1.199374136 | 0.01524008  | 0.155859894 | Up   |
| DPF1    | 22.71556588 | 35.56054177 | 9.870589992 | 0.277571418 | -1.84906908 | 0.039677891 | 0.26919383  | Down |
| DPT     | 3630.004343 | 6779.199284 | 480.8094015 | 0.070924217 | -3.81757787 | 9.59E-05    | 0.004885361 | Down |
| DPY19L2 | 34.47552164 | 64.35111535 | 4.599927941 | 0.071481713 | -3.80628199 | 0.023717619 | 0.201148155 | Down |
| DPY19L3 | 88.45110703 | 126.0021332 | 50.90008086 | 0.403962057 | -1.30770831 | 0.024972683 | 0.206976693 | Down |
| DPYSL3  | 4747.103355 | 7610.54432  | 1883.66239  | 0.247506921 | -2.01445923 | 0.018047942 | 0.172622923 | Down |
| DRC1    | 24.49037677 | 4.936429797 | 44.04432374 | 8.922303273 | 3.157416187 | 0.033461189 | 0.245303316 | Up   |
| DRP2    | 14.7470145  | 25.96470222 | 3.529326773 | 0.135927874 | -2.87908676 | 0.009783617 | 0.116569796 | Down |

|              |                 |             |             |                 |                     |                 |                 |          |
|--------------|-----------------|-------------|-------------|-----------------|---------------------|-----------------|-----------------|----------|
| DSCA<br>ML1  | 18.604<br>89205 | 4.523272101 | 32.686512   | 7.2262<br>97969 | 2.853256<br>744     | 0.0054<br>52449 | 0.0785<br>59686 | Up       |
| DSE          | 668.90<br>0766  | 1049.606653 | 288.1948792 | 0.2745<br>74174 | -<br>1.864732<br>16 | 0.0004<br>16744 | 0.0138<br>95847 | Dow<br>n |
| DSEL         | 820.23<br>4818  | 1339.992387 | 300.4772491 | 0.2242<br>38027 | -<br>2.156897<br>14 | 0.0259<br>29608 | 0.2113<br>62042 | Dow<br>n |
| DSG2         | 906.30<br>9728  | 292.125345  | 1520.494111 | 5.2049<br>37323 | 2.379880<br>791     | 9.87E-<br>07    | 0.0001<br>47102 | Up       |
| DSG3         | 139.66<br>32281 | 54.62056029 | 224.7058959 | 4.1139<br>43445 | 2.040521<br>961     | 0.0002<br>54669 | 0.0099<br>14059 | Up       |
| DSP          | 5326.8<br>53035 | 1764.771944 | 8888.934125 | 5.0368<br>74115 | 2.332528<br>675     | 0.0005<br>8995  | 0.0173<br>89071 | Up       |
| DST          | 7723.5<br>9618  | 10722.77423 | 4724.41813  | 0.4405<br>96624 | -<br>1.182469<br>65 | 0.0188<br>18388 | 0.1769<br>88997 | Dow<br>n |
| DSTN         | 8931.1<br>62748 | 15391.37942 | 2470.946073 | 0.1605<br>40911 | -<br>2.638987<br>11 | 0.0256<br>63659 | 0.2101<br>4378  | Dow<br>n |
| DTL          | 107.55<br>31227 | 166.8967176 | 48.20952775 | 0.2888<br>58454 | -<br>1.791565<br>38 | 0.0021<br>40911 | 0.0417<br>51232 | Dow<br>n |
| DTNB         | 792.32<br>12013 | 475.4988358 | 1109.143567 | 2.3325<br>89448 | 1.221932<br>405     | 0.0108<br>13974 | 0.1243<br>66846 | Up       |
| DUSP1<br>8   | 128.30<br>44855 | 200.4882068 | 56.12076417 | 0.2799<br>20525 | -<br>1.836910<br>82 | 0.0011<br>26364 | 0.0274<br>50006 | Dow<br>n |
| DUSP2<br>2   | 218.39<br>04474 | 124.8861838 | 311.8947109 | 2.4974<br>31672 | 1.320445<br>207     | 0.0069<br>48993 | 0.0925<br>69328 | Up       |
| DYNC1<br>LI2 | 986.28<br>44975 | 1346.928655 | 625.6403401 | 0.4644<br>94046 | -<br>1.106267<br>99 | 0.0130<br>22478 | 0.1410<br>29279 | Dow<br>n |
| DYRK3        | 222.31<br>80042 | 327.3366077 | 117.2994007 | 0.3583<br>4489  | -<br>1.480579<br>31 | 0.0213<br>06215 | 0.1894<br>24749 | Dow<br>n |
| DZIP1        | 926.75<br>52945 | 1450.169644 | 403.3409449 | 0.2781<br>33628 | -<br>1.846149<br>91 | 0.0310<br>56468 | 0.2360<br>01279 | Dow<br>n |
| EBF1         | 891.55<br>7579  | 1442.659944 | 340.4552137 | 0.2359<br>91312 | -<br>2.083194<br>34 | 1.54E-<br>05    | 0.0012<br>05123 | Dow<br>n |
| EBF2         | 227.20<br>54342 | 426.2038727 | 28.20699578 | 0.0661<br>81932 | -<br>3.917418       | 0.0226<br>83935 | 0.1964<br>4527  | Dow<br>n |

|             |                 |             |             |                 |                     |                 |                 |          |
|-------------|-----------------|-------------|-------------|-----------------|---------------------|-----------------|-----------------|----------|
|             |                 |             |             |                 | 78                  |                 |                 |          |
| ECE2        | 382.70<br>34589 | 540.9718967 | 224.4350212 | 0.4148<br>73716 | -<br>1.269255<br>83 | 0.0399<br>10161 | 0.2697<br>41247 | Dow<br>n |
| ECEL1       | 13.496<br>51315 | 26.3361014  | 0.656924908 | 0.0249<br>43893 | -<br>5.325169<br>52 | 0.0037<br>22619 | 0.0602<br>8036  | Dow<br>n |
| ECM1        | 5064.0<br>42004 | 9219.906742 | 908.177267  | 0.0985<br>01784 | -<br>3.343706<br>33 | 0.0080<br>8555  | 0.1025<br>70491 | Dow<br>n |
| ECM2        | 7078.2<br>1794  | 12559.64119 | 1596.794693 | 0.1271<br>36967 | -<br>2.975544<br>51 | 0.0005<br>28048 | 0.0160<br>90311 | Dow<br>n |
| ECSCR       | 911.78<br>0553  | 1324.063793 | 499.4973129 | 0.3772<br>45655 | -<br>1.406423<br>81 | 0.0052<br>76934 | 0.0769<br>52798 | Dow<br>n |
| ECT2        | 173.17<br>97214 | 242.6165401 | 103.7429027 | 0.4276<br>00289 | -<br>1.225665<br>27 | 0.0232<br>19618 | 0.1989<br>82752 | Dow<br>n |
| EDAR        | 287.34<br>96594 | 37.68919561 | 537.0101232 | 14.248<br>38377 | 3.832726<br>375     | 0.0066<br>59142 | 0.0899<br>13375 | Up       |
| EDARA<br>DD | 11.749<br>35924 | 3.545230765 | 19.95348771 | 5.6282<br>62031 | 2.492689<br>497     | 0.0437<br>45229 | 0.2829<br>40187 | Up       |
| EDN1        | 525.76<br>81098 | 782.855469  | 268.6807506 | 0.3432<br>06072 | -<br>1.542853<br>02 | 0.0428<br>93515 | 0.2800<br>92554 | Dow<br>n |
| EFEMP<br>1  | 3411.0<br>51175 | 5504.668528 | 1317.433821 | 0.2393<br>30273 | -<br>2.062925<br>2  | 0.0071<br>39769 | 0.0939<br>41862 | Dow<br>n |
| EFEMP<br>2  | 2141.5<br>81247 | 3795.692266 | 487.4702284 | 0.1284<br>27226 | -<br>2.960977<br>02 | 0.0023<br>02054 | 0.0439<br>90209 | Dow<br>n |
| EFHB        | 104.19<br>45427 | 53.49489547 | 154.8941899 | 2.8954<br>94767 | 1.533809<br>889     | 0.0160<br>74115 | 0.1603<br>7664  | Up       |
| EFHC1       | 212.64<br>08832 | 94.32258018 | 330.9591861 | 3.5088<br>01238 | 1.810978<br>226     | 0.0011<br>87174 | 0.0283<br>64821 | Up       |
| EFNA4       | 209.55<br>99161 | 109.6737384 | 309.4460938 | 2.8215<br>14961 | 1.496469<br>999     | 0.0020<br>85256 | 0.0409<br>75964 | Up       |
| EGFL7       | 1109.3<br>62498 | 1511.835488 | 706.889509  | 0.4675<br>7039  | -<br>1.096744<br>52 | 0.0066<br>14865 | 0.0896<br>29795 | Dow<br>n |
| EHD1        | 1124.5<br>11945 | 1522.981739 | 726.0421507 | 0.4767<br>24134 | -<br>1.068773<br>43 | 0.0307<br>63638 | 0.2351<br>46301 | Dow<br>n |

|              |                 |             |             |                 |                     |                 |                 |          |
|--------------|-----------------|-------------|-------------|-----------------|---------------------|-----------------|-----------------|----------|
| EHD2         | 7900.6<br>9052  | 11052.48573 | 4748.895308 | 0.4296<br>67626 | -<br>1.218707<br>02 | 0.0026<br>02314 | 0.0473<br>21709 | Dow<br>n |
| EHD4         | 531.44<br>04291 | 732.8700669 | 330.0107913 | 0.4502<br>99182 | -<br>1.151044<br>24 | 0.0043<br>944   | 0.0678<br>10584 | Dow<br>n |
| EHF          | 11083.<br>81902 | 5483.633243 | 16684.0048  | 3.0425<br>09238 | 1.605261<br>644     | 0.0248<br>47398 | 0.2064<br>58874 | Up       |
| EID2         | 70.488<br>23998 | 100.9566723 | 40.01980762 | 0.3964<br>05772 | -<br>1.334950<br>13 | 0.0479<br>92227 | 0.2988<br>99472 | Dow<br>n |
| EIF4EB<br>P3 | 186.17<br>6245  | 114.3399944 | 258.0124956 | 2.2565<br>37591 | 1.174110<br>812     | 0.0400<br>28432 | 0.2700<br>28158 | Up       |
| EIF5A2       | 178.87<br>31941 | 251.7366428 | 106.0097454 | 0.4211<br>13685 | -<br>1.247718<br>33 | 0.0304<br>95158 | 0.2339<br>86452 | Dow<br>n |
| ELF3         | 492.54<br>93257 | 95.79623624 | 889.3024152 | 9.2832<br>70931 | 3.214633<br>224     | 1.58E-<br>05    | 0.0012<br>21067 | Up       |
| ELF4         | 1363.7<br>39032 | 2028.194942 | 699.2831219 | 0.3447<br>81021 | -<br>1.536247<br>74 | 0.0015<br>95753 | 0.0347<br>65455 | Dow<br>n |
| ELFN2        | 232.74<br>72593 | 108.2489612 | 357.2455573 | 3.3002<br>21576 | 1.722562<br>89      | 0.0451<br>33606 | 0.2889<br>15939 | Up       |
| ELK3         | 1458.4<br>6574  | 1962.37285  | 954.5586308 | 0.4864<br>30818 | -<br>1.039693<br>46 | 0.0428<br>05323 | 0.2796<br>68676 | Dow<br>n |
| ELMO3        | 860.08<br>3758  | 1269.29538  | 450.8721362 | 0.3552<br>1451  | -<br>1.493237<br>58 | 0.0018<br>61879 | 0.0380<br>36735 | Dow<br>n |
| ELN          | 54939.<br>70837 | 108024.7076 | 1854.709145 | 0.0171<br>69305 | -<br>5.864024<br>55 | 0.0060<br>18869 | 0.0841<br>66191 | Dow<br>n |
| ELOVL<br>5   | 1283.8<br>2427  | 292.1381275 | 2275.510412 | 7.7891<br>59299 | 2.961467<br>623     | 9.30E-<br>10    | 5.59E-<br>07    | Up       |
| EMILIN<br>2  | 1306.9<br>35888 | 2271.196865 | 342.6749105 | 0.1508<br>78559 | -<br>2.728540<br>29 | 4.50E-<br>08    | 1.23E-<br>05    | Dow<br>n |
| EML1         | 309.39<br>05863 | 524.8623817 | 93.91879084 | 0.1789<br>3984  | -<br>2.482453<br>46 | 1.33E-<br>06    | 0.0001<br>7894  | Dow<br>n |
| EML5         | 319.19<br>99746 | 209.2760259 | 429.1239233 | 2.0505<br>164   | 1.035987<br>283     | 0.0227<br>04286 | 0.1965<br>27165 | Up       |
| EMP1         | 7330.6<br>48243 | 11097.85562 | 3563.440863 | 0.3210<br>92739 | -<br>1.638938       | 0.0009<br>37209 | 0.0242<br>55835 | Dow<br>n |

|              |                 |             |             |                 |                     |                 |                 |          |
|--------------|-----------------|-------------|-------------|-----------------|---------------------|-----------------|-----------------|----------|
|              |                 |             |             |                 | 05                  |                 |                 |          |
| EMP3         | 1292.4<br>20113 | 2188.938861 | 395.901365  | 0.1808<br>64515 | -<br>2.467018<br>71 | 4.16E-<br>06    | 0.0004<br>35871 | Dow<br>n |
| EMX2         | 278.83<br>8745  | 537.5497701 | 20.1277198  | 0.0374<br>43453 | -<br>4.739142<br>69 | 0.0073<br>91174 | 0.0961<br>97248 | Dow<br>n |
| EN1          | 68.851<br>95069 | 130.0430778 | 7.660823609 | 0.0589<br>09892 | -<br>4.085346<br>29 | 0.0088<br>47101 | 0.1091<br>60641 | Dow<br>n |
| ENDOD<br>1   | 797.31<br>76879 | 1100.788582 | 493.8467933 | 0.4486<br>3001  | -<br>1.156401<br>96 | 0.0167<br>91712 | 0.1646<br>3984  | Dow<br>n |
| ENO1         | 10868.<br>54486 | 14723.53494 | 7013.554776 | 0.4763<br>49926 | -<br>1.069906<br>33 | 0.0301<br>93567 | 0.2323<br>64233 | Dow<br>n |
| ENOX1        | 97.840<br>25655 | 158.5373643 | 37.14314877 | 0.2342<br>86403 | -<br>2.093654<br>87 | 0.0014<br>70958 | 0.0327<br>58779 | Dow<br>n |
| ENPP1        | 6365.1<br>25693 | 12225.69263 | 504.5587595 | 0.0412<br>70362 | -<br>4.598750<br>1  | 0.0064<br>94638 | 0.0886<br>20856 | Dow<br>n |
| ENPP3        | 309.91<br>50218 | 24.95597652 | 594.8740671 | 23.836<br>93808 | 4.575127<br>024     | 0.0253<br>70926 | 0.2087<br>51475 | Up       |
| ENPP5        | 1028.5<br>86898 | 345.114947  | 1712.05885  | 4.9608<br>3657  | 2.310583<br>43      | 9.95E-<br>07    | 0.0001<br>4711  | Up       |
| ENTPD<br>2   | 1096.6<br>95039 | 610.0255575 | 1583.364521 | 2.5955<br>70795 | 1.376051<br>838     | 0.0374<br>01702 | 0.2618<br>11915 | Up       |
| ENTPD<br>3   | 31.398<br>61105 | 11.54192055 | 51.25530155 | 4.4407<br>94869 | 2.150817<br>931     | 0.0089<br>19823 | 0.1097<br>57632 | Up       |
| EPAS1        | 2092.6<br>42554 | 2905.537335 | 1279.747774 | 0.4404<br>51327 | -<br>1.182945<br>5  | 0.0090<br>67173 | 0.1106<br>64907 | Dow<br>n |
| EPB41L<br>2  | 2786.8<br>64062 | 3850.561186 | 1723.166939 | 0.4475<br>10598 | -<br>1.160006<br>25 | 0.0156<br>83943 | 0.1581<br>00954 | Dow<br>n |
| EPB41L<br>4B | 374.60<br>84854 | 231.6645763 | 517.5523945 | 2.2340<br>59271 | 1.159667<br>462     | 0.0292<br>52003 | 0.2280<br>36683 | Up       |
| EPCAM        | 2516.6<br>67973 | 672.2908044 | 4361.045141 | 6.4868<br>43361 | 2.697516<br>602     | 1.29E-<br>07    | 3.00E-<br>05    | Up       |
| EPDR1        | 458.37<br>61687 | 766.7662322 | 149.9861051 | 0.1956<br>08647 | -<br>2.353957<br>95 | 0.0029<br>69608 | 0.0520<br>76522 | Dow<br>n |
| EPHA1        | 369.45          | 107.8638261 | 631.0396172 | 5.8503          | 2.548519            | 2.86E-          | 5.61E-          | Up       |



|        |                 |             |             |                 |                     |                 |                 |          |
|--------|-----------------|-------------|-------------|-----------------|---------------------|-----------------|-----------------|----------|
|        | 17217           |             |             | 3593            | 467                 | 07              | 05              |          |
| EPHA3  | 198.71<br>37469 | 383.4615765 | 13.96591729 | 0.0364<br>20643 | -<br>4.779099<br>79 | 6.94E-<br>08    | 1.79E-<br>05    | Dow<br>n |
| EPHA4  | 23.487<br>15784 | 38.47233034 | 8.501985331 | 0.2209<br>89611 | -<br>2.177949<br>54 | 0.0466<br>30587 | 0.2940<br>12292 | Dow<br>n |
| EPHA5  | 134.78<br>13834 | 72.24447187 | 197.318295  | 2.7312<br>58044 | 1.449565<br>624     | 0.0197<br>35391 | 0.1822<br>8711  | Up       |
| EPHA7  | 242.71<br>45726 | 131.7328353 | 353.6963098 | 2.6849<br>51773 | 1.424896<br>175     | 0.0055<br>47361 | 0.0792<br>10362 | Up       |
| EPHB1  | 61.816<br>47606 | 110.0568972 | 13.57605495 | 0.1233<br>54876 | -<br>3.019113<br>35 | 0.0035<br>55584 | 0.0586<br>48091 | Dow<br>n |
| EPHB2  | 155.15<br>7034  | 229.8963527 | 80.41771539 | 0.3497<br>99875 | -<br>1.515398<br>32 | 0.0411<br>23062 | 0.2738<br>34966 | Dow<br>n |
| EPHB6  | 595.85<br>53815 | 73.4155304  | 1118.295233 | 15.232<br>40691 | 3.929072<br>019     | 0.0002<br>12953 | 0.0087<br>50456 | Up       |
| EPHX1  | 1237.0<br>11117 | 776.851716  | 1697.170517 | 2.1846<br>77568 | 1.127420<br>371     | 0.0209<br>68489 | 0.1884<br>01543 | Up       |
| EPHX2  | 423.83<br>48095 | 279.3662415 | 568.3033775 | 2.0342<br>59309 | 1.024503<br>593     | 0.0348<br>24287 | 0.2508<br>7672  | Up       |
| EPN3   | 172.72<br>74604 | 83.4799911  | 261.9749297 | 3.1381<br>76301 | 1.649926<br>405     | 0.0022<br>33591 | 0.0432<br>77926 | Up       |
| EPPK1  | 222.95<br>70098 | 125.2633507 | 320.6506688 | 2.5598<br>12324 | 1.356038<br>041     | 0.0096<br>89711 | 0.1156<br>14855 | Up       |
| EPS8L1 | 479.47<br>63095 | 136.7574588 | 822.1951601 | 6.0120<br>68133 | 2.587861<br>359     | 2.63E-<br>07    | 5.21E-<br>05    | Up       |
| EPS8L2 | 346.27<br>06514 | 222.6384717 | 469.902831  | 2.1106<br>09309 | 1.077659<br>549     | 0.0189<br>85594 | 0.1780<br>04743 | Up       |
| ERBB2  | 2883.2<br>68155 | 1535.992283 | 4230.544027 | 2.7542<br>74272 | 1.461672<br>231     | 0.0203<br>60739 | 0.1851<br>24679 | Up       |
| ERBB3  | 3329.2<br>40039 | 780.1351008 | 5878.344976 | 7.5350<br>34599 | 2.913614<br>136     | 0.0005<br>68729 | 0.0169<br>57531 | Up       |
| ERBB4  | 74.210<br>21945 | 23.42968132 | 124.9907576 | 5.3347<br>18637 | 2.415412<br>183     | 0.0001<br>23978 | 0.0059<br>32207 | Up       |
| EREG   | 20.339<br>96471 | 3.012103975 | 37.66782545 | 12.505<br>48645 | 3.644489<br>273     | 0.0196<br>09617 | 0.1816<br>83552 | Up       |
| ERICH3 | 106.49<br>26525 | 165.8577624 | 47.12754259 | 0.2841<br>44329 | -<br>1.815304<br>17 | 0.0074<br>50191 | 0.0966<br>86325 | Dow<br>n |
| ERN2   | 117.74<br>18472 | 8.755687697 | 226.7280066 | 25.894<br>93989 | 4.694598<br>304     | 7.72E-<br>05    | 0.0041<br>45252 | Up       |

|             |                 |             |             |                 |                     |                 |                 |      |
|-------------|-----------------|-------------|-------------|-----------------|---------------------|-----------------|-----------------|------|
| ESRP1       | 787.55<br>88892 | 366.0097285 | 1209.10805  | 3.3034<br>86098 | 1.723989<br>273     | 0.0020<br>95336 | 0.0410<br>84536 | Up   |
| ESRRB       | 241.89<br>88558 | 30.70273422 | 453.0949775 | 14.757<br>47972 | 3.883374<br>454     | 1.91E-<br>10    | 1.53E-<br>07    | Up   |
| ESRRG       | 397.45<br>1446  | 99.25644727 | 695.6464446 | 7.0085<br>76911 | 2.809121<br>535     | 0.0134<br>28874 | 0.1436<br>3758  | Up   |
| ESYT2       | 4801.7<br>95839 | 6419.424071 | 3184.167607 | 0.4960<br>2076  | -<br>1.011527<br>59 | 0.0381<br>26697 | 0.2629<br>59243 | Down |
| ESYT3       | 21.868<br>90049 | 3.500909539 | 40.23689145 | 11.493<br>26796 | 3.522717<br>163     | 0.0004<br>58014 | 0.0147<br>01266 | Up   |
| ETNK2       | 474.40<br>01467 | 173.9899044 | 774.810389  | 4.4531<br>91647 | 2.154839<br>701     | 9.24E-<br>06    | 0.0007<br>97644 | Up   |
| ETV4        | 180.17<br>52368 | 93.42617253 | 266.9243012 | 2.8570<br>61292 | 1.514531<br>986     | 0.0339<br>10722 | 0.2475<br>18604 | Up   |
| ETV5        | 420.82<br>35823 | 236.0173353 | 605.6298293 | 2.5660<br>39603 | 1.359543<br>436     | 0.0497<br>51724 | 0.3049<br>20735 | Up   |
| EVC         | 407.68<br>37362 | 614.7865722 | 200.5809002 | 0.3262<br>6103  | -<br>1.615901<br>42 | 0.0028<br>15124 | 0.0503<br>29061 | Down |
| EXOC3<br>L4 | 96.111<br>82172 | 30.80716456 | 161.4164789 | 5.2395<br>75961 | 2.389450<br>059     | 6.94E-<br>05    | 0.0038<br>98165 | Up   |
| EXOSC<br>5  | 316.93<br>62209 | 197.2228653 | 436.6495764 | 2.2139<br>90634 | 1.146649<br>119     | 0.0295<br>85554 | 0.2295<br>24443 | Up   |
| EXTL2       | 205.87<br>80714 | 341.8964755 | 69.85966722 | 0.2043<br>29884 | -<br>2.291027<br>88 | 0.0024<br>18327 | 0.0454<br>89269 | Down |
| EYA2        | 173.44<br>70314 | 46.49409934 | 300.3999635 | 6.4610<br>34148 | 2.691765<br>1       | 5.43E-<br>06    | 0.0005<br>26737 | Up   |
| EZR         | 7191.1<br>16915 | 4428.130832 | 9954.102999 | 2.2479<br>24322 | 1.168593<br>467     | 0.0118<br>91114 | 0.1328<br>59517 | Up   |
| F13A1       | 847.23<br>17522 | 1459.156257 | 235.3072473 | 0.1612<br>62542 | -<br>2.632516<br>73 | 0.0300<br>08586 | 0.2315<br>33309 | Down |
| FAIM        | 253.16<br>58289 | 117.0942708 | 389.2373871 | 3.3241<br>36906 | 1.732979<br>801     | 0.0013<br>71291 | 0.0312<br>22959 | Up   |
| FAIM2       | 147.16<br>93451 | 69.8579844  | 224.4807058 | 3.2133<br>86526 | 1.684094<br>527     | 0.0031<br>88211 | 0.0547<br>21356 | Up   |
| FAM10<br>2B | 704.57<br>47907 | 1015.407107 | 393.7424747 | 0.3877<br>6809  | -<br>1.366734<br>01 | 0.0021<br>91163 | 0.0425<br>93099 | Down |
| FAM10<br>5A | 2139.2<br>08819 | 3633.804577 | 644.6130612 | 0.1773<br>93431 | -<br>2.494975<br>51 | 0.0180<br>12502 | 0.1724<br>66834 | Down |

|              |                 |             |             |                 |                     |                 |                 |          |
|--------------|-----------------|-------------|-------------|-----------------|---------------------|-----------------|-----------------|----------|
| FAM10<br>9B  | 563.53<br>5999  | 952.3832526 | 174.6887454 | 0.1834<br>2274  | -<br>2.446755<br>59 | 9.68E-<br>06    | 0.0008<br>28197 | Dow<br>n |
| FAM11<br>0A  | 368.81<br>64012 | 152.2390241 | 585.3937783 | 3.8452<br>28132 | 1.943069<br>194     | 0.0001<br>06521 | 0.0052<br>93459 | Up       |
| FAM11<br>0D  | 217.61<br>22346 | 318.4487736 | 116.7756956 | 0.3667<br>01665 | -<br>1.447321<br>28 | 0.0069<br>90159 | 0.0927<br>17262 | Dow<br>n |
| FAM12<br>4A  | 17.312<br>26747 | 31.99444725 | 2.630087685 | 0.0822<br>04505 | -<br>3.604638<br>74 | 0.0017<br>9839  | 0.0371<br>11403 | Dow<br>n |
| FAM12<br>6A  | 859.84<br>69435 | 1209.937338 | 509.756549  | 0.4213<br>08222 | -<br>1.247052<br>02 | 0.0058<br>46035 | 0.0824<br>06531 | Dow<br>n |
| FAM13<br>1C  | 41.023<br>97166 | 7.001819079 | 75.04612424 | 10.718<br>0896  | 3.421975<br>876     | 0.0004<br>26561 | 0.0141<br>70797 | Up       |
| FAM13<br>2B  | 7.2864<br>91761 | 13.8694024  | 0.703581125 | 0.0507<br>29015 | -<br>4.301045<br>04 | 0.0336<br>32368 | 0.2460<br>23638 | Dow<br>n |
| FAM14<br>9A  | 254.84<br>23256 | 151.4377245 | 358.2469267 | 2.3656<br>38601 | 1.242229<br>69      | 0.0063<br>11501 | 0.0870<br>43708 | Up       |
| FAM15<br>9B  | 24.922<br>73863 | 0.309818372 | 49.53565888 | 159.88<br>61247 | 7.320900<br>933     | 0.0432<br>61815 | 0.2817<br>3281  | Up       |
| FAM16<br>0A1 | 687.84<br>41292 | 331.5692076 | 1044.119051 | 3.1490<br>2297  | 1.654904<br>281     | 0.0062<br>62507 | 0.0865<br>00274 | Up       |
| FAM16<br>0B1 | 219.57<br>16073 | 304.9012803 | 134.2419343 | 0.4402<br>79996 | -<br>1.183506<br>8  | 0.0149<br>42727 | 0.1541<br>17698 | Dow<br>n |
| FAM16<br>3A  | 14.572<br>82463 | 3.279733618 | 25.86591564 | 7.8865<br>90392 | 2.979401<br>715     | 0.0067<br>16052 | 0.0904<br>11086 | Up       |
| FAM16<br>7B  | 62.835<br>76088 | 91.41171404 | 34.25980772 | 0.3747<br>85749 | -<br>1.415862       | 0.0300<br>76969 | 0.2317<br>64993 | Dow<br>n |
| FAM17<br>1A1 | 875.59<br>32122 | 1176.736441 | 574.4499838 | 0.4881<br>72172 | -<br>1.034538<br>04 | 0.0295<br>97032 | 0.2295<br>24443 | Dow<br>n |
| FAM17<br>4B  | 382.51<br>17827 | 240.0164843 | 525.0070811 | 2.1873<br>79266 | 1.129203<br>388     | 0.0240<br>57912 | 0.2032<br>69633 | Up       |
| FAM18<br>0B  | 173.48<br>60773 | 342.4164947 | 4.555659777 | 0.0133<br>0444  | -<br>6.231948<br>38 | 0.0001<br>39916 | 0.0064<br>71652 | Dow<br>n |
| FAM18<br>4A  | 78.145<br>19956 | 30.32366547 | 125.9667336 | 4.1540<br>7345  | 2.054526<br>725     | 0.0125<br>06634 | 0.1372<br>45698 | Up       |
| FAM18<br>4B  | 153.14<br>46792 | 41.22317116 | 265.0661873 | 6.4300<br>2903  | 2.684825<br>251     | 0.0315<br>87484 | 0.2381<br>50572 | Up       |

|              |                 |             |             |                 |                     |                 |                 |      |
|--------------|-----------------|-------------|-------------|-----------------|---------------------|-----------------|-----------------|------|
| FAM18<br>9A2 | 580.69<br>18074 | 229.8871512 | 931.4964636 | 4.0519<br>72713 | 2.018624<br>459     | 7.15E-<br>05    | 0.0039<br>67823 | Up   |
| FAM19<br>3B  | 1156.0<br>45993 | 757.8733946 | 1554.218592 | 2.0507<br>62836 | 1.036160<br>659     | 0.0179<br>81264 | 0.1722<br>59171 | Up   |
| FAM19<br>5A  | 325.69<br>74509 | 156.3037943 | 495.0911074 | 3.1674<br>92571 | 1.663341<br>236     | 0.0012<br>09952 | 0.0287<br>94634 | Up   |
| FAM19<br>6B  | 8.6996<br>74008 | 16.12976636 | 1.269581652 | 0.0787<br>1048  | -<br>3.667300<br>45 | 0.0179<br>76409 | 0.1722<br>59171 | Down |
| FAM19<br>8B  | 281.49<br>42235 | 432.3525022 | 130.6359449 | 0.3021<br>51472 | -<br>1.726656<br>13 | 0.0045<br>3352  | 0.0693<br>17803 | Down |
| FAM20<br>C   | 4579.8<br>1204  | 2313.4289   | 6846.19518  | 2.9593<br>28112 | 1.565269<br>663     | 0.0480<br>35344 | 0.2988<br>99472 | Up   |
| FAM21<br>3A  | 1011.1<br>04272 | 650.6181303 | 1371.590413 | 2.1081<br>34325 | 1.075966<br>795     | 0.0232<br>32314 | 0.1989<br>9147  | Up   |
| FAM26<br>F   | 57.282<br>76934 | 21.2106642  | 93.35487447 | 4.4013<br>17827 | 2.137935<br>555     | 0.0011<br>84397 | 0.0283<br>35987 | Up   |
| FAM3B        | 515.75<br>52484 | 48.4610751  | 983.0494216 | 20.285<br>34075 | 4.342365<br>632     | 0.0003<br>17572 | 0.0116<br>67369 | Up   |
| FAM3C        | 1028.8<br>66423 | 1417.399037 | 640.3338087 | 0.4517<br>66787 | -<br>1.146349<br>88 | 0.0200<br>36442 | 0.1837<br>02003 | Down |
| FAM43<br>A   | 799.69<br>44089 | 1067.680314 | 531.7085041 | 0.4980<br>03473 | -<br>1.005772<br>29 | 0.0250<br>32361 | 0.2071<br>37045 | Down |
| FAM46<br>B   | 491.18<br>73885 | 826.8680712 | 155.5067057 | 0.1880<br>67131 | -<br>2.410680<br>37 | 0.0064<br>45063 | 0.0880<br>81407 | Down |
| FAM64<br>A   | 96.099<br>98829 | 140.9942756 | 51.20570101 | 0.3631<br>75745 | -<br>1.461260<br>24 | 0.0167<br>93464 | 0.1646<br>3984  | Down |
| FAM69<br>A   | 329.12<br>73896 | 525.4223581 | 132.8324212 | 0.2528<br>10751 | -<br>1.983870<br>28 | 0.0001<br>41248 | 0.0064<br>85021 | Down |
| FAM73<br>A   | 340.08<br>14687 | 553.4875055 | 126.6754319 | 0.2288<br>67735 | -<br>2.127414       | 0.0003<br>08162 | 0.0114<br>38123 | Down |
| FAM83<br>B   | 32.706<br>61169 | 13.17495966 | 52.23826371 | 3.9649<br>65742 | 1.987308<br>401     | 0.0149<br>81197 | 0.1544<br>26179 | Up   |
| FAM83<br>D   | 134.94<br>68151 | 229.5938852 | 40.29974492 | 0.1755<br>26212 | -<br>2.510241<br>61 | 0.0456<br>01143 | 0.2901<br>58384 | Down |
| FAM83<br>G   | 142.03<br>30642 | 68.28627695 | 215.7798514 | 3.1599<br>29946 | 1.659892<br>575     | 0.0019<br>38618 | 0.0391<br>1715  | Up   |

|            |                 |             |             |                 |                     |                 |                 |          |
|------------|-----------------|-------------|-------------|-----------------|---------------------|-----------------|-----------------|----------|
| FAM83<br>H | 907.43<br>17685 | 409.4314198 | 1405.432117 | 3.4326<br>43537 | 1.779320<br>048     | 0.0002<br>38665 | 0.0095<br>6686  | Up       |
| FAM84<br>A | 499.72<br>01556 | 175.1647418 | 824.2755694 | 4.7057<br>16236 | 2.234414<br>326     | 0.0047<br>64891 | 0.0720<br>48501 | Up       |
| FAM8A<br>1 | 211.32<br>56391 | 292.0058848 | 130.6453933 | 0.4474<br>06714 | -<br>1.160341<br>19 | 0.0167<br>39039 | 0.1644<br>63792 | Dow<br>n |
| FANK1      | 38.812<br>18593 | 17.23777847 | 60.38659339 | 3.5031<br>54047 | 1.808654<br>43      | 0.0388<br>58194 | 0.2656<br>16885 | Up       |
| FAP        | 534.98<br>80752 | 937.5038374 | 132.4723129 | 0.1413<br>03222 | -<br>2.823133<br>73 | 0.0015<br>07587 | 0.0332<br>96592 | Dow<br>n |
| FAR2       | 200.13<br>426   | 312.7437374 | 87.52478263 | 0.2798<br>61024 | -<br>1.837217<br>52 | 0.0108<br>85652 | 0.1249<br>94445 | Dow<br>n |
| FAT1       | 2978.5<br>51284 | 4314.827263 | 1642.275306 | 0.3806<br>12063 | -<br>1.393606<br>81 | 0.0109<br>70778 | 0.1256<br>3867  | Dow<br>n |
| FAT2       | 530.28<br>04669 | 199.9739121 | 860.5870217 | 4.3034<br>96454 | 2.105509<br>28      | 0.0193<br>1274  | 0.1798<br>56749 | Up       |
| FAT3       | 125.19<br>79495 | 249.1296399 | 1.266259131 | 0.0050<br>82732 | -<br>7.620180<br>19 | 0.0161<br>27454 | 0.1607<br>31019 | Dow<br>n |
| FAT4       | 1259.5<br>03187 | 2001.477037 | 517.5293369 | 0.2585<br>73707 | -<br>1.951352<br>51 | 0.0002<br>36859 | 0.0095<br>37283 | Dow<br>n |
| FBLN1      | 11207.<br>82252 | 18329.27427 | 4086.370778 | 0.2229<br>42312 | -<br>2.165257<br>65 | 4.08E-<br>06    | 0.0004<br>30547 | Dow<br>n |
| FBLN2      | 7958.6<br>55049 | 13372.12632 | 2545.183778 | 0.1903<br>35009 | -<br>2.393387<br>15 | 0.0011<br>16416 | 0.0273<br>62813 | Dow<br>n |
| FBLN5      | 2436.6<br>34052 | 3583.364284 | 1289.90382  | 0.3599<br>7005  | -<br>1.474051<br>22 | 0.0017<br>56977 | 0.0367<br>06729 | Dow<br>n |
| FBN1       | 25575.<br>22948 | 48392.37508 | 2758.083886 | 0.0569<br>94183 | -<br>4.133041<br>51 | 8.46E-<br>05    | 0.0044<br>29597 | Dow<br>n |
| FBN3       | 37.035<br>49732 | 8.357226874 | 65.71376776 | 7.8631<br>06836 | 2.975099<br>456     | 0.0249<br>78561 | 0.2069<br>76693 | Up       |
| FBXL2<br>2 | 254.53<br>39096 | 459.6648906 | 49.4029287  | 0.1074<br>75967 | -<br>3.217914       | 0.0220<br>10586 | 0.1929<br>29521 | Dow<br>n |
| FBXL7      | 754.69<br>27282 | 1154.397835 | 354.9876212 | 0.3075<br>08911 | -<br>1.701299       | 0.0006<br>12912 | 0.0177<br>83061 | Dow<br>n |

|            |                 |             |             |                 |                     |                 |                 |          |
|------------|-----------------|-------------|-------------|-----------------|---------------------|-----------------|-----------------|----------|
|            |                 |             |             |                 | 88                  |                 |                 |          |
| FBXL8      | 80.567<br>87589 | 120.8236512 | 40.31210054 | 0.3336<br>44118 | -<br>1.583618<br>03 | 0.0157<br>63054 | 0.1584<br>12102 | Dow<br>n |
| FBXO1<br>6 | 34.774<br>80979 | 16.59448465 | 52.95513492 | 3.1911<br>2862  | 1.674066<br>758     | 0.0375<br>01066 | 0.2623<br>03892 | Up       |
| FBXO1<br>7 | 122.22<br>75984 | 177.2409172 | 67.2142796  | 0.3792<br>25523 | -<br>1.398872<br>03 | 0.0107<br>07337 | 0.1237<br>758   | Dow<br>n |
| FBXO2<br>8 | 237.28<br>41929 | 360.9230844 | 113.6453015 | 0.3148<br>74017 | -<br>1.667153<br>38 | 0.0017<br>77675 | 0.0368<br>45281 | Dow<br>n |
| FBXO3<br>0 | 398.98<br>84916 | 629.8217698 | 168.1552134 | 0.2669<br>8857  | -<br>1.905150<br>12 | 0.0013<br>88151 | 0.0314<br>58359 | Dow<br>n |
| FBXW9      | 173.93<br>03681 | 100.329329  | 247.5314073 | 2.4671<br>88906 | 1.302868<br>183     | 0.0078<br>66427 | 0.1008<br>21561 | Up       |
| FCER1<br>A | 42.701<br>515   | 66.03790316 | 19.36512684 | 0.2932<br>42606 | -<br>1.769833<br>36 | 0.0179<br>24282 | 0.1719<br>98999 | Dow<br>n |
| FCGR2<br>A | 188.35<br>75894 | 277.1495319 | 99.56564695 | 0.3592<br>48837 | -<br>1.476944<br>61 | 0.0030<br>38596 | 0.0527<br>55762 | Dow<br>n |
| FCHO1      | 119.99<br>13559 | 57.84022186 | 182.1424899 | 3.1490<br>62782 | 1.654922<br>52      | 0.0040<br>98135 | 0.0648<br>47586 | Up       |
| FCHO2      | 76.093<br>30009 | 110.5320598 | 41.65454038 | 0.3768<br>54828 | -<br>1.407919<br>22 | 0.0392<br>42258 | 0.2674<br>31466 | Dow<br>n |
| FER        | 611.31<br>99795 | 858.4113583 | 364.2286008 | 0.4243<br>0543  | -<br>1.236824<br>95 | 0.0158<br>11818 | 0.1587<br>24846 | Dow<br>n |
| FERMT<br>2 | 3660.8<br>87358 | 6015.652515 | 1306.1222   | 0.2171<br>20619 | -<br>2.203431<br>35 | 0.0025<br>30348 | 0.0467<br>19492 | Dow<br>n |
| FEZ1       | 129.65<br>46542 | 218.3035943 | 41.0057141  | 0.1878<br>38016 | -<br>2.412439<br>02 | 0.0460<br>15651 | 0.2915<br>61756 | Dow<br>n |
| FEZ2       | 749.05<br>19057 | 1002.809845 | 495.2939667 | 0.4939<br>06167 | -<br>1.017691<br>11 | 0.0353<br>79205 | 0.2528<br>42381 | Dow<br>n |
| FGD5       | 1182.8<br>19816 | 1672.386844 | 693.2527885 | 0.4145<br>28966 | -<br>1.270455<br>18 | 0.0036<br>9518  | 0.0599<br>97611 | Dow<br>n |
| FGF10      | 20.856          | 35.55609572 | 6.156091937 | 0.1731          | -                   | 0.0377          | 0.2625          | Dow      |

|         |                 |             |             |                 |                     |                 |                 |          |
|---------|-----------------|-------------|-------------|-----------------|---------------------|-----------------|-----------------|----------|
|         | 09383           |             |             | 37455           | 2.530010<br>23      | 89456           | 90135           | n        |
| FGF13   | 216.79<br>82882 | 309.6678021 | 123.9287742 | 0.4001<br>99095 | -<br>1.321210<br>19 | 0.0245<br>65391 | 0.2055<br>35751 | Dow<br>n |
| FGF16   | 13.217<br>70317 | 26.43540634 | 0           | 0               | #NAME<br>?          | 0.0009<br>80698 | 0.0250<br>6596  | Dow<br>n |
| FGF2    | 926.36<br>39908 | 1286.207834 | 566.5201477 | 0.4404<br>57703 | -<br>1.182924<br>61 | 0.0310<br>8833  | 0.2360<br>01279 | Dow<br>n |
| FGFR3   | 38.148<br>46382 | 12.03115632 | 64.26577133 | 5.3416<br>12195 | 2.417275<br>239     | 0.0011<br>46507 | 0.0277<br>98168 | Up       |
| FGFR4   | 149.39<br>97068 | 16.25740503 | 282.5420086 | 17.379<br>28089 | 4.119296<br>483     | 1.09E-<br>09    | 6.34E-<br>07    | Up       |
| FGL1    | 1358.7<br>01329 | 687.710338  | 2029.692321 | 2.9513<br>76777 | 1.561388<br>109     | 0.0006<br>40902 | 0.0183<br>31103 | Up       |
| FGL2    | 1617.9<br>9862  | 2810.595625 | 425.4016154 | 0.1513<br>56393 | -<br>2.723978<br>48 | 0.0199<br>22595 | 0.1833<br>71577 | Dow<br>n |
| FHDC1   | 307.54<br>5698  | 428.2522023 | 186.8391938 | 0.4362<br>83089 | -<br>1.196663<br>54 | 0.0297<br>88144 | 0.2303<br>25043 | Dow<br>n |
| FHL1    | 9368.8<br>18195 | 17092.69323 | 1644.943161 | 0.0962<br>36628 | -<br>3.377270<br>1  | 0.0003<br>96103 | 0.0135<br>3277  | Dow<br>n |
| FHL5    | 302.02<br>99358 | 490.1217952 | 113.9380763 | 0.2324<br>68904 | -<br>2.104890<br>35 | 0.0052<br>12168 | 0.0763<br>16805 | Dow<br>n |
| FHOD3   | 335.47<br>846   | 493.1565287 | 177.8003913 | 0.3605<br>3541  | -<br>1.471787<br>13 | 0.0406<br>49465 | 0.2720<br>87459 | Dow<br>n |
| FIBIN   | 126.20<br>54747 | 210.3752015 | 42.03574783 | 0.1998<br>13227 | -<br>2.323276<br>01 | 0.0015<br>19043 | 0.0333<br>94    | Dow<br>n |
| FIGF    | 644.36<br>86455 | 1143.477718 | 145.2595729 | 0.1270<br>33147 | -<br>2.976723<br>1  | 0.0463<br>87671 | 0.2934<br>20711 | Dow<br>n |
| FILIP1  | 1048.3<br>9891  | 1456.425781 | 640.3720396 | 0.4396<br>87383 | -<br>1.185449<br>96 | 0.0087<br>79233 | 0.1086<br>68325 | Dow<br>n |
| FILIP1L | 3275.2<br>44604 | 5710.832624 | 839.6565838 | 0.1470<br>2875  | -<br>2.765829<br>8  | 0.0022<br>21145 | 0.0430<br>83052 | Dow<br>n |
| FKBP10  | 2471.8          | 4465.143524 | 478.5485895 | 0.1071          | -                   | 9.66E-          | 0.0049          | Dow      |

|        |                 |             |             |                 |                     |                 |                 |          |
|--------|-----------------|-------------|-------------|-----------------|---------------------|-----------------|-----------------|----------|
|        | 46056           |             |             | 74291           | 3.221969<br>23      | 05              | 09994           | n        |
| FKBP14 | 913.69<br>52956 | 1335.701042 | 491.689549  | 0.3681<br>13473 | -<br>1.441777<br>54 | 0.0009<br>15136 | 0.0237<br>86942 | Dow<br>n |
| FKBP4  | 6054.3<br>41678 | 2694.014077 | 9414.669279 | 3.4946<br>62244 | 1.805153<br>027     | 0.0045<br>38185 | 0.0693<br>17803 | Up       |
| FKBP7  | 864.30<br>9737  | 1546.40506  | 182.2144137 | 0.1178<br>30973 | -<br>3.085209<br>27 | 0.0011<br>97244 | 0.0285<br>29826 | Dow<br>n |
| FKBP9  | 3539.6<br>13579 | 5390.861888 | 1688.365271 | 0.3131<br>90229 | -<br>1.674888<br>89 | 0.0020<br>32343 | 0.0404<br>65151 | Dow<br>n |
| FKTN   | 51.887<br>50373 | 89.92379131 | 13.85121615 | 0.1540<br>32831 | -<br>2.698690<br>21 | 0.0007<br>45342 | 0.0206<br>53182 | Dow<br>n |
| FLNA   | 79341.<br>78512 | 138267.6938 | 20415.8764  | 0.1476<br>54711 | -<br>2.759700<br>71 | 0.0185<br>95668 | 0.1759<br>0312  | Dow<br>n |
| FLNC   | 9140.8<br>99024 | 17665.52396 | 616.2740917 | 0.0348<br>85696 | -<br>4.841220<br>59 | 0.0058<br>87388 | 0.0828<br>41329 | Dow<br>n |
| FLRT2  | 1579.1<br>70664 | 2659.804846 | 498.5364815 | 0.1874<br>33481 | -<br>2.415549<br>41 | 9.99E-<br>05    | 0.0049<br>78884 | Dow<br>n |
| FLT4   | 712.15<br>63956 | 1268.056605 | 156.2561867 | 0.1232<br>2493  | -<br>3.020633<br>93 | 2.81E-<br>06    | 0.0003<br>2469  | Dow<br>n |
| FMO1   | 121.27<br>496   | 7.299503282 | 235.2504167 | 32.228<br>27741 | 5.010255<br>174     | 0.0004<br>69538 | 0.0149<br>11959 | Up       |
| FMO4   | 597.94<br>06506 | 244.9514795 | 950.9298218 | 3.8821<br>15038 | 1.956842<br>87      | 0.0004<br>26206 | 0.0141<br>70797 | Up       |
| FMO5   | 1718.6<br>3593  | 659.5041563 | 2777.767704 | 4.2119<br>03257 | 2.074472<br>299     | 0.0001<br>59134 | 0.0071<br>05497 | Up       |
| FMOD   | 9190.1<br>19622 | 16239.47458 | 2140.764663 | 0.1318<br>24749 | -<br>2.923306<br>84 | 0.0092<br>42997 | 0.1119<br>76031 | Dow<br>n |
| FN1    | 87641.<br>78185 | 169039.4104 | 6244.153255 | 0.0369<br>39038 | -<br>4.758709<br>88 | 0.0015<br>1909  | 0.0333<br>94    | Dow<br>n |
| FNDC1  | 1322.7<br>26988 | 2617.231303 | 28.22267392 | 0.0107<br>83408 | -<br>6.535042<br>94 | 0.0247<br>45543 | 0.2063<br>44811 | Dow<br>n |
| FNDC3  | 2774.8          | 3917.114075 | 1632.624949 | 0.4167          | -                   | 0.0059          | 0.0831          | Dow      |



|            |                 |             |             |                 |                     |                 |                 |          |
|------------|-----------------|-------------|-------------|-----------------|---------------------|-----------------|-----------------|----------|
| B          | 69512           |             |             | 92802           | 1.262597<br>73      | 23008           | 47966           | n        |
| FOS        | 3524.3<br>21902 | 6673.450909 | 375.1928943 | 0.0562<br>21721 | -<br>4.152728<br>58 | 0.0210<br>49016 | 0.1884<br>3831  | Dow<br>n |
| FOSL2      | 4845.7<br>05975 | 7243.60097  | 2447.81098  | 0.3379<br>27364 | -<br>1.565214<br>92 | 0.0014<br>8051  | 0.0328<br>49838 | Dow<br>n |
| FOXA1      | 143.70<br>23826 | 12.47564066 | 274.9291244 | 22.037<br>27503 | 4.461873<br>937     | 4.68E-<br>07    | 8.04E-<br>05    | Up       |
| FOXA3      | 46.540<br>26155 | 5.452727218 | 87.62779589 | 16.070<br>45289 | 4.006338<br>682     | 0.0081<br>88042 | 0.1028<br>58007 | Up       |
| FOXF1      | 84.204<br>68638 | 134.8560533 | 33.55331942 | 0.2488<br>08404 | -<br>2.006892<br>88 | 0.0010<br>27876 | 0.0258<br>60337 | Dow<br>n |
| FOXI1      | 225.61<br>57048 | 36.55818725 | 414.6732224 | 11.342<br>82779 | 3.503708<br>447     | 0.0048<br>36678 | 0.0726<br>46817 | Up       |
| FOXJ1      | 48.917<br>50064 | 5.092190129 | 92.74281115 | 18.212<br>75498 | 4.186877<br>265     | 0.0062<br>83139 | 0.0867<br>18856 | Up       |
| FOXN1      | 17.907<br>88833 | 3.593816985 | 32.22195968 | 8.9659<br>43403 | 3.164455<br>392     | 0.0436<br>50483 | 0.2827<br>32876 | Up       |
| FOXN2      | 206.82<br>79981 | 329.8795302 | 83.77646594 | 0.2539<br>6079  | -<br>1.977322<br>33 | 4.08E-<br>05    | 0.0026<br>30672 | Dow<br>n |
| FOXP2      | 63.396<br>5519  | 113.4922101 | 13.30089376 | 0.1171<br>96535 | -<br>3.092998<br>18 | 0.0225<br>15194 | 0.1957<br>44636 | Dow<br>n |
| FOXP3      | 85.237<br>07961 | 36.12755791 | 134.3466013 | 3.7186<br>73751 | 1.894788<br>182     | 0.0032<br>24321 | 0.0550<br>13076 | Up       |
| FOXP4      | 1960.1<br>81478 | 1036.60329  | 2883.759667 | 2.7819<br>31811 | 1.476087<br>058     | 0.0230<br>86241 | 0.1982<br>16423 | Up       |
| FREM1      | 195.40<br>50983 | 86.21672778 | 304.5934687 | 3.5328<br>8134  | 1.820845<br>294     | 0.0075<br>63203 | 0.0979<br>41582 | Up       |
| FRMD4<br>A | 668.71<br>95655 | 1034.484222 | 302.9549087 | 0.2928<br>55997 | -<br>1.771736<br>66 | 0.0001<br>33652 | 0.0062<br>62185 | Dow<br>n |
| FRRS1      | 271.66<br>13261 | 62.49966262 | 480.8229896 | 7.6932<br>09362 | 2.943585<br>57      | 0.0003<br>00554 | 0.0112<br>01854 | Up       |
| FRY        | 1506.9<br>42669 | 2159.910626 | 853.9747116 | 0.3953<br>75022 | -<br>1.338706<br>36 | 0.0041<br>76117 | 0.0653<br>61438 | Dow<br>n |
| FSCN1      | 1989.7<br>05311 | 2683.099037 | 1296.311586 | 0.4831<br>39671 | -<br>1.049487<br>78 | 0.0208<br>08201 | 0.1878<br>61371 | Dow<br>n |

|            |                 |             |             |                 |                     |                 |                 |          |
|------------|-----------------|-------------|-------------|-----------------|---------------------|-----------------|-----------------|----------|
| FSD1L      | 79.835<br>7379  | 122.3064671 | 37.3650087  | 0.3055<br>03131 | -<br>1.710740<br>93 | 0.0194<br>75977 | 0.1808<br>16857 | Dow<br>n |
| FSTL1      | 17837.<br>0039  | 32278.57775 | 3395.43005  | 0.1051<br>91439 | -<br>3.248910<br>8  | 1.90E-<br>05    | 0.0014<br>3031  | Dow<br>n |
| FSTL3      | 804.35<br>47623 | 1419.893126 | 188.8163983 | 0.1329<br>79303 | -<br>2.910726<br>37 | 6.09E-<br>06    | 0.0005<br>77382 | Dow<br>n |
| FUT11      | 219.26<br>491   | 374.2065648 | 64.32325527 | 0.1718<br>92375 | -<br>2.540422<br>54 | 8.26E-<br>07    | 0.0001<br>31818 | Dow<br>n |
| FUT2       | 132.01<br>46533 | 14.87877038 | 249.1505362 | 16.745<br>37142 | 4.065690<br>471     | 0.0001<br>42465 | 0.0065<br>22676 | Up       |
| FUZ        | 133.52<br>08266 | 57.31755795 | 209.7240952 | 3.6589<br>85181 | 1.871443<br>573     | 0.0006<br>89286 | 0.0194<br>03829 | Up       |
| FXYD1      | 1125.8<br>88106 | 2020.069852 | 231.7063607 | 0.1147<br>02153 | -<br>3.124035<br>63 | 0.0006<br>65762 | 0.0189<br>20666 | Dow<br>n |
| FXYD3      | 120.42<br>10393 | 26.13305794 | 214.7090207 | 8.2159<br>92984 | 3.038434<br>95      | 0.0221<br>58228 | 0.1938<br>46887 | Up       |
| FXYD5      | 1163.9<br>86611 | 1709.358199 | 618.6150232 | 0.3618<br>99    | -<br>1.466340<br>97 | 0.0017<br>22545 | 0.0365<br>56461 | Dow<br>n |
| FXYD6      | 5350.6<br>38398 | 2705.259142 | 7996.017655 | 2.9557<br>30758 | 1.563514<br>858     | 0.0004<br>40751 | 0.0143<br>8558  | Up       |
| FYN        | 1012.5<br>42607 | 1397.845568 | 627.2396453 | 0.4487<br>18842 | -<br>1.156116<br>33 | 0.0184<br>26935 | 0.1751<br>33548 | Dow<br>n |
| FZD4       | 984.59<br>67151 | 1576.023965 | 393.1694653 | 0.2494<br>69217 | -<br>2.003066<br>29 | 0.0002<br>87665 | 0.0108<br>10824 | Dow<br>n |
| FZD7       | 663.34<br>56259 | 366.143774  | 960.5474777 | 2.6234<br>16117 | 1.391446<br>661     | 0.0136<br>2147  | 0.1447<br>84205 | Up       |
| FZD8       | 321.05<br>27512 | 446.1242634 | 195.981239  | 0.4392<br>97422 | -<br>1.186730<br>06 | 0.0330<br>73154 | 0.2436<br>12345 | Dow<br>n |
| GABPB<br>2 | 83.531<br>69442 | 125.7773221 | 41.28606675 | 0.3282<br>47303 | -<br>1.607144<br>94 | 0.0134<br>46597 | 0.1436<br>3758  | Dow<br>n |
| GABRB<br>1 | 6.4322<br>86086 | 12.67701284 | 0.187559335 | 0.0147<br>95231 | -<br>6.078723<br>95 | 0.0192<br>2876  | 0.1792<br>59742 | Dow<br>n |
| GABRP      | 82.055          | 26.35740783 | 137.7533807 | 5.2263          | 2.385807            | 0.0250          | 0.2075          | Up       |

|          |             |             |             |             |             |             |             |      |
|----------|-------------|-------------|-------------|-------------|-------------|-------------|-------------|------|
|          | 39425       |             |             | 62985       | 327         | 9627        | 31254       |      |
| GABRR2   | 20.19540625 | 3.330452335 | 37.06036017 | 11.12772574 | 3.476086863 | 0.013159848 | 0.141895095 | Up   |
| GAD2     | 7.202170969 | 0           | 14.40434194 | Inf         | Inf         | 0.002282546 | 0.043849669 | Up   |
| GADD45A  | 444.9693347 | 622.0793234 | 267.859346  | 0.430587123 | -1.21562292 | 0.014259145 | 0.149199949 | Down |
| GADD45G  | 1809.867062 | 3382.041973 | 237.6921508 | 0.070280663 | -3.8307284  | 1.38E-05    | 0.00109621  | Down |
| GADL1    | 62.0109995  | 123.8344397 | 0.187559335 | 0.001514598 | -9.36684981 | 0.016778609 | 0.16463984  | Down |
| GAL3S T2 | 6.735823579 | 0.333045233 | 13.13860192 | 39.44990231 | 5.301949822 | 0.007662826 | 0.098947548 | Up   |
| GAL3S T4 | 339.3607873 | 541.7028645 | 137.01871   | 0.252940715 | -1.98312881 | 0.027336285 | 0.218290946 | Down |
| GALC     | 352.7227988 | 194.4527065 | 510.992891  | 2.62785178  | 1.393883905 | 0.002468725 | 0.045910642 | Up   |
| GALNT15  | 181.123749  | 304.8139595 | 57.4335386  | 0.188421615 | -2.40796362 | 1.06E-06    | 0.000153074 | Down |
| GALNT16  | 2398.493958 | 4039.327705 | 757.6602116 | 0.18757087  | -2.4144923  | 8.17E-07    | 0.000131653 | Down |
| GALNT6   | 310.2717936 | 105.9184305 | 514.6251568 | 4.858693188 | 2.280568334 | 2.17E-06    | 0.000261423 | Up   |
| GALNT8   | 31.52768257 | 3.214318028 | 59.84104711 | 18.61702749 | 4.218550837 | 4.23E-05    | 0.002665579 | Up   |
| GALNT9   | 8.754380951 | 16.33581521 | 1.172946697 | 0.071802153 | -3.79982909 | 0.024186607 | 0.204014865 | Down |
| GAMT     | 498.4454956 | 299.1233399 | 697.7676512 | 2.332708813 | 1.22200623  | 0.016545375 | 0.163393505 | Up   |
| GAPDH    | 11013.18115 | 15590.38288 | 6435.979411 | 0.412817277 | -1.27642474 | 0.008575479 | 0.106758504 | Down |
| GAREM    | 328.3821741 | 204.7951792 | 451.969169  | 2.206932657 | 1.142042607 | 0.043425958 | 0.281987349 | Up   |
| GARNL3   | 287.9351673 | 148.6656717 | 427.2046629 | 2.873593198 | 1.52285584  | 0.037745809 | 0.26248907  | Up   |
| GAS1     | 1885.5      | 2936.524248 | 834.6228015 | 0.2842      | -           | 0.0305      | 0.2343      | Down |

|            |                 |             |             |                 |                     |                 |                 |          |
|------------|-----------------|-------------|-------------|-----------------|---------------------|-----------------|-----------------|----------|
|            | 73525           |             |             | 21321           | 1.814913<br>31      | 78243           | 24948           | n        |
| GAS2L<br>1 | 795.94<br>90239 | 1084.915983 | 506.9820653 | 0.4673<br>00762 | -<br>1.097576<br>71 | 0.0144<br>96988 | 0.1511<br>62522 | Dow<br>n |
| GAS6       | 5165.5<br>79435 | 7105.386176 | 3225.772695 | 0.4539<br>89778 | -<br>1.139268<br>28 | 0.0328<br>09006 | 0.2425<br>90527 | Dow<br>n |
| GAS7       | 882.89<br>24448 | 1383.09405  | 382.6908394 | 0.2766<br>91841 | -<br>1.853647<br>99 | 5.19E-<br>05    | 0.0031<br>13149 | Dow<br>n |
| GAT        | 7.8029<br>67598 | 13.76796496 | 1.837970233 | 0.1334<br>96144 | -<br>2.905130<br>02 | 0.0297<br>66378 | 0.2302<br>5544  | Dow<br>n |
| GATA2      | 185.42<br>27031 | 277.4392774 | 93.40612872 | 0.3366<br>72333 | -<br>1.570582<br>93 | 0.0013<br>72571 | 0.0312<br>22959 | Dow<br>n |
| GATA3      | 1911.4<br>04054 | 914.0840822 | 2908.724025 | 3.1821<br>18672 | 1.669987<br>639     | 0.0028<br>76024 | 0.0510<br>13374 | Up       |
| GATA5      | 64.161<br>55023 | 122.2103422 | 6.112758241 | 0.0500<br>18338 | -<br>4.321399<br>06 | 0.0357<br>67829 | 0.2540<br>21996 | Dow<br>n |
| GCGR       | 88.859<br>60015 | 9.524687282 | 168.194513  | 17.658<br>79635 | 4.142315<br>105     | 0.0028<br>51109 | 0.0507<br>21069 | Up       |
| GCKR       | 16.571<br>39259 | 2.308089773 | 30.83469541 | 13.359<br>40039 | 3.739783<br>351     | 0.0018<br>89252 | 0.0382<br>49401 | Up       |
| GCLC       | 653.84<br>29371 | 378.8862965 | 928.7995777 | 2.4513<br>93957 | 1.293602<br>355     | 0.0029<br>10983 | 0.0513<br>29115 | Up       |
| GCNT2      | 68.555<br>19239 | 103.5594534 | 33.55093137 | 0.3239<br>77486 | -<br>1.626034<br>53 | 0.0095<br>65671 | 0.1148<br>83585 | Dow<br>n |
| GDF1       | 97.459<br>8578  | 147.2419915 | 47.67772406 | 0.3238<br>0521  | -<br>1.626801<br>89 | 0.0056<br>20894 | 0.0798<br>3882  | Dow<br>n |
| GDF11      | 106.80<br>41496 | 185.0990057 | 28.50929341 | 0.1540<br>21861 | -<br>2.698792<br>96 | 0.0200<br>21853 | 0.1837<br>02003 | Dow<br>n |
| GDF6       | 31.448<br>47967 | 62.09674327 | 0.80021608  | 0.0128<br>86603 | -<br>6.277984<br>18 | 0.0041<br>7799  | 0.0653<br>61438 | Dow<br>n |
| GEM        | 2719.4<br>13231 | 4618.000249 | 820.8262127 | 0.1777<br>44948 | -<br>2.492119<br>54 | 0.0034<br>5859  | 0.0576<br>61278 | Dow<br>n |
| GFI1       | 55.421          | 30.2548453  | 80.5880687  | 2.6636          | 1.413400            | 0.0289          | 0.2264          | Up       |

|            |                 |             |             |                 |                     |                 |                 |      |
|------------|-----------------|-------------|-------------|-----------------|---------------------|-----------------|-----------------|------|
|            | 457             |             |             | 41737           | 051                 | 62095           | 63509           |      |
| GFPT1      | 379.52<br>21108 | 507.697091  | 251.3471307 | 0.4950<br>73017 | -<br>1.014286<br>77 | 0.0282<br>36479 | 0.2226<br>21437 | Down |
| GFPT2      | 1759.1<br>63628 | 3435.440025 | 82.88723157 | 0.0241<br>27108 | -<br>5.373201<br>21 | 1.53E-<br>08    | 5.62E-<br>06    | Down |
| GFRA1      | 210.42<br>09783 | 125.4451622 | 295.3967945 | 2.3547<br>88254 | 1.235597<br>336     | 0.0115<br>80989 | 0.1303<br>24052 | Up   |
| GFRA4      | 2575.3<br>60131 | 4195.829875 | 954.8903863 | 0.2275<br>80816 | -<br>2.135549<br>15 | 0.0164<br>72166 | 0.1629<br>95833 | Down |
| GGT5       | 4208.5<br>22415 | 2346.199471 | 6070.845359 | 2.5875<br>23113 | 1.371571<br>75      | 0.0346<br>15771 | 0.2497<br>73561 | Up   |
| GGT6       | 189.13<br>69774 | 63.47128793 | 314.8026668 | 4.9597<br>64913 | 2.310271<br>74      | 0.0050<br>78831 | 0.0753<br>42949 | Up   |
| GIMAP<br>1 | 182.85<br>29117 | 107.5443928 | 258.1614307 | 2.4005<br>10376 | 1.263341<br>172     | 0.0241<br>63957 | 0.2039<br>74553 | Up   |
| GIMAP<br>4 | 303.58<br>72088 | 162.863068  | 444.3113496 | 2.7281<br>28328 | 1.447911<br>509     | 0.0017<br>61192 | 0.0367<br>28491 | Up   |
| GIMAP<br>5 | 136.49<br>87557 | 76.46109958 | 196.5364118 | 2.5704<br>10482 | 1.361998<br>769     | 0.0150<br>37842 | 0.1548<br>33126 | Up   |
| GIMAP<br>6 | 396.66<br>40067 | 209.7411309 | 583.5868825 | 2.7824<br>15065 | 1.476337<br>649     | 0.0032<br>03399 | 0.0549<br>29763 | Up   |
| GIMAP<br>7 | 1419.4<br>23031 | 786.7986042 | 2052.047458 | 2.6080<br>97481 | 1.382997<br>793     | 0.0023<br>83121 | 0.0450<br>91696 | Up   |
| GIMAP<br>8 | 763.25<br>84673 | 475.842243  | 1050.674691 | 2.2080<br>31563 | 1.142760<br>795     | 0.0135<br>66593 | 0.1444<br>67397 | Up   |
| GIPC3      | 70.427<br>98415 | 127.9244826 | 12.93148566 | 0.1010<br>86871 | -<br>3.306332<br>46 | 0.0252<br>33246 | 0.2081<br>31016 | Down |
| GJA1       | 5716.5<br>18886 | 10878.45103 | 554.5867384 | 0.0509<br>80304 | -<br>4.293916<br>22 | 0.0286<br>47896 | 0.2251<br>76205 | Down |
| GJB1       | 130.55<br>23261 | 23.05805154 | 238.0466007 | 10.323<br>79516 | 3.367901<br>516     | 0.0004<br>99191 | 0.0155<br>52519 | Up   |
| GJB3       | 28.106<br>81812 | 12.20801102 | 44.00562523 | 3.6046<br>51501 | 1.849859<br>786     | 0.0319<br>29637 | 0.2396<br>91518 | Up   |
| GJC1       | 466.65<br>61239 | 740.8369741 | 192.4752737 | 0.2598<br>07867 | -<br>1.944482<br>98 | 0.0003<br>88232 | 0.0133<br>57214 | Down |
| GLA        | 170.18<br>20296 | 237.3266066 | 103.0374526 | 0.4341<br>58875 | -<br>1.203705<br>02 | 0.0328<br>13398 | 0.2425<br>90527 | Down |

|         |             |             |             |             |             |             |             |      |
|---------|-------------|-------------|-------------|-------------|-------------|-------------|-------------|------|
| GLB1L2  | 67.2662634  | 36.40968483 | 98.12284197 | 2.694965431 | 1.430266767 | 0.0167129   | 0.164299865 | Up   |
| GLI1    | 25.34874493 | 44.0744204  | 6.623069456 | 0.150270143 | -2.7343697  | 0.005847351 | 0.082406531 | Down |
| GLI3    | 1162.254659 | 1704.946694 | 619.5626245 | 0.3633912   | -1.46040461 | 0.026056276 | 0.21209125  | Down |
| GLIPR2  | 1160.274587 | 1643.967823 | 676.5813515 | 0.411553889 | -1.28084674 | 0.00185744  | 0.03803219  | Down |
| GLIS2   | 1077.143101 | 1513.751432 | 640.5347696 | 0.423143956 | -1.24077953 | 0.013822999 | 0.145866049 | Down |
| GLP1R   | 149.8597258 | 21.79940451 | 277.920047  | 12.74897426 | 3.672309273 | 0.015653425 | 0.158100954 | Up   |
| GLRX5   | 897.251549  | 529.3369888 | 1265.166109 | 2.390095792 | 1.25706844  | 0.005543206 | 0.079210362 | Up   |
| GLS     | 1720.764521 | 2718.941781 | 722.5872616 | 0.265760476 | -1.91180153 | 0.001621286 | 0.035067598 | Down |
| GLYAT   | 20.24613819 | 40.49227637 | 0           | 0           | #NAME?      | 3.16E-05    | 0.002154048 | Down |
| GLYATL2 | 5.422440997 | 0.333045233 | 10.51183676 | 31.56278999 | 4.980152833 | 0.021676507 | 0.191351941 | Up   |
| GLYCAM1 | 135247.0324 | 3005.460878 | 267488.6039 | 89.00086034 | 6.475747377 | 0.030677539 | 0.234786647 | Up   |
| GMDS    | 926.1096665 | 563.692165  | 1288.527168 | 2.285870282 | 1.192743536 | 0.026860447 | 0.215828776 | Up   |
| GNAL    | 210.9859381 | 138.4089041 | 283.5629721 | 2.048733597 | 1.034732399 | 0.032354563 | 0.241674517 | Up   |
| GNAQ    | 379.4357501 | 506.55802   | 252.3134802 | 0.49809394  | -1.00551023 | 0.028408173 | 0.223681816 | Down |
| GNB4    | 625.4414187 | 1107.034913 | 143.8479241 | 0.129939826 | -2.94408442 | 1.61E-06    | 0.000206207 | Down |
| GNB5    | 365.8705527 | 576.93583   | 154.8052754 | 0.268323213 | -1.89795623 | 0.000431261 | 0.014248211 | Down |
| GNG10   | 1515.984857 | 2056.685429 | 975.2842857 | 0.474201972 | -1.07642643 | 0.025857606 | 0.211009242 | Down |
| GNG11   | 1831.9      | 2757.237081 | 906.6579412 | 0.3288      | -           | 0.0201      | 0.1842      | Down |

|         |             |             |             |             |             |             |             |      |
|---------|-------------|-------------|-------------|-------------|-------------|-------------|-------------|------|
|         | 47511       |             |             | 2843        | 1.60459306  | 70141       | 27428       | n    |
| GNG12   | 152.2782499 | 237.6963655 | 66.86013429 | 0.281283789 | -1.82990169 | 0.000581457 | 0.017194924 | Down |
| GNG13   | 9.558784755 | 1.285727211 | 17.8318423  | 13.86907125 | 3.793799275 | 0.008152886 | 0.102696151 | Up   |
| GNG4    | 19.44170921 | 38.55495597 | 0.328462454 | 0.008519332 | -6.87504404 | 2.79E-05    | 0.001934391 | Down |
| GNMT    | 80.19169536 | 27.42343081 | 132.9599599 | 4.848407219 | 2.277510876 | 0.002528645 | 0.046719492 | Up   |
| GOLGA7B | 206.9804205 | 51.79304866 | 362.1677923 | 6.992594599 | 2.805827866 | 0.021174277 | 0.188810073 | Up   |
| GOLT1B  | 337.3600829 | 463.6523631 | 211.0678028 | 0.455228571 | -1.13533699 | 0.00932935  | 0.112645349 | Down |
| GPA33   | 145.1457115 | 47.37073425 | 242.9206888 | 5.128075227 | 2.358417426 | 0.018923446 | 0.177606681 | Up   |
| GPAT2   | 21.38364168 | 38.81856976 | 3.948713607 | 0.101722285 | -3.29729232 | 0.001541514 | 0.033787808 | Down |
| GPC6    | 39.39942642 | 74.33505192 | 4.463800929 | 0.060049745 | -4.05769806 | 0.000207785 | 0.008594854 | Down |
| GPD2    | 298.0724409 | 420.4696736 | 175.6752082 | 0.417807084 | -1.25909114 | 0.019764188 | 0.182424462 | Down |
| GPI     | 3170.770331 | 4256.56903  | 2084.971633 | 0.489824461 | -1.02966327 | 0.020093499 | 0.183899863 | Down |
| GPM6A   | 343.278033  | 650.814406  | 35.74165994 | 0.05491836  | -4.18656764 | 5.65E-05    | 0.003322515 | Down |
| GPM6B   | 1271.848284 | 1756.763364 | 786.9332038 | 0.447944908 | -1.15860679 | 0.017422372 | 0.168787421 | Down |
| GPR1    | 286.9029904 | 561.9065388 | 11.89944208 | 0.021176906 | -5.56136435 | 9.69E-06    | 0.000828197 | Down |
| GPR110  | 337.3236008 | 12.74370051 | 661.903501  | 51.9396623  | 5.698764729 | 0.042496697 | 0.278155996 | Up   |
| GPR133  | 1713.04337  | 3235.132396 | 190.9543447 | 0.059025202 | -4.082525   | 3.19E-06    | 0.00035726  | Down |

|            |                 |             |             |                 |                     |                 |                 |          |
|------------|-----------------|-------------|-------------|-----------------|---------------------|-----------------|-----------------|----------|
|            |                 |             |             |                 | 1                   |                 |                 |          |
| GPR153     | 896.85<br>51468 | 1414.128548 | 379.5817452 | 0.2684<br>20962 | -<br>1.897430<br>75 | 0.0002<br>16325 | 0.0088<br>48712 | Dow<br>n |
| GPR156     | 53.986<br>97515 | 79.84122915 | 28.13272116 | 0.3523<br>58317 | -<br>1.504884<br>83 | 0.0368<br>26262 | 0.2589<br>03274 | Dow<br>n |
| GPR162     | 71.942<br>50659 | 131.4295381 | 12.45547505 | 0.0947<br>69222 | -<br>3.399437<br>6  | 0.0029<br>07683 | 0.0513<br>2259  | Dow<br>n |
| GPR173     | 278.27<br>88273 | 453.1370141 | 103.4206405 | 0.2282<br>32603 | -<br>2.131423<br>2  | 0.0006<br>14161 | 0.0177<br>83061 | Dow<br>n |
| GPR174     | 336.01<br>42324 | 203.0248434 | 469.0036214 | 2.3100<br>79957 | 1.207942<br>787     | 0.0103<br>22527 | 0.1209<br>14327 | Up       |
| GPR63      | 429.42<br>81693 | 691.6331369 | 167.2232016 | 0.2417<br>80205 | -<br>2.048231<br>96 | 0.0128<br>53576 | 0.1400<br>15495 | Dow<br>n |
| GPR88      | 7.2883<br>64118 | 13.59134087 | 0.985387362 | 0.0725<br>01115 | -<br>3.785853<br>02 | 0.0356<br>04957 | 0.2534<br>8453  | Dow<br>n |
| GPR97      | 34.640<br>89471 | 65.47065641 | 3.81113301  | 0.0582<br>11315 | -<br>4.102556<br>58 | 0.0004<br>38962 | 0.0143<br>8558  | Dow<br>n |
| GPR98      | 1048.2<br>17349 | 306.1420568 | 1790.292641 | 5.8479<br>1472  | 2.547922<br>273     | 0.0247<br>89151 | 0.2063<br>4512  | Up       |
| GPRC5<br>A | 365.05<br>92456 | 671.324862  | 58.79362928 | 0.0875<br>78507 | -<br>3.513279<br>33 | 0.0091<br>3439  | 0.1112<br>58704 | Dow<br>n |
| GPRC5<br>C | 432.44<br>81018 | 246.1760315 | 618.7201721 | 2.5133<br>24179 | 1.329596<br>768     | 0.0115<br>00125 | 0.1296<br>56719 | Up       |
| GPRIN2     | 91.067<br>82794 | 33.22560242 | 148.9100535 | 4.4817<br>86412 | 2.164073<br>896     | 0.0005<br>10445 | 0.0157<br>74927 | Up       |
| GPX2       | 14.908<br>94614 | 2.329184137 | 27.48870814 | 11.801<br>8613  | 3.560942<br>504     | 0.0156<br>97962 | 0.1581<br>10294 | Up       |
| GPX3       | 9613.9<br>52856 | 18685.04887 | 542.856841  | 0.0290<br>53006 | -<br>5.105168<br>74 | 0.0051<br>51456 | 0.0759<br>65342 | Dow<br>n |
| GPX7       | 731.80<br>07212 | 1293.965719 | 169.6357235 | 0.1310<br>97541 | -<br>2.931287<br>47 | 0.0008<br>61827 | 0.0226<br>95616 | Dow<br>n |
| GRASP      | 262.63<br>31153 | 367.1334124 | 158.1328183 | 0.4307<br>23037 | -<br>1.215167<br>61 | 0.0175<br>56041 | 0.1697<br>17801 | Dow<br>n |



|            |                 |             |             |                 |                     |                 |                 |      |
|------------|-----------------|-------------|-------------|-----------------|---------------------|-----------------|-----------------|------|
| GRB7       | 398.06<br>06532 | 89.81480976 | 706.3064966 | 7.8640<br>31539 | 2.975269<br>108     | 1.55E-<br>06    | 0.0001<br>99969 | Up   |
| GREB1      | 1760.8<br>39618 | 3271.112705 | 250.5665314 | 0.0765<br>99785 | -<br>3.706515<br>84 | 0.0024<br>5666  | 0.0458<br>75455 | Down |
| GRHL1      | 1781.6<br>6474  | 965.2592756 | 2598.070204 | 2.6915<br>77558 | 1.428451<br>998     | 0.0188<br>9531  | 0.1775<br>27344 | Up   |
| GRHL2      | 730.13<br>81179 | 241.6782317 | 1218.598004 | 5.0422<br>33202 | 2.334062<br>844     | 1.24E-<br>06    | 0.0001<br>70906 | Up   |
| GRHL3      | 73.151<br>13441 | 32.29700772 | 114.0052611 | 3.5299<br>01658 | 1.819627<br>991     | 0.0041<br>45979 | 0.0652<br>61182 | Up   |
| GRIN1      | 69.934<br>83481 | 31.52075023 | 108.3489194 | 3.4373<br>83901 | 1.781310<br>987     | 0.0126<br>64359 | 0.1384<br>5598  | Up   |
| GRIN3<br>A | 15.812<br>83499 | 27.4394183  | 4.186251681 | 0.1525<br>63427 | -<br>2.712518<br>94 | 0.0106<br>06469 | 0.1228<br>32337 | Down |
| GRK5       | 1225.3<br>60486 | 1805.598682 | 645.1222894 | 0.3572<br>89965 | -<br>1.484832<br>7  | 0.0020<br>05486 | 0.0401<br>07492 | Down |
| GRM8       | 17.007<br>22701 | 32.32642    | 1.688034019 | 0.0522<br>18403 | -<br>4.259297<br>86 | 0.0400<br>22845 | 0.2700<br>28158 | Down |
| GRTP1      | 225.69<br>03766 | 137.7700193 | 313.6107338 | 2.2763<br>35123 | 1.186712<br>967     | 0.0373<br>65305 | 0.2617<br>60283 | Up   |
| GSAP       | 326.21<br>45411 | 179.051865  | 473.3772172 | 2.6437<br>99422 | 1.402612<br>728     | 0.0050<br>69939 | 0.0752<br>72939 | Up   |
| GSC        | 25.752<br>94098 | 43.03435558 | 8.47152637  | 0.1968<br>54961 | -<br>2.344795<br>03 | 0.0090<br>17469 | 0.1103<br>92717 | Down |
| GSDM<br>C  | 13.921<br>6677  | 0           | 27.84333541 | Inf             | Inf                 | 8.82E-<br>06    | 0.0007<br>74154 | Up   |
| GSN        | 41757.<br>20568 | 69645.81818 | 13868.59318 | 0.1991<br>30307 | -<br>2.328215<br>28 | 0.0081<br>64386 | 0.1027<br>03874 | Down |
| GSTA2      | 3.8561<br>15386 | 7.712230771 | 0           | 0               | #NAME<br>?          | 0.0484<br>00786 | 0.3001<br>38119 | Down |
| GSTA4      | 487.43<br>40268 | 676.8892147 | 297.978839  | 0.4402<br>18033 | -<br>1.183709<br>85 | 0.0311<br>10984 | 0.2360<br>01279 | Down |
| GSTT1      | 800.38<br>22696 | 480.7804125 | 1119.984127 | 2.3295<br>12804 | 1.220028<br>26      | 0.0498<br>42535 | 0.3049<br>20735 | Up   |
| GTDC1      | 227.56<br>15947 | 313.5850929 | 141.5380965 | 0.4513<br>54671 | -<br>1.147666<br>56 | 0.0290<br>40833 | 0.2269<br>79024 | Down |

|              |                 |             |             |                 |                     |                 |                 |      |
|--------------|-----------------|-------------|-------------|-----------------|---------------------|-----------------|-----------------|------|
| GTF2IR<br>D1 | 211.33<br>38946 | 123.4679232 | 299.199866  | 2.4233<br>00387 | 1.276973<br>249     | 0.0070<br>73234 | 0.0934<br>7551  | Up   |
| GTF3C<br>1   | 5133.5<br>83865 | 2178.706124 | 8088.461606 | 3.7125<br>06939 | 1.892393<br>723     | 0.0003<br>19473 | 0.0117<br>08991 | Up   |
| GTF3C<br>4   | 197.66<br>6394  | 282.4480695 | 112.8847184 | 0.3996<br>65392 | -<br>1.323135<br>44 | 0.0251<br>51804 | 0.2076<br>49151 | Down |
| GUCD1        | 1507.4<br>47883 | 964.8155551 | 2050.080212 | 2.1248<br>41584 | 1.087355<br>286     | 0.0418<br>19471 | 0.2760<br>84356 | Up   |
| GUCY1<br>B3  | 2111.9<br>57294 | 2825.53698  | 1398.377609 | 0.4949<br>06851 | -<br>1.014771<br>08 | 0.0323<br>30205 | 0.2415<br>92611 | Down |
| GUCY2<br>D   | 123.29<br>07718 | 46.8054204  | 199.7761233 | 4.2682<br>26234 | 2.093636<br>647     | 0.0209<br>95906 | 0.1884<br>01543 | Up   |
| GYG2         | 370.21<br>79113 | 556.785553  | 183.6502697 | 0.3298<br>40221 | -<br>1.600160<br>76 | 0.0026<br>30685 | 0.0477<br>41381 | Down |
| H2AFY<br>2   | 197.17<br>10368 | 119.6946888 | 274.6473848 | 2.2945<br>6618  | 1.198221<br>418     | 0.0116<br>23899 | 0.1307<br>25383 | Up   |
| HAND2        | 50.571<br>46046 | 97.5307684  | 3.612152526 | 0.0370<br>36031 | -<br>4.754926<br>71 | 0.0034<br>38619 | 0.0574<br>8772  | Down |
| HAPLN<br>3   | 432.12<br>33086 | 646.1126108 | 218.1340064 | 0.3376<br>09888 | -<br>1.566570<br>93 | 0.0007<br>82865 | 0.0212<br>0436  | Down |
| HAS1         | 15.365<br>2151  | 30.2144084  | 0.516021789 | 0.0170<br>78666 | -<br>5.871660<br>9  | 0.0358<br>96994 | 0.2543<br>67895 | Down |
| HCFC2        | 514.74<br>87984 | 687.1650617 | 342.3325351 | 0.4981<br>80938 | -<br>1.005258<br>27 | 0.0215<br>58636 | 0.1907<br>1834  | Down |
| HCN1         | 65.055<br>58546 | 129.2200305 | 0.89114046  | 0.0068<br>96303 | -<br>7.179961<br>16 | 0.0035<br>91851 | 0.0591<br>18063 | Down |
| HDAC1<br>0   | 787.32<br>23372 | 457.7508943 | 1116.89378  | 2.4399<br>59799 | 1.286857<br>378     | 0.0040<br>55193 | 0.0644<br>7387  | Up   |
| HDDC3        | 204.09<br>54611 | 134.1396558 | 274.0512664 | 2.0430<br>29443 | 1.030709<br>996     | 0.0355<br>77076 | 0.2534<br>8453  | Up   |
| HDGFR<br>P3  | 381.06<br>25619 | 532.7801566 | 229.3449672 | 0.4304<br>68298 | -<br>1.216021<br>1  | 0.0273<br>81566 | 0.2184<br>59116 | Down |
| HEATR<br>5A  | 1121.4<br>40575 | 1683.270677 | 559.6104732 | 0.3324<br>5424  | -<br>1.588772<br>32 | 0.0009<br>25237 | 0.0239<br>80387 | Down |

|              |                 |             |             |                 |                     |                 |                 |          |
|--------------|-----------------|-------------|-------------|-----------------|---------------------|-----------------|-----------------|----------|
| HEG1         | 2437.8<br>78965 | 3931.612959 | 944.1449705 | 0.2401<br>41891 | -<br>2.058041       | 4.07E-<br>06    | 0.0004<br>30547 | Dow<br>n |
| HENM<br>T1   | 51.819<br>24034 | 86.62402334 | 17.01445734 | 0.1964<br>17307 | -<br>2.348006<br>04 | 0.0239<br>88223 | 0.2028<br>70863 | Dow<br>n |
| HEPAC<br>AM  | 91.173<br>16698 | 49.5286193  | 132.8177147 | 2.6816<br>3572  | 1.423113<br>271     | 0.0141<br>64843 | 0.1483<br>85364 | Up       |
| HEPAC<br>AM2 | 876.33<br>02002 | 77.10804105 | 1675.552359 | 21.729<br>93032 | 4.441611<br>643     | 3.49E-<br>06    | 0.0003<br>83581 | Up       |
| HERC1        | 41.787<br>82549 | 63.60835407 | 19.96729691 | 0.3139<br>09976 | -<br>1.671577<br>22 | 0.0267<br>49662 | 0.2154<br>18369 | Dow<br>n |
| HGF          | 208.66<br>32362 | 331.7177763 | 85.60869614 | 0.2580<br>76902 | -<br>1.954127<br>07 | 0.0002<br>25912 | 0.0091<br>57809 | Dow<br>n |
| HGFAC        | 100.05<br>2658  | 53.81299469 | 146.2923214 | 2.7185<br>31504 | 1.442827<br>547     | 0.0160<br>2716  | 0.1600<br>85238 | Up       |
| HHAT         | 90.837<br>28598 | 49.68950504 | 131.9850669 | 2.6561<br>96048 | 1.409361<br>633     | 0.0168<br>52717 | 0.1649<br>26736 | Up       |
| HHIPL1       | 392.72<br>83029 | 686.6317478 | 98.82485805 | 0.1439<br>27015 | -<br>2.796590<br>68 | 3.10E-<br>08    | 9.33E-<br>06    | Dow<br>n |
| HIC1         | 272.52<br>40948 | 441.706296  | 103.3418936 | 0.2339<br>60653 | -<br>2.095662<br>17 | 3.25E-<br>05    | 0.0021<br>93601 | Dow<br>n |
| HIF3A        | 119.19<br>30451 | 225.7321538 | 12.65393641 | 0.0560<br>57306 | -<br>4.156953<br>78 | 0.0009<br>585   | 0.0247<br>00555 | Dow<br>n |
| HJURP        | 113.87<br>40578 | 157.5162368 | 70.23187872 | 0.4458<br>70725 | -<br>1.165302<br>62 | 0.0421<br>55444 | 0.2771<br>25457 | Dow<br>n |
| HKDC1        | 82.596<br>24873 | 40.94996736 | 124.2425301 | 3.0340<br>08037 | 1.601224<br>907     | 0.0479<br>57223 | 0.2988<br>5548  | Up       |
| HMCN1        | 842.50<br>85305 | 1469.55305  | 215.4640113 | 0.1466<br>18736 | -<br>2.769858<br>62 | 4.22E-<br>05    | 0.0026<br>65579 | Dow<br>n |
| HMGA<br>1    | 477.75<br>94671 | 226.155974  | 729.3629602 | 3.2250<br>4397  | 1.689318<br>83      | 0.0004<br>06809 | 0.0136<br>89126 | Up       |
| HOME<br>R2   | 429.72<br>45005 | 195.0949977 | 664.3540032 | 3.4052<br>84661 | 1.767775<br>404     | 0.0343<br>52646 | 0.2489<br>61254 | Up       |
| HOME<br>R3   | 572.80<br>38674 | 779.6922714 | 365.9154634 | 0.4693<br>07542 | -<br>1.091394<br>45 | 0.0379<br>59263 | 0.2626<br>37007 | Dow<br>n |
| HOOK1        | 331.32          | 174.8672511 | 487.7768868 | 2.7894          | 1.479961            | 0.0098          | 0.1168          | Up       |

|              |                 |             |             |                 |                     |                 |                 |          |
|--------------|-----------------|-------------|-------------|-----------------|---------------------|-----------------|-----------------|----------|
|              | 20689           |             |             | 12447           | 269                 | 26883           | 53752           |          |
| HOOK2        | 796.45<br>83238 | 340.0217916 | 1252.894856 | 3.6847<br>48704 | 1.881566<br>232     | 9.88E-<br>05    | 0.0049<br>78884 | Up       |
| HOXA1<br>1   | 15.656<br>40902 | 31.31281803 | 0           | 0               | #NAME<br>?          | 1.87E-<br>05    | 0.0014<br>1432  | Dow<br>n |
| HOXA1<br>3   | 7.9425<br>81991 | 15.88516398 | 0           | 0               | #NAME<br>?          | 0.0403<br>60531 | 0.2709<br>57801 | Dow<br>n |
| HOXB3        | 123.19<br>21123 | 174.187697  | 72.19652752 | 0.4144<br>7547  | -<br>1.270641<br>38 | 0.0385<br>70527 | 0.2647<br>54087 | Dow<br>n |
| HOXC1<br>0   | 197.31<br>7932  | 320.19877   | 74.43709391 | 0.2324<br>71517 | -<br>2.104874<br>13 | 0.0006<br>13402 | 0.0177<br>83061 | Dow<br>n |
| HOXC1<br>1   | 12.425<br>33924 | 22.92510639 | 1.925572092 | 0.0839<br>94031 | -<br>3.573569<br>39 | 0.0163<br>34225 | 0.1619<br>86301 | Dow<br>n |
| HOXC6        | 642.32<br>4305  | 957.229163  | 327.419447  | 0.3420<br>49177 | -<br>1.547724<br>34 | 0.0014<br>12878 | 0.0318<br>49714 | Dow<br>n |
| HOXC8        | 258.69<br>49289 | 424.4354066 | 92.95445114 | 0.2190<br>07297 | -<br>2.190949<br>16 | 0.0007<br>81984 | 0.0212<br>0436  | Dow<br>n |
| HOXD4        | 402.78<br>84377 | 612.7031139 | 192.8737614 | 0.3147<br>91548 | -<br>1.667531<br>29 | 0.0008<br>58316 | 0.0226<br>69336 | Dow<br>n |
| HOXD8        | 290.95<br>80077 | 435.2166334 | 146.6993821 | 0.3370<br>72094 | -<br>1.568870<br>9  | 0.0016<br>12326 | 0.0349<br>15671 | Dow<br>n |
| HPDL         | 30.265<br>03795 | 14.24847115 | 46.28160476 | 3.2481<br>80404 | 1.699631<br>762     | 0.0267<br>38889 | 0.2154<br>18369 | Up       |
| HPGDS        | 8.5773<br>54636 | 14.98827659 | 2.166432687 | 0.1445<br>41814 | -<br>2.790441<br>19 | 0.0297<br>5576  | 0.2302<br>5544  | Dow<br>n |
| HPN          | 2564.7<br>63096 | 824.2109448 | 4305.315248 | 5.2235<br>59909 | 2.385033<br>353     | 0.0039<br>80735 | 0.0637<br>73075 | Up       |
| HS3ST2       | 57.851<br>679   | 115.703358  | 0           | 0               | #NAME<br>?          | 1.90E-<br>05    | 0.0014<br>3031  | Dow<br>n |
| HS3ST6       | 87.324<br>17773 | 30.34434816 | 144.3040073 | 4.7555<br>48101 | 2.249611<br>629     | 0.0090<br>454   | 0.1105<br>48763 | Up       |
| HSD11<br>B1  | 104.86<br>9982  | 200.7048251 | 9.035138844 | 0.0450<br>17048 | -<br>4.473384<br>72 | 0.0005<br>51044 | 0.0165<br>94785 | Dow<br>n |
| HSD17<br>B11 | 514.03<br>11869 | 328.1543065 | 699.9080674 | 2.1328<br>62661 | 1.092791<br>071     | 0.0177<br>49657 | 0.1710<br>1194  | Up       |

|              |                 |             |             |                 |                     |                 |                 |          |
|--------------|-----------------|-------------|-------------|-----------------|---------------------|-----------------|-----------------|----------|
| HSD17<br>B14 | 75.121<br>65288 | 40.30287584 | 109.9404299 | 2.7278<br>55709 | 1.447767<br>334     | 0.0172<br>32014 | 0.1674<br>82917 | Up       |
| HSD3B<br>7   | 611.02<br>39691 | 818.3622449 | 403.6856933 | 0.4932<br>84845 | -<br>1.019507<br>13 | 0.0373<br>21692 | 0.2616<br>81546 | Dow<br>n |
| HSPA12<br>A  | 465.66<br>87624 | 687.9009857 | 243.4365392 | 0.3538<br>83109 | -<br>1.498655<br>19 | 0.0030<br>99023 | 0.0534<br>64611 | Dow<br>n |
| HSPA13       | 547.98<br>64846 | 763.3108568 | 332.6621124 | 0.4358<br>14727 | -<br>1.198213<br>15 | 0.0158<br>76284 | 0.1591<br>95264 | Dow<br>n |
| HSPA2        | 877.92<br>41571 | 1393.036717 | 362.8115968 | 0.2604<br>46543 | -<br>1.940940<br>81 | 0.0010<br>24323 | 0.0258<br>06935 | Dow<br>n |
| HSPA6        | 103.27<br>92533 | 35.24754943 | 171.3109571 | 4.8602<br>23189 | 2.281022<br>566     | 0.0024<br>50603 | 0.0458<br>46759 | Up       |
| HSPB6        | 3852.5<br>31866 | 7365.208886 | 339.854846  | 0.0461<br>43273 | -<br>4.437735<br>84 | 0.0021<br>09105 | 0.0412<br>20089 | Dow<br>n |
| HSPB7        | 320.10<br>0762  | 632.1698388 | 8.031685291 | 0.0127<br>04949 | -<br>6.298465<br>65 | 0.0015<br>47087 | 0.0338<br>68811 | Dow<br>n |
| HSPG2        | 29832.<br>68206 | 45537.31548 | 14128.04864 | 0.3102<br>52119 | -<br>1.688487<br>03 | 0.0003<br>20003 | 0.0117<br>08991 | Dow<br>n |
| HTR2A        | 100.60<br>10012 | 177.9405659 | 23.26143651 | 0.1307<br>25877 | -<br>2.935383<br>35 | 0.0035<br>85054 | 0.0590<br>60079 | Dow<br>n |
| HTRA1        | 7522.2<br>17098 | 11831.67008 | 3212.764115 | 0.2715<br>39359 | -<br>1.880766<br>76 | 0.0001<br>95934 | 0.0082<br>19649 | Dow<br>n |
| ID1          | 742.32<br>71785 | 1213.998004 | 270.656353  | 0.2229<br>46292 | -<br>2.165231<br>89 | 0.0038<br>76281 | 0.0623<br>76665 | Dow<br>n |
| ID2          | 1216.2<br>44808 | 1872.60671  | 559.8829052 | 0.2989<br>85848 | -<br>1.741850<br>9  | 0.0265<br>75747 | 0.2147<br>84904 | Dow<br>n |
| ID3          | 1635.3<br>04501 | 2645.723994 | 624.8850076 | 0.2361<br>86771 | -<br>2.081999<br>93 | 0.0001<br>77505 | 0.0076<br>42038 | Dow<br>n |
| IDH3A        | 807.38<br>76922 | 1161.249992 | 453.5253929 | 0.3905<br>49319 | -<br>1.356423<br>35 | 0.0104<br>80179 | 0.1221<br>26582 | Dow<br>n |
| IER3         | 677.77          | 1146.105634 | 209.4476213 | 0.1827          | -                   | 0.0227          | 0.1967          | Dow      |

|            |                 |             |             |                 |                     |                 |                 |      |
|------------|-----------------|-------------|-------------|-----------------|---------------------|-----------------|-----------------|------|
|            | 66278           |             |             | 47222           | 2.452078<br>62      | 43223           | 69787           | n    |
| IFI44      | 183.83<br>86788 | 110.1182598 | 257.5590977 | 2.3389<br>31782 | 1.225849<br>784     | 0.0105<br>8569  | 0.1228<br>32337 | Up   |
| IFI44L     | 633.14<br>38763 | 234.0649683 | 1032.222784 | 4.4099<br>84081 | 2.140773<br>448     | 3.88E-<br>05    | 0.0025<br>28054 | Up   |
| IFI6       | 483.64<br>35094 | 696.4119797 | 270.875039  | 0.3889<br>5804  | -<br>1.362313<br>56 | 0.0269<br>27173 | 0.2161<br>72351 | Down |
| IFNLR1     | 32.052<br>58352 | 9.43434254  | 54.6708245  | 5.7948<br>73809 | 2.534777<br>245     | 0.0017<br>53373 | 0.0367<br>06729 | Up   |
| IGF1       | 2250.2<br>63214 | 4122.632717 | 377.8937112 | 0.0916<br>63201 | -<br>3.447513<br>52 | 0.0009<br>01212 | 0.0235<br>26726 | Down |
| IGFALS     | 91.881<br>45307 | 145.7039428 | 38.05896331 | 0.2612<br>07505 | -<br>1.936731<br>75 | 0.0001<br>9337  | 0.0081<br>50018 | Down |
| IGFBP2     | 627.08<br>61452 | 1015.741716 | 238.4305744 | 0.2347<br>35436 | -<br>2.090892<br>45 | 0.0288<br>74932 | 0.2263<br>68928 | Down |
| IGFBP4     | 7576.5<br>40771 | 12617.49059 | 2535.590956 | 0.2009<br>58419 | -<br>2.315031<br>08 | 6.16E-<br>06    | 0.0005<br>78459 | Down |
| IGFBP5     | 8235.3<br>60655 | 12854.84815 | 3615.873159 | 0.2812<br>84782 | -<br>1.829896<br>59 | 0.0133<br>53638 | 0.1431<br>291   | Down |
| IGFBP6     | 3203.0<br>89937 | 5345.42508  | 1060.754793 | 0.1984<br>41616 | -<br>2.333213<br>48 | 8.58E-<br>07    | 0.0001<br>35077 | Down |
| IGLON<br>5 | 46.399<br>66671 | 18.44443469 | 74.35489873 | 4.0312<br>91822 | 2.011242<br>222     | 0.0054<br>58242 | 0.0785<br>80386 | Up   |
| IGSF1      | 34.838<br>77165 | 64.03176258 | 5.645780722 | 0.0881<br>71565 | -<br>3.503542<br>72 | 0.0034<br>49404 | 0.0575<br>6133  | Down |
| IGSF11     | 20.983<br>61794 | 39.80983628 | 2.157399591 | 0.0541<br>92627 | -<br>4.205759<br>62 | 0.0065<br>50399 | 0.0890<br>62785 | Down |
| IGSF5      | 386.04<br>62915 | 77.0511059  | 695.0414771 | 9.0205<br>2565  | 3.173211<br>506     | 4.46E-<br>09    | 2.12E-<br>06    | Up   |
| IGSF9      | 388.31<br>53319 | 173.4062585 | 603.2244053 | 3.4786<br>77243 | 1.798538<br>83      | 0.0254<br>50166 | 0.2089<br>64746 | Up   |
| IGSF9B     | 46.488<br>5035  | 69.04293029 | 23.93407671 | 0.3466<br>54996 | -<br>1.528427<br>54 | 0.0146<br>16875 | 0.1517<br>98394 | Down |

|             |                 |             |             |                 |                     |                 |                 |      |
|-------------|-----------------|-------------|-------------|-----------------|---------------------|-----------------|-----------------|------|
| IKBIP       | 782.93<br>11663 | 1146.925536 | 418.936796  | 0.3652<br>69394 | -<br>1.452967<br>22 | 0.0023<br>17063 | 0.0441<br>36754 | Down |
| IKBKE       | 1882.1<br>9728  | 956.3760644 | 2808.018495 | 2.9361<br>02857 | 1.553902<br>509     | 0.0004<br>43968 | 0.0144<br>30152 | Up   |
| IKZF1       | 468.83<br>04708 | 307.8913814 | 629.7695603 | 2.0454<br>27701 | 1.032402<br>544     | 0.0453<br>77076 | 0.2892<br>51645 | Up   |
| IL12RB<br>1 | 62.057<br>23535 | 35.54670531 | 88.56776539 | 2.4915<br>88591 | 1.317065<br>871     | 0.0480<br>21176 | 0.2988<br>99472 | Up   |
| IL13RA<br>1 | 3447.9<br>78509 | 5369.557896 | 1526.399122 | 0.2842<br>6905  | -<br>1.814671<br>06 | 0.0009<br>92671 | 0.0252<br>56401 | Down |
| IL17D       | 189.37<br>63135 | 256.8775942 | 121.8750328 | 0.4744<br>47891 | -<br>1.075678<br>45 | 0.0400<br>63937 | 0.2700<br>72255 | Down |
| IL17RE      | 197.64<br>23242 | 107.2100694 | 288.0745789 | 2.6870<br>1047  | 1.426001<br>943     | 0.0237<br>55871 | 0.2013<br>77893 | Up   |
| IL18BP      | 726.60<br>01328 | 378.7607533 | 1074.439512 | 2.8367<br>23454 | 1.504225<br>512     | 0.0017<br>45002 | 0.0367<br>06729 | Up   |
| IL20RA      | 163.67<br>22178 | 36.68305115 | 290.6613845 | 7.9235<br>88015 | 2.986153<br>87      | 3.64E-<br>07    | 6.51E-<br>05    | Up   |
| IL21R       | 96.477<br>3452  | 50.13888418 | 142.8158062 | 2.8484<br>04159 | 1.510153<br>864     | 0.0190<br>70096 | 0.1786<br>11349 | Up   |
| IL2RB       | 488.01<br>10376 | 203.8814068 | 772.1406684 | 3.7872<br>04926 | 1.921133<br>488     | 6.62E-<br>05    | 0.0037<br>80951 | Up   |
| IL2RG       | 458.92<br>0087  | 245.1751561 | 672.665018  | 2.7436<br>10033 | 1.456075<br>436     | 0.0042<br>76042 | 0.0664<br>38865 | Up   |
| IL33        | 1415.3<br>7781  | 2107.111507 | 723.6441124 | 0.3434<br>29434 | -<br>1.541914<br>4  | 0.0072<br>74381 | 0.0951<br>16362 | Down |
| IL34        | 1444.9<br>00199 | 569.1599433 | 2320.640454 | 4.0773<br>08112 | 2.027616<br>982     | 0.0176<br>13628 | 0.1700<br>66421 | Up   |
| IL6         | 48.578<br>0459  | 95.69895082 | 1.457140988 | 0.0152<br>26301 | -<br>6.037290<br>73 | 0.0004<br>04264 | 0.0136<br>85629 | Down |
| IL6ST       | 3507.4<br>2684  | 5309.707855 | 1705.145824 | 0.3211<br>37409 | -<br>1.638737<br>36 | 0.0009<br>14966 | 0.0237<br>86942 | Down |
| IL7         | 98.312<br>35577 | 61.1044292  | 135.5202823 | 2.2178<br>4712  | 1.149159<br>922     | 0.0415<br>33175 | 0.2746<br>46511 | Up   |
| ILDR1       | 194.42<br>65154 | 62.69119565 | 326.1618351 | 5.2026<br>73704 | 2.379253<br>229     | 3.72E-<br>05    | 0.0024<br>67197 | Up   |
| IMPA2       | 642.58<br>33311 | 218.549184  | 1066.617478 | 4.8804<br>45942 | 2.287012<br>977     | 0.0328<br>399   | 0.2426<br>13887 | Up   |

|            |                 |             |             |                 |                     |                 |                 |          |
|------------|-----------------|-------------|-------------|-----------------|---------------------|-----------------|-----------------|----------|
| IMPAD<br>1 | 557.19<br>67597 | 857.9604454 | 256.4330739 | 0.2988<br>86825 | -<br>1.742328<br>79 | 0.0003<br>60837 | 0.0127<br>38044 | Dow<br>n |
| INADL      | 637.96<br>3584  | 415.6955906 | 860.2315773 | 2.0693<br>78644 | 1.049197<br>646     | 0.0358<br>49174 | 0.2543<br>64694 | Up       |
| INHBA      | 771.65<br>58154 | 1486.022696 | 57.28893476 | 0.0385<br>51857 | -<br>4.697055<br>83 | 0.0151<br>75924 | 0.1554<br>56272 | Dow<br>n |
| INO80D     | 64.873<br>22164 | 94.85830068 | 34.8881426  | 0.3677<br>92195 | -<br>1.443037<br>23 | 0.0142<br>4724  | 0.1491<br>61905 | Dow<br>n |
| INPP5A     | 1484.1<br>30525 | 2169.508337 | 798.7527122 | 0.3681<br>72225 | -<br>1.441547<br>3  | 0.0418<br>52667 | 0.2761<br>44941 | Dow<br>n |
| INPP5B     | 1460.6<br>22172 | 969.3295651 | 1951.914779 | 2.0136<br>7507  | 1.009830<br>906     | 0.0187<br>30429 | 0.1764<br>65324 | Up       |
| IQGAP<br>2 | 1930.6<br>61051 | 737.520741  | 3123.801361 | 4.2355<br>43745 | 2.082547<br>19      | 3.45E-<br>05    | 0.0022<br>95847 | Up       |
| IQGAP<br>3 | 160.29<br>96293 | 246.2820201 | 74.31723846 | 0.3017<br>56655 | -<br>1.728542<br>51 | 0.0024<br>02199 | 0.0452<br>80316 | Dow<br>n |
| IRAK3      | 145.83<br>0096  | 216.5323546 | 75.12783746 | 0.3469<br>58946 | -<br>1.527163<br>13 | 0.0055<br>39551 | 0.0792<br>10362 | Dow<br>n |
| IRF6       | 795.19<br>1369  | 308.5522167 | 1281.830521 | 4.1543<br>39045 | 2.054618<br>963     | 0.0019<br>56511 | 0.0394<br>34083 | Up       |
| IRF7       | 470.19<br>17469 | 284.9440386 | 655.4394552 | 2.3002<br>39227 | 1.201783<br>911     | 0.0096<br>46518 | 0.1154<br>70167 | Up       |
| IRF8       | 485.57<br>60366 | 248.363666  | 722.7884072 | 2.9102<br>01878 | 1.541119<br>235     | 0.0044<br>42758 | 0.0684<br>39713 | Up       |
| IRX1       | 1409.4<br>75701 | 617.8493564 | 2201.102046 | 3.5625<br>22196 | 1.832899<br>003     | 0.0212<br>67638 | 0.1893<br>01998 | Up       |
| IRX3       | 1900.7<br>57315 | 1133.236228 | 2668.278401 | 2.3545<br>65036 | 1.235460<br>572     | 0.0298<br>8011  | 0.2308<br>38247 | Up       |
| IRX4       | 548.29<br>41288 | 177.8184846 | 918.769773  | 5.1668<br>96878 | 2.369298<br>09      | 4.55E-<br>06    | 0.0004<br>68611 | Up       |
| ISL2       | 72.154<br>1694  | 127.4657626 | 16.84257615 | 0.1321<br>34118 | -<br>2.919925<br>06 | 0.0047<br>96963 | 0.0721<br>73265 | Dow<br>n |
| ITGA1      | 2524.2<br>38648 | 4613.92349  | 434.5538063 | 0.0941<br>83141 | -<br>3.408387<br>35 | 0.0030<br>30237 | 0.0527<br>12105 | Dow<br>n |
| ITGA11     | 1727.1<br>08756 | 3407.686985 | 46.53052683 | 0.0136<br>54578 | -<br>6.194471       | 0.0003<br>32935 | 0.0120<br>35715 | Dow<br>n |



|              |                 |             |             |                 |                     |                 |                 |          |
|--------------|-----------------|-------------|-------------|-----------------|---------------------|-----------------|-----------------|----------|
|              |                 |             |             |                 | 49                  |                 |                 |          |
| ITGA5        | 6545.5<br>12184 | 11483.17185 | 1607.852514 | 0.1400<br>18153 | -<br>2.836314<br>21 | 0.0081<br>58079 | 0.1026<br>96151 | Dow<br>n |
| ITGA8        | 1720.0<br>92499 | 3316.624394 | 123.5606044 | 0.0372<br>54928 | -<br>4.746424<br>9  | 0.0061<br>23344 | 0.0851<br>64995 | Dow<br>n |
| ITGA9        | 442.59<br>37699 | 747.8557416 | 137.3317982 | 0.1836<br>34076 | -<br>2.445094<br>3  | 5.52E-<br>05    | 0.0032<br>55701 | Dow<br>n |
| ITGB1        | 20134.<br>11463 | 30351.2064  | 9917.022864 | 0.3267<br>42296 | -<br>1.613774<br>88 | 0.0036<br>51442 | 0.0595<br>01686 | Dow<br>n |
| ITGB2        | 623.54<br>88809 | 413.9940357 | 833.1037262 | 2.0123<br>56832 | 1.008886<br>147     | 0.0350<br>06355 | 0.2514<br>85321 | Up       |
| ITGB5        | 3927.7<br>39867 | 5669.880002 | 2185.599731 | 0.3854<br>75483 | -<br>1.375288<br>99 | 0.0034<br>31159 | 0.0574<br>75259 | Dow<br>n |
| ITGB6        | 1068.2<br>46778 | 169.8022217 | 1966.691334 | 11.582<br>24736 | 3.533843<br>308     | 1.75E-<br>08    | 6.12E-<br>06    | Up       |
| ITGBL1       | 898.60<br>69695 | 1771.648452 | 25.56548694 | 0.0144<br>30339 | -<br>6.114751<br>04 | 0.0029<br>34227 | 0.0515<br>89196 | Dow<br>n |
| ITIH2        | 995.46<br>21236 | 17.12291624 | 1973.801331 | 115.27<br>24981 | 6.848904<br>544     | 6.93E-<br>14    | 1.39E-<br>10    | Up       |
| ITIH5        | 2819.1<br>6745  | 4970.359689 | 667.9752116 | 0.1343<br>91725 | -<br>2.895483<br>79 | 0.0013<br>22912 | 0.0305<br>16647 | Dow<br>n |
| ITK          | 123.45<br>80263 | 76.24119574 | 170.6748569 | 2.2386<br>17263 | 1.162607<br>891     | 0.0475<br>82272 | 0.2974<br>13932 | Up       |
| ITPRIP<br>L2 | 1130.0<br>50418 | 1683.837289 | 576.2635467 | 0.3422<br>32323 | -<br>1.546952<br>07 | 0.0008<br>88023 | 0.0232<br>49706 | Dow<br>n |
| ITSN1        | 1082.5<br>0202  | 1468.782148 | 696.2218919 | 0.4740<br>13041 | -<br>1.077001<br>35 | 0.0107<br>35283 | 0.1239<br>08471 | Dow<br>n |
| JADE1        | 2072.5<br>31504 | 2796.851818 | 1348.211189 | 0.4820<br>45985 | -<br>1.052757<br>32 | 0.0159<br>28832 | 0.1594<br>43543 | Dow<br>n |
| JAM3         | 1420.6<br>32903 | 2000.368193 | 840.8976133 | 0.4203<br>71418 | -<br>1.250263<br>52 | 0.0037<br>65279 | 0.0608<br>07396 | Dow<br>n |
| JAZF1        | 242.71<br>07524 | 434.1092012 | 51.31230353 | 0.1182<br>01373 | -<br>3.080681       | 0.0042<br>69726 | 0.0663<br>97921 | Dow<br>n |

|            |                 |             |             |                 |                     |                 |                 |          |
|------------|-----------------|-------------|-------------|-----------------|---------------------|-----------------|-----------------|----------|
|            |                 |             |             |                 | 3                   |                 |                 |          |
| JPH2       | 1616.0<br>03729 | 2891.398778 | 340.6086803 | 0.1178<br>00659 | -<br>3.085580<br>49 | 0.0176<br>8885  | 0.1705<br>44722 | Dow<br>n |
| JUP        | 5365.0<br>49017 | 3566.011489 | 7164.086545 | 2.0089<br>91437 | 1.006471<br>415     | 0.0186<br>74748 | 0.1761<br>89212 | Up       |
| KANK1      | 3404.4<br>82015 | 4682.744072 | 2126.219958 | 0.4540<br>54274 | -<br>1.139063<br>34 | 0.0496<br>2088  | 0.3044<br>91699 | Dow<br>n |
| KANK2      | 2986.5<br>71712 | 4481.030192 | 1492.113232 | 0.3329<br>84418 | -<br>1.586473<br>43 | 0.0035<br>31385 | 0.0584<br>96472 | Dow<br>n |
| KBTD<br>12 | 59.437<br>45173 | 118.0746874 | 0.80021608  | 0.0067<br>77203 | -<br>7.205094<br>38 | 0.0365<br>85843 | 0.2579<br>02315 | Dow<br>n |
| KCNA1      | 26.740<br>47571 | 11.70450858 | 41.77644284 | 3.5692<br>6073  | 1.835625<br>292     | 0.0207<br>50722 | 0.1876<br>3021  | Up       |
| KCNA2      | 18.048<br>06552 | 32.19646171 | 3.899669337 | 0.1211<br>21053 | -<br>3.045478<br>44 | 0.0384<br>72877 | 0.2643<br>45915 | Dow<br>n |
| KCNA4      | 28.863<br>76629 | 6.072363962 | 51.65516861 | 8.5065<br>9956  | 3.088582<br>542     | 0.0137<br>80961 | 0.1456<br>32543 | Up       |
| KCNA6      | 119.31<br>13906 | 200.9235994 | 37.69918173 | 0.1876<br>29436 | -<br>2.414041<br>91 | 0.0073<br>48879 | 0.0958<br>40468 | Dow<br>n |
| KCNB2      | 44.641<br>58519 | 88.34205118 | 0.941119198 | 0.0106<br>53128 | -<br>6.552579<br>06 | 2.48E-<br>08    | 7.73E-<br>06    | Dow<br>n |
| KCND3      | 66.634<br>3431  | 20.16464457 | 113.1040416 | 5.6090<br>27287 | 2.487750<br>601     | 0.0157<br>30926 | 0.1582<br>8958  | Up       |
| KCNE1<br>L | 15.999<br>19596 | 28.5704762  | 3.427915712 | 0.1199<br>81049 | -<br>3.059121<br>54 | 0.0088<br>80657 | 0.1094<br>24976 | Dow<br>n |
| KCNE3      | 232.01<br>02864 | 67.62979502 | 396.3907779 | 5.8611<br>85559 | 2.551192<br>512     | 0.0383<br>89195 | 0.2643<br>13518 | Up       |
| KCNE4      | 280.09<br>36536 | 491.6082274 | 68.57907977 | 0.1394<br>99455 | -<br>2.841668<br>61 | 4.60E-<br>05    | 0.0028<br>40009 | Dow<br>n |
| KCNG1      | 539.49<br>81993 | 1060.163528 | 18.83287065 | 0.0177<br>64119 | -<br>5.814890<br>08 | 0.0357<br>01982 | 0.2539<br>1239  | Dow<br>n |
| KCNG2      | 45.816<br>38431 | 2.927726518 | 88.7050421  | 30.298<br>26781 | 4.921163<br>41      | 0.0029<br>8639  | 0.0522<br>51682 | Up       |
| KCNH2      | 181.12          | 331.1826457 | 31.06226592 | 0.0937          | -                   | 0.0379          | 0.2626          | Dow      |

|            |                 |             |             |                 |                     |                 |                 |      |
|------------|-----------------|-------------|-------------|-----------------|---------------------|-----------------|-----------------|------|
|            | 24558           |             |             | 91949           | 3.414392<br>1       | 97971           | 37007           | n    |
| KCNJ11     | 47.164<br>68585 | 2.946688385 | 91.38268331 | 31.011<br>99427 | 4.954754<br>399     | 2.70E-<br>06    | 0.0003<br>13944 | Up   |
| KCNJ8      | 433.25<br>51254 | 690.7542266 | 175.7560241 | 0.2544<br>40751 | -<br>1.974598<br>35 | 0.0013<br>57698 | 0.0310<br>36526 | Down |
| KCNK1<br>2 | 110.99<br>7663  | 219.9255283 | 2.069797732 | 0.0094<br>11357 | -<br>6.731381<br>48 | 1.05E-<br>05    | 0.0008<br>78244 | Down |
| KCNK2      | 113.80<br>0221  | 65.15420388 | 162.4462382 | 2.4932<br>57971 | 1.318032<br>162     | 0.0167<br>71499 | 0.1646<br>3984  | Up   |
| KCNK7      | 32.261<br>71358 | 13.29152417 | 51.23190299 | 3.8544<br>79164 | 1.946535<br>929     | 0.0131<br>06338 | 0.1415<br>2317  | Up   |
| KCNN4      | 408.54<br>39916 | 182.7398244 | 634.3481587 | 3.4713<br>1864  | 1.795483<br>799     | 0.0008<br>76453 | 0.0230<br>1359  | Up   |
| KCNQ3      | 6.4605<br>13784 | 12.73346823 | 0.187559335 | 0.0147<br>29635 | -<br>6.085134<br>54 | 0.0179<br>32603 | 0.1719<br>98999 | Down |
| KCNQ5      | 75.988<br>62631 | 42.68042806 | 109.2968246 | 2.5608<br>18378 | 1.356604<br>936     | 0.0327<br>91539 | 0.2425<br>90527 | Up   |
| KCNT1      | 169.69<br>08125 | 88.15773898 | 251.2238861 | 2.8497<br>08817 | 1.510814<br>512     | 0.0041<br>17907 | 0.0649<br>32626 | Up   |
| KCTD1      | 669.49<br>88003 | 232.8768377 | 1106.120763 | 4.7498<br>1013  | 2.247869<br>844     | 0.0045<br>25209 | 0.0693<br>15676 | Up   |
| KCTD1<br>0 | 2112.1<br>14657 | 3014.882754 | 1209.346559 | 0.4011<br>25569 | -<br>1.317874<br>17 | 0.0036<br>38475 | 0.0594<br>19902 | Down |
| KCTD1<br>5 | 536.47<br>9545  | 889.7064031 | 183.2526869 | 0.2059<br>69842 | -<br>2.279494<br>98 | 0.0058<br>69431 | 0.0826<br>5314  | Down |
| KCTD9      | 636.29<br>80651 | 933.6976511 | 338.8984791 | 0.3629<br>63834 | -<br>1.462102<br>29 | 0.0091<br>45118 | 0.1112<br>58704 | Down |
| KDELC<br>1 | 375.58<br>04163 | 524.7587002 | 226.4021323 | 0.4314<br>40455 | -<br>1.212766<br>63 | 0.0309<br>08709 | 0.2358<br>55412 | Down |
| KDELC<br>2 | 1160.4<br>9957  | 1612.256583 | 708.7425569 | 0.4395<br>96628 | -<br>1.185747<br>78 | 0.0136<br>72817 | 0.1448<br>2909  | Down |
| KDELR<br>3 | 2076.4<br>9967  | 3207.688786 | 945.3105529 | 0.2947<br>01455 | -<br>1.762673<br>91 | 8.47E-<br>05    | 0.0044<br>29597 | Down |
| KDF1       | 299.39          | 100.7598902 | 498.0335423 | 4.9427          | 2.305321            | 7.32E-          | 0.0006          | Up   |

|               |                 |             |             |                 |                     |                 |                 |      |
|---------------|-----------------|-------------|-------------|-----------------|---------------------|-----------------|-----------------|------|
|               | 67163           |             |             | 75753           | 455                 | 06              | 66813           |      |
| KIAA01<br>95  | 2109.9<br>51485 | 1237.746978 | 2982.155992 | 2.4093<br>42171 | 1.268639<br>298     | 0.0024<br>52582 | 0.0458<br>46759 | Up   |
| KIAA04<br>08  | 175.78<br>46258 | 321.1686867 | 30.40056491 | 0.0946<br>56068 | -<br>3.401161<br>2  | 0.0193<br>94005 | 0.1802<br>84617 | Down |
| KIAA05<br>56  | 1502.6<br>87241 | 855.5955274 | 2149.778955 | 2.5126<br>11259 | 1.329187<br>48      | 0.0018<br>64761 | 0.0380<br>52508 | Up   |
| KIAA07<br>54  | 312.22<br>55194 | 505.8473777 | 118.6036612 | 0.2344<br>65308 | -<br>2.092553<br>62 | 2.34E-<br>05    | 0.0016<br>7798  | Down |
| KIAA12<br>11  | 129.38<br>6738  | 203.754254  | 55.01922208 | 0.2700<br>27354 | -<br>1.888822<br>53 | 0.0012<br>64487 | 0.0295<br>48792 | Down |
| KIAA12<br>11L | 388.00<br>07177 | 110.3904795 | 665.6109558 | 6.0296<br>04715 | 2.592063<br>426     | 3.50E-<br>07    | 6.50E-<br>05    | Up   |
| KIAA12<br>17  | 2660.0<br>88898 | 1670.913905 | 3649.26389  | 2.1839<br>92771 | 1.126968<br>081     | 0.0129<br>76785 | 0.1408<br>47308 | Up   |
| KIAA12<br>44  | 987.10<br>74102 | 503.3861401 | 1470.82868  | 2.9218<br>69641 | 1.546891<br>814     | 0.0007<br>85544 | 0.0212<br>13218 | Up   |
| KIAA13<br>24  | 806.27<br>76731 | 55.62520206 | 1556.930144 | 27.989<br>65373 | 4.806821<br>734     | 0.0414<br>42198 | 0.2743<br>57952 | Up   |
| KIAA13<br>24L | 143.53<br>09742 | 259.8222737 | 27.23967461 | 0.1048<br>39644 | -<br>3.253743<br>74 | 0.0035<br>46134 | 0.0586<br>48091 | Down |
| KIAA14<br>62  | 947.75<br>64958 | 1382.481608 | 513.031384  | 0.3710<br>94546 | -<br>1.430141<br>3  | 0.0026<br>67257 | 0.0482<br>11067 | Down |
| KIAA14<br>67  | 681.35<br>96113 | 219.7685362 | 1142.950686 | 5.2007<br>02095 | 2.378706<br>4       | 0.0413<br>8063  | 0.2743<br>38426 | Up   |
| KIAA15<br>22  | 1461.7<br>62939 | 663.6174418 | 2259.908435 | 3.4054<br>38575 | 1.767840<br>61      | 0.0002<br>56109 | 0.0099<br>14059 | Up   |
| KIAA15<br>49L | 20.116<br>5469  | 4.523272101 | 35.7098217  | 7.8946<br>87938 | 2.980882<br>24      | 0.0052<br>92409 | 0.0771<br>16126 | Up   |
| KIAA16<br>14  | 272.67<br>38036 | 394.9946745 | 150.3529327 | 0.3806<br>45468 | -<br>1.393480<br>19 | 0.0078<br>95563 | 0.1010<br>12811 | Down |
| KIAA17<br>55  | 245.98<br>10925 | 60.60542236 | 431.3567626 | 7.1174<br>61537 | 2.831362<br>792     | 0.0143<br>1786  | 0.1497<br>27468 | Up   |
| KIAA20<br>18  | 169.22<br>7145  | 237.2972068 | 101.1570832 | 0.4262<br>88554 | -<br>1.230097<br>78 | 0.0243<br>45313 | 0.2044<br>53029 | Down |
| KIAA20<br>22  | 65.880<br>94256 | 93.65720007 | 38.10468506 | 0.4068<br>52704 | -<br>1.297421       | 0.0458<br>97133 | 0.2909<br>12993 | Down |

|              |                 |             |             |                 |                     |                 |                 |          |
|--------------|-----------------|-------------|-------------|-----------------|---------------------|-----------------|-----------------|----------|
|              |                 |             |             |                 | 52                  |                 |                 |          |
| KIF11        | 161.81<br>54642 | 237.0542881 | 86.57664019 | 0.3652<br>18621 | -<br>1.453167<br>77 | 0.0111<br>32063 | 0.1268<br>66675 | Dow<br>n |
| KIF13B       | 2530.0<br>75661 | 1440.220265 | 3619.931057 | 2.5134<br>56548 | 1.329672<br>748     | 0.0030<br>96311 | 0.0534<br>64611 | Up       |
| KIF1A        | 591.89<br>49577 | 196.6176887 | 987.1722267 | 5.0207<br>70171 | 2.327908<br>686     | 0.0083<br>42904 | 0.1045<br>12259 | Up       |
| KIF20A       | 198.32<br>75607 | 286.8175267 | 109.8375947 | 0.3829<br>52869 | -<br>1.384761<br>25 | 0.0109<br>88402 | 0.1256<br>9422  | Dow<br>n |
| KIF21A       | 204.06<br>4754  | 122.2588668 | 285.8706413 | 2.3382<br>40562 | 1.225423<br>364     | 0.0369<br>7198  | 0.2596<br>09787 | Up       |
| KIF23        | 197.32<br>49445 | 270.2189766 | 124.4309124 | 0.4604<br>81769 | -<br>1.118784<br>05 | 0.0303<br>34295 | 0.2331<br>34516 | Dow<br>n |
| KIF26B       | 364.27<br>35217 | 575.8831114 | 152.6639321 | 0.2650<br>95345 | -<br>1.915416<br>76 | 0.0423<br>55443 | 0.2777<br>35309 | Dow<br>n |
| KIF7         | 657.22<br>83741 | 972.9543833 | 341.5023648 | 0.3509<br>95248 | -<br>1.510476<br>6  | 0.0154<br>05532 | 0.1566<br>65588 | Dow<br>n |
| KIR2D<br>L5A | 31.520<br>6893  | 8.357226874 | 54.68415173 | 6.5433<br>36989 | 2.710026<br>573     | 0.0007<br>53929 | 0.0207<br>0773  | Up       |
| KIR2DS<br>1  | 65.943<br>08523 | 12.78119404 | 119.1049764 | 9.3187<br>67563 | 3.220139<br>166     | 5.00E-<br>06    | 0.0005<br>00664 | Up       |
| KIRRE<br>L   | 2123.6<br>3078  | 3367.701002 | 879.5605574 | 0.2611<br>75371 | -<br>1.936909<br>24 | 0.0030<br>08077 | 0.0524<br>8778  | Dow<br>n |
| KITLG        | 141.73<br>11114 | 209.1260208 | 74.33620197 | 0.3554<br>61275 | -<br>1.492235<br>7  | 0.0026<br>88585 | 0.0485<br>47933 | Dow<br>n |
| KLB          | 36.696<br>78157 | 73.39356315 | 0           | 0               | #NAME<br>?          | 7.77E-<br>05    | 0.0041<br>45649 | Dow<br>n |
| KLC3         | 99.551<br>50171 | 14.21841659 | 184.8845868 | 13.003<br>17695 | 3.700792<br>242     | 3.73E-<br>08    | 1.08E-<br>05    | Up       |
| KLF12        | 171.77<br>22107 | 253.9354384 | 89.60898299 | 0.3528<br>80967 | -<br>1.502746<br>48 | 0.0124<br>17583 | 0.1366<br>69171 | Dow<br>n |
| KLF13        | 75.420<br>80633 | 106.8845497 | 43.95706293 | 0.4112<br>57408 | -<br>1.281886<br>43 | 0.0217<br>19453 | 0.1913<br>51941 | Dow<br>n |
| KLF4         | 1161.1<br>81615 | 1976.809896 | 345.5533345 | 0.1748<br>03523 | -<br>2.516193       | 0.0010<br>93155 | 0.0270<br>12915 | Dow<br>n |

|            |                 |             |             |                 |                     |                 |                 |      |
|------------|-----------------|-------------|-------------|-----------------|---------------------|-----------------|-----------------|------|
|            |                 |             |             |                 | 83                  |                 |                 |      |
| KL F5      | 605.97<br>08091 | 153.8230468 | 1058.118571 | 6.8788<br>03882 | 2.782157<br>724     | 1.81E-<br>07    | 3.85E-<br>05    | Up   |
| KL F6      | 2014.5<br>3071  | 2958.174738 | 1070.886682 | 0.3620<br>09272 | -<br>1.465901<br>45 | 0.0006<br>97421 | 0.0195<br>35381 | Down |
| KL F7      | 827.64<br>96344 | 1287.322574 | 367.9766946 | 0.2858<br>46533 | -<br>1.806687<br>3  | 0.0001<br>22899 | 0.0058<br>96208 | Down |
| KLHL1<br>5 | 188.96<br>06406 | 264.7419561 | 113.179325  | 0.4275<br>08079 | -<br>1.225976<br>41 | 0.0171<br>61423 | 0.1671<br>5708  | Down |
| KLHL2<br>8 | 93.647<br>23817 | 137.0179543 | 50.27652208 | 0.3669<br>33825 | -<br>1.446408<br>19 | 0.0205<br>98857 | 0.1866<br>98305 | Down |
| KLHL2<br>9 | 174.54<br>72144 | 249.5087724 | 99.58565638 | 0.3991<br>26874 | -<br>1.325080<br>67 | 0.0156<br>86232 | 0.1581<br>00954 | Down |
| KLHL3      | 214.43<br>64956 | 317.6777977 | 111.1951936 | 0.3500<br>25071 | -<br>1.514469<br>84 | 0.0053<br>7118  | 0.0779<br>18506 | Down |
| KLHL3<br>0 | 31.289<br>80541 | 59.00030531 | 3.579305511 | 0.0606<br>65881 | -<br>4.042970<br>82 | 0.0213<br>28063 | 0.1894<br>32264 | Down |
| KLHL3<br>2 | 98.842<br>29641 | 177.5435458 | 20.14104704 | 0.1134<br>42857 | -<br>3.139962<br>33 | 0.0040<br>48526 | 0.0644<br>7387  | Down |
| KLHL4      | 43.647<br>64341 | 83.02382134 | 4.271465487 | 0.0514<br>48674 | -<br>4.280722<br>31 | 2.10E-<br>06    | 0.0002<br>56181 | Down |
| KLHL4<br>0 | 317.17<br>47475 | 88.40972472 | 545.9397703 | 6.1751<br>09944 | 2.626464<br>823     | 0.0033<br>32547 | 0.0561<br>83009 | Up   |
| KLHL6      | 92.601<br>42341 | 44.43533815 | 140.7675087 | 3.1679<br>18025 | 1.663535<br>004     | 0.0051<br>6588  | 0.0759<br>65342 | Up   |
| KLK1       | 24.297<br>83375 | 6.829229377 | 41.76643812 | 6.1158<br>34718 | 2.612549<br>418     | 0.0044<br>03243 | 0.0678<br>88976 | Up   |
| KLK10      | 152.19<br>69456 | 257.3478246 | 47.04606666 | 0.1828<br>11208 | -<br>2.451573<br>57 | 4.90E-<br>05    | 0.0029<br>83785 | Down |
| KLK14      | 9.6765<br>29786 | 17.8049942  | 1.548065368 | 0.0869<br>4557  | -<br>3.523743<br>67 | 0.0315<br>88384 | 0.2381<br>50572 | Down |
| KLK7       | 501.48<br>41096 | 870.8463653 | 132.121854  | 0.1517<br>16605 | -<br>2.720549       | 9.68E-<br>07    | 0.0001<br>46743 | Down |

|             |                 |             |             |                 |                     |                 |                 |          |
|-------------|-----------------|-------------|-------------|-----------------|---------------------|-----------------|-----------------|----------|
|             |                 |             |             |                 | 1                   |                 |                 |          |
| KLK8        | 8.6177<br>07693 | 16.48517805 | 0.750237342 | 0.0455<br>09811 | -<br>4.457678<br>59 | 0.0235<br>61994 | 0.2004<br>18389 | Dow<br>n |
| KLRD1       | 46.119<br>45952 | 22.10793226 | 70.13098678 | 3.1722<br>0923  | 1.665487<br>93      | 0.0201<br>66983 | 0.1842<br>27428 | Up       |
| KLRK1       | 81.292<br>4718  | 46.45703601 | 116.1279076 | 2.4996<br>83957 | 1.321745<br>702     | 0.0412<br>55098 | 0.2741<br>80238 | Up       |
| KPNA3       | 320.60<br>79918 | 469.0277772 | 172.1882063 | 0.3671<br>1729  | -<br>1.445687<br>03 | 0.0040<br>9792  | 0.0648<br>47586 | Dow<br>n |
| KRBA1       | 665.89<br>83819 | 415.2787403 | 916.5180235 | 2.2069<br>94807 | 1.142083<br>235     | 0.0083<br>85627 | 0.1049<br>01752 | Up       |
| KRT1        | 7.7062<br>74989 | 0.309818372 | 15.10273161 | 48.747<br>04976 | 5.607243<br>002     | 0.0108<br>17206 | 0.1243<br>66846 | Up       |
| KRT17       | 2591.9<br>78564 | 724.3343871 | 4459.622741 | 6.1568<br>5631  | 2.622193<br>899     | 1.18E-<br>07    | 2.81E-<br>05    | Up       |
| KRT18       | 1953.2<br>55829 | 283.0691797 | 3623.442478 | 12.800<br>55455 | 3.678134<br>408     | 0.0019<br>78398 | 0.0397<br>0332  | Up       |
| KRT19       | 9767.7<br>94885 | 4364.360817 | 15171.22895 | 3.4761<br>62854 | 1.797495<br>672     | 0.0458<br>15205 | 0.2907<br>83181 | Up       |
| KRT222      | 10.428<br>04038 | 0.354139598 | 20.50194116 | 57.892<br>25856 | 5.855298<br>537     | 0.0023<br>15486 | 0.0441<br>36754 | Up       |
| KRT5        | 4905.4<br>41577 | 1716.693931 | 8094.189223 | 4.7149<br>868   | 2.237253<br>732     | 5.15E-<br>06    | 0.0005<br>10487 | Up       |
| KRT7        | 4611.9<br>35293 | 1003.367476 | 8220.503111 | 8.1929<br>13674 | 3.034376<br>614     | 1.63E-<br>06    | 0.0002<br>06718 | Up       |
| KRT75       | 25.775<br>95517 | 1.618772445 | 49.93313789 | 30.846<br>29841 | 4.947025<br>469     | 0.0347<br>48381 | 0.2504<br>29904 | Up       |
| KRT8        | 4126.0<br>12072 | 668.8107711 | 7583.213373 | 11.338<br>35414 | 3.503139<br>33      | 0.0001<br>51778 | 0.0069<br>03794 | Up       |
| KRTCA<br>P3 | 436.81<br>23946 | 178.9735678 | 694.6512215 | 3.8813<br>06218 | 1.956542<br>26      | 0.0040<br>49477 | 0.0644<br>7387  | Up       |
| KYNU        | 100.60<br>75255 | 34.42057322 | 166.7944778 | 4.8457<br>78619 | 2.276728<br>496     | 0.0055<br>45593 | 0.0792<br>10362 | Up       |
| LAD1        | 722.68<br>39418 | 215.8157468 | 1229.552137 | 5.6972<br>3088  | 2.510260<br>872     | 2.61E-<br>07    | 5.21E-<br>05    | Up       |
| LAMA4       | 7585.0<br>02344 | 12034.6698  | 3135.33489  | 0.2605<br>25211 | -<br>1.940505<br>11 | 5.18E-<br>05    | 0.0031<br>13149 | Dow<br>n |
| LAMB1       | 7008.0<br>02237 | 9408.346342 | 4607.658131 | 0.4897<br>41551 | -<br>1.029907<br>49 | 0.0155<br>87598 | 0.1577<br>0313  | Dow<br>n |
| LAMB2       | 11678.          | 17784.50875 | 5571.822369 | 0.3132          | -                   | 0.0005          | 0.0161          | Dow      |

|             |                 |             |             |                 |                     |                 |                 |      |
|-------------|-----------------|-------------|-------------|-----------------|---------------------|-----------------|-----------------|------|
|             | 16556           |             |             | 96389           | 1.674399<br>95      | 31904           | 53229           | n    |
| LAMB3       | 1310.9<br>69643 | 570.5678124 | 2051.371474 | 3.5953<br>15806 | 1.846118<br>5       | 0.0002<br>07901 | 0.0085<br>94854 | Up   |
| LAMC1       | 14532.<br>99359 | 23302.60461 | 5763.382576 | 0.2473<br>27828 | -<br>2.015503<br>52 | 2.34E-<br>05    | 0.0016<br>7798  | Down |
| LAMC2       | 572.92<br>6102  | 274.650957  | 871.2012471 | 3.1720<br>30626 | 1.665406<br>701     | 0.0010<br>11254 | 0.0255<br>40201 | Up   |
| LAMC3       | 168.31<br>16668 | 56.10827095 | 280.5150626 | 4.9995<br>31404 | 2.321792<br>88      | 0.0025<br>5084  | 0.0469<br>93118 | Up   |
| LAMP3       | 213.22<br>65757 | 120.524845  | 305.9283063 | 2.5383<br>00765 | 1.343863<br>025     | 0.0166<br>83909 | 0.1642<br>80045 | Up   |
| LAMP5       | 6.0232<br>57004 | 12.04651401 | 0           | 0               | #NAME<br>?          | 0.0356<br>21891 | 0.2534<br>8453  | Down |
| LAP3        | 2333.9<br>59986 | 1456.989423 | 3210.93055  | 2.2038<br>11846 | 1.140001<br>057     | 0.0203<br>0741  | 0.1849<br>30623 | Up   |
| LAT         | 169.50<br>38365 | 102.1739415 | 236.8337315 | 2.3179<br>46514 | 1.212847<br>277     | 0.0299<br>54936 | 0.2312<br>18267 | Up   |
| LATS2       | 680.38<br>04021 | 920.5888499 | 440.1719543 | 0.4781<br>4174  | -<br>1.064489<br>74 | 0.0398<br>67854 | 0.2696<br>40422 | Down |
| LCA5        | 58.201<br>66787 | 17.97525181 | 98.42808393 | 5.4757<br>55499 | 2.453058<br>029     | 0.0276<br>70149 | 0.2197<br>89437 | Up   |
| LCAT        | 907.55<br>86967 | 1318.78235  | 496.3350434 | 0.3763<br>58573 | -<br>1.409820<br>26 | 0.0037<br>10981 | 0.0601<br>45904 | Down |
| LCK         | 327.40<br>30214 | 142.5637204 | 512.2423223 | 3.5930<br>7628  | 1.845219<br>564     | 0.0002<br>08213 | 0.0085<br>94854 | Up   |
| LCNL1       | 71.049<br>5901  | 21.08666072 | 121.0125195 | 5.7388<br>1854  | 2.520753<br>758     | 7.29E-<br>05    | 0.0040<br>02829 | Up   |
| LCP2        | 703.13<br>56715 | 367.6204736 | 1038.650869 | 2.8253<br>3467  | 1.498421<br>77      | 0.0024<br>66035 | 0.0459<br>07943 | Up   |
| LDB2        | 752.77<br>13    | 1205.448709 | 300.0938908 | 0.2489<br>47872 | -<br>2.006084<br>41 | 1.34E-<br>05    | 0.0010<br>78071 | Down |
| LDHA        | 726.24<br>86915 | 1192.708658 | 259.7887249 | 0.2178<br>14068 | -<br>2.198830<br>96 | 1.44E-<br>05    | 0.0011<br>30707 | Down |
| LDHD        | 141.14<br>83023 | 23.48486463 | 258.81174   | 11.020<br>36329 | 3.462099<br>879     | 1.95E-<br>08    | 6.50E-<br>06    | Up   |
| LDLRA<br>D1 | 712.66<br>45116 | 42.12666811 | 1383.202355 | 32.834<br>364   | 5.037134<br>606     | 0.0001<br>21863 | 0.0058<br>62103 | Up   |
| LDLRA       | 1895.7          | 3137.359877 | 654.1289945 | 0.2084          | -                   | 0.0185          | 0.1759          | Down |



|             |                 |             |             |                 |                     |                 |                 |          |
|-------------|-----------------|-------------|-------------|-----------------|---------------------|-----------------|-----------------|----------|
| D4          | 44436           |             |             | 96641           | 2.261903<br>96      | 94029           | 0312            | n        |
| LDOC1       | 48.182<br>45274 | 86.79657597 | 9.568329509 | 0.1102<br>3856  | -<br>3.181299<br>15 | 0.0002<br>55548 | 0.0099<br>14059 | Dow<br>n |
| LEPR        | 17.450<br>7283  | 32.36561582 | 2.535840783 | 0.0783<br>49839 | -<br>3.673925<br>88 | 0.0083<br>07131 | 0.1042<br>08852 | Dow<br>n |
| LEPRE<br>L2 | 2353.3<br>434   | 3202.687106 | 1503.999694 | 0.4696<br>05567 | -<br>1.090478<br>58 | 0.0185<br>72384 | 0.1759<br>0312  | Dow<br>n |
| LGALS<br>1  | 5963.4<br>65995 | 10356.16808 | 1570.763913 | 0.1516<br>74239 | -<br>2.720952<br>02 | 7.07E-<br>05    | 0.0039<br>50957 | Dow<br>n |
| LGALS<br>12 | 25.169<br>87472 | 48.9792434  | 1.360506033 | 0.0277<br>77196 | -<br>5.169955<br>23 | 0.0310<br>81518 | 0.2360<br>01279 | Dow<br>n |
| LGALS<br>4  | 469.10<br>17752 | 278.5734163 | 659.6301342 | 2.3678<br>8615  | 1.243599<br>717     | 0.0066<br>95236 | 0.0903<br>24507 | Up       |
| LGALS<br>7  | 35.276<br>96579 | 19.01017875 | 51.54375283 | 2.7113<br>76549 | 1.439025<br>485     | 0.0377<br>73075 | 0.2625<br>77459 | Up       |
| LGALS<br>L  | 1349.0<br>63738 | 1970.278177 | 727.8492982 | 0.3694<br>14485 | -<br>1.436687<br>66 | 0.0045<br>12716 | 0.0692<br>2184  | Dow<br>n |
| LGI2        | 133.80<br>15411 | 233.9402902 | 33.66279196 | 0.1438<br>94803 | -<br>2.796913<br>61 | 0.0069<br>82912 | 0.0926<br>89287 | Dow<br>n |
| LHCGR       | 13.615<br>30358 | 27.23060716 | 0           | 0               | #NAME<br>?          | 3.01E-<br>05    | 0.0020<br>70784 | Dow<br>n |
| LHFP        | 2118.9<br>32611 | 3418.330461 | 819.5347611 | 0.2397<br>47084 | -<br>2.060414<br>83 | 0.0286<br>43153 | 0.2251<br>76205 | Dow<br>n |
| LHFPL<br>2  | 1324.6<br>19287 | 1809.77979  | 839.4587842 | 0.4638<br>45816 | -<br>1.108282<br>77 | 0.0475<br>6794  | 0.2974<br>13932 | Dow<br>n |
| LIF         | 213.57<br>06261 | 400.3799391 | 26.76131309 | 0.0668<br>39795 | -<br>3.903148<br>88 | 0.0327<br>63479 | 0.2425<br>90527 | Dow<br>n |
| LIMCH<br>1  | 1015.6<br>428   | 1484.007847 | 547.277753  | 0.3687<br>83598 | -<br>1.439153<br>6  | 0.0014<br>09064 | 0.0318<br>12389 | Dow<br>n |
| LIME1       | 189.00<br>51602 | 111.7252417 | 266.2850786 | 2.3833<br>92281 | 1.253016<br>423     | 0.0262<br>07891 | 0.2128<br>60941 | Up       |
| LIMS2       | 2456.0          | 4046.154522 | 865.872522  | 0.2139          | -                   | 0.0066          | 0.0903          | Dow      |

|                  |                 |             |             |                 |                     |                 |                 |          |
|------------------|-----------------|-------------|-------------|-----------------|---------------------|-----------------|-----------------|----------|
|                  | 13522           |             |             | 98877           | 2.224324<br>87      | 99606           | 24507           | n        |
| LINGO<br>4       | 6.7909<br>48994 | 0.666090467 | 12.91580752 | 19.390<br>47046 | 4.277275<br>902     | 0.0199<br>23959 | 0.1833<br>71577 | Up       |
| LIPH             | 94.362<br>13233 | 13.07418304 | 175.6500816 | 13.434<br>8801  | 3.747911<br>541     | 6.58E-<br>09    | 2.83E-<br>06    | Up       |
| LIX1L            | 813.78<br>07865 | 1228.749842 | 398.811731  | 0.3245<br>67066 | -<br>1.623411<br>48 | 0.0002<br>888   | 0.0108<br>30897 | Dow<br>n |
| LLGL2            | 1200.4<br>34009 | 513.6195151 | 1887.248502 | 3.6744<br>09649 | 1.877512<br>477     | 0.0001<br>74943 | 0.0075<br>86063 | Up       |
| LMAN1<br>L       | 127.09<br>9555  | 13.37462955 | 240.8244805 | 18.006<br>06736 | 4.170411<br>217     | 0.0217<br>06062 | 0.1913<br>51941 | Up       |
| LMAN2<br>L       | 359.76<br>71388 | 208.5011086 | 511.033169  | 2.4509<br>8538  | 1.293361<br>879     | 0.0079<br>62517 | 0.1016<br>53109 | Up       |
| LMBR1<br>L       | 506.21<br>32214 | 305.5095071 | 706.9169356 | 2.3138<br>95048 | 1.210323<br>429     | 0.0059<br>49796 | 0.0834<br>59071 | Up       |
| LMO1             | 83.717<br>07916 | 50.34937908 | 117.0847792 | 2.3254<br>46339 | 1.217507<br>649     | 0.0390<br>74918 | 0.2664<br>92421 | Up       |
| LMOD1            | 2975.2<br>76659 | 4970.605843 | 979.9474751 | 0.1971<br>48498 | -<br>2.342645<br>38 | 0.0377<br>00349 | 0.2623<br>75233 | Dow<br>n |
| LMX1A            | 37.787<br>06389 | 69.70223013 | 5.871897646 | 0.0842<br>42608 | -<br>3.569306<br>09 | 0.0387<br>59654 | 0.2654<br>04161 | Dow<br>n |
| LMX1B            | 416.28<br>81499 | 91.25783706 | 741.3184628 | 8.1233<br>4027  | 3.022073<br>077     | 0.0011<br>72984 | 0.0282<br>49053 | Up       |
| LNPEP            | 420.31<br>83903 | 630.5747451 | 210.0620355 | 0.3331<br>27892 | -<br>1.585851<br>94 | 0.0017<br>55598 | 0.0367<br>06729 | Dow<br>n |
| LNX1             | 297.35<br>73801 | 185.0804694 | 409.6342907 | 2.2132<br>767   | 1.146183<br>826     | 0.0217<br>24418 | 0.1913<br>51941 | Up       |
| LOC100<br>126544 | 133.07<br>49525 | 87.84218393 | 178.3077211 | 2.0298<br>6439  | 1.021383<br>348     | 0.0404<br>06458 | 0.2710<br>64373 | Up       |
| LOC100<br>137797 | 131.09<br>89145 | 211.1207126 | 51.07711636 | 0.2419<br>33232 | -<br>2.047319<br>14 | 0.0079<br>44542 | 0.1014<br>95459 | Dow<br>n |
| LOC100<br>138381 | 11.221<br>16426 | 1.665226167 | 20.77710235 | 12.477<br>04532 | 3.641204<br>425     | 0.0439<br>98093 | 0.2839<br>64796 | Up       |
| LOC100<br>139075 | 5.9406<br>57513 | 0.9991357   | 10.88217933 | 10.891<br>59292 | 3.445143<br>062     | 0.0492<br>7299  | 0.3030<br>20077 | Up       |
| LOC100<br>139101 | 8.3792<br>08409 | 1.26250035  | 15.49591647 | 12.273<br>98984 | 3.617532<br>389     | 0.0210<br>79078 | 0.1885<br>20321 | Up       |
| LOC100           | 39.445          | 60.6936036  | 18.19643714 | 0.2998          | -                   | 0.0113          | 0.1283          | Dow      |

|                  |                 |             |             |                 |                     |                 |                 |          |
|------------------|-----------------|-------------|-------------|-----------------|---------------------|-----------------|-----------------|----------|
| 139363           | 02037           |             |             | 08152           | 1.737888<br>48      | 36725           | 76132           | n        |
| LOC100<br>139916 | 113.97<br>83431 | 50.2918512  | 177.664835  | 3.5326<br>76383 | 1.820761<br>595     | 0.0397<br>82175 | 0.2693<br>86183 | Up       |
| LOC100<br>295741 | 2268.8<br>03152 | 5.026774539 | 4532.579529 | 901.68<br>74527 | 9.816483<br>636     | 0.0020<br>52457 | 0.0405<br>96787 | Up       |
| LOC100<br>295973 | 690.28<br>90292 | 929.4230033 | 451.155055  | 0.4854<br>14126 | -<br>1.042712       | 0.0395<br>99356 | 0.2689<br>50594 | Dow<br>n |
| LOC100<br>297152 | 49.674<br>0048  | 73.22700881 | 26.12100079 | 0.3567<br>12656 | -<br>1.487165<br>69 | 0.0379<br>01208 | 0.2626<br>37007 | Dow<br>n |
| LOC100<br>297621 | 5.7556<br>2736  | 11.51125472 | 0           | 0               | #NAME<br>?          | 0.0183<br>11023 | 0.1742<br>99877 | Dow<br>n |
| LOC100<br>299144 | 20.956<br>76474 | 5.096455123 | 36.81707437 | 7.2240<br>55442 | 2.852808<br>965     | 0.0036<br>06167 | 0.0591<br>91673 | Up       |
| LOC100<br>299281 | 3306.4<br>7868  | 1300.15017  | 5312.807191 | 4.0863<br>02732 | 2.030796<br>089     | 1.76E-<br>05    | 0.0013<br>48405 | Up       |
| LOC100<br>300091 | 363.65<br>31735 | 9.046544202 | 718.2598029 | 79.396<br>04194 | 6.310995<br>183     | 4.61E-<br>24    | 8.31E-<br>20    | Up       |
| LOC100<br>300510 | 434.47<br>1383  | 191.7524358 | 677.1903303 | 3.5315<br>86587 | 1.820316<br>469     | 0.0003<br>11982 | 0.0115<br>24399 | Up       |
| LOC100<br>300716 | 264.50<br>97076 | 11.46627268 | 517.5531424 | 45.136<br>99934 | 5.496238<br>608     | 0.0386<br>07313 | 0.2649<br>05792 | Up       |
| LOC100<br>300760 | 134.41<br>73285 | 57.2378757  | 211.5967813 | 3.6967<br>96549 | 1.886275<br>648     | 0.0006<br>10361 | 0.0177<br>83061 | Up       |
| LOC100<br>300806 | 30.940<br>74372 | 1.018097568 | 60.86338986 | 59.781<br>4903  | 5.901626<br>957     | 0.0262<br>87486 | 0.2131<br>68387 | Up       |
| LOC100<br>335205 | 246.61<br>08623 | 110.6074585 | 382.6142661 | 3.4592<br>08548 | 1.790441<br>993     | 0.0002<br>73573 | 0.0104<br>4412  | Up       |
| LOC100<br>335643 | 10.649<br>09798 | 1.308954073 | 19.98924189 | 15.271<br>15604 | 3.932737<br>374     | 0.0040<br>25722 | 0.0642<br>65484 | Up       |
| LOC100<br>336482 | 20.209<br>32608 | 34.40823945 | 6.010412712 | 0.1746<br>79461 | -<br>2.517218<br>11 | 0.0151<br>03985 | 0.1550<br>51755 | Dow<br>n |
| LOC100<br>336574 | 184.34<br>03939 | 271.1878457 | 97.49294205 | 0.3595<br>03361 | -<br>1.475922<br>84 | 0.0029<br>84914 | 0.0522<br>51682 | Dow<br>n |
| LOC100<br>336747 | 274.02<br>81019 | 374.7345722 | 173.3216315 | 0.4625<br>18391 | -<br>1.112417<br>36 | 0.0407<br>94077 | 0.2726<br>47198 | Dow<br>n |
| LOC100<br>336869 | 46.229<br>8334  | 15.55273002 | 76.90693677 | 4.9449<br>15567 | 2.305945<br>887     | 0.0010<br>71544 | 0.0265<br>51613 | Up       |
| LOC100<br>336949 | 4812.6<br>0462  | 7981.025065 | 1644.184175 | 0.2060<br>11654 | -<br>2.279202       | 0.0393<br>53771 | 0.2679<br>52254 | Dow<br>n |

|                  |                 |             |             |                 |                     |                 |                 |      |
|------------------|-----------------|-------------|-------------|-----------------|---------------------|-----------------|-----------------|------|
|                  |                 |             |             |                 | 14                  |                 |                 |      |
| LOC100<br>337066 | 42.997<br>82735 | 11.0448156  | 74.9508391  | 6.7860<br>65227 | 2.762575<br>297     | 0.0028<br>33698 | 0.0505<br>60901 | Up   |
| LOC100<br>337146 | 30.073<br>5314  | 49.66713859 | 10.47992421 | 0.2110<br>03181 | -<br>2.244663<br>35 | 0.0096<br>85168 | 0.1156<br>14855 | Down |
| LOC100<br>337214 | 33.799<br>28173 | 14.01450024 | 53.58406322 | 3.8234<br>72995 | 1.934883<br>685     | 0.0411<br>12672 | 0.2738<br>34966 | Up   |
| LOC100<br>337430 | 198.62<br>87024 | 58.88729544 | 338.3701094 | 5.7460<br>62998 | 2.522573<br>81      | 0.0048<br>7894  | 0.0731<br>59761 | Up   |
| LOC100<br>847119 | 392.00<br>8993  | 50.92879706 | 733.0891889 | 14.394<br>39435 | 3.847435<br>184     | 0.0098<br>77558 | 0.1172<br>24519 | Up   |
| LOC100<br>847265 | 138.51<br>91503 | 210.5923245 | 66.44597607 | 0.3155<br>19458 | -<br>1.664199<br>12 | 0.0033<br>49159 | 0.0564<br>10345 | Down |
| LOC100<br>847295 | 42.224<br>72913 | 61.88492067 | 22.56453758 | 0.3646<br>20934 | -<br>1.455530<br>7  | 0.0310<br>71813 | 0.2360<br>01279 | Down |
| LOC100<br>847319 | 100.58<br>51476 | 40.4211241  | 160.749171  | 3.9768<br>60481 | 1.991629<br>949     | 0.0004<br>75475 | 0.0150<br>47528 | Up   |
| LOC100<br>847677 | 12.781<br>56802 | 0           | 25.56313604 | Inf             | Inf                 | 0.0012<br>55204 | 0.0295<br>34737 | Up   |
| LOC100<br>847777 | 21.502<br>61172 | 43.00522345 | 0           | 0               | #NAME<br>?          | 0.0344<br>15526 | 0.2491<br>25873 | Down |
| LOC100<br>847951 | 23.822<br>25903 | 11.12492807 | 36.51958999 | 3.2826<br>81    | 1.714874<br>56      | 0.0345<br>49277 | 0.2495<br>93277 | Up   |
| LOC100<br>847952 | 25.818<br>83117 | 42.03652297 | 9.601139372 | 0.2283<br>99941 | -<br>2.130365<br>82 | 0.0072<br>39554 | 0.0949<br>08662 | Down |
| LOC100<br>848100 | 126.25<br>60785 | 251.9961353 | 0.516021789 | 0.0020<br>47737 | -<br>8.931753<br>91 | 0.0063<br>66509 | 0.0876<br>12167 | Down |
| LOC100<br>848461 | 128.65<br>31446 | 189.8583132 | 67.44797603 | 0.3552<br>54268 | -<br>1.493076<br>11 | 0.0052<br>47171 | 0.0765<br>80676 | Down |
| LOC100<br>848575 | 184.93<br>32492 | 79.79816147 | 290.0683369 | 3.6350<br>25313 | 1.861965<br>411     | 0.0090<br>62568 | 0.1106<br>64907 | Up   |
| LOC100<br>848815 | 2378.7<br>64355 | 1252.914094 | 3504.614615 | 2.7971<br>70717 | 1.483968<br>307     | 0.0008<br>99685 | 0.0235<br>20904 | Up   |
| LOC100<br>848982 | 10.568<br>54042 | 20.14930542 | 0.987775415 | 0.0490<br>22802 | -<br>4.350403<br>24 | 0.0258<br>69702 | 0.2110<br>09242 | Down |
| LOC100<br>850276 | 235.68<br>74707 | 334.5599214 | 136.81502   | 0.4089<br>40256 | -<br>1.290038       | 0.0178<br>78263 | 0.1717<br>28429 | Down |

|                  |                 |             |             |                 |                     |                 |                 |          |
|------------------|-----------------|-------------|-------------|-----------------|---------------------|-----------------|-----------------|----------|
| LOC100<br>852118 | 2180.3<br>64022 | 3670.160744 | 690.567301  | 0.1881<br>57236 | -<br>2.409989<br>32 | 0.0006<br>35597 | 0.0182<br>86337 | Dow<br>n |
| LOC101<br>902029 | 34.324<br>44159 | 14.40423148 | 54.2446517  | 3.7658<br>83087 | 1.912988<br>212     | 0.0308<br>49915 | 0.2356<br>061   | Up       |
| LOC101<br>902512 | 508.28<br>33368 | 788.4534648 | 228.1132088 | 0.2893<br>17276 | -<br>1.789275<br>62 | 0.0178<br>36563 | 0.1715<br>10533 | Dow<br>n |
| LOC101<br>902550 | 16.662<br>49858 | 29.3786716  | 3.946325554 | 0.1343<br>26208 | -<br>2.896187<br>28 | 0.0091<br>01165 | 0.1109<br>29669 | Dow<br>n |
| LOC101<br>903023 | 60.592<br>53268 | 90.44793937 | 30.73712599 | 0.3398<br>32242 | -<br>1.557105<br>36 | 0.0155<br>16448 | 0.1573<br>22315 | Dow<br>n |
| LOC101<br>903444 | 95.903<br>25081 | 9.426043158 | 182.3804585 | 19.348<br>57027 | 4.274155<br>06      | 0.0068<br>54184 | 0.0917<br>91116 | Up       |
| LOC101<br>903503 | 95.360<br>16241 | 60.45450729 | 130.2658175 | 2.1547<br>74282 | 1.107536<br>751     | 0.0486<br>57328 | 0.3013<br>14635 | Up       |
| LOC101<br>903854 | 87.539<br>06776 | 37.84050989 | 137.2376256 | 3.6267<br>38277 | 1.858672<br>637     | 0.0031<br>14376 | 0.0536<br>07095 | Up       |
| LOC101<br>904210 | 162.89<br>72704 | 232.2027216 | 93.59181912 | 0.4030<br>60819 | -<br>1.310930<br>55 | 0.0085<br>08406 | 0.1059<br>96647 | Dow<br>n |
| LOC101<br>904339 | 154.31<br>3861  | 74.25465931 | 234.3730627 | 3.1563<br>41499 | 1.658253<br>306     | 0.0055<br>24549 | 0.0792<br>10362 | Up       |
| LOC101<br>904653 | 6.4008<br>94372 | 0.642863606 | 12.15892514 | 18.913<br>6934  | 4.241359<br>21      | 0.0223<br>27099 | 0.1946<br>29282 | Up       |
| LOC101<br>904723 | 60.855<br>18683 | 12.65762076 | 109.0527529 | 8.6155<br>80679 | 3.106948<br>036     | 0.0039<br>57888 | 0.0634<br>63416 | Up       |
| LOC101<br>904834 | 7.9101<br>31782 | 0.952681978 | 14.86758159 | 15.606<br>02796 | 3.964031<br>485     | 0.0402<br>40903 | 0.2703<br>87671 | Up       |
| LOC101<br>905023 | 6.7681<br>89367 | 0.619636744 | 12.91674199 | 20.845<br>66822 | 4.381675<br>714     | 0.0223<br>52065 | 0.1946<br>92853 | Up       |
| LOC101<br>905132 | 38.417<br>09666 | 16.72701812 | 60.1071752  | 3.5934<br>1843  | 1.845356<br>937     | 0.0448<br>58887 | 0.2879<br>43731 | Up       |
| LOC101<br>905432 | 672.15<br>67842 | 435.5882767 | 908.7252917 | 2.0862<br>02362 | 1.060879<br>106     | 0.0294<br>33682 | 0.2290<br>18434 | Up       |
| LOC101<br>905478 | 166.87<br>08459 | 273.7550027 | 59.98668918 | 0.2191<br>25454 | -<br>2.190171<br>02 | 0.0230<br>28212 | 0.1980<br>00911 | Dow<br>n |
| LOC101<br>905630 | 135.72<br>31516 | 201.5580831 | 69.8882201  | 0.3467<br>39853 | -<br>1.528074<br>43 | 0.0087<br>31765 | 0.1082<br>55887 | Dow<br>n |
| LOC101           | 39.970          | 73.79146224 | 6.149446894 | 0.0833          | -                   | 0.0001          | 0.0055          | Dow      |

|                  |                 |             |             |                 |                     |                 |                 |      |
|------------------|-----------------|-------------|-------------|-----------------|---------------------|-----------------|-----------------|------|
| 905885           | 45457           |             |             | 3548            | 3.584925<br>34      | 14809           | 84507           | n    |
| LOC101<br>905937 | 230.73<br>01133 | 127.5394345 | 333.9207921 | 2.6181<br>76828 | 1.388562<br>538     | 0.0081<br>37507 | 0.1026<br>96151 | Up   |
| LOC101<br>906179 | 56.465<br>31889 | 22.11305767 | 90.8175801  | 4.1069<br>66186 | 2.038073<br>069     | 0.0019<br>0168  | 0.0384<br>57857 | Up   |
| LOC101<br>906282 | 16.866<br>26626 | 31.47517546 | 2.257357067 | 0.0717<br>18649 | -<br>3.801507<br>87 | 0.0104<br>36556 | 0.1216<br>96857 | Down |
| LOC101<br>906365 | 4.0674<br>82644 | 0           | 8.134965288 | Inf             | Inf                 | 0.0384<br>81755 | 0.2643<br>45915 | Up   |
| LOC101<br>906436 | 12.936<br>88749 | 25.26111823 | 0.612656744 | 0.0242<br>52954 | -<br>5.365695<br>7  | 0.0003<br>85561 | 0.0133<br>24005 | Down |
| LOC101<br>906598 | 598.02<br>71762 | 32.92687674 | 1163.127476 | 35.324<br>56129 | 5.142599<br>738     | 9.22E-<br>07    | 0.0001<br>40895 | Up   |
| LOC101<br>907048 | 143.47<br>47518 | 52.45543586 | 234.4940678 | 4.4703<br>48287 | 2.160387<br>237     | 0.0002<br>68369 | 0.0102<br>7836  | Up   |
| LOC101<br>907229 | 66.609<br>67326 | 109.395714  | 23.82363255 | 0.2177<br>74826 | -<br>2.199090<br>9  | 0.0007<br>81724 | 0.0212<br>0436  | Down |
| LOC101<br>908130 | 12.128<br>97407 | 24.25794814 | 0           | 0               | #NAME<br>?          | 0.0043<br>70572 | 0.0675<br>58475 | Down |
| LOC101<br>909753 | 67.822<br>84208 | 98.40500313 | 37.24068104 | 0.3784<br>42964 | -<br>1.401852<br>21 | 0.0118<br>53661 | 0.1326<br>47766 | Down |
| LOC104<br>968414 | 204.16<br>98898 | 382.3630044 | 25.97677515 | 0.0679<br>3747  | -<br>3.879648<br>7  | 0.0014<br>99628 | 0.0331<br>92379 | Down |
| LOC104<br>968434 | 40.370<br>70887 | 1.972912043 | 78.7685057  | 39.924<br>99615 | 5.319220<br>363     | 3.27E-<br>05    | 0.0022<br>00123 | Up   |
| LOC104<br>968448 | 94.458<br>33009 | 42.79077614 | 146.125884  | 3.4148<br>92115 | 1.771840<br>001     | 0.0440<br>2675  | 0.2840<br>48121 | Up   |
| LOC104<br>968450 | 380.88<br>37193 | 82.1532977  | 679.6141408 | 8.2725<br>11997 | 3.048325<br>479     | 0.0006<br>49294 | 0.0185<br>32615 | Up   |
| LOC104<br>968838 | 13.070<br>97522 | 0.9991357   | 25.14281474 | 25.164<br>56446 | 4.653321<br>723     | 0.0081<br>43112 | 0.1026<br>96151 | Up   |
| LOC104<br>968844 | 80.436<br>17307 | 160.0278619 | 0.844484243 | 0.0052<br>77108 | -<br>7.566036<br>89 | 0.0210<br>13576 | 0.1884<br>01543 | Down |
| LOC104<br>968894 | 4.1513<br>36685 | 8.30267337  | 0           | 0               | #NAME<br>?          | 0.0397<br>68133 | 0.2693<br>86183 | Down |
| LOC104<br>969591 | 95.587<br>2687  | 174.7874805 | 16.38705693 | 0.0937<br>5418  | -<br>3.414973       | 1.01E-<br>06    | 0.0001<br>47603 | Down |

|                  |                 |             |             |                 |                     |                 |                 |      |
|------------------|-----------------|-------------|-------------|-----------------|---------------------|-----------------|-----------------|------|
|                  |                 |             |             |                 | 17                  |                 |                 |      |
| LOC104<br>970193 | 8.4327<br>27799 | 0           | 16.8654556  | Inf             | Inf                 | 0.0008<br>37099 | 0.0222<br>39222 | Up   |
| LOC104<br>970256 | 5.8687<br>42604 | 0.619636744 | 11.11784846 | 17.942<br>52611 | 4.165311<br>115     | 0.0432<br>0911  | 0.2815<br>38325 | Up   |
| LOC104<br>971974 | 69.785<br>3239  | 123.7053232 | 15.86532456 | 0.1282<br>50945 | -<br>2.962958<br>64 | 0.0148<br>96326 | 0.1538<br>81552 | Down |
| LOC104<br>972276 | 40.333<br>76434 | 0.619636744 | 80.04789194 | 129.18<br>51922 | 7.013296<br>901     | 5.94E-<br>05    | 0.0034<br>40494 | Up   |
| LOC104<br>972294 | 76.763<br>74346 | 110.5367735 | 42.99071338 | 0.3889<br>26798 | -<br>1.362429<br>45 | 0.0273<br>33898 | 0.2182<br>90946 | Down |
| LOC104<br>972380 | 81.862<br>69762 | 0.309818372 | 163.4155769 | 527.45<br>60566 | 9.042907<br>095     | 0.0001<br>36393 | 0.0063<br>41209 | Up   |
| LOC104<br>972773 | 35.282<br>09119 | 17.43529732 | 53.12888505 | 3.0472<br>02699 | 1.607485<br>471     | 0.0404<br>93957 | 0.2714<br>49455 | Up   |
| LOC104<br>972835 | 67.982<br>27125 | 32.4981803  | 103.4663622 | 3.1837<br>58637 | 1.670730<br>968     | 0.0049<br>46531 | 0.0739<br>2749  | Up   |
| LOC104<br>972858 | 9.6280<br>60916 | 2.369240369 | 16.88688146 | 7.1275<br>50959 | 2.833406<br>449     | 0.0452<br>92138 | 0.2892<br>42548 | Up   |
| LOC104<br>972930 | 58.903<br>34159 | 88.21868998 | 29.58799321 | 0.3353<br>93704 | -<br>1.576072<br>49 | 0.0296<br>2953  | 0.2295<br>90679 | Down |
| LOC104<br>973704 | 37.735<br>40664 | 13.82038597 | 61.65042731 | 4.4608<br>3253  | 2.157312<br>987     | 0.0039<br>86868 | 0.0638<br>14647 | Up   |
| LOC104<br>973854 | 226.76<br>3241  | 308.8055579 | 144.7209241 | 0.4686<br>47407 | -<br>1.093425<br>19 | 0.0235<br>19824 | 0.2002<br>23737 | Down |
| LOC104<br>974494 | 77.616<br>13938 | 118.3148316 | 36.91744719 | 0.3120<br>27213 | -<br>1.680256<br>24 | 0.0080<br>43353 | 0.1023<br>23016 | Down |
| LOC104<br>974854 | 125.26<br>75895 | 52.69709488 | 197.8380841 | 3.7542<br>50297 | 1.908524<br>838     | 0.0005<br>54161 | 0.0165<br>98835 | Up   |
| LOC104<br>975409 | 16.219<br>15796 | 2.594681284 | 29.84363463 | 11.501<br>84988 | 3.523794<br>009     | 0.0026<br>22258 | 0.0476<br>36363 | Up   |
| LOC104<br>975474 | 19.482<br>10853 | 32.24544713 | 6.718769943 | 0.2083<br>63367 | -<br>2.262826<br>44 | 0.0324<br>34585 | 0.2420<br>71772 | Down |
| LOC104<br>975541 | 269.97<br>92222 | 539.9584444 | 0           | 0               | #NAME<br>?          | 7.38E-<br>05    | 0.0040<br>11515 | Down |
| LOC104<br>975620 | 209.83<br>10917 | 371.6839268 | 47.97825652 | 0.1290<br>83485 | -<br>2.953623<br>66 | 0.0208<br>28358 | 0.1878<br>61371 | Down |

|                  |                 |             |             |                 |                     |                 |                 |          |
|------------------|-----------------|-------------|-------------|-----------------|---------------------|-----------------|-----------------|----------|
| LOC104<br>975635 | 130.78<br>34001 | 180.6713168 | 80.89548348 | 0.4477<br>49454 | -<br>1.159236<br>42 | 0.0224<br>19738 | 0.1951<br>88056 | Dow<br>n |
| LOC104<br>975830 | 2161.5<br>15912 | 16.81523037 | 4306.216593 | 256.09<br>02527 | 8.000508<br>532     | 0.0049<br>28323 | 0.0737<br>57653 | Up       |
| LOC104<br>975908 | 15.239<br>99194 | 28.12599186 | 2.353992022 | 0.0836<br>94543 | -<br>3.578722<br>64 | 0.0130<br>23897 | 0.1410<br>29279 | Dow<br>n |
| LOC504<br>219    | 1389.3<br>52269 | 1941.428777 | 837.275761  | 0.4312<br>67822 | -<br>1.213344<br>02 | 0.0376<br>24382 | 0.2623<br>50059 | Dow<br>n |
| LOC504<br>773    | 1092.3<br>00245 | 1848.934766 | 335.6657233 | 0.1815<br>45466 | -<br>2.461597<br>2  | 0.0050<br>16251 | 0.0746<br>17795 | Dow<br>n |
| LOC505<br>052    | 17.869<br>46542 | 0           | 35.73893084 | Inf             | Inf                 | 0.0020<br>69899 | 0.0407<br>63009 | Up       |
| LOC506<br>831    | 1769.0<br>5498  | 836.319129  | 2701.79083  | 3.2305<br>73995 | 1.691790<br>52      | 0.0041<br>72904 | 0.0653<br>61438 | Up       |
| LOC507<br>019    | 20.816<br>32048 | 7.175269193 | 34.45737177 | 4.8022<br>40981 | 2.263707<br>801     | 0.0112<br>70305 | 0.1279<br>47691 | Up       |
| LOC507<br>513    | 257.66<br>07263 | 70.82795696 | 444.4934956 | 6.2756<br>78626 | 2.649771<br>475     | 0.0193<br>99855 | 0.1802<br>84617 | Up       |
| LOC507<br>550    | 103.37<br>80722 | 5.537104675 | 201.2190397 | 36.340<br>11844 | 5.183491<br>216     | 5.86E-<br>05    | 0.0034<br>19145 | Up       |
| LOC508<br>455    | 39.721<br>75104 | 19.78430374 | 59.65919834 | 3.0154<br>8132  | 1.592388<br>298     | 0.0163<br>91102 | 0.1624<br>61035 | Up       |
| LOC508<br>547    | 1224.1<br>94007 | 1838.759338 | 609.6286762 | 0.3315<br>43483 | -1.59273            | 0.0187<br>49972 | 0.1765<br>29613 | Dow<br>n |
| LOC508<br>744    | 130.10<br>05325 | 50.50922334 | 209.6918416 | 4.1515<br>55453 | 2.053651<br>969     | 0.0001<br>39651 | 0.0064<br>71652 | Up       |
| LOC508<br>879    | 514.05<br>81902 | 67.96531634 | 960.151064  | 14.127<br>07416 | 3.820390<br>796     | 0.0119<br>58138 | 0.1331<br>56085 | Up       |
| LOC509<br>055    | 820.47<br>69643 | 1244.056897 | 396.8970315 | 0.3190<br>34469 | -<br>1.648215<br>79 | 0.0002<br>9968  | 0.0111<br>92401 | Dow<br>n |
| LOC509<br>513    | 74.907<br>20081 | 27.91499868 | 121.899403  | 4.3668<br>06689 | 2.126578<br>667     | 0.0005<br>42106 | 0.0163<br>52935 | Up       |
| LOC509<br>972    | 407.84<br>60382 | 558.9899224 | 256.702154  | 0.4592<br>25012 | -<br>1.122726<br>87 | 0.0474<br>56534 | 0.2970<br>93093 | Dow<br>n |
| LOC510<br>369    | 185.19<br>13525 | 60.26526928 | 310.1174357 | 5.1458<br>73227 | 2.363415<br>915     | 3.77E-<br>05    | 0.0024<br>89362 | Up       |
| LOC510<br>536    | 148.54<br>04153 | 215.6582824 | 81.42254822 | 0.3775<br>53541 | -<br>1.405246       | 0.0147<br>83697 | 0.1529<br>14629 | Dow<br>n |



|               |                 |             |             |                 |                     |                 |                 |          |
|---------------|-----------------|-------------|-------------|-----------------|---------------------|-----------------|-----------------|----------|
|               |                 |             |             |                 | 85                  |                 |                 |          |
| LOC511<br>617 | 165.27<br>05606 | 71.49868061 | 259.0424406 | 3.6230<br>38053 | 1.857199<br>959     | 0.0002<br>95731 | 0.0110<br>67837 | Up       |
| LOC511<br>713 | 376.18<br>74323 | 135.2817198 | 617.0931447 | 4.5615<br>41246 | 2.189521<br>362     | 0.0014<br>34164 | 0.0321<br>77724 | Up       |
| LOC512<br>548 | 29.948<br>32837 | 1.572318722 | 58.32433801 | 37.094<br>4753  | 5.213132<br>429     | 3.38E-<br>07    | 6.42E-<br>05    | Up       |
| LOC512<br>672 | 512.61<br>99342 | 733.4583937 | 291.7814747 | 0.3978<br>15987 | -<br>1.329826<br>84 | 0.0033<br>70457 | 0.0566<br>10493 | Dow<br>n |
| LOC512<br>684 | 756.26<br>31286 | 474.3744912 | 1038.151766 | 2.1884<br>64568 | 1.129919<br>027     | 0.0245<br>24123 | 0.2053<br>80992 | Up       |
| LOC513<br>329 | 251.50<br>54676 | 41.09488415 | 461.9160511 | 11.240<br>23247 | 3.490599<br>968     | 5.81E-<br>10    | 3.88E-<br>07    | Up       |
| LOC513<br>659 | 240.56<br>94682 | 357.1474869 | 123.9914496 | 0.3471<br>71558 | -<br>1.526279<br>33 | 0.0022<br>94963 | 0.0439<br>81857 | Dow<br>n |
| LOC514<br>257 | 463.84<br>53344 | 628.4350621 | 299.2556068 | 0.4761<br>91774 | -<br>1.070385<br>4  | 0.0137<br>03355 | 0.1449<br>82304 | Dow<br>n |
| LOC515<br>150 | 241.00<br>12386 | 434.5232888 | 47.47918839 | 0.1092<br>67304 | -<br>3.194066<br>32 | 0.0047<br>63019 | 0.0720<br>48501 | Dow<br>n |
| LOC515<br>676 | 1174.3<br>93619 | 2333.311813 | 15.47542507 | 0.0066<br>32386 | -<br>7.236256<br>27 | 0.0064<br>11635 | 0.0879<br>72275 | Dow<br>n |
| LOC515<br>736 | 312.16<br>85927 | 198.3863594 | 425.950826  | 2.1470<br>77185 | 1.102374<br>055     | 0.0253<br>79176 | 0.2087<br>51475 | Up       |
| LOC516<br>421 | 58.842<br>90062 | 12.42065695 | 105.2651443 | 8.4750<br>0617  | 3.083214<br>418     | 7.17E-<br>05    | 0.0039<br>67823 | Up       |
| LOC519<br>494 | 187.79<br>97967 | 256.9701085 | 118.6294849 | 0.4616<br>4702  | -<br>1.115137<br>92 | 0.0432<br>88429 | 0.2818<br>0439  | Dow<br>n |
| LOC520<br>788 | 18.416<br>14582 | 4.586555194 | 32.24573645 | 7.0304<br>91314 | 2.813625<br>513     | 0.0041<br>74333 | 0.0653<br>61438 | Up       |
| LOC520<br>966 | 26.814<br>47592 | 39.65638951 | 13.97256233 | 0.3523<br>40758 | -<br>1.504956<br>72 | 0.0294<br>7191  | 0.2290<br>19384 | Dow<br>n |
| LOC521<br>656 | 52.270<br>88936 | 17.76577985 | 86.77599887 | 4.8844<br>46369 | 2.288195<br>048     | 0.0025<br>80998 | 0.0472<br>76381 | Up       |
| LOC522<br>437 | 13.633<br>29415 | 1.686320532 | 25.58026777 | 15.169<br>27967 | 3.923080<br>675     | 0.0013<br>71714 | 0.0312<br>22959 | Up       |
| LOC524<br>810 | 4432.6<br>34211 | 162.37637   | 8702.892053 | 53.597<br>0354  | 5.744081<br>298     | 0.0320<br>36634 | 0.2402<br>94739 | Up       |

|               |                 |             |             |                 |                     |                 |                 |      |
|---------------|-----------------|-------------|-------------|-----------------|---------------------|-----------------|-----------------|------|
| LOC525<br>353 | 513.21<br>00439 | 755.067132  | 271.3529557 | 0.3593<br>75934 | -<br>1.476434<br>3  | 0.0030<br>60122 | 0.0530<br>27408 | Down |
| LOC525<br>947 | 373.66<br>883   | 163.5997879 | 583.737872  | 3.5680<br>84528 | 1.835149<br>793     | 0.0008<br>20866 | 0.0219<br>04736 | Up   |
| LOC526<br>769 | 30.320<br>03272 | 10.61246543 | 50.02760001 | 4.7140<br>41268 | 2.236964<br>388     | 0.0129<br>41626 | 0.1407<br>19708 | Up   |
| LOC527<br>119 | 146.88<br>94263 | 31.05499046 | 262.7238621 | 8.4599<br>56296 | 3.080650<br>21      | 0.0115<br>60103 | 0.1301<br>70221 | Up   |
| LOC527<br>981 | 39.582<br>70985 | 12.9273829  | 66.23803679 | 5.1238<br>55097 | 2.357229<br>677     | 0.0426<br>9967  | 0.2790<br>79474 | Up   |
| LOC528<br>098 | 950.36<br>06738 | 1811.302386 | 89.41896129 | 0.0493<br>67219 | -<br>4.340302<br>82 | 0.0005<br>10702 | 0.0157<br>74927 | Down |
| LOC528<br>479 | 41.518<br>54931 | 6.02591024  | 77.01118839 | 12.780<br>00921 | 3.675816<br>971     | 0.0005<br>33975 | 0.0161<br>88863 | Up   |
| LOC529<br>196 | 41.113<br>69682 | 19.07559434 | 63.15179931 | 3.3106<br>07167 | 1.727095<br>832     | 0.0232<br>42698 | 0.1989<br>9147  | Up   |
| LOC530<br>077 | 104.54<br>76387 | 64.96263984 | 144.1326375 | 2.2187<br>00439 | 1.149714<br>893     | 0.0410<br>87103 | 0.2738<br>34966 | Up   |
| LOC530<br>173 | 10.595<br>11117 | 0           | 21.19022234 | Inf             | Inf                 | 0.0001<br>73199 | 0.0075<br>46698 | Up   |
| LOC530<br>653 | 45.753<br>19816 | 23.3295345  | 68.17686181 | 2.9223<br>41284 | 1.547124<br>672     | 0.0197<br>81213 | 0.1824<br>3011  | Up   |
| LOC530<br>929 | 210.61<br>20799 | 101.6655257 | 319.5586341 | 3.1432<br>34954 | 1.652250<br>116     | 0.0035<br>47431 | 0.0586<br>48091 | Up   |
| LOC531<br>296 | 617.23<br>17731 | 94.3080273  | 1140.155519 | 12.089<br>69747 | 3.595706<br>238     | 0.0001<br>11609 | 0.0055<br>00846 | Up   |
| LOC531<br>462 | 44.609<br>81841 | 63.88172039 | 25.33791644 | 0.3966<br>37978 | -<br>1.334105<br>27 | 0.0424<br>62369 | 0.2780<br>3219  | Down |
| LOC531<br>691 | 150.82<br>53859 | 218.2136998 | 83.43707199 | 0.3823<br>64041 | -<br>1.386981<br>24 | 0.0126<br>59791 | 0.1384<br>5598  | Down |
| LOC531<br>974 | 1419.4<br>68261 | 1922.018447 | 916.9180753 | 0.4770<br>59977 | -<br>1.067757<br>44 | 0.0289<br>26451 | 0.2264<br>63509 | Down |
| LOC533<br>307 | 423.35<br>00043 | 643.4585988 | 203.2414097 | 0.3158<br>57788 | -<br>1.662652<br>95 | 0.0014<br>73185 | 0.0327<br>67914 | Down |
| LOC533<br>821 | 1667.0<br>28146 | 786.2394701 | 2547.816823 | 3.2405<br>09946 | 1.696220<br>862     | 0.0114<br>77091 | 0.1294<br>98032 | Up   |
| LOC534<br>967 | 63.427<br>14671 | 10.38915702 | 116.4651364 | 11.210<br>25856 | 3.486747<br>649     | 0.0030<br>74288 | 0.0532<br>21771 | Up   |

|               |                 |             |             |                 |                     |                 |                 |          |
|---------------|-----------------|-------------|-------------|-----------------|---------------------|-----------------|-----------------|----------|
| LOC535<br>280 | 1410.4<br>68026 | 1957.11196  | 863.824092  | 0.4413<br>76942 | -<br>1.179916<br>83 | 0.0238<br>55822 | 0.2018<br>45764 | Dow<br>n |
| LOC537<br>655 | 101.97<br>17602 | 199.5254411 | 4.41807918  | 0.0221<br>42937 | -<br>5.497009<br>63 | 0.0032<br>94228 | 0.0555<br>94325 | Dow<br>n |
| LOC539<br>805 | 240.73<br>26285 | 147.7542731 | 333.7109838 | 2.2585<br>5386  | 1.175399<br>318     | 0.0122<br>82433 | 0.1355<br>34935 | Up       |
| LOC540<br>707 | 1364.7<br>6334  | 29.58495105 | 2699.941729 | 91.260<br>64548 | 6.511920<br>953     | 9.84E-<br>05    | 0.0049<br>72847 | Up       |
| LOC613<br>677 | 36.661<br>98893 | 55.75016504 | 17.57381283 | 0.3152<br>24409 | -<br>1.665548<br>84 | 0.0380<br>72576 | 0.2629<br>36903 | Dow<br>n |
| LOC614<br>376 | 34.799<br>66671 | 14.78629314 | 54.81304028 | 3.7070<br>17017 | 1.890258<br>738     | 0.0297<br>58513 | 0.2302<br>5544  | Up       |
| LOC614<br>705 | 482.33<br>07214 | 286.4702023 | 678.1912405 | 2.3674<br>05877 | 1.243307<br>068     | 0.0065<br>57893 | 0.0890<br>79698 | Up       |
| LOC615<br>277 | 24.688<br>05011 | 2.501773839 | 46.87432638 | 18.736<br>43638 | 4.227774<br>677     | 0.0016<br>40371 | 0.0352<br>6895  | Up       |
| LOC615<br>514 | 71.068<br>12103 | 42.70664783 | 99.42959424 | 2.3281<br>99456 | 1.219214<br>659     | 0.0379<br>2784  | 0.2626<br>37007 | Up       |
| LOC615<br>697 | 41.978<br>37881 | 0.642863606 | 83.31389402 | 129.59<br>80878 | 7.017900<br>622     | 1.67E-<br>08    | 6.03E-<br>06    | Up       |
| LOC615<br>867 | 59.903<br>88093 | 118.0721371 | 1.735624703 | 0.0146<br>99698 | -<br>6.088069<br>72 | 0.0009<br>96114 | 0.0253<br>01271 | Dow<br>n |
| LOC616<br>111 | 2375.6<br>64544 | 3661.692812 | 1089.636276 | 0.2975<br>77195 | -<br>1.748664<br>13 | 0.0008<br>5275  | 0.0225<br>8604  | Dow<br>n |
| LOC616<br>957 | 106.32<br>28898 | 211.7046604 | 0.941119198 | 0.0044<br>45434 | -<br>7.813459<br>85 | 0.0464<br>18367 | 0.2934<br>20711 | Dow<br>n |
| LOC617<br>141 | 26.893<br>3903  | 10.36806265 | 43.41871796 | 4.1877<br>36843 | 2.066170<br>786     | 0.0208<br>25334 | 0.1878<br>61371 | Up       |
| LOC617<br>302 | 38.698<br>93406 | 9.859865012 | 67.5380031  | 6.8497<br>89831 | 2.776059<br>723     | 0.0004<br>45756 | 0.0144<br>62216 | Up       |
| LOC751<br>811 | 14.106<br>78226 | 4.609782055 | 23.60378247 | 5.1203<br>68422 | 2.356247<br>619     | 0.0238<br>2867  | 0.2017<br>10642 | Up       |
| LOC768<br>255 | 457.50<br>98966 | 239.5286952 | 675.491098  | 2.8200<br>84238 | 1.495738<br>258     | 0.0014<br>61508 | 0.0326<br>69331 | Up       |
| LOC781<br>261 | 35.832<br>63334 | 6.16313891  | 65.50212777 | 10.628<br>04664 | 3.409804<br>558     | 0.0059<br>70607 | 0.0836<br>20953 | Up       |
| LOC781<br>635 | 6.2304<br>96146 | 0.333045233 | 12.12794706 | 36.415<br>31492 | 5.186473<br>416     | 0.0192<br>46161 | 0.1793<br>29283 | Up       |

|               |                 |             |             |                 |                     |                 |                 |      |
|---------------|-----------------|-------------|-------------|-----------------|---------------------|-----------------|-----------------|------|
| LOC782<br>865 | 11.291<br>65947 | 2.32705164  | 20.2562673  | 8.7046<br>91788 | 3.121793<br>216     | 0.0202<br>35106 | 0.1846<br>3383  | Up   |
| LOC782<br>892 | 18.592<br>60292 | 32.77283724 | 4.412368605 | 0.1346<br>34929 | -<br>2.892875<br>35 | 0.0113<br>16244 | 0.1282<br>24699 | Down |
| LOC783<br>396 | 38.461<br>9539  | 18.10352028 | 58.82038752 | 3.2491<br>13244 | 1.700046<br>028     | 0.0260<br>66029 | 0.2120<br>9125  | Up   |
| LOC783<br>399 | 428.11<br>03392 | 14.71404985 | 841.5066286 | 57.190<br>68762 | 5.837708<br>346     | 2.14E-<br>11    | 2.15E-<br>08    | Up   |
| LOC784<br>007 | 2198.6<br>39964 | 3676.285654 | 720.9942754 | 0.1961<br>20308 | -<br>2.350189<br>16 | 0.0181<br>44032 | 0.1730<br>83126 | Down |
| LOC785<br>370 | 11.934<br>27065 | 3.676061944 | 20.19247936 | 5.4929<br>64936 | 2.457585<br>083     | 0.0395<br>7239  | 0.2689<br>50594 | Up   |
| LOC785<br>756 | 206.56<br>30549 | 3.121410583 | 410.0046992 | 131.35<br>23768 | 7.037298<br>496     | 0.0015<br>84925 | 0.0345<br>71291 | Up   |
| LOC786<br>065 | 30.043<br>71899 | 8.157145317 | 51.93029265 | 6.3662<br>33607 | 2.670440<br>097     | 0.0011<br>26509 | 0.0274<br>50006 | Up   |
| LOC786<br>073 | 189.80<br>55176 | 257.4536771 | 122.1573581 | 0.4744<br>82864 | -<br>1.075572<br>11 | 0.0450<br>08958 | 0.2884<br>25076 | Down |
| LOC786<br>372 | 318.80<br>46936 | 200.0161254 | 437.5932618 | 2.1877<br>89914 | 1.129474<br>207     | 0.0235<br>7602  | 0.2004<br>18389 | Up   |
| LOC786<br>966 | 10953.<br>92907 | 14907.20651 | 7000.651635 | 0.4696<br>15258 | -<br>1.090448<br>81 | 0.0172<br>30137 | 0.1674<br>82917 | Down |
| LOC786<br>987 | 65.126<br>36151 | 26.72984849 | 103.5228745 | 3.8729<br>31588 | 1.953426<br>018     | 0.0086<br>42123 | 0.1073<br>65875 | Up   |
| LOC787<br>679 | 1261.6<br>74307 | 827.745059  | 1695.603556 | 2.0484<br>61102 | 1.034540<br>498     | 0.0194<br>08655 | 0.1802<br>84617 | Up   |
| LOC787<br>891 | 93.311<br>91839 | 36.15377768 | 150.4700591 | 4.1619<br>45687 | 2.057258<br>138     | 0.0005<br>36746 | 0.0162<br>45573 | Up   |
| LOC787<br>904 | 9.8123<br>6869  | 19.01208064 | 0.612656744 | 0.0322<br>24603 | -<br>4.955693<br>62 | 0.0071<br>97867 | 0.0944<br>9951  | Down |
| LOC788<br>054 | 21.611<br>85325 | 9.170977891 | 34.05272861 | 3.7130<br>96794 | 1.892622<br>924     | 0.0395<br>22018 | 0.2687<br>28866 | Up   |
| LOC788<br>414 | 148.59<br>99412 | 73.82929936 | 223.3705831 | 3.0255<br>00513 | 1.597173<br>829     | 0.0057<br>39205 | 0.0813<br>08118 | Up   |
| LOC789<br>374 | 193.74<br>91438 | 116.5501009 | 270.9481867 | 2.3247<br>35755 | 1.217066<br>739     | 0.0155<br>03533 | 0.1573<br>22315 | Up   |
| LOC789<br>829 | 196.50<br>43092 | 106.3079251 | 286.7006934 | 2.6968<br>89186 | 1.431296<br>243     | 0.0133<br>51751 | 0.1431<br>291   | Up   |
| LONP2         | 1912.7          | 1236.845066 | 2588.588653 | 2.0928          | 1.065500            | 0.0145          | 0.1516          | Up   |

|            |                 |             |             |                 |                     |                 |                 |          |
|------------|-----------------|-------------|-------------|-----------------|---------------------|-----------------|-----------------|----------|
|            | 1686            |             |             | 96453           | 936                 | 95597           | 64736           |          |
| LOX        | 1918.6<br>48378 | 3782.04294  | 55.25381583 | 0.0146<br>09516 | -<br>6.096947<br>83 | 0.0002<br>02339 | 0.0084<br>10137 | Dow<br>n |
| LOXL1      | 2554.0<br>9371  | 4466.676622 | 641.5107972 | 0.1436<br>215   | -<br>2.799656<br>36 | 0.0003<br>57937 | 0.0126<br>60457 | Dow<br>n |
| LOXL2      | 1959.3<br>39723 | 3448.925847 | 469.7535986 | 0.1362<br>0287  | -<br>2.876170<br>99 | 8.87E-<br>08    | 2.25E-<br>05    | Dow<br>n |
| LOXL4      | 479.16<br>89245 | 884.349073  | 73.98877601 | 0.0836<br>64673 | -<br>3.579237<br>61 | 2.82E-<br>09    | 1.41E-<br>06    | Dow<br>n |
| LPAR2      | 219.35<br>82806 | 65.74805106 | 372.9685101 | 5.6726<br>93017 | 2.504033<br>793     | 2.54E-<br>06    | 0.0002<br>99999 | Up       |
| LPAR3      | 161.32<br>37008 | 34.58144042 | 288.0659612 | 8.3300<br>74099 | 3.058329<br>329     | 0.0001<br>15164 | 0.0055<br>84507 | Up       |
| LPCAT<br>2 | 127.69<br>64512 | 187.9787078 | 67.41419455 | 0.3586<br>26758 | -<br>1.479444<br>96 | 0.0051<br>7978  | 0.0760<br>27708 | Dow<br>n |
| LPGAT<br>1 | 197.35<br>25601 | 296.7946231 | 97.9104971  | 0.3298<br>93096 | -<br>1.599929<br>51 | 0.0034<br>90965 | 0.0580<br>40102 | Dow<br>n |
| LPHN3      | 576.20<br>3976  | 963.0681898 | 189.3397623 | 0.1966<br>00578 | -<br>2.346660<br>54 | 0.0177<br>57953 | 0.1710<br>1194  | Dow<br>n |
| LPP        | 536.46<br>31693 | 938.8614027 | 134.064936  | 0.1427<br>95236 | -<br>2.807980<br>24 | 0.0071<br>68429 | 0.0941<br>81568 | Dow<br>n |
| LPXN       | 114.93<br>47443 | 57.2970934  | 172.5723953 | 3.0118<br>87428 | 1.590667<br>849     | 0.0051<br>66798 | 0.0759<br>65342 | Up       |
| LRBA       | 2333.6<br>08305 | 1554.805683 | 3112.410927 | 2.0018<br>00586 | 1.001298<br>264     | 0.0382<br>34746 | 0.2634<br>51714 | Up       |
| LRP1       | 17772.<br>01509 | 26983.34438 | 8560.685796 | 0.3172<br>58146 | -<br>1.656270<br>89 | 0.0005<br>3169  | 0.0161<br>53229 | Dow<br>n |
| LRP1B      | 10.136<br>86955 | 20.27373911 | 0           | 0               | #NAME<br>?          | 0.0453<br>36527 | 0.2892<br>51645 | Dow<br>n |
| LRRC1      | 989.05<br>28739 | 585.0615592 | 1393.044189 | 2.3810<br>21564 | 1.251580<br>686     | 0.0449<br>32708 | 0.2881<br>41172 | Up       |
| LRRC2      | 183.49<br>49496 | 42.28366952 | 324.7062297 | 7.6792<br>34875 | 2.940962<br>574     | 1.13E-<br>07    | 2.72E-<br>05    | Up       |
| LRRC2<br>3 | 14.187<br>4787  | 5.473821582 | 22.90113581 | 4.1837<br>56352 | 2.064798<br>836     | 0.0474<br>27248 | 0.2970<br>93093 | Up       |

|             |                 |             |             |                 |                     |                 |                 |      |
|-------------|-----------------|-------------|-------------|-----------------|---------------------|-----------------|-----------------|------|
| LRRC2<br>6  | 158.99<br>44877 | 68.15928055 | 249.8296949 | 3.6653<br>80457 | 1.873962<br>954     | 0.0091<br>60166 | 0.1112<br>72879 | Up   |
| LRRC2<br>7  | 153.10<br>50513 | 87.80490247 | 218.4052002 | 2.4873<br>91865 | 1.314633<br>809     | 0.0077<br>51172 | 0.0997<br>0439  | Up   |
| LRRC3<br>2  | 478.06<br>87188 | 762.313865  | 193.8235727 | 0.2542<br>56916 | -<br>1.975641<br>08 | 0.0004<br>41001 | 0.0143<br>8558  | Down |
| LRRC4<br>6  | 7.5641<br>12715 | 14.56554742 | 0.562678006 | 0.0386<br>30749 | -<br>4.694106<br>54 | 0.0297<br>08861 | 0.2301<br>06543 | Down |
| LRRC4<br>C  | 72.306<br>60532 | 21.77787994 | 122.8353307 | 5.6403<br>71379 | 2.495790<br>157     | 6.21E-<br>05    | 0.0035<br>78722 | Up   |
| LRRC5<br>5  | 37.290<br>88006 | 63.5915247  | 10.99023543 | 0.1728<br>25474 | -<br>2.532612<br>21 | 0.0029<br>69625 | 0.0520<br>76522 | Down |
| LRRC5<br>6  | 22.036<br>82055 | 8.726063345 | 35.34757776 | 4.0508<br>04626 | 2.018208<br>504     | 0.0208<br>06738 | 0.1878<br>61371 | Up   |
| LRRC5<br>8  | 108.36<br>31905 | 160.9421778 | 55.78420309 | 0.3466<br>10216 | -<br>1.528613<br>92 | 0.0072<br>50624 | 0.0949<br>84753 | Down |
| LRRC6       | 39.121<br>11307 | 12.93482187 | 65.30740427 | 5.0489<br>60466 | 2.335986<br>381     | 0.0410<br>99004 | 0.2738<br>34966 | Up   |
| LRRC8<br>B  | 516.35<br>92288 | 332.5122237 | 700.2062339 | 2.1058<br>05995 | 1.074372<br>529     | 0.0363<br>59401 | 0.2568<br>07842 | Up   |
| LRRC8<br>E  | 203.92<br>86993 | 104.8110236 | 303.046375  | 2.8913<br>5975  | 1.531748<br>124     | 0.0101<br>90022 | 0.1199<br>07247 | Up   |
| LRRIQ1      | 11.433<br>80549 | 3.522003904 | 19.34560707 | 5.4927<br>84107 | 2.457537<br>588     | 0.0482<br>62488 | 0.2997<br>95806 | Up   |
| LRRN1       | 19.788<br>32458 | 35.96543109 | 3.611218057 | 0.1004<br>08029 | -<br>3.316053<br>45 | 0.0456<br>17729 | 0.2901<br>61569 | Down |
| LRRN3       | 61.860<br>62027 | 29.31092392 | 94.41031662 | 3.2209<br>94223 | 1.687506<br>073     | 0.0054<br>40789 | 0.0785<br>17114 | Up   |
| LRRN4<br>CL | 1633.5<br>16372 | 2651.372844 | 615.6598996 | 0.2322<br>04196 | -<br>2.106534<br>05 | 1.08E-<br>05    | 0.0009<br>01657 | Down |
| LSR         | 587.56<br>1441  | 210.1118262 | 965.0110558 | 4.5928<br>45026 | 2.199388<br>104     | 1.47E-<br>05    | 0.0011<br>548   | Up   |
| LTBP1       | 6641.9<br>11029 | 11736.50126 | 1547.320797 | 0.1318<br>38336 | -<br>2.923158<br>16 | 0.0011<br>59767 | 0.0280<br>34715 | Down |
| LTBP2       | 3044.2<br>07795 | 5488.936744 | 599.4788461 | 0.1092<br>15842 | -<br>3.194745<br>96 | 0.0003<br>89484 | 0.0133<br>57214 | Down |

|             |                 |             |             |                 |                     |                 |                 |      |
|-------------|-----------------|-------------|-------------|-----------------|---------------------|-----------------|-----------------|------|
| LTF         | 13094<br>1.9479 | 3877.957036 | 258005.9388 | 66.531<br>40723 | 6.055963<br>644     | 1.40E-<br>05    | 0.0011<br>08732 | Up   |
| LUM         | 16234.<br>98082 | 28389.00034 | 4080.961303 | 0.1437<br>51497 | -<br>2.798351<br>11 | 0.0002<br>39185 | 0.0095<br>6686  | Down |
| LUZP2       | 196.22<br>81353 | 26.53573421 | 365.9205364 | 13.789<br>72722 | 3.785522<br>014     | 0.0080<br>29965 | 0.1022<br>24794 | Up   |
| LY6E        | 941.97<br>1754  | 294.7495561 | 1589.193952 | 5.3916<br>75471 | 2.430733<br>662     | 1.38E-<br>05    | 0.0010<br>9621  | Up   |
| LY9         | 146.47<br>5266  | 86.7396779  | 206.2108542 | 2.3773<br>53239 | 1.249356<br>282     | 0.0338<br>22973 | 0.2471<br>17301 | Up   |
| LYPD2       | 22.238<br>54634 | 1.549091861 | 42.92800082 | 27.711<br>72059 | 4.792424<br>384     | 0.0023<br>64412 | 0.0449<br>43755 | Up   |
| LYPD3       | 192.69<br>87126 | 97.7960164  | 287.6014089 | 2.9408<br>29488 | 1.556223<br>138     | 0.0210<br>07738 | 0.1884<br>01543 | Up   |
| LYPD6<br>B  | 29.545<br>27937 | 4.167000006 | 54.92355874 | 13.180<br>59963 | 3.720344<br>1       | 3.32E-<br>05    | 0.0022<br>16104 | Up   |
| LYVE1       | 451.30<br>03572 | 847.1512407 | 55.44947379 | 0.0654<br>54043 | -<br>3.933373<br>88 | 1.02E-<br>06    | 0.0001<br>48734 | Down |
| M1AP        | 43.746<br>19807 | 24.77655912 | 62.71583702 | 2.5312<br>56932 | 1.339853<br>954     | 0.0401<br>02987 | 0.2701<br>26271 | Up   |
| MAB21<br>L2 | 536.03<br>25753 | 57.09910726 | 1014.966043 | 17.775<br>5151  | 4.151819<br>462     | 0.0009<br>7967  | 0.0250<br>6596  | Up   |
| MACR<br>OD1 | 497.41<br>92344 | 323.9493906 | 670.8890782 | 2.0709<br>68792 | 1.050305<br>814     | 0.0409<br>33903 | 0.2732<br>90749 | Up   |
| MAF         | 201.00<br>24843 | 281.2215476 | 120.7834211 | 0.4294<br>95613 | -<br>1.219284<br>7  | 0.0140<br>60994 | 0.1476<br>40433 | Down |
| MAGE<br>D1  | 3659.2<br>82063 | 5071.300018 | 2247.264108 | 0.4431<br>33733 | -<br>1.174185<br>94 | 0.0121<br>6837  | 0.1346<br>65785 | Down |
| MAGE<br>E2  | 65.683<br>19516 | 98.73892731 | 32.62746301 | 0.3304<br>41741 | -<br>1.597532<br>16 | 0.0104<br>93482 | 0.1222<br>02665 | Down |
| MAGE<br>L2  | 102.42<br>38398 | 161.9287862 | 42.91889342 | 0.2650<br>47954 | -<br>1.915674<br>69 | 0.0012<br>53299 | 0.0295<br>34737 | Down |
| MAK         | 14.056<br>46624 | 2.923461523 | 25.18947096 | 8.6163<br>16909 | 3.107071<br>313     | 0.0332<br>30894 | 0.2443<br>7509  | Up   |
| MAL         | 106.23<br>30186 | 156.2647981 | 56.20123902 | 0.3596<br>53868 | -<br>1.475318<br>98 | 0.0220<br>08074 | 0.1929<br>29521 | Down |
| MAL2        | 1055.8          | 389.1354458 | 1722.511379 | 4.4265          | 2.146169            | 0.0001          | 0.0059          | Up   |

|              |                 |             |             |                 |                     |                 |                 |          |
|--------------|-----------------|-------------|-------------|-----------------|---------------------|-----------------|-----------------|----------|
|              | 23413           |             |             | 08554           | 209                 | 24385           | 35913           |          |
| MAMD<br>C2   | 288.31<br>83371 | 486.4897616 | 90.14691261 | 0.1853<br>0074  | -<br>2.432059<br>46 | 0.0013<br>7785  | 0.0313<br>03577 | Dow<br>n |
| MAML<br>3    | 494.43<br>60667 | 253.6292816 | 735.2428517 | 2.8988<br>87884 | 1.535499<br>538     | 0.0042<br>92184 | 0.0666<br>32283 | Up       |
| MAMS<br>TR   | 78.506<br>89065 | 120.6751428 | 36.33863855 | 0.3011<br>27786 | -<br>1.731552<br>26 | 0.0039<br>54033 | 0.0634<br>58009 | Dow<br>n |
| MAN1<br>A1   | 1905.6<br>73977 | 2776.955232 | 1034.392723 | 0.3724<br>91681 | -<br>1.424719<br>89 | 0.0166<br>61638 | 0.1641<br>99265 | Dow<br>n |
| MAN2<br>A2   | 2642.1<br>83079 | 1729.53203  | 3554.834128 | 2.0553<br>734   | 1.039400<br>512     | 0.0258<br>7463  | 0.2110<br>09242 | Up       |
| MAOA         | 1036.7<br>85704 | 1853.106185 | 220.4652228 | 0.1189<br>70637 | -<br>3.071322<br>55 | 9.16E-<br>10    | 5.59E-<br>07    | Dow<br>n |
| MAOB         | 1487.5<br>35303 | 2857.784495 | 117.2861106 | 0.0410<br>40922 | -<br>4.606793<br>05 | 0.0153<br>64412 | 0.1565<br>86792 | Dow<br>n |
| MAP1A        | 2942.5<br>37652 | 5542.087536 | 342.9877691 | 0.0618<br>8783  | -<br>4.014200<br>46 | 0.0006<br>74049 | 0.0190<br>88188 | Dow<br>n |
| MAP1B        | 5139.8<br>34323 | 9576.195105 | 703.4735409 | 0.0734<br>60653 | -<br>3.766884<br>48 | 0.0065<br>64621 | 0.0891<br>03985 | Dow<br>n |
| MAP1L<br>C3C | 19.423<br>52107 | 34.05623235 | 4.790809797 | 0.1406<br>73512 | -<br>2.829577<br>4  | 0.0080<br>49897 | 0.1023<br>34097 | Dow<br>n |
| MAP3K<br>7CL | 75.655<br>69545 | 119.4889201 | 31.82247083 | 0.2663<br>2152  | -<br>1.908759<br>08 | 0.0017<br>99563 | 0.0371<br>11403 | Dow<br>n |
| MAP3K<br>9   | 83.847<br>5332  | 47.01679425 | 120.6782721 | 2.5667<br>05665 | 1.359917<br>865     | 0.0398<br>72564 | 0.2696<br>40422 | Up       |
| MAP4K<br>1   | 192.58<br>61721 | 114.1115481 | 271.060796  | 2.3754<br>01968 | 1.248171<br>669     | 0.0199<br>77667 | 0.1835<br>18446 | Up       |
| MAP7         | 1058.5<br>39999 | 482.8748862 | 1634.205112 | 3.3843<br>24095 | 1.758867<br>733     | 0.0077<br>44077 | 0.0997<br>0439  | Up       |
| MAP7D<br>1   | 2020.7<br>90164 | 2733.547048 | 1308.03328  | 0.4785<br>11347 | -<br>1.063374<br>96 | 0.0147<br>22286 | 0.1524<br>54255 | Dow<br>n |
| MAP7D<br>3   | 941.42<br>10177 | 1436.583332 | 446.258703  | 0.3106<br>38926 | -<br>1.686689<br>47 | 0.0002<br>52453 | 0.0099<br>14059 | Dow<br>n |



|          |             |             |             |             |             |             |             |      |
|----------|-------------|-------------|-------------|-------------|-------------|-------------|-------------|------|
| MAPK13   | 1685.278812 | 301.8642999 | 3068.693325 | 10.16580406 | 3.345652424 | 0.032578307 | 0.242405147 | Up   |
| MAPK15   | 351.938964  | 172.4844915 | 531.3934365 | 3.08081864  | 1.623313757 | 0.018178187 | 0.173225737 | Up   |
| MAPK6    | 1256.715267 | 1694.719106 | 818.7114283 | 0.48309565  | -1.04961923 | 0.024834855 | 0.206449747 | Down |
| MAPK8IP2 | 35.36707985 | 12.11510357 | 58.61905614 | 4.838510525 | 2.274563    | 0.006939585 | 0.092569328 | Up   |
| MAPRE1   | 643.1469278 | 865.6277683 | 420.6660873 | 0.485966489 | -1.04107126 | 0.024833624 | 0.206449747 | Down |
| MARCKSL1 | 1163.711286 | 651.7795561 | 1675.643016 | 2.570873849 | 1.36225882  | 0.001416471 | 0.031860004 | Up   |
| MARVELD1 | 3632.897042 | 5917.291973 | 1348.50211  | 0.227891765 | -2.1335793  | 0.002913743 | 0.051329115 | Down |
| MARVELD3 | 139.5688157 | 33.24309261 | 245.8945389 | 7.39686111  | 2.886913187 | 0.013825907 | 0.145866049 | Up   |
| MASTL    | 50.1555223  | 77.61795951 | 22.69308508 | 0.292368998 | -1.77413775 | 0.013200204 | 0.142075464 | Down |
| MATK     | 367.6808954 | 158.1974543 | 577.1643365 | 3.648379419 | 1.867255773 | 8.04E-05    | 0.004250564 | Up   |
| MATN4    | 46.73784863 | 83.13906422 | 10.33663304 | 0.124329437 | -3.00776018 | 0.000129428 | 0.006144093 | Down |
| MBNL1    | 4082.079058 | 5832.183847 | 2331.97427  | 0.399845809 | -1.32248433 | 0.008402855 | 0.105038    | Down |
| MCAM     | 6683.392539 | 11592.50664 | 1774.278437 | 0.153053907 | -2.70788822 | 1.64E-07    | 3.56E-05    | Down |
| MCF2     | 200.7804924 | 35.78322039 | 365.7777643 | 10.2220471  | 3.353612239 | 0.013628508 | 0.144784205 | Up   |
| MCM10    | 162.4894021 | 227.4663053 | 97.51249897 | 0.428689862 | -1.2219938  | 0.018652614 | 0.176072474 | Down |
| ME1      | 312.5300933 | 512.8205194 | 112.2396671 | 0.218867348 | -2.19187135 | 0.000356551 | 0.012636184 | Down |
| ME3      | 254.2911268 | 376.6475808 | 131.9346728 | 0.350286792 | -1.5133915  | 0.022776612 | 0.196854819 | Down |

|           |                 |             |             |                 |                     |                 |                 |      |
|-----------|-----------------|-------------|-------------|-----------------|---------------------|-----------------|-----------------|------|
| MECR      | 406.16<br>37143 | 233.6182834 | 578.7091452 | 2.4771<br>5691  | 1.308685<br>256     | 0.0307<br>31039 | 0.2349<br>96699 | Up   |
| MEDAG     | 1853.0<br>37192 | 3494.583641 | 211.4907418 | 0.0605<br>19582 | -<br>4.046454<br>16 | 2.28E-<br>08    | 7.36E-<br>06    | Down |
| MEF2D     | 685.34<br>15501 | 940.9641194 | 429.7189807 | 0.4566<br>79454 | -<br>1.130746<br>21 | 0.0153<br>19363 | 0.1562<br>15935 | Down |
| MEGF10    | 250.53<br>34359 | 83.19248964 | 417.8743822 | 5.0229<br>8205  | 2.328544<br>12      | 0.0221<br>32964 | 0.1937<br>19813 | Up   |
| MEGF6     | 692.44<br>87875 | 1189.544448 | 195.353127  | 0.1642<br>2516  | -<br>2.606252<br>93 | 0.0055<br>95625 | 0.0795<br>80762 | Down |
| MEOX2     | 965.66<br>74203 | 1403.253938 | 528.080903  | 0.3763<br>25973 | -<br>1.409945<br>23 | 0.0010<br>52136 | 0.0263<br>2382  | Down |
| MEP1A     | 5.9149<br>0134  | 11.82980268 | 0           | 0               | #NAME<br>?          | 0.0387<br>38001 | 0.2653<br>98711 | Down |
| MESDC1    | 255.44<br>31592 | 343.5723706 | 167.3139479 | 0.4869<br>83129 | -<br>1.038056<br>3  | 0.0270<br>19574 | 0.2166<br>24931 | Down |
| METTL9    | 3119.8<br>34243 | 1867.950974 | 4371.717512 | 2.3403<br>81291 | 1.226743<br>59      | 0.0323<br>78595 | 0.2417<br>53919 | Up   |
| MFAP2     | 1588.2<br>40778 | 2759.995135 | 416.4864214 | 0.1509<br>01143 | -<br>2.728324<br>36 | 0.0174<br>80736 | 0.1690<br>80427 | Down |
| MFAP5     | 5199.4<br>02082 | 9723.74868  | 675.0554835 | 0.0694<br>23378 | -<br>3.848434<br>62 | 4.42E-<br>05    | 0.0027<br>5862  | Down |
| MFHAS1    | 522.23<br>54051 | 828.0840498 | 216.3867604 | 0.2613<br>10142 | -<br>1.936164<br>98 | 0.0131<br>91197 | 0.1420<br>63281 | Down |
| MFSD6     | 1297.4<br>79986 | 696.1942797 | 1898.765692 | 2.7273<br>5032  | 1.447500<br>022     | 0.0017<br>21319 | 0.0365<br>56461 | Up   |
| MFSD6L    | 82.204<br>39411 | 42.65697059 | 121.7518176 | 2.8542<br>0685  | 1.513089<br>893     | 0.0118<br>48468 | 0.1326<br>47766 | Up   |
| MGAT5B    | 50.754<br>3599  | 26.95487773 | 74.55384207 | 2.7658<br>75728 | 1.467736<br>337     | 0.0291<br>55202 | 0.2274<br>78671 | Up   |
| MGC126945 | 336.04<br>2768  | 140.8700105 | 531.2155255 | 3.7709<br>6249  | 1.914932<br>8       | 0.0001<br>55888 | 0.0070<br>25544 | Up   |
| MGC138914 | 5.4667<br>09161 | 0.333045233 | 10.60037309 | 31.828<br>62873 | 4.992253<br>098     | 0.0199<br>8061  | 0.1835<br>18446 | Up   |
| MGC151921 | 6906.5<br>71812 | 306.2628863 | 13506.88074 | 44.102<br>24464 | 5.462780<br>18      | 0.0005<br>042   | 0.0156<br>81493 | Up   |

|         |                 |             |             |                 |                     |                 |                 |      |
|---------|-----------------|-------------|-------------|-----------------|---------------------|-----------------|-----------------|------|
| MGME1   | 318.34<br>88598 | 209.5719893 | 427.1257303 | 2.0380<br>85966 | 1.027214<br>906     | 0.0357<br>24041 | 0.2539<br>1239  | Up   |
| MGP     | 10146.<br>67768 | 16344.82654 | 3948.528823 | 0.2415<br>76673 | -<br>2.049446<br>94 | 0.0198<br>04898 | 0.1825<br>55215 | Down |
| MGST1   | 3099.9<br>24897 | 2048.734763 | 4151.115031 | 2.0261<br>847   | 1.018765<br>691     | 0.0303<br>45354 | 0.2331<br>34516 | Up   |
| MIA     | 595.49<br>54172 | 211.9445476 | 979.0462868 | 4.6193<br>51136 | 2.207690<br>216     | 0.0046<br>6007  | 0.0708<br>19709 | Up   |
| MICAL2  | 1070.7<br>94423 | 1611.643957 | 529.9448895 | 0.3288<br>22559 | -<br>1.604618<br>82 | 0.0109<br>49412 | 0.1255<br>15136 | Down |
| MICALL2 | 1884.4<br>16304 | 1042.715882 | 2726.116726 | 2.6144<br>38673 | 1.386501<br>229     | 0.0247<br>66268 | 0.2063<br>44811 | Up   |
| MISP    | 72.476<br>89411 | 21.04124847 | 123.9125398 | 5.8890<br>29822 | 2.558029<br>979     | 9.11E-<br>05    | 0.0046<br>80247 | Up   |
| MITF    | 558.84<br>79477 | 872.5502003 | 245.1456952 | 0.2809<br>53113 | -<br>1.831598<br>71 | 0.0028<br>22399 | 0.0504<br>09164 | Down |
| MKS1    | 327.47<br>55106 | 195.3852985 | 459.5657227 | 2.3520<br>99805 | 1.233949<br>278     | 0.0280<br>04047 | 0.2213<br>16369 | Up   |
| MKX     | 377.10<br>72509 | 504.634412  | 249.5800897 | 0.4945<br>76041 | -<br>1.015735<br>74 | 0.0345<br>08552 | 0.2493<br>98946 | Down |
| MLKL    | 116.72<br>89284 | 157.536938  | 75.92091884 | 0.4819<br>24556 | -<br>1.053120<br>78 | 0.0192<br>26466 | 0.1792<br>59742 | Down |
| MLLT11  | 241.19<br>59322 | 360.9429006 | 121.4489637 | 0.3364<br>76943 | -<br>1.571420<br>45 | 0.0017<br>77638 | 0.0368<br>45281 | Down |
| MLPH    | 307.21<br>42607 | 82.36452149 | 532.064     | 6.4598<br>68768 | 2.691504<br>857     | 0.0025<br>99077 | 0.0473<br>21709 | Up   |
| MME     | 1271.9<br>3924  | 671.6807181 | 1872.197762 | 2.7873<br>32897 | 1.478885<br>317     | 0.0078<br>43617 | 0.1007<br>05347 | Up   |
| MMP12   | 128.87<br>55623 | 2.997407101 | 254.7537176 | 84.991<br>36386 | 6.409244<br>348     | 0.0007<br>26964 | 0.0202<br>99842 | Up   |
| MMP14   | 2860.1<br>79661 | 3963.792849 | 1756.566474 | 0.4431<br>52945 | -<br>1.174123<br>39 | 0.0209<br>78894 | 0.1884<br>01543 | Down |
| MMP16   | 220.80<br>89358 | 411.2862861 | 30.33158551 | 0.0737<br>48108 | -<br>3.761250<br>15 | 0.0018<br>70741 | 0.0380<br>75    | Down |
| MMP2    | 19092.<br>07873 | 32661.06564 | 5523.091831 | 0.1691<br>03234 | -<br>2.564023       | 0.0012<br>64575 | 0.0295<br>48792 | Down |

|            |                 |             |             |                 |                     |                 |                 |          |
|------------|-----------------|-------------|-------------|-----------------|---------------------|-----------------|-----------------|----------|
|            |                 |             |             |                 | 84                  |                 |                 |          |
| MMP23<br>B | 773.50<br>44304 | 1296.106525 | 250.9023354 | 0.1935<br>81569 | -<br>2.368986<br>49 | 0.0012<br>19443 | 0.0289<br>06077 | Dow<br>n |
| MMP27      | 123.10<br>41599 | 245.4081037 | 0.80021608  | 0.0032<br>60757 | -<br>8.260577<br>56 | 0.0207<br>62201 | 0.1876<br>39952 | Dow<br>n |
| MMP28      | 457.15<br>42842 | 728.8947517 | 185.4138167 | 0.2543<br>76666 | -<br>1.974961<br>76 | 0.0064<br>13042 | 0.0879<br>72275 | Dow<br>n |
| MMP9       | 232.11<br>96127 | 4.561626042 | 459.6775994 | 100.77<br>05575 | 6.654930<br>373     | 5.39E-<br>05    | 0.0031<br>99928 | Up       |
| MMRN<br>1  | 689.71<br>54139 | 1287.489457 | 91.94137107 | 0.0714<br>11358 | -<br>3.807702<br>63 | 1.73E-<br>13    | 2.61E-<br>10    | Dow<br>n |
| MN1        | 472.28<br>9843  | 897.3260583 | 47.25362773 | 0.0526<br>60488 | -<br>4.247135<br>31 | 0.0008<br>112   | 0.0217<br>95968 | Dow<br>n |
| MOB1A      | 757.97<br>96817 | 1043.388525 | 472.570838  | 0.4529<br>19336 | -<br>1.142673<br>96 | 0.0176<br>20386 | 0.1700<br>66421 | Dow<br>n |
| MOK        | 99.451<br>61074 | 58.756913   | 140.1463085 | 2.3851<br>8842  | 1.254103<br>238     | 0.0380<br>00033 | 0.2626<br>37007 | Up       |
| MORC4      | 329.79<br>7353  | 449.3180118 | 210.2766942 | 0.4679<br>90796 | -<br>1.095447<br>94 | 0.0207<br>24321 | 0.1875<br>79538 | Dow<br>n |
| MPEG1      | 1266.2<br>49215 | 694.3645757 | 1838.133854 | 2.6472<br>17209 | 1.404476<br>575     | 0.0032<br>24528 | 0.0550<br>13076 | Up       |
| MPPE1      | 843.40<br>51396 | 551.3513959 | 1135.458883 | 2.0594<br>10553 | 1.042231<br>467     | 0.0219<br>29086 | 0.1924<br>95758 | Up       |
| MPPED<br>2 | 79.481<br>21752 | 33.98015428 | 124.9822808 | 3.6780<br>96331 | 1.878959<br>265     | 0.0101<br>7318  | 0.1197<br>87204 | Up       |
| MPZ        | 48.109<br>67855 | 96.21935711 | 0           | 0               | #NAME<br>?          | 0.0475<br>42066 | 0.2974<br>13932 | Dow<br>n |
| MPZL2      | 61.002<br>67314 | 22.71713713 | 99.28820916 | 4.3706<br>30357 | 2.127841<br>368     | 0.0010<br>67366 | 0.0265<br>20948 | Up       |
| MPZL3      | 506.11<br>51958 | 313.4190386 | 698.8113529 | 2.2296<br>39131 | 1.156810<br>228     | 0.0274<br>98052 | 0.2189<br>47782 | Up       |
| MRAP2      | 35.317<br>41878 | 52.04615003 | 18.58868753 | 0.3571<br>57783 | -<br>1.485366<br>54 | 0.0175<br>84064 | 0.1698<br>97656 | Dow<br>n |
| MRAS       | 708.32<br>44906 | 1118.316071 | 298.33291   | 0.2667<br>6976  | -<br>1.906332<br>96 | 0.0148<br>65151 | 0.1536<br>69028 | Dow<br>n |

|              |                 |             |             |                 |                     |                 |                 |          |
|--------------|-----------------|-------------|-------------|-----------------|---------------------|-----------------|-----------------|----------|
| MRC2         | 6967.5<br>88144 | 12247.39524 | 1687.781048 | 0.1378<br>07347 | -<br>2.859275<br>29 | 0.0042<br>13796 | 0.0656<br>41338 | Dow<br>n |
| MRGPR<br>F   | 880.42<br>1044  | 1562.70715  | 198.1349379 | 0.1267<br>89551 | -<br>2.979492<br>24 | 0.0067<br>52439 | 0.0906<br>80552 | Dow<br>n |
| MRO          | 31.394<br>72528 | 52.03914126 | 10.7503093  | 0.2065<br>8122  | -<br>2.275218<br>99 | 0.0146<br>7643  | 0.1520<br>66696 | Dow<br>n |
| MROH2<br>B   | 73.959<br>79707 | 1.330048437 | 146.5895457 | 110.21<br>36897 | 6.784159<br>623     | 0.0422<br>18174 | 0.2771<br>25457 | Up       |
| MRV11        | 2638.7<br>32671 | 4645.152465 | 632.3128768 | 0.1361<br>2317  | -<br>2.877015<br>45 | 0.0186<br>36418 | 0.1760<br>11696 | Dow<br>n |
| MS4A8        | 186.00<br>04229 | 112.7122493 | 259.2885964 | 2.3004<br>47361 | 1.201914<br>445     | 0.0110<br>08728 | 0.1258<br>46925 | Up       |
| M-<br>SAA3.2 | 5890.1<br>85656 | 441.4310698 | 11338.94024 | 25.686<br>77426 | 4.682953<br>823     | 9.00E-<br>19    | 5.41E-<br>15    | Up       |
| MSI1         | 17.873<br>35262 | 6.846058747 | 28.90064649 | 4.2215<br>01386 | 2.077756<br>188     | 0.0496<br>58242 | 0.3045<br>85187 | Up       |
| MSI2         | 1231.5<br>83861 | 733.5814274 | 1729.586294 | 2.3577<br>29122 | 1.237397<br>977     | 0.0361<br>41368 | 0.2556<br>68289 | Up       |
| MSN          | 7661.9<br>27944 | 11253.84599 | 4070.009901 | 0.3616<br>5502  | -<br>1.467313<br>92 | 0.0012<br>43475 | 0.0293<br>98479 | Dow<br>n |
| MSRB3        | 2868.3<br>85247 | 4520.409742 | 1216.360752 | 0.2690<br>81968 | -<br>1.893882<br>38 | 0.0381<br>37243 | 0.2629<br>59243 | Dow<br>n |
| MSX1         | 204.92<br>03079 | 355.3307704 | 54.50984533 | 0.1534<br>05924 | -<br>2.704573<br>89 | 0.0091<br>52831 | 0.1112<br>58704 | Dow<br>n |
| MT1A         | 210.70<br>70545 | 25.62993616 | 395.7841728 | 15.442<br>26135 | 3.948812<br>13      | 0.0018<br>78634 | 0.0381<br>62925 | Up       |
| MT1E         | 96.109<br>84466 | 42.43025759 | 149.7894317 | 3.5302<br>50351 | 1.819770<br>497     | 0.0024<br>8481  | 0.0461<br>59446 | Up       |
| MTCL1        | 332.86<br>95664 | 536.6136302 | 129.1255026 | 0.2406<br>30307 | -<br>2.055109<br>74 | 0.0062<br>0223  | 0.0859<br>30895 | Dow<br>n |
| MTHFD<br>1L  | 338.71<br>06815 | 460.1835105 | 217.2378526 | 0.4720<br>67876 | -<br>1.082933<br>78 | 0.0345<br>75256 | 0.2496<br>50201 | Dow<br>n |
| MTMR<br>11   | 508.75<br>00756 | 679.5689047 | 337.9312466 | 0.4972<br>72969 | -<br>1.007890<br>09 | 0.0291<br>25338 | 0.2274<br>30909 | Dow<br>n |

|         |                 |             |             |                 |                     |                 |                 |      |
|---------|-----------------|-------------|-------------|-----------------|---------------------|-----------------|-----------------|------|
| MTMR7   | 71.502<br>97353 | 127.1349119 | 15.87103514 | 0.1248<br>36167 | -<br>3.001892<br>12 | 0.0024<br>16046 | 0.0454<br>89269 | Down |
| MTPN    | 835.54<br>78064 | 1184.416946 | 486.6786672 | 0.4109<br>01473 | -<br>1.283135<br>59 | 0.0099<br>89229 | 0.1183<br>16285 | Down |
| MTSS1   | 2469.1<br>82201 | 1618.151063 | 3320.213339 | 2.0518<br>5623  | 1.036929<br>647     | 0.0366<br>15412 | 0.2580<br>0993  | Up   |
| MUC16   | 1814.7<br>64481 | 20.82537902 | 3608.703583 | 173.28<br>3933  | 7.436994<br>083     | 0.0141<br>4759  | 0.1482<br>90752 | Up   |
| MUSTN1  | 1588.3<br>89942 | 2939.570107 | 237.209777  | 0.0806<br>95397 | -<br>3.631369<br>81 | 0.0208<br>89133 | 0.1882<br>61267 | Down |
| MXRA5   | 6501.5<br>1639  | 10963.94113 | 2039.091647 | 0.1859<br>8163  | -<br>2.426767<br>96 | 0.0114<br>09222 | 0.1291<br>16037 | Down |
| MXRA7   | 3924.9<br>78929 | 6916.083241 | 933.8746183 | 0.1350<br>29407 | -<br>2.888654<br>46 | 0.0045<br>26518 | 0.0693<br>15676 | Down |
| MXRA8   | 1863.4<br>23475 | 2745.180381 | 981.6665689 | 0.3575<br>96381 | -<br>1.483595<br>96 | 0.0025<br>52983 | 0.0469<br>93118 | Down |
| MYADM   | 6349.3<br>38285 | 9506.513725 | 3192.162845 | 0.3357<br>86908 | -<br>1.574382<br>11 | 0.0003<br>89135 | 0.0133<br>57214 | Down |
| MYB     | 427.37<br>27598 | 62.95077505 | 791.7947446 | 12.577<br>99835 | 3.652830<br>446     | 0.0054<br>48755 | 0.0785<br>59686 | Up   |
| MYBPC1  | 467.77<br>93782 | 14.74088089 | 920.8178754 | 62.466<br>95039 | 5.965021<br>195     | 0.0414<br>44948 | 0.2743<br>57952 | Up   |
| MYBPH   | 364.55<br>38818 | 93.6221887  | 635.4855749 | 6.7877<br>66701 | 2.762936<br>98      | 0.0008<br>24866 | 0.0219<br>78973 | Up   |
| MYCBPAP | 109.87<br>56092 | 39.30651491 | 180.4447036 | 4.5907<br>07266 | 2.198716<br>439     | 0.0004<br>37225 | 0.0143<br>78031 | Up   |
| MYCL    | 68.735<br>97068 | 36.53582081 | 100.9361205 | 2.7626<br>61911 | 1.466059<br>019     | 0.0441<br>80029 | 0.2847<br>78169 | Up   |
| MYCT1   | 656.56<br>00945 | 908.0136729 | 405.1065161 | 0.4461<br>45833 | -<br>1.164412<br>73 | 0.0196<br>7618  | 0.1821<br>4499  | Down |
| MYH10   | 4081.1<br>88778 | 6213.716794 | 1948.660762 | 0.3136<br>06305 | -<br>1.672973<br>53 | 0.0064<br>24403 | 0.0879<br>95293 | Down |
| MYH14   | 778.60<br>69086 | 346.2858697 | 1210.927948 | 3.4969<br>0257  | 1.806077<br>6       | 0.0013<br>37978 | 0.0307<br>36638 | Up   |
| MYH7B   | 83.303          | 26.16861857 | 140.4378965 | 5.3666          | 2.424022            | 0.0012          | 0.0300          | Up   |

|            |                 |             |             |                 |                     |                 |                 |          |
|------------|-----------------|-------------|-------------|-----------------|---------------------|-----------------|-----------------|----------|
|            | 25755           |             |             | 53045           | 621                 | 89826           | 22151           |          |
| MYL4       | 45.629<br>85332 | 70.73783035 | 20.52187629 | 0.2901<br>11758 | -<br>1.785319<br>33 | 0.0212<br>7142  | 0.1893<br>01998 | Dow<br>n |
| MYL5       | 89.410<br>27642 | 38.3163394  | 140.5042134 | 3.6669<br>5294  | 1.874581<br>751     | 0.0032<br>94547 | 0.0555<br>94325 | Up       |
| MYL6       | 21269.<br>23364 | 31847.89652 | 10690.57076 | 0.3356<br>75882 | -<br>1.574859<br>21 | 0.0233<br>76454 | 0.1994<br>73917 | Dow<br>n |
| MYL9       | 29804.<br>42705 | 54782.92354 | 4825.930549 | 0.0880<br>91877 | -<br>3.504847<br>2  | 0.0140<br>73907 | 0.1476<br>90057 | Dow<br>n |
| MYLK       | 14071.<br>27635 | 25713.74894 | 2428.80376  | 0.0944<br>55451 | -<br>3.404222<br>13 | 0.0145<br>33987 | 0.1511<br>98722 | Dow<br>n |
| MYO18<br>B | 11.107<br>62011 | 21.84012155 | 0.375118671 | 0.0171<br>75668 | -5.86349            | 0.0150<br>71849 | 0.1549<br>50462 | Dow<br>n |
| MYO3<br>A  | 297.20<br>77002 | 21.34533017 | 573.0700702 | 26.847<br>56177 | 4.746719<br>167     | 0.0007<br>47932 | 0.0206<br>71255 | Up       |
| MYO5B      | 653.91<br>80687 | 226.5296992 | 1081.306438 | 4.7733<br>53967 | 2.255003<br>323     | 1.20E-<br>05    | 0.0009<br>82075 | Up       |
| MYOC<br>D  | 1241.5<br>12253 | 2305.277216 | 177.7472902 | 0.0771<br>04519 | -<br>3.697040<br>78 | 0.0049<br>66397 | 0.0741<br>62945 | Dow<br>n |
| MYOZ1      | 64.345<br>78537 | 32.2599444  | 96.43162635 | 2.9892<br>06217 | 1.579762<br>428     | 0.0478<br>7625  | 0.2985<br>59455 | Up       |
| MYRF       | 177.75<br>15131 | 307.9266095 | 47.57641676 | 0.1545<br>05701 | -<br>2.694268<br>02 | 6.11E-<br>06    | 0.0005<br>77382 | Dow<br>n |
| MYRFL      | 23.561<br>43026 | 8.90291804  | 38.21994247 | 4.2929<br>68025 | 2.101975<br>427     | 0.0331<br>61534 | 0.2440<br>64017 | Up       |
| NACC2      | 212.37<br>32071 | 311.5714128 | 113.1750014 | 0.3632<br>39363 | -<br>1.461007<br>55 | 0.0189<br>13423 | 0.1776<br>05018 | Dow<br>n |
| NAPRT      | 2350.5<br>17334 | 1430.478716 | 3270.555951 | 2.2863<br>36674 | 1.193037<br>863     | 0.0210<br>6993  | 0.1885<br>20321 | Up       |
| NBEAL<br>1 | 235.68<br>13995 | 391.4350148 | 79.92778411 | 0.2041<br>91708 | -<br>2.292003<br>82 | 0.0002<br>15462 | 0.0088<br>33462 | Dow<br>n |
| NCALD      | 493.16<br>14249 | 752.5926875 | 233.7301622 | 0.3105<br>66613 | -<br>1.687025<br>35 | 0.0010<br>91774 | 0.0270<br>12915 | Dow<br>n |
| NCAM1      | 471.64<br>52118 | 938.4972258 | 4.793197851 | 0.0051<br>07312 | -<br>7.613220       | 0.0022<br>56508 | 0.0435<br>34923 | Dow<br>n |

|              |                 |             |             |                 |                     |                 |                 |          |
|--------------|-----------------|-------------|-------------|-----------------|---------------------|-----------------|-----------------|----------|
|              |                 |             |             |                 | 18                  |                 |                 |          |
| NCS1         | 444.82<br>83608 | 794.6167202 | 95.04000132 | 0.1196<br>04835 | -<br>3.063652<br>39 | 0.0001<br>46814 | 0.0067<br>04744 | Dow<br>n |
| NDN          | 238.73<br>62871 | 322.84205   | 154.6305242 | 0.4789<br>66492 | -<br>1.062003<br>36 | 0.0384<br>33082 | 0.2643<br>13518 | Dow<br>n |
| NDNF         | 548.63<br>15708 | 223.1886385 | 874.0745032 | 3.9163<br>03755 | 1.969492<br>667     | 0.0104<br>10374 | 0.1216<br>96857 | Up       |
| NDST3        | 25.652<br>60541 | 40.62869417 | 10.67651665 | 0.2627<br>82668 | -<br>1.928057<br>97 | 0.0181<br>42909 | 0.1730<br>83126 | Dow<br>n |
| NDUFA<br>4L2 | 305.11<br>22782 | 499.9752952 | 110.2492611 | 0.2205<br>09418 | -<br>2.181087<br>82 | 0.0001<br>07967 | 0.0053<br>50588 | Dow<br>n |
| NECAB<br>2   | 111.21<br>23842 | 153.9113827 | 68.51338574 | 0.4451<br>4827  | -<br>1.167642<br>15 | 0.0414<br>3389  | 0.2743<br>57952 | Dow<br>n |
| NECAB<br>3   | 197.39<br>45006 | 291.2563964 | 103.5326048 | 0.3554<br>68948 | -<br>1.492204<br>56 | 0.0103<br>18335 | 0.1209<br>14327 | Dow<br>n |
| NEDD4        | 691.38<br>6307  | 935.2808772 | 447.4917369 | 0.4784<br>57058 | -<br>1.063538<br>65 | 0.0165<br>33313 | 0.1633<br>93505 | Dow<br>n |
| NEDD4<br>L   | 1479.4<br>4356  | 703.0476042 | 2255.839516 | 3.2086<br>5828  | 1.681970<br>152     | 0.0002<br>22437 | 0.0090<br>37243 | Up       |
| NEFM         | 259.97<br>22397 | 55.77441484 | 464.1700646 | 8.3222<br>75831 | 3.056978<br>105     | 0.0335<br>0762  | 0.2455<br>09326 | Up       |
| NEK6         | 3129.6<br>92087 | 2010.176193 | 4249.20798  | 2.1138<br>48525 | 1.079871<br>999     | 0.0125<br>99092 | 0.1379<br>09603 | Up       |
| NEURL<br>1   | 460.93<br>56003 | 69.07215544 | 852.7990452 | 12.346<br>49534 | 3.626029<br>673     | 0.0032<br>36541 | 0.0550<br>69611 | Up       |
| NEXN         | 1860.7<br>88033 | 3519.97421  | 201.601856  | 0.0572<br>73674 | -<br>4.125984<br>03 | 0.0036<br>86011 | 0.0599<br>02665 | Dow<br>n |
| NFATC<br>4   | 1116.3<br>22294 | 1718.78103  | 513.8635575 | 0.2989<br>69763 | -<br>1.741928<br>51 | 0.0005<br>54487 | 0.0165<br>98835 | Dow<br>n |
| NFE2L3       | 382.10<br>07243 | 140.1477897 | 624.0536589 | 4.4528<br>25552 | 2.154721<br>093     | 0.0041<br>11257 | 0.0649<br>00685 | Up       |
| NFIC         | 785.99<br>27298 | 1075.558113 | 496.427347  | 0.4615<br>53254 | -<br>1.115430<br>98 | 0.0172<br>14923 | 0.1674<br>82917 | Dow<br>n |
| NHS          | 224.46          | 367.8926099 | 81.03559305 | 0.2202          | -                   | 0.0001          | 0.0063          | Dow      |



|            |                 |             |             |                 |                     |                 |                 |      |
|------------|-----------------|-------------|-------------|-----------------|---------------------|-----------------|-----------------|------|
|            | 41015           |             |             | 69695           | 2.182657<br>07      | 35557           | 18647           | n    |
| NHSL1      | 948.86<br>40571 | 467.6009509 | 1430.127163 | 3.0584<br>35105 | 1.612793<br>665     | 0.0002<br>52139 | 0.0099<br>14059 | Up   |
| NHSL2      | 1415.9<br>97331 | 2390.954417 | 441.0402447 | 0.1844<br>62005 | -<br>2.438604<br>41 | 0.0001<br>13902 | 0.0055<br>68226 | Down |
| NID1       | 6051.5<br>68273 | 9835.816674 | 2267.319872 | 0.2305<br>16687 | -<br>2.117056<br>91 | 0.0022<br>6613  | 0.0436<br>27237 | Down |
| NID2       | 3342.7<br>52499 | 5285.543874 | 1399.961124 | 0.2648<br>66049 | -<br>1.916665<br>17 | 3.87E-<br>05    | 0.0025<br>28054 | Down |
| NIM1K      | 40.675<br>84374 | 19.44935661 | 61.90233086 | 3.1827<br>44401 | 1.670271<br>302     | 0.0376<br>08639 | 0.2623<br>50059 | Up   |
| NIPA1      | 63.356<br>52579 | 94.96952772 | 31.74352386 | 0.3342<br>49571 | -<br>1.581002<br>39 | 0.0393<br>05284 | 0.2677<br>59823 | Down |
| NIPAL4     | 100.51<br>20287 | 169.1326073 | 31.89145022 | 0.1885<br>58852 | -<br>2.406913<br>22 | 0.0030<br>38485 | 0.0527<br>55762 | Down |
| NKAIN<br>1 | 38.377<br>49603 | 67.96310186 | 8.791890196 | 0.1293<br>62698 | -<br>2.950506<br>43 | 0.0100<br>24429 | 0.1184<br>99792 | Down |
| NKAIN<br>3 | 99.867<br>67967 | 164.7101553 | 35.02520408 | 0.2126<br>47508 | -<br>2.233464<br>15 | 0.0001<br>7619  | 0.0076<br>04902 | Down |
| NKG7       | 389.78<br>56156 | 197.0662816 | 582.5049496 | 2.9558<br>83395 | 1.563589<br>359     | 0.0006<br>77356 | 0.0191<br>51771 | Up   |
| NKPD1      | 345.26<br>38048 | 143.4509868 | 547.0766228 | 3.8136<br>8323  | 1.931185<br>016     | 6.76E-<br>05    | 0.0038<br>37125 | Up   |
| NKX2-2     | 17.360<br>74047 | 34.72148094 | 0           | 0               | #NAME<br>?          | 0.0008<br>42978 | 0.0223<br>62471 | Down |
| NKX3-1     | 22.477<br>45215 | 1.572318722 | 43.38258557 | 27.591<br>47046 | 4.786150<br>44      | 1.10E-<br>05    | 0.0009<br>14247 | Up   |
| NLGN4<br>X | 4.1334<br>41066 | 8.266882132 | 0           | 0               | #NAME<br>?          | 0.0400<br>89687 | 0.2701<br>26271 | Down |
| NLRP1      | 168.16<br>60195 | 93.83293274 | 242.4991063 | 2.5843<br>70959 | 1.369813<br>168     | 0.0089<br>39363 | 0.1098<br>35862 | Up   |
| NMB        | 215.01<br>82669 | 399.9825348 | 30.05399911 | 0.0751<br>38279 | -<br>3.734308<br>13 | 4.04E-<br>11    | 3.47E-<br>08    | Down |
| NME8       | 36.796<br>46744 | 17.16083998 | 56.4320949  | 3.2884<br>22651 | 1.717395<br>736     | 0.0334<br>44636 | 0.2453<br>03316 | Up   |

|             |                 |             |             |                 |                     |                 |                 |      |
|-------------|-----------------|-------------|-------------|-----------------|---------------------|-----------------|-----------------|------|
| NMT2        | 185.62<br>79595 | 264.809136  | 106.446783  | 0.4019<br>75493 | -<br>1.314820<br>55 | 0.0197<br>20873 | 0.1822<br>46329 | Down |
| NOL3        | 337.53<br>93416 | 499.3434915 | 175.7351917 | 0.3519<br>32477 | -<br>1.506629<br>44 | 0.0319<br>28679 | 0.2396<br>91518 | Down |
| NOSTR<br>IN | 816.92<br>89396 | 298.7307163 | 1335.127163 | 4.4693<br>33383 | 2.160059<br>664     | 0.0232<br>91998 | 0.1991<br>30023 | Up   |
| NOV         | 9564.4<br>13372 | 18610.30017 | 518.5265752 | 0.0278<br>62343 | -<br>5.165539<br>58 | 0.0083<br>83119 | 0.1049<br>01752 | Down |
| NOVA1       | 43.816<br>92574 | 76.25614175 | 11.37770972 | 0.1492<br>03847 | -<br>2.744643<br>36 | 0.0009<br>84146 | 0.0250<br>74884 | Down |
| NOVA2       | 70.567<br>72768 | 103.0759358 | 38.05951958 | 0.3692<br>37682 | -<br>1.437378<br>3  | 0.0257<br>69212 | 0.2108<br>16694 | Down |
| NOX4        | 165.03<br>47288 | 297.7051784 | 32.36427924 | 0.1087<br>12517 | -<br>3.201410<br>04 | 3.71E-<br>06    | 0.0004<br>0099  | Down |
| NOXA1       | 642.65<br>58734 | 237.0107592 | 1048.300988 | 4.4230<br>10124 | 2.145028<br>544     | 7.71E-<br>06    | 0.0006<br>95823 | Up   |
| NPAS3       | 145.21<br>53283 | 60.212237   | 230.2184197 | 3.8234<br>49038 | 1.934874<br>645     | 0.0004<br>63244 | 0.0147<br>82042 | Up   |
| NPAS4       | 19.071<br>47499 | 37.95539064 | 0.187559335 | 0.0049<br>41573 | -<br>7.660813<br>92 | 0.0054<br>902   | 0.0789<br>14511 | Down |
| NPPB        | 12.018<br>63924 | 22.811965   | 1.225313489 | 0.0537<br>13632 | -<br>4.218567<br>92 | 0.0344<br>86558 | 0.2493<br>4421  | Down |
| NPPC        | 11.080<br>03851 | 20.56203291 | 1.598044106 | 0.0777<br>18196 | -<br>3.685603<br>77 | 0.0435<br>68487 | 0.2824<br>58939 | Down |
| NPR1        | 974.08<br>15515 | 1368.504577 | 579.658526  | 0.4235<br>70762 | -<br>1.239325<br>09 | 0.0025<br>63539 | 0.0471<br>39324 | Down |
| NPR3        | 147.48<br>83088 | 286.2232849 | 8.753332607 | 0.0305<br>82182 | -<br>5.031164<br>84 | 0.0046<br>10058 | 0.0701<br>77922 | Down |
| NPTN        | 1793.8<br>39259 | 2451.546973 | 1136.131545 | 0.4634<br>34541 | -<br>1.109562<br>52 | 0.0316<br>29461 | 0.2383<br>3076  | Down |
| NPY1R       | 1164.0<br>9154  | 2183.469623 | 144.713456  | 0.0662<br>76835 | -<br>3.915351       | 0.0081<br>8193  | 0.1028<br>52845 | Down |

|           |                 |             |             |                 |                     |                 |                 |          |
|-----------|-----------------|-------------|-------------|-----------------|---------------------|-----------------|-----------------|----------|
|           |                 |             |             |                 | 48                  |                 |                 |          |
| NPY5R     | 120.89<br>89943 | 228.2990488 | 13.49893977 | 0.0591<br>28322 | -<br>4.080006<br>84 | 0.0185<br>6158  | 0.1759<br>0312  | Dow<br>n |
| NR2F1     | 417.38<br>4396  | 604.5743273 | 230.1944648 | 0.3807<br>54614 | -<br>1.393066<br>57 | 0.0040<br>92025 | 0.0648<br>47586 | Dow<br>n |
| NR4A1     | 3228.0<br>49195 | 6237.306198 | 218.7921925 | 0.0350<br>77994 | -<br>4.833289<br>92 | 0.0348<br>88166 | 0.2511<br>25253 | Dow<br>n |
| NR6A1     | 146.53<br>33781 | 80.73358387 | 212.3331723 | 2.6300<br>47647 | 1.395088<br>936     | 0.0122<br>31716 | 0.1352<br>00935 | Up       |
| NRG1      | 200.49<br>15537 | 73.45494435 | 327.5281631 | 4.4588<br>98799 | 2.156687<br>456     | 6.83E-<br>05    | 0.0038<br>62836 | Up       |
| NRIP3     | 101.35<br>05771 | 183.8149452 | 18.88620906 | 0.1027<br>45775 | -<br>3.282849<br>02 | 0.0059<br>94556 | 0.0838<br>91227 | Dow<br>n |
| NRP2      | 2775.1<br>15228 | 3856.046181 | 1694.184275 | 0.4393<br>5788  | -<br>1.186531<br>53 | 0.0152<br>57211 | 0.1559<br>34744 | Dow<br>n |
| NRTN      | 37.439<br>19939 | 10.53278318 | 64.34561561 | 6.1090<br>80053 | 2.610955<br>145     | 0.0019<br>6137  | 0.0394<br>87898 | Up       |
| NRXN1     | 121.16<br>03996 | 234.5675976 | 7.753201575 | 0.0330<br>53165 | -<br>4.919067<br>75 | 0.0485<br>40967 | 0.3008<br>00584 | Dow<br>n |
| NSMF      | 1629.8<br>12609 | 999.3783694 | 2260.246848 | 2.2616<br>52761 | 1.177377<br>445     | 0.0147<br>47658 | 0.1526<br>29376 | Up       |
| NSUN7     | 106.16<br>69884 | 25.9561537  | 186.377823  | 7.1804<br>86955 | 2.844081<br>686     | 3.68E-<br>06    | 0.0003<br>99844 | Up       |
| NTF4      | 83.147<br>50175 | 29.79224097 | 136.5027625 | 4.5818<br>22585 | 2.195921<br>596     | 0.0028<br>73406 | 0.0510<br>13374 | Up       |
| NTNG2     | 245.59<br>2286  | 447.2741652 | 43.91040671 | 0.0981<br>73358 | -<br>3.348524<br>63 | 0.0162<br>59777 | 0.1614<br>25488 | Dow<br>n |
| NUAK1     | 179.06<br>67799 | 258.9530657 | 99.1804941  | 0.3830<br>05677 | -<br>1.384562<br>32 | 0.0091<br>48185 | 0.1112<br>58704 | Dow<br>n |
| NUGG<br>C | 148.77<br>60474 | 20.54244124 | 277.0096535 | 13.484<br>74849 | 3.753256<br>709     | 7.75E-<br>05    | 0.0041<br>45649 | Up       |
| NUMB<br>L | 538.07<br>13458 | 740.5786233 | 335.5640683 | 0.4531<br>10659 | -<br>1.142064<br>66 | 0.0350<br>46296 | 0.2516<br>41996 | Dow<br>n |
| NUP210    | 426.52<br>43263 | 237.3610081 | 615.6876446 | 2.5938<br>87048 | 1.375115<br>658     | 0.0032<br>42083 | 0.0550<br>69611 | Up       |

|             |                 |             |             |                 |                     |                 |                 |      |
|-------------|-----------------|-------------|-------------|-----------------|---------------------|-----------------|-----------------|------|
| NUP62<br>CL | 137.56<br>2286  | 77.6409743  | 197.4835977 | 2.5435<br>4868  | 1.346842<br>706     | 0.0169<br>29072 | 0.1655<br>19526 | Up   |
| NWD1        | 8.8756<br>63965 | 2.038327632 | 15.7130003  | 7.7087<br>70684 | 2.946500<br>812     | 0.0394<br>5951  | 0.2685<br>06265 | Up   |
| NXPE2       | 115.82<br>4819  | 3.260771751 | 228.3888663 | 70.041<br>35332 | 6.130135<br>054     | 0.0372<br>97444 | 0.2616<br>81546 | Up   |
| NXPH2       | 13.161<br>23663 | 4.495780246 | 21.82669301 | 4.8549<br>28803 | 2.279450<br>139     | 0.0452<br>39544 | 0.2892<br>11746 | Up   |
| NXPH4       | 27.075<br>21033 | 47.38738255 | 6.763038106 | 0.1427<br>18119 | -<br>2.808759<br>59 | 0.0032<br>91835 | 0.0555<br>94325 | Down |
| OAF         | 944.31<br>06437 | 1560.134525 | 328.4867628 | 0.2105<br>50281 | -<br>2.247763<br>29 | 8.04E-<br>06    | 0.0007<br>21909 | Down |
| OCLN        | 975.07<br>56212 | 518.4996581 | 1431.651584 | 2.7611<br>42774 | 1.465265<br>489     | 0.0023<br>0618  | 0.0440<br>22406 | Up   |
| ODF3B       | 9.2395<br>89107 | 2.571454423 | 15.90772379 | 6.1862<br>74838 | 2.629070<br>929     | 0.0424<br>21547 | 0.2780<br>3219  | Up   |
| OGN         | 14339.<br>16953 | 27554.46033 | 1123.878736 | 0.0407<br>87543 | -<br>4.615727<br>59 | 0.0061<br>51769 | 0.0853<br>62892 | Down |
| OLFML<br>1  | 1276.6<br>04615 | 2053.187114 | 500.0221155 | 0.2435<br>34606 | -<br>2.037801<br>3  | 0.0028<br>4626  | 0.0506<br>84774 | Down |
| OLFML<br>2B | 1373.9<br>32243 | 2572.947726 | 174.9167608 | 0.0679<br>83022 | -<br>3.878681<br>7  | 0.0006<br>89498 | 0.0194<br>03829 | Down |
| OMD         | 139.64<br>20235 | 270.4397901 | 8.844256988 | 0.0327<br>03239 | -<br>4.934422<br>68 | 0.0100<br>57301 | 0.1188<br>10517 | Down |
| OPN1L<br>W  | 35.687<br>70925 | 71.37541849 | 0           | 0               | #NAME<br>?          | 0.0119<br>52501 | 0.1331<br>56085 | Down |
| OPTC        | 31.274<br>368   | 52.59293221 | 9.955803798 | 0.1892<br>99272 | -<br>2.401259<br>23 | 0.0077<br>34712 | 0.0996<br>6176  | Down |
| OR4D9       | 6.2141<br>7253  | 12.42834506 | 0           | 0               | #NAME<br>?          | 0.0124<br>12162 | 0.1366<br>69171 | Down |
| OSBPL<br>3  | 444.15<br>37063 | 262.2489678 | 626.0584447 | 2.3872<br>67526 | 1.255360<br>249     | 0.0047<br>04539 | 0.0714<br>14461 | Up   |
| OSR2        | 159.75<br>64423 | 300.7128238 | 18.80006079 | 0.0625<br>18321 | -<br>3.999577<br>16 | 7.66E-<br>07    | 0.0001<br>25614 | Down |
| OSTN        | 81.727<br>75438 | 162.7519276 | 0.703581125 | 0.0043<br>23028 | -<br>7.853742       | 3.79E-<br>08    | 1.09E-<br>05    | Down |

|               |                 |             |             |                 |                     |                 |                 |      |
|---------------|-----------------|-------------|-------------|-----------------|---------------------|-----------------|-----------------|------|
|               |                 |             |             |                 | 14                  |                 |                 |      |
| OVOL2         | 231.73<br>62805 | 63.24688849 | 400.2256726 | 6.3279<br>89916 | 2.661747<br>301     | 7.35E-<br>05    | 0.0040<br>11515 | Up   |
| OXTR          | 175.29<br>38811 | 92.22541551 | 258.3623467 | 2.8014<br>2242  | 1.486159<br>541     | 0.0110<br>32165 | 0.1259<br>55204 | Up   |
| P2RX3         | 130.06<br>60322 | 46.56467134 | 213.5673931 | 4.5864<br>68388 | 2.197383<br>696     | 0.0136<br>04164 | 0.1446<br>96651 | Up   |
| P2RX6         | 16.301<br>70088 | 29.68911978 | 2.914281975 | 0.0981<br>59932 | -<br>3.348721<br>94 | 0.0150<br>07544 | 0.1546<br>09417 | Down |
| P2RY1         | 30.843<br>66609 | 47.73044799 | 13.9568842  | 0.2924<br>10501 | -<br>1.773932<br>97 | 0.0352<br>92094 | 0.2526<br>10252 | Down |
| P2RY10        | 44.694<br>41242 | 20.81923068 | 68.56959417 | 3.2935<br>70029 | 1.719652<br>225     | 0.0187<br>73292 | 0.1766<br>5697  | Up   |
| P2RY2         | 123.40<br>62921 | 38.48464557 | 208.3279387 | 5.4132<br>74193 | 2.436501<br>465     | 2.93E-<br>05    | 0.0020<br>27645 | Up   |
| P2RY6         | 91.044<br>39452 | 39.61760536 | 142.4711837 | 3.5961<br>58384 | 1.846456<br>562     | 0.0031<br>64955 | 0.0543<br>73923 | Up   |
| P3H1          | 1804.4<br>51921 | 2718.582295 | 890.3215459 | 0.3274<br>94793 | -<br>1.610456<br>13 | 0.0010<br>9558  | 0.0270<br>35797 | Down |
| P3H4          | 795.08<br>79529 | 1440.317495 | 149.8584111 | 0.1040<br>45401 | -<br>3.264714<br>9  | 8.88E-<br>06    | 0.0007<br>74154 | Down |
| P4HA1         | 1617.7<br>38087 | 2427.851187 | 807.6249876 | 0.3326<br>5012  | -<br>1.587922<br>54 | 0.0003<br>11834 | 0.0115<br>24399 | Down |
| P4HA2         | 2939.1<br>31464 | 4593.190961 | 1285.071967 | 0.2797<br>77605 | -<br>1.837647<br>61 | 7.30E-<br>05    | 0.0040<br>02829 | Down |
| P4HA3         | 427.34<br>62217 | 807.0774691 | 47.61497435 | 0.0589<br>96783 | -<br>4.083219<br>9  | 0.0046<br>07591 | 0.0701<br>77922 | Down |
| PABPC<br>1L2A | 71.166<br>40426 | 32.30000063 | 110.0328079 | 3.4065<br>88413 | 1.768327<br>65      | 0.0025<br>94351 | 0.0473<br>21709 | Up   |
| PABPC<br>4L   | 126.30<br>14138 | 179.5451661 | 73.05766152 | 0.4069<br>04085 | -<br>1.297239<br>33 | 0.0402<br>28258 | 0.2703<br>87671 | Down |
| PABPC<br>5    | 19.192<br>19144 | 36.17700454 | 2.207378329 | 0.0610<br>16061 | -<br>4.034667<br>13 | 0.0007<br>82178 | 0.0212<br>0436  | Down |
| PACSIN<br>1   | 42.000<br>06258 | 18.21965459 | 65.78047056 | 3.6104<br>12604 | 1.852163<br>72      | 0.0095<br>31854 | 0.1145<br>78149 | Up   |

|            |                 |             |             |                 |                     |                 |                 |      |
|------------|-----------------|-------------|-------------|-----------------|---------------------|-----------------|-----------------|------|
| PADI2      | 361.90<br>90618 | 139.7664879 | 584.0516356 | 4.1787<br>67345 | 2.063077<br>438     | 0.0006<br>12722 | 0.0177<br>83061 | Up   |
| PAK3       | 14.666<br>85744 | 25.43498001 | 3.898734869 | 0.1532<br>82403 | -<br>2.705736<br>01 | 0.0295<br>36168 | 0.2293<br>59855 | Down |
| PAK4       | 1409.0<br>8234  | 765.444152  | 2052.720529 | 2.6817<br>37816 | 1.423168<br>197     | 0.0017<br>55674 | 0.0367<br>06729 | Up   |
| PAK6       | 255.39<br>45989 | 121.3773185 | 389.4118792 | 3.2082<br>75516 | 1.681798<br>041     | 0.0016<br>62747 | 0.0356<br>92935 | Up   |
| PALD1      | 265.91<br>76387 | 421.009529  | 110.8257483 | 0.2632<br>381   | -<br>1.925559<br>78 | 0.0001<br>41284 | 0.0064<br>85021 | Down |
| PALLD      | 5189.5<br>75653 | 8127.283058 | 2251.868249 | 0.2770<br>75159 | -<br>1.851650<br>72 | 0.0122<br>84474 | 0.1355<br>34935 | Down |
| PALM2      | 100.01<br>54399 | 168.2698088 | 31.76107094 | 0.1887<br>50859 | -<br>2.405444<br>89 | 0.0129<br>6625  | 0.1408<br>36916 | Down |
| PALM3      | 222.90<br>24994 | 88.24108743 | 357.5639113 | 4.0521<br>24942 | 2.018678<br>658     | 0.0105<br>22353 | 0.1223<br>80868 | Up   |
| PAMR1      | 132.37<br>24016 | 232.4234795 | 32.32132374 | 0.1390<br>62214 | -<br>2.846197<br>63 | 0.0447<br>64615 | 0.2874<br>72012 | Down |
| PANX2      | 38.823<br>12801 | 7.558602937 | 70.08765308 | 9.2725<br>67122 | 3.212968<br>806     | 6.58E-<br>05    | 0.0037<br>66169 | Up   |
| PAPLN      | 3198.0<br>11039 | 1257.154605 | 5138.867474 | 4.0876<br>97292 | 2.031288<br>364     | 0.0057<br>70523 | 0.0816<br>21532 | Up   |
| PAPPA      | 144.10<br>67248 | 276.8923637 | 11.32108594 | 0.0408<br>86234 | -<br>4.612241<br>01 | 2.17E-<br>06    | 0.0002<br>61423 | Down |
| PAPPA2     | 400.20<br>02832 | 686.2457473 | 114.1548191 | 0.1663<br>46851 | -<br>2.587733<br>54 | 3.61E-<br>06    | 0.0003<br>94987 | Down |
| PAQR7      | 410.92<br>04989 | 726.3186153 | 95.52238254 | 0.1315<br>15812 | -<br>2.926691<br>83 | 0.0118<br>00175 | 0.1323<br>76681 | Down |
| PARD6<br>B | 61.528<br>23428 | 26.81019155 | 96.246277   | 3.5899<br>13813 | 1.843949<br>208     | 0.0058<br>22743 | 0.0821<br>88159 | Up   |
| PARP3      | 654.74<br>64862 | 930.8586426 | 378.6343297 | 0.4067<br>5814  | -<br>1.297756<br>88 | 0.0232<br>74745 | 0.1991<br>30023 | Down |
| PARVA      | 1357.7<br>98083 | 1972.420942 | 743.1752252 | 0.3767<br>83277 | -<br>1.408193<br>16 | 0.0050<br>44643 | 0.0749<br>59079 | Down |

|             |                 |             |             |                 |                     |                 |                 |          |
|-------------|-----------------|-------------|-------------|-----------------|---------------------|-----------------|-----------------|----------|
| PARVB       | 327.52<br>34498 | 511.3652203 | 143.6816792 | 0.2809<br>76636 | -<br>1.831477<br>93 | 0.0001<br>26438 | 0.0060<br>1798  | Dow<br>n |
| PATZ1       | 1095.6<br>69917 | 532.8307534 | 1658.509081 | 3.1126<br>37681 | 1.638137<br>653     | 0.0004<br>03568 | 0.0136<br>85629 | Up       |
| PAX1        | 21.629<br>50956 | 4.807731115 | 38.45128801 | 7.9978<br>03348 | 2.999603<br>808     | 0.0019<br>64199 | 0.0395<br>0077  | Up       |
| PBK         | 101.80<br>85096 | 159.6617881 | 43.95523114 | 0.2753<br>02135 | -<br>1.860912<br>3  | 0.0037<br>29691 | 0.0603<br>40715 | Dow<br>n |
| PBX4        | 53.286<br>88323 | 29.40786575 | 77.16590071 | 2.6239<br>88472 | 1.391761<br>382     | 0.0216<br>48042 | 0.1913<br>32207 | Up       |
| PCDH1<br>0  | 7.5998<br>21105 | 13.59921005 | 1.600432159 | 0.1176<br>85671 | -<br>3.086989<br>42 | 0.0456<br>57412 | 0.2903<br>11615 | Dow<br>n |
| PCDH1<br>7  | 165.51<br>02028 | 296.3836474 | 34.63675817 | 0.1168<br>64606 | -<br>3.097090<br>04 | 2.85E-<br>08    | 8.71E-<br>06    | Dow<br>n |
| PCDH1<br>8  | 869.49<br>61181 | 1384.807078 | 354.185158  | 0.2557<br>64982 | -<br>1.967109<br>34 | 0.0214<br>97781 | 0.1904<br>70764 | Dow<br>n |
| PCDH7       | 1047.0<br>44305 | 1552.961809 | 541.126801  | 0.3484<br>48235 | -<br>1.520983<br>75 | 0.0025<br>98738 | 0.0473<br>21709 | Dow<br>n |
| PCDHB<br>16 | 48.483<br>81609 | 76.05776249 | 20.90986969 | 0.2749<br>20915 | -<br>1.862911<br>43 | 0.0127<br>38727 | 0.1390<br>16268 | Dow<br>n |
| PCDHG<br>A2 | 338.01<br>45411 | 141.0406487 | 534.9884335 | 3.7931<br>50686 | 1.923396<br>685     | 0.0406<br>39546 | 0.2720<br>87459 | Up       |
| PCDHG<br>C3 | 1056.6<br>68955 | 1623.04258  | 490.2953291 | 0.3020<br>84083 | -<br>1.726977<br>93 | 0.0010<br>71253 | 0.0265<br>51613 | Dow<br>n |
| PCGF5       | 268.38<br>69133 | 367.9317191 | 168.8421076 | 0.4588<br>95221 | -<br>1.123763<br>31 | 0.0120<br>95601 | 0.1340<br>249   | Dow<br>n |
| PCK1        | 59.533<br>36434 | 106.9797273 | 12.08700142 | 0.1129<br>84037 | -<br>3.145809<br>15 | 0.0439<br>74189 | 0.2839<br>12098 | Dow<br>n |
| PCLO        | 31.325<br>63039 | 5.117549487 | 57.5337113  | 11.242<br>43379 | 3.490882<br>483     | 0.0011<br>48977 | 0.0278<br>20657 | Up       |
| PCOLC<br>E  | 10489.<br>68124 | 19210.39943 | 1768.963046 | 0.0920<br>83616 | -<br>3.440911<br>7  | 0.0188<br>49469 | 0.1771<br>88934 | Dow<br>n |
| PCOLC       | 1148.7          | 2142.368619 | 155.0717074 | 0.0723          | -                   | 4.59E-          | 1.03E-          | Dow      |

|            |                 |             |             |                 |                     |                 |                 |      |
|------------|-----------------|-------------|-------------|-----------------|---------------------|-----------------|-----------------|------|
| E2         | 20163           |             |             | 83299           | 3.788199<br>34      | 14              | 10              | n    |
| PCP4       | 31.520<br>43311 | 0.952681978 | 62.08818423 | 65.171<br>99409 | 6.026180<br>233     | 0.0329<br>9216  | 0.2431<br>1502  | Up   |
| PCP4L1     | 186.18<br>13605 | 345.6685554 | 26.69416548 | 0.0772<br>24743 | -<br>3.694793<br>02 | 0.0126<br>88664 | 0.1386<br>37677 | Down |
| PCSK6      | 709.06<br>94229 | 1143.565261 | 274.5735845 | 0.2401<br>03118 | -<br>2.058273<br>96 | 0.0008<br>6702  | 0.0227<br>99092 | Down |
| PDCD4      | 8015.7<br>88531 | 5095.432864 | 10936.1442  | 2.1462<br>64016 | 1.101827<br>555     | 0.0458<br>81903 | 0.2909<br>12993 | Up   |
| PDCL2      | 3.5645<br>61841 | 0           | 7.129123681 | Inf             | Inf                 | 0.0379<br>89617 | 0.2626<br>37007 | Up   |
| PDDC1      | 1477.7<br>96672 | 982.8115687 | 1972.781776 | 2.0072<br>83836 | 1.005244<br>633     | 0.0205<br>71899 | 0.1865<br>74402 | Up   |
| PDE10<br>A | 247.28<br>91715 | 419.4556971 | 75.122646   | 0.1790<br>95543 | -<br>2.481198<br>66 | 9.99E-<br>05    | 0.0049<br>78884 | Down |
| PDE1A      | 301.51<br>3942  | 530.2930486 | 72.73483534 | 0.1371<br>597   | -<br>2.866071<br>44 | 4.35E-<br>08    | 1.21E-<br>05    | Down |
| PDE1B      | 175.67<br>93642 | 279.7658618 | 71.59286672 | 0.2559<br>02798 | -<br>1.966332<br>18 | 0.0006<br>38715 | 0.0183<br>31103 | Down |
| PDE1C      | 215.69<br>03747 | 298.1845935 | 133.1961559 | 0.4466<br>90268 | -<br>1.162653<br>27 | 0.0384<br>27398 | 0.2643<br>13518 | Down |
| PDE4B      | 763.58<br>89732 | 1146.013657 | 381.1642892 | 0.3326<br>00128 | -<br>1.588139<br>37 | 0.0288<br>20947 | 0.2261<br>42262 | Down |
| PDE5A      | 130.06<br>7235  | 237.1038895 | 23.03058063 | 0.0971<br>32867 | -<br>3.363896<br>64 | 0.0048<br>55078 | 0.0728<br>62521 | Down |
| PDE7A      | 625.09<br>32569 | 408.5764332 | 841.6100807 | 2.0598<br>59582 | 1.042545<br>994     | 0.0295<br>98449 | 0.2295<br>24443 | Up   |
| PDE7B      | 553.08<br>93156 | 784.4692426 | 321.7093887 | 0.4100<br>98155 | -<br>1.285958<br>84 | 0.0054<br>40709 | 0.0785<br>17114 | Down |
| PDE8A      | 468.26<br>88468 | 696.5524458 | 239.9852477 | 0.3445<br>32919 | -<br>1.537286<br>26 | 0.0042<br>69128 | 0.0663<br>97921 | Down |
| PDGFD      | 452.01<br>12644 | 811.5345361 | 92.48799274 | 0.1139<br>66798 | -<br>3.133314       | 2.09E-<br>05    | 0.0015<br>49827 | Down |



|            |                 |             |             |                 |                     |                 |                 |          |
|------------|-----------------|-------------|-------------|-----------------|---------------------|-----------------|-----------------|----------|
|            |                 |             |             |                 | 51                  |                 |                 |          |
| PDGFR<br>A | 4604.2<br>86762 | 8012.221401 | 1196.352123 | 0.1493<br>15909 | -<br>2.743560<br>21 | 0.0168<br>59299 | 0.1649<br>26736 | Dow<br>n |
| PDGFR<br>B | 5203.5<br>90537 | 7200.10944  | 3207.071633 | 0.4454<br>19845 | -<br>1.166762<br>26 | 0.0102<br>48576 | 0.1204<br>39133 | Dow<br>n |
| PDGFR<br>L | 1223.8<br>46079 | 2195.180253 | 252.5119044 | 0.1150<br>30146 | -<br>3.119916<br>1  | 0.0104<br>29523 | 0.1216<br>96857 | Dow<br>n |
| PDK3       | 555.94<br>29531 | 773.2355928 | 338.6503134 | 0.4379<br>65242 | -<br>1.191111<br>72 | 0.0388<br>11655 | 0.2654<br>99977 | Dow<br>n |
| PDLIM<br>7 | 6019.8<br>80121 | 9745.96947  | 2293.790772 | 0.2353<br>57886 | -<br>2.087071<br>9  | 0.0023<br>81695 | 0.0450<br>91696 | Dow<br>n |
| PDPN       | 159.65<br>97645 | 257.9885682 | 61.3309608  | 0.2377<br>27436 | -<br>2.072619<br>68 | 0.0001<br>67373 | 0.0073<br>4609  | Dow<br>n |
| PDS5B      | 835.08<br>67399 | 1144.887596 | 525.2858838 | 0.4588<br>10005 | -<br>1.124031<br>24 | 0.0325<br>74812 | 0.2424<br>05147 | Dow<br>n |
| PDZD7      | 71.121<br>78355 | 116.1930364 | 26.05053066 | 0.2242<br>00447 | -<br>2.157138<br>94 | 0.0217<br>66781 | 0.1914<br>37624 | Dow<br>n |
| PDZK1      | 250.55<br>54158 | 43.2930065  | 457.8178251 | 10.574<br>86791 | 3.402567<br>738     | 0.0115<br>41942 | 0.1300<br>46908 | Up       |
| PEA15      | 5798.3<br>71985 | 8451.205319 | 3145.538651 | 0.3722<br>00004 | -<br>1.425850<br>03 | 0.0022<br>82167 | 0.0438<br>49669 | Dow<br>n |
| PEAK1      | 2097.2<br>47318 | 3299.958388 | 894.5362466 | 0.2710<br>75008 | -<br>1.883235<br>99 | 0.0001<br>87119 | 0.0079<br>23559 | Dow<br>n |
| PECAM<br>1 | 7136.7<br>56468 | 10103.84314 | 4169.6698   | 0.4126<br>81565 | -<br>1.276899<br>1  | 0.0017<br>6616  | 0.0367<br>89544 | Dow<br>n |
| PEG10      | 200.81<br>20037 | 299.4548825 | 102.169125  | 0.3411<br>83701 | -<br>1.551379<br>37 | 0.0078<br>11976 | 0.1003<br>70538 | Dow<br>n |
| PERP       | 1157.0<br>0847  | 345.7054908 | 1968.311448 | 5.6936<br>07712 | 2.509343<br>095     | 1.26E-<br>06    | 0.0001<br>71075 | Up       |
| PFKFB<br>2 | 452.13<br>10437 | 284.4475079 | 619.8145795 | 2.1790<br>12163 | 1.123674<br>25      | 0.0404<br>24471 | 0.2710<br>84396 | Up       |
| PFKP       | 1821.3          | 2682.400976 | 960.2833805 | 0.3579          | -                   | 0.0019          | 0.0399          | Dow      |

|          |             |             |             |             |             |             |             |      |
|----------|-------------|-------------|-------------|-------------|-------------|-------------|-------------|------|
|          | 42178       |             |             | 93972       | 1.4819928   | 96374       | 69577       | n    |
| PFN2     | 1095.838692 | 1600.214782 | 591.4626017 | 0.369614509 | -1.4359067  | 0.024799391 | 0.20634512  | Down |
| PGAM1    | 3799.897438 | 5287.064604 | 2312.730273 | 0.437431816 | -1.19286994 | 0.007081485 | 0.093516036 | Down |
| PGK1     | 4241.068254 | 6288.378909 | 2193.757598 | 0.348859003 | -1.51928403 | 0.001606279 | 0.034868435 | Down |
| PGLYR P1 | 150.917414  | 85.35187738 | 216.4829506 | 2.536358393 | 1.342758616 | 0.029479628 | 0.229019384 | Up   |
| PGM2     | 700.8733864 | 940.6835419 | 461.063231  | 0.490136385 | -1.02874485 | 0.029454114 | 0.229018434 | Down |
| PGM3     | 568.5953443 | 790.5148015 | 346.6758872 | 0.438544461 | -1.18920498 | 0.006842385 | 0.09170118  | Down |
| PHACT R2 | 181.0677097 | 260.4191217 | 101.7162977 | 0.390586901 | -1.35628453 | 0.005226269 | 0.076461202 | Down |
| PHLDB 2  | 2968.712009 | 4271.642686 | 1665.781332 | 0.389962704 | -1.35859194 | 0.01296802  | 0.140836916 | Down |
| PHTF2    | 363.1719333 | 558.5936002 | 167.7502663 | 0.30030825  | -1.73548399 | 0.014427009 | 0.150694161 | Down |
| PHYHIP   | 139.8064349 | 57.9113866  | 221.7014831 | 3.828288289 | 1.936699476 | 0.000704881 | 0.019713707 | Up   |
| PI16     | 19852.12262 | 36040.67976 | 3663.565475 | 0.101650843 | -3.29830592 | 4.86E-06    | 0.000494984 | Down |
| PIANP    | 14.54842786 | 1.306821576 | 27.79003415 | 21.26536221 | 4.410433523 | 0.000437582 | 0.014378031 | Up   |
| PID1     | 556.1155106 | 803.0589323 | 309.172089  | 0.384993027 | -1.37709578 | 0.019379881 | 0.180284617 | Down |
| PIEZO2   | 557.541996  | 1013.937915 | 101.1460774 | 0.099755691 | -3.32545704 | 0.010434126 | 0.121696857 | Down |
| PIGL     | 408.0922161 | 268.4130987 | 547.7713335 | 2.040777206 | 1.02911869  | 0.027616887 | 0.219463003 | Up   |
| PIK3AP   | 1256.4      | 541.2480274 | 1971.62915  | 3.6427      | 1.865026    | 4.48E-      | 0.0027      | Up   |

|              |                 |             |             |                 |                     |                 |                 |      |
|--------------|-----------------|-------------|-------------|-----------------|---------------------|-----------------|-----------------|------|
| 1            | 38588           |             |             | 46116           | 449                 | 05              | 8523            |      |
| PIK3C2<br>G  | 94.805<br>45526 | 29.53314131 | 160.0777692 | 5.4202<br>75734 | 2.438366<br>245     | 0.0005<br>96084 | 0.0174<br>84173 | Up   |
| PIK3IP1      | 751.48<br>46522 | 474.9715369 | 1027.997768 | 2.1643<br>35518 | 1.113924<br>165     | 0.0080<br>14149 | 0.1020<br>95508 | Up   |
| PIP5K1<br>B  | 615.10<br>07244 | 270.6959546 | 959.5054943 | 3.5445<br>87491 | 1.825617<br>74      | 0.0032<br>41334 | 0.0550<br>69611 | Up   |
| PITPNA       | 1557.3<br>66754 | 2125.975964 | 988.7575427 | 0.4650<br>84065 | -<br>1.104436<br>59 | 0.0222<br>83913 | 0.1945<br>57822 | Down |
| PITPNC<br>1  | 966.84<br>27654 | 1442.547283 | 491.1382483 | 0.3404<br>65962 | -<br>1.554417<br>52 | 0.0021<br>59593 | 0.0420<br>24707 | Down |
| PITX2        | 6.3437<br>22358 | 12.68744472 | 0           | 0               | #NAME<br>?          | 0.0155<br>14847 | 0.1573<br>22315 | Down |
| PKD1         | 5762.3<br>15884 | 9065.012838 | 2459.61893  | 0.2713<br>30992 | -<br>1.881874<br>25 | 0.0001<br>08997 | 0.0053<br>86841 | Down |
| PKD2         | 1840.1<br>50238 | 2669.96465  | 1010.335825 | 0.3784<br>07941 | -<br>1.401985<br>73 | 0.0195<br>13974 | 0.1809<br>83327 | Down |
| PKHD1<br>L1  | 282.78<br>61387 | 530.5546529 | 35.01762457 | 0.0660<br>01918 | -<br>3.921348<br>25 | 0.0135<br>98994 | 0.1446<br>96651 | Down |
| PKIG         | 621.15<br>71342 | 886.0773644 | 356.2369039 | 0.4020<br>38149 | -<br>1.314595<br>69 | 0.0012<br>72154 | 0.0296<br>87441 | Down |
| PKM          | 10290.<br>30202 | 14298.02165 | 6282.582386 | 0.4394<br>02215 | -<br>1.186385<br>95 | 0.0103<br>34926 | 0.1209<br>81006 | Down |
| PKNOX<br>2   | 454.34<br>73249 | 867.9526757 | 40.74197406 | 0.0469<br>40317 | -<br>4.413028<br>59 | 0.0158<br>20571 | 0.1587<br>24846 | Down |
| PKP1         | 525.54<br>20649 | 237.8118097 | 813.27232   | 3.4198<br>14688 | 1.773918<br>151     | 0.0107<br>8561  | 0.1243<br>20524 | Up   |
| PKP2         | 312.91<br>67535 | 103.5335772 | 522.2999298 | 5.0447<br>3953  | 2.334779<br>782     | 0.0004<br>91606 | 0.0153<br>69294 | Up   |
| PKP3         | 459.06<br>41892 | 163.3950111 | 754.7333672 | 4.6190<br>72283 | 2.207603<br>123     | 1.12E-<br>05    | 0.0009<br>24029 | Up   |
| PLA2G<br>2D1 | 44.491<br>04553 | 24.26838002 | 64.71371104 | 2.6665<br>85532 | 1.414993<br>604     | 0.0309<br>63433 | 0.2360<br>01279 | Up   |
| PLA2R<br>1   | 334.91<br>34107 | 471.7699704 | 198.0568511 | 0.4198<br>16571 | -<br>1.252168<br>98 | 0.0064<br>49098 | 0.0880<br>81407 | Down |

|             |                 |             |             |                 |                     |                 |                 |          |
|-------------|-----------------|-------------|-------------|-----------------|---------------------|-----------------|-----------------|----------|
| PLAC9       | 845.50<br>35986 | 1578.311151 | 112.6960465 | 0.0714<br>02934 | -<br>3.807872<br>84 | 5.73E-<br>07    | 9.66E-<br>05    | Dow<br>n |
| PLAU        | 1272.8<br>20621 | 1976.685723 | 568.9555186 | 0.2878<br>33069 | -<br>1.796695<br>74 | 0.0001<br>565   | 0.0070<br>25544 | Dow<br>n |
| PLAUR       | 436.81<br>71256 | 642.4656421 | 231.1686091 | 0.3598<br>14742 | -<br>1.474673<br>8  | 0.0107<br>10905 | 0.1237<br>758   | Dow<br>n |
| PLB1        | 132.44<br>92822 | 62.42998203 | 202.4685824 | 3.2431<br>30558 | 1.697387<br>103     | 0.0468<br>12162 | 0.2946<br>42218 | Up       |
| PLCB4       | 1001.3<br>17117 | 1585.348642 | 417.2855916 | 0.2632<br>13769 | -<br>1.925693<br>13 | 0.0155<br>37586 | 0.1573<br>73679 | Dow<br>n |
| PLCD1       | 1018.1<br>6526  | 1483.800942 | 552.5295784 | 0.3723<br>74463 | -<br>1.425173<br>96 | 0.0056<br>43418 | 0.0800<br>95682 | Dow<br>n |
| PLCD4       | 178.36<br>32836 | 255.3638879 | 101.3626792 | 0.3969<br>34273 | -<br>1.333027<br>96 | 0.0388<br>1004  | 0.2654<br>99977 | Dow<br>n |
| PLCE1       | 354.84<br>83604 | 511.9538181 | 197.7429027 | 0.3862<br>51446 | -<br>1.372387<br>76 | 0.0157<br>8883  | 0.1585<br>828   | Dow<br>n |
| PLCG2       | 757.52<br>28228 | 384.5550372 | 1130.490608 | 2.9397<br>36836 | 1.555687<br>012     | 0.0004<br>79176 | 0.0150<br>615   | Up       |
| PLCH2       | 442.60<br>91276 | 186.158602  | 699.0596531 | 3.7551<br>83191 | 1.908883<br>289     | 0.0005<br>93084 | 0.0174<br>52929 | Up       |
| PLCL1       | 220.96<br>76386 | 303.5528873 | 138.38239   | 0.4558<br>75716 | -<br>1.133287<br>53 | 0.0096<br>66511 | 0.1155<br>56123 | Dow<br>n |
| PLCXD<br>1  | 97.433<br>86715 | 27.85042496 | 167.0173093 | 5.9969<br>39348 | 2.584226<br>382     | 0.0347<br>31276 | 0.2504<br>06673 | Up       |
| PLCXD<br>3  | 7.0589<br>58936 | 13.50526113 | 0.612656744 | 0.0453<br>64302 | -<br>4.462298<br>73 | 0.0129<br>95743 | 0.1409<br>68252 | Dow<br>n |
| PLD1        | 1041.7<br>17145 | 1690.549856 | 392.8844336 | 0.2324<br>00383 | -<br>2.105315<br>65 | 0.0174<br>38041 | 0.1688<br>48534 | Dow<br>n |
| PLD4        | 333.79<br>09381 | 217.8322555 | 449.7496208 | 2.0646<br>6035  | 1.045904<br>468     | 0.0341<br>17296 | 0.2479<br>75419 | Up       |
| PLEK2       | 66.145<br>64987 | 30.49625517 | 101.7950446 | 3.3379<br>52283 | 1.738963<br>331     | 0.0050<br>17539 | 0.0746<br>17795 | Up       |
| PLEKH<br>A3 | 422.90<br>76867 | 574.9573624 | 270.858011  | 0.4710<br>92343 | -<br>1.085918       | 0.0328<br>94402 | 0.2427<br>02942 | Dow<br>n |

|             |                 |             |             |                 |                     |                 |                 |      |
|-------------|-----------------|-------------|-------------|-----------------|---------------------|-----------------|-----------------|------|
|             |                 |             |             |                 | 21                  |                 |                 |      |
| PLEKH<br>G6 | 102.93<br>47035 | 34.27228287 | 171.5971241 | 5.0068<br>77562 | 2.323911<br>176     | 0.0028<br>92475 | 0.0511<br>23429 | Up   |
| PLEKH<br>N1 | 298.71<br>94117 | 117.51609   | 479.9227333 | 4.0838<br>89561 | 2.029943<br>853     | 0.0258<br>32732 | 0.2110<br>09242 | Up   |
| PLEKH<br>O2 | 1006.4<br>96964 | 1390.541643 | 622.4522839 | 0.4476<br>32969 | -<br>1.159611<br>8  | 0.0438<br>91987 | 0.2835<br>84364 | Down |
| PLEKH<br>S1 | 189.84<br>94372 | 77.55930354 | 302.1395708 | 3.8955<br>94171 | 1.961843<br>39      | 0.0006<br>10417 | 0.0177<br>83061 | Up   |
| PLIN4       | 1933.7<br>78025 | 3650.560475 | 216.9955755 | 0.0594<br>41715 | -<br>4.072380<br>45 | 0.0004<br>04371 | 0.0136<br>85629 | Down |
| PLK5        | 113.79<br>42281 | 45.17024879 | 182.4182074 | 4.0384<br>59214 | 2.013804<br>969     | 0.0005<br>3824  | 0.0162<br>63518 | Up   |
| PLLP        | 299.41<br>89803 | 55.83622625 | 543.0017344 | 9.7249<br>00317 | 3.281683<br>462     | 1.23E-<br>09    | 6.93E-<br>07    | Up   |
| PLN         | 959.15<br>92864 | 1789.782922 | 128.535651  | 0.0718<br>16336 | -<br>3.799544<br>15 | 0.0266<br>45253 | 0.2152<br>50209 | Down |
| PLOD1       | 2956.4<br>87098 | 4600.232345 | 1312.741851 | 0.2853<br>64249 | -<br>1.809123<br>49 | 0.0002<br>52494 | 0.0099<br>14059 | Down |
| PLOD2       | 2117.3<br>16043 | 3857.746946 | 376.8851405 | 0.0976<br>95662 | -<br>3.355561<br>69 | 2.58E-<br>05    | 0.0018<br>18981 | Down |
| PLS3        | 3095.8<br>98862 | 4267.882194 | 1923.91553  | 0.4507<br>89277 | -<br>1.149474<br>9  | 0.0176<br>5683  | 0.1703<br>27035 | Down |
| PLSCR<br>4  | 1227.1<br>46788 | 2112.40227  | 341.891307  | 0.1618<br>49526 | -<br>2.627274<br>95 | 0.0222<br>38678 | 0.1942<br>68049 | Down |
| PLXDC<br>2  | 1874.8<br>8809  | 3030.561969 | 719.2142121 | 0.2373<br>20411 | -<br>2.075091<br>91 | 3.18E-<br>05    | 0.0021<br>57031 | Down |
| PLXNA<br>4  | 605.51<br>09179 | 1088.527917 | 122.4939192 | 0.1125<br>3172  | -<br>3.151596<br>37 | 0.0081<br>52277 | 0.1026<br>96151 | Down |
| PLXNB<br>1  | 1293.8<br>63168 | 752.3553633 | 1835.370972 | 2.4395<br>00084 | 1.286585<br>533     | 0.0242<br>48842 | 0.2043<br>08668 | Up   |
| PMEPA<br>1  | 3216.4<br>49329 | 4930.669171 | 1502.229487 | 0.3046<br>70509 | -<br>1.714678<br>23 | 0.0031<br>26595 | 0.0537<br>66113 | Down |
| PMP22       | 2866.7          | 4512.668545 | 1220.861365 | 0.2705          | -                   | 0.0010          | 0.0260          | Down |

|             |                 |             |             |                 |                     |                 |                 |          |
|-------------|-----------------|-------------|-------------|-----------------|---------------------|-----------------|-----------------|----------|
|             | 64955           |             |             | 4089            | 1.886081<br>43      | 36067           | 3009            | n        |
| PNCK        | 181.75<br>4068  | 339.6216128 | 23.88652317 | 0.0703<br>32753 | -<br>3.829659<br>49 | 0.0215<br>68014 | 0.1907<br>1834  | Dow<br>n |
| PNMT        | 72.084<br>36356 | 5.282270013 | 138.8864571 | 26.292<br>9492  | 4.716604<br>069     | 0.0062<br>14932 | 0.0860<br>40794 | Up       |
| PODN        | 2678.7<br>1093  | 4323.115781 | 1034.306078 | 0.2392<br>50145 | -<br>2.063408<br>29 | 0.0052<br>46985 | 0.0765<br>80676 | Dow<br>n |
| PODXL<br>2  | 70.152<br>04472 | 104.1492352 | 36.15485423 | 0.3471<br>44693 | -<br>1.526390<br>98 | 0.0263<br>69518 | 0.2135<br>96648 | Dow<br>n |
| POF1B       | 17.107<br>81016 | 1.951817678 | 32.26380264 | 16.530<br>13137 | 4.047026<br>285     | 0.0004<br>48337 | 0.0145<br>19843 | Up       |
| POLH        | 365.05<br>38528 | 500.032199  | 230.0755067 | 0.4601<br>21382 | -<br>1.119913<br>59 | 0.0265<br>3208  | 0.2145<br>28099 | Dow<br>n |
| POPDC<br>2  | 20.990<br>02929 | 35.48408303 | 6.49597554  | 0.1830<br>67307 | -<br>2.449553<br>92 | 0.0054<br>02395 | 0.0781<br>50607 | Dow<br>n |
| PORCN       | 1291.6<br>76625 | 396.622308  | 2186.730943 | 5.5133<br>83636 | 2.462937<br>992     | 0.0255<br>79881 | 0.2098<br>38776 | Up       |
| POU2A<br>F1 | 135.98<br>57154 | 56.10579486 | 215.8656359 | 3.8474<br>74872 | 1.943911<br>904     | 0.0446<br>84537 | 0.2870<br>59961 | Up       |
| PPAP2A      | 1933.5<br>28853 | 2716.581039 | 1150.476667 | 0.4235<br>01692 | -<br>1.239560<br>36 | 0.0089<br>26492 | 0.1097<br>64816 | Dow<br>n |
| PPEF1       | 21.513<br>16904 | 35.31979271 | 7.706545358 | 0.2181<br>93391 | -<br>2.196320<br>69 | 0.0315<br>66608 | 0.2381<br>50572 | Dow<br>n |
| PPFIA4      | 626.47<br>32842 | 962.1645571 | 290.7820114 | 0.3022<br>16507 | -<br>1.726345<br>63 | 0.0425<br>58596 | 0.2783<br>93577 | Dow<br>n |
| PPIC        | 1469.5<br>89832 | 2371.424532 | 567.7551316 | 0.2394<br>15222 | -<br>2.062413<br>21 | 0.0004<br>82847 | 0.0151<br>47958 | Dow<br>n |
| PPIL6       | 27.312<br>82457 | 10.85943092 | 43.76621822 | 4.0302<br>49702 | 2.010869<br>226     | 0.0161<br>97251 | 0.1612<br>48465 | Up       |
| PPIP5K<br>1 | 551.85<br>46412 | 310.8788984 | 792.8303841 | 2.5502<br>86907 | 1.350659<br>559     | 0.0027<br>05575 | 0.0487<br>57111 | Up       |
| PPM1E       | 32.869<br>98739 | 57.09469828 | 8.645276503 | 0.1514<br>19953 | -<br>2.723372<br>77 | 0.0254<br>40752 | 0.2089<br>64746 | Dow<br>n |

|              |                 |             |             |                 |                     |                 |                 |      |
|--------------|-----------------|-------------|-------------|-----------------|---------------------|-----------------|-----------------|------|
| PPM1J        | 72.558<br>43487 | 29.21735566 | 115.8995141 | 3.9668<br>03684 | 1.987977<br>001     | 0.0030<br>08613 | 0.0524<br>8778  | Up   |
| PPOX         | 903.74<br>56933 | 581.6000248 | 1225.891362 | 2.1077<br>9111  | 1.075731<br>898     | 0.0221<br>01205 | 0.1935<br>35747 | Up   |
| PPP1R1<br>2A | 1154.4<br>11997 | 1913.420993 | 395.4030017 | 0.2066<br>47154 | -<br>2.274758<br>6  | 0.0155<br>21168 | 0.1573<br>22315 | Down |
| PPP1R1<br>4D | 246.28<br>08902 | 61.09565007 | 431.4661304 | 7.0621<br>41574 | 2.820105<br>743     | 3.76E-<br>07    | 6.65E-<br>05    | Up   |
| PPP1R1<br>A  | 48.474<br>52882 | 85.52562618 | 11.42343147 | 0.1335<br>67353 | -<br>2.904360<br>68 | 0.0151<br>10648 | 0.1550<br>51755 | Down |
| PPP1R2       | 557.21<br>87    | 818.2860596 | 296.1513403 | 0.3619<br>16639 | -<br>1.466270<br>66 | 0.0013<br>06071 | 0.0302<br>18075 | Down |
| PPP1R3<br>B  | 489.33<br>65992 | 671.5945353 | 307.0786631 | 0.4572<br>3818  | -<br>1.128982<br>22 | 0.0294<br>41543 | 0.2290<br>18434 | Down |
| PPP1R3<br>C  | 831.55<br>02845 | 1286.623165 | 376.4774044 | 0.2926<br>08912 | -<br>1.772954<br>38 | 0.0117<br>7174  | 0.1322<br>23179 | Down |
| PPP1R3<br>G  | 87.588<br>67807 | 148.4527317 | 26.72462444 | 0.1800<br>21103 | -<br>2.473762<br>06 | 0.0001<br>80587 | 0.0077<br>1946  | Down |
| PPP1R4<br>2  | 23.279<br>28712 | 39.60226621 | 6.956308016 | 0.1756<br>54292 | -<br>2.509189<br>27 | 0.0092<br>49087 | 0.1119<br>76031 | Down |
| PPP2R2<br>C  | 359.96<br>5501  | 698.330426  | 21.60057608 | 0.0309<br>31741 | -<br>5.014768<br>14 | 0.0053<br>04049 | 0.0772<br>23363 | Down |
| PPP4R4       | 37.423<br>3874  | 17.2188166  | 57.6279582  | 3.3468<br>01325 | 1.742782<br>911     | 0.0214<br>92053 | 0.1904<br>70764 | Up   |
| PPTC7        | 96.062<br>48302 | 151.816188  | 40.30877802 | 0.2655<br>10408 | -<br>1.913159<br>68 | 0.0269<br>66696 | 0.2162<br>97126 | Down |
| PQLC3        | 247.02<br>99511 | 342.8724898 | 151.1874123 | 0.4409<br>43548 | -<br>1.181334<br>13 | 0.0187<br>33361 | 0.1764<br>65324 | Down |
| PRAF2        | 785.47<br>94209 | 1124.174142 | 446.7847    | 0.3974<br>3371  | -<br>1.331213<br>85 | 0.0045<br>70633 | 0.0697<br>54354 | Down |
| PRC1         | 370.39<br>99124 | 508.3941029 | 232.4057219 | 0.4571<br>36935 | -<br>1.129301<br>71 | 0.0231<br>85207 | 0.1987<br>82291 | Down |

|              |                 |             |             |                 |                     |                 |                 |          |
|--------------|-----------------|-------------|-------------|-----------------|---------------------|-----------------|-----------------|----------|
| PRDM6        | 63.905<br>90152 | 107.8035605 | 20.00824255 | 0.1855<br>99088 | -<br>2.429738<br>47 | 0.0252<br>3014  | 0.2081<br>31016 | Dow<br>n |
| PRDM8        | 202.95<br>66661 | 354.1982544 | 51.71507776 | 0.1460<br>06021 | -<br>2.775900<br>23 | 0.0006<br>97312 | 0.0195<br>35381 | Dow<br>n |
| PRELP        | 5246.4<br>69697 | 9135.745536 | 1357.193858 | 0.1485<br>58632 | -<br>2.750895<br>66 | 0.0014<br>76423 | 0.0327<br>99499 | Dow<br>n |
| PREX2        | 260.08<br>13103 | 356.8154896 | 163.347131  | 0.4577<br>91592 | -<br>1.127237<br>13 | 0.0132<br>97107 | 0.1426<br>92747 | Dow<br>n |
| PRF1         | 143.55<br>20725 | 74.38484821 | 212.7192968 | 2.8597<br>12723 | 1.515870<br>226     | 0.0053<br>25159 | 0.0774<br>68176 | Up       |
| PRG4         | 4627.7<br>07133 | 9252.074887 | 3.339379384 | 0.0003<br>60933 | -<br>11.43598<br>12 | 1.71E-<br>13    | 2.61E-<br>10    | Dow<br>n |
| PRICK<br>LE2 | 516.87<br>92153 | 886.8290157 | 146.9294149 | 0.1656<br>7953  | -<br>2.593532<br>72 | 0.0027<br>94967 | 0.0501<br>06364 | Dow<br>n |
| PRKAC<br>B   | 893.03<br>73594 | 1199.691993 | 586.3827254 | 0.4887<br>77727 | -<br>1.032749<br>55 | 0.0322<br>70822 | 0.2412<br>57267 | Dow<br>n |
| PRKAR<br>2A  | 454.04<br>92658 | 656.7304943 | 251.3680374 | 0.3827<br>56762 | -<br>1.385500<br>23 | 0.0036<br>39835 | 0.0594<br>19902 | Dow<br>n |
| PRKCD<br>BP  | 3122.3<br>14258 | 5362.774092 | 881.8544244 | 0.1644<br>39973 | -<br>2.604367<br>06 | 4.75E-<br>06    | 0.0004<br>86402 | Dow<br>n |
| PRKCZ        | 539.02<br>22647 | 331.6772653 | 746.3672642 | 2.2502<br>81651 | 1.170105<br>584     | 0.0145<br>79489 | 0.1515<br>8467  | Up       |
| PRKD3        | 1679.8<br>02334 | 2346.658986 | 1012.945681 | 0.4316<br>54402 | -<br>1.212051<br>39 | 0.0167<br>05693 | 0.1642<br>99865 | Dow<br>n |
| PRKG1        | 633.13<br>95732 | 1015.103964 | 251.1751828 | 0.2474<br>3789  | -<br>2.014861<br>66 | 0.0230<br>43354 | 0.1980<br>36712 | Dow<br>n |
| PRKRA        | 259.99<br>84504 | 416.9147274 | 103.0821733 | 0.2472<br>50017 | -<br>2.015957<br>48 | 0.0041<br>02187 | 0.0648<br>54829 | Dow<br>n |
| PROC         | 25.209<br>84958 | 3.387337936 | 47.03236122 | 13.884<br>75614 | 3.795429<br>934     | 4.66E-<br>05    | 0.0028<br>56906 | Up       |
| PROCR        | 668.26<br>42693 | 1232.661524 | 103.8670151 | 0.0842<br>62397 | -<br>3.568967       | 5.01E-<br>09    | 2.24E-<br>06    | Dow<br>n |



|            |                 |             |             |                 |                     |                 |                 |      |
|------------|-----------------|-------------|-------------|-----------------|---------------------|-----------------|-----------------|------|
|            |                 |             |             |                 | 23                  |                 |                 |      |
| PROM2      | 575.38<br>11358 | 95.6116749  | 1055.150597 | 11.035<br>79242 | 3.464118<br>32      | 9.30E-<br>12    | 9.87E-<br>09    | Up   |
| PROS1      | 2298.3<br>91959 | 3944.030345 | 652.7535734 | 0.1655<br>04197 | -<br>2.595060<br>3  | 0.0003<br>16904 | 0.0116<br>66582 | Down |
| PRR15L     | 424.59<br>09024 | 110.6790535 | 738.5027513 | 6.6724<br>70789 | 2.738221<br>085     | 0.0017<br>3456  | 0.0366<br>39035 | Up   |
| PRR19      | 104.92<br>34626 | 65.37156355 | 144.4753617 | 2.2100<br>64344 | 1.144088<br>373     | 0.0378<br>60789 | 0.2626<br>37007 | Up   |
| PRR36      | 169.14<br>87641 | 78.28831497 | 260.0092132 | 3.3211<br>75239 | 1.731693<br>848     | 0.0159<br>36399 | 0.1594<br>43543 | Up   |
| PRR5L      | 111.47<br>68551 | 159.1673464 | 63.78636389 | 0.4007<br>50313 | -<br>1.319224<br>45 | 0.0407<br>04382 | 0.2723<br>53988 | Down |
| PRRG2      | 237.63<br>12126 | 92.06519059 | 383.1972346 | 4.1622<br>37999 | 2.057359<br>461     | 0.0055<br>98314 | 0.0795<br>80762 | Up   |
| PRRT4      | 64.747<br>59251 | 25.67748091 | 103.8177041 | 4.0431<br>42102 | 2.015476<br>91      | 0.0081<br>39712 | 0.1026<br>96151 | Up   |
| PRRX1      | 791.26<br>25357 | 1460.850369 | 121.6747025 | 0.0832<br>90325 | -<br>3.585707<br>26 | 0.0003<br>74235 | 0.0130<br>57685 | Down |
| PRRX2      | 933.29<br>03546 | 1640.327794 | 226.2529154 | 0.1379<br>31526 | -<br>2.857975<br>86 | 2.27E-<br>05    | 0.0016<br>4923  | Down |
| PRSS22     | 130.75<br>74609 | 11.9821399  | 249.5327819 | 20.825<br>3938  | 4.380271<br>872     | 1.13E-<br>06    | 0.0001<br>60814 | Up   |
| PRSS23     | 3912.7<br>76404 | 5875.578967 | 1949.97384  | 0.3318<br>77735 | -<br>1.591276<br>25 | 0.0359<br>4374  | 0.2545<br>69736 | Down |
| PRSS48     | 17.281<br>91493 | 34.37627053 | 0.187559335 | 0.0054<br>5607  | -<br>7.517922<br>15 | 0.0264<br>07153 | 0.2138<br>05489 | Down |
| PRSS8      | 2176.9<br>8444  | 921.1389632 | 3432.829918 | 3.7267<br>23171 | 1.897907<br>656     | 5.95E-<br>05    | 0.0034<br>40494 | Up   |
| PRUNE<br>2 | 3584.1<br>62999 | 6532.302954 | 636.0230436 | 0.0973<br>65822 | -<br>3.360440<br>76 | 0.0257<br>83392 | 0.2108<br>37084 | Down |
| PRX        | 128.20<br>36686 | 61.79351592 | 194.6138212 | 3.1494<br>21396 | 1.655086<br>805     | 0.0023<br>83536 | 0.0450<br>91696 | Up   |
| PSD        | 119.29<br>22468 | 48.36732578 | 190.2171679 | 3.9327<br>61732 | 1.975542<br>783     | 0.0003<br>38744 | 0.0121<br>96799 | Up   |
| PSD4       | 647.55<br>4297  | 340.7673954 | 954.3411985 | 2.8005<br>64876 | 1.485717<br>849     | 0.0015<br>16865 | 0.0333<br>94    | Up   |

|            |                 |             |             |                 |                     |                 |                 |      |
|------------|-----------------|-------------|-------------|-----------------|---------------------|-----------------|-----------------|------|
| PTCH2      | 253.43<br>93074 | 384.6435481 | 122.2350667 | 0.3177<br>87903 | -<br>1.653863<br>89 | 0.0055<br>49958 | 0.0792<br>10362 | Down |
| PTGDS      | 12913.<br>71387 | 3287.179046 | 22540.2487  | 6.8570<br>18856 | 2.777581<br>489     | 0.0374<br>55393 | 0.2620<br>8605  | Up   |
| PTGER<br>3 | 185.92<br>38095 | 339.4943826 | 32.35323629 | 0.0952<br>98296 | -<br>3.391405<br>77 | 0.0007<br>76964 | 0.0212<br>03712 | Down |
| PTGFR      | 220.02<br>46903 | 143.9933476 | 296.0560331 | 2.0560<br>39658 | 1.039868<br>093     | 0.0347<br>00955 | 0.2502<br>88092 | Up   |
| PTGFR<br>N | 4246.9<br>56092 | 7215.360649 | 1278.551535 | 0.1771<br>98562 | -<br>2.496561<br>19 | 0.0276<br>97295 | 0.2198<br>11488 | Down |
| PTGIR      | 109.53<br>81563 | 194.1177719 | 24.95854078 | 0.1285<br>74218 | -<br>2.959326<br>71 | 1.83E-<br>06    | 0.0002<br>3027  | Down |
| PTGIS      | 1558.8<br>24103 | 3024.570539 | 93.07766627 | 0.0307<br>73845 | -<br>5.022151<br>46 | 0.0001<br>32378 | 0.0062<br>18686 | Down |
| PTGS2      | 353.26<br>35691 | 659.3634632 | 47.16367497 | 0.0715<br>291   | -<br>3.805325<br>9  | 0.0379<br>83728 | 0.2626<br>37007 | Down |
| PTPDC<br>1 | 124.84<br>24974 | 201.4017115 | 48.28328326 | 0.2397<br>36211 | -<br>2.060480<br>26 | 0.0066<br>18265 | 0.0896<br>29795 | Down |
| PTPLA      | 220.09<br>39972 | 345.5850013 | 94.60299311 | 0.2737<br>47393 | -<br>1.869082<br>87 | 0.0289<br>06125 | 0.2264<br>16669 | Down |
| PTPN11     | 1044.9<br>33706 | 1586.062124 | 503.805289  | 0.3176<br>45369 | -<br>1.654511<br>11 | 0.0004<br>27737 | 0.0141<br>83742 | Down |
| PTPN14     | 385.48<br>6295  | 544.7687189 | 226.2038711 | 0.4152<br>29185 | -<br>1.268020<br>25 | 0.0094<br>3973  | 0.1138<br>81218 | Down |
| PTPN22     | 43.410<br>16679 | 22.13372183 | 64.68661175 | 2.9225<br>36583 | 1.547221<br>084     | 0.0195<br>88249 | 0.1815<br>78842 | Up   |
| PTPN6      | 923.70<br>65999 | 517.4332153 | 1329.979985 | 2.5703<br>41341 | 1.361959<br>962     | 0.0044<br>79205 | 0.0688<br>24856 | Up   |
| PTPN7      | 152.96<br>45303 | 69.74224929 | 236.1868113 | 3.3865<br>67163 | 1.759823<br>608     | 0.0016<br>75951 | 0.0357<br>82139 | Up   |
| PTPRK      | 1652.1<br>4214  | 929.7993707 | 2374.484909 | 2.5537<br>60504 | 1.352623<br>233     | 0.0032<br>51713 | 0.0551<br>81231 | Up   |
| PTPRQ      | 129.85<br>9365  | 255.2506721 | 4.468057918 | 0.0175<br>04588 | -<br>5.836123       | 0.0040<br>16603 | 0.0641<br>76703 | Down |

|               |                 |             |             |                 |                     |                 |                 |          |
|---------------|-----------------|-------------|-------------|-----------------|---------------------|-----------------|-----------------|----------|
|               |                 |             |             |                 | 06                  |                 |                 |          |
| PTPRS         | 2269.8<br>30653 | 3626.57194  | 913.0893658 | 0.2517<br>77541 | -<br>1.989778<br>5  | 7.72E-<br>05    | 0.0041<br>45252 | Dow<br>n |
| PTPRT         | 1637.1<br>18205 | 323.6282511 | 2950.608159 | 9.1172<br>76225 | 3.188602<br>885     | 0.0189<br>81188 | 0.1780<br>04743 | Up       |
| PTRF          | 20046.<br>78647 | 26759.01831 | 13334.55464 | 0.4983<br>20024 | -<br>1.004855<br>55 | 0.0177<br>85236 | 0.1711<br>08202 | Dow<br>n |
| PVRIG         | 137.08<br>94802 | 54.61674404 | 219.5622163 | 4.0200<br>53195 | 2.007214<br>592     | 0.0004<br>83859 | 0.0151<br>53362 | Up       |
| PVRL3         | 142.81<br>56108 | 252.266396  | 33.36482562 | 0.1322<br>60286 | -<br>2.918548<br>17 | 8.74E-<br>05    | 0.0045<br>28677 | Dow<br>n |
| PVRL4         | 629.92<br>66948 | 241.5493024 | 1018.304087 | 4.2157<br>19429 | 2.075778<br>854     | 0.0048<br>96956 | 0.0733<br>6893  | Up       |
| PXDN          | 4433.1<br>30716 | 6429.219202 | 2437.042229 | 0.3790<br>57262 | -<br>1.399512<br>29 | 0.0024<br>22586 | 0.0455<br>21911 | Dow<br>n |
| PYROX<br>D2   | 345.10<br>80902 | 105.8283103 | 584.38787   | 5.5220<br>37236 | 2.465200<br>616     | 9.83E-<br>07    | 0.0001<br>47102 | Up       |
| QKI           | 473.01<br>23156 | 685.2719449 | 260.7526864 | 0.3805<br>09794 | -<br>1.393994<br>51 | 0.0051<br>73911 | 0.0760<br>03405 | Dow<br>n |
| QPCT          | 577.55<br>04332 | 1086.2467   | 68.85416666 | 0.0633<br>87227 | -<br>3.979664<br>02 | 0.0278<br>65398 | 0.2207<br>571   | Dow<br>n |
| QPRT          | 231.00<br>52611 | 146.0158937 | 315.9946285 | 2.1641<br>11184 | 1.113774<br>621     | 0.0422<br>60896 | 0.2772<br>16112 | Up       |
| RAB11<br>FIP4 | 74.165<br>4241  | 35.21430236 | 113.1165459 | 3.2122<br>3305  | 1.683576<br>565     | 0.0052<br>32612 | 0.0764<br>91965 | Up       |
| RAB15         | 1015.2<br>11431 | 267.8637292 | 1762.559132 | 6.5800<br>58964 | 2.718100<br>512     | 1.04E-<br>05    | 0.0008<br>75776 | Up       |
| RAB17         | 77.842<br>96122 | 20.21323079 | 135.4726917 | 6.7021<br>79036 | 2.744630<br>226     | 0.0002<br>55955 | 0.0099<br>14059 | Up       |
| RAB19         | 48.572<br>28783 | 17.99208118 | 79.15249449 | 4.3992<br>96208 | 2.137272<br>742     | 0.0419<br>49658 | 0.2763<br>80524 | Up       |
| RAB23         | 194.74<br>9436  | 309.8586419 | 79.64023015 | 0.2570<br>21168 | -<br>1.960040<br>91 | 0.0003<br>73859 | 0.0130<br>57685 | Dow<br>n |
| RAB24         | 1246.3<br>51981 | 806.5456685 | 1686.158293 | 2.0905<br>9246  | 1.063911<br>85      | 0.0212<br>70464 | 0.1893<br>01998 | Up       |
| RAB25         | 621.41<br>54366 | 182.8524675 | 1059.978406 | 5.7969<br>05122 | 2.535282<br>873     | 6.30E-<br>07    | 0.0001<br>0515  | Up       |

|              |                 |             |             |                 |                     |                 |                 |          |
|--------------|-----------------|-------------|-------------|-----------------|---------------------|-----------------|-----------------|----------|
| RAB30        | 512.17<br>08765 | 803.2548405 | 221.0869126 | 0.2752<br>38818 | -<br>1.861244<br>14 | 0.0004<br>42452 | 0.0144<br>06852 | Dow<br>n |
| RAB31        | 1828.0<br>99053 | 2920.257213 | 735.9408926 | 0.2520<br>12353 | -<br>1.988433<br>64 | 0.0350<br>56064 | 0.2516<br>41996 | Dow<br>n |
| RAB37        | 116.56<br>15992 | 73.24955632 | 159.8736421 | 2.1825<br>88539 | 1.126040<br>179     | 0.0329<br>28674 | 0.2428<br>45607 | Up       |
| RAB3B        | 13.278<br>74181 | 25.90055872 | 0.656924908 | 0.0253<br>63349 | -<br>5.301110<br>94 | 0.0004<br>76833 | 0.0150<br>54346 | Dow<br>n |
| RAB3C        | 112.83<br>74079 | 172.1060896 | 53.56872613 | 0.3112<br>54101 | -<br>1.683835<br>25 | 0.0036<br>05289 | 0.0591<br>91673 | Dow<br>n |
| RAB3IL<br>1  | 476.32<br>08925 | 739.7843513 | 212.8574337 | 0.2877<br>2903  | -<br>1.797217<br>31 | 0.0007<br>71157 | 0.0210<br>77125 | Dow<br>n |
| RAB6B        | 25.591<br>05785 | 49.2565436  | 1.925572092 | 0.0390<br>92716 | -<br>4.676956<br>35 | 4.63E-<br>05    | 0.0028<br>49282 | Dow<br>n |
| RAC2         | 562.20<br>85595 | 302.7266414 | 821.6904775 | 2.7142<br>98529 | 1.440579<br>403     | 0.0024<br>52308 | 0.0458<br>46759 | Up       |
| RAI14        | 1489.2<br>34789 | 2021.10016  | 957.3694168 | 0.4736<br>8727  | -<br>1.077993<br>19 | 0.0090<br>20393 | 0.1103<br>92717 | Dow<br>n |
| RAI2         | 366.60<br>81358 | 493.2238968 | 239.9923747 | 0.4865<br>78968 | -<br>1.039254<br>13 | 0.0465<br>84387 | 0.2939<br>26463 | Dow<br>n |
| RAP1G<br>AP  | 386.09<br>83612 | 80.27483287 | 691.9218896 | 8.6194<br>12397 | 3.107589<br>521     | 2.07E-<br>05    | 0.0015<br>40749 | Up       |
| RAP1G<br>AP2 | 303.12<br>5984  | 87.30798466 | 518.9439833 | 5.9438<br>31889 | 2.571393<br>312     | 0.0017<br>31611 | 0.0366<br>19619 | Up       |
| RAP2A        | 200.27<br>09038 | 277.3228815 | 123.2189262 | 0.4443<br>15758 | -<br>1.170342<br>79 | 0.0327<br>93465 | 0.2425<br>90527 | Dow<br>n |
| RAPGE<br>FL1 | 395.37<br>06605 | 203.0448716 | 587.6964494 | 2.8944<br>16612 | 1.533272<br>593     | 0.0014<br>06025 | 0.0318<br>12389 | Up       |
| RARRE<br>S1  | 8207.7<br>94257 | 15825.67364 | 589.9148707 | 0.0372<br>75814 | -<br>4.745616<br>32 | 0.0446<br>22844 | 0.2868<br>67956 | Dow<br>n |
| RASA4<br>B   | 641.44<br>87851 | 891.7678286 | 391.1297416 | 0.4386<br>00417 | -<br>1.189020<br>91 | 0.0252<br>85754 | 0.2083<br>73556 | Dow<br>n |
| RASAL        | 3325.5          | 1483.017663 | 5168.068143 | 3.4848          | 1.801089            | 0.0424          | 0.2780          | Up       |

|          |                 |             |             |                 |                     |                 |                 |      |
|----------|-----------------|-------------|-------------|-----------------|---------------------|-----------------|-----------------|------|
| 1        | 42903           |             |             | 32496           | 312                 | 47908           | 3219            |      |
| RASAL3   | 161.07<br>14094 | 75.34476956 | 246.7980493 | 3.2755<br>8304  | 1.711751<br>723     | 0.0026<br>36963 | 0.0477<br>72554 | Up   |
| RASGEF1C | 87.089<br>28031 | 8.448001822 | 165.7305588 | 19.617<br>7229  | 4.294085<br>687     | 0.0007<br>48815 | 0.0206<br>71255 | Up   |
| RASGRP2  | 268.35<br>51388 | 405.663015  | 131.0472626 | 0.3230<br>4464  | -<br>1.630194<br>56 | 0.0009<br>78761 | 0.0250<br>6596  | Down |
| RASGRP3  | 631.49<br>47389 | 882.2635246 | 380.7259533 | 0.4315<br>33145 | -<br>1.212456<br>72 | 0.0087<br>83104 | 0.1086<br>68325 | Down |
| RASL12   | 1308.6<br>66065 | 2121.649265 | 495.6828651 | 0.2336<br>30918 | -<br>2.097696<br>89 | 0.0254<br>72673 | 0.2090<br>5439  | Down |
| RASSF6   | 192.43<br>87508 | 48.47851574 | 336.3989859 | 6.9391<br>35425 | 2.794755<br>923     | 0.0012<br>5925  | 0.0295<br>39158 | Up   |
| RASSF7   | 204.14<br>29246 | 88.70765807 | 319.578191  | 3.6025<br>99798 | 1.849038<br>396     | 0.0010<br>46592 | 0.0262<br>57968 | Up   |
| RASSF8   | 626.85<br>69432 | 911.3380767 | 342.3758096 | 0.3756<br>84741 | -<br>1.412405<br>57 | 0.0113<br>11796 | 0.1282<br>24699 | Down |
| RASSF9   | 296.41<br>80385 | 478.8783694 | 113.9577076 | 0.2379<br>67958 | -<br>2.071160<br>77 | 0.0075<br>51883 | 0.0978<br>65241 | Down |
| RAVER2   | 135.56<br>54864 | 230.7493366 | 40.38163621 | 0.1750<br>02177 | -<br>2.514555<br>23 | 0.0186<br>33976 | 0.1760<br>11696 | Down |
| RBBP8NL  | 400.73<br>85596 | 143.5666353 | 657.9104839 | 4.5826<br>14076 | 2.196170<br>795     | 2.70E-<br>05    | 0.0018<br>82216 | Up   |
| RBFOX2   | 2124.6<br>941   | 2876.241288 | 1373.146911 | 0.4774<br>10194 | -<br>1.066698<br>72 | 0.0445<br>19069 | 0.2863<br>02849 | Down |
| RBMS3    | 619.47<br>70873 | 924.9698424 | 313.9843323 | 0.3394<br>53589 | -<br>1.558713<br>76 | 0.0016<br>1054  | 0.0349<br>15671 | Down |
| RBP4     | 1061.1<br>01514 | 1892.291341 | 229.911687  | 0.1214<br>99096 | -<br>3.040982<br>52 | 1.59E-<br>09    | 8.69E-<br>07    | Down |
| RBPJ     | 1495.4<br>39164 | 1997.710515 | 993.1678127 | 0.4971<br>53018 | -<br>1.008238<br>13 | 0.0493<br>1343  | 0.3030<br>20077 | Down |
| RBPMS    | 1752.1<br>34077 | 2690.211209 | 814.0569456 | 0.3025<br>99641 | -<br>1.724517<br>82 | 0.0079<br>97789 | 0.1020<br>31205 | Down |

|            |                 |             |             |                 |                     |                 |                 |          |
|------------|-----------------|-------------|-------------|-----------------|---------------------|-----------------|-----------------|----------|
| RCAN2      | 238.58<br>61756 | 371.0303576 | 106.1419936 | 0.2860<br>73609 | -<br>1.805541<br>68 | 0.0005<br>20131 | 0.0159<br>02786 | Dow<br>n |
| RCN1       | 8449.3<br>91104 | 15102.47624 | 1796.305965 | 0.1189<br>41155 | -<br>3.071680<br>11 | 0.0010<br>65521 | 0.0265<br>15472 | Dow<br>n |
| RCN3       | 2847.5<br>48132 | 5017.90735  | 677.1889138 | 0.1349<br>54447 | -<br>2.889455<br>57 | 7.94E-<br>05    | 0.0042<br>15069 | Dow<br>n |
| RDH13      | 479.54<br>08367 | 306.8118826 | 652.2697908 | 2.1259<br>60003 | 1.088114<br>455     | 0.0317<br>96058 | 0.2392<br>86231 | Up       |
| RDH16      | 43.674<br>54811 | 4.693729306 | 82.65536692 | 17.609<br>74303 | 4.138301<br>952     | 0.0081<br>2639  | 0.1026<br>96151 | Up       |
| RDX        | 2454.3<br>73668 | 3349.916446 | 1558.830889 | 0.4653<br>3426  | -<br>1.103660<br>69 | 0.0121<br>55981 | 0.1346<br>1126  | Dow<br>n |
| RECK       | 865.43<br>51142 | 1381.996782 | 348.8734465 | 0.2524<br>41577 | -<br>1.985978<br>56 | 6.97E-<br>05    | 0.0039<br>03456 | Dow<br>n |
| RELB       | 790.95<br>14239 | 441.1017863 | 1140.801061 | 2.5862<br>53551 | 1.370863<br>721     | 0.0021<br>08281 | 0.0412<br>20089 | Up       |
| RELN       | 699.58<br>61279 | 1213.677735 | 185.4945212 | 0.1528<br>36718 | -<br>2.709936<br>92 | 2.26E-<br>05    | 0.0016<br>4923  | Dow<br>n |
| REM1       | 423.14<br>43859 | 573.0408811 | 273.2478908 | 0.4768<br>38389 | -<br>1.068427<br>71 | 0.0172<br>5326  | 0.1675<br>58038 | Dow<br>n |
| REPS2      | 184.48<br>47141 | 39.00053132 | 329.9688968 | 8.4606<br>2568  | 3.080764<br>357     | 2.43E-<br>08    | 7.69E-<br>06    | Up       |
| REV3L      | 1913.8<br>03361 | 2916.05085  | 911.5558734 | 0.3125<br>99444 | -<br>1.677612<br>88 | 0.0421<br>34164 | 0.2771<br>25457 | Dow<br>n |
| RFX3       | 239.71<br>03924 | 123.5665858 | 355.854199  | 2.8798<br>57825 | 1.525997<br>589     | 0.0016<br>78125 | 0.0357<br>82139 | Up       |
| RGL1       | 1015.6<br>18772 | 1366.237556 | 664.9999889 | 0.4867<br>38186 | -<br>1.038782<br>13 | 0.0092<br>83255 | 0.1121<br>63852 | Dow<br>n |
| RGS10      | 166.90<br>23523 | 91.69233827 | 242.1123664 | 2.6404<br>86337 | 1.400803<br>676     | 0.0036<br>49356 | 0.0595<br>01686 | Up       |
| RGS7       | 190.51<br>25847 | 300.5551616 | 80.47000788 | 0.2677<br>379   | -<br>1.901106<br>72 | 0.0069<br>69413 | 0.0925<br>78231 | Dow<br>n |
| RHBDD<br>1 | 302.53<br>23814 | 199.3068543 | 405.7579085 | 2.0358<br>45229 | 1.025627<br>888     | 0.0471<br>00952 | 0.2959<br>31755 | Up       |

|             |                 |             |             |                 |                     |                 |                 |      |
|-------------|-----------------|-------------|-------------|-----------------|---------------------|-----------------|-----------------|------|
| RHBDD<br>2  | 926.88<br>66454 | 590.9625603 | 1262.810731 | 2.1368<br>70955 | 1.095499<br>787     | 0.0146<br>68676 | 0.1520<br>66696 | Up   |
| RHBG        | 651.16<br>39234 | 281.2664448 | 1021.061402 | 3.6302<br>2828  | 1.860060<br>272     | 0.0166<br>62174 | 0.1641<br>99265 | Up   |
| RHOB        | 4808.1<br>3037  | 7019.905488 | 2596.355252 | 0.3698<br>56155 | -<br>1.434963<br>81 | 0.0008<br>35818 | 0.0222<br>37931 | Down |
| RHOBT<br>B3 | 2260.6<br>17193 | 3322.741521 | 1198.492865 | 0.3606<br>9398  | -<br>1.471152<br>75 | 0.0004<br>06895 | 0.0136<br>89126 | Down |
| RHOJ        | 987.16<br>35193 | 1331.545414 | 642.7816246 | 0.4827<br>33535 | -<br>1.050701<br>04 | 0.0263<br>44788 | 0.2134<br>92194 | Down |
| RHOQ        | 515.72<br>06337 | 737.5302782 | 293.9109891 | 0.3985<br>07014 | -<br>1.327322<br>98 | 0.0102<br>56164 | 0.1204<br>49832 | Down |
| RHOV        | 366.54<br>83283 | 86.61973375 | 646.4769229 | 7.4633<br>90788 | 2.899831<br>228     | 0.0033<br>60153 | 0.0565<br>31304 | Up   |
| RIC1        | 302.86<br>70022 | 412.6121144 | 193.12189   | 0.4680<br>47067 | -<br>1.095274<br>48 | 0.0310<br>91976 | 0.2360<br>01279 | Down |
| RIC3        | 396.64<br>08734 | 117.6171283 | 675.6646186 | 5.7446<br>10743 | 2.522209<br>139     | 8.54E-<br>06    | 0.0007<br>54974 | Up   |
| RINL        | 103.76<br>66617 | 62.78134686 | 144.7519765 | 2.3056<br>52613 | 1.205175<br>162     | 0.0262<br>40872 | 0.2129<br>3706  | Up   |
| RIPK4       | 571.14<br>54751 | 186.0278204 | 956.2631298 | 5.1404<br>30759 | 2.361889<br>26      | 0.0002<br>37876 | 0.0095<br>56902 | Up   |
| RIPPLY<br>3 | 71.892<br>97714 | 6.599093261 | 137.186861  | 20.788<br>74409 | 4.377730<br>698     | 0.0016<br>02552 | 0.0348<br>29446 | Up   |
| RNF128      | 675.09<br>07814 | 288.8154253 | 1061.366138 | 3.6748<br>94222 | 1.877702<br>724     | 8.98E-<br>05    | 0.0046<br>39883 | Up   |
| RNF149      | 1785.5<br>36814 | 938.1946429 | 2632.878984 | 2.8063<br>24897 | 1.488682<br>044     | 0.0004<br>79256 | 0.0150<br>615   | Up   |
| RNF208      | 193.59<br>61398 | 94.47618948 | 292.7160901 | 3.0983<br>05421 | 1.631479<br>368     | 0.0079<br>35076 | 0.1014<br>46377 | Up   |
| RNF39       | 190.80<br>26754 | 81.05657789 | 300.5487728 | 3.7078<br>88744 | 1.890597<br>956     | 0.0003<br>36834 | 0.0121<br>52305 | Up   |
| RNPEP       | 1356.1<br>23638 | 658.2192232 | 2054.028052 | 3.1205<br>83508 | 1.641815<br>819     | 0.0002<br>78593 | 0.0105<br>80086 | Up   |
| ROBO3       | 71.606<br>5406  | 139.6475849 | 3.565496309 | 0.0255<br>32101 | -<br>5.291543<br>9  | 2.08E-<br>10    | 1.57E-<br>07    | Down |
| ROCK1       | 2615.2<br>54022 | 3518.72159  | 1711.786455 | 0.4864<br>79652 | -<br>1.039548       | 0.0310<br>56004 | 0.2360<br>01279 | Down |

|             |                 |             |             |                 |                     |                 |                 |          |
|-------------|-----------------|-------------|-------------|-----------------|---------------------|-----------------|-----------------|----------|
|             |                 |             |             |                 | 63                  |                 |                 |          |
| ROCK2       | 1334.2<br>45668 | 2123.852273 | 544.639063  | 0.2564<br>3924  | -<br>1.963311<br>06 | 0.0006<br>66036 | 0.0189<br>20666 | Dow<br>n |
| ROGDI       | 2799.2<br>09028 | 1391.327989 | 4207.090066 | 3.0237<br>94605 | 1.596360<br>146     | 0.0004<br>39855 | 0.0143<br>8558  | Up       |
| ROR2        | 200.58<br>11285 | 322.7434244 | 78.4188326  | 0.2429<br>75772 | -<br>2.041115<br>63 | 0.0075<br>73434 | 0.0980<br>03712 | Dow<br>n |
| RORC        | 738.80<br>75262 | 98.3864344  | 1379.228618 | 14.018<br>48361 | 3.809258<br>395     | 3.53E-<br>07    | 6.50E-<br>05    | Up       |
| RPH3A<br>L  | 393.27<br>54066 | 223.2281035 | 563.3227097 | 2.5235<br>29524 | 1.335442<br>966     | 0.0029<br>21316 | 0.0514<br>12306 | Up       |
| RPP40       | 229.12<br>16103 | 332.5117856 | 125.731435  | 0.3781<br>26251 | -<br>1.403060<br>08 | 0.0054<br>6812  | 0.0786<br>5982  | Dow<br>n |
| RPS6K<br>A1 | 571.85<br>92477 | 296.4525186 | 847.2659768 | 2.8580<br>15782 | 1.515013<br>883     | 0.0012<br>96231 | 0.0300<br>89198 | Up       |
| RPS6K<br>A2 | 651.40<br>70397 | 906.7135557 | 396.1005236 | 0.4368<br>52985 | -<br>1.194780<br>25 | 0.0136<br>69265 | 0.1448<br>2909  | Dow<br>n |
| RPS6K<br>A6 | 658.14<br>93865 | 383.6846807 | 932.6140922 | 2.4306<br>78469 | 1.281359<br>066     | 0.0041<br>71594 | 0.0653<br>61438 | Up       |
| RPS6K<br>C1 | 803.02<br>60358 | 1091.581701 | 514.4703701 | 0.4713<br>0725  | -<br>1.085260<br>22 | 0.0466<br>23711 | 0.2940<br>12292 | Dow<br>n |
| RPS6K<br>L1 | 271.82<br>41284 | 371.7100479 | 171.9382089 | 0.4625<br>60025 | -<br>1.112287<br>5  | 0.0228<br>51685 | 0.1971<br>40861 | Dow<br>n |
| RRAS        | 1331.7<br>22982 | 2099.591666 | 563.8542975 | 0.2685<br>54265 | -<br>1.896714<br>46 | 0.0140<br>22721 | 0.1474<br>96128 | Dow<br>n |
| RRM2        | 279.88<br>63323 | 376.0253817 | 183.7472829 | 0.4886<br>56596 | -<br>1.033107<br>13 | 0.0411<br>61627 | 0.2738<br>47143 | Dow<br>n |
| RSG1        | 284.60<br>33641 | 158.8284144 | 410.3783138 | 2.5837<br>83987 | 1.369485<br>461     | 0.0097<br>90654 | 0.1165<br>76641 | Up       |
| RSPH3       | 173.91<br>78134 | 111.2273444 | 236.6082823 | 2.1272<br>49226 | 1.088989<br>068     | 0.0242<br>97519 | 0.2044<br>32346 | Up       |
| RSPO2       | 24.795<br>43417 | 48.03709239 | 1.553775943 | 0.0323<br>45337 | -<br>4.950298<br>45 | 0.0009<br>97278 | 0.0253<br>01271 | Dow<br>n |
| RSPO3       | 144.13<br>20535 | 288.0765476 | 0.187559335 | 0.0006<br>51075 | -<br>10.58488       | 0.0025<br>51371 | 0.0469<br>93118 | Dow<br>n |



|             |                 |             |             |                 |                     |                 |                 |          |
|-------------|-----------------|-------------|-------------|-----------------|---------------------|-----------------|-----------------|----------|
|             |                 |             |             |                 | 94                  |                 |                 |          |
| RSU1        | 1581.9<br>03437 | 2219.299288 | 944.5075857 | 0.4255<br>88198 | -<br>1.232469<br>95 | 0.0221<br>83297 | 0.1939<br>5613  | Dow<br>n |
| RTKN        | 540.36<br>93122 | 243.0030788 | 837.7355456 | 3.4474<br>27702 | 1.785520<br>296     | 0.0067<br>29445 | 0.0904<br>56371 | Up       |
| RTP3        | 16.682<br>76793 | 4.074092561 | 29.2914433  | 7.1896<br>85276 | 2.845928<br>619     | 0.0070<br>22275 | 0.0930<br>31767 | Up       |
| RUFY4       | 9.8611<br>62888 | 2.923461523 | 16.79886425 | 5.7462<br>23823 | 2.522614<br>189     | 0.0412<br>76303 | 0.2741<br>80238 | Up       |
| RUNX1<br>T1 | 36.336<br>69478 | 57.50593555 | 15.16745401 | 0.2637<br>54582 | -<br>1.922731<br>94 | 0.0266<br>6398  | 0.2153<br>05072 | Dow<br>n |
| RUSC2       | 1830.6<br>91578 | 2457.898159 | 1203.484998 | 0.4896<br>39895 | -<br>1.030206<br>98 | 0.0490<br>19325 | 0.3025<br>85691 | Dow<br>n |
| RXFP2       | 7.8540<br>3934  | 15.70807868 | 0           | 0               | #NAME<br>?          | 0.0022<br>42898 | 0.0433<br>67474 | Dow<br>n |
| RXRG        | 17.965<br>394   | 34.94540063 | 0.985387362 | 0.0281<br>97913 | -<br>5.148267<br>81 | 7.68E-<br>05    | 0.0041<br>45252 | Dow<br>n |
| RYR3        | 1672.0<br>44857 | 742.4862319 | 2601.603483 | 3.5039<br>08047 | 1.808964<br>915     | 5.95E-<br>05    | 0.0034<br>40494 | Up       |
| S100A1<br>0 | 3371.5<br>19456 | 5044.37624  | 1698.662672 | 0.3367<br>43849 | -<br>1.570276<br>5  | 0.0020<br>83821 | 0.0409<br>75964 | Dow<br>n |
| S100A2      | 753.92<br>09046 | 267.9667745 | 1239.875035 | 4.6269<br>73016 | 2.210068<br>685     | 1.96E-<br>06    | 0.0002<br>43572 | Up       |
| S100A4      | 6198.0<br>60271 | 11424.66443 | 971.4561174 | 0.0850<br>31479 | -<br>3.555859<br>15 | 7.92E-<br>05    | 0.0042<br>14433 | Dow<br>n |
| S100A6      | 117.60<br>74281 | 183.1308894 | 52.08396674 | 0.2844<br>08419 | -<br>1.813963<br>92 | 0.0032<br>26555 | 0.0550<br>13076 | Dow<br>n |
| S100G       | 114.08<br>27603 | 228.1655206 | 0           | 0               | #NAME<br>?          | 0.0215<br>26873 | 0.1905<br>42748 | Dow<br>n |
| S1PR2       | 650.27<br>94489 | 909.1696732 | 391.3892247 | 0.4304<br>90849 | -<br>1.215945<br>52 | 0.0170<br>34853 | 0.1663<br>19009 | Dow<br>n |
| S1PR3       | 193.05<br>8137  | 295.5681446 | 90.54812948 | 0.3063<br>52803 | -<br>1.706734<br>04 | 0.0028<br>81037 | 0.0510<br>52092 | Dow<br>n |
| SAA3        | 4156.2<br>05196 | 551.8953449 | 7760.515048 | 14.061<br>57004 | 3.813685<br>782     | 0.0001<br>92784 | 0.0081<br>4432  | Up       |

|            |                 |             |             |                 |                     |                 |                 |          |
|------------|-----------------|-------------|-------------|-----------------|---------------------|-----------------|-----------------|----------|
| SACS       | 655.34<br>36073 | 1096.517496 | 214.1697184 | 0.1953<br>18104 | -<br>2.356102<br>42 | 0.0064<br>50221 | 0.0880<br>81407 | Dow<br>n |
| SALL2      | 320.09<br>0673  | 144.5476061 | 495.6337398 | 3.4288<br>61627 | 1.777729<br>685     | 0.0096<br>16451 | 0.1153<br>301   | Up       |
| SAMD1<br>0 | 87.095<br>93773 | 46.62668235 | 127.5651931 | 2.7358<br>83976 | 1.452007<br>05      | 0.0253<br>80567 | 0.2087<br>51475 | Up       |
| SAMD1<br>4 | 159.30<br>18669 | 264.877351  | 53.72638278 | 0.2028<br>34944 | -<br>2.301621<br>87 | 0.0149<br>11301 | 0.1538<br>81552 | Dow<br>n |
| SAMD4<br>A | 1626.9<br>20976 | 2646.161691 | 607.6802618 | 0.2296<br>4593  | -<br>2.122516<br>88 | 0.0092<br>81376 | 0.1121<br>63852 | Dow<br>n |
| SAMSN<br>1 | 150.80<br>05746 | 94.58616297 | 207.0149862 | 2.1886<br>39223 | 1.130034<br>159     | 0.0328<br>64026 | 0.2426<br>66465 | Up       |
| SAP25      | 215.37<br>34866 | 135.9514515 | 294.7955217 | 2.1683<br>88189 | 1.116623<br>054     | 0.0214<br>27978 | 0.1901<br>32458 | Up       |
| SAPCD<br>2 | 544.95<br>18258 | 199.2891584 | 890.6144931 | 4.4689<br>56064 | 2.159937<br>861     | 0.0475<br>54456 | 0.2974<br>13932 | Up       |
| SARM1      | 212.34<br>85235 | 296.9606032 | 127.7364437 | 0.4301<br>46095 | -<br>1.217101<br>36 | 0.0229<br>44977 | 0.1973<br>79326 | Dow<br>n |
| SASH1      | 2269.2<br>29835 | 3041.438118 | 1497.021553 | 0.4922<br>08454 | -<br>1.022658<br>66 | 0.0308<br>14961 | 0.2354<br>38829 | Dow<br>n |
| SASH3      | 334.34<br>63557 | 185.2735793 | 483.4191321 | 2.6092<br>1786  | 1.383617<br>409     | 0.0057<br>42366 | 0.0813<br>08118 | Up       |
| SAT1       | 5946.6<br>52274 | 3630.234716 | 8263.069831 | 2.2761<br>80599 | 1.186615<br>03      | 0.0086<br>27756 | 0.1072<br>61267 | Up       |
| SBK2       | 17.510<br>30497 | 3.78750105  | 31.23310888 | 8.2463<br>63095 | 3.043757<br>986     | 0.0064<br>17845 | 0.0879<br>72275 | Up       |
| SCARA<br>5 | 4105.8<br>53257 | 7259.170809 | 952.5357038 | 0.1312<br>18252 | -<br>2.929959<br>69 | 0.0229<br>03504 | 0.1972<br>79526 | Dow<br>n |
| SCARF<br>2 | 849.22<br>64586 | 1402.034291 | 296.4186258 | 0.2114<br>20382 | -<br>2.241813<br>63 | 1.56E-<br>05    | 0.0012<br>12709 | Dow<br>n |
| SCG2       | 69.297<br>27705 | 138.4069948 | 0.187559335 | 0.0013<br>55129 | -<br>9.527354<br>07 | 0.0496<br>26121 | 0.3044<br>91699 | Dow<br>n |
| SCG3       | 37.526<br>89766 | 68.85250075 | 6.201294568 | 0.0900<br>66367 | -<br>3.472867<br>73 | 0.0080<br>62481 | 0.1023<br>49815 | Dow<br>n |
| SCGB1      | 1255.5          | 140.2626334 | 2370.819456 | 16.902          | 4.079183            | 9.34E-          | 2.81E-          | Up       |

|             |                 |             |             |                 |                     |                 |                 |      |
|-------------|-----------------|-------------|-------------|-----------------|---------------------|-----------------|-----------------|------|
| D           | 41045           |             |             | 71599           | 178                 | 16              | 12              |      |
| SCGB2<br>A2 | 218.26<br>74319 | 27.39659977 | 409.138264  | 14.933<br>90667 | 3.900519<br>715     | 0.0008<br>13941 | 0.0217<br>95968 | Up   |
| SCHIP1      | 376.32<br>25926 | 657.3600368 | 95.28514837 | 0.1449<br>51234 | -<br>2.786360<br>48 | 0.0028<br>41852 | 0.0506<br>56293 | Down |
| SCML1       | 108.46<br>96257 | 182.4614254 | 34.47782601 | 0.1889<br>59535 | -<br>2.403850<br>78 | 0.0002<br>2084  | 0.0089<br>92616 | Down |
| SCML4       | 113.40<br>22405 | 42.45798005 | 184.3465009 | 4.3418<br>57542 | 2.118312<br>391     | 0.0190<br>42795 | 0.1784<br>48305 | Up   |
| SCN3A       | 323.49<br>1204  | 617.563908  | 29.41850007 | 0.0476<br>36366 | -<br>4.391792<br>84 | 2.57E-<br>07    | 5.21E-<br>05    | Down |
| SCN5A       | 70.317<br>64218 | 2.858045934 | 137.7772384 | 48.206<br>7964  | 5.591164<br>653     | 0.0283<br>31694 | 0.2231<br>77042 | Up   |
| SCNN1<br>D  | 130.32<br>01357 | 51.92321903 | 208.7170523 | 4.0197<br>24822 | 2.007096<br>742     | 0.0240<br>40957 | 0.2032<br>21566 | Up   |
| SCRG1       | 32.188<br>72682 | 14.59791554 | 49.7795381  | 3.4100<br>4426  | 1.769790<br>464     | 0.0246<br>30474 | 0.2058<br>89307 | Up   |
| SCRN1       | 317.91<br>14307 | 607.4035579 | 28.4193035  | 0.0467<br>88174 | -<br>4.417712<br>26 | 7.80E-<br>07    | 0.0001<br>26737 | Down |
| SCUBE<br>2  | 1171.7<br>17319 | 1729.173069 | 614.2615693 | 0.3552<br>34291 | -<br>1.493157<br>24 | 0.0004<br>33013 | 0.0142<br>79917 | Down |
| SCX         | 15.942<br>35492 | 30.05245018 | 1.832259658 | 0.0609<br>68728 | -<br>4.035786<br>74 | 0.0055<br>87823 | 0.0795<br>62089 | Down |
| SDK1        | 774.57<br>54276 | 1051.407508 | 497.7433469 | 0.4734<br>06689 | -<br>1.078848<br>01 | 0.0320<br>74708 | 0.2404<br>47481 | Down |
| SDR42<br>E1 | 119.51<br>40207 | 62.41358287 | 176.6144585 | 2.8297<br>43949 | 1.500671<br>516     | 0.0067<br>56176 | 0.0906<br>80552 | Up   |
| SDR9C<br>7  | 334.92<br>5786  | 19.8569587  | 649.9946133 | 32.733<br>84526 | 5.032711<br>181     | 2.31E-<br>07    | 4.79E-<br>05    | Up   |
| SEC14L<br>2 | 31.402<br>97071 | 10.43774323 | 52.36819818 | 5.0171<br>9548  | 2.326881<br>15      | 0.0149<br>05336 | 0.1538<br>81552 | Up   |
| SEC14L<br>4 | 40.844<br>5979  | 5.543502166 | 76.14569363 | 13.736<br>02668 | 3.779892<br>841     | 2.47E-<br>06    | 0.0002<br>93033 | Up   |
| SEC23<br>A  | 1606.9<br>50967 | 2671.165809 | 542.7361254 | 0.2031<br>83241 | -<br>2.299146<br>69 | 0.0020<br>39195 | 0.0404<br>79788 | Down |
| SEC24       | 3023.7          | 4188.290256 | 1859.284175 | 0.4439          | -                   | 0.0030          | 0.0534          | Down |

|                |                 |             |             |                 |                     |                 |                 |          |
|----------------|-----------------|-------------|-------------|-----------------|---------------------|-----------------|-----------------|----------|
| D              | 87215           |             |             | 24385           | 1.171614<br>14      | 97943           | 64611           | n        |
| SEMA3<br>B     | 1311.5<br>3202  | 2116.385265 | 506.678774  | 0.2394<br>07627 | -<br>2.062458<br>98 | 4.81E-<br>05    | 0.0029<br>3994  | Dow<br>n |
| SEMA3<br>C     | 1234.2<br>34321 | 2265.78308  | 202.6855615 | 0.0894<br>54972 | -<br>3.482694<br>52 | 3.63E-<br>07    | 6.51E-<br>05    | Dow<br>n |
| SEMA3<br>D     | 81.685<br>20713 | 155.798127  | 7.572287282 | 0.0486<br>03198 | -<br>4.362804<br>93 | 0.0041<br>85383 | 0.0653<br>68072 | Dow<br>n |
| SEMA3<br>G     | 2097.9<br>2501  | 1147.309479 | 3048.54054  | 2.6571<br>21376 | 1.409864<br>131     | 0.0381<br>13488 | 0.2629<br>59243 | Up       |
| SEMA4<br>A     | 1141.4<br>7794  | 619.8766266 | 1663.079254 | 2.6829<br>19766 | 1.423803<br>911     | 0.0024<br>89196 | 0.0461<br>59446 | Up       |
| SEMA4<br>B     | 606.03<br>94682 | 289.3104038 | 922.7685327 | 3.1895<br>44934 | 1.673350<br>603     | 0.0003<br>12403 | 0.0115<br>24399 | Up       |
| SEMA4<br>D     | 1133.0<br>34157 | 626.5653653 | 1639.50295  | 2.6166<br>51095 | 1.387721<br>568     | 0.0018<br>44627 | 0.0378<br>12752 | Up       |
| SEMA5<br>A     | 1957.0<br>40317 | 3063.168701 | 850.9119326 | 0.2777<br>88139 | -<br>1.847943<br>1  | 0.0094<br>73341 | 0.1141<br>54713 | Dow<br>n |
| SEMA5<br>B     | 140.84<br>54656 | 227.4857344 | 54.2051968  | 0.2382<br>79543 | -<br>2.069273       | 0.0005<br>16143 | 0.0158<br>7298  | Dow<br>n |
| 1-Sep          | 204.97<br>30622 | 86.21102817 | 323.7350963 | 3.7551<br>47145 | 1.908869<br>441     | 0.0003<br>40691 | 0.0122<br>42468 | Up       |
| 5-Sep          | 580.81<br>43065 | 867.272176  | 294.356437  | 0.3394<br>04913 | -<br>1.558920<br>65 | 0.0016<br>31727 | 0.0351<br>66942 | Dow<br>n |
| 7-Sep          | 4183.8<br>92096 | 5611.971834 | 2755.812357 | 0.4910<br>59549 | -<br>1.026030<br>11 | 0.0325<br>86378 | 0.2424<br>05147 | Dow<br>n |
| SERF1<br>A     | 103.30<br>5799  | 141.7841575 | 64.82744056 | 0.4572<br>26264 | -<br>1.129019<br>82 | 0.0350<br>0527  | 0.2514<br>85321 | Dow<br>n |
| SERHL<br>2     | 24.155<br>50497 | 2.811592211 | 45.49941772 | 16.182<br>79406 | 4.016388<br>814     | 0.0001<br>62342 | 0.0072<br>13035 | Up       |
| SERPIN<br>A1   | 1773.5<br>68519 | 120.8591192 | 3426.277919 | 28.349<br>35371 | 4.825243<br>941     | 4.39E-<br>20    | 3.96E-<br>16    | Up       |
| SERPIN<br>A11  | 621.41<br>83922 | 75.33866468 | 1167.49812  | 15.496<br>66595 | 3.953885<br>953     | 8.52E-<br>10    | 5.49E-<br>07    | Up       |
| SERPIN<br>A3-1 | 115.09<br>68432 | 9.031186516 | 221.1624999 | 24.488<br>75344 | 4.614047<br>433     | 4.12E-<br>05    | 0.0026<br>42511 | Up       |
| SERPIN         | 1473.2          | 198.1928998 | 2748.213248 | 13.866          | 3.793516            | 3.28E-          | 0.0022          | Up       |

|              |                 |             |             |                 |                     |                 |                 |      |
|--------------|-----------------|-------------|-------------|-----------------|---------------------|-----------------|-----------------|------|
| A5           | 03074           |             |             | 35571           | 77                  | 05              | 01057           |      |
| SERPIN<br>B5 | 333.14<br>88553 | 145.834008  | 520.4637026 | 3.5688<br>77449 | 1.835470<br>362     | 0.0006<br>06669 | 0.0177<br>36966 | Up   |
| SERPIN<br>B8 | 374.78<br>39245 | 518.0037041 | 231.5641449 | 0.4470<br>31832 | -<br>1.161550<br>53 | 0.0246<br>75294 | 0.2059<br>77614 | Down |
| SERPIN<br>B9 | 232.76<br>68744 | 362.5801602 | 102.9535886 | 0.2839<br>4711  | -<br>1.816305<br>87 | 0.0373<br>28383 | 0.2616<br>81546 | Down |
| SERPIN<br>E1 | 9086.7<br>6971  | 17753.81191 | 419.7275114 | 0.0236<br>41543 | -<br>5.402531<br>98 | 0.0442<br>37052 | 0.2849<br>97206 | Down |
| SERPIN<br>F1 | 4570.7<br>40173 | 8388.597683 | 752.8826621 | 0.0897<br>50718 | -<br>3.477932<br>71 | 0.0001<br>99215 | 0.0083<br>18592 | Down |
| SERPIN<br>G1 | 12094.<br>62977 | 16676.74372 | 7512.51582  | 0.4504<br>78579 | -<br>1.150469<br>59 | 0.0415<br>38905 | 0.2746<br>46511 | Down |
| SERPIN<br>H1 | 11847.<br>65415 | 20379.7071  | 3315.601209 | 0.1626<br>91308 | -<br>2.619790<br>92 | 2.03E-<br>07    | 4.26E-<br>05    | Down |
| SERTM<br>1   | 490.97<br>56175 | 863.4697431 | 118.481492  | 0.1372<br>15569 | -<br>2.865483<br>91 | 0.0242<br>88057 | 0.2044<br>32346 | Down |
| SETBP1       | 656.21<br>59748 | 961.7214378 | 350.7105118 | 0.3646<br>69537 | -<br>1.455338<br>41 | 0.0412<br>81309 | 0.2741<br>80238 | Down |
| SFRP1        | 2060.1<br>09238 | 2927.171411 | 1193.047066 | 0.4075<br>76769 | -<br>1.294856<br>27 | 0.0463<br>7588  | 0.2934<br>20711 | Down |
| SFRP2        | 9880.2<br>2388  | 18742.18936 | 1018.258401 | 0.0543<br>29747 | -<br>4.202113<br>87 | 0.0020<br>63204 | 0.0407<br>00303 | Down |
| SFRP4        | 4133.0<br>30197 | 8024.361275 | 241.6991198 | 0.0301<br>20668 | -<br>5.053102<br>44 | 1.39E-<br>06    | 0.0001<br>83782 | Down |
| SFXN1        | 611.97<br>09177 | 860.3126012 | 363.6292341 | 0.4226<br>71054 | -<br>1.242392<br>78 | 0.0136<br>68957 | 0.1448<br>2909  | Down |
| SFXN3        | 1272.2<br>79498 | 2130.163005 | 414.3959914 | 0.1945<br>37221 | -<br>2.361881<br>88 | 2.85E-<br>06    | 0.0003<br>25976 | Down |
| SFXN5        | 370.24<br>8395  | 234.1306145 | 506.3661754 | 2.1627<br>50806 | 1.112867<br>447     | 0.0152<br>78108 | 0.1560<br>59903 | Up   |

|              |                 |             |             |                 |                     |                 |                 |      |
|--------------|-----------------|-------------|-------------|-----------------|---------------------|-----------------|-----------------|------|
| SGCA         | 99.816<br>42294 | 181.4487644 | 18.18408152 | 0.1002<br>16067 | -<br>3.318814<br>27 | 0.0266<br>79504 | 0.2153<br>34037 | Down |
| SGCB         | 1877.1<br>69258 | 3076.419011 | 677.9195056 | 0.2203<br>59939 | -<br>2.182066<br>13 | 0.0336<br>21184 | 0.2460<br>23638 | Down |
| SGCE         | 540.44<br>02315 | 811.6800271 | 269.200436  | 0.3316<br>58322 | -<br>1.592230<br>37 | 0.0017<br>49682 | 0.0367<br>06729 | Down |
| SGCG         | 58.493<br>14529 | 116.7987312 | 0.187559335 | 0.0016<br>05834 | -<br>9.282461<br>82 | 0.0413<br>8092  | 0.2743<br>38426 | Down |
| SGIP1        | 114.88<br>7651  | 195.8529898 | 33.92231217 | 0.1732<br>02932 | -<br>2.529464<br>74 | 0.0422<br>28569 | 0.2771<br>25457 | Down |
| SGK1         | 1460.6<br>20072 | 2091.254694 | 829.9854503 | 0.3968<br>83963 | -<br>1.333210<br>83 | 0.0385<br>05484 | 0.2644<br>08235 | Down |
| SGK2         | 16.901<br>27057 | 4.759575102 | 29.04296604 | 6.1020<br>08146 | 2.609284<br>106     | 0.0129<br>17838 | 0.1406<br>30588 | Up   |
| SGPP2        | 193.88<br>5866  | 60.16192996 | 327.609802  | 5.4454<br>66963 | 2.445055<br>769     | 0.0002<br>08695 | 0.0085<br>95107 | Up   |
| SGTB         | 88.818<br>11295 | 145.2120004 | 32.42422554 | 0.2232<br>88884 | -<br>2.163016<br>66 | 0.0047<br>94088 | 0.0721<br>73265 | Down |
| SH2D2<br>A   | 46.933<br>98221 | 24.45011098 | 69.41785344 | 2.8391<br>63123 | 1.505465<br>741     | 0.0314<br>63156 | 0.2377<br>72886 | Up   |
| SH2D3<br>A   | 94.928<br>25575 | 43.49887427 | 146.3576372 | 3.3646<br>30457 | 1.750448<br>06      | 0.0018<br>8472  | 0.0382<br>00529 | Up   |
| SH2D4<br>A   | 240.89<br>13904 | 50.01120844 | 431.7715724 | 8.6334<br>96089 | 3.109944<br>889     | 4.72E-<br>08    | 1.25E-<br>05    | Up   |
| SH3BG<br>R   | 872.32<br>54649 | 1534.742405 | 209.9085244 | 0.1367<br>71177 | -<br>2.870163<br>87 | 0.0128<br>20323 | 0.1397<br>37649 | Down |
| SH3BP1       | 552.63<br>64297 | 311.5283961 | 793.7444632 | 2.5479<br>04053 | 1.349310<br>951     | 0.0034<br>64449 | 0.0577<br>05631 | Up   |
| SH3GL<br>B2  | 3136.5<br>63297 | 1889.043392 | 4384.083203 | 2.3207<br>95394 | 1.214619<br>337     | 0.0078<br>82303 | 0.1009<br>14741 | Up   |
| SH3PX<br>D2B | 2375.7<br>59673 | 3763.564281 | 987.9550651 | 0.2625<br>05166 | -<br>1.929582<br>28 | 0.0021<br>3348  | 0.0416<br>51354 | Down |
| SH3RF2       | 114.83<br>88933 | 38.50251642 | 191.1752702 | 4.9652<br>66896 | 2.311871<br>268     | 0.0007<br>31934 | 0.0204<br>07035 | Up   |
| SH3YL        | 914.06          | 503.7501078 | 1324.383248 | 2.6290          | 1.394540            | 0.0041          | 0.0653          | Up   |

|              |                 |             |             |                 |                     |                 |                 |          |
|--------------|-----------------|-------------|-------------|-----------------|---------------------|-----------------|-----------------|----------|
| 1            | 6678            |             |             | 48069           | 52                  | 73527           | 61438           |          |
| SHANK<br>1   | 45.584<br>63264 | 78.96846004 | 12.20080525 | 0.1545<br>02256 | -<br>2.694300<br>19 | 0.0018<br>17383 | 0.0373<br>39145 | Dow<br>n |
| SHANK<br>2   | 2031.1<br>04233 | 535.263695  | 3526.944771 | 6.5891<br>7241  | 2.720097<br>276     | 0.0022<br>02794 | 0.0427<br>73087 | Up       |
| SHE          | 147.60<br>91932 | 233.3976058 | 61.82078062 | 0.2648<br>73242 | -<br>1.916625<br>99 | 0.0002<br>83777 | 0.0106<br>86944 | Dow<br>n |
| SHOX2        | 240.22<br>8265  | 432.0298813 | 48.42664873 | 0.1120<br>90971 | -<br>3.157258<br>03 | 0.0020<br>64459 | 0.0407<br>00303 | Dow<br>n |
| SHROO<br>M1  | 352.25<br>89461 | 219.1049945 | 485.4128977 | 2.2154<br>35111 | 1.147590<br>071     | 0.0162<br>35352 | 0.1614<br>25488 | Up       |
| SHROO<br>M3  | 1819.2<br>89984 | 821.3673123 | 2817.212655 | 3.4299<br>05978 | 1.778169<br>029     | 0.0001<br>1747  | 0.0056<br>65887 | Up       |
| SIDT1        | 116.05<br>0203  | 35.72569251 | 196.3747134 | 5.4967<br>36372 | 2.458575<br>288     | 1.23E-<br>05    | 0.0010<br>02191 | Up       |
| SIGLEC<br>15 | 37.866<br>86744 | 13.89519196 | 61.83854292 | 4.4503<br>55424 | 2.153920<br>56      | 0.0328<br>43456 | 0.2426<br>13887 | Up       |
| SIM1         | 15.854<br>67298 | 31.70934596 | 0           | 0               | #NAME<br>?          | 0.0094<br>8361  | 0.1142<br>02163 | Dow<br>n |
| SIM2         | 26.147<br>86389 | 50.55439251 | 1.741335278 | 0.0344<br>44787 | -<br>4.859570<br>54 | 0.0467<br>86369 | 0.2946<br>42218 | Dow<br>n |
| SIRT3        | 254.52<br>19597 | 152.2502034 | 356.793716  | 2.3434<br>69552 | 1.228646<br>051     | 0.0170<br>04229 | 0.1661<br>64291 | Up       |
| SIT1         | 90.810<br>34008 | 46.48241391 | 135.1382662 | 2.9072<br>98801 | 1.539679<br>354     | 0.0162<br>94075 | 0.1616<br>7702  | Up       |
| SIX1         | 42.692<br>38874 | 73.00216063 | 12.38261686 | 0.1696<br>19868 | -<br>2.559622<br>93 | 0.0007<br>38608 | 0.0205<br>57378 | Dow<br>n |
| SIX3         | 22.716<br>82409 | 6.002683378 | 39.4309648  | 6.5688<br>89663 | 2.715649<br>533     | 0.0036<br>19896 | 0.0593<br>09081 | Up       |
| SIX4         | 245.96<br>26588 | 139.474709  | 352.4506087 | 2.5269<br>85797 | 1.337417<br>556     | 0.0080<br>95411 | 0.1026<br>23415 | Up       |
| SKA1         | 67.670<br>33805 | 100.3591839 | 34.98149219 | 0.3485<br>6294  | -<br>1.520508<br>91 | 0.0350<br>0187  | 0.2514<br>85321 | Dow<br>n |
| SKIL         | 1081.3<br>58012 | 1512.136893 | 650.5791315 | 0.4302<br>38251 | -<br>1.216792<br>3  | 0.0242<br>29162 | 0.2042<br>38245 | Dow<br>n |
| SLAIN1       | 56.400<br>28108 | 23.62806058 | 89.17250158 | 3.7740<br>08504 | 1.916097<br>674     | 0.0143<br>94999 | 0.1504<br>46921 | Up       |

|              |                 |             |             |                 |                     |                 |                 |          |
|--------------|-----------------|-------------|-------------|-----------------|---------------------|-----------------|-----------------|----------|
| SLAIN2       | 371.32<br>03361 | 496.1811272 | 246.459545  | 0.4967<br>12856 | -<br>1.009516<br>01 | 0.0226<br>6128  | 0.1963<br>43342 | Dow<br>n |
| SLAMF<br>9   | 40.987<br>69282 | 77.93907018 | 4.036315466 | 0.0517<br>88089 | -<br>4.271235<br>88 | 6.30E-<br>06    | 0.0005<br>88511 | Dow<br>n |
| SLC12<br>A4  | 2120.3<br>8454  | 3344.336452 | 896.4326276 | 0.2680<br>44989 | -<br>1.899452<br>93 | 6.66E-<br>05    | 0.0037<br>87648 | Dow<br>n |
| SLC13<br>A2  | 250.88<br>62073 | 66.46257769 | 435.309837  | 6.5496<br>98373 | 2.711428<br>469     | 0.0164<br>05023 | 0.1625<br>09728 | Up       |
| SLC15<br>A2  | 116.52<br>80859 | 37.38193994 | 195.6742319 | 5.2344<br>58998 | 2.388040<br>437     | 0.0156<br>88146 | 0.1581<br>00954 | Up       |
| SLC16<br>A11 | 551.45<br>50667 | 273.0062695 | 829.903864  | 3.0398<br>71082 | 1.604010<br>142     | 0.0003<br>93103 | 0.0134<br>55749 | Up       |
| SLC16<br>A2  | 226.89<br>00802 | 331.1529176 | 122.6272428 | 0.3703<br>03978 | -<br>1.433218<br>05 | 0.0069<br>51954 | 0.0925<br>69328 | Dow<br>n |
| SLC16<br>A3  | 262.93<br>5461  | 428.4454687 | 97.42545338 | 0.2273<br>9289  | -<br>2.136740<br>95 | 0.0001<br>13401 | 0.0055<br>58799 | Dow<br>n |
| SLC17<br>A1  | 13.654<br>813   | 2.571454423 | 24.73817158 | 9.6203<br>03342 | 3.266082<br>385     | 0.0053<br>31488 | 0.0774<br>97754 | Up       |
| SLC17<br>A7  | 62.562<br>66985 | 16.87851346 | 108.2468262 | 6.4132<br>9146  | 2.681064<br>974     | 0.0152<br>31163 | 0.1558<br>59894 | Up       |
| SLC19<br>A1  | 105.01<br>86351 | 147.1948955 | 62.84237467 | 0.4269<br>33111 | -<br>1.227918<br>04 | 0.0477<br>666   | 0.2982<br>56038 | Dow<br>n |
| SLC19<br>A3  | 29.546<br>32547 | 9.615892437 | 49.47675851 | 5.1453<br>11143 | 2.363258<br>321     | 0.0032<br>15448 | 0.0549<br>79591 | Up       |
| SLC1A<br>1   | 406.94<br>06571 | 139.0581096 | 674.8232045 | 4.8528<br>14455 | 2.278821<br>7       | 4.92E-<br>06    | 0.0004<br>98657 | Up       |
| SLC22<br>A31 | 70.580<br>06622 | 18.47619154 | 122.6839409 | 6.6401<br>0982  | 2.731207<br>102     | 2.27E-<br>05    | 0.0016<br>4923  | Up       |
| SLC22<br>A5  | 697.32<br>31697 | 360.4475012 | 1034.198838 | 2.8692<br>07956 | 1.520652<br>536     | 0.0087<br>97842 | 0.1087<br>76064 | Up       |
| SLC23<br>A1  | 26.289<br>17848 | 10.49633113 | 42.08202584 | 4.0092<br>1287  | 2.003319<br>02      | 0.0209<br>68604 | 0.1884<br>01543 | Up       |
| SLC24<br>A3  | 522.38<br>71575 | 211.1266802 | 833.6476348 | 3.9485<br>66017 | 1.981328<br>811     | 0.0229<br>07915 | 0.1972<br>79526 | Up       |
| SLC25<br>A10 | 953.69<br>3038  | 385.2181472 | 1522.167929 | 3.9514<br>4398  | 1.982379<br>955     | 0.0007<br>57366 | 0.0207<br>31604 | Up       |
| SLC25<br>A13 | 171.25<br>07696 | 109.0080472 | 233.493492  | 2.1419<br>83992 | 1.098947<br>698     | 0.0349<br>00549 | 0.2511<br>25253 | Up       |



|              |                 |             |             |                 |                     |                 |                 |      |
|--------------|-----------------|-------------|-------------|-----------------|---------------------|-----------------|-----------------|------|
| SLC25<br>A29 | 3348.9<br>17582 | 2149.243164 | 4548.591999 | 2.1163<br>69183 | 1.081591<br>315     | 0.0253<br>89475 | 0.2087<br>51475 | Up   |
| SLC25<br>A47 | 11.278<br>23506 | 2.548227561 | 20.00824255 | 7.8518<br>27228 | 2.973028<br>428     | 0.0242<br>60411 | 0.2043<br>1072  | Up   |
| SLC25<br>A48 | 55.362<br>07385 | 1.616639948 | 109.1075077 | 67.490<br>29547 | 6.076608<br>165     | 1.65E-<br>05    | 0.0012<br>70317 | Up   |
| SLC26<br>A4  | 14.112<br>94757 | 1.882137094 | 26.34375804 | 13.996<br>72644 | 3.807017<br>544     | 0.0184<br>19394 | 0.1751<br>33548 | Up   |
| SLC27<br>A5  | 247.00<br>85641 | 104.5157706 | 389.5013577 | 3.7267<br>23303 | 1.897907<br>708     | 0.0007<br>54198 | 0.0207<br>0773  | Up   |
| SLC28<br>A3  | 6592.6<br>38962 | 3086.513265 | 10098.76466 | 3.2719<br>00618 | 1.710128<br>928     | 0.0099<br>45374 | 0.1178<br>74248 | Up   |
| SLC2A<br>10  | 161.29<br>44614 | 260.3187118 | 62.27021107 | 0.2392<br>07588 | -<br>2.063664<br>94 | 0.0002<br>49062 | 0.0098<br>52714 | Down |
| SLC2A<br>11  | 25.302<br>62956 | 10.00709536 | 40.59816377 | 4.0569<br>37835 | 2.020391<br>196     | 0.0361<br>2419  | 0.2556<br>68289 | Up   |
| SLC2A<br>13  | 46.770<br>9217  | 71.60377177 | 21.93807163 | 0.3063<br>81509 | -<br>1.706598<br>87 | 0.0193<br>95095 | 0.1802<br>84617 | Down |
| SLC2A<br>3   | 2078.6<br>77172 | 3454.757786 | 702.5965584 | 0.2033<br>70714 | -<br>2.297816<br>15 | 1.19E-<br>06    | 0.0001<br>67684 | Down |
| SLC2A<br>4   | 203.28<br>26891 | 313.263464  | 93.30191426 | 0.2978<br>38481 | -<br>1.747397<br>93 | 0.0005<br>74613 | 0.0170<br>20448 | Down |
| SLC34<br>A3  | 43.891<br>41987 | 22.18847493 | 65.59436481 | 2.9562<br>3584  | 1.563761<br>368     | 0.0227<br>93791 | 0.1968<br>54819 | Up   |
| SLC35<br>D1  | 61.780<br>42285 | 102.8409234 | 20.7199223  | 0.2014<br>7546  | -<br>2.311323<br>97 | 0.0009<br>77538 | 0.0250<br>6596  | Down |
| SLC35E<br>4  | 79.856<br>88896 | 124.7575532 | 34.95622468 | 0.2801<br>93253 | -<br>1.835505<br>88 | 0.0041<br>12284 | 0.0649<br>00685 | Down |
| SLC35<br>G2  | 23.155<br>8751  | 38.51002347 | 7.801726728 | 0.2025<br>89509 | -<br>2.303368<br>63 | 0.0101<br>49408 | 0.1195<br>85351 | Down |
| SLC37<br>A1  | 1475.5<br>54578 | 769.922956  | 2181.186199 | 2.8329<br>92811 | 1.502326<br>941     | 0.0049<br>31079 | 0.0737<br>57653 | Up   |
| SLC37<br>A2  | 274.24<br>28714 | 136.8561956 | 411.6295471 | 3.0077<br>52373 | 1.588685<br>795     | 0.0006<br>40372 | 0.0183<br>31103 | Up   |
| SLC38<br>A5  | 114.18<br>62355 | 214.0904468 | 14.28202413 | 0.0667<br>10236 | -<br>3.905948<br>05 | 0.0027<br>3404  | 0.0491<br>71841 | Down |

|              |                 |             |             |                 |                     |                 |                 |      |
|--------------|-----------------|-------------|-------------|-----------------|---------------------|-----------------|-----------------|------|
| SLC39<br>A11 | 1219.1<br>45881 | 641.057953  | 1797.23381  | 2.8035<br>43426 | 1.487251<br>417     | 0.0007<br>84265 | 0.0212<br>10438 | Up   |
| SLC39<br>A13 | 1116.9<br>97567 | 1539.695988 | 694.299146  | 0.4509<br>3262  | -<br>1.149016<br>22 | 0.0196<br>79616 | 0.1821<br>4499  | Down |
| SLC39<br>A5  | 27.154<br>48553 | 13.79972181 | 40.50924924 | 2.9355<br>12019 | 1.553612<br>164     | 0.0401<br>89795 | 0.2703<br>87671 | Up   |
| SLC3A<br>2   | 2859.0<br>9876  | 1449.038636 | 4269.158883 | 2.9462<br>00866 | 1.558855<br>794     | 0.0012<br>15876 | 0.0288<br>59466 | Up   |
| SLC41<br>A2  | 516.02<br>7189  | 905.217967  | 126.8364111 | 0.1401<br>16984 | -<br>2.835296<br>26 | 0.0043<br>21369 | 0.0669<br>12591 | Down |
| SLC44<br>A3  | 360.20<br>42115 | 50.81518839 | 669.5932347 | 13.177<br>02946 | 3.719953<br>271     | 8.08E-<br>05    | 0.0042<br>62508 | Up   |
| SLC44<br>A4  | 93.042<br>8805  | 9.4006838   | 176.6850772 | 18.794<br>91758 | 4.232270<br>684     | 0.0023<br>84081 | 0.0450<br>91696 | Up   |
| SLC46<br>A1  | 118.49<br>59308 | 62.91794572 | 174.0739159 | 2.7666<br>81491 | 1.468156<br>566     | 0.0044<br>52264 | 0.0685<br>27636 | Up   |
| SLC46<br>A2  | 103.29<br>57483 | 64.57336982 | 142.0181268 | 2.1993<br>2965  | 1.137063<br>861     | 0.0258<br>23409 | 0.2110<br>09242 | Up   |
| SLC4A<br>11  | 727.02<br>18781 | 1125.639974 | 328.4037817 | 0.2917<br>48507 | -<br>1.777202<br>82 | 0.0318<br>58593 | 0.2395<br>56964 | Down |
| SLC4A<br>4   | 575.11<br>31638 | 1032.309976 | 117.9163516 | 0.1142<br>25721 | -<br>3.130040<br>54 | 0.0091<br>84166 | 0.1114<br>89343 | Down |
| SLC6A<br>12  | 10.055<br>7358  | 2.746606828 | 17.36486478 | 6.3222<br>97245 | 2.660448<br>866     | 0.0301<br>68103 | 0.2322<br>67352 | Up   |
| SLC6A<br>17  | 448.84<br>18882 | 888.8509406 | 8.832835838 | 0.0099<br>37365 | -<br>6.652920<br>99 | 0.0071<br>0476  | 0.0936<br>59534 | Down |
| SLC6A<br>2   | 192.95<br>13825 | 376.263068  | 9.639696961 | 0.0256<br>19567 | -<br>5.286610<br>08 | 1.69E-<br>07    | 3.63E-<br>05    | Down |
| SLC7A<br>2   | 1078.1<br>99304 | 1820.998247 | 335.40036   | 0.1841<br>84889 | -<br>2.440773<br>39 | 0.0185<br>13261 | 0.1756<br>76336 | Down |
| SLC7A<br>8   | 508.07<br>88785 | 158.654616  | 857.5031411 | 5.4048<br>42055 | 2.434252<br>459     | 4.19E-<br>06    | 0.0004<br>36451 | Up   |
| SLC8A<br>2   | 36.181<br>98964 | 67.05475965 | 5.30921964  | 0.0791<br>77372 | -<br>3.658768<br>01 | 0.0332<br>01194 | 0.2442<br>56254 | Down |
| SLC9A<br>3R1 | 1218.6<br>74134 | 762.1885691 | 1675.159699 | 2.1978<br>2842  | 1.136078<br>763     | 0.0230<br>65312 | 0.1981<br>3103  | Up   |

|         |             |             |             |             |             |             |             |      |
|---------|-------------|-------------|-------------|-------------|-------------|-------------|-------------|------|
| SLC9A4  | 12.48001576 | 0           | 24.96003151 | Inf         | Inf         | 0.000673967 | 0.019088188 | Up   |
| SLC9A7  | 337.8957988 | 176.6800309 | 499.1115667 | 2.824946114 | 1.498223348 | 0.003943817 | 0.063350413 | Up   |
| SLCO1A2 | 138.0351954 | 59.27595419 | 216.7944366 | 3.657375736 | 1.870808848 | 0.012508006 | 0.137245698 | Up   |
| SLCO2A1 | 369.5883245 | 533.6710076 | 205.5056414 | 0.385079269 | -1.37677264 | 0.037638558 | 0.262350059 | Down |
| SLCO4A1 | 225.5801204 | 366.4503389 | 84.70990186 | 0.231163388 | -2.11301518 | 0.010546642 | 0.122505396 | Down |
| SLCO4C1 | 74.10438271 | 21.71033185 | 126.4984336 | 5.826646707 | 2.542665837 | 0.000513797 | 0.015843404 | Up   |
| SLIT1   | 53.69106105 | 16.73915229 | 90.64296981 | 5.415027489 | 2.436968661 | 0.032673736 | 0.242527832 | Up   |
| SLIT2   | 760.8732875 | 1257.824069 | 263.922506  | 0.209824659 | -2.25274386 | 0.00024257  | 0.009680795 | Down |
| SLIT3   | 3063.505474 | 5233.577691 | 893.4332576 | 0.17071176  | -2.55036565 | 0.00101232  | 0.025540201 | Down |
| SLITRK2 | 301.3501647 | 156.0632139 | 446.6371154 | 2.861898742 | 1.516972628 | 0.049306106 | 0.303020077 | Up   |
| SLITRK4 | 32.28159465 | 63.67204883 | 0.89114046  | 0.013995787 | -6.15886353 | 1.41E-07    | 3.22E-05    | Down |
| SLITRK5 | 30.19928113 | 58.89715312 | 1.501409151 | 0.02549205  | -5.29380881 | 0.001816831 | 0.037339145 | Down |
| SLITRK6 | 121.8717918 | 32.61004961 | 211.133534  | 6.47449288  | 2.694767197 | 9.76E-06    | 0.000830629 | Up   |
| SLMAP   | 3335.556574 | 5555.601999 | 1115.51115  | 0.200790328 | -2.31623831 | 0.045075294 | 0.288715962 | Down |
| SMAD7   | 471.4138711 | 663.6528799 | 279.1748622 | 0.420663981 | -1.2492598  | 0.017135281 | 0.167082887 | Down |
| SMAD9   | 269.9404836 | 471.5632393 | 68.31772778 | 0.144875007 | -2.78711936 | 0.016161557 | 0.16098196  | Down |
| SMARCD3 | 1439.509023 | 2177.782995 | 701.2350513 | 0.321994915 | -1.63489019 | 0.026953999 | 0.216291453 | Down |

|             |                 |             |             |                 |                     |                 |                 |      |
|-------------|-----------------|-------------|-------------|-----------------|---------------------|-----------------|-----------------|------|
| SMC1A       | 454.51<br>99374 | 619.3594798 | 289.680395  | 0.4677<br>09633 | -<br>1.096314<br>95 | 0.0219<br>52982 | 0.1926<br>11795 | Down |
| SMCO3       | 47.177<br>05437 | 19.46788827 | 74.88622046 | 3.8466<br>53495 | 1.943603<br>878     | 0.0413<br>39277 | 0.2743<br>38426 | Up   |
| SMIM1<br>4  | 2848.2<br>35914 | 3872.760018 | 1823.711809 | 0.4709<br>07518 | -<br>1.086484<br>34 | 0.0134<br>48732 | 0.1436<br>3758  | Down |
| SMKR1       | 89.337<br>21747 | 40.69964684 | 137.9747881 | 3.3900<br>7335  | 1.761316<br>489     | 0.0235<br>71348 | 0.2004<br>18389 | Up   |
| SMOC1       | 1086.5<br>04763 | 1644.983704 | 528.0258215 | 0.3209<br>91521 | -<br>1.639392<br>9  | 5.07E-<br>05    | 0.0030<br>56851 | Down |
| SMPD2       | 468.44<br>05754 | 295.9897146 | 640.8914362 | 2.1652<br>49008 | 1.114532<br>948     | 0.0173<br>90277 | 0.1685<br>67011 | Up   |
| SMPD3       | 56.900<br>08613 | 29.16194174 | 84.63823052 | 2.9023<br>52363 | 1.537222<br>682     | 0.0328<br>95875 | 0.2427<br>02942 | Up   |
| SMPDL<br>3B | 30.093<br>08236 | 50.7849403  | 9.401224419 | 0.1851<br>18351 | -<br>2.433480<br>17 | 0.0101<br>17266 | 0.1193<br>62565 | Down |
| SMTN        | 4427.7<br>35078 | 7867.896389 | 987.5737675 | 0.1255<br>19417 | -<br>2.994017<br>54 | 0.0134<br>48854 | 0.1436<br>3758  | Down |
| SNAI1       | 218.42<br>06726 | 325.8684641 | 110.9728812 | 0.3405<br>45015 | -<br>1.554082<br>58 | 0.0036<br>30748 | 0.0594<br>19902 | Down |
| SNAI2       | 1106.8<br>07022 | 1598.279048 | 615.3349967 | 0.3849<br>98475 | -<br>1.377075<br>36 | 0.0102<br>4581  | 0.1204<br>39133 | Down |
| SNAPC<br>5  | 278.99<br>28791 | 173.4272089 | 384.5585493 | 2.2174<br>06091 | 1.148873<br>006     | 0.0260<br>69604 | 0.2120<br>9125  | Up   |
| SNED1       | 318.56<br>61046 | 446.1739114 | 190.9582978 | 0.4279<br>90729 | -<br>1.224348<br>55 | 0.0172<br>5832  | 0.1675<br>58038 | Down |
| SNRK        | 580.04<br>80351 | 787.1854156 | 372.9106546 | 0.4737<br>2658  | -<br>1.077873<br>47 | 0.0118<br>94679 | 0.1328<br>59517 | Down |
| SNTB2       | 135.32<br>59881 | 202.764122  | 67.88785427 | 0.3348<br>11966 | -<br>1.578577<br>01 | 0.0051<br>17991 | 0.0756<br>12976 | Down |
| SNX24       | 272.62<br>61906 | 419.0944247 | 126.1579566 | 0.3010<br>25137 | -<br>1.732044<br>13 | 0.0482<br>4119  | 0.2997<br>66735 | Down |
| SNX5        | 1574.9          | 991.5547305 | 2158.371862 | 2.1767          | 1.122179            | 0.0262          | 0.2131          | Up   |

|            |                 |             |             |                 |                     |                 |                 |          |
|------------|-----------------|-------------|-------------|-----------------|---------------------|-----------------|-----------------|----------|
|            | 63296           |             |             | 55146           | 134                 | 93013           | 68387           |          |
| SNX7       | 355.23<br>23774 | 479.2030857 | 231.2616692 | 0.4825<br>96369 | -<br>1.051111<br>03 | 0.0203<br>87254 | 0.1852<br>72379 | Dow<br>n |
| SOCS1      | 80.422<br>75698 | 112.5931716 | 48.25234233 | 0.4285<br>54784 | -<br>1.222448<br>45 | 0.0463<br>28971 | 0.2933<br>40927 | Dow<br>n |
| SOCS3      | 518.86<br>30355 | 803.0093203 | 234.7167508 | 0.2922<br>96422 | -<br>1.774495<br>93 | 0.0334<br>11598 | 0.2453<br>03316 | Dow<br>n |
| SOCS4      | 162.81<br>71163 | 230.8270303 | 94.8072022  | 0.4107<br>28337 | -<br>1.283743<br>61 | 0.0203<br>04668 | 0.1849<br>30623 | Dow<br>n |
| SOD2       | 3969.7<br>50244 | 2162.024316 | 5777.476173 | 2.6722<br>53097 | 1.418056<br>656     | 0.0034<br>82156 | 0.0579<br>47058 | Up       |
| SOD3       | 730.19<br>15855 | 1137.219319 | 323.1638521 | 0.2841<br>70209 | -<br>1.815172<br>78 | 0.0024<br>63228 | 0.0459<br>07943 | Dow<br>n |
| SOGA1      | 1300.8<br>77407 | 1742.549725 | 859.2050891 | 0.4930<br>73499 | -<br>1.020125<br>38 | 0.0469<br>91906 | 0.2955<br>67291 | Dow<br>n |
| SOGA3      | 29.792<br>75251 | 58.36019154 | 1.225313489 | 0.0209<br>95707 | -<br>5.573761<br>81 | 0.0055<br>87046 | 0.0795<br>62089 | Dow<br>n |
| SORBS<br>1 | 5119.7<br>18851 | 8510.63306  | 1728.804641 | 0.2031<br>3467  | -<br>2.299491<br>6  | 0.0275<br>1564  | 0.2189<br>47782 | Dow<br>n |
| SORL1      | 1772.8<br>80039 | 899.1779373 | 2646.582141 | 2.9433<br>35275 | 1.557451<br>889     | 0.0063<br>23476 | 0.0871<br>42238 | Up       |
| SORT1      | 1413.1<br>20995 | 760.3863826 | 2065.855608 | 2.7168<br>49821 | 1.441934<br>82      | 0.0011<br>18853 | 0.0273<br>85332 | Up       |
| SOWA<br>HA | 67.842<br>18913 | 35.03148038 | 100.6528979 | 2.8732<br>12801 | 1.522664<br>848     | 0.0227<br>96702 | 0.1968<br>54819 | Up       |
| SOX10      | 4658.8<br>49516 | 2082.067625 | 7235.631408 | 3.4752<br>14408 | 1.797101<br>989     | 0.0002<br>44739 | 0.0097<br>3701  | Up       |
| SOX15      | 87.746<br>72742 | 53.1213638  | 122.372091  | 2.3036<br>3233  | 1.203910<br>474     | 0.0291<br>36473 | 0.2274<br>30909 | Up       |
| SOX18      | 587.57<br>32126 | 830.4122997 | 344.7341255 | 0.4151<br>36102 | -<br>1.268343<br>69 | 0.0069<br>28629 | 0.0925<br>69328 | Dow<br>n |
| SOX5       | 58.654<br>02926 | 98.37945024 | 18.92860829 | 0.1924<br>04087 | -<br>2.377788<br>65 | 0.0262<br>27442 | 0.2129<br>23868 | Dow<br>n |
| SPARC      | 15872           | 290044.1363 | 27399.30843 | 0.0944          | -                   | 0.0011          | 0.0273          | Dow      |

|            |             |             |             |             |             |             |             |      |
|------------|-------------|-------------|-------------|-------------|-------------|-------------|-------------|------|
|            | 1.7224      |             |             | 65997       | 3.40406107  | 14675       | 62813       | n    |
| SPATA18    | 32.71849308 | 63.37289901 | 2.064087157 | 0.032570502 | -4.94029022 | 0.043569844 | 0.282458939 | Down |
| SPATA20    | 633.1837153 | 948.4941901 | 317.8732405 | 0.335134621 | -1.57718737 | 0.009533888 | 0.114578149 | Down |
| SPC24      | 79.19154157 | 118.4256099 | 39.95747327 | 0.337405679 | -1.56744384 | 0.022630497 | 0.196223216 | Down |
| SPDEF      | 289.5504689 | 31.86768147 | 547.2332563 | 17.17204488 | 4.101989943 | 0.000170481 | 0.007446284 | Up   |
| SPDYC      | 7.177330503 | 0.619636744 | 13.73502426 | 22.16625206 | 4.47029295  | 0.029440168 | 0.229018434 | Up   |
| SPEG       | 1986.297017 | 2928.855434 | 1043.738601 | 0.356363987 | -1.48857654 | 0.045579379 | 0.290122235 | Down |
| SPHKA<br>P | 64.40483173 | 19.03828187 | 109.7713816 | 5.76582395  | 2.527526787 | 0.000327461 | 0.011885454 | Up   |
| SPINK4     | 5.643859903 | 0           | 11.28771981 | Inf         | Inf         | 0.013644501 | 0.144784205 | Up   |
| SPINK6     | 31.51558779 | 4.3506824   | 58.68049318 | 13.48765269 | 3.753567387 | 0.013872976 | 0.146176761 | Up   |
| SPINT1     | 1650.820898 | 342.1868914 | 2959.454905 | 8.648650719 | 3.112475075 | 3.70E-08    | 1.08E-05    | Up   |
| SPINT2     | 8238.91668  | 2560.204132 | 13917.62923 | 5.436140445 | 2.442582729 | 3.44E-07    | 6.46E-05    | Up   |
| SPIRE2     | 147.6076504 | 81.95093966 | 213.2643611 | 2.602341865 | 1.379810499 | 0.007597023 | 0.098238498 | Up   |
| SPN        | 301.475344  | 175.5731284 | 427.3775596 | 2.434185479 | 1.283439102 | 0.008498163 | 0.105942195 | Up   |
| SPON1      | 4476.506964 | 8697.858986 | 255.1549411 | 0.029335373 | -5.09121483 | 0.001234484 | 0.029224233 | Down |
| SPON2      | 1295.776846 | 2018.586109 | 572.967583  | 0.283845995 | -1.81681971 | 0.000228865 | 0.009256733 | Down |
| SPP1       | 31025.71246 | 1686.740292 | 60364.68462 | 35.78777652 | 5.161395007 | 0.024490149 | 0.205191733 | Up   |
| SPP2       | 72.70130717 | 137.467564  | 7.935050336 | 0.057723074 | -4.11470806 | 1.43E-07    | 3.22E-05    | Down |
| SPRY3      | 14.989      | 24.42944682 | 5.549145767 | 0.2271      | -           | 0.0458      | 0.2907      | Down |

|            |                 |             |             |                 |                     |                 |                 |          |
|------------|-----------------|-------------|-------------|-----------------|---------------------|-----------------|-----------------|----------|
|            | 29629           |             |             | 49874           | 2.138283<br>59      | 28293           | 83181           | n        |
| SPSB1      | 1132.6<br>3394  | 1757.758876 | 507.5090042 | 0.2887<br>25041 | -<br>1.792231<br>86 | 0.0233<br>88791 | 0.1994<br>84824 | Dow<br>n |
| SPSB2      | 212.24<br>60481 | 116.9966867 | 307.4954095 | 2.6282<br>40321 | 1.394097<br>199     | 0.0132<br>49421 | 0.1423<br>50391 | Up       |
| SPSB4      | 63.869<br>06826 | 105.5068375 | 22.23129902 | 0.2107<br>09557 | -<br>2.246672<br>34 | 0.0357<br>45552 | 0.2539<br>63773 | Dow<br>n |
| SPTSSB     | 11.757<br>02016 | 1.041324429 | 22.47271588 | 21.580<br>89761 | 4.431682<br>967     | 0.0032<br>93309 | 0.0555<br>94325 | Up       |
| SRCIN1     | 161.29<br>5715  | 48.56081024 | 274.0306197 | 5.6430<br>40516 | 2.496472<br>708     | 0.0268<br>74744 | 0.2158<br>47506 | Up       |
| SRD5A<br>1 | 835.22<br>5767  | 419.1075529 | 1251.343981 | 2.9857<br>34742 | 1.578085<br>999     | 0.0458<br>03714 | 0.2907<br>83181 | Up       |
| SRF        | 935.22<br>71803 | 1261.216881 | 609.2374795 | 0.4830<br>55285 | -<br>1.049739<br>78 | 0.0270<br>647   | 0.2168<br>90327 | Dow<br>n |
| SRL        | 238.26<br>33164 | 420.8366766 | 55.68995619 | 0.1323<br>31518 | -<br>2.917771<br>38 | 0.0003<br>23767 | 0.0117<br>98842 | Dow<br>n |
| SRPK2      | 884.53<br>28212 | 1199.281169 | 569.7844733 | 0.4751<br>04995 | -<br>1.073681<br>72 | 0.0302<br>58768 | 0.2326<br>6748  | Dow<br>n |
| SRPK3      | 49.394<br>27176 | 86.94240271 | 11.84614082 | 0.1362<br>52743 | -<br>2.875642<br>82 | 0.0136<br>38767 | 0.1447<br>84205 | Dow<br>n |
| SRPX       | 666.72<br>67091 | 1081.052959 | 252.4004592 | 0.2334<br>76498 | -<br>2.098650<br>76 | 1.17E-<br>05    | 0.0009<br>62245 | Dow<br>n |
| SRPX2      | 306.32<br>54503 | 542.8441564 | 69.80674416 | 0.1285<br>94447 | -<br>2.959099<br>75 | 2.08E-<br>08    | 6.84E-<br>06    | Dow<br>n |
| SSC5D      | 821.29<br>75332 | 1388.554638 | 254.0404282 | 0.1829<br>53138 | -<br>2.450453<br>93 | 0.0007<br>40745 | 0.0205<br>57378 | Dow<br>n |
| SSPN       | 142.23<br>50322 | 240.1526266 | 44.31743793 | 0.1845<br>38635 | -<br>2.438005<br>2  | 0.0073<br>68279 | 0.0959<br>6851  | Dow<br>n |
| SSPO       | 24.936<br>4222  | 9.306074064 | 40.56677034 | 4.3591<br>71231 | 2.124053<br>875     | 0.0247<br>56545 | 0.2063<br>44811 | Up       |
| SSTR1      | 37.579<br>90192 | 55.757573   | 19.40223085 | 0.3479<br>7481  | -<br>1.522945       | 0.0442<br>73192 | 0.2851<br>2821  | Dow<br>n |

|                |                 |             |             |                 |                     |                 |                 |      |
|----------------|-----------------|-------------|-------------|-----------------|---------------------|-----------------|-----------------|------|
|                |                 |             |             |                 | 22                  |                 |                 |      |
| ST14           | 1712.2<br>15198 | 551.1628964 | 2873.2675   | 5.2131<br>00371 | 2.382141<br>637     | 1.86E-<br>06    | 0.0002<br>32886 | Up   |
| ST18           | 26.544<br>68932 | 7.134782755 | 45.95459589 | 6.4409<br>24338 | 2.687267<br>744     | 0.0016<br>68005 | 0.0356<br>92935 | Up   |
| ST3GA<br>L3    | 444.05<br>27178 | 670.2312904 | 217.8741452 | 0.3250<br>73073 | -<br>1.621164<br>04 | 0.0008<br>12665 | 0.0217<br>95968 | Down |
| ST6GA<br>LNAC3 | 379.50<br>17393 | 44.5544839  | 714.4489948 | 16.035<br>40053 | 4.003188<br>484     | 0.0157<br>35453 | 0.1582<br>8958  | Up   |
| ST8SIA<br>5    | 33.185<br>74501 | 52.41460583 | 13.9568842  | 0.2662<br>7853  | -<br>1.908991<br>99 | 0.0215<br>27031 | 0.1905<br>42748 | Down |
| STAB1          | 3309.8<br>26131 | 5419.853229 | 1199.799032 | 0.2213<br>7113  | -<br>2.175461<br>01 | 0.0006<br>52414 | 0.0185<br>92261 | Down |
| STAC           | 380.18<br>18975 | 509.3299305 | 251.0338644 | 0.4928<br>70828 | -<br>1.020718<br>5  | 0.0293<br>12735 | 0.2284<br>11417 | Down |
| STAP2          | 735.58<br>89339 | 215.0954015 | 1256.082466 | 5.8396<br>52812 | 2.545882<br>598     | 6.74E-<br>07    | 0.0001<br>11594 | Up   |
| STAR           | 8.1874<br>55957 | 1.041324429 | 15.33358748 | 14.725<br>08188 | 3.880203<br>752     | 0.0227<br>60262 | 0.1968<br>22799 | Up   |
| STARD<br>10    | 298.80<br>77046 | 118.9518223 | 478.6635868 | 4.0240<br>12221 | 2.008634<br>687     | 0.0001<br>81312 | 0.0077<br>27022 | Up   |
| STARD<br>9     | 1832.6<br>55791 | 2608.155562 | 1057.15602  | 0.4053<br>27058 | -<br>1.302841<br>61 | 0.0057<br>28267 | 0.0812<br>36009 | Down |
| STC1           | 229.92<br>67583 | 328.0302225 | 131.8232942 | 0.4018<br>63259 | -<br>1.315223<br>41 | 0.0205<br>64631 | 0.1865<br>74402 | Down |
| STC2           | 142.18<br>34783 | 27.79015332 | 256.5768032 | 9.2326<br>51591 | 3.206745<br>045     | 0.0098<br>62784 | 0.1171<br>26237 | Up   |
| STEAP<br>1     | 108.00<br>89854 | 190.2929954 | 25.72497537 | 0.1351<br>86139 | -<br>2.886980<br>86 | 2.21E-<br>06    | 0.0002<br>64211 | Down |
| STK31          | 69.131<br>25926 | 31.55826229 | 106.7042562 | 3.3811<br>82881 | 1.757528<br>051     | 0.0069<br>58479 | 0.0925<br>69328 | Up   |
| STK32<br>A     | 10.154<br>42765 | 18.47088507 | 1.837970233 | 0.0995<br>06343 | -<br>3.329067<br>69 | 0.0075<br>40621 | 0.0977<br>89543 | Down |
| STK38          | 2342.7<br>18725 | 3214.695666 | 1470.741783 | 0.4575<br>0576  | -<br>1.128138<br>19 | 0.0157<br>42087 | 0.1582<br>8958  | Down |



|             |                 |             |             |                 |                     |                 |                 |      |
|-------------|-----------------|-------------|-------------|-----------------|---------------------|-----------------|-----------------|------|
| STOM        | 2415.3<br>14151 | 3302.640592 | 1527.98771  | 0.4626<br>56371 | -<br>1.111987<br>04 | 0.0104<br>17012 | 0.1216<br>96857 | Down |
| STX10       | 584.04<br>21126 | 352.0337291 | 816.050496  | 2.3181<br>03149 | 1.212944<br>764     | 0.0184<br>63414 | 0.1753<br>8785  | Up   |
| STX19       | 200.71<br>17657 | 50.54433523 | 350.8791963 | 6.9420<br>08331 | 2.795353<br>097     | 0.0026<br>00452 | 0.0473<br>21709 | Up   |
| STX2        | 581.24<br>28727 | 833.8156508 | 328.6700946 | 0.3941<br>75972 | -<br>1.343088<br>26 | 0.0055<br>49592 | 0.0792<br>10362 | Down |
| STXBP<br>2  | 688.72<br>24607 | 363.4081483 | 1014.036773 | 2.7903<br>5233  | 1.480447<br>298     | 0.0042<br>02071 | 0.0655<br>15258 | Up   |
| SUCNR<br>1  | 60.651<br>25971 | 103.7644608 | 17.53805864 | 0.1690<br>17971 | -<br>2.564751<br>44 | 0.0018<br>72195 | 0.0380<br>75    | Down |
| SULF1       | 1271.7<br>6485  | 2447.728493 | 95.80120731 | 0.0391<br>38821 | -<br>4.675255<br>89 | 2.18E-<br>05    | 0.0016<br>05363 | Down |
| SULF2       | 4435.4<br>05031 | 2067.328274 | 6803.481788 | 3.2909<br>53775 | 1.718505<br>762     | 0.0005<br>25197 | 0.0160<br>30518 | Up   |
| SULT1<br>B1 | 124.28<br>58901 | 175.8493005 | 72.72247972 | 0.4135<br>50009 | -<br>1.273866<br>3  | 0.0146<br>431   | 0.1519<br>83243 | Down |
| SULT1<br>C4 | 282.31<br>64538 | 84.34165505 | 480.2912525 | 5.6945<br>91269 | 2.509592<br>296     | 0.0004<br>50325 | 0.0145<br>51557 | Up   |
| SULT2<br>B1 | 29.526<br>0014  | 3.30296048  | 55.74904233 | 16.878<br>50723 | 4.077115<br>409     | 0.0004<br>11176 | 0.0137<br>86634 | Up   |
| SURF1       | 898.30<br>26191 | 551.5521508 | 1245.053088 | 2.2573<br>62401 | 1.174638<br>05      | 0.0212<br>63464 | 0.1893<br>01998 | Up   |
| SUSD3       | 154.40<br>87848 | 75.61155732 | 233.2060123 | 3.0842<br>64107 | 1.624926<br>309     | 0.0017<br>08038 | 0.0363<br>3407  | Up   |
| SVEP1       | 5572.7<br>73075 | 10298.71097 | 846.8351745 | 0.0822<br>27298 | -<br>3.604238<br>77 | 0.0319<br>9387  | 0.2400<br>73803 | Down |
| SVOP        | 24.942<br>08212 | 47.67678591 | 2.207378329 | 0.0462<br>98807 | -<br>4.432881<br>16 | 0.0280<br>09605 | 0.2213<br>16369 | Down |
| SYBU        | 206.23<br>00242 | 108.5708207 | 303.8892276 | 2.7989<br>95398 | 1.484909<br>115     | 0.0024<br>01572 | 0.0452<br>80316 | Up   |
| SYDE1       | 628.93<br>68264 | 950.116298  | 307.7573549 | 0.3239<br>15457 | -<br>1.626310<br>78 | 0.0009<br>81786 | 0.0250<br>6596  | Down |
| SYN1        | 42.229<br>62364 | 69.33512696 | 15.12412032 | 0.2181<br>30708 | -<br>2.196735       | 0.0399<br>59012 | 0.2699<br>70269 | Down |

|             |                 |             |             |                 |                     |                 |                 |          |
|-------------|-----------------|-------------|-------------|-----------------|---------------------|-----------------|-----------------|----------|
|             |                 |             |             |                 | 21                  |                 |                 |          |
| SYNC        | 1547.8<br>55857 | 2947.823255 | 147.8884594 | 0.0501<br>687   | -<br>4.317068<br>65 | 0.0118<br>37868 | 0.1326<br>35594 | Dow<br>n |
| SYNE4       | 198.59<br>17939 | 73.03603144 | 324.1475563 | 4.4381<br>86877 | 2.149970<br>416     | 0.0001<br>81621 | 0.0077<br>27022 | Up       |
| SYNGR<br>1  | 643.75<br>3554  | 240.48639   | 1047.020718 | 4.3537<br>62881 | 2.122262<br>836     | 1.94E-<br>05    | 0.0014<br>54351 | Up       |
| SYNGR<br>2  | 1544.0<br>77604 | 845.0559105 | 2243.099297 | 2.6543<br>7975  | 1.408374<br>786     | 0.0037<br>64898 | 0.0608<br>07396 | Up       |
| SYNM        | 8535.6<br>35145 | 14722.79111 | 2348.479184 | 0.1595<br>13177 | -<br>2.648252<br>49 | 0.0344<br>67688 | 0.2493<br>4421  | Dow<br>n |
| SYNPO<br>2  | 4860.4<br>32957 | 9124.719054 | 596.1468605 | 0.0653<br>33174 | -<br>3.936040<br>45 | 0.0061<br>39327 | 0.0852<br>55825 | Dow<br>n |
| SYT1        | 1263.3<br>37097 | 146.1164522 | 2380.557741 | 16.292<br>19507 | 4.026109<br>088     | 0.0033<br>62608 | 0.0565<br>31304 | Up       |
| SYT11       | 476.62<br>56356 | 784.8214157 | 168.4298555 | 0.2146<br>09148 | -<br>2.220216<br>52 | 0.0174<br>55511 | 0.1689<br>27015 | Dow<br>n |
| SYT9        | 72.736<br>42578 | 137.7253606 | 7.747491    | 0.0562<br>53191 | -<br>4.151921<br>26 | 9.21E-<br>06    | 0.0007<br>97644 | Dow<br>n |
| SYTL1       | 368.47<br>72239 | 121.720565  | 615.2338828 | 5.0544<br>77711 | 2.337562<br>023     | 5.19E-<br>06    | 0.0005<br>11761 | Up       |
| TACC1       | 3646.9<br>64429 | 5367.815013 | 1926.113844 | 0.3588<br>2642  | -<br>1.478641<br>98 | 0.0014<br>08417 | 0.0318<br>12389 | Dow<br>n |
| TACR2       | 46.102<br>9114  | 25.44754439 | 66.75827842 | 2.6233<br>68188 | 1.391420<br>303     | 0.0320<br>83657 | 0.2404<br>47481 | Up       |
| TACST<br>D2 | 395.46<br>8877  | 98.81276774 | 692.1249862 | 7.0044<br>08459 | 2.808263<br>216     | 2.70E-<br>05    | 0.0018<br>82216 | Up       |
| TAGLN       | 47587.<br>52443 | 85211.882   | 9963.166857 | 0.1169<br>22272 | -<br>3.096378<br>32 | 0.0180<br>85758 | 0.1727<br>683   | Dow<br>n |
| TAL1        | 491.24<br>6047  | 735.1651852 | 247.3269087 | 0.3364<br>23587 | -<br>1.571649<br>24 | 0.0007<br>56776 | 0.0207<br>31604 | Dow<br>n |
| TAP         | 6.1063<br>18019 | 0.354139598 | 11.85849644 | 33.485<br>37276 | 5.065459<br>123     | 0.0357<br>86648 | 0.2540<br>55628 | Up       |
| TARP        | 51.817<br>23212 | 20.74996176 | 82.88450247 | 3.9944<br>41215 | 1.997993<br>698     | 0.0035<br>54683 | 0.0586<br>48091 | Up       |
| TARSL       | 120.39          | 43.78095165 | 197.0187264 | 4.5001          | 2.169957            | 0.0001          | 0.0073          | Up       |

|             |                 |             |             |                 |                     |                 |                 |      |
|-------------|-----------------|-------------|-------------|-----------------|---------------------|-----------------|-----------------|------|
| 2           | 9839            |             |             | 01506           | 544                 | 66398           | 21106           |      |
| TAT         | 145.66<br>29783 | 13.68595061 | 277.640006  | 20.286<br>49773 | 4.342447<br>914     | 0.0069<br>5756  | 0.0925<br>69328 | Up   |
| TBC1D<br>14 | 2986.3<br>26494 | 1977.129926 | 3995.523063 | 2.0208<br>70257 | 1.014976<br>702     | 0.0171<br>48021 | 0.1671<br>16779 | Up   |
| TBC1D<br>2B | 1091.6<br>0136  | 1472.756897 | 710.4458243 | 0.4823<br>91782 | -<br>1.051722<br>76 | 0.0300<br>90006 | 0.2317<br>64993 | Down |
| TBC1D<br>4  | 962.43<br>15589 | 1486.701542 | 438.161576  | 0.2947<br>20604 | -<br>1.762580<br>17 | 0.0002<br>77511 | 0.0105<br>61225 | Down |
| TBC1D<br>8B | 491.81<br>79468 | 745.1691868 | 238.4667068 | 0.3200<br>16865 | -<br>1.643780<br>16 | 0.0037<br>99822 | 0.0612<br>55568 | Down |
| TBX1        | 52.222<br>75374 | 93.80993648 | 10.635571   | 0.1133<br>73608 | -<br>3.140843<br>25 | 5.35E-<br>06    | 0.0005<br>21768 | Down |
| TBX15       | 451.12<br>30808 | 799.7670556 | 102.4791059 | 0.1281<br>36193 | -<br>2.964250<br>06 | 0.0005<br>73482 | 0.0170<br>20448 | Down |
| TBX18       | 121.53<br>92354 | 226.0107122 | 17.0677586  | 0.0755<br>17476 | -<br>3.727045<br>64 | 0.0060<br>40371 | 0.0844<br>01429 | Down |
| TBX2        | 252.17<br>46655 | 373.0745274 | 131.2748036 | 0.3518<br>72867 | -<br>1.506873<br>82 | 0.0081<br>43289 | 0.1026<br>96151 | Down |
| TBX20       | 15.325<br>40207 | 29.71300746 | 0.937796677 | 0.0315<br>61823 | -<br>4.985675<br>66 | 0.0037<br>02847 | 0.0600<br>68039 | Down |
| TBX21       | 61.547<br>74754 | 34.13014692 | 88.96534816 | 2.6066<br>5002  | 1.382196<br>894     | 0.0264<br>38081 | 0.2139<br>59865 | Up   |
| TBXA2<br>R  | 146.63<br>74601 | 217.6938477 | 75.58107239 | 0.3471<br>89749 | -<br>1.526203<br>74 | 0.0044<br>75575 | 0.0688<br>24856 | Down |
| TCF4        | 3031.3<br>09271 | 4173.180966 | 1889.437577 | 0.4527<br>57164 | -<br>1.143190<br>63 | 0.0120<br>06028 | 0.1333<br>95784 | Down |
| TCIRG1      | 1510.5<br>13509 | 898.8400914 | 2122.186927 | 2.3610<br>28337 | 1.239415<br>357     | 0.0379<br>065   | 0.2626<br>37007 | Up   |
| TDRKH       | 64.185<br>57118 | 22.41518793 | 105.9559544 | 4.7269<br>71497 | 2.240916<br>165     | 0.0017<br>86946 | 0.0369<br>66425 | Up   |
| TDRP        | 336.43<br>28427 | 185.0095478 | 487.8561376 | 2.6369<br>24113 | 1.398856<br>053     | 0.0087<br>49591 | 0.1084<br>0239  | Up   |
| TEAD4       | 127.20          | 196.6070309 | 57.80831623 | 0.2940          | -                   | 0.0108          | 0.1243          | Down |

|             |                 |             |             |                 |                     |                 |                 |      |
|-------------|-----------------|-------------|-------------|-----------------|---------------------|-----------------|-----------------|------|
|             | 76736           |             |             | 2975            | 1.76596596          | 11449           | 66846           | n    |
| TEKT4       | 5.4369<br>14299 | 0.642863606 | 10.23096499 | 15.914<br>67444 | 3.992285<br>739     | 0.0444<br>92646 | 0.2863<br>02849 | Up   |
| TENM4       | 227.94<br>48423 | 326.1203319 | 129.7693527 | 0.3979<br>18621 | -<br>1.329454<br>68 | 0.0415<br>75292 | 0.2747<br>1674  | Down |
| TERT        | 61.576<br>38156 | 15.43019822 | 107.7225649 | 6.9812<br>81988 | 2.803491<br>986     | 0.0009<br>12666 | 0.0237<br>86942 | Up   |
| TEX101      | 11.661<br>1664  | 0.309818372 | 23.01251444 | 74.277<br>4364  | 6.214852<br>118     | 0.0002<br>64689 | 0.0101<br>80638 | Up   |
| TEX26       | 39.523<br>86531 | 79.04773062 | 0           | 0               | #NAME<br>?          | 5.03E-<br>08    | 1.32E-<br>05    | Down |
| TF          | 90.170<br>77084 | 170.4823728 | 9.859168843 | 0.0578<br>31016 | -<br>4.112012<br>74 | 1.40E-<br>08    | 5.24E-<br>06    | Down |
| TFAP2<br>A  | 1315.9<br>87227 | 502.4597307 | 2129.514723 | 4.2381<br>79883 | 2.083444<br>822     | 5.39E-<br>05    | 0.0031<br>99928 | Up   |
| TFAP2B      | 299.57<br>50284 | 39.05209192 | 560.0979649 | 14.342<br>32937 | 3.842207<br>449     | 7.07E-<br>09    | 2.97E-<br>06    | Up   |
| TFAP4       | 136.69<br>06756 | 66.33257591 | 207.0487754 | 3.1213<br>73963 | 1.642181<br>213     | 0.0017<br>58114 | 0.0367<br>06729 | Up   |
| TFPI        | 134.00<br>43024 | 229.3812158 | 38.62738904 | 0.1683<br>98223 | -<br>2.570051<br>18 | 2.28E-<br>05    | 0.0016<br>4923  | Down |
| TFPI2       | 2640.3<br>89324 | 4178.751368 | 1102.027281 | 0.2637<br>21668 | -<br>1.922911<br>98 | 0.0422<br>31714 | 0.2771<br>25457 | Down |
| TFRC        | 217.69<br>2427  | 298.1795191 | 137.2053349 | 0.4601<br>4339  | -<br>1.119844<br>59 | 0.0379<br>59541 | 0.2626<br>37007 | Down |
| TGFA        | 410.31<br>33624 | 121.4930782 | 699.1336466 | 5.7545<br>14223 | 2.524694<br>146     | 0.0119<br>47695 | 0.1331<br>56085 | Up   |
| TGFBII<br>1 | 2440.8<br>92427 | 3885.067461 | 996.7173929 | 0.2565<br>50859 | -<br>1.962683<br>24 | 0.0025<br>81475 | 0.0472<br>76381 | Down |
| TGFB3       | 1277.2<br>33275 | 2249.198965 | 305.2675846 | 0.1357<br>22801 | -<br>2.881264<br>98 | 0.0420<br>19277 | 0.2767<br>38132 | Down |
| TGM7        | 21.637<br>87601 | 3.876143501 | 39.39960852 | 10.164<br>64135 | 3.345487<br>407     | 0.0273<br>23719 | 0.2182<br>90946 | Up   |
| THBD        | 1942.6<br>46127 | 3596.995978 | 288.2962752 | 0.0801<br>49179 | -<br>3.641168<br>44 | 9.45E-<br>05    | 0.0048<br>27061 | Down |

|            |                 |             |             |                 |                     |                 |                 |          |
|------------|-----------------|-------------|-------------|-----------------|---------------------|-----------------|-----------------|----------|
| THBS2      | 2568.2<br>45675 | 4939.451562 | 197.0397885 | 0.0398<br>91026 | -<br>4.647791<br>98 | 3.72E-<br>13    | 4.79E-<br>10    | Dow<br>n |
| THBS3      | 1784.1<br>58147 | 3412.001132 | 156.3151614 | 0.0458<br>13338 | -<br>4.448088<br>51 | 1.12E-<br>06    | 0.0001<br>60114 | Dow<br>n |
| THEM6      | 62.451<br>51032 | 28.77566463 | 96.12735601 | 3.3405<br>78133 | 1.740097<br>802     | 0.0106<br>09251 | 0.1228<br>32337 | Up       |
| THPO       | 143.87<br>4479  | 243.60949   | 44.13946796 | 0.1811<br>89444 | -<br>2.464429<br>19 | 0.0241<br>07748 | 0.2035<br>95346 | Dow<br>n |
| THRSP      | 168.05<br>1809  | 305.063297  | 31.04032094 | 0.1017<br>50428 | -<br>3.296893<br>24 | 0.0228<br>47577 | 0.1971<br>40861 | Dow<br>n |
| THSD1      | 455.29<br>3655  | 650.8203747 | 259.7669352 | 0.3991<br>37681 | -<br>1.325041<br>61 | 0.0009<br>20219 | 0.0238<br>84644 | Dow<br>n |
| THSD4      | 68.931<br>57202 | 123.72628   | 14.13686402 | 0.1142<br>59186 | -<br>3.129617<br>94 | 0.0076<br>84642 | 0.0990<br>87383 | Dow<br>n |
| THSD7<br>A | 51.787<br>36002 | 72.50487462 | 31.06984543 | 0.4285<br>2078  | -<br>1.222562<br>93 | 0.0493<br>03583 | 0.3030<br>20077 | Dow<br>n |
| THY1       | 9913.2<br>68984 | 15707.04684 | 4119.491125 | 0.2622<br>70251 | -<br>1.930873<br>92 | 3.78E-<br>05    | 0.0024<br>89362 | Dow<br>n |
| TIE1       | 1313.0<br>16748 | 1814.491862 | 811.5416334 | 0.4472<br>55593 | -<br>1.160828<br>57 | 0.0096<br>12028 | 0.1153<br>301   | Dow<br>n |
| TIMD4      | 158.45<br>35077 | 94.52092238 | 222.3860931 | 2.3527<br>71085 | 1.234360<br>959     | 0.0319<br>13963 | 0.2396<br>91518 | Up       |
| TIMP1      | 5168.4<br>89632 | 9198.580349 | 1138.398915 | 0.1237<br>5811  | -<br>3.014405<br>03 | 1.45E-<br>07    | 3.23E-<br>05    | Dow<br>n |
| TIMP2      | 4620.7<br>98014 | 8488.462738 | 753.1332905 | 0.0887<br>24344 | -<br>3.494526<br>18 | 1.24E-<br>06    | 0.0001<br>70906 | Dow<br>n |
| TJP3       | 1556.5<br>09852 | 691.4355824 | 2421.584122 | 3.5022<br>55573 | 1.808284<br>367     | 0.0010<br>65675 | 0.0265<br>15472 | Up       |
| TLL1       | 184.74<br>90853 | 291.7278233 | 77.77034737 | 0.2665<br>85293 | -<br>1.907330<br>9  | 0.0001<br>79848 | 0.0077<br>09084 | Dow<br>n |
| TLL2       | 111.30<br>55141 | 216.7914974 | 5.819530855 | 0.0268<br>43907 | -<br>5.219261       | 0.0419<br>04018 | 0.2762<br>02063 | Dow<br>n |

|          |             |             |             |             |             |             |             |      |
|----------|-------------|-------------|-------------|-------------|-------------|-------------|-------------|------|
|          |             |             |             |             | 51          |             |             |      |
| TLN1     | 15732.85308 | 21699.26049 | 9766.445662 | 0.450081959 | -1.15174036 | 0.013547169 | 0.144345765 | Down |
| TLR6     | 311.534545  | 201.7063488 | 421.3627412 | 2.08899097  | 1.062806256 | 0.048795227 | 0.301857717 | Up   |
| TLR7     | 144.064689  | 85.34401427 | 202.7853637 | 2.376093572 | 1.248591651 | 0.027783297 | 0.220300173 | Up   |
| TLR9     | 31.46208578 | 14.48520435 | 48.4389672  | 3.344030641 | 1.741588067 | 0.031744391 | 0.239096895 | Up   |
| TM4SF5   | 46.08461166 | 15.81652487 | 76.35269844 | 4.827400396 | 2.271246492 | 0.004509024 | 0.06922184  | Up   |
| TM6SF1   | 346.1001827 | 497.737452  | 194.4629134 | 0.390693753 | -1.35588991 | 0.032541569 | 0.242405147 | Down |
| TMC4     | 1119.302549 | 451.6286845 | 1786.976413 | 3.956738077 | 1.984311567 | 2.31E-05    | 0.001668658 | Up   |
| TMC8     | 229.4175028 | 139.9874208 | 318.8475849 | 2.277687404 | 1.187569761 | 0.020998287 | 0.188401543 | Up   |
| TMCC3    | 349.6974856 | 130.6947529 | 568.7002182 | 4.351362281 | 2.121467136 | 7.49E-05    | 0.004058408 | Up   |
| TMED3    | 1438.80896  | 2090.449256 | 787.1686644 | 0.376554782 | -1.40906833 | 0.005165039 | 0.075965342 | Down |
| TMEM100  | 299.8402813 | 491.2741222 | 108.4064405 | 0.220663853 | -2.18007778 | 0.000195295 | 0.008211945 | Down |
| TMEM102  | 111.0839784 | 29.95056401 | 192.2173928 | 6.417822141 | 2.682083808 | 8.86E-06    | 0.000774154 | Up   |
| TMEM116  | 89.99982113 | 20.32083511 | 159.6788072 | 7.857886071 | 2.974141251 | 5.94E-06    | 0.000569802 | Up   |
| TMEM119  | 959.7398292 | 1618.194502 | 301.2851561 | 0.186185997 | -2.42518353 | 0.000236294 | 0.009535793 | Down |
| TMEM125  | 457.0356354 | 127.756658  | 786.3146129 | 6.154783831 | 2.621708187 | 0.030364387 | 0.233181432 | Up   |
| TMEM132C | 47.21265058 | 8.041441217 | 86.38385994 | 10.74233556 | 3.425235788 | 0.002579373 | 0.047276381 | Up   |
| TMEM136  | 164.5753693 | 269.1036878 | 60.04705083 | 0.223137228 | -2.16399687 | 0.026826262 | 0.215787662 | Down |
| TMEM139  | 66.5361949  | 25.52872934 | 107.5436605 | 4.212652304 | 2.074728846 | 0.035255556 | 0.252571472 | Up   |
| TMEM1    | 143.89      | 56.22635669 | 231.5733189 | 4.1185      | 2.042150    | 0.0002      | 0.0084      | Up   |

|              |                 |             |             |                 |                     |                 |                 |      |
|--------------|-----------------|-------------|-------------|-----------------|---------------------|-----------------|-----------------|------|
| 44           | 98378           |             |             | 90151           | 568                 | 0198            | 10137           |      |
| TMEM1<br>64  | 2440.6<br>65451 | 1559.801924 | 3321.528979 | 2.1294<br>55624 | 1.090484<br>665     | 0.0298<br>63011 | 0.2308<br>04991 | Up   |
| TMEM1<br>7   | 234.36<br>97459 | 322.2329642 | 146.5065275 | 0.4546<br>60273 | -<br>1.137139<br>14 | 0.0200<br>75165 | 0.1838<br>29071 | Down |
| TMEM1<br>76A | 593.09<br>53032 | 191.2632435 | 994.9273628 | 5.2018<br>74362 | 2.379031<br>555     | 8.61E-<br>07    | 0.0001<br>35077 | Up   |
| TMEM1<br>76B | 758.30<br>8333  | 387.0606212 | 1129.556045 | 2.9182<br>92337 | 1.545124<br>411     | 0.0010<br>65347 | 0.0265<br>15472 | Up   |
| TMEM1<br>84A | 142.33<br>48079 | 31.15234397 | 253.5172718 | 8.1379<br>83839 | 3.024671<br>415     | 3.62E-<br>07    | 6.51E-<br>05    | Up   |
| TMEM1<br>87  | 143.14<br>02571 | 75.41213658 | 210.8683775 | 2.7962<br>12746 | 1.483474<br>131     | 0.0096<br>28565 | 0.1153<br>318   | Up   |
| TMEM1<br>91C | 11.967<br>627   | 2.78836535  | 21.14688865 | 7.5839<br>73402 | 2.922953<br>905     | 0.0334<br>65905 | 0.2453<br>03316 | Up   |
| TMEM2<br>00B | 419.38<br>03142 | 599.6089707 | 239.1516578 | 0.3988<br>4603  | -<br>1.326096<br>18 | 0.0170<br>38502 | 0.1663<br>19009 | Down |
| TMEM2<br>10  | 6.2531<br>94126 | 0           | 12.50638825 | Inf             | Inf                 | 0.0065<br>90665 | 0.0893<br>90233 | Up   |
| TMEM2<br>29B | 207.22<br>39536 | 129.7122035 | 284.7357036 | 2.1951<br>34273 | 1.134309<br>19      | 0.0352<br>94215 | 0.2526<br>10252 | Up   |
| TMEM2<br>33  | 38.920<br>75757 | 0.309818372 | 77.53169676 | 250.24<br>88675 | 7.967219<br>73      | 0.0134<br>4067  | 0.1436<br>3758  | Up   |
| TMEM2<br>45  | 222.04<br>19269 | 338.1136376 | 105.9702161 | 0.3134<br>15977 | -<br>1.673849<br>37 | 0.0435<br>56594 | 0.2824<br>58939 | Down |
| TMEM2<br>55A | 74.895<br>36198 | 143.5789427 | 6.211781249 | 0.0432<br>63874 | -<br>4.530693<br>34 | 3.19E-<br>10    | 2.30E-<br>07    | Down |
| TMEM3<br>0B  | 722.50<br>30097 | 366.7544024 | 1078.251617 | 2.9399<br>82751 | 1.555807<br>691     | 0.0014<br>68146 | 0.0327<br>36573 | Up   |
| TMEM4<br>5B  | 168.37<br>01673 | 9.263455129 | 327.4768794 | 35.351<br>48331 | 5.143698<br>845     | 3.68E-<br>16    | 1.33E-<br>12    | Up   |
| TMEM4<br>7   | 299.32<br>66399 | 535.660487  | 62.99279285 | 0.1175<br>98356 | -<br>3.088060<br>2  | 0.0001<br>32123 | 0.0062<br>18686 | Down |
| TMEM5<br>5A  | 45.862<br>8054  | 66.19920057 | 25.52641024 | 0.3855<br>99977 | -<br>1.374823<br>13 | 0.0327<br>52897 | 0.2425<br>90527 | Down |
| TMEM5<br>9L  | 1018.4<br>08427 | 1815.123678 | 221.6931767 | 0.1221<br>36678 | -<br>3.033431<br>58 | 0.0274<br>10951 | 0.2185<br>00286 | Down |

|               |                 |             |             |                 |                     |                 |                 |      |
|---------------|-----------------|-------------|-------------|-----------------|---------------------|-----------------|-----------------|------|
| TMEM6<br>3C   | 37.780<br>1624  | 5.941962989 | 69.61836182 | 11.716<br>39102 | 3.550456<br>342     | 0.0089<br>93246 | 0.1103<br>5997  | Up   |
| TMEM6<br>5    | 322.80<br>33008 | 519.5595416 | 126.0470599 | 0.2426<br>03686 | -<br>2.043326<br>62 | 0.0008<br>14373 | 0.0217<br>95968 | Down |
| TMEM7<br>9    | 201.16<br>04322 | 70.1093464  | 332.2115179 | 4.7384<br>76893 | 2.244423<br>403     | 0.0005<br>94408 | 0.0174<br>63386 | Up   |
| TMOD1         | 353.41<br>20072 | 642.1579684 | 64.66604605 | 0.1007<br>0115  | -<br>3.311847<br>93 | 0.0053<br>92167 | 0.0780<br>65249 | Down |
| TMOD2         | 383.41<br>66824 | 666.5351685 | 100.2981963 | 0.1504<br>76976 | -<br>2.732385<br>34 | 0.0002<br>58937 | 0.0100<br>02082 | Down |
| TMPRS<br>S2   | 1099.9<br>55102 | 224.8832339 | 1975.02697  | 8.7824<br>55395 | 3.134624<br>344     | 3.81E-<br>09    | 1.86E-<br>06    | Up   |
| TMPRS<br>S4   | 47.534<br>47824 | 1.572318722 | 93.49663775 | 59.464<br>17633 | 5.893948<br>886     | 5.03E-<br>10    | 3.49E-<br>07    | Up   |
| TMTC1         | 202.13<br>62571 | 322.397391  | 81.87512312 | 0.2539<br>57152 | -<br>1.977342<br>99 | 0.0027<br>0321  | 0.0487<br>57111 | Down |
| TMTC3         | 641.27<br>98884 | 903.9583312 | 378.6014455 | 0.4188<br>26214 | -<br>1.255576<br>35 | 0.0129<br>37256 | 0.1407<br>19708 | Down |
| TMX4          | 1472.3<br>55567 | 2043.652451 | 901.0586832 | 0.4409<br>06027 | -<br>1.181456<br>9  | 0.0089<br>44447 | 0.1098<br>35862 | Down |
| TNC           | 7882.1<br>4445  | 15441.72924 | 322.5596578 | 0.0208<br>8883  | -<br>5.581124<br>5  | 0.0490<br>03419 | 0.3025<br>85691 | Down |
| TNF           | 74.325<br>27495 | 24.92421967 | 123.7263302 | 4.9641<br>00456 | 2.311532<br>311     | 0.0003<br>49264 | 0.0124<br>33254 | Up   |
| TNFAIP<br>6   | 343.62<br>01877 | 658.0946484 | 29.14572692 | 0.0442<br>88047 | -<br>4.496938<br>8  | 9.01E-<br>05    | 0.0046<br>4414  | Down |
| TNFAIP<br>8L3 | 469.04<br>18876 | 889.8200118 | 48.26376348 | 0.0542<br>39917 | -<br>4.204501<br>22 | 0.0001<br>68689 | 0.0073<br>85877 | Down |
| TNFRS<br>F12A | 1024.3<br>42678 | 1704.002655 | 344.6827006 | 0.2022<br>78265 | -<br>2.305586<br>79 | 0.0492<br>12116 | 0.3030<br>20077 | Down |
| TNFRS<br>F19  | 403.98<br>99102 | 225.5225874 | 582.457233  | 2.5827<br>00207 | 1.368880<br>189     | 0.0272<br>50156 | 0.2178<br>92535 | Up   |
| TNFRS<br>F21  | 3764.1<br>62491 | 1558.757359 | 5969.567624 | 3.8296<br>96515 | 1.937230<br>07      | 0.0069<br>66661 | 0.0925<br>78231 | Up   |



|              |                 |             |             |                 |                     |                 |                 |          |
|--------------|-----------------|-------------|-------------|-----------------|---------------------|-----------------|-----------------|----------|
| TNFSF1<br>1  | 143.24<br>29664 | 5.282270013 | 281.2036628 | 53.235<br>38215 | 5.734313<br>527     | 8.38E-<br>05    | 0.0044<br>07022 | Up       |
| TNFSF1<br>2  | 519.60<br>38161 | 726.8794585 | 312.3281737 | 0.4296<br>83588 | -<br>1.218653<br>42 | 0.0441<br>87266 | 0.2847<br>78169 | Dow<br>n |
| TNFSF1<br>3B | 63.938<br>19092 | 34.96989958 | 92.90648226 | 2.6567<br>55764 | 1.409665<br>607     | 0.0246<br>47814 | 0.2059<br>38826 | Up       |
| TNFSF1<br>8  | 71.129<br>04978 | 134.8857272 | 7.372372329 | 0.0546<br>5643  | -<br>4.193464<br>96 | 0.0006<br>32224 | 0.0182<br>47504 | Dow<br>n |
| TNK1         | 331.18<br>20195 | 126.4017795 | 535.9622595 | 4.2401<br>48056 | 2.084114<br>641     | 4.15E-<br>05    | 0.0026<br>4502  | Up       |
| TNMD         | 10.508<br>49007 | 21.01698013 | 0           | 0               | #NAME<br>?          | 0.0002<br>73855 | 0.0104<br>4412  | Dow<br>n |
| TNS1         | 7951.9<br>32333 | 13696.52496 | 2207.339702 | 0.1611<br>60565 | -<br>2.633429<br>33 | 1.30E-<br>07    | 3.00E-<br>05    | Dow<br>n |
| TNXB         | 7446.6<br>4249  | 11697.08064 | 3196.204336 | 0.2732<br>48038 | -<br>1.871716<br>96 | 8.14E-<br>06    | 0.0007<br>25474 | Dow<br>n |
| TOP1M<br>T   | 41.198<br>8653  | 12.33627949 | 70.06145111 | 5.6793<br>01539 | 2.505713<br>513     | 0.0016<br>2946  | 0.0351<br>60072 | Up       |
| TOX3         | 45.807<br>91227 | 20.35705655 | 71.258768   | 3.5004<br>45549 | 1.807538<br>565     | 0.0062<br>60149 | 0.0865<br>00274 | Up       |
| TP53I11      | 304.14<br>2026  | 428.1014052 | 180.1826467 | 0.4208<br>87772 | -<br>1.248492<br>5  | 0.0067<br>28837 | 0.0904<br>56371 | Dow<br>n |
| TP53IN<br>P2 | 673.61<br>74263 | 994.562963  | 352.6718896 | 0.3545<br>99862 | -<br>1.495736<br>12 | 0.0324<br>97639 | 0.2424<br>05147 | Dow<br>n |
| TP63         | 556.34<br>1505  | 280.9476648 | 831.7353452 | 2.9604<br>63636 | 1.565823<br>133     | 0.0400<br>22767 | 0.2700<br>28158 | Up       |
| TP73         | 124.70<br>55939 | 62.16063156 | 187.2505563 | 3.0123<br>6573  | 1.590896<br>938     | 0.0183<br>19894 | 0.1742<br>99877 | Up       |
| TPBG         | 1084.5<br>2063  | 1961.417007 | 207.6242538 | 0.1058<br>54213 | -<br>3.239849<br>4  | 0.0465<br>07652 | 0.2935<br>44975 | Dow<br>n |
| TPI1         | 4094.8<br>46664 | 5731.893894 | 2457.799434 | 0.4287<br>93603 | -<br>1.221644<br>71 | 0.0145<br>20128 | 0.1511<br>81121 | Dow<br>n |
| TPM1         | 16606.<br>41798 | 27271.3514  | 5941.484559 | 0.2178<br>65425 | -<br>2.198490<br>84 | 0.0306<br>47563 | 0.2347<br>56432 | Dow<br>n |
| TPM2         | 29634.          | 56157.90922 | 3111.513377 | 0.0554          | -                   | 0.0144          | 0.1508          | Dow      |

|              |                 |             |             |                 |                     |                 |                 |          |
|--------------|-----------------|-------------|-------------|-----------------|---------------------|-----------------|-----------------|----------|
|              | 7113            |             |             | 06503           | 4.173800<br>87      | 57748           | 40549           | n        |
| TPM4         | 11345.<br>83142 | 16760.90119 | 5930.76164  | 0.3538<br>45033 | -<br>1.498810<br>43 | 0.0013<br>50458 | 0.0309<br>14857 | Dow<br>n |
| TPO          | 56.630<br>02184 | 4.383910933 | 108.8761327 | 24.835<br>38886 | 4.634325<br>431     | 0.0043<br>69981 | 0.0675<br>58475 | Up       |
| TPX2         | 316.66<br>73244 | 438.029261  | 195.3053878 | 0.4458<br>72925 | -<br>1.165295<br>5  | 0.0195<br>01907 | 0.1809<br>64457 | Dow<br>n |
| TRABD<br>2B  | 739.93<br>76192 | 1148.14111  | 331.734128  | 0.2889<br>31495 | -<br>1.791200<br>62 | 0.0130<br>32641 | 0.1410<br>29279 | Dow<br>n |
| TRAF2        | 1179.2<br>06534 | 712.6000556 | 1645.813013 | 2.3095<br>88668 | 1.207635<br>934     | 0.0047<br>97148 | 0.0721<br>73265 | Up       |
| TRAF4        | 1133.5<br>35163 | 663.7139474 | 1603.356379 | 2.4157<br>34045 | 1.272461<br>633     | 0.0078<br>69436 | 0.1008<br>21561 | Up       |
| TRAF5        | 328.84<br>06673 | 514.0925153 | 143.5888193 | 0.2793<br>05407 | -<br>1.840084<br>59 | 0.0493<br>19083 | 0.3030<br>20077 | Dow<br>n |
| TRAK2        | 376.47<br>57544 | 529.7581764 | 223.1933324 | 0.4213<br>11727 | -<br>1.247040<br>02 | 0.0073<br>00265 | 0.0953<br>58061 | Dow<br>n |
| TRAM2        | 2065.7<br>15355 | 3131.335536 | 1000.095175 | 0.3193<br>82948 | -<br>1.646640<br>81 | 0.0159<br>88185 | 0.1598<br>72987 | Dow<br>n |
| TRAPP<br>C6A | 446.13<br>70308 | 210.9725477 | 681.3015138 | 3.2293<br>37282 | 1.691238<br>128     | 0.0006<br>21049 | 0.0179<br>5369  | Up       |
| TRAT1        | 63.455<br>66607 | 36.81730545 | 90.0940267  | 2.4470<br>56503 | 1.291047<br>414     | 0.0379<br>06785 | 0.2626<br>37007 | Up       |
| TREM2        | 103.74<br>77224 | 20.39881507 | 187.0966298 | 9.1719<br>3617  | 3.197226<br>315     | 4.08E-<br>07    | 7.07E-<br>05    | Up       |
| TRERF<br>1   | 332.46<br>86852 | 464.865884  | 200.0714863 | 0.4303<br>85393 | -<br>1.216298<br>98 | 0.0201<br>14173 | 0.1839<br>9572  | Dow<br>n |
| TRIM14       | 135.26<br>07646 | 60.03667293 | 210.4848563 | 3.5059<br>38056 | 1.809800<br>506     | 0.0007<br>49432 | 0.0206<br>71255 | Up       |
| TRIM16       | 371.81<br>22342 | 501.7366024 | 241.887866  | 0.4821<br>01295 | -<br>1.052591<br>79 | 0.0332<br>72551 | 0.2444<br>82093 | Dow<br>n |
| TRIM29       | 803.20<br>40917 | 308.4195827 | 1297.988601 | 4.2085<br>1552  | 2.073311<br>438     | 0.0011<br>27439 | 0.0274<br>50006 | Up       |
| TRIM36       | 202.33<br>1042  | 131.4918867 | 273.1701972 | 2.0774<br>68079 | 1.054826<br>31      | 0.0379<br>09365 | 0.2626<br>37007 | Up       |

|             |                 |             |             |                 |                     |                 |                 |          |
|-------------|-----------------|-------------|-------------|-----------------|---------------------|-----------------|-----------------|----------|
| TRIM47      | 819.63<br>58061 | 1130.901734 | 508.3698781 | 0.4495<br>26128 | -<br>1.153523<br>12 | 0.0110<br>25394 | 0.1259<br>55204 | Dow<br>n |
| TRIOB<br>P  | 1175.3<br>65933 | 1596.461539 | 754.2703277 | 0.4724<br>63827 | -<br>1.081724<br>22 | 0.0237<br>99767 | 0.2015<br>60566 | Dow<br>n |
| TRNP1       | 98.256<br>71091 | 154.5238111 | 41.98961073 | 0.2717<br>35537 | -<br>1.879724<br>85 | 0.0007<br>81861 | 0.0212<br>0436  | Dow<br>n |
| TRPC1       | 228.06<br>01834 | 312.1291886 | 143.9911781 | 0.4613<br>1917  | -<br>1.116162<br>85 | 0.0279<br>51096 | 0.2210<br>47711 | Dow<br>n |
| TRPC6       | 241.68<br>83927 | 344.6215905 | 138.7551949 | 0.4026<br>30592 | -<br>1.312471<br>3  | 0.0434<br>00289 | 0.2819<br>87349 | Dow<br>n |
| TRPM2       | 647.88<br>43971 | 367.6495255 | 928.1192686 | 2.5244<br>67473 | 1.335979<br>089     | 0.0052<br>0903  | 0.0763<br>16805 | Up       |
| TRPM3       | 88.227<br>23497 | 134.5966921 | 41.85777785 | 0.3109<br>86676 | -<br>1.685075<br>32 | 0.0073<br>53135 | 0.0958<br>40468 | Dow<br>n |
| TRPM6       | 107.04<br>19485 | 157.6336988 | 56.45019825 | 0.3581<br>09964 | -<br>1.481525<br>43 | 0.0204<br>14501 | 0.1853<br>33262 | Dow<br>n |
| TRPV6       | 197.24<br>11789 | 20.70350804 | 373.7788497 | 18.053<br>88966 | 4.174237<br>79      | 0.0011<br>92399 | 0.0284<br>51959 | Up       |
| TSC22<br>D2 | 897.96<br>00435 | 1198.735665 | 597.1844222 | 0.4981<br>78572 | -<br>1.005265<br>12 | 0.0293<br>30408 | 0.2284<br>50443 | Dow<br>n |
| TSHZ3       | 269.54<br>62479 | 426.7152186 | 112.3772772 | 0.2633<br>54275 | -<br>1.924923<br>21 | 0.0032<br>07025 | 0.0549<br>3972  | Dow<br>n |
| TSPAN<br>1  | 190.86<br>49785 | 6.023777742 | 375.7061793 | 62.370<br>52484 | 5.962792<br>494     | 7.90E-<br>09    | 3.24E-<br>06    | Up       |
| TSPAN<br>18 | 317.10<br>69504 | 463.5991312 | 170.6147697 | 0.3680<br>22195 | -<br>1.442135<br>32 | 0.0024<br>6453  | 0.0459<br>07943 | Dow<br>n |
| TSPAN<br>19 | 129.50<br>70115 | 23.97963748 | 235.0343855 | 9.8014<br>15294 | 3.292990<br>085     | 9.09E-<br>08    | 2.27E-<br>05    | Up       |
| TSPAN<br>2  | 304.86<br>02589 | 529.3847681 | 80.3357498  | 0.1517<br>53044 | -<br>2.720202<br>64 | 0.0471<br>28306 | 0.2959<br>31755 | Dow<br>n |
| TSPAN<br>3  | 3039.5<br>33261 | 1658.904562 | 4420.161959 | 2.6645<br>06481 | 1.413868<br>342     | 0.0483<br>39097 | 0.2999<br>61809 | Up       |
| TSPAN       | 130.89          | 78.23886834 | 183.5540873 | 2.3460          | 1.230247            | 0.0185          | 0.1757          | Up       |

|            |                 |             |             |                 |                     |                 |                 |      |
|------------|-----------------|-------------|-------------|-----------------|---------------------|-----------------|-----------------|------|
| 33         | 64778           |             |             | 72881           | 832                 | 33837           | 7912            |      |
| TSPYL<br>2 | 723.18<br>50713 | 451.7116149 | 994.6585277 | 2.2019<br>76869 | 1.138799<br>314     | 0.0134<br>01922 | 0.1435<br>61328 | Up   |
| TSPYL<br>4 | 1312.0<br>80556 | 787.0841966 | 1837.076915 | 2.3340<br>28459 | 1.222822<br>152     | 0.0088<br>61363 | 0.1092<br>61882 | Up   |
| TST        | 1252.5<br>60898 | 473.5092045 | 2031.612592 | 4.2905<br>4509  | 2.101160<br>946     | 0.0125<br>0764  | 0.1372<br>45698 | Up   |
| TSTD1      | 725.37<br>30079 | 439.5466238 | 1011.199392 | 2.3005<br>50925 | 1.201979<br>392     | 0.0130<br>28744 | 0.1410<br>29279 | Up   |
| TTC12      | 46.188<br>3534  | 13.18008507 | 79.19662174 | 6.0088<br>09604 | 2.587079<br>209     | 0.0002<br>46302 | 0.0097<br>6492  | Up   |
| TTC21<br>A | 220.01<br>01835 | 137.0364674 | 302.9838997 | 2.2109<br>72784 | 1.144681<br>266     | 0.0127<br>14312 | 0.1388<br>33817 | Up   |
| TTC28      | 996.44<br>5105  | 1478.507457 | 514.3827532 | 0.3479<br>0677  | -<br>1.523227<br>34 | 0.0013<br>40969 | 0.0307<br>36638 | Down |
| TTC31      | 117.63<br>38676 | 72.0337403  | 163.2339949 | 2.2660<br>76899 | 1.180196<br>82      | 0.0279<br>36792 | 0.2210<br>31487 | Up   |
| TTC39<br>A | 600.16<br>40003 | 279.3482841 | 920.9797165 | 3.2968<br>86965 | 1.721104<br>425     | 0.0139<br>59994 | 0.1469<br>76942 | Up   |
| TTC39<br>C | 194.37<br>75663 | 121.8139893 | 266.9411434 | 2.1913<br>83313 | 1.131841<br>86      | 0.0272<br>06752 | 0.2176<br>41954 | Up   |
| TTC6       | 31.251<br>51504 | 2.950953379 | 59.55207671 | 20.180<br>62269 | 4.334898<br>785     | 0.0001<br>79917 | 0.0077<br>09084 | Up   |
| TTLL10     | 51.248<br>9909  | 14.81695897 | 87.68102284 | 5.9176<br>12584 | 2.565015<br>249     | 0.0003<br>05034 | 0.0113<br>45364 | Up   |
| TTLL7      | 296.60<br>4596  | 493.8397593 | 99.36943272 | 0.2012<br>17968 | -<br>2.313168<br>96 | 1.98E-<br>06    | 0.0002<br>44704 | Down |
| TUBA1<br>A | 3761.1<br>99743 | 5266.898268 | 2255.501218 | 0.4282<br>40893 | -<br>1.223505<br>53 | 0.0150<br>94818 | 0.1550<br>51755 | Down |
| TUBA1<br>D | 29.725<br>99049 | 7.731192638 | 51.72078834 | 6.6898<br>84828 | 2.741981<br>374     | 0.0015<br>29889 | 0.0335<br>73797 | Up   |
| TUBA8      | 60.086<br>16368 | 29.65312894 | 90.51919841 | 3.0526<br>01922 | 1.610039<br>466     | 0.0361<br>88919 | 0.2558<br>04043 | Up   |
| TUBB       | 6538.1<br>18379 | 9831.875518 | 3244.361241 | 0.3299<br>83962 | -<br>1.599532<br>19 | 0.0011<br>34997 | 0.0275<br>93282 | Down |
| TUBB6      | 2689.3<br>66889 | 4344.789675 | 1033.944102 | 0.2379<br>73338 | -<br>2.071128<br>15 | 0.0187<br>26874 | 0.1764<br>65324 | Down |
| TUBD1      | 146.70<br>99587 | 80.72017762 | 212.6997399 | 2.6350<br>25667 | 1.397817<br>015     | 0.0124<br>93711 | 0.1372<br>45698 | Up   |

|             |                 |             |             |                 |                     |                 |                 |      |
|-------------|-----------------|-------------|-------------|-----------------|---------------------|-----------------|-----------------|------|
| TULP2       | 301.43<br>63874 | 198.43898   | 404.4337949 | 2.0380<br>76365 | 1.027208<br>109     | 0.0226<br>36538 | 0.1962<br>23216 | Up   |
| TUSC5       | 749.98<br>96977 | 1496.780919 | 3.198476266 | 0.0021<br>36903 | -<br>8.870262<br>58 | 0.0101<br>24686 | 0.1193<br>72037 | Down |
| TWIST<br>1  | 313.71<br>0341  | 502.5594063 | 124.8612756 | 0.2484<br>50778 | -<br>2.008968<br>03 | 0.0171<br>01215 | 0.1668<br>40894 | Down |
| TXK         | 84.215<br>81598 | 36.60740328 | 131.8242287 | 3.6010<br>26483 | 1.848408<br>209     | 0.0020<br>93118 | 0.0410<br>84536 | Up   |
| TXNIP       | 25533.<br>19916 | 15499.80774 | 35566.59059 | 2.2946<br>47211 | 1.198272<br>364     | 0.0053<br>48216 | 0.0776<br>78321 | Up   |
| TYRO3       | 283.29<br>80793 | 178.2900862 | 388.3060724 | 2.1779<br>45396 | 1.122967<br>784     | 0.0237<br>85486 | 0.2015<br>34232 | Up   |
| UBALD<br>2  | 959.17<br>8477  | 551.5699967 | 1366.786957 | 2.4779<br>93665 | 1.309172<br>499     | 0.0137<br>62277 | 0.1455<br>20346 | Up   |
| UBD         | 435.05<br>64585 | 243.0340879 | 627.0788291 | 2.5802<br>09363 | 1.367488<br>133     | 0.0077<br>54602 | 0.0997<br>0439  | Up   |
| UGGT2       | 254.53<br>03764 | 470.1077047 | 38.95304809 | 0.0828<br>59838 | -<br>3.593183<br>2  | 8.71E-<br>07    | 0.0001<br>35398 | Down |
| UGT8        | 175.74<br>15381 | 41.48740869 | 309.9956675 | 7.4720<br>42175 | 2.901502<br>598     | 0.0213<br>84957 | 0.1898<br>44113 | Up   |
| UHKM<br>1   | 71.784<br>41975 | 107.2259068 | 36.34293269 | 0.3389<br>37984 | -<br>1.560906<br>77 | 0.0243<br>27566 | 0.2044<br>53029 | Down |
| UMOD<br>L1  | 17.445<br>96907 | 34.89193815 | 0           | 0               | #NAME<br>?          | 2.56E-<br>05    | 0.0018<br>1352  | Down |
| UNC93<br>B1 | 1294.1<br>66331 | 856.299218  | 1732.033445 | 2.0226<br>96516 | 1.016279<br>875     | 0.0327<br>04851 | 0.2425<br>27832 | Up   |
| UPP1        | 74.209<br>82934 | 117.2379155 | 31.18174317 | 0.2659<br>69785 | -<br>1.910665<br>73 | 0.0012<br>57424 | 0.0295<br>34737 | Down |
| USH1C       | 62.928<br>53977 | 11.59263927 | 114.2644403 | 9.8566<br>37271 | 3.301095<br>535     | 0.0250<br>12172 | 0.2071<br>29095 | Up   |
| USP2        | 214.16<br>9142  | 105.4102268 | 322.9280571 | 3.0635<br>36309 | 1.615197<br>95      | 0.0036<br>68265 | 0.0597<br>21877 | Up   |
| USP35       | 123.38<br>01739 | 176.8126635 | 69.94768443 | 0.3956<br>03364 | -<br>1.337873<br>4  | 0.0232<br>83833 | 0.1991<br>30023 | Down |
| USP43       | 181.16<br>4903  | 83.25046626 | 279.0793398 | 3.3522<br>85607 | 1.745145<br>069     | 0.0007<br>50622 | 0.0206<br>72479 | Up   |
| USP44       | 58.690<br>62479 | 23.03482467 | 94.34642491 | 4.0958<br>16931 | 2.034151<br>233     | 0.0112<br>85837 | 0.1280<br>41015 | Up   |

|            |                 |             |             |                 |                     |                 |                 |          |
|------------|-----------------|-------------|-------------|-----------------|---------------------|-----------------|-----------------|----------|
| UST        | 453.08<br>43512 | 690.3436484 | 215.8250541 | 0.3126<br>34229 | -<br>1.677452<br>35 | 0.0353<br>67716 | 0.2528<br>42381 | Dow<br>n |
| UVSSA      | 231.79<br>20919 | 332.8006536 | 130.7835302 | 0.3929<br>78586 | -<br>1.347477<br>4  | 0.0096<br>2203  | 0.1153<br>301   | Dow<br>n |
| VASN       | 915.35<br>84609 | 1389.045116 | 441.6718061 | 0.3179<br>67934 | -<br>1.653046<br>81 | 0.0009<br>82407 | 0.0250<br>6596  | Dow<br>n |
| VAV1       | 169.31<br>32701 | 108.2000699 | 230.4264704 | 2.1296<br>33286 | 1.090605<br>026     | 0.0268<br>31506 | 0.2157<br>87662 | Up       |
| VAV3       | 819.84<br>51621 | 361.6768457 | 1278.013479 | 3.5335<br>78369 | 1.821129<br>906     | 0.0001<br>16945 | 0.0056<br>55705 | Up       |
| VCAM1      | 1283.2<br>84888 | 1739.045023 | 827.524752  | 0.4758<br>50102 | -<br>1.071420<br>91 | 0.0224<br>62556 | 0.1954<br>66493 | Dow<br>n |
| VCAN       | 6228.2<br>8485  | 11641.94999 | 814.619713  | 0.0699<br>72789 | -<br>3.837062<br>19 | 0.0010<br>98904 | 0.0270<br>80775 | Dow<br>n |
| VCL        | 10803.<br>15785 | 17889.82119 | 3716.494513 | 0.2077<br>43525 | -<br>2.267124<br>58 | 0.0041<br>81335 | 0.0653<br>61438 | Dow<br>n |
| VCPK<br>MT | 299.05<br>30861 | 149.5990482 | 448.507124  | 2.9980<br>61348 | 1.584029<br>905     | 0.0006<br>78628 | 0.0191<br>57709 | Up       |
| VEPH1      | 142.54<br>52575 | 42.23551351 | 242.8550014 | 5.7500<br>18912 | 2.523566<br>701     | 0.0109<br>49329 | 0.1255<br>15136 | Up       |
| VGLL1      | 14.004<br>31676 | 2.5250007   | 25.48363281 | 10.092<br>52505 | 3.335215<br>262     | 0.0043<br>14666 | 0.0669<br>12591 | Up       |
| VGLL3      | 2748.3<br>24531 | 5021.243891 | 475.4051719 | 0.0946<br>78765 | -<br>3.400815<br>3  | 0.0080<br>07108 | 0.1020<br>77894 | Dow<br>n |
| VIL1       | 16.730<br>45379 | 6.755283799 | 26.70562378 | 3.9532<br>94128 | 1.983055<br>297     | 0.0398<br>5218  | 0.2696<br>40422 | Up       |
| VILL       | 97.228<br>39901 | 46.65780939 | 147.7989886 | 3.1677<br>22415 | 1.663445<br>919     | 0.0076<br>83048 | 0.0990<br>87383 | Up       |
| VIM        | 42980.<br>98052 | 66948.74563 | 19013.21541 | 0.2839<br>96589 | -<br>1.816054<br>49 | 8.70E-<br>05    | 0.0045<br>20444 | Dow<br>n |
| VNN1       | 271.17<br>65647 | 151.3017119 | 391.0514175 | 2.5845<br>80257 | 1.369930<br>002     | 0.0040<br>56646 | 0.0644<br>7387  | Up       |
| VSIG1      | 10.539<br>58934 | 0.619636744 | 20.45954193 | 33.018<br>60665 | 5.045207<br>336     | 0.0012<br>12683 | 0.0288<br>21599 | Up       |
| VSNL1      | 127.44<br>85569 | 30.32432628 | 224.5727875 | 7.4056<br>97507 | 2.888635<br>622     | 0.0011<br>74499 | 0.0282<br>49053 | Up       |

|             |                 |             |             |                 |                     |                 |                 |          |
|-------------|-----------------|-------------|-------------|-----------------|---------------------|-----------------|-----------------|----------|
| VSTM4       | 642.96<br>74756 | 1002.165011 | 283.7699398 | 0.2831<br>56902 | -<br>1.820326<br>4  | 0.0384<br>03802 | 0.2643<br>13518 | Dow<br>n |
| VWA2        | 30.394<br>40002 | 49.4815233  | 11.30727673 | 0.2285<br>1513  | -<br>2.129638<br>4  | 0.0313<br>24337 | 0.2369<br>22312 | Dow<br>n |
| VWA7        | 120.91<br>39693 | 31.36585031 | 210.4620883 | 6.7099<br>11775 | 2.746293<br>797     | 0.0005<br>09383 | 0.0157<br>74927 | Up       |
| WBP1        | 1436.4<br>08492 | 767.3012762 | 2105.515708 | 2.7440<br>53442 | 1.456308<br>579     | 0.0008<br>20356 | 0.0219<br>04736 | Up       |
| WBP5        | 86.731<br>88027 | 153.690668  | 19.77309253 | 0.1286<br>55128 | -<br>2.958419<br>14 | 1.79E-<br>05    | 0.0013<br>62542 | Dow<br>n |
| WDR17       | 246.12<br>34635 | 366.0102607 | 126.2366662 | 0.3448<br>99255 | -<br>1.535753<br>08 | 0.0234<br>66605 | 0.2000<br>3761  | Dow<br>n |
| WFDC1       | 1225.5<br>30753 | 2305.52666  | 145.5348456 | 0.0631<br>24339 | -<br>3.985659<br>82 | 0.0065<br>28914 | 0.0890<br>21228 | Dow<br>n |
| WFDC2       | 239.64<br>64895 | 23.01946699 | 456.2735119 | 19.821<br>2023  | 4.308972<br>57      | 2.34E-<br>11    | 2.22E-<br>08    | Up       |
| WFIKK<br>N2 | 83.977<br>88831 | 164.2412786 | 3.714498055 | 0.0226<br>16105 | -<br>5.466505<br>68 | 0.0005<br>74275 | 0.0170<br>20448 | Dow<br>n |
| WIPF1       | 1306.2<br>21888 | 1886.483628 | 725.960148  | 0.3848<br>21865 | -<br>1.377737<br>32 | 0.0119<br>80424 | 0.1333<br>21938 | Dow<br>n |
| WISP2       | 1085.9<br>52352 | 2025.361072 | 146.5436315 | 0.0723<br>54324 | -<br>3.788776<br>95 | 0.0048<br>16898 | 0.0724<br>10025 | Dow<br>n |
| WISP3       | 59.297<br>89314 | 7.071499663 | 111.5242866 | 15.770<br>95269 | 3.979197<br>908     | 0.0025<br>2124  | 0.0466<br>46823 | Up       |
| WNK2        | 919.04<br>06118 | 335.4689928 | 1502.612231 | 4.4791<br>38945 | 2.163221<br>42      | 3.30E-<br>06    | 0.0003<br>65249 | Up       |
| WNK4        | 142.33<br>82414 | 65.35747794 | 219.3190048 | 3.3556<br>83416 | 1.746606<br>615     | 0.0016<br>80341 | 0.0357<br>871   | Up       |
| WNT10<br>A  | 50.683<br>98998 | 19.89018723 | 81.47779272 | 4.0963<br>81386 | 2.034350<br>041     | 0.0151<br>38142 | 0.1552<br>4556  | Up       |
| WNT2        | 70.072<br>20573 | 99.70951114 | 40.43490031 | 0.4055<br>27014 | -<br>1.302130<br>07 | 0.0231<br>34503 | 0.1984<br>41893 | Dow<br>n |
| WNT2B       | 22.854<br>67217 | 41.42645769 | 4.282886636 | 0.1033<br>85297 | -<br>3.273897<br>07 | 0.0003<br>88496 | 0.0133<br>57214 | Dow<br>n |

|             |                 |             |             |                 |                     |                 |                 |      |
|-------------|-----------------|-------------|-------------|-----------------|---------------------|-----------------|-----------------|------|
| WNT5B       | 117.39<br>70146 | 48.19088275 | 186.6031464 | 3.8721<br>67011 | 1.953141<br>179     | 0.0004<br>77359 | 0.0150<br>54346 | Up   |
| WNT8B       | 5.7183<br>60776 | 0           | 11.43672155 | Inf             | Inf                 | 0.0326<br>80318 | 0.2425<br>27832 | Up   |
| WSCD2       | 62.924<br>50623 | 92.5189028  | 33.33010967 | 0.3602<br>51891 | -<br>1.472922<br>09 | 0.0225<br>48775 | 0.1957<br>44636 | Down |
| WTIP        | 427.41<br>70095 | 585.209902  | 269.624117  | 0.4607<br>30613 | -<br>1.118004<br>63 | 0.0331<br>46092 | 0.2440<br>49939 | Down |
| WWC1        | 1161.6<br>12795 | 488.697702  | 1834.527888 | 3.7539<br>11428 | 1.908394<br>611     | 7.38E-<br>05    | 0.0040<br>11515 | Up   |
| XCL2        | 57.513<br>80137 | 27.53316762 | 87.49443513 | 3.1777<br>83113 | 1.668020<br>663     | 0.0153<br>1606  | 0.1562<br>15935 | Up   |
| XG          | 1367.2<br>48154 | 2327.963177 | 406.5331315 | 0.1746<br>30396 | -<br>2.517623<br>4  | 5.30E-<br>06    | 0.0005<br>19473 | Down |
| XYLT1       | 823.35<br>07737 | 1464.194952 | 182.5065951 | 0.1246<br>46376 | -<br>3.004087<br>15 | 9.76E-<br>09    | 3.91E-<br>06    | Down |
| YDJC        | 45.053<br>36792 | 18.52947296 | 71.57726289 | 3.8628<br>87144 | 1.949679<br>529     | 0.0088<br>3781  | 0.1091<br>20642 | Up   |
| YOD1        | 34.536<br>72283 | 51.87952761 | 17.19391805 | 0.3314<br>20097 | -<br>1.593267<br>01 | 0.0480<br>99234 | 0.2991<br>93823 | Down |
| YWHA<br>G   | 1571.8<br>847   | 2342.468595 | 801.3008046 | 0.3420<br>75367 | -<br>1.547613<br>88 | 0.0013<br>32189 | 0.0306<br>91397 | Down |
| YWHA<br>Z   | 253.70<br>14214 | 358.8374861 | 148.5653566 | 0.4140<br>18497 | -<br>1.272232<br>87 | 0.0130<br>64145 | 0.1412<br>00787 | Down |
| ZAP70       | 1043.9<br>83163 | 362.0664654 | 1725.899862 | 4.7668<br>03961 | 2.253022<br>295     | 2.63E-<br>06    | 0.0003<br>0862  | Up   |
| ZBED6<br>CL | 344.81<br>57297 | 187.8420658 | 501.7893937 | 2.6713<br>36644 | 1.417561<br>797     | 0.0045<br>95779 | 0.0700<br>78827 | Up   |
| ZBP1        | 144.42<br>07863 | 76.01086002 | 212.8307126 | 2.8000<br>04006 | 1.485428<br>891     | 0.0059<br>63592 | 0.0835<br>8759  | Up   |
| ZBTB2<br>0  | 65.203<br>90164 | 95.22736776 | 35.18043552 | 0.3694<br>36186 | -<br>1.436602<br>91 | 0.0118<br>64706 | 0.1326<br>8905  | Down |
| ZBTB3<br>7  | 41.469<br>77934 | 60.33075295 | 22.60880574 | 0.3747<br>47614 | -<br>1.416008<br>8  | 0.0408<br>08661 | 0.2726<br>47198 | Down |
| ZBTB4       | 357.96          | 211.3187996 | 504.6167187 | 2.3879          | 1.255766            | 0.0218          | 0.1917          | Up   |



|             |                 |             |             |                 |                     |                 |                 |      |
|-------------|-----------------|-------------|-------------|-----------------|---------------------|-----------------|-----------------|------|
| 2           | 77592           |             |             | 40494           | 886                 | 26354           | 8061            |      |
| ZC3H12<br>A | 646.72<br>81832 | 400.6476458 | 892.8087206 | 2.2284<br>13745 | 1.156017<br>12      | 0.0137<br>00702 | 0.1449<br>82304 | Up   |
| ZCCHC<br>24 | 1173.5<br>05118 | 1781.091355 | 565.9188817 | 0.3177<br>37145 | -<br>1.654094<br>34 | 0.0003<br>75411 | 0.0130<br>73448 | Down |
| ZCWP<br>W1  | 134.28<br>95799 | 87.3866069  | 181.1925529 | 2.0734<br>59072 | 1.052039<br>57      | 0.0271<br>07003 | 0.2170<br>36494 | Up   |
| ZDBF2       | 13.078<br>71044 | 24.93210738 | 1.225313489 | 0.0491<br>46006 | -<br>4.346782<br>03 | 0.0120<br>13302 | 0.1333<br>95784 | Down |
| ZDHHC<br>2  | 774.41<br>36143 | 1404.776557 | 144.0506719 | 0.1025<br>43477 | -<br>3.285692<br>38 | 0.0004<br>66177 | 0.0148<br>31327 | Down |
| ZEB1        | 1058.0<br>34474 | 1578.438085 | 537.6308625 | 0.3406<br>09409 | -<br>1.553809<br>81 | 0.0288<br>34483 | 0.2261<br>50106 | Down |
| ZEB2        | 124.97<br>48688 | 223.4807547 | 26.46898302 | 0.1184<br>39653 | -<br>3.077775<br>93 | 0.0001<br>9671  | 0.0082<br>33078 | Down |
| ZFP36       | 2803.1<br>92431 | 4382.036005 | 1224.348858 | 0.2794<br>01825 | -<br>1.839586<br>65 | 0.0437<br>8166  | 0.2830<br>74325 | Down |
| ZFPM2       | 226.69<br>01222 | 416.5346172 | 36.84562724 | 0.0884<br>57539 | -<br>3.498871<br>08 | 0.0001<br>34955 | 0.0063<br>0688  | Down |
| ZFR2        | 46.671<br>80052 | 15.9786827  | 77.36491835 | 4.8417<br>58223 | 2.275531<br>039     | 0.0387<br>68222 | 0.2654<br>04161 | Up   |
| ZFYVE<br>19 | 190.56<br>55006 | 100.1024164 | 281.0285849 | 2.8074<br>10602 | 1.489240<br>083     | 0.0029<br>93861 | 0.0523<br>31638 | Up   |
| ZHX3        | 1188.0<br>60713 | 1716.386864 | 659.7345632 | 0.3843<br>74046 | -<br>1.379417<br>17 | 0.0015<br>63656 | 0.0341<br>9004  | Down |
| ZIC2        | 7.1371<br>30356 | 14.27426071 | 0           | 0               | #NAME<br>?          | 0.0036<br>09548 | 0.0591<br>93313 | Down |
| ZMAT1       | 70.019<br>35079 | 38.32700189 | 101.7116997 | 2.6537<br>87009 | 1.408052<br>586     | 0.0159<br>12346 | 0.1594<br>43543 | Up   |
| ZMIZ2       | 1626.3<br>96566 | 957.6681445 | 2295.124988 | 2.3965<br>76519 | 1.260975<br>004     | 0.0040<br>52815 | 0.0644<br>7387  | Up   |
| ZNF114      | 11.437<br>55828 | 20.62108202 | 2.254034546 | 0.1093<br>07288 | -<br>3.193538<br>5  | 0.0325<br>81148 | 0.2424<br>05147 | Down |
| ZNF182      | 349.11<br>57665 | 208.662375  | 489.569158  | 2.3462<br>26329 | 1.230342<br>19      | 0.0220<br>88005 | 0.1935<br>14094 | Up   |

|             |                 |             |             |                 |                     |                 |                 |      |
|-------------|-----------------|-------------|-------------|-----------------|---------------------|-----------------|-----------------|------|
| ZNF232      | 9.1048<br>26952 | 1.595545584 | 16.61410832 | 10.412<br>80706 | 3.380287<br>135     | 0.0204<br>02708 | 0.1853<br>19459 | Up   |
| ZNF274      | 274.04<br>69911 | 158.6455924 | 389.4483898 | 2.4548<br>32712 | 1.295624<br>713     | 0.0092<br>39513 | 0.1119<br>76031 | Up   |
| ZNF286<br>A | 458.73<br>84978 | 290.1210984 | 627.3558971 | 2.1623<br>93223 | 1.112628<br>896     | 0.0225<br>40434 | 0.1957<br>44636 | Up   |
| ZNF296      | 45.493<br>82569 | 22.94747284 | 68.04017853 | 2.9650<br>40159 | 1.568051<br>645     | 0.0369<br>14259 | 0.2594<br>06436 | Up   |
| ZNF32       | 346.48<br>97367 | 227.2289794 | 465.750494  | 2.0496<br>96722 | 1.035410<br>461     | 0.0219<br>2218  | 0.1924<br>95758 | Up   |
| ZNF367      | 144.12<br>66115 | 220.8423139 | 67.41090918 | 0.3052<br>44534 | -<br>1.711962<br>63 | 0.0030<br>29379 | 0.0527<br>12105 | Down |
| ZNF385<br>D | 174.08<br>41759 | 345.9143172 | 2.254034546 | 0.0065<br>16164 | -<br>7.261761<br>29 | 7.25E-<br>06    | 0.0006<br>63756 | Down |
| ZNF423      | 395.06<br>32249 | 614.7297996 | 175.3966502 | 0.2853<br>23162 | -<br>1.809331<br>23 | 0.0002<br>53887 | 0.0099<br>14059 | Down |
| ZNF507      | 133.42<br>32427 | 184.843193  | 82.00329242 | 0.4436<br>37069 | -<br>1.172548<br>18 | 0.0315<br>92345 | 0.2381<br>50572 | Down |
| ZNF536      | 4.9692<br>52896 | 9.938505791 | 0           | 0               | #NAME<br>?          | 0.0355<br>52346 | 0.2534<br>8453  | Down |
| ZNF683      | 58.222<br>99379 | 19.06663414 | 97.37935344 | 5.1073<br>17459 | 2.352565<br>737     | 0.0003<br>21398 | 0.0117<br>3624  | Up   |
| ZNF750      | 228.18<br>83117 | 88.07307531 | 368.3035482 | 4.1817<br>95025 | 2.064122<br>348     | 0.0001<br>51938 | 0.0069<br>03794 | Up   |
| ZNF805      | 42.358<br>22334 | 64.85336424 | 19.86308244 | 0.3062<br>76824 | -<br>1.707091<br>89 | 0.0414<br>03815 | 0.2743<br>57952 | Down |
| ZPBP2       | 56.699<br>7363  | 25.45564417 | 87.94382842 | 3.4547<br>86994 | 1.788596<br>764     | 0.0047<br>82608 | 0.0721<br>73265 | Up   |
| ZSCAN<br>23 | 38.645<br>76585 | 19.75595147 | 57.53558024 | 2.9123<br>16338 | 1.542167<br>071     | 0.0407<br>53609 | 0.2725<br>37759 | Up   |
| ZYG11<br>B  | 994.79<br>17171 | 1349.777595 | 639.805839  | 0.4740<br>08341 | -<br>1.077015<br>65 | 0.0249<br>14771 | 0.2069<br>2337  | Down |
| ZYX         | 8716.9<br>01371 | 13131.05099 | 4302.751756 | 0.3276<br>77637 | -<br>1.609650<br>88 | 0.0367<br>10339 | 0.2585<br>69019 | Down |

**Table S5**

| id     | base Mean       | baseMean_contr ol_Sample_non-lactation | baseMean_case _Sample_mid-lactation | foldC hange     | log2Fol dChang e     | pval            | padj            | up_ dow n |
|--------|-----------------|----------------------------------------|-------------------------------------|-----------------|----------------------|-----------------|-----------------|-----------|
| A4GALT | 878.72<br>22011 | 1417.37795                             | 340.066452                          | 0.2399<br>26444 | -<br>2.05933<br>5916 | 0.0340<br>45717 | 0.3481<br>32981 | Dow<br>n  |
| ABCA10 | 436.42<br>89572 | 618.02534                              | 254.8325744                         | 0.4123<br>33537 | -<br>1.278116<br>288 | 0.0064<br>97939 | 0.1313<br>83818 | Dow<br>n  |
| ABCA6  | 938.20<br>20769 | 1361.246031                            | 515.1581233                         | 0.3784<br>46006 | -<br>1.40184<br>0614 | 0.0044<br>69013 | 0.1061<br>49878 | Dow<br>n  |
| ABCA9  | 582.23<br>64997 | 870.1588436                            | 294.3141557                         | 0.3382<br>30379 | -<br>1.56392<br>1849 | 0.0054<br>11981 | 0.1173<br>98861 | Dow<br>n  |
| ABCB8  | 1809.7<br>21121 | 1027.224149                            | 2592.218093                         | 2.5235<br>17477 | 1.33543<br>6078      | 0.0221<br>53569 | 0.2734<br>30084 | Up        |
| ABCC11 | 55.724<br>16701 | 14.2369764                             | 97.21135763                         | 6.8280<br>90103 | 2.77148<br>2096      | 0.0004<br>90469 | 0.0256<br>39838 | Up        |
| ABCC9  | 941.78<br>93834 | 1517.13048                             | 366.4482873                         | 0.2415<br>4039  | -<br>2.04966<br>3642 | 2.41E-<br>05    | 0.0030<br>7519  | Dow<br>n  |
| ABCG4  | 24.327<br>36614 | 42.05241619                            | 6.602316094                         | 0.1570<br>02063 | -<br>2.671144<br>579 | 0.0093<br>02695 | 0.1617<br>89515 | Dow<br>n  |
| ABI3BP | 3593.2<br>51695 | 6342.57494                             | 843.9284499                         | 0.1330<br>57703 | -<br>2.90987<br>6066 | 7.36E-<br>06    | 0.0013<br>92975 | Dow<br>n  |
| ABO    | 572.53<br>47485 | 265.6274317                            | 879.4420654                         | 3.3108<br>10408 | 1.72718<br>4398      | 0.0053<br>03511 | 0.1170<br>22127 | Up        |
| ACADSB | 745.64<br>43015 | 1052.644565                            | 438.6440379                         | 0.4167<br>06695 | -<br>1.26289<br>5815 | 0.0089<br>57798 | 0.1579<br>29484 | Dow<br>n  |
| ACAN   | 224.55<br>89582 | 416.9129183                            | 32.20499822                         | 0.0772<br>46343 | -<br>3.69438<br>9558 | 0.0024<br>76954 | 0.0738<br>69104 | Dow<br>n  |
| ACAP3  | 1568.6<br>43982 | 2204.839142                            | 932.4488224                         | 0.4229<br>10137 | -<br>1.24157<br>6955 | 0.0130<br>65476 | 0.2032<br>49527 | Dow<br>n  |
| ACER1  | 10.851<br>86032 | 20.19512086                            | 1.508599773                         | 0.0747<br>01201 | -<br>3.74272<br>4761 | 0.0410<br>59808 | 0.3847<br>36043 | Dow<br>n  |

|        |                 |             |             |                 |                      |                 |                 |      |
|--------|-----------------|-------------|-------------|-----------------|----------------------|-----------------|-----------------|------|
| ACKR1  | 954.07<br>69841 | 1361.044781 | 547.1091877 | 0.4019<br>7736  | -<br>1.31481<br>3846 | 0.0392<br>33236 | 0.3778<br>55667 | Down |
| ACKR2  | 103.61<br>37496 | 186.2729656 | 20.95453353 | 0.1124<br>93691 | -<br>3.15208<br>3996 | 5.55E-<br>06    | 0.0011<br>73176 | Down |
| ACKR3  | 2330.0<br>03542 | 4205.035391 | 454.9716934 | 0.1081<br>96876 | -<br>3.20826<br>9249 | 5.32E-<br>07    | 0.0001<br>95152 | Down |
| ACKR4  | 323.00<br>8962  | 590.9661285 | 55.05179545 | 0.0931<br>55585 | -<br>3.42421<br>3922 | 0.0013<br>11831 | 0.0484<br>40758 | Down |
| ACSBG1 | 75.620<br>25922 | 111.0436315 | 40.19688696 | 0.3619<br>91826 | -<br>1.46597<br>0973 | 0.0089<br>02537 | 0.1577<br>14947 | Down |
| ACSM3  | 72.283<br>96892 | 20.12347564 | 124.4444622 | 6.1840<br>44171 | 2.62855<br>0624      | 0.0001<br>11972 | 0.0091<br>94511 | Up   |
| ACSS1  | 3847.3<br>17994 | 2049.694139 | 5644.94185  | 2.7540<br>41075 | 1.46155<br>0077      | 0.0076<br>33187 | 0.1435<br>85359 | Up   |
| ACTA2  | 75101.<br>14361 | 127408.3369 | 22793.9503  | 0.1789<br>047   | -<br>2.48273<br>6806 | 0.0314<br>40615 | 0.3329<br>77961 | Down |
| ACTB   | 58796.<br>78976 | 80995.08194 | 36598.49758 | 0.4518<br>60739 | -<br>1.14604<br>9884 | 0.0204<br>84172 | 0.2623<br>69556 | Down |
| ACTC1  | 309.93<br>06532 | 619.8613064 | 0           | 0               | #NAME<br>?           | 0.0332<br>92334 | 0.3434<br>13594 | Down |
| ACTG2  | 76291.<br>11755 | 151127.8656 | 1454.369557 | 0.0096<br>23437 | -<br>6.69923<br>1979 | 0.0013<br>50472 | 0.0492<br>60724 | Down |
| ACY1   | 620.33<br>59631 | 307.6512868 | 933.0206395 | 3.0327<br>21394 | 1.60061<br>2969      | 0.0201<br>30618 | 0.2600<br>63861 | Up   |
| ADAM12 | 293.10<br>07365 | 511.5753979 | 74.62607515 | 0.1458<br>75027 | -<br>2.77719<br>5169 | 0.0152<br>16424 | 0.2219<br>2778  | Down |
| ADAM19 | 1627.9<br>82044 | 2597.843121 | 658.1209665 | 0.2533<br>33606 | -<br>1.98088<br>9622 | 0.0015<br>97407 | 0.0556<br>70856 | Down |
| ADAM23 | 48.005<br>31266 | 75.6787841  | 20.33184121 | 0.2686<br>59724 | -<br>1.89614<br>8041 | 0.0029<br>25638 | 0.0837<br>76682 | Down |
| ADAM33 | 3016.5<br>17527 | 5414.338343 | 618.6967109 | 0.1142<br>7005  | -<br>3.12948<br>0775 | 0.0001<br>41437 | 0.0107<br>774   | Down |

|              |                 |             |             |                 |                      |                 |                 |          |
|--------------|-----------------|-------------|-------------|-----------------|----------------------|-----------------|-----------------|----------|
| ADAMTS<br>1  | 3772.8<br>55774 | 6343.11137  | 1202.600179 | 0.1895<br>91528 | -<br>2.39903<br>3594 | 0.0494<br>01407 | 0.4267<br>31044 | Dow<br>n |
| ADAMTS<br>10 | 1340.9<br>97221 | 1949.612674 | 732.3817693 | 0.3756<br>5501  | -<br>1.41251<br>975  | 0.0018<br>74637 | 0.0611<br>18937 | Dow<br>n |
| ADAMTS<br>12 | 309.89<br>60265 | 553.7096994 | 66.08235357 | 0.1193<br>44764 | -<br>3.06679<br>2819 | 3.37E-<br>08    | 2.02E-<br>05    | Dow<br>n |
| ADAMTS<br>14 | 69.955<br>61787 | 127.0864978 | 12.82473794 | 0.1009<br>13458 | -<br>3.30880<br>9509 | 1.14E-<br>05    | 0.0017<br>77323 | Dow<br>n |
| ADAMTS<br>15 | 317.91<br>84397 | 507.5949277 | 128.2419517 | 0.2526<br>46244 | -<br>1.98480<br>9365 | 0.0003<br>0862  | 0.0183<br>16561 | Dow<br>n |
| ADAMTS<br>17 | 899.54<br>51898 | 1642.458619 | 156.6317607 | 0.0953<br>64205 | -<br>3.39040<br>8336 | 0.0112<br>84623 | 0.1856<br>64565 | Dow<br>n |
| ADAMTS<br>2  | 5016.9<br>67385 | 9713.841776 | 320.0929936 | 0.0329<br>52255 | -<br>4.92347<br>8983 | 0.0001<br>34691 | 0.0104<br>40299 | Dow<br>n |
| ADAMTS<br>4  | 665.55<br>67061 | 1026.529051 | 304.5843612 | 0.2967<br>12851 | -<br>1.75286<br>0682 | 0.0028<br>77016 | 0.0826<br>47577 | Dow<br>n |
| ADAMTS<br>5  | 342.36<br>90494 | 587.2813525 | 97.45674624 | 0.1659<br>45583 | -<br>2.59121<br>7868 | 9.08E-<br>07    | 0.0002<br>91826 | Dow<br>n |
| ADAMTS<br>6  | 222.61<br>16307 | 388.7435286 | 56.47973276 | 0.1452<br>87905 | -<br>2.78301<br>3491 | 0.0001<br>02736 | 0.0086<br>73741 | Dow<br>n |
| ADAMTS<br>L1 | 342.79<br>01883 | 610.3159724 | 75.26440409 | 0.1233<br>20391 | -<br>3.01951<br>6731 | 0.0138<br>56525 | 0.2095<br>7266  | Dow<br>n |
| ADAMTS<br>L2 | 463.86<br>36124 | 768.4856306 | 159.2415942 | 0.2072<br>14797 | -<br>2.27080<br>1065 | 0.0007<br>60555 | 0.0346<br>25483 | Dow<br>n |
| ADAMTS<br>L5 | 1633.8<br>615   | 2550.182367 | 717.5406335 | 0.2813<br>68361 | -<br>1.82946<br>7982 | 0.0008<br>57412 | 0.0373<br>33774 | Dow<br>n |
| ADCK3        | 1845.9<br>99699 | 1044.884982 | 2647.114415 | 2.5334<br>02683 | 1.34107<br>6411      | 0.0156<br>04766 | 0.2251<br>50029 | Up       |
| ADCY2        | 28.654<br>95714 | 47.98140678 | 9.328507505 | 0.1944<br>19216 | -<br>2.36275<br>7273 | 0.0366<br>8698  | 0.3638<br>60585 | Dow<br>n |

|             |                 |             |             |                 |                      |                 |                 |      |
|-------------|-----------------|-------------|-------------|-----------------|----------------------|-----------------|-----------------|------|
| ADCY5       | 521.43<br>70078 | 821.2447351 | 221.6292806 | 0.2698<br>69956 | -<br>1.88966<br>3721 | 0.0200<br>79961 | 0.2597<br>82693 | Down |
| ADHFE1      | 155.61<br>63325 | 217.0370906 | 94.1955744  | 0.4340<br>06806 | -<br>1.20421<br>0429 | 0.0406<br>77578 | 0.3832<br>503   | Down |
| ADM         | 6370.3<br>37516 | 11622.37473 | 1118.300297 | 0.0962<br>19604 | -<br>3.37752<br>5324 | 0.0456<br>61072 | 0.4089<br>28717 | Down |
| ADORA2<br>A | 91.608<br>70103 | 49.36081085 | 133.8565912 | 2.7117<br>98872 | 1.43925<br>0181      | 0.0184<br>88562 | 0.2472<br>0819  | Up   |
| ADORA2<br>B | 484.27<br>11381 | 253.5666628 | 714.9756134 | 2.8196<br>75132 | 1.49552<br>8953      | 0.0068<br>61647 | 0.1351<br>51143 | Up   |
| ADRA1B      | 30.026<br>43238 | 55.55550607 | 4.497358695 | 0.0809<br>52529 | -<br>3.62678<br>0045 | 0.0079<br>90317 | 0.1466<br>20385 | Down |
| ADRA2A      | 110.56<br>11649 | 171.6277239 | 49.49460581 | 0.2883<br>83512 | -<br>1.79393<br>9411 | 0.0042<br>10078 | 0.1024<br>4903  | Down |
| ADRB1       | 43.700<br>73492 | 72.39735078 | 15.00411905 | 0.2072<br>46797 | -<br>2.27057<br>8291 | 0.0379<br>22592 | 0.3704<br>26665 | Down |
| AEBP1       | 21976.<br>36372 | 34746.43036 | 9206.297072 | 0.2649<br>56629 | -<br>1.91617<br>187  | 0.0002<br>16003 | 0.0147<br>34886 | Down |
| AFF2        | 88.103<br>45195 | 149.3867512 | 26.82015272 | 0.1795<br>35016 | -<br>2.47766<br>2847 | 0.0387<br>48919 | 0.3750<br>38649 | Down |
| AFF3        | 874.57<br>31203 | 1185.049073 | 564.0971681 | 0.4760<br>11653 | -<br>1.07093<br>1202 | 0.0266<br>16116 | 0.3023<br>61097 | Down |
| AGTR1       | 867.43<br>24588 | 1321.92582  | 412.9390979 | 0.3123<br>76906 | -<br>1.67864<br>0294 | 0.0354<br>96696 | 0.3570<br>33454 | Down |
| AIFM3       | 30.888<br>54727 | 10.14726927 | 51.62982527 | 5.0880<br>51171 | 2.347113<br>18       | 0.0065<br>23797 | 0.1314<br>91244 | Up   |
| AIM1L       | 107.71<br>29993 | 37.26741291 | 178.1585857 | 4.7805<br>46107 | 2.25717<br>5434      | 0.0087<br>87219 | 0.1566<br>11054 | Up   |
| AK1         | 382.55<br>1061  | 647.0417692 | 118.0603527 | 0.1824<br>61718 | -<br>2.45433<br>429  | 0.0001<br>15957 | 0.0093<br>50915 | Down |
| AK4         | 629.08<br>63992 | 867.4385528 | 390.7342457 | 0.4504<br>46022 | -<br>1.15057<br>3859 | 0.0357<br>53137 | 0.3587<br>88314 | Down |

|             |                 |             |             |                 |                      |                 |                 |          |
|-------------|-----------------|-------------|-------------|-----------------|----------------------|-----------------|-----------------|----------|
| AK5         | 130.34<br>79327 | 187.1788473 | 73.51701803 | 0.3927<br>63494 | -<br>1.34826<br>7253 | 0.0053<br>91689 | 0.1173<br>83463 | Dow<br>n |
| AKAP12      | 2725.2<br>04292 | 4565.497857 | 884.9107276 | 0.1938<br>2568  | -<br>2.36716<br>8367 | 0.0001<br>26632 | 0.0101<br>21004 | Dow<br>n |
| ALDH1A<br>1 | 2726.7<br>50141 | 4014.712881 | 1438.787401 | 0.3583<br>78655 | -<br>1.48044<br>3383 | 0.0440<br>04427 | 0.4004<br>71465 | Dow<br>n |
| ALDH1A<br>3 | 945.86<br>76173 | 1374.93716  | 516.7980749 | 0.3758<br>70323 | -<br>1.411693<br>082 | 0.0251<br>93888 | 0.2934<br>33739 | Dow<br>n |
| ALDH3B1     | 824.48<br>15372 | 1275.598203 | 373.3648715 | 0.2926<br>97866 | -<br>1.77251<br>5869 | 0.0007<br>08824 | 0.0329<br>37442 | Dow<br>n |
| ALOX12E     | 140.85<br>71065 | 14.36504069 | 267.3491722 | 18.611<br>09745 | 4.21809<br>1225      | 1.20E-<br>05    | 0.0018<br>47436 | Up       |
| ALOX15B     | 2268.9<br>55389 | 148.0526568 | 4389.858122 | 29.650<br>65414 | 4.88999<br>2028      | 0.0039<br>90598 | 0.0998<br>09354 | Up       |
| ALPK2       | 15.172<br>99639 | 26.65043589 | 3.695556897 | 0.1386<br>67784 | -<br>2.85029<br>5439 | 0.0222<br>81461 | 0.2746<br>34033 | Dow<br>n |
| ALPK3       | 1136.4<br>77548 | 2023.170297 | 249.7847988 | 0.1234<br>62073 | -<br>3.01786<br>0175 | 0.0034<br>54598 | 0.0913<br>58877 | Dow<br>n |
| ALX3        | 30.545<br>3565  | 48.50131816 | 12.58939484 | 0.2595<br>68097 | -<br>1.94581<br>5021 | 0.0083<br>69235 | 0.1511<br>08391 | Dow<br>n |
| AMPH        | 263.62<br>11565 | 499.7961458 | 27.44616718 | 0.0549<br>14724 | -<br>4.18666<br>3178 | 0.0012<br>3435  | 0.0464<br>37889 | Dow<br>n |
| ANGPT4      | 259.28<br>21304 | 406.7982845 | 111.7659762 | 0.2747<br>45446 | -<br>1.86383<br>2525 | 0.0011<br>73292 | 0.0449<br>87877 | Dow<br>n |
| ANGPTL1     | 810.86<br>28746 | 1379.598643 | 242.1271061 | 0.1755<br>05468 | -<br>2.51041<br>2112 | 0.0027<br>90951 | 0.0805<br>21626 | Dow<br>n |
| ANGPTL2     | 3395.7<br>92064 | 5812.222307 | 979.3618209 | 0.1685<br>00406 | -<br>2.56917<br>6024 | 0.0005<br>39637 | 0.0272<br>72595 | Dow<br>n |
| ANGPTL5     | 444.86<br>49918 | 879.7814583 | 9.948525304 | 0.0113<br>07951 | -<br>6.46651<br>8699 | 0.0044<br>16163 | 0.1054<br>65943 | Dow<br>n |
| ANK2        | 1609.1          | 2787.091707 | 431.19479   | 0.1547          | -                    | 0.0001          | 0.0091          | Dow      |

|              |                 |             |             |                 |                      |                 |                 |      |
|--------------|-----------------|-------------|-------------|-----------------|----------------------|-----------------|-----------------|------|
|              | 43248           |             |             | 11375           | 2.69234<br>8822      | 10849           | 94511           | n    |
| ANKRD2<br>2  | 134.59<br>98364 | 69.69049619 | 199.5091767 | 2.8627<br>88868 | 1.51742<br>1275      | 0.0203<br>485   | 0.2618<br>31984 | Up   |
| ANKRD3<br>3  | 23.563<br>66841 | 38.56262959 | 8.564707237 | 0.2220<br>98631 | -<br>2.17072<br>7595 | 0.0173<br>43341 | 0.2393<br>47196 | Down |
| ANKRD3<br>3B | 79.286<br>84692 | 25.16384458 | 133.4098493 | 5.3016<br>48117 | 2.40644<br>0918      | 0.0049<br>65286 | 0.1127<br>40832 | Up   |
| ANKRD3<br>5  | 18.081<br>20956 | 27.82227787 | 8.340141256 | 0.2997<br>64861 | -<br>1.73809<br>6818 | 0.0481<br>36745 | 0.4204<br>12522 | Down |
| ANKRD5<br>0  | 980.68<br>5295  | 1456.846194 | 504.5243958 | 0.3463<br>12739 | -<br>1.52985<br>2637 | 0.0037<br>30075 | 0.0961<br>00187 | Down |
| ANKRD6<br>3  | 19.169<br>96857 | 3.552082442 | 34.78785469 | 9.7936<br>507   | 3.29184<br>6742      | 0.0010<br>42384 | 0.0412<br>88962 | Up   |
| ANKS6        | 225.74<br>16488 | 337.006198  | 114.4770996 | 0.3396<br>8841  | -<br>1.55771<br>6099 | 0.0078<br>3831  | 0.1456<br>46579 | Down |
| ANLN         | 309.21<br>41316 | 537.4459502 | 80.98231301 | 0.1506<br>7992  | -<br>2.73044<br>0918 | 0.0432<br>9555  | 0.3966<br>29581 | Down |
| ANO1         | 832.85<br>1606  | 484.9418434 | 1180.761369 | 2.4348<br>51487 | 1.28383<br>3778      | 0.0110<br>01399 | 0.1828<br>44874 | Up   |
| ANO9         | 544.63<br>64807 | 326.5140699 | 762.7588914 | 2.3360<br>67452 | 1.22408<br>1931      | 0.0195<br>88258 | 0.2550<br>72882 | Up   |
| ANPEP        | 1255.5<br>68121 | 2040.591012 | 470.5452302 | 0.2305<br>92621 | -<br>2.116581<br>746 | 0.0294<br>78302 | 0.3206<br>94676 | Down |
| ANTXR2       | 1937.7<br>2806  | 3283.334296 | 592.1218244 | 0.1803<br>4162  | -<br>2.471195<br>712 | 0.0031<br>04714 | 0.0857<br>63545 | Down |
| ANXA6        | 3708.0<br>96435 | 5331.826848 | 2084.366022 | 0.3909<br>29053 | -<br>1.35502<br>1288 | 0.0113<br>75664 | 0.1868<br>20606 | Down |
| AOX1         | 7241.5<br>9836  | 11712.26001 | 2770.936706 | 0.2365<br>84289 | -<br>2.07957<br>3825 | 0.0007<br>14908 | 0.0331<br>07965 | Down |
| AP1M2        | 917.90<br>02545 | 436.7466663 | 1399.053843 | 3.2033<br>53227 | 1.67958<br>289       | 0.0053<br>20824 | 0.1171<br>80116 | Up   |
| AP1S2        | 821.40<br>99621 | 1214.415698 | 428.4042257 | 0.3527<br>65718 | -<br>1.50321<br>773  | 0.0056<br>31722 | 0.1205<br>65773 | Down |



|               |                 |             |             |                 |                      |                 |                 |      |
|---------------|-----------------|-------------|-------------|-----------------|----------------------|-----------------|-----------------|------|
| AP3M2         | 137.00<br>32108 | 78.43276234 | 195.5736593 | 2.4935<br>19971 | 1.31818<br>3758      | 0.0220<br>39932 | 0.2729<br>6426  | Up   |
| APBA1         | 400.41<br>45327 | 651.5543501 | 149.2747153 | 0.2291<br>05546 | -<br>2.12591<br>571  | 0.0001<br>68657 | 0.0122<br>2967  | Down |
| APOBR         | 681.11<br>99775 | 450.9161477 | 911.3238073 | 2.0210<br>49394 | 1.01510<br>4582      | 0.0495<br>52174 | 0.4273<br>84531 | Up   |
| APOL3         | 533.92<br>75152 | 334.6746153 | 733.1804151 | 2.1907<br>26101 | 1.13140<br>912       | 0.0220<br>92666 | 0.2733<br>75116 | Up   |
| AQP7          | 231.93<br>89817 | 320.124584  | 143.7533793 | 0.4490<br>54482 | -<br>1.15503<br>7603 | 0.0089<br>36645 | 0.1577<br>14947 | Down |
| AQPEP         | 388.31<br>05215 | 677.9553344 | 98.66570868 | 0.1455<br>34232 | -<br>2.78056<br>956  | 0.0114<br>35139 | 0.1872<br>02657 | Down |
| AR            | 62.994<br>06374 | 109.6258354 | 16.36229205 | 0.1492<br>55803 | -<br>2.74414<br>1075 | 0.0214<br>18196 | 0.2685<br>71055 | Down |
| ARHGAP<br>11A | 185.92<br>61779 | 273.8030588 | 98.0492971  | 0.3581<br>0154  | -<br>1.48155<br>9371 | 0.0238<br>62864 | 0.2849<br>30945 | Down |
| ARHGAP<br>20  | 179.63<br>76286 | 249.8652181 | 109.4100391 | 0.4378<br>76228 | -<br>1.19140<br>4967 | 0.0296<br>17377 | 0.3214<br>2987  | Down |
| ARHGAP<br>36  | 33.479<br>60202 | 66.95920404 | 0           | 0               | #NAME<br>?           | 0.0480<br>15347 | 0.4203<br>79738 | Down |
| ARHGAP<br>42  | 1222.4<br>11653 | 688.583287  | 1756.240018 | 2.5505<br>12119 | 1.35078<br>6956      | 0.0481<br>44981 | 0.4204<br>12522 | Up   |
| ARHGAP<br>44  | 131.21<br>14488 | 194.1093467 | 68.31355098 | 0.3519<br>33341 | -<br>1.50662<br>5897 | 0.0053<br>88103 | 0.1173<br>83463 | Down |
| ARHGAP<br>6   | 281.79<br>91745 | 445.5756348 | 118.0227143 | 0.2648<br>76948 | -<br>1.91660<br>5801 | 0.0167<br>32839 | 0.2339<br>86497 | Down |
| ARHGEF<br>10L | 1106.0<br>5712  | 1523.907247 | 688.2069929 | 0.4516<br>06877 | -<br>1.14686<br>0638 | 0.0243<br>38904 | 0.2864<br>44051 | Down |
| ARHGEF<br>17  | 2386.4<br>89713 | 3246.153673 | 1526.825752 | 0.4703<br>4919  | -<br>1.08819<br>5874 | 0.0220<br>13725 | 0.2729<br>44996 | Down |
| ARHGEF<br>25  | 1722.2<br>72261 | 2578.036544 | 866.5079778 | 0.3361<br>11596 | -<br>1.57298<br>7777 | 0.0058<br>56615 | 0.1231<br>80712 | Down |
| ARHGEF        | 528.04          | 730.8427829 | 325.2484507 | 0.4450          | -                    | 0.0079          | 0.1458          | Down |

|              |                 |             |             |                 |                      |                 |                 |          |
|--------------|-----------------|-------------|-------------|-----------------|----------------------|-----------------|-----------------|----------|
| 26           | 56168           |             |             | 32035           | 1.16801<br>8906      | 01783           | 36369           | n        |
| ARHGEF<br>40 | 1484.0<br>6148  | 2222.192513 | 745.930447  | 0.3356<br>73189 | -<br>1.57487<br>0785 | 0.0014<br>87291 | 0.0528<br>57612 | Dow<br>n |
| ARHGEF<br>5  | 848.37<br>21485 | 451.7676781 | 1244.976619 | 2.7557<br>89489 | 1.46246<br>5687      | 0.0057<br>14504 | 0.1214<br>70369 | Up       |
| ARL14EP<br>L | 97.096<br>13457 | 171.4143465 | 22.77792265 | 0.1328<br>82242 | -<br>2.911779<br>776 | 0.0336<br>14103 | 0.3452<br>52297 | Dow<br>n |
| ARMC4        | 40.440<br>45299 | 66.41468396 | 14.46622202 | 0.2178<br>16621 | -<br>2.19881<br>4051 | 0.0214<br>37067 | 0.2685<br>71055 | Dow<br>n |
| ARMCX2       | 337.41<br>71412 | 451.7910012 | 223.0432812 | 0.4936<br>86861 | -<br>1.01833<br>1845 | 0.0491<br>28342 | 0.4257<br>7107  | Dow<br>n |
| ARNT2        | 96.930<br>24238 | 147.8270669 | 46.03341789 | 0.3114<br>00469 | -<br>1.68315<br>698  | 0.0249<br>14123 | 0.2905<br>51673 | Dow<br>n |
| ARSE         | 810.67<br>75338 | 294.0625957 | 1327.292472 | 4.5136<br>39243 | 2.17429<br>1114      | 6.89E-<br>05    | 0.0065<br>91825 | Up       |
| ARSJ         | 333.40<br>67229 | 531.8498664 | 134.9635795 | 0.2537<br>62552 | -<br>1.97844<br>8909 | 0.0467<br>67905 | 0.4152<br>22343 | Dow<br>n |
| ARVCF        | 260.58<br>41937 | 357.6784293 | 163.489958  | 0.4570<br>86435 | -<br>1.12946<br>1091 | 0.0394<br>68133 | 0.3787<br>38227 | Dow<br>n |
| ASIC2        | 10.970<br>09731 | 20.15480703 | 1.785387596 | 0.0885<br>83711 | -<br>3.49681<br>4758 | 0.0041<br>81799 | 0.1021<br>75662 | Dow<br>n |
| ASIC3        | 234.30<br>54495 | 34.84004958 | 433.7708494 | 12.450<br>35109 | 3.638114<br>521      | 0.0082<br>42774 | 0.1494<br>25203 | Up       |
| ASPH         | 2257.3<br>07327 | 3111.80514  | 1402.809515 | 0.4508<br>02493 | -<br>1.14943<br>2601 | 0.0176<br>59402 | 0.2414<br>03825 | Dow<br>n |
| ASPHD2       | 212.55<br>17459 | 341.1624399 | 83.94105196 | 0.2460<br>44236 | -<br>2.02301<br>0374 | 0.0016<br>67677 | 0.0570<br>14889 | Dow<br>n |
| ASPM         | 113.94<br>47093 | 195.0671562 | 32.82226244 | 0.1682<br>61347 | -<br>2.57122<br>4297 | 0.0002<br>95637 | 0.0176<br>04115 | Dow<br>n |
| ASPN         | 7200.1<br>96089 | 13610.81282 | 789.5793625 | 0.0580<br>11184 | -<br>4.10752<br>5133 | 0.0005<br>26358 | 0.0270<br>44254 | Dow<br>n |

|              |                 |             |             |                 |                      |                 |                 |      |
|--------------|-----------------|-------------|-------------|-----------------|----------------------|-----------------|-----------------|------|
| ASRGL1       | 870.82<br>89142 | 408.2518292 | 1333.405999 | 3.2661<br>36007 | 1.70758<br>4868      | 0.0285<br>28287 | 0.3143<br>53051 | Up   |
| ASTN1        | 31.916<br>57734 | 63.32714148 | 0.506013211 | 0.0079<br>90463 | -<br>6.96750<br>5097 | 0.0143<br>70405 | 0.2144<br>9104  | Down |
| ATG4A        | 210.51<br>42809 | 297.6599357 | 123.3686262 | 0.4144<br>61643 | -<br>1.27068<br>9502 | 0.0168<br>90202 | 0.2356<br>37319 | Down |
| ATG9B        | 266.34<br>8959  | 80.64841104 | 452.0495071 | 5.6051<br>88016 | 2.48676<br>2766      | 0.0484<br>17677 | 0.4220<br>52879 | Up   |
| ATP2B4       | 1312.7<br>16699 | 1915.513342 | 709.9200567 | 0.3706<br>16086 | -<br>1.43200<br>2596 | 0.0128<br>56865 | 0.2006<br>98789 | Down |
| ATP6V0A<br>4 | 13.846<br>92728 | 23.46850323 | 4.225351324 | 0.1800<br>43494 | -<br>2.47358<br>2626 | 0.0382<br>46366 | 0.3721<br>14236 | Down |
| ATP6V0D<br>2 | 13.652<br>411   | 2.162817624 | 25.14200437 | 11.624<br>65299 | 3.539115<br>746      | 0.0039<br>01821 | 0.0992<br>45325 | Up   |
| ATP8A1       | 136.18<br>57227 | 79.05734552 | 193.3140999 | 2.4452<br>38942 | 1.28997<br>5448      | 0.0243<br>71004 | 0.2865<br>8018  | Up   |
| ATP8A2       | 42.502<br>80927 | 11.04566532 | 73.95995322 | 6.6958<br>35069 | 2.74326<br>3992      | 0.0005<br>17655 | 0.0267<br>49969 | Up   |
| ATP8B4       | 668.69<br>77523 | 1153.259201 | 184.1363041 | 0.1596<br>66018 | -<br>2.64687<br>0802 | 0.0296<br>66563 | 0.3217<br>69487 | Down |
| ATRNL1       | 351.22<br>94051 | 584.6328689 | 117.8259413 | 0.2015<br>38346 | -<br>2.31087<br>3734 | 0.0285<br>21693 | 0.3143<br>53051 | Down |
| AUNIP        | 18.424<br>54171 | 30.75144328 | 6.09764014  | 0.1982<br>87934 | -<br>2.33433<br>1208 | 0.0431<br>08369 | 0.3955<br>19288 | Down |
| AXL          | 3663.0<br>77048 | 5695.512286 | 1630.64181  | 0.2863<br>02922 | -<br>1.80438<br>57   | 0.0003<br>38324 | 0.0194<br>76328 | Down |
| AZGP1        | 4165.9<br>59019 | 1968.457252 | 6363.460786 | 3.2327<br>14746 | 1.69274<br>621       | 0.0090<br>35795 | 0.1588<br>37435 | Up   |
| B3GNT9       | 442.52<br>90149 | 730.4421827 | 154.6158471 | 0.2116<br>74313 | -<br>2.24008<br>1889 | 0.0001<br>30155 | 0.0101<br>76386 | Down |
| B4GALN<br>T1 | 76.922<br>76959 | 108.9062685 | 44.9392707  | 0.4126<br>41727 | -<br>1.27703<br>8379 | 0.0274<br>03526 | 0.3079<br>79458 | Down |
| B4GALN<br>T4 | 188.28<br>58376 | 99.89691215 | 276.6747631 | 2.7696<br>02755 | 1.46967<br>9065      | 0.0379<br>50673 | 0.3704<br>26665 | Up   |

|              |                 |             |             |                 |                      |                 |                 |      |
|--------------|-----------------|-------------|-------------|-----------------|----------------------|-----------------|-----------------|------|
| B9D2         | 194.25<br>76278 | 264.0069833 | 124.5082723 | 0.4716<br>09768 | -<br>1.08433<br>4494 | 0.0483<br>49665 | 0.4216<br>64412 | Down |
| BACE1        | 625.79<br>7434  | 885.5013932 | 366.0934749 | 0.4134<br>30716 | -<br>1.27428<br>2517 | 0.0079<br>51513 | 0.1463<br>58293 | Down |
| BAG2         | 1097.8<br>11007 | 1882.101964 | 313.5200499 | 0.1665<br>79737 | -<br>2.58571<br>5176 | 0.0339<br>43927 | 0.3478<br>14043 | Down |
| BAI1         | 13.037<br>6483  | 24.06534302 | 2.009953576 | 0.0835<br>2067  | -<br>3.58172<br>2902 | 0.0021<br>96475 | 0.0681<br>02096 | Down |
| BAI2         | 43.728<br>13211 | 68.44500002 | 19.01126419 | 0.2777<br>59722 | -<br>1.84809<br>0685 | 0.0234<br>74754 | 0.2831<br>29773 | Down |
| BAIAP2L<br>1 | 396.85<br>49424 | 145.394793  | 648.3150919 | 4.4589<br>98005 | 2.15671<br>9554      | 0.0001<br>42095 | 0.0107<br>81796 | Up   |
| BAMBI        | 280.82<br>06582 | 455.5212104 | 106.1201059 | 0.2329<br>64138 | -<br>2.10182<br>0211 | 0.0158<br>18328 | 0.2261<br>21616 | Down |
| BARX1        | 87.228<br>68362 | 156.9040603 | 17.55330692 | 0.1118<br>72866 | -<br>3.16006<br>7932 | 0.0008<br>99886 | 0.0380<br>76813 | Down |
| BATF2        | 211.03<br>76382 | 125.8985514 | 296.176725  | 2.3525<br>03042 | 1.23419<br>6588      | 0.0213<br>90401 | 0.2684<br>32361 | Up   |
| BCAN         | 4.3818<br>27289 | 8.763654577 | 0           | 0               | #NAME<br>?           | 0.0194<br>29026 | 0.2531<br>8274  | Down |
| BCAT2        | 327.63<br>17815 | 459.1281039 | 196.135459  | 0.4271<br>91142 | -<br>1.22704<br>6363 | 0.0162<br>8611  | 0.2293<br>79036 | Down |
| BCHE         | 389.98<br>15175 | 717.897672  | 62.06536302 | 0.0864<br>54331 | -<br>3.53191<br>795  | 0.0052<br>55563 | 0.1165<br>36111 | Down |
| BCL2A1       | 94.900<br>46929 | 30.40352706 | 159.3974115 | 5.2427<br>27634 | 2.39031<br>7598      | 0.0043<br>41494 | 0.1043<br>14742 | Up   |
| BCL2L14      | 41.042<br>39687 | 6.45828039  | 75.62651336 | 11.710<br>00774 | 3.54967<br>0124      | 1.34E-<br>05    | 0.0019<br>65752 | Up   |
| BCO2         | 233.00<br>12907 | 369.3088247 | 96.69375663 | 0.2618<br>23575 | -<br>1.93333<br>3091 | 0.0254<br>61432 | 0.2945<br>84159 | Down |
| BEND6        | 46.803<br>40469 | 84.11073819 | 9.496071192 | 0.1128<br>9963  | -<br>3.14688<br>7341 | 0.0023<br>52609 | 0.0709<br>84858 | Down |
| BEX2         | 381.33          | 231.4548236 | 531.2164447 | 2.2951          | 1.19856              | 0.0421          | 0.3913          | Up   |

|               |                 |             |             |                 |                      |                 |                 |      |
|---------------|-----------------|-------------|-------------|-----------------|----------------------|-----------------|-----------------|------|
|               | 56341           |             |             | 19352           | 9179                 | 94904           | 31076           |      |
| BEX5          | 108.66<br>70302 | 37.56218918 | 179.7718713 | 4.7859<br>79603 | 2.25881<br>4248      | 0.0053<br>9166  | 0.1173<br>83463 | Up   |
| BHLHE41       | 664.76<br>82454 | 348.050457  | 981.4860338 | 2.8199<br>53297 | 1.49567<br>1269      | 0.0085<br>86541 | 0.1539<br>49915 | Up   |
| BHMT2         | 106.47<br>80796 | 22.50052409 | 190.4556352 | 8.4644<br>97733 | 3.08142<br>4464      | 2.35E-<br>05    | 0.0030<br>1847  | Up   |
| BIN1          | 939.61<br>61022 | 1393.192558 | 486.0396463 | 0.3488<br>6753  | -<br>1.51924<br>8767 | 0.0037<br>51327 | 0.0961<br>40131 | Down |
| BIN2          | 344.35<br>06782 | 211.4870429 | 477.2143136 | 2.2564<br>7069  | 1.17406<br>8039      | 0.0244<br>14215 | 0.2865<br>8018  | Up   |
| BIRC3         | 1657.2<br>15824 | 819.6700828 | 2494.761564 | 3.0436<br>16714 | 1.60578<br>669       | 0.0316<br>63933 | 0.3333<br>79686 | Up   |
| BIRC5         | 159.60<br>83957 | 227.7804665 | 91.43632494 | 0.4014<br>2303  | -<br>1.31680<br>4709 | 0.0474<br>34168 | 0.4178<br>14833 | Down |
| BLNK          | 107.27<br>10305 | 56.03128897 | 158.510772  | 2.8289<br>68866 | 1.50027<br>6299      | 0.0259<br>39613 | 0.2978<br>74881 | Up   |
| BMF           | 1011.6<br>14339 | 590.4258745 | 1432.802804 | 2.4267<br>27665 | 1.27901<br>2214      | 0.0115<br>54948 | 0.1887<br>30822 | Up   |
| BMP4          | 761.68<br>53583 | 1132.475029 | 390.8956872 | 0.3451<br>69365 | -<br>1.53462<br>3667 | 0.0080<br>01852 | 0.1466<br>20385 | Down |
| BMP5          | 81.284<br>57668 | 112.9407735 | 49.62837985 | 0.4394<br>19514 | -<br>1.18632<br>9155 | 0.0133<br>83353 | 0.2063<br>15204 | Down |
| BMPER         | 69.198<br>59203 | 104.884734  | 33.5124501  | 0.3195<br>16948 | -<br>1.64603<br>5637 | 0.0177<br>17691 | 0.2416<br>35642 | Down |
| BMPR1B        | 34.986<br>77873 | 57.6374113  | 12.33614615 | 0.2140<br>30191 | -<br>2.224113<br>778 | 0.0312<br>03542 | 0.3313<br>69782 | Down |
| BNC2          | 993.84<br>07915 | 1727.796658 | 259.8849246 | 0.1504<br>14068 | -<br>2.73298<br>8585 | 0.0050<br>4177  | 0.1136<br>16722 | Down |
| BOLA-<br>DMA  | 640.22<br>0663  | 411.3271973 | 869.1141287 | 2.1129<br>50796 | 1.07925<br>9172      | 0.0332<br>11764 | 0.3430<br>48338 | Up   |
| BOLA-<br>DMB  | 1342.3<br>74791 | 836.5373256 | 1848.212257 | 2.2093<br>60181 | 1.14362<br>8633      | 0.0166<br>74239 | 0.2335<br>02855 | Up   |
| BOLA-<br>DRB2 | 125.91<br>06367 | 69.98637329 | 181.8349002 | 2.5981<br>47206 | 1.37748<br>3173      | 0.0255<br>50304 | 0.2947<br>2169  | Up   |
| BOLA-<br>DRB3 | 2691.1<br>0352  | 1526.663839 | 3855.543201 | 2.5254<br>69657 | 1.33655<br>1708      | 0.0054<br>01334 | 0.1173<br>98861 | Up   |

|              |                 |             |             |                 |                      |                 |                 |      |
|--------------|-----------------|-------------|-------------|-----------------|----------------------|-----------------|-----------------|------|
| BPIFA1       | 223.73<br>00191 | 0.3302029   | 447.1298353 | 1354.1<br>06324 | 10.4031<br>2531      | 2.51E-<br>05    | 0.0031<br>55766 | Up   |
| BPIFB1       | 661.99<br>05234 | 8.822869673 | 1315.158177 | 149.06<br>24055 | 7.21977<br>2636      | 0.0002<br>72969 | 0.0167<br>53582 | Up   |
| BRI3BP       | 555.72<br>01027 | 311.8593676 | 799.5808378 | 2.5639<br>14767 | 1.35834<br>8303      | 0.0176<br>74215 | 0.2414<br>03825 | Up   |
| BRINP1       | 22.144<br>31926 | 4.902303598 | 39.38633492 | 8.0342<br>50457 | 3.00616<br>3436      | 0.0061<br>52718 | 0.1273<br>23742 | Up   |
| BRINP2       | 28.073<br>62719 | 54.88688076 | 1.26037362  | 0.0229<br>63113 | -<br>5.44453<br>7984 | 0.0361<br>92803 | 0.3612<br>25864 | Down |
| BSP5         | 513.93<br>72243 | 69.25296084 | 958.6214878 | 13.842<br>31773 | 3.79101<br>362       | 0.0012<br>27598 | 0.0463<br>7793  | Up   |
| BTBD10       | 476.98<br>27274 | 676.0150078 | 277.9504469 | 0.4111<br>60172 | -<br>1.28222<br>7574 | 0.0324<br>17229 | 0.3384<br>95917 | Down |
| BTBD19       | 239.55<br>99807 | 342.1920059 | 136.9279555 | 0.4001<br>49487 | -<br>1.32138<br>9037 | 0.0125<br>66552 | 0.1987<br>54893 | Down |
| BTC          | 267.34<br>61298 | 75.05600736 | 459.6362522 | 6.1239<br>10242 | 2.61445<br>3138      | 0.0004<br>27553 | 0.0230<br>20013 | Up   |
| BTG2         | 1618.1<br>96768 | 2342.094699 | 894.2988373 | 0.3818<br>37181 | -<br>1.38897<br>0505 | 0.0241<br>28879 | 0.2863<br>81143 | Down |
| BVES         | 207.55<br>4844  | 409.6619647 | 5.447723415 | 0.0132<br>98094 | -<br>6.23263<br>6682 | 0.0004<br>31537 | 0.0230<br>97147 | Down |
| C10H14orf37  | 137.54<br>36872 | 60.87926467 | 214.2081097 | 3.5185<br>72553 | 1.81499<br>0262      | 0.0049<br>35119 | 0.1126<br>24686 | Up   |
| C10H15orf48  | 874.13<br>56208 | 232.0613831 | 1516.209859 | 6.5336<br>58632 | 2.70789<br>1079      | 0.0153<br>46064 | 0.2230<br>94805 | Up   |
| C10H15orf52  | 1533.6<br>85212 | 2306.07748  | 761.2929436 | 0.3301<br>24616 | -<br>1.59891<br>7375 | 0.0319<br>88697 | 0.3354<br>24339 | Down |
| C10H15orf59  | 136.30<br>5827  | 198.3000837 | 74.3115703  | 0.3747<br>4301  | -<br>1.41602<br>6526 | 0.0152<br>13766 | 0.2219<br>2778  | Down |
| C13H20orf194 | 1018.4<br>85028 | 1472.358244 | 564.611811  | 0.3834<br>74479 | -<br>1.38279<br>7527 | 0.0275<br>63762 | 0.3088<br>34346 | Down |
| C14H8orf22   | 14.333<br>8803  | 23.3448189  | 5.322941709 | 0.2280<br>13836 | -<br>2.13280<br>6724 | 0.0269<br>10398 | 0.3047<br>41613 | Down |
| C14H8orf     | 10.441          | 17.56917788 | 3.312988133 | 0.1885          | -                    | 0.0326          | 0.3397          | Down |

|                 |                 |             |             |                 |                      |                 |                 |          |
|-----------------|-----------------|-------------|-------------|-----------------|----------------------|-----------------|-----------------|----------|
| 88              | 08301           |             |             | 68193           | 2.40684<br>1743      | 56616           | 70802           | n        |
| C15H1lor<br>f52 | 84.012<br>93077 | 35.73276646 | 132.2930951 | 3.7022<br>90871 | 1.88841<br>8245      | 0.0044<br>80229 | 0.1061<br>50151 | Up       |
| C15H1lor<br>f70 | 42.033<br>7742  | 66.28023565 | 17.78731276 | 0.2683<br>65261 | -<br>1.89773<br>0162 | 0.0035<br>74397 | 0.0936<br>51879 | Dow<br>n |
| C16H1orf<br>116 | 369.69<br>42779 | 128.6546789 | 610.7338769 | 4.7470<br>78632 | 2.24703<br>9947      | 4.38E-<br>05    | 0.0047<br>9904  | Up       |
| C16H1orf<br>167 | 26.029<br>78849 | 8.94847585  | 43.11110112 | 4.8177<br>03243 | 2.26834<br>553       | 0.0163<br>00074 | 0.2293<br>79036 | Up       |
| C18H16or<br>f74 | 66.052<br>53117 | 37.15014163 | 94.9549207  | 2.5559<br>77354 | 1.35387<br>5054      | 0.0310<br>28038 | 0.3301<br>64027 | Up       |
| C18H16or<br>f87 | 371.21<br>06823 | 514.1560154 | 228.2653492 | 0.4439<br>61254 | -<br>1.17149<br>4322 | 0.0326<br>92311 | 0.3398<br>29961 | Dow<br>n |
| C1H3orf8<br>0   | 6.5927<br>90168 | 1.368330455 | 11.81724988 | 8.6362<br>5438  | 3.110405<br>738      | 0.0499<br>72902 | 0.4291<br>63853 | Up       |
| C1QL3           | 15.807<br>25687 | 30.0869132  | 1.527600538 | 0.0507<br>72923 | -<br>4.29979<br>6861 | 0.0268<br>5232  | 0.3042<br>75536 | Dow<br>n |
| C1QTNF1         | 3311.0<br>7145  | 6090.758811 | 531.3840883 | 0.0872<br>44316 | -<br>3.51879<br>5042 | 4.18E-<br>11    | 7.52E-<br>08    | Dow<br>n |
| C1QTNF2         | 214.73<br>77573 | 392.8458385 | 36.62967601 | 0.0932<br>41858 | -<br>3.42287<br>8432 | 0.0075<br>30327 | 0.1435<br>49614 | Dow<br>n |
| C1QTNF3         | 2161.5<br>90547 | 4145.000026 | 178.1810672 | 0.0429<br>86988 | -<br>4.53995<br>6156 | 0.0001<br>10284 | 0.0091<br>94511 | Dow<br>n |
| C1QTNF6         | 450.15<br>92717 | 814.3085507 | 86.00999273 | 0.1056<br>23345 | -<br>3.24299<br>9363 | 5.79E-<br>06    | 0.0012<br>10837 | Dow<br>n |
| C1QTNF7         | 326.48<br>45219 | 473.2685997 | 179.7004441 | 0.3797<br>00754 | -<br>1.39706<br>5232 | 0.0038<br>12477 | 0.0972<br>47905 | Dow<br>n |
| C1R             | 6684.8<br>04366 | 9821.815936 | 3547.792797 | 0.3612<br>15565 | -<br>1.46906<br>8032 | 0.0155<br>65025 | 0.2249<br>83412 | Dow<br>n |
| C1RL            | 206.60<br>76079 | 122.6636232 | 290.5515925 | 2.3686<br>85882 | 1.24408<br>6892      | 0.0199<br>75134 | 0.2591<br>72316 | Up       |
| C1S             | 9767.7<br>92057 | 14863.57246 | 4672.011651 | 0.3143<br>26294 | -<br>1.66966<br>5132 | 0.0135<br>76453 | 0.2079<br>06218 | Dow<br>n |

|             |                 |             |             |                 |                      |                 |                 |      |
|-------------|-----------------|-------------|-------------|-----------------|----------------------|-----------------|-----------------|------|
| C22H3orf18  | 48.543<br>26119 | 73.01978549 | 24.0667369  | 0.3295<br>91997 | -<br>1.60124<br>6884 | 0.0187<br>98206 | 0.2492<br>98034 | Down |
| C23H6orf132 | 512.28<br>07481 | 285.5609175 | 739.0005787 | 2.5878<br>91176 | 1.37177<br>6952      | 0.0121<br>30405 | 0.1940<br>87136 | Up   |
| C25H7orf61  | 33.078<br>16856 | 12.9487954  | 53.20754171 | 4.1090<br>72703 | 2.03881<br>2857      | 0.0103<br>80017 | 0.1756<br>95878 | Up   |
| C27H8orf48  | 47.175<br>72457 | 75.68977472 | 18.66167442 | 0.2465<br>54762 | -<br>2.02001<br>9975 | 0.0034<br>08321 | 0.0904<br>00692 | Down |
| C28H10orf71 | 42.519<br>83847 | 82.28970431 | 2.749972628 | 0.0334<br>18186 | -<br>4.90322<br>2775 | 0.0032<br>05947 | 0.0871<br>02502 | Down |
| C29H11orf95 | 136.80<br>02139 | 197.4345167 | 76.16591111 | 0.3857<br>78092 | -<br>1.37415<br>6879 | 0.0219<br>88698 | 0.2729<br>44996 | Down |
| C2CD4D      | 12.555<br>29368 | 2.995585528 | 22.11500183 | 7.3825<br>30602 | 2.884115<br>432      | 0.0165<br>86771 | 0.2328<br>15945 | Up   |
| C2H2orf72   | 136.80<br>28204 | 67.19795386 | 206.4076869 | 3.0716<br>36487 | 1.61900<br>749       | 0.0363<br>34474 | 0.3613<br>95383 | Up   |
| C2H2orf88   | 70.197<br>93799 | 133.5548946 | 6.840981343 | 0.0512<br>22244 | -<br>4.28708<br>5744 | 0.0022<br>36061 | 0.0687<br>36904 | Down |
| C3          | 14619.<br>71418 | 7900.002987 | 21339.42538 | 2.7011<br>92064 | 1.43359<br>6224      | 0.0234<br>10329 | 0.2826<br>15829 | Up   |
| C3H2orf54   | 646.80<br>53553 | 81.79895171 | 1211.811759 | 14.814<br>51453 | 3.88893<br>9445      | 0.0108<br>28755 | 0.1811<br>47449 | Up   |
| C4BPA       | 36.537<br>28905 | 1.392089882 | 71.68248822 | 51.492<br>71549 | 5.68629<br>6448      | 3.14E-<br>08    | 2.02E-<br>05    | Up   |
| C7          | 1901.7<br>34338 | 2832.75964  | 970.7090374 | 0.3426<br>72574 | -<br>1.54509<br>7365 | 0.0007<br>35593 | 0.0336<br>2927  | Down |
| C8H9orf152  | 303.54<br>29143 | 99.00094517 | 508.0848834 | 5.1321<br>21542 | 2.35955<br>5338      | 3.46E-<br>05    | 0.0040<br>08814 | Up   |
| C8H9orf3    | 2094.9<br>31523 | 2844.498982 | 1345.364065 | 0.4729<br>70486 | -<br>1.08017<br>7935 | 0.0346<br>7513  | 0.3524<br>94554 | Down |
| CA12        | 36.114<br>83909 | 18.66934559 | 53.56033259 | 2.8688<br>91806 | 1.52049<br>3561      | 0.0467<br>20236 | 0.4151<br>03753 | Up   |
| CA5B        | 197.90<br>72642 | 303.5037203 | 92.31080807 | 0.3041<br>50499 | -<br>1.71714<br>2722 | 0.0029<br>36638 | 0.0839<br>57964 | Down |
| CA8         | 542.64<br>73488 | 92.03727471 | 993.2574229 | 10.791<br>90389 | 3.43187<br>75        | 2.59E-<br>09    | 2.73E-<br>06    | Up   |



|              |                 |             |             |                 |                      |                 |                 |          |
|--------------|-----------------|-------------|-------------|-----------------|----------------------|-----------------|-----------------|----------|
| CACNA1<br>A  | 383.08<br>59936 | 627.2530789 | 138.9189083 | 0.2214<br>71864 | -<br>2.17480<br>4669 | 0.0002<br>94865 | 0.0176<br>04115 | Dow<br>n |
| CACNA1<br>D  | 150.81<br>26196 | 241.0712715 | 60.55396769 | 0.2511<br>86993 | -<br>1.99316<br>6337 | 0.0002<br>01518 | 0.0140<br>63107 | Dow<br>n |
| CACNA1<br>G  | 302.50<br>47578 | 570.8029084 | 34.2066071  | 0.0599<br>27177 | -<br>4.06064<br>5768 | 0.0006<br>56067 | 0.0313<br>45186 | Dow<br>n |
| CACNA2<br>D1 | 1126.3<br>94281 | 1769.535353 | 483.2532095 | 0.2730<br>96103 | -<br>1.87251<br>9366 | 0.0018<br>69456 | 0.0611<br>18937 | Dow<br>n |
| CACNA2<br>D2 | 26.541<br>56477 | 11.90784278 | 41.17528676 | 3.4578<br>29223 | 1.78986<br>6618      | 0.0400<br>81547 | 0.3810<br>46533 | Up       |
| CACNB1       | 246.81<br>52654 | 332.4679483 | 161.1625826 | 0.4847<br>46224 | -<br>1.04469<br>8434 | 0.0439<br>32559 | 0.4000<br>19848 | Dow<br>n |
| CACNB2       | 199.67<br>11562 | 350.1650494 | 49.17726299 | 0.1404<br>40238 | -<br>2.83197<br>1745 | 0.0015<br>59907 | 0.0550<br>03544 | Dow<br>n |
| CACNG4       | 19.528<br>24525 | 36.35395927 | 2.702531239 | 0.0743<br>39392 | -<br>3.74972<br>9295 | 0.0008<br>98949 | 0.0380<br>76813 | Dow<br>n |
| CADM3        | 649.68<br>30697 | 894.2336557 | 405.1324837 | 0.4530<br>49917 | -<br>1.14225<br>8079 | 0.0102<br>51735 | 0.1744<br>1528  | Dow<br>n |
| CALD1        | 28272.<br>32805 | 42557.68861 | 13986.96749 | 0.3286<br>59003 | -<br>1.60533<br>6591 | 0.0375<br>77476 | 0.3689<br>55236 | Dow<br>n |
| CALHM2       | 436.80<br>03067 | 646.3178811 | 227.2827322 | 0.3516<br>57812 | -<br>1.50775<br>5826 | 0.0013<br>08058 | 0.0484<br>40436 | Dow<br>n |
| CALU         | 7089.4<br>51609 | 11032.91664 | 3145.986574 | 0.2851<br>45504 | -<br>1.81022<br>9811 | 0.0006<br>33655 | 0.0307<br>97353 | Dow<br>n |
| CAMK1        | 589.39<br>51728 | 933.7585022 | 245.0318434 | 0.2624<br>14578 | -<br>1.93008<br>0226 | 0.0002<br>13345 | 0.0146<br>4344  | Dow<br>n |
| CAMK1D       | 485.04<br>64498 | 790.7745347 | 179.3183648 | 0.2267<br>62948 | -<br>2.14074<br>3164 | 0.0019<br>86563 | 0.0640<br>22145 | Dow<br>n |
| CAMK2N<br>1  | 228.35<br>20873 | 327.6598946 | 129.0442801 | 0.3938<br>36055 | -<br>1.34433<br>2903 | 0.0087<br>40509 | 0.1559<br>3311  | Dow<br>n |

|              |                 |             |             |                 |                      |                 |                 |          |
|--------------|-----------------|-------------|-------------|-----------------|----------------------|-----------------|-----------------|----------|
| CAMK2N<br>2  | 7.7327<br>77989 | 14.4487491  | 1.016806875 | 0.0703<br>7335  | -<br>3.82882<br>7003 | 0.0274<br>36084 | 0.3079<br>79458 | Dow<br>n |
| CAMK4        | 73.230<br>31718 | 38.92393724 | 107.5366971 | 2.7627<br>39454 | 1.46609<br>9512      | 0.0211<br>919   | 0.2674<br>34348 | Up       |
| CAMSAP<br>3  | 988.51<br>92933 | 522.7541223 | 1454.284464 | 2.7819<br>66516 | 1.47610<br>5056      | 0.0245<br>32428 | 0.2875<br>92342 | Up       |
| CAP2         | 397.75<br>09299 | 695.9388189 | 99.56304089 | 0.1430<br>62922 | -<br>2.80527<br>8282 | 0.0096<br>72088 | 0.1664<br>43219 | Dow<br>n |
| CAPN14       | 153.47<br>31896 | 1.87448345  | 305.0718958 | 162.74<br>98476 | 7.34651<br>2382      | 0.0089<br>08194 | 0.1577<br>14947 | Up       |
| CAPN2        | 4893.1<br>03335 | 7049.268329 | 2736.938341 | 0.3882<br>58499 | -<br>1.36491<br>0589 | 0.0047<br>83793 | 0.1107<br>16791 | Dow<br>n |
| CAPN3        | 32.170<br>95991 | 12.72043925 | 51.62148058 | 4.0581<br>52362 | 2.02082<br>3032      | 0.0122<br>83264 | 0.1956<br>26218 | Up       |
| CAPSL        | 28.715<br>21889 | 9.034275438 | 48.39616235 | 5.3569<br>5006  | 2.421411<br>847      | 0.0104<br>47902 | 0.1764<br>87219 | Up       |
| CASQ1        | 405.22<br>81774 | 763.8720358 | 46.58431902 | 0.0609<br>84454 | -<br>4.03541<br>4669 | 0.0142<br>7896  | 0.2136<br>26076 | Dow<br>n |
| CAST         | 5635.1<br>09346 | 7974.519169 | 3295.699523 | 0.4132<br>78776 | -<br>1.27481<br>2818 | 0.0154<br>81103 | 0.2245<br>13455 | Dow<br>n |
| CAV3         | 8.1995<br>80585 | 14.87156063 | 1.527600538 | 0.1027<br>19585 | -<br>3.28321<br>6815 | 0.0223<br>77999 | 0.2751<br>49845 | Dow<br>n |
| CBLC         | 497.12<br>84543 | 223.7424033 | 770.5145053 | 3.4437<br>57169 | 1.78398<br>3417      | 0.0010<br>97275 | 0.0429<br>7092  | Up       |
| CBLN2        | 53.246<br>29483 | 100.6588543 | 5.833735373 | 0.0579<br>55511 | -<br>4.10891<br>0327 | 0.0046<br>02929 | 0.1080<br>60676 | Dow<br>n |
| CCBE1        | 117.65<br>12439 | 207.0957214 | 28.20676635 | 0.1362<br>01589 | -<br>2.87618<br>4559 | 0.0002<br>60388 | 0.0164<br>3003  | Dow<br>n |
| CCDC109<br>B | 149.12<br>98072 | 228.9350477 | 69.32456663 | 0.3028<br>13254 | -<br>1.72349<br>9744 | 0.0065<br>64427 | 0.1314<br>91244 | Dow<br>n |
| CCDC114      | 59.805<br>14085 | 93.48614984 | 26.12413186 | 0.2794<br>43874 | -<br>1.83936<br>9547 | 0.0047<br>97874 | 0.1107<br>37156 | Dow<br>n |
| CCDC136      | 305.37<br>4027  | 550.291075  | 60.45697897 | 0.1098<br>63637 | -<br>3.18621         | 0.0002<br>65803 | 0.0165<br>87444 | Dow<br>n |

|         |                 |             |             |                 |                      |                 |                 |      |  |
|---------|-----------------|-------------|-------------|-----------------|----------------------|-----------------|-----------------|------|--|
|         |                 |             |             |                 | 4136                 |                 |                 |      |  |
| CCDC141 | 173.36<br>71514 | 287.3742666 | 59.36003622 | 0.2065<br>60027 | -<br>2.27536<br>7002 | 0.0085<br>46155 | 0.1535<br>31975 | Down |  |
| CCDC151 | 37.399<br>93244 | 57.14900066 | 17.65086421 | 0.3088<br>56918 | -<br>1.69498<br>9449 | 0.0471<br>13246 | 0.4168<br>27454 | Down |  |
| CCDC158 | 70.144<br>82696 | 28.72081422 | 111.5688397 | 3.8845<br>98773 | 1.95776<br>5595      | 0.0026<br>55976 | 0.0777<br>88942 | Up   |  |
| CCDC160 | 155.40<br>64985 | 71.82158643 | 238.9914105 | 3.3275<br>70754 | 1.73446<br>9342      | 0.0135<br>12177 | 0.2073<br>28913 | Up   |  |
| CCDC39  | 47.942<br>6905  | 16.81655944 | 79.06882156 | 4.7018<br>42958 | 2.23322<br>6354      | 0.0016<br>62263 | 0.0570<br>14889 | Up   |  |
| CCDC62  | 76.850<br>6276  | 111.6531861 | 42.04806907 | 0.3765<br>95335 | -<br>1.40891<br>2964 | 0.0377<br>66437 | 0.3695<br>06985 | Down |  |
| CCDC64  | 2331.8<br>52577 | 1021.590098 | 3642.115057 | 3.5651<br>43265 | 1.83396<br>0052      | 0.0040<br>2659  | 0.1002<br>91083 | Up   |  |
| CCDC64B | 165.23<br>26942 | 56.13895519 | 274.3264333 | 4.8865<br>61077 | 2.28881<br>9524      | 0.0002<br>35238 | 0.0153<br>82883 | Up   |  |
| CCDC67  | 158.49<br>64082 | 68.09550477 | 248.8973115 | 3.6551<br>2103  | 1.86991<br>9178      | 0.0022<br>17768 | 0.0683<br>46977 | Up   |  |
| CCDC68  | 129.25<br>61251 | 75.85306804 | 182.6591822 | 2.4080<br>65842 | 1.26787<br>4839      | 0.0320<br>61182 | 0.3356<br>31001 | Up   |  |
| CCDC69  | 645.21<br>32943 | 1042.587891 | 247.8386972 | 0.2377<br>1492  | -<br>2.07269<br>5639 | 7.87E-<br>05    | 0.0071<br>85859 | Down |  |
| CCDC8   | 715.85<br>59734 | 994.0499096 | 437.6620372 | 0.4402<br>81753 | -<br>1.18350<br>1039 | 0.0173<br>84106 | 0.2393<br>47196 | Down |  |
| CCDC80  | 19728.<br>85845 | 33730.14334 | 5727.573569 | 0.1698<br>05788 | -<br>2.55804<br>2459 | 0.0137<br>4265  | 0.2088<br>72938 | Down |  |
| CCDC85C | 549.38<br>4142  | 346.6513903 | 752.1168938 | 2.1696<br>63572 | 1.117471<br>356      | 0.0475<br>46244 | 0.4185<br>14001 | Up   |  |
| CCDC86  | 626.91<br>10076 | 393.9039041 | 859.9181111 | 2.1830<br>65723 | 1.12635<br>5564      | 0.0287<br>16954 | 0.3152<br>72881 | Up   |  |
| CCL20   | 71.980<br>32313 | 0.6604058   | 143.3002405 | 216.98<br>81616 | 7.76147<br>2524      | 0.0002<br>35057 | 0.0153<br>82883 | Up   |  |
| CCL21   | 406.32<br>08009 | 700.6549869 | 111.9866149 | 0.1598<br>31325 | -<br>2.64537<br>7909 | 3.11E-<br>07    | 0.0001<br>24148 | Down |  |
| CCL28   | 177.03<br>99816 | 41.77916864 | 312.3007945 | 7.4750<br>36116 | 2.90208<br>055       | 0.0016<br>32587 | 0.0563<br>50885 | Up   |  |

|        |                 |             |             |                 |                      |                 |                 |      |
|--------|-----------------|-------------|-------------|-----------------|----------------------|-----------------|-----------------|------|
| CCL5   | 294.80<br>74976 | 155.9391917 | 433.6758036 | 2.7810<br>57146 | 1.47563<br>339       | 0.0405<br>29512 | 0.3827<br>95278 | Up   |
| CCND2  | 183.44<br>70433 | 261.6757303 | 105.2183564 | 0.4020<br>94441 | -<br>1.31439<br>3705 | 0.0263<br>90654 | 0.3012<br>86255 | Down |
| CCNF   | 161.90<br>20019 | 236.8630528 | 86.94095113 | 0.3670<br>51552 | -<br>1.44594<br>5392 | 0.0191<br>56831 | 0.2518<br>25503 | Down |
| CCNJL  | 89.977<br>67185 | 48.28672039 | 131.6686233 | 2.7268<br>08163 | 1.44721<br>3207      | 0.0161<br>74326 | 0.2286<br>65812 | Up   |
| CCRL2  | 60.087<br>26819 | 27.37776905 | 92.79676734 | 3.3894<br>93394 | 1.76106<br>9659      | 0.0086<br>59232 | 0.1547<br>90224 | Up   |
| CD109  | 1420.8<br>63494 | 2112.413054 | 729.3139334 | 0.3452<br>51575 | -<br>1.53428<br>01   | 0.0192<br>63938 | 0.2520<br>66266 | Down |
| CD207  | 20.097<br>81916 | 2.757595272 | 37.43804305 | 13.576<br>33712 | 3.76302<br>2389      | 0.0045<br>39084 | 0.1070<br>48899 | Up   |
| CD209  | 199.92<br>21689 | 390.6011521 | 9.24318563  | 0.0236<br>64    | -<br>5.401162<br>237 | 0.0007<br>22301 | 0.0332<br>20319 | Down |
| CD244  | 207.38<br>89962 | 122.8761298 | 291.9018626 | 2.3755<br>7826  | 1.24827<br>8735      | 0.0410<br>2064  | 0.3847<br>36043 | Up   |
| CD247  | 377.08<br>55438 | 227.6546088 | 526.5164789 | 2.3127<br>86382 | 1.20963<br>2019      | 0.0187<br>44435 | 0.2489<br>52128 | Up   |
| CD248  | 4262.7<br>84829 | 7984.819467 | 540.7501922 | 0.0677<br>22282 | -<br>3.88422<br>5611 | 2.10E-<br>12    | 4.73E-<br>09    | Down |
| CD276  | 1465.8<br>22375 | 2301.917598 | 629.7271511 | 0.2735<br>66331 | -<br>1.87003<br>7413 | 0.0007<br>36803 | 0.0336<br>2927  | Down |
| CD300E | 41.357<br>05781 | 16.49316558 | 66.22095004 | 4.0150<br>53977 | 2.00541<br>9383      | 0.0093<br>38216 | 0.1620<br>93767 | Up   |
| CD3G   | 132.94<br>77785 | 82.3535841  | 183.5419729 | 2.2287<br>06557 | 1.15620<br>6677      | 0.0325<br>38233 | 0.3390<br>12187 | Up   |
| CD40   | 240.84<br>97546 | 139.2505804 | 342.4489288 | 2.4592<br>28017 | 1.29820<br>5506      | 0.0334<br>98564 | 0.3444<br>28059 | Up   |
| CD59   | 7057.5<br>51179 | 3480.900597 | 10634.20176 | 3.0550<br>1449  | 1.611179<br>223      | 0.0020<br>59531 | 0.0654<br>35602 | Up   |
| CD5L   | 70.458<br>26237 | 117.6276874 | 23.28883736 | 0.1979<br>87718 | -<br>2.33651<br>7161 | 0.0002<br>91122 | 0.0174<br>5081  | Down |
| CD7    | 184.28<br>17683 | 109.740138  | 258.8233986 | 2.3585<br>11693 | 1.23787<br>6754      | 0.0259<br>22891 | 0.2978<br>73068 | Up   |
| CD74   | 25642.          | 16559.2806  | 34726.335   | 2.0970          | 1.06839              | 0.0279          | 0.3102          | Up   |

|              |                 |             |             |                 |                      |                 |                 |      |
|--------------|-----------------|-------------|-------------|-----------------|----------------------|-----------------|-----------------|------|
|              | 8078            |             |             | 92007           | 0159                 | 9701            | 60263           |      |
| CD9          | 8465.1<br>91466 | 5515.956915 | 11414.42602 | 2.0693<br>46478 | 1.04917<br>5221      | 0.0236<br>92995 | 0.2841<br>56185 | Up   |
| CD96         | 209.01<br>96954 | 98.27115389 | 319.7682369 | 3.2539<br>37949 | 1.70218<br>674       | 0.0114<br>40567 | 0.1872<br>02657 | Up   |
| CD99         | 10908.<br>15303 | 15935.56304 | 5880.743019 | 0.3690<br>32647 | -<br>1.43817<br>9641 | 0.0020<br>09682 | 0.0645<br>35919 | Down |
| CDC20        | 136.52<br>64702 | 210.9761105 | 62.07682976 | 0.2942<br>36298 | -<br>1.76495<br>2861 | 0.0246<br>28764 | 0.2885<br>33596 | Down |
| CDC42EP<br>2 | 305.23<br>11338 | 485.6447971 | 124.8174705 | 0.2570<br>13915 | -<br>1.96008<br>1625 | 0.0001<br>28436 | 0.0101<br>33618 | Down |
| CDC42EP<br>5 | 300.33<br>14059 | 465.6065765 | 135.0562353 | 0.2900<br>65137 | -<br>1.78555<br>1188 | 0.0018<br>34362 | 0.0605<br>27213 | Down |
| CDCP1        | 942.91<br>68612 | 437.0325948 | 1448.801128 | 3.3150<br>87124 | 1.72904<br>6786      | 0.0009<br>25263 | 0.0386<br>86222 | Up   |
| CDH1         | 1588.7<br>57215 | 588.0059135 | 2589.508516 | 4.4038<br>81757 | 2.13877<br>5733      | 5.98E-<br>05    | 0.0060<br>39202 | Up   |
| CDH11        | 2754.3<br>23554 | 4705.957186 | 802.6899217 | 0.1705<br>68896 | -<br>2.55157<br>3507 | 3.07E-<br>05    | 0.0037<br>04918 | Down |
| CDH26        | 32.440<br>72706 | 6.613296122 | 58.268158   | 8.8107<br>5895  | 3.13926<br>6297      | 0.0002<br>64991 | 0.0165<br>87444 | Up   |
| CDHR4        | 92.420<br>01713 | 171.281395  | 13.55863928 | 0.0791<br>60024 | -<br>3.65908<br>4146 | 0.0273<br>99478 | 0.3079<br>79458 | Down |
| CDK14        | 989.64<br>46826 | 1388.806594 | 590.4827715 | 0.4251<br>72788 | -<br>1.23387<br>8831 | 0.0235<br>72702 | 0.2833<br>60894 | Down |
| CDKL4        | 41.926<br>39353 | 63.94350103 | 19.90928603 | 0.3113<br>57459 | -<br>1.68335<br>6251 | 0.0279<br>16722 | 0.3098<br>92852 | Down |
| CDKN1C       | 506.20<br>36206 | 728.869742  | 283.5374992 | 0.3890<br>09837 | -<br>1.36212<br>1459 | 0.0382<br>75777 | 0.3721<br>14236 | Down |
| CDKN2C       | 414.37<br>78612 | 629.897152  | 198.8585704 | 0.3157<br>00063 | -<br>1.66337<br>3548 | 0.0009<br>74003 | 0.0397<br>17673 | Down |
| CDKN3        | 28.028<br>76854 | 46.96169816 | 9.095838922 | 0.1936<br>86329 | -<br>2.36820<br>5967 | 0.0235<br>02599 | 0.2832<br>7563  | Down |

|        |                 |             |             |                 |                      |                 |                 |      |
|--------|-----------------|-------------|-------------|-----------------|----------------------|-----------------|-----------------|------|
| CDR2L  | 1083.1<br>69038 | 1545.30434  | 621.0337361 | 0.4018<br>84418 | -<br>1.31514<br>7452 | 0.0071<br>32449 | 0.1383<br>6335  | Down |
| CDS1   | 114.04<br>46094 | 48.73074687 | 179.3584719 | 3.6806<br>01743 | 1.87994<br>1652      | 0.0021<br>63666 | 0.0673<br>26013 | Up   |
| CELA3B | 12.085<br>4171  | 22.39966692 | 1.771167283 | 0.0790<br>71144 | -<br>3.66070<br>4896 | 0.0489<br>39808 | 0.4248<br>27876 | Down |
| CELF6  | 328.64<br>42811 | 141.7266804 | 515.5618819 | 3.6377<br>19309 | 1.86303<br>4227      | 0.0008<br>25976 | 0.0364<br>9517  | Up   |
| CENPA  | 99.903<br>1628  | 160.02774   | 39.77858563 | 0.2485<br>73064 | -<br>2.00825<br>8125 | 0.0173<br>95695 | 0.2393<br>47196 | Down |
| CENPF  | 352.68<br>06373 | 574.3620953 | 130.9991792 | 0.2280<br>77689 | -<br>2.13240<br>277  | 0.0054<br>37943 | 0.1176<br>7813  | Down |
| CENPM  | 215.71<br>18195 | 336.9477492 | 94.47588982 | 0.2803<br>8736  | -<br>1.83450<br>6782 | 0.0060<br>89825 | 0.1267<br>51536 | Down |
| CEP170 | 957.30<br>40981 | 1324.031147 | 590.5770495 | 0.4460<br>4468  | -<br>1.16473<br>9863 | 0.0238<br>24844 | 0.2848<br>68462 | Down |
| CEP55  | 81.415<br>31126 | 126.5182473 | 36.31237517 | 0.2870<br>12948 | -<br>1.80081<br>2271 | 0.0127<br>1284  | 0.1999<br>81294 | Down |
| CERCAM | 1639.3<br>05894 | 2968.123933 | 310.487856  | 0.1046<br>07443 | -<br>3.25694<br>2585 | 6.26E-<br>05    | 0.0062<br>14592 | Down |
| CES4A  | 8.4833<br>8933  | 1.415849309 | 15.55092935 | 10.983<br>4636  | 3.45726<br>1171      | 0.0184<br>21599 | 0.2470<br>11151 | Up   |
| CFAP99 | 10.801<br>42599 | 19.61189916 | 1.990952812 | 0.1015<br>17594 | -<br>3.30019<br>8316 | 0.0308<br>32489 | 0.3288<br>61594 | Down |
| CFH    | 2348.4<br>66465 | 3521.594543 | 1175.338387 | 0.3337<br>51763 | -<br>1.58315<br>2638 | 0.0319<br>66192 | 0.3353<br>8392  | Down |
| CFI    | 1363.7<br>75732 | 320.9524855 | 2406.598978 | 7.4983<br>02978 | 2.90656<br>4121      | 0.0224<br>61877 | 0.2753<br>4556  | Up   |
| CFL2   | 2468.8<br>19062 | 4234.831545 | 702.8065781 | 0.1659<br>58568 | -<br>2.591104<br>983 | 0.0086<br>89146 | 0.1551<br>70722 | Down |
| CFTR   | 64.916<br>04844 | 5.232506498 | 124.5995904 | 23.812<br>60117 | 4.57365<br>3317      | 0.0076<br>30975 | 0.1435<br>85359 | Up   |
| CGREF1 | 600.45          | 1051.145326 | 149.7714517 | 0.1424          | -                    | 0.0011          | 0.0442          | Down |

|        |                 |             |             |                 |                      |                 |                 |      |
|--------|-----------------|-------------|-------------|-----------------|----------------------|-----------------|-----------------|------|
|        | 8389            |             |             | 84058           | 2.811127<br>584      | 47718           | 95496           | n    |
| CHAD   | 151.22<br>59425 | 249.4476815 | 53.00420348 | 0.2124<br>86254 | -<br>2.23455<br>8579 | 0.0051<br>77237 | 0.1155<br>11474 | Down |
| CHD3   | 4455.3<br>95664 | 5971.854574 | 2938.936754 | 0.4921<br>31333 | -<br>1.02288<br>4721 | 0.0434<br>21078 | 0.3971<br>72556 | Down |
| CHI3L1 | 9825.9<br>16566 | 2943.419826 | 16708.41331 | 5.6765<br>30803 | 2.50500<br>95        | 0.0409<br>94005 | 0.3847<br>36043 | Up   |
| CHI3L2 | 707.46<br>98958 | 0.684165227 | 1414.255626 | 2067.1<br>25849 | 11.01341<br>051      | 7.14E-<br>06    | 0.0013<br>80942 | Up   |
| CHKA   | 766.51<br>25561 | 398.0934589 | 1134.931653 | 2.8509<br>17613 | 1.511426<br>348      | 0.0053<br>62066 | 0.1173<br>12844 | Up   |
| CHN1   | 588.84<br>8789  | 866.2044609 | 311.493117  | 0.3596<br>06919 | -<br>1.47550<br>7317 | 0.0144<br>36337 | 0.2150<br>8587  | Down |
| CHPF   | 1667.4<br>48939 | 2438.98247  | 895.9154092 | 0.3673<br>31631 | -<br>1.44484<br>4962 | 0.0030<br>36158 | 0.0850<br>45521 | Down |
| CHRD   | 279.94<br>12231 | 435.3710938 | 124.5113523 | 0.2859<br>8902  | -<br>1.80596<br>8338 | 0.0009<br>20486 | 0.0385<br>85331 | Down |
| CHRD1  | 1872.9<br>8033  | 2902.574034 | 843.3866255 | 0.2905<br>65069 | -<br>1.78306<br>6817 | 0.0013<br>35886 | 0.0489<br>27182 | Down |
| CHRD2  | 605.66<br>2452  | 1159.210293 | 52.11461074 | 0.0449<br>56994 | -<br>4.47531<br>06   | 3.29E-<br>05    | 0.0038<br>72765 | Down |
| CHRN1  | 208.70<br>0908  | 124.3231951 | 293.0786209 | 2.3573<br>92928 | 1.23719<br>2246      | 0.0204<br>57459 | 0.2623<br>69556 | Up   |
| CHST12 | 338.27<br>8994  | 490.0170472 | 186.5409408 | 0.3806<br>82554 | -<br>1.39333<br>9641 | 0.0285<br>6971  | 0.3146<br>1672  | Down |
| CHST9  | 44.759<br>8265  | 78.13375054 | 11.38590247 | 0.1457<br>2323  | -<br>2.77869<br>722  | 9.84E-<br>05    | 0.0084<br>24286 | Down |
| CIDEB  | 143.91<br>96106 | 234.0191167 | 53.82010455 | 0.2299<br>81658 | -<br>2.12040<br>9288 | 0.0010<br>09542 | 0.0406<br>14294 | Down |
| CIITA  | 917.10<br>10715 | 434.1190782 | 1400.083065 | 3.2251<br>12959 | 1.68934<br>9692      | 0.0022<br>87196 | 0.0694<br>77455 | Up   |
| CILP   | 6036.9<br>58733 | 11646.42844 | 427.4890258 | 0.0367<br>0559  | -<br>4.76785         | 0.0039<br>66698 | 0.0998<br>09354 | Down |

|         |                 |             |             |                 |                      |                 |                 |      |
|---------|-----------------|-------------|-------------|-----------------|----------------------|-----------------|-----------------|------|
|         |                 |             |             |                 | 6403                 |                 |                 |      |
| CIST1   | 114.38<br>82348 | 25.40429296 | 203.3721767 | 8.0054<br>2558  | 3.00097<br>81        | 0.0410<br>77306 | 0.3847<br>36043 | Up   |
| CIT     | 261.32<br>02781 | 387.7731128 | 134.8674434 | 0.3477<br>99883 | -<br>1.52367<br>0646 | 0.0192<br>31746 | 0.2520<br>32404 | Down |
| CKAP2   | 419.59<br>27553 | 615.4887431 | 223.6967675 | 0.3634<br>45749 | -<br>1.46018<br>8062 | 0.0149<br>33362 | 0.2196<br>3364  | Down |
| CKAP4   | 3863.2<br>14094 | 5400.91628  | 2325.511908 | 0.4305<br>77292 | -<br>1.21565<br>5858 | 0.0479<br>68705 | 0.4202<br>11839 | Down |
| CKB     | 2609.0<br>73423 | 4445.546062 | 772.6007835 | 0.1737<br>92099 | -<br>2.52456<br>5595 | 0.0413<br>4903  | 0.3860<br>74559 | Down |
| CKMT1B  | 71.348<br>56897 | 15.19176248 | 127.5053754 | 8.3930<br>60094 | 3.06919<br>691       | 0.0022<br>16463 | 0.0683<br>46977 | Up   |
| CLCA2   | 134.76<br>24419 | 51.63491172 | 217.889972  | 4.2198<br>18816 | 2.07718<br>1056      | 0.0200<br>75572 | 0.2597<br>82693 | Up   |
| CLCN3   | 806.83<br>76774 | 469.9481541 | 1143.727201 | 2.4337<br>30595 | 1.28316<br>9476      | 0.0126<br>54065 | 0.1999<br>63145 | Up   |
| CLDN7   | 2102.5<br>23202 | 703.8852407 | 3501.161163 | 4.9740<br>51111 | 2.31442<br>1332      | 1.87E-<br>05    | 0.0025<br>248   | Up   |
| CLEC11A | 234.11<br>82975 | 415.0454215 | 53.19117348 | 0.1281<br>57476 | -<br>2.96401<br>0459 | 2.74E-<br>07    | 0.0001<br>14785 | Down |
| CLEC4A  | 75.946<br>98329 | 26.83333532 | 125.0606313 | 4.6606<br>44298 | 2.22052<br>941       | 0.0075<br>92444 | 0.1435<br>49614 | Up   |
| CLEC4G  | 17.659<br>34291 | 35.31868582 | 0           | 0               | #NAME<br>?           | 7.06E-<br>07    | 0.0002<br>44295 | Down |
| CLEC5A  | 87.646<br>65768 | 43.339723   | 131.9535924 | 3.0446<br>33958 | 1.60626<br>879       | 0.0171<br>82768 | 0.2378<br>73536 | Up   |
| CLEC6A  | 76.918<br>26957 | 19.29186665 | 134.5446725 | 6.9741<br>65588 | 2.80202<br>0618      | 0.0327<br>77789 | 0.3403<br>25045 | Up   |
| CLEC7A  | 60.279<br>77635 | 32.82490236 | 87.73465033 | 2.6728<br>07656 | 1.41835<br>602       | 0.0261<br>46367 | 0.2994<br>84146 | Up   |
| CLIC6   | 399.20<br>69474 | 121.4697128 | 676.944182  | 5.5729<br>46261 | 2.47844<br>0242      | 0.0031<br>02167 | 0.0857<br>63545 | Up   |
| CLIP3   | 577.28<br>79359 | 859.2971315 | 295.2787403 | 0.3436<br>28216 | -<br>1.54107<br>9591 | 0.0020<br>89307 | 0.0659<br>15789 | Down |
| CLIP4   | 125.83<br>04944 | 69.93859875 | 181.7223901 | 2.5983<br>13283 | 1.37757<br>5389      | 0.0175<br>5422  | 0.2407<br>91408 | Up   |
| CLN3    | 948.40          | 582.8574261 | 1313.958071 | 2.2543          | 1.17270              | 0.0221          | 0.2733          | Up   |



|             |                 |             |             |                 |                      |                 |                 |      |
|-------------|-----------------|-------------|-------------|-----------------|----------------------|-----------------|-----------------|------|
|             | 77487           |             |             | 38733           | 4308                 | 18918           | 7767            |      |
| CLSTN2      | 62.664<br>32592 | 100.1990039 | 25.1296479  | 0.2507<br>97382 | -<br>1.99540<br>5804 | 0.0007<br>90674 | 0.0355<br>46726 | Down |
| CMYA5       | 261.45<br>15425 | 412.1288763 | 110.7742088 | 0.2687<br>85361 | -<br>1.89547<br>3529 | 0.0213<br>68774 | 0.2683<br>48233 | Down |
| CNKSRI      | 195.85<br>23788 | 93.13125602 | 298.5735017 | 3.2059<br>43036 | 1.68074<br>8792      | 0.0042<br>82404 | 0.1033<br>69771 | Up   |
| CNN1        | 26551.<br>27685 | 49904.46472 | 3198.088981 | 0.0640<br>84226 | -<br>3.96388<br>6908 | 0.0113<br>07738 | 0.1858<br>74815 | Down |
| CNPY4       | 713.70<br>73559 | 980.088477  | 447.3262349 | 0.4564<br>14135 | -<br>1.13158<br>4621 | 0.0252<br>40593 | 0.2934<br>48401 | Down |
| CNST        | 511.01<br>53029 | 716.199449  | 305.8311568 | 0.4270<br>19537 | -<br>1.22762<br>6019 | 0.0300<br>51414 | 0.3239<br>89555 | Down |
| CNTN1       | 392.23<br>33285 | 667.0623387 | 117.4043183 | 0.1760<br>02019 | -<br>2.50633<br>6117 | 0.0022<br>56752 | 0.0690<br>18991 | Down |
| CNTN2       | 27.146<br>12246 | 43.98959147 | 10.30265344 | 0.2342<br>06618 | -<br>2.09414<br>6252 | 0.0282<br>22602 | 0.3119<br>40414 | Down |
| CNTNAP<br>1 | 390.61<br>86843 | 560.6014773 | 220.6358913 | 0.3935<br>69943 | -<br>1.34530<br>805  | 0.0049<br>54029 | 0.1127<br>40832 | Down |
| COBL        | 105.00<br>17827 | 57.49316032 | 152.5104051 | 2.6526<br>70409 | 1.40744<br>5434      | 0.0262<br>29448 | 0.3000<br>53537 | Up   |
| COCH        | 242.68<br>92562 | 474.0909359 | 11.2875765  | 0.0238<br>08885 | -<br>5.39235<br>614  | 0.0018<br>12995 | 0.0602<br>64491 | Down |
| COL11A1     | 341.65<br>18288 | 649.1615078 | 34.14214984 | 0.0525<br>9423  | -<br>4.24895<br>1648 | 0.0145<br>36177 | 0.2160<br>00543 | Down |
| COL12A1     | 22067.<br>62262 | 38409.00125 | 5726.243991 | 0.1490<br>8599  | -<br>2.74578<br>3401 | 0.0002<br>22372 | 0.0149<br>77235 | Down |
| COL14A1     | 13741.<br>39938 | 25158.57757 | 2324.221195 | 0.0923<br>82854 | -<br>3.43623<br>1076 | 0.0004<br>84829 | 0.0254<br>93229 | Down |
| COL16A1     | 9082.0<br>69965 | 14345.8632  | 3818.276726 | 0.2661<br>5873  | -<br>1.90964<br>1209 | 0.0155<br>04882 | 0.2245<br>75268 | Down |

|         |                 |             |             |                 |                      |                 |                 |      |
|---------|-----------------|-------------|-------------|-----------------|----------------------|-----------------|-----------------|------|
| COL17A1 | 6232.9<br>08797 | 1965.430712 | 10500.38688 | 5.3425<br>37294 | 2.41752<br>5074      | 6.64E-<br>06    | 0.0013<br>13131 | Up   |
| COL1A1  | 47708<br>6.1951 | 938913.5906 | 15258.79951 | 0.0162<br>51548 | -<br>5.94327<br>9023 | 0.0001<br>58692 | 0.0117<br>48522 | Down |
| COL1A2  | 29399<br>4.6445 | 575249.2011 | 12740.08797 | 0.0221<br>47076 | -<br>5.49673<br>993  | 0.0001<br>59222 | 0.0117<br>48522 | Down |
| COL21A1 | 909.24<br>26446 | 1616.171164 | 202.3141252 | 0.1251<br>81125 | -<br>2.997911<br>043 | 0.0001<br>11757 | 0.0091<br>94511 | Down |
| COL23A1 | 106.94<br>96267 | 38.04381982 | 175.8554337 | 4.6224<br>44184 | 2.20865<br>5899      | 0.0011<br>10326 | 0.0433<br>1235  | Up   |
| COL27A1 | 815.58<br>35488 | 1139.597122 | 491.5699751 | 0.4313<br>54174 | -<br>1.21305<br>518  | 0.0117<br>76874 | 0.1909<br>6801  | Down |
| COL3A1  | 50242<br>5.816  | 983367.4873 | 21484.14475 | 0.0218<br>47524 | -<br>5.51638<br>6405 | 0.0001<br>13938 | 0.0092<br>71236 | Down |
| COL4A1  | 56670.<br>89142 | 78637.0259  | 34704.75695 | 0.4413<br>28452 | -<br>1.18007<br>5334 | 0.0066<br>23303 | 0.1321<br>94074 | Down |
| COL4A2  | 40792.<br>78518 | 55355.18371 | 26230.38666 | 0.4738<br>56013 | -<br>1.07747<br>9349 | 0.0119<br>11992 | 0.1922<br>92059 | Down |
| COL4A6  | 544.43<br>85471 | 892.5060077 | 196.3710866 | 0.2200<br>22145 | -<br>2.18427<br>9355 | 0.0191<br>48774 | 0.2518<br>25503 | Down |
| COL5A1  | 27298.<br>81972 | 52049.75176 | 2547.887674 | 0.0489<br>51005 | -<br>4.35251<br>7701 | 1.68E-<br>06    | 0.0005<br>02399 | Down |
| COL5A2  | 32097.<br>27609 | 60094.94244 | 4099.609741 | 0.0682<br>18881 | -<br>3.87368<br>5094 | 0.0001<br>63733 | 0.0119<br>20704 | Down |
| COL5A3  | 5038.2<br>09439 | 8850.346987 | 1226.071891 | 0.1385<br>33765 | -<br>2.85169<br>0444 | 0.0045<br>44413 | 0.1070<br>48899 | Down |
| COL6A1  | 47868.<br>70593 | 87045.92755 | 8691.484316 | 0.0998<br>49408 | -<br>3.32410<br>2319 | 0.0004<br>93912 | 0.0257<br>44959 | Down |
| COL6A2  | 41311.<br>70833 | 74195.66957 | 8427.747096 | 0.1135<br>88126 | -<br>3.138116<br>06  | 0.0007<br>88177 | 0.0355<br>23256 | Down |
| COL6A3  | 72947.          | 140280.4193 | 5615.084792 | 0.0400          | -                    | 9.09E-          | 0.0002          | Down |

|        |                 |             |             |                 |                      |                 |                 |          |
|--------|-----------------|-------------|-------------|-----------------|----------------------|-----------------|-----------------|----------|
|        | 75204           |             |             | 27573           | 4.64286<br>2029      | 07              | 91826           | n        |
| COL6A5 | 24.156<br>00822 | 39.8089709  | 8.503045534 | 0.2135<br>96216 | -<br>2.22704<br>2008 | 0.0136<br>72029 | 0.2083<br>59401 | Dow<br>n |
| COL6A6 | 589.29<br>00574 | 1136.537516 | 42.042599   | 0.0369<br>91827 | -<br>4.75664<br>9639 | 3.74E-<br>08    | 2.17E-<br>05    | Dow<br>n |
| COL7A1 | 1614.1<br>94514 | 913.8248019 | 2314.564226 | 2.5328<br>31481 | 1.34075<br>1092      | 0.0120<br>25465 | 0.1934<br>29284 | Up       |
| COL8A1 | 20737.<br>5365  | 38123.03015 | 3352.042859 | 0.0879<br>26979 | -<br>3.50755<br>0294 | 0.0311<br>8558  | 0.3313<br>69782 | Dow<br>n |
| COL8A2 | 548.17<br>75177 | 749.1626325 | 347.1924028 | 0.4634<br>40631 | -<br>1.10954<br>3562 | 0.0275<br>06808 | 0.3083<br>88361 | Dow<br>n |
| COMP   | 132.29<br>8505  | 238.1343075 | 26.46270243 | 0.1111<br>25116 | -<br>3.16974<br>3176 | 1.54E-<br>07    | 6.91E-<br>05    | Dow<br>n |
| COPZ2  | 1073.1<br>98657 | 1771.071921 | 375.3253935 | 0.2119<br>19905 | -<br>2.23840<br>8992 | 0.0004<br>89392 | 0.0256<br>39838 | Dow<br>n |
| CORO1C | 2518.5<br>75842 | 3603.349455 | 1433.802228 | 0.3979<br>08181 | -<br>1.32949<br>2533 | 0.0173<br>77374 | 0.2393<br>47196 | Dow<br>n |
| CORO2B | 249.78<br>21054 | 371.6910127 | 127.8731982 | 0.3440<br>30912 | -<br>1.53938<br>9894 | 0.0009<br>49065 | 0.0392<br>34582 | Dow<br>n |
| COX7A1 | 230.31<br>61028 | 322.729699  | 137.9025066 | 0.4273<br>00329 | -<br>1.22667<br>7667 | 0.0252<br>40213 | 0.2934<br>48401 | Dow<br>n |
| CPAMD8 | 91.302<br>51317 | 135.0982147 | 47.50681169 | 0.3516<br>4648  | -<br>1.50780<br>2317 | 0.0272<br>7469  | 0.3069<br>56512 | Dow<br>n |
| CPE    | 1626.4<br>29103 | 2715.228845 | 537.6293601 | 0.1980<br>05174 | -<br>2.33638<br>9965 | 0.0181<br>19407 | 0.2448<br>0939  | Dow<br>n |
| CPEB1  | 176.71<br>14653 | 285.841175  | 67.58175557 | 0.2364<br>31142 | -<br>2.08050<br>8017 | 0.0178<br>09861 | 0.2423<br>39933 | Dow<br>n |
| CPED1  | 371.25<br>78908 | 622.0322389 | 120.4835427 | 0.1936<br>93406 | -<br>2.36815<br>3258 | 0.0080<br>10545 | 0.1466<br>20385 | Dow<br>n |
| CPN1   | 6.2685          | 12.53714383 | 0           | 0               | #NAME                | 0.0278          | 0.3096          | Dow      |

|              |                 |             |             |                 |                      |                 |                 |          |
|--------------|-----------------|-------------|-------------|-----------------|----------------------|-----------------|-----------------|----------|
|              | 71916           |             |             |                 | ?                    | 75627           | 27791           | n        |
| CPNE2        | 405.85<br>91517 | 586.0642092 | 225.6540941 | 0.3850<br>33057 | -<br>1.37694<br>5781 | 0.0281<br>49483 | 0.3113<br>23584 | Dow<br>n |
| CPNE5        | 46.628<br>47855 | 24.09667441 | 69.16028268 | 2.8701<br>17324 | 1.521109<br>712      | 0.0253<br>49561 | 0.2941<br>48968 | Up       |
| CPOX         | 347.61<br>40896 | 217.3160181 | 477.9121612 | 2.1991<br>57547 | 1.13695<br>0962      | 0.0202<br>33955 | 0.2608<br>36709 | Up       |
| CPQ          | 360.71<br>49542 | 574.0628089 | 147.3670995 | 0.2567<br>09017 | -<br>1.96179<br>4122 | 0.0076<br>10744 | 0.1435<br>85359 | Dow<br>n |
| CPXM1        | 2698.8<br>81447 | 4726.34537  | 671.4175234 | 0.1420<br>58498 | -<br>2.81544<br>296  | 0.0345<br>3736  | 0.3517<br>20515 | Dow<br>n |
| CPZ          | 865.05<br>27426 | 1697.927832 | 32.17765276 | 0.0189<br>51131 | -<br>5.72157<br>224  | 0.0155<br>10342 | 0.2245<br>75268 | Dow<br>n |
| CR2          | 154.63<br>12964 | 281.1772859 | 28.08530679 | 0.0998<br>84693 | -<br>3.32359<br>2588 | 0.0383<br>22614 | 0.3721<br>14236 | Dow<br>n |
| CRABP2       | 600.30<br>05004 | 1123.429992 | 77.17100915 | 0.0686<br>92317 | -<br>3.86370<br>7441 | 0.0008<br>7934  | 0.0375<br>99374 | Dow<br>n |
| CRB1         | 34.570<br>59681 | 61.08728005 | 8.053913573 | 0.1318<br>42727 | -<br>2.923110<br>109 | 0.0002<br>81142 | 0.0170<br>70046 | Dow<br>n |
| CRB3         | 136.37<br>37023 | 62.34192799 | 210.4054766 | 3.3750<br>23574 | 1.75489<br>7579      | 0.0053<br>27728 | 0.1171<br>80116 | Up       |
| CREB5        | 266.61<br>65361 | 398.8289021 | 134.4041702 | 0.3369<br>97067 | -<br>1.56919<br>206  | 0.0241<br>91422 | 0.2863<br>81143 | Dow<br>n |
| CRIP1        | 1175.5<br>77513 | 1782.361662 | 568.7933642 | 0.3191<br>23428 | -<br>1.64781<br>3567 | 0.0446<br>45584 | 0.4038<br>3448  | Dow<br>n |
| CRISP3       | 1501.6<br>32077 | 25.94307656 | 2977.321078 | 114.76<br>36084 | 6.84252<br>1424      | 0.0333<br>00837 | 0.3434<br>13594 | Up       |
| CRISPLD<br>2 | 9436.9<br>75017 | 15737.72138 | 3136.228656 | 0.1992<br>80987 | -<br>2.32712<br>402  | 0.0009<br>06683 | 0.0381<br>84717 | Dow<br>n |
| CRLF1        | 2550.9<br>32163 | 4869.903989 | 231.960338  | 0.0476<br>31399 | -<br>4.39194<br>3279 | 9.67E-<br>06    | 0.0015<br>8056  | Dow<br>n |
| CRTAM        | 45.562<br>98479 | 22.99537683 | 68.13059275 | 2.9627<br>95229 | 1.56695<br>8919      | 0.0384<br>72648 | 0.3731<br>68082 | Up       |

|                |                 |             |             |                 |                      |                 |                 |      |
|----------------|-----------------|-------------|-------------|-----------------|----------------------|-----------------|-----------------|------|
| CRTAP          | 1711.5<br>44606 | 2471.045482 | 952.0437304 | 0.3852<br>79728 | -<br>1.37602<br>1818 | 0.0066<br>92244 | 0.1329<br>28964 | Down |
| CSGALN<br>ACT1 | 638.96<br>67619 | 947.3374605 | 330.5960633 | 0.3489<br>73916 | -<br>1.51880<br>8888 | 0.0232<br>19133 | 0.2808<br>55371 | Down |
| CSGALN<br>ACT2 | 723.78<br>51155 | 1015.939392 | 431.6308388 | 0.4248<br>58847 | -<br>1.23494<br>4488 | 0.0233<br>27955 | 0.2819<br>26484 | Down |
| CSRP1          | 17817.<br>11205 | 29723.96237 | 5910.261722 | 0.1988<br>38286 | -<br>2.33033<br>2525 | 0.0320<br>64397 | 0.3356<br>31001 | Down |
| CSRP2          | 900.44<br>70995 | 1246.852226 | 554.0419726 | 0.4443<br>52555 | -<br>1.17022<br>3311 | 0.0169<br>99338 | 0.2362<br>13617 | Down |
| CST3           | 16655.<br>33708 | 29701.36776 | 3609.306397 | 0.1215<br>19872 | -<br>3.04073<br>5844 | 0.0035<br>3748  | 0.0931<br>73424 | Down |
| CTGF           | 19689.<br>00925 | 34259.54367 | 5118.474838 | 0.1494<br>0289  | -<br>2.74272<br>0038 | 0.0272<br>57528 | 0.3069<br>56512 | Down |
| CTHRC1         | 703.02<br>74514 | 1367.134474 | 38.92042918 | 0.0284<br>68618 | -<br>5.13448<br>3727 | 0.0015<br>69377 | 0.0550<br>13856 | Down |
| CTLA4          | 7.6491<br>14274 | 1.49958676  | 13.79864179 | 9.2016<br>29513 | 3.20188<br>937       | 0.0383<br>15967 | 0.3721<br>14236 | Up   |
| CTSC           | 4326.3<br>63162 | 2097.468472 | 6555.257852 | 3.1253<br>18897 | 1.64400<br>3405      | 0.0052<br>37739 | 0.1164<br>28019 | Up   |
| CTSK           | 5418.3<br>56271 | 7955.457122 | 2881.25542  | 0.3621<br>73459 | -<br>1.46524<br>7271 | 0.0435<br>26165 | 0.3978<br>9588  | Down |
| CTSV           | 1898.3<br>54256 | 2815.792225 | 980.9162864 | 0.3483<br>62453 | -<br>1.52133<br>8959 | 0.0391<br>21976 | 0.3772<br>28151 | Down |
| CTSW           | 424.44<br>56536 | 218.1301702 | 630.7611369 | 2.8916<br>73061 | 1.53190<br>4447      | 0.0032<br>66083 | 0.0884<br>54783 | Up   |
| CWH43          | 23.283<br>0842  | 3.019344955 | 43.54682344 | 14.422<br>60626 | 3.85025<br>9987      | 0.0174<br>98545 | 0.2405<br>78232 | Up   |
| CX3CL1         | 1530.8<br>11431 | 574.3812847 | 2487.241577 | 4.3302<br>97039 | 2.114465<br>991      | 5.44E-<br>05    | 0.0056<br>52549 | Up   |
| CXADR          | 222.69<br>65159 | 71.62388096 | 373.7691509 | 5.2184<br>98996 | 2.38363<br>4902      | 0.0131<br>4655  | 0.2041<br>53801 | Up   |
| CXCL13         | 12.373<br>20193 | 3.108732535 | 21.63767133 | 6.9602<br>87219 | 2.79914<br>6841      | 0.0225<br>09897 | 0.2755<br>10556 | Up   |

|         |                 |             |             |                 |                      |                 |                 |      |
|---------|-----------------|-------------|-------------|-----------------|----------------------|-----------------|-----------------|------|
| CXCL17  | 154.57<br>05031 | 26.49236845 | 282.6486377 | 10.669<br>05884 | 3.41536<br>101       | 0.0145<br>79843 | 0.2162<br>20103 | Up   |
| CXCL3   | 2238.6<br>28644 | 683.2260794 | 3794.031209 | 5.5531<br>12394 | 2.47329<br>6596      | 3.53E-<br>06    | 0.0008<br>14459 | Up   |
| CXCR4   | 505.22<br>89813 | 291.0186122 | 719.4393504 | 2.4721<br>42056 | 1.30576<br>1647      | 0.0092<br>74558 | 0.1614<br>56323 | Up   |
| CYB561  | 876.08<br>57422 | 461.7819537 | 1290.389531 | 2.7943<br>69768 | 1.48252<br>294       | 0.0078<br>39954 | 0.1456<br>46579 | Up   |
| CYB5R2  | 70.773<br>09228 | 125.1140072 | 16.4321774  | 0.1313<br>37632 | -<br>2.92864<br>7748 | 0.0023<br>05478 | 0.0697<br>96997 | Down |
| CYP11A1 | 1190.2<br>63961 | 45.33283502 | 2335.195086 | 51.512<br>22255 | 5.68684<br>2883      | 0.0009<br>54358 | 0.0392<br>37474 | Up   |
| CYP1B1  | 65.397<br>99366 | 33.58596696 | 97.21002037 | 2.8943<br>64199 | 1.53324<br>6468      | 0.0137<br>52186 | 0.2088<br>72938 | Up   |
| CYP24A1 | 34.239<br>18678 | 5.533299842 | 62.94507371 | 11.375<br>68458 | 3.50788<br>1464      | 0.0042<br>31823 | 0.1025<br>61821 | Up   |
| CYP27C1 | 7.7308<br>66703 | 0.684165227 | 14.77756818 | 21.599<br>41428 | 4.43292<br>0285      | 0.0080<br>37129 | 0.1468<br>81794 | Up   |
| CYP4F2  | 7.9257<br>72685 | 1.698533355 | 14.15301201 | 8.3324<br>89895 | 3.05874<br>7663      | 0.0472<br>46303 | 0.4173<br>03667 | Up   |
| DAAM2   | 1467.3<br>89548 | 2319.503182 | 615.2759145 | 0.2652<br>6194  | -<br>1.91451<br>0402 | 2.77E-<br>05    | 0.0034<br>31964 | Down |
| DAB2    | 2369.5<br>67105 | 3917.561056 | 821.5731553 | 0.2097<br>15469 | -<br>2.25349<br>4812 | 0.0027<br>41637 | 0.0797<br>78091 | Down |
| DACT1   | 787.03<br>52977 | 1085.665414 | 488.4051814 | 0.4498<br>67128 | -<br>1.15242<br>9144 | 0.0301<br>24701 | 0.3240<br>87515 | Down |
| DACT2   | 213.16<br>39521 | 411.9818044 | 14.34609972 | 0.0348<br>22168 | -<br>4.84385<br>0151 | 1.83E-<br>13    | 1.22E-<br>09    | Down |
| DACT3   | 358.24<br>31207 | 622.6853077 | 93.80093367 | 0.1506<br>39388 | -<br>2.73082<br>9051 | 0.0162<br>21198 | 0.2291<br>48319 | Down |
| DBN1    | 2880.9<br>52258 | 4530.096721 | 1231.807795 | 0.2719<br>16445 | -<br>1.87876<br>4691 | 0.0001<br>61276 | 0.0118<br>37626 | Down |
| DCHS1   | 1904.7<br>87841 | 2661.264634 | 1148.311048 | 0.4314<br>90741 | -<br>1.21259<br>8494 | 0.0240<br>93038 | 0.2863<br>81143 | Down |
| DCLK1   | 1686.9<br>93336 | 3186.498689 | 187.4879834 | 0.0588<br>38243 | -<br>4.08710         | 0.0002<br>46483 | 0.0158<br>87118 | Down |

|             |                 |             |             |                 |                      |                 |                 |      |  |
|-------------|-----------------|-------------|-------------|-----------------|----------------------|-----------------|-----------------|------|--|
|             |                 |             |             |                 | 203                  |                 |                 |      |  |
| DCLK2       | 285.32<br>95368 | 388.4473592 | 182.2117144 | 0.4690<br>76981 | -<br>1.09210<br>3391 | 0.0468<br>95157 | 0.4156<br>31148 | Down |  |
| DCN         | 63743.<br>96298 | 119303.2394 | 8184.686529 | 0.0686<br>04059 | -<br>3.86556<br>2244 | 0.0041<br>18929 | 0.1014<br>37129 | Down |  |
| DCUNID<br>3 | 596.84<br>16987 | 802.4111756 | 391.2722218 | 0.4876<br>20604 | -<br>1.03616<br>9009 | 0.0464<br>92502 | 0.4141<br>29347 | Down |  |
| DDAH2       | 1702.8<br>99186 | 2650.512276 | 755.2860949 | 0.2849<br>58535 | -<br>1.811176<br>091 | 0.0001<br>518   | 0.0114<br>21844 | Down |  |
| DDIT4L      | 274.85<br>08764 | 473.5349096 | 76.16684325 | 0.1608<br>47367 | -<br>2.63623<br>5778 | 0.0376<br>97043 | 0.3692<br>2981  | Down |  |
| DDR1        | 3071.4<br>21835 | 1718.206159 | 4424.637511 | 2.5751<br>49372 | 1.36465<br>6118      | 0.0085<br>65628 | 0.1537<br>2824  | Up   |  |
| DDR2        | 4806.1<br>23402 | 6430.889885 | 3181.356919 | 0.4946<br>9933  | -<br>1.01537<br>6148 | 0.0390<br>71557 | 0.3769<br>44108 | Down |  |
| DEFB4A      | 61.166<br>4162  | 1.038127555 | 121.2947048 | 116.83<br>98857 | 6.86838<br>9042      | 0.0003<br>82606 | 0.0213<br>0154  | Up   |  |
| DEFB5       | 90.526<br>03947 | 0.728859017 | 180.3232199 | 247.40<br>48007 | 7.95072<br>9685      | 2.32E-<br>06    | 0.0005<br>94874 | Up   |  |
| DEGS2       | 82.980<br>4051  | 9.036704518 | 156.9241057 | 17.365<br>19163 | 4.118126<br>426      | 0.0001<br>91856 | 0.0135<br>83244 | Up   |  |
| DENND2<br>A | 576.75<br>82851 | 1005.261173 | 148.2553974 | 0.1474<br>79482 | -<br>2.76141<br>3837 | 9.22E-<br>08    | 4.73E-<br>05    | Down |  |
| DENND2<br>D | 945.70<br>18269 | 452.5871956 | 1438.816458 | 3.1790<br>92276 | 1.66861<br>4893      | 0.0191<br>08846 | 0.2515<br>62502 | Up   |  |
| DEPDC1      | 72.075<br>34027 | 110.373394  | 33.77728657 | 0.3060<br>27434 | -<br>1.70826<br>7103 | 0.0271<br>72874 | 0.3065<br>55704 | Down |  |
| DEPDC7      | 107.48<br>70902 | 66.00825827 | 148.9659222 | 2.2567<br>77047 | 1.17426<br>3898      | 0.0489<br>45966 | 0.4248<br>27876 | Up   |  |
| DES         | 72681.<br>926   | 142468.2969 | 2895.555119 | 0.0203<br>24207 | -<br>5.62065<br>7146 | 0.0016<br>44187 | 0.0566<br>42558 | Down |  |
| DFNB59      | 34.758<br>72216 | 56.62626423 | 12.89118009 | 0.2276<br>53727 | -<br>2.13508<br>7017 | 0.0179<br>98744 | 0.2439<br>12138 | Down |  |
| DGKG        | 130.94          | 251.0000446 | 10.88466971 | 0.0433          | -                    | 0.0043          | 0.1043          | Down |  |

|        |                 |             |             |                 |                      |                 |                 |      |
|--------|-----------------|-------------|-------------|-----------------|----------------------|-----------------|-----------------|------|
|        | 23572           |             |             | 6521            | 4.52731<br>8085      | 53307           | 80703           | n    |
| DHRS13 | 171.13<br>33419 | 85.28673348 | 256.9799502 | 3.0131<br>29238 | 1.59126<br>2554      | 0.0070<br>0544  | 0.1372<br>31843 | Up   |
| DIP2C  | 1321.6<br>11479 | 1844.376425 | 798.846533  | 0.4331<br>25539 | -<br>1.20714<br>2852 | 0.0119<br>4535  | 0.1924<br>84974 | Down |
| DKK2   | 117.16<br>19271 | 185.421152  | 48.90270215 | 0.2637<br>3853  | -<br>1.92281<br>974  | 0.0170<br>73357 | 0.2369<br>06001 | Down |
| DKK3   | 2221.3<br>70841 | 3679.633242 | 763.1084404 | 0.2073<br>87093 | -<br>2.26960<br>1988 | 0.0139<br>85206 | 0.2108<br>08596 | Down |
| DLC1   | 1342.4<br>77312 | 1889.329765 | 795.624859  | 0.4211<br>1487  | -<br>1.24771<br>4275 | 0.0077<br>20676 | 0.1443<br>34849 | Down |
| DLGAP1 | 74.284<br>0733  | 39.09064921 | 109.4774974 | 2.8006<br>05761 | 1.48573<br>8911      | 0.0468<br>37267 | 0.4153<br>2277  | Up   |
| DLGAP4 | 1423.0<br>46551 | 1906.844942 | 939.2481593 | 0.4925<br>66616 | -<br>1.02160<br>9245 | 0.0367<br>87876 | 0.3642<br>93155 | Down |
| DLGAP5 | 86.352<br>09698 | 128.4805925 | 44.22360144 | 0.3442<br>04526 | -<br>1.53866<br>2027 | 0.0364<br>99571 | 0.3626<br>36342 | Down |
| DLK2   | 435.07<br>68722 | 124.0609099 | 746.0928345 | 6.0139<br>23605 | 2.58830<br>6541      | 0.0005<br>64814 | 0.0282<br>14009 | Up   |
| DMBT1  | 79.245<br>96495 | 27.05245335 | 131.4394765 | 4.8586<br>89703 | 2.28056<br>7299      | 0.0140<br>9506  | 0.2114<br>02383 | Up   |
| DMD    | 1189.2<br>53328 | 1701.506051 | 677.0006055 | 0.3978<br>83161 | -<br>1.32958<br>3253 | 0.0234<br>16426 | 0.2826<br>15829 | Down |
| DMGDH  | 161.49<br>51665 | 49.69759614 | 273.2927369 | 5.4991<br>13803 | 2.45919<br>9143      | 6.94E-<br>05    | 0.0066<br>01331 | Up   |
| DMKN   | 8.6992<br>98916 | 16.89258462 | 0.506013211 | 0.0299<br>54754 | -<br>5.06107<br>122  | 0.0048<br>03146 | 0.1107<br>37156 | Down |
| DMP1   | 31.399<br>73701 | 2.757595272 | 60.04187875 | 21.773<br>27448 | 4.44448<br>6485      | 0.0002<br>00847 | 0.0140<br>63107 | Up   |
| DMPK   | 4307.0<br>41833 | 8009.100723 | 604.982943  | 0.0755<br>36938 | -<br>3.72667<br>3891 | 0.0038<br>92376 | 0.0991<br>45334 | Down |
| DMRT2  | 431.09<br>05007 | 747.7030906 | 114.4779107 | 0.1531<br>06109 | -<br>2.70739<br>6249 | 6.70E-<br>05    | 0.0065<br>10633 | Down |



|         |                 |             |             |                 |                      |                 |                 |      |
|---------|-----------------|-------------|-------------|-----------------|----------------------|-----------------|-----------------|------|
| DMRTA1  | 15.693<br>7531  | 4.387675409 | 26.99983078 | 6.1535<br>6157  | 2.62142<br>1658      | 0.0143<br>81476 | 0.2144<br>9104  | Up   |
| DMTN    | 60.348<br>7055  | 86.10625025 | 34.59116076 | 0.4017<br>26479 | -<br>1.31571<br>4537 | 0.0133<br>88747 | 0.2063<br>15204 | Down |
| DMXL2   | 252.68<br>06657 | 379.4219632 | 125.9393683 | 0.3319<br>24297 | -<br>1.59107<br>3857 | 0.0044<br>46197 | 0.1060<br>2655  | Down |
| DNAH1   | 134.95<br>13903 | 236.4707508 | 33.43202972 | 0.1413<br>79133 | -<br>2.82235<br>8896 | 8.08E-<br>06    | 0.0014<br>10613 | Down |
| DNAJA4  | 721.18<br>73734 | 1072.337774 | 370.036973  | 0.3450<br>75015 | -<br>1.53501<br>8076 | 0.0455<br>75086 | 0.4087<br>66466 | Down |
| DNAJB5  | 337.53<br>7863  | 586.5016774 | 88.57404854 | 0.1510<br>20964 | -<br>2.72717<br>9266 | 0.0157<br>4602  | 0.2253<br>90999 | Down |
| DNAJC6  | 121.30<br>41092 | 43.4365962  | 199.1716223 | 4.5853<br>41387 | 2.19702<br>9149      | 0.0009<br>04165 | 0.0381<br>68083 | Up   |
| DNM1    | 1148.4<br>07533 | 2042.635203 | 254.1798621 | 0.1244<br>37228 | -<br>3.00650<br>9935 | 0.0016<br>0763  | 0.0559<br>18788 | Down |
| DPT     | 4062.9<br>28243 | 7197.696187 | 928.1602997 | 0.1289<br>52414 | -<br>2.95508<br>9312 | 0.0004<br>31554 | 0.0230<br>97147 | Down |
| DPY19L2 | 36.757<br>27682 | 68.49218097 | 5.02237267  | 0.0733<br>27679 | -<br>3.76949<br>8312 | 0.0136<br>03504 | 0.2080<br>20251 | Down |
| DPYSL3  | 4842.1<br>52619 | 8078.055525 | 1606.249714 | 0.1988<br>41133 | -<br>2.330311<br>865 | 0.0020<br>76108 | 0.0656<br>14492 | Down |
| DRAM1   | 695.25<br>06588 | 374.4303301 | 1016.070988 | 2.7136<br>44985 | 1.44023<br>1991      | 0.0061<br>47111 | 0.1273<br>23742 | Up   |
| DRP2    | 13.780<br>0661  | 27.5601322  | 0           | 0               | #NAME<br>?           | 1.10E-<br>05    | 0.0017<br>41648 | Down |
| DSC3    | 1079.3<br>34836 | 507.8306032 | 1650.839069 | 3.2507<br>67202 | 1.70078<br>0244      | 0.0009<br>55681 | 0.0392<br>37474 | Up   |
| DSE     | 746.65<br>74556 | 1114.469096 | 378.8458156 | 0.3399<br>33891 | -<br>1.55667<br>3893 | 0.0049<br>62924 | 0.1127<br>40832 | Down |
| DSEL    | 914.59<br>7485  | 1421.565115 | 407.6298548 | 0.2867<br>47227 | -<br>1.80214<br>856  | 0.0376<br>50464 | 0.3689<br>74545 | Down |
| DSG2    | 1047.6          | 311.0948553 | 1784.252809 | 5.7353          | 2.51989              | 2.91E-          | 0.0006          | Up   |

|       |                 |             |             |                 |                      |                 |                 |      |
|-------|-----------------|-------------|-------------|-----------------|----------------------|-----------------|-----------------|------|
|       | 73832           |             |             | 97995           | 3602                 | 06              | 98327           |      |
| DSG3  | 476.34<br>27443 | 58.17051651 | 894.5149721 | 15.377<br>46312 | 3.94274<br>561       | 9.00E-<br>06    | 0.0015<br>26844 | Up   |
| DSP   | 5334.1<br>36359 | 1878.763723 | 8789.508996 | 4.6783<br>47195 | 2.22599<br>8933      | 0.0009<br>76937 | 0.0397<br>47198 | Up   |
| DST   | 8477.2<br>93734 | 11382.04664 | 5572.540828 | 0.4895<br>90405 | -<br>1.03035<br>281  | 0.0350<br>44949 | 0.3542<br>51441 | Down |
| DSTN  | 10056.<br>82954 | 16333.26545 | 3780.393628 | 0.2314<br>53633 | -<br>2.111204<br>887 | 0.0428<br>29697 | 0.3941<br>39019 | Down |
| DTX1  | 476.76<br>50598 | 685.1907647 | 268.339355  | 0.3916<br>27221 | -<br>1.35244<br>7049 | 0.0044<br>14922 | 0.1054<br>65943 | Down |
| DTX4  | 941.02<br>32851 | 1390.821163 | 491.225407  | 0.3531<br>90921 | -<br>1.50147<br>9839 | 0.0228<br>41392 | 0.2784<br>79148 | Down |
| DUPD1 | 5.4097<br>21886 | 0           | 10.81944377 | Inf             | Inf                  | 0.0062<br>95265 | 0.1286<br>45163 | Up   |
| DUSP8 | 109.08<br>81483 | 149.5174098 | 68.65888689 | 0.4592<br>03293 | -<br>1.12279<br>5108 | 0.0187<br>72317 | 0.2491<br>38432 | Down |
| DUSP9 | 8.6190<br>1565  | 16.01565921 | 1.222372091 | 0.0763<br>23558 | -<br>3.711727<br>767 | 0.0331<br>50418 | 0.3430<br>0573  | Down |
| DZIP1 | 972.83<br>45821 | 1539.320022 | 406.3491423 | 0.2639<br>79638 | -<br>1.92150<br>1442 | 0.0098<br>61373 | 0.1690<br>53452 | Down |
| EBF1  | 1077.3<br>28506 | 1532.139885 | 622.5171277 | 0.4063<br>05673 | -<br>1.29936<br>2585 | 0.0030<br>1335  | 0.0850<br>45521 | Down |
| EBF2  | 251.65<br>81334 | 451.9579224 | 51.35834449 | 0.1136<br>35235 | -<br>3.13751<br>7859 | 0.0278<br>25243 | 0.3096<br>27791 | Down |
| ECM1  | 5526.2<br>90227 | 9779.193593 | 1273.386862 | 0.1302<br>13892 | -<br>2.94104<br>4718 | 0.0108<br>20223 | 0.1811<br>47449 | Down |
| ECM2  | 7762.2<br>60134 | 13328.30762 | 2196.212644 | 0.1647<br>78058 | -<br>2.60140<br>3952 | 0.0005<br>31657 | 0.0272<br>38724 | Down |
| EDA   | 173.22<br>79689 | 237.8983005 | 108.5576372 | 0.4563<br>19516 | -<br>1.13188<br>374  | 0.0315<br>58115 | 0.3333<br>79686 | Down |
| EDAR  | 107.88          | 40.14705541 | 175.6176215 | 4.3743          | 2.12907              | 0.0128          | 0.2005          | Up   |

|         |                 |             |             |                 |                      |                 |                 |          |
|---------|-----------------|-------------|-------------|-----------------|----------------------|-----------------|-----------------|----------|
|         | 23384           |             |             | 5871            | 153                  | 1025            | 50792           |          |
| EFEMP1  | 3749.4<br>64606 | 5846.162974 | 1652.766238 | 0.2827<br>09573 | -<br>1.82260<br>7359 | 0.0114<br>06478 | 0.1869<br>85142 | Dow<br>n |
| EFEMP2  | 2286.8<br>55337 | 4027.60792  | 546.1027532 | 0.1355<br>8985  | -<br>2.88267<br>8911 | 0.0011<br>43798 | 0.0442<br>95496 | Dow<br>n |
| EFNA1   | 1577.8<br>00695 | 820.6900378 | 2334.911352 | 2.8450<br>58724 | 1.50845<br>8431      | 0.0033<br>015   | 0.0890<br>11076 | Up       |
| EFNA4   | 183.55<br>32596 | 116.6267107 | 250.4798084 | 2.1477<br>05332 | 1.10279<br>6067      | 0.0490<br>10583 | 0.4251<br>60309 | Up       |
| EGFLAM  | 530.69<br>66214 | 779.4762474 | 281.9169955 | 0.3616<br>74902 | -<br>1.46723<br>4607 | 0.0108<br>58811 | 0.1814<br>81405 | Dow<br>n |
| EGR3    | 141.95<br>76041 | 235.3882674 | 48.52694072 | 0.2061<br>57007 | -<br>2.27818<br>4597 | 0.0162<br>36045 | 0.2291<br>78021 | Dow<br>n |
| ELF3    | 599.83<br>26543 | 101.8605848 | 1097.804724 | 10.777<br>5223  | 3.42995<br>3642      | 0.0005<br>9958  | 0.0295<br>40385 | Up       |
| ELMO3   | 849.46<br>64435 | 310.9902698 | 1387.942617 | 4.4629<br>77629 | 2.15800<br>6575      | 9.35E-<br>05    | 0.0081<br>27365 | Up       |
| ELN     | 59291.<br>3589  | 114551.2398 | 4031.478031 | 0.0351<br>93666 | -<br>4.82854<br>0402 | 0.0068<br>97534 | 0.1357<br>0935  | Dow<br>n |
| ELOVL5  | 330.57<br>00556 | 113.5153507 | 547.6247605 | 4.8242<br>35288 | 2.27030<br>0272      | 0.0162<br>84578 | 0.2293<br>79036 | Up       |
| EMILIN1 | 3357.0<br>11432 | 5332.49563  | 1381.527234 | 0.2590<br>7705  | -<br>1.94854<br>6875 | 0.0410<br>58922 | 0.3847<br>36043 | Dow<br>n |
| EMILIN2 | 1470.7<br>18626 | 2412.52675  | 528.9105024 | 0.2192<br>35083 | -<br>2.18944<br>9411 | 5.79E-<br>05    | 0.0059<br>13394 | Dow<br>n |
| EML1    | 366.16<br>33751 | 557.3844476 | 174.9423027 | 0.3138<br>62906 | -<br>1.67179<br>356  | 0.0006<br>98235 | 0.0328<br>63302 | Dow<br>n |
| EML5    | 337.93<br>0768  | 222.4669073 | 453.3946286 | 2.0380<br>31787 | 1.02717<br>6553      | 0.0426<br>62777 | 0.3938<br>42261 | Up       |
| EMP1    | 7970.1<br>33448 | 11781.13887 | 4159.128026 | 0.3530<br>32765 | -<br>1.50212<br>601  | 0.0017<br>86779 | 0.0598<br>7193  | Dow<br>n |
| EMP3    | 1395.5<br>22833 | 2323.900852 | 467.1448138 | 0.2010<br>17532 | -<br>2.31460<br>6762 | 7.54E-<br>06    | 0.0013<br>95796 | Dow<br>n |
| EMX2    | 300.10          | 570.0193248 | 30.19946196 | 0.0529          | -                    | 0.0070          | 0.1377          | Dow      |

|        |                 |             |             |                 |                      |                 |                 |          |
|--------|-----------------|-------------|-------------|-----------------|----------------------|-----------------|-----------------|----------|
|        | 93934           |             |             | 79716           | 4.23841<br>6079      | 52574           | 05147           | n        |
| EN1    | 82.463<br>91676 | 138.1172417 | 26.81059182 | 0.1941<br>14735 | -<br>2.36501<br>8457 | 0.0396<br>55805 | 0.3798<br>25173 | Dow<br>n |
| ENDOU  | 20.704<br>42922 | 8.097598648 | 33.31125978 | 4.1137<br>20775 | 2.04044<br>3872      | 0.0319<br>5184  | 0.3353<br>8392  | Up       |
| ENPEP  | 180.50<br>08235 | 284.533182  | 76.46846504 | 0.2687<br>50606 | -<br>1.89566<br>0088 | 0.0005<br>75734 | 0.0286<br>79846 | Dow<br>n |
| ENPPI  | 6738.9<br>64539 | 12966.55928 | 511.3697949 | 0.0394<br>37586 | -<br>4.66428<br>4949 | 0.0050<br>04544 | 0.1132<br>03416 | Dow<br>n |
| ENTPD1 | 552.83<br>2302  | 781.8481032 | 323.8165008 | 0.4141<br>68045 | -<br>1.271711<br>846 | 0.0199<br>27914 | 0.2589<br>33287 | Dow<br>n |
| ENTPD2 | 2497.1<br>15245 | 647.4294139 | 4346.801076 | 6.7139<br>38204 | 2.74715<br>9258      | 0.0328<br>13977 | 0.3405<br>04178 | Up       |
| ENTPD3 | 39.512<br>36685 | 12.28273947 | 66.74199423 | 5.4338<br>03622 | 2.44196<br>2428      | 0.0248<br>82695 | 0.2903<br>73458 | Up       |
| EPCAM  | 1789.7<br>48727 | 715.7810976 | 2863.716357 | 4.0008<br>27021 | 2.00029<br>8254      | 0.0001<br>53668 | 0.0115<br>14193 | Up       |
| EPDR1  | 490.87<br>59296 | 814.0512176 | 167.7006415 | 0.2060<br>07482 | -<br>2.27923<br>136  | 0.0044<br>56056 | 0.1060<br>2655  | Dow<br>n |
| EPHA1  | 314.43<br>52992 | 114.7680478 | 514.1025507 | 4.4794<br>91991 | 2.16333<br>5129      | 8.91E-<br>05    | 0.0079<br>36352 | Up       |
| EPHA3  | 267.69<br>99452 | 407.1287714 | 128.2711191 | 0.3150<br>62771 | -<br>1.66628<br>8803 | 0.0104<br>62262 | 0.1764<br>94239 | Dow<br>n |
| EPHB1  | 69.445<br>1621  | 116.7752013 | 22.11512287 | 0.1893<br>82014 | -<br>2.40062<br>877  | 0.0095<br>68818 | 0.1649<br>81835 | Dow<br>n |
| EPHB2  | 139.84<br>80741 | 244.0842898 | 35.61185836 | 0.1458<br>99838 | -<br>2.77694<br>9812 | 1.79E-<br>05    | 0.0024<br>60783 | Dow<br>n |
| EPHB6  | 302.86<br>55138 | 78.16349877 | 527.5675287 | 6.7495<br>38302 | 2.75478<br>8819      | 0.0049<br>8249  | 0.1128<br>4649  | Up       |
| EPN3   | 178.40<br>86866 | 88.80443282 | 268.0129403 | 3.0180<br>13086 | 1.59359<br>9061      | 0.0040<br>05299 | 0.0998<br>99158 | Up       |
| EPOR   | 78.204<br>5606  | 127.2297883 | 29.17933294 | 0.2293<br>43563 | -<br>2.12441<br>768  | 0.0192<br>35066 | 0.2520<br>32404 | Dow<br>n |
| EPPK1  | 374.77          | 133.1928207 | 616.3594578 | 4.6275          | 2.21025              | 9.06E-          | 0.0079          | Up       |

|         |                 |             |             |                 |                      |                 |                 |      |
|---------|-----------------|-------------|-------------|-----------------|----------------------|-----------------|-----------------|------|
|         | 61393           |             |             | 72677           | 5648                 | 05              | 89441           |      |
| EPS8L1  | 328.14<br>65066 | 145.6272153 | 510.6657978 | 3.5066<br>6458  | 1.81009<br>944       | 0.0014<br>76709 | 0.0527<br>00957 | Up   |
| ERAP1   | 1105.2<br>94498 | 641.3436725 | 1569.245324 | 2.4468<br>08772 | 1.29090<br>1353      | 0.0324<br>73989 | 0.3387<br>35349 | Up   |
| ERBB2   | 2707.2<br>54872 | 1633.265697 | 3781.244047 | 2.3151<br>43246 | 1.211101<br>461      | 0.0272<br>29722 | 0.3069<br>56512 | Up   |
| ERBB3   | 2275.6<br>82204 | 830.6370029 | 3720.727404 | 4.4793<br>66307 | 2.16329<br>465       | 0.0014<br>79952 | 0.0527<br>00957 | Up   |
| ERBB4   | 57.480<br>49225 | 24.93639166 | 90.02459284 | 3.6101<br>69189 | 1.85206<br>645       | 0.0066<br>99502 | 0.1329<br>28964 | Up   |
| EREG    | 14.792<br>14645 | 3.198120115 | 26.38617278 | 8.2505<br>25882 | 3.04448<br>6079      | 0.0442<br>47439 | 0.4016<br>66679 | Up   |
| ERMAP   | 71.198<br>94693 | 104.2410229 | 38.156871   | 0.3660<br>44672 | -<br>1.44990<br>8371 | 0.0202<br>49968 | 0.2608<br>56148 | Down |
| ERN2    | 26.625<br>5561  | 9.313738435 | 43.93737376 | 4.7174<br>79889 | 2.23801<br>6368      | 0.0495<br>92743 | 0.4274<br>29088 | Up   |
| ESM1    | 209.66<br>39731 | 91.74170647 | 327.5862397 | 3.5707<br>45    | 1.83622<br>511       | 0.0379<br>36502 | 0.3704<br>26665 | Up   |
| ESPL1   | 169.31<br>49646 | 240.6764889 | 97.9534402  | 0.4069<br>92144 | -<br>1.29692<br>7148 | 0.0405<br>5294  | 0.3828<br>15499 | Down |
| ESRP1   | 760.60<br>09366 | 389.887264  | 1131.314609 | 2.9016<br>45459 | 1.53687<br>1253      | 0.0295<br>35244 | 0.3211<br>19889 | Up   |
| ESRRB   | 161.68<br>18693 | 32.69494527 | 290.6687933 | 8.8903<br>28182 | 3.15223<br>6676      | 0.0205<br>3175  | 0.2626<br>04875 | Up   |
| ESRRG   | 173.66<br>47048 | 105.4692839 | 241.8601258 | 2.2931<br>80695 | 1.19735<br>0039      | 0.0276<br>68792 | 0.3092<br>30348 | Up   |
| EVA1C   | 364.23<br>32111 | 144.6544304 | 583.8119917 | 4.0359<br>08129 | 2.01289<br>3334      | 0.0001<br>72941 | 0.0124<br>89974 | Up   |
| EVC     | 414.62<br>99481 | 652.7972064 | 176.4626899 | 0.2703<br>17777 | -<br>1.88727<br>1702 | 0.0004<br>06735 | 0.0222<br>99766 | Down |
| EVC2    | 333.45<br>91523 | 498.6988039 | 168.2195007 | 0.3373<br>16832 | -<br>1.56782<br>3784 | 0.0138<br>84576 | 0.2096<br>44266 | Down |
| EVPL    | 148.47<br>80893 | 215.5432079 | 81.4129708  | 0.3777<br>10676 | -<br>1.40464<br>6532 | 0.0399<br>79372 | 0.3806<br>98819 | Down |
| EXOC3L4 | 141.49<br>28651 | 32.76941556 | 250.2163145 | 7.6356<br>66072 | 2.93275<br>4011      | 0.0054<br>82808 | 0.1182<br>2222  | Up   |
| EXOSC5  | 363.53<br>06204 | 209.7437011 | 517.3175398 | 2.4664<br>27059 | 1.30242<br>2622      | 0.0145<br>23421 | 0.2160<br>00543 | Up   |

|              |                 |             |             |                 |                      |                 |                 |      |
|--------------|-----------------|-------------|-------------|-----------------|----------------------|-----------------|-----------------|------|
| EXPH5        | 52.066<br>25303 | 16.89029584 | 87.24221023 | 5.1652<br>26889 | 2.36883<br>1723      | 0.0070<br>96155 | 0.1379<br>5692  | Up   |
| EXTL2        | 237.21<br>513   | 362.8604881 | 111.5697718 | 0.3074<br>72914 | -<br>1.70146<br>8767 | 0.0059<br>84973 | 0.1251<br>48567 | Down |
| EYA2         | 126.75<br>3066  | 49.46912874 | 204.0370033 | 4.1245<br>31977 | 2.04423<br>0422      | 0.0138<br>17454 | 0.2093<br>3385  | Up   |
| F13A1        | 851.87<br>34744 | 1547.634127 | 156.112822  | 0.1008<br>71918 | -<br>3.30940<br>3507 | 0.0205<br>1551  | 0.2625<br>83925 | Down |
| F2RL2        | 498.18<br>14838 | 708.5274844 | 287.8354833 | 0.4062<br>44627 | -<br>1.29957<br>9365 | 0.0082<br>81567 | 0.1498<br>2637  | Down |
| FABP7        | 43.080<br>26472 | 64.00554119 | 22.15498825 | 0.3461<br>41722 | -<br>1.53056<br>5248 | 0.0140<br>225   | 0.2108<br>08596 | Down |
| FAIM         | 207.98<br>346   | 124.4669106 | 291.5000094 | 2.3419<br>87988 | 1.22773<br>3676      | 0.0415<br>2211  | 0.3864<br>86597 | Up   |
| FAM102B      | 731.78<br>55595 | 1078.314822 | 385.2562973 | 0.3572<br>7627  | -<br>1.48488<br>8001 | 0.0030<br>75388 | 0.0853<br>46759 | Down |
| FAM105A      | 2292.9<br>3886  | 3855.250297 | 730.6274222 | 0.1895<br>14912 | -<br>2.39961<br>6721 | 0.0131<br>69016 | 0.2041<br>53801 | Down |
| FAM109B      | 608.22<br>49015 | 1011.031777 | 205.4180258 | 0.2031<br>76627 | -<br>2.29919<br>3651 | 7.90E-<br>06    | 0.0013<br>95796 | Down |
| FAM110A      | 349.61<br>3754  | 161.981639  | 537.245869  | 3.3167<br>08439 | 1.72975<br>2195      | 0.0016<br>88501 | 0.0575<br>0816  | Up   |
| FAM114A<br>1 | 1833.3<br>7992  | 2580.541907 | 1086.217933 | 0.4209<br>26291 | -<br>1.24836<br>0473 | 0.0052<br>53187 | 0.1165<br>36111 | Down |
| FAM124A      | 20.019<br>42048 | 33.99954037 | 6.039300589 | 0.1776<br>28889 | -<br>2.49306<br>1857 | 0.0053<br>90164 | 0.1173<br>83463 | Down |
| FAM131C      | 19.373<br>81089 | 7.454539219 | 31.29308256 | 4.1978<br>5605  | 2.06965<br>2696      | 0.0255<br>37935 | 0.2947<br>2169  | Up   |
| FAM13C       | 652.15<br>95745 | 885.7666653 | 418.5524837 | 0.4725<br>31311 | -<br>1.08151<br>8166 | 0.0230<br>73707 | 0.2798<br>03347 | Down |
| FAM155A      | 7.6504<br>63526 | 13.79232728 | 1.508599773 | 0.1093<br>79639 | -<br>3.19258<br>3895 | 0.0469<br>94896 | 0.4163<br>09961 | Down |
| FAM171B      | 77.070          | 117.589097  | 36.55156701 | 0.3108          | -                    | 0.0079          | 0.1466          | Down |

|              |                 |             |             |                 |                      |                 |                 |      |
|--------------|-----------------|-------------|-------------|-----------------|----------------------|-----------------|-----------------|------|
|              | 33201           |             |             | 41464           | 1.68574<br>9135      | 86925           | 20385           | n    |
| FAM174B      | 417.17<br>17766 | 255.2227338 | 579.1208195 | 2.2690<br>80073 | 1.18210<br>7521      | 0.0268<br>26632 | 0.3041<br>76114 | Up   |
| FAM180B      | 202.75<br>88193 | 363.2300145 | 42.28762405 | 0.1164<br>21062 | -<br>3.10257<br>6011 | 0.0047<br>29543 | 0.1099<br>96813 | Down |
| FAM184A      | 107.82<br>54872 | 32.27611771 | 183.3748568 | 5.6814<br>40946 | 2.50625<br>6877      | 0.0301<br>32588 | 0.3240<br>87515 | Up   |
| FAM184B      | 157.62<br>69949 | 43.76778867 | 271.4862011 | 6.2028<br>76804 | 2.63293<br>7472      | 2.22E-<br>05    | 0.0028<br>93421 | Up   |
| FAM189A<br>2 | 431.31<br>08466 | 244.7108544 | 617.9108387 | 2.5250<br>65103 | 1.33632<br>0585      | 0.0238<br>77603 | 0.2849<br>30945 | Up   |
| FAM195A      | 278.47<br>09696 | 166.1980531 | 390.7438861 | 2.3510<br>73787 | 1.23331<br>9818      | 0.0494<br>43514 | 0.4268<br>56801 | Up   |
| FAM196B      | 8.5532<br>09733 | 17.10641947 | 0           | 0               | #NAME<br>?           | 0.0012<br>05662 | 0.0457<br>34431 | Down |
| FAM221A      | 63.539<br>69449 | 27.72495138 | 99.3544376  | 3.5835<br>74818 | 1.84139<br>9476      | 0.0058<br>42848 | 0.1231<br>80712 | Up   |
| FAM26F       | 46.140<br>41712 | 22.554456   | 69.72637825 | 3.0914<br>67967 | 1.62829<br>2057      | 0.0224<br>38566 | 0.2753<br>4556  | Up   |
| FAM3B        | 275.85<br>35991 | 51.57247558 | 500.1347226 | 9.6977<br>06325 | 3.27764<br>3565      | 0.0111<br>50987 | 0.1841<br>39764 | Up   |
| FAM3C        | 1103.9<br>11356 | 1505.232466 | 702.5902469 | 0.4667<br>65276 | -<br>1.09923<br>0857 | 0.0309<br>28633 | 0.3293<br>01125 | Down |
| FAM46A       | 3306.4<br>16742 | 4858.422536 | 1754.410949 | 0.3611<br>07116 | -<br>1.46950<br>1245 | 0.0013<br>5623  | 0.0493<br>70604 | Down |
| FAM46B       | 546.74<br>83106 | 877.4515916 | 216.0450295 | 0.2462<br>18745 | -<br>2.02198<br>7495 | 0.0136<br>42606 | 0.2082<br>83578 | Down |
| FAM64A       | 82.148<br>76874 | 149.8394181 | 14.45811942 | 0.0964<br>90761 | -<br>3.37346<br>5385 | 7.92E-<br>06    | 0.0013<br>95796 | Down |
| FAM69A       | 374.94<br>00318 | 557.9081736 | 191.97189   | 0.3440<br>9227  | -<br>1.53913<br>2612 | 0.0060<br>75524 | 0.1266<br>99009 | Down |
| FAM73A       | 412.07<br>17029 | 587.5358093 | 236.6075964 | 0.4027<br>11788 | -<br>1.31218<br>0391 | 0.0125<br>35518 | 0.1984<br>38578 | Down |
| FAM83A       | 4.7914<br>25684 | 0           | 9.582851368 | Inf             | Inf                  | 0.0111<br>34212 | 0.1841<br>27202 | Up   |
| FAM83B       | 47.359          | 14.03483779 | 80.68332332 | 5.7487          | 2.52325              | 0.0063          | 0.1296          | Up   |

|        |                 |             |             |                 |                      |                 |                 |      |
|--------|-----------------|-------------|-------------|-----------------|----------------------|-----------------|-----------------|------|
|        | 08056           |             |             | 89157           | 8119                 | 71595           | 15837           |      |
| FAM83D | 136.01<br>2896  | 243.8238061 | 28.20198589 | 0.1156<br>65432 | -<br>3.111970<br>331 | 0.0124<br>8255  | 0.1981<br>23304 | Down |
| FAM83H | 835.07<br>85281 | 435.7364168 | 1234.420639 | 2.8329<br>52656 | 1.50230<br>6492      | 0.0062<br>61424 | 0.1286<br>45163 | Up   |
| FAP    | 590.97<br>65712 | 995.2538353 | 186.6993071 | 0.1875<br>89638 | -<br>2.41434<br>7952 | 0.0039<br>78321 | 0.0998<br>09354 | Down |
| FAS    | 467.27<br>15503 | 277.3917792 | 657.1513215 | 2.3690<br>36759 | 1.24430<br>0584      | 0.0246<br>57506 | 0.2886<br>82252 | Up   |
| FAT2   | 455.40<br>84207 | 212.9379493 | 697.8788921 | 3.2773<br>81484 | 1.71254<br>3611      | 0.0210<br>50257 | 0.2665<br>82238 | Up   |
| FAT3   | 134.55<br>05014 | 264.0168474 | 5.084155416 | 0.0192<br>56936 | -<br>5.69847<br>8051 | 0.0178<br>15347 | 0.2423<br>39933 | Down |
| FAT4   | 1545.3<br>51434 | 2124.682007 | 966.0208604 | 0.4546<br>6609  | -<br>1.13712<br>0686 | 0.0242<br>73879 | 0.2863<br>81143 | Down |
| FBLIM1 | 2069.7<br>20802 | 2813.176762 | 1326.264841 | 0.4714<br>4739  | -<br>1.08483<br>131  | 0.0253<br>59623 | 0.2941<br>48968 | Down |
| FBLN1  | 11346.<br>57223 | 19464.07882 | 3229.065638 | 0.1658<br>98714 | -<br>2.59162<br>5396 | 1.08E-<br>07    | 5.23E-<br>05    | Down |
| FBLN2  | 8664.7<br>09128 | 14191.40393 | 3138.014326 | 0.2211<br>20781 | -<br>2.17709<br>3476 | 0.0015<br>44568 | 0.0546<br>77084 | Down |
| FBLN5  | 2662.9<br>55773 | 3804.127299 | 1521.784247 | 0.4000<br>35048 | -<br>1.32180<br>1691 | 0.0064<br>60973 | 0.1311<br>37331 | Down |
| FBLN7  | 484.51<br>71092 | 807.1039081 | 161.9303102 | 0.2006<br>31305 | -<br>2.31738<br>1365 | 0.0010<br>62667 | 0.0417<br>24778 | Down |
| FBN1   | 27646.<br>27257 | 51353.16552 | 3939.379614 | 0.0767<br>11524 | -<br>3.70441<br>2857 | 8.20E-<br>05    | 0.0073<br>7089  | Down |
| FBP2   | 57.587<br>00378 | 25.79560375 | 89.37840381 | 3.4648<br>69621 | 1.79280<br>1067      | 0.0143<br>56014 | 0.2144<br>9104  | Up   |
| FBXL8  | 83.737<br>10073 | 128.2296641 | 39.24453734 | 0.3060<br>4882  | -<br>1.70816<br>6291 | 0.0077<br>07222 | 0.1443<br>34849 | Down |
| FBXO17 | 127.91<br>15542 | 188.1696826 | 67.65342571 | 0.3595<br>34144 | -<br>1.47579         | 0.0171<br>52516 | 0.2376<br>37666 | Down |



|        |                 |             |             |                 |                      |                 |                 |      |  |
|--------|-----------------|-------------|-------------|-----------------|----------------------|-----------------|-----------------|------|--|
|        |                 |             |             |                 | 931                  |                 |                 |      |  |
| FCER1A | 44.212<br>68514 | 70.08646676 | 18.33890351 | 0.2616<br>61122 | -<br>1.93422<br>8514 | 0.0151<br>35009 | 0.2210<br>99002 | Down |  |
| FERMT2 | 4103.0<br>69557 | 6384.791784 | 1821.347331 | 0.2852<br>63387 | -<br>1.80963<br>3502 | 0.0040<br>43338 | 0.1005<br>23131 | Down |  |
| FEZ1   | 143.25<br>4561  | 231.7474449 | 54.76167704 | 0.2362<br>98946 | -<br>2.08131<br>4899 | 0.0305<br>28157 | 0.3269<br>73112 | Down |  |
| FGD3   | 247.98<br>72803 | 145.4891816 | 350.485379  | 2.4090<br>13337 | 1.26844<br>2381      | 0.0129<br>93556 | 0.2024<br>81037 | Up   |  |
| FGF10  | 22.867<br>57445 | 37.71457745 | 8.020571452 | 0.2126<br>65022 | -<br>2.23334<br>5327 | 0.0485<br>29969 | 0.4226<br>44796 | Down |  |
| FGF16  | 15.295<br>22399 | 28.03647966 | 2.553968317 | 0.0910<br>94472 | -<br>3.45649<br>2679 | 0.0086<br>10313 | 0.1542<br>22373 | Down |  |
| FGF18  | 29.551<br>3874  | 56.37646234 | 2.726312455 | 0.0483<br>59055 | -<br>4.37007<br>013  | 0.0331<br>4209  | 0.3430<br>0573  | Down |  |
| FGFBP1 | 5554.9<br>53248 | 1936.270951 | 9173.635545 | 4.7377<br>85041 | 2.24421<br>2743      | 0.0186<br>80793 | 0.2482<br>9024  | Up   |  |
| FGFR3  | 32.909<br>36048 | 12.79454259 | 53.02417837 | 4.1442<br>8089  | 2.051121<br>789      | 0.0114<br>93412 | 0.1878<br>96387 | Up   |  |
| FGFR4  | 39.497<br>18968 | 17.2942061  | 61.70017326 | 3.5676<br>78846 | 1.83498<br>5753      | 0.0227<br>18482 | 0.2773<br>56735 | Up   |  |
| FGG    | 560.17<br>48239 | 161.2133984 | 959.1362493 | 5.9494<br>82232 | 2.57276<br>412       | 0.0181<br>75374 | 0.2451<br>8736  | Up   |  |
| FGL2   | 1775.7<br>77    | 2981.474612 | 570.0793878 | 0.1912<br>07192 | -<br>2.38679<br>1307 | 0.0254<br>00132 | 0.2941<br>48968 | Down |  |
| FHL1   | 10966.<br>09282 | 18137.46231 | 3794.723336 | 0.2092<br>20191 | -<br>2.25690<br>6005 | 0.0036<br>7275  | 0.0955<br>81857 | Down |  |
| FHOD3  | 349.16<br>65326 | 524.3210742 | 174.011991  | 0.3318<br>80597 | -<br>1.59126<br>3809 | 0.0065<br>77882 | 0.1315<br>79591 | Down |  |
| FIBIN  | 132.49<br>36604 | 223.2640494 | 41.72327128 | 0.1868<br>78592 | -<br>2.41982<br>6783 | 0.0009<br>31727 | 0.0386<br>9573  | Down |  |
| FIGF   | 696.21<br>88332 | 1212.881126 | 179.5565406 | 0.1480<br>41335 | -<br>2.75592<br>8048 | 0.0459<br>80081 | 0.4107<br>59961 | Down |  |

|         |                 |             |             |                 |                      |                 |                 |          |
|---------|-----------------|-------------|-------------|-----------------|----------------------|-----------------|-----------------|----------|
| FIGNL2  | 131.21<br>04111 | 184.1813109 | 78.23951128 | 0.4247<br>96147 | -<br>1.23515<br>7413 | 0.0244<br>13682 | 0.2865<br>8018  | Dow<br>n |
| FILIP1L | 3594.8<br>20377 | 6059.547598 | 1130.093156 | 0.1864<br>97942 | -<br>2.42276<br>8385 | 0.0041<br>7225  | 0.1021<br>75662 | Dow<br>n |
| FKBP10  | 2630.6<br>67187 | 4739.110051 | 522.2243232 | 0.1101<br>94597 | -<br>3.18187<br>4604 | 2.30E-<br>05    | 0.0029<br>79023 | Dow<br>n |
| FKBP14  | 953.37<br>37422 | 1418.607261 | 488.140223  | 0.3440<br>98213 | -<br>1.53910<br>7697 | 0.0020<br>67822 | 0.0654<br>67676 | Dow<br>n |
| FKBP7   | 927.07<br>83024 | 1640.953066 | 213.2035383 | 0.1299<br>26652 | -<br>2.94423<br>069  | 0.0006<br>85496 | 0.0324<br>40215 | Dow<br>n |
| FKBP9   | 3905.9<br>31137 | 5722.561611 | 2089.300663 | 0.3650<br>9885  | -<br>1.45364<br>097  | 0.0031<br>66707 | 0.0866<br>77159 | Dow<br>n |
| FLNA    | 92020.<br>71923 | 146706.0136 | 37335.42483 | 0.2544<br>91441 | -<br>1.97431<br>0958 | 0.0390<br>25534 | 0.3767<br>0599  | Dow<br>n |
| FLNC    | 9893.8<br>58348 | 18736.77173 | 1050.944966 | 0.0560<br>8997  | -<br>4.156113<br>376 | 0.0052<br>14285 | 0.1160<br>50112 | Dow<br>n |
| FLRT2   | 1636.4<br>52511 | 2823.820135 | 449.084888  | 0.1590<br>34523 | -<br>2.65258<br>8118 | 4.24E-<br>06    | 0.0009<br>19069 | Dow<br>n |
| FLT4    | 772.23<br>01335 | 1346.293584 | 198.1666828 | 0.1471<br>94256 | -<br>2.76420<br>6719 | 2.35E-<br>06    | 0.0005<br>94874 | Dow<br>n |
| FMO4    | 585.27<br>19585 | 260.2757305 | 910.2681865 | 3.4973<br>22569 | 1.80625<br>0866      | 0.0208<br>72919 | 0.2648<br>48106 | Up       |
| FMOD    | 10047.<br>59046 | 17235.07086 | 2860.11006  | 0.1659<br>47102 | -<br>2.59120<br>4661 | 0.0049<br>27027 | 0.1125<br>82891 | Dow<br>n |
| FN1     | 10089<br>0.4649 | 179416.7939 | 22364.136   | 0.1246<br>49067 | -<br>3.00405<br>6008 | 0.0072<br>15157 | 0.1391<br>30255 | Dow<br>n |
| FOS     | 3807.9<br>4663  | 7078.180843 | 537.7124166 | 0.0759<br>67601 | -<br>3.71847<br>1931 | 0.0175<br>21347 | 0.2407<br>07707 | Dow<br>n |
| FOSB    | 888.06<br>3265  | 1705.542158 | 70.58437167 | 0.0413<br>85299 | -<br>4.59473<br>782  | 0.0398<br>36504 | 0.3806<br>98819 | Dow<br>n |

|       |                 |             |             |                 |                      |                 |                 |      |
|-------|-----------------|-------------|-------------|-----------------|----------------------|-----------------|-----------------|------|
| FOXA1 | 84.900<br>36189 | 13.2789983  | 156.5217255 | 11.787<br>16361 | 3.55914<br>4693      | 2.89E-<br>07    | 0.0001<br>18195 | Up   |
| FOXA3 | 63.016<br>93013 | 5.803524718 | 120.2303355 | 20.716<br>7784  | 4.37272<br>7767      | 0.0095<br>15147 | 0.1643<br>71658 | Up   |
| FOXI1 | 111.53<br>75043 | 38.92371059 | 184.151298  | 4.7310<br>82808 | 2.24217<br>0412      | 0.0334<br>09647 | 0.3439<br>07089 | Up   |
| FOXJ1 | 31.740<br>98847 | 5.420152835 | 58.0618241  | 10.712<br>21161 | 3.421184<br>459      | 0.0229<br>64372 | 0.2790<br>32639 | Up   |
| FOXP2 | 71.607<br>48804 | 120.3719485 | 22.84302755 | 0.1897<br>70356 | -<br>2.39767<br>3447 | 0.0287<br>72833 | 0.3156<br>93631 | Down |
| FRRS1 | 241.68<br>0966  | 66.46008337 | 416.9018487 | 6.2729<br>66081 | 2.64914<br>7762      | 0.0015<br>39759 | 0.0546<br>14375 | Up   |
| FSTL1 | 19622.<br>07649 | 34259.98075 | 4984.172231 | 0.1454<br>80882 | -<br>2.78109<br>8513 | 3.22E-<br>05    | 0.0038<br>14515 | Down |
| FSTL3 | 938.68<br>09655 | 1508.406464 | 368.9554673 | 0.2445<br>995   | -<br>2.03150<br>6639 | 0.0002<br>30312 | 0.0152<br>61155 | Down |
| FUT11 | 276.26<br>79287 | 397.5157662 | 155.0200912 | 0.3899<br>72183 | -<br>1.35855<br>6875 | 0.0051<br>33621 | 0.1149<br>66266 | Down |
| FUT2  | 96.213<br>93789 | 15.83083794 | 176.5970378 | 11.155<br>25524 | 3.47965<br>1619      | 0.0058<br>44806 | 0.1231<br>80712 | Up   |
| FUT8  | 436.35<br>98536 | 591.4265366 | 281.2931705 | 0.4756<br>18108 | -<br>1.07212<br>4451 | 0.0499<br>73258 | 0.4291<br>63853 | Down |
| FUZ   | 105.11<br>05835 | 60.91302515 | 149.3081418 | 2.4511<br>69376 | 1.29347<br>0178      | 0.0362<br>0997  | 0.3612<br>25864 | Up   |
| FXYD1 | 1259.9<br>99671 | 2144.104942 | 375.8944003 | 0.1753<br>153   | -<br>2.511976<br>191 | 0.0010<br>26061 | 0.0409<br>12776 | Down |
| FXYD3 | 94.488<br>49474 | 27.77693241 | 161.2000571 | 5.8033<br>7867  | 2.53689<br>3068      | 0.0147<br>85158 | 0.2180<br>14284 | Up   |
| FXYD5 | 1292.8<br>43143 | 1815.311841 | 770.3744452 | 0.4243<br>75817 | -<br>1.23658<br>5649 | 0.0151<br>04405 | 0.2208<br>3132  | Down |
| FXYD6 | 4548.0<br>28052 | 2877.264844 | 6218.79126  | 2.1613<br>55175 | 1.111936<br>169      | 0.0293<br>42585 | 0.3196<br>88105 | Up   |
| FXYD7 | 15.443<br>05638 | 24.53680327 | 6.349309488 | 0.2587<br>66776 | -<br>1.95027<br>5696 | 0.0425<br>49918 | 0.3931<br>014   | Down |
| FZD2  | 271.56<br>73904 | 436.2166007 | 106.91818   | 0.2451<br>03419 | -<br>2.02853         | 0.0027<br>79078 | 0.0804<br>76899 | Down |

|             |                 |             |             |                 |                      |                 |                 |      |
|-------------|-----------------|-------------|-------------|-----------------|----------------------|-----------------|-----------------|------|
|             |                 |             |             |                 | 7489                 |                 |                 |      |
| FZD3        | 146.57<br>469   | 83.14705265 | 210.0023273 | 2.5256<br>73738 | 1.33666<br>8287      | 0.0220<br>23199 | 0.2729<br>44996 | Up   |
| FZD7        | 859.61<br>08    | 389.2500418 | 1329.971558 | 3.4167<br>53797 | 1.77262<br>6294      | 0.0046<br>20814 | 0.1083<br>39122 | Up   |
| GABRB1      | 6.9693<br>16522 | 13.44684015 | 0.491792899 | 0.0365<br>7312  | -<br>4.77307<br>2482 | 0.0161<br>63648 | 0.2286<br>65812 | Down |
| GABRE       | 175.67<br>09375 | 281.2554563 | 70.08641865 | 0.2491<br>91321 | -<br>2.00467<br>4273 | 0.0181<br>88286 | 0.2451<br>8736  | Down |
| GADD45<br>G | 1921.7<br>43553 | 3590.295732 | 253.1913748 | 0.0705<br>21036 | -<br>3.82580<br>2519 | 9.65E-<br>06    | 0.0015<br>8056  | Down |
| GADL1       | 65.737<br>76897 | 131.2367516 | 0.238786293 | 0.0018<br>19508 | -<br>9.10223<br>605  | 0.0103<br>46099 | 0.1755<br>22537 | Down |
| GAL3ST4     | 338.47<br>70802 | 574.8925741 | 102.0615863 | 0.1775<br>31579 | -<br>2.49385<br>2426 | 0.0039<br>52245 | 0.0998<br>09354 | Down |
| GALNT15     | 227.01<br>50132 | 323.7461583 | 130.2838682 | 0.4024<br>2599  | -<br>1.31320<br>4614 | 0.0164<br>63404 | 0.2314<br>78806 | Down |
| GALNT16     | 2668.6<br>82602 | 4289.777218 | 1047.587987 | 0.2442<br>05686 | -<br>2.03383<br>1305 | 5.00E-<br>05    | 0.0053<br>0761  | Down |
| GALNT6      | 181.30<br>63448 | 112.3996182 | 250.2130715 | 2.2261<br>02504 | 1.15452<br>0025      | 0.0257<br>94383 | 0.2969<br>65676 | Up   |
| GALNT8      | 23.510<br>05675 | 3.420826136 | 43.59928737 | 12.745<br>25089 | 3.67188<br>7868      | 0.0037<br>18657 | 0.0961<br>00187 | Up   |
| GAS1        | 2061.2<br>4221  | 3115.901637 | 1006.582783 | 0.3230<br>47034 | -<br>1.63018<br>3864 | 0.0288<br>09201 | 0.3157<br>67335 | Down |
| GAS2L1      | 807.12<br>207   | 1151.908957 | 462.335183  | 0.4013<br>64344 | -<br>1.31701<br>5637 | 0.0063<br>50624 | 0.1293<br>35537 | Down |
| GAS7        | 930.93<br>5269  | 1469.54922  | 392.3213176 | 0.2669<br>67116 | -<br>1.90526<br>6046 | 0.0004<br>55572 | 0.0241<br>6682  | Down |
| GAT         | 8.2034<br>83994 | 14.6311413  | 1.775826691 | 0.1213<br>73081 | -<br>3.04247<br>9614 | 0.0441<br>85618 | 0.4014<br>57376 | Down |
| GATA5       | 70.517<br>42506 | 129.5681641 | 11.46668598 | 0.0884<br>99255 | -<br>3.49819         | 0.0374<br>79729 | 0.3683<br>04897 | Down |

|        |                 |             |             |                 |                      |                 |                 |      |
|--------|-----------------|-------------|-------------|-----------------|----------------------|-----------------|-----------------|------|
|        |                 |             |             |                 | 0881                 |                 |                 |      |
| GCGR   | 49.427<br>09542 | 10.14085621 | 88.71333463 | 8.7481<br>10889 | 3.12897<br>1508      | 0.0003<br>19867 | 0.0187<br>36707 | Up   |
| GCLC   | 613.02<br>39982 | 402.5203748 | 823.5276216 | 2.0459<br>27792 | 1.03275<br>5228      | 0.0345<br>40312 | 0.3517<br>20515 | Up   |
| GDF1   | 101.36<br>66212 | 156.454636  | 46.2786064  | 0.2957<br>95686 | -<br>1.75732<br>7083 | 0.0017<br>5225  | 0.0591<br>19533 | Down |
| GDF10  | 85.069<br>57671 | 147.5776942 | 22.56145927 | 0.1528<br>78519 | -<br>2.70954<br>239  | 9.59E-<br>06    | 0.0015<br>8056  | Down |
| GDF11  | 112.61<br>97501 | 196.4127161 | 28.82678414 | 0.1467<br>66384 | -<br>2.76840<br>6528 | 0.0077<br>21188 | 0.1443<br>34849 | Down |
| GDF6   | 36.475<br>98075 | 65.84841265 | 7.103548853 | 0.1078<br>77298 | -<br>3.21253<br>6799 | 0.0308<br>90865 | 0.3290<br>93852 | Down |
| GEM    | 3148.1<br>82123 | 4900.823341 | 1395.540905 | 0.2847<br>56419 | -<br>1.81219<br>9731 | 0.0176<br>33591 | 0.2413<br>27911 | Down |
| GFPT2  | 1956.7<br>34558 | 3649.100279 | 264.3688366 | 0.0724<br>47677 | -<br>3.78691<br>6768 | 1.00E-<br>05    | 0.0016<br>27848 | Down |
| GFRA3  | 99.532<br>71027 | 182.3945779 | 16.67084265 | 0.0913<br>99881 | -<br>3.45166<br>3908 | 7.74E-<br>08    | 4.22E-<br>05    | Down |
| GFRA4  | 2437.4<br>46844 | 4452.315178 | 422.5785094 | 0.0949<br>12083 | -<br>3.39726<br>442  | 0.0001<br>39834 | 0.0107<br>46284 | Down |
| GGT6   | 177.31<br>92058 | 67.58211771 | 287.0562938 | 4.2475<br>18479 | 2.08662<br>0224      | 0.0067<br>96951 | 0.1342<br>51998 | Up   |
| GIMAP6 | 354.32<br>4754  | 222.836129  | 485.8133791 | 2.1801<br>37401 | 1.12441<br>9062      | 0.0248<br>62245 | 0.2903<br>23216 | Up   |
| GIPC3  | 81.449<br>35226 | 135.7164421 | 27.18226242 | 0.2002<br>87172 | -<br>2.31985<br>8071 | 0.0494<br>05218 | 0.4267<br>31044 | Down |
| GJA1   | 6301.4<br>46291 | 11533.76419 | 1069.128388 | 0.0926<br>9553  | -<br>3.43135<br>6415 | 0.0394<br>19059 | 0.3787<br>38227 | Down |
| GJB1   | 52.416<br>20175 | 24.55624082 | 80.27616267 | 3.2690<br>73767 | 1.70888<br>1932      | 0.0242<br>54489 | 0.2863<br>81143 | Up   |
| GJB3   | 59.348<br>48234 | 12.99066413 | 105.7063006 | 8.1370<br>97499 | 3.02451<br>4277      | 0.0008<br>35423 | 0.0367<br>32075 | Up   |
| GJB4   | 23.005          | 0.9906087   | 45.0203807  | 45.447          | 5.506119             | 0.0039          | 0.0998          | Up   |

|        |                 |             |             |                 |                      |                 |                 |      |
|--------|-----------------|-------------|-------------|-----------------|----------------------|-----------------|-----------------|------|
|        | 4947            |             |             | 18888           | 155                  | 64745           | 09354           |      |
| GJB5   | 20.068<br>16957 | 5.402043537 | 34.73429559 | 6.4298<br>43699 | 2.68478<br>3668      | 0.0067<br>439   | 0.1334<br>16456 | Up   |
| GJC1   | 526.44<br>67258 | 786.3838035 | 266.509648  | 0.3389<br>05312 | -<br>1.56104<br>5846 | 0.0030<br>35924 | 0.0850<br>45521 | Down |
| GLB1   | 1336.1<br>09261 | 1900.776391 | 771.4421313 | 0.4058<br>56331 | -<br>1.30095<br>8978 | 0.0325<br>20789 | 0.3390<br>12187 | Down |
| GLB1L  | 470.95<br>23528 | 693.3898838 | 248.5148218 | 0.3584<br>05606 | -<br>1.48033<br>489  | 0.0061<br>20425 | 0.1272<br>41164 | Down |
| GLI1   | 29.744<br>22917 | 46.85174316 | 12.63671519 | 0.2697<br>17076 | -<br>1.89048<br>1231 | 0.0169<br>06738 | 0.2356<br>85165 | Down |
| GLI2   | 224.70<br>96336 | 354.8520221 | 94.567245   | 0.2664<br>97692 | -<br>1.90780<br>5055 | 0.0003<br>91757 | 0.0217<br>4375  | Down |
| GLI3   | 1192.9<br>40413 | 1809.924104 | 575.9567212 | 0.3182<br>21477 | -<br>1.65189<br>6889 | 0.0109<br>74924 | 0.1825<br>73604 | Down |
| GLIPR2 | 1228.6<br>70899 | 1745.865864 | 711.475934  | 0.4075<br>20388 | -<br>1.29505<br>5857 | 0.0107<br>94797 | 0.1810<br>84728 | Down |
| GLIS2  | 1150.3<br>48917 | 1608.386017 | 692.3118173 | 0.4304<br>38844 | -<br>1.216119<br>819 | 0.0089<br>2223  | 0.1577<br>14947 | Down |
| GLRX5  | 894.24<br>90499 | 562.9219894 | 1225.57611  | 2.1771<br>68654 | 1.12245<br>317       | 0.0466<br>65978 | 0.4148<br>26632 | Up   |
| GLS    | 1973.7<br>4267  | 2886.210203 | 1061.275138 | 0.3677<br>05421 | -<br>1.44337<br>7648 | 0.0064<br>86191 | 0.1313<br>52664 | Down |
| GLT8D2 | 751.73<br>11967 | 1211.777035 | 291.6853585 | 0.2407<br>08769 | -<br>2.05463<br>9394 | 0.0332<br>0968  | 0.3430<br>48338 | Down |
| GLYAT  | 27.602<br>79288 | 43.04178376 | 12.16380201 | 0.2826<br>04505 | -<br>1.82314<br>3629 | 0.0403<br>03735 | 0.3815<br>3544  | Down |
| GNB4   | 766.90<br>81946 | 1175.675223 | 358.1411666 | 0.3046<br>25937 | -<br>1.71488<br>931  | 0.0011<br>79567 | 0.0451<br>3225  | Down |
| GNB5   | 402.12<br>01271 | 612.5140365 | 191.7262178 | 0.3130<br>15223 | -<br>1.67569<br>5273 | 0.0011<br>20067 | 0.0435<br>692   | Down |

|             |                 |             |             |                 |                      |                 |                 |      |
|-------------|-----------------|-------------|-------------|-----------------|----------------------|-----------------|-----------------|------|
| GNG4        | 21.365<br>51789 | 41.00265047 | 1.728385302 | 0.0421<br>53014 | -<br>4.56822<br>0398 | 0.0004<br>58297 | 0.0241<br>68758 | Down |
| GNG8        | 11.563<br>58358 | 20.42463592 | 2.702531239 | 0.1323<br>17229 | -<br>2.91792<br>7163 | 0.0282<br>82299 | 0.3122<br>16446 | Down |
| GNMT        | 156.28<br>65758 | 29.19114461 | 283.3820071 | 9.7078<br>07312 | 3.27914<br>5473      | 1.28E-<br>07    | 5.93E-<br>05    | Up   |
| GOLGA7<br>B | 649.81<br>18802 | 55.06737602 | 1244.556384 | 22.600<br>61173 | 4.49828<br>9917      | 0.0063<br>12648 | 0.1287<br>07878 | Up   |
| GPAT2       | 22.604<br>32984 | 41.20309388 | 4.005565796 | 0.0972<br>1517  | -<br>3.36267<br>4725 | 0.0007<br>81611 | 0.0353<br>15839 | Down |
| GPATCH4     | 332.61<br>58614 | 203.0538967 | 462.1778261 | 2.2761<br>33744 | 1.18658<br>5332      | 0.0294<br>10564 | 0.3201<br>51437 | Up   |
| GPC6        | 49.600<br>20585 | 78.98281715 | 20.21759454 | 0.2559<br>74594 | -<br>1.96592<br>7469 | 0.0080<br>65198 | 0.1472<br>45137 | Down |
| GPHN        | 1138.1<br>44179 | 529.840036  | 1746.448322 | 3.2961<br>80363 | 1.72079<br>5187      | 0.0201<br>98961 | 0.2606<br>22963 | Up   |
| GPM6A       | 369.41<br>04532 | 691.0237763 | 47.79713021 | 0.0691<br>68575 | -<br>3.85373<br>9446 | 5.02E-<br>05    | 0.0053<br>0761  | Down |
| GPM6B       | 1251.3<br>83401 | 1865.926378 | 636.8404248 | 0.3412<br>99867 | -<br>1.55088<br>8242 | 0.0029<br>80596 | 0.0848<br>05899 | Down |
| GPR1        | 305.34<br>47929 | 596.3529258 | 14.33665986 | 0.0240<br>40563 | -<br>5.37838<br>5529 | 6.94E-<br>06    | 0.0013<br>5665  | Down |
| GPR110      | 224.53<br>18157 | 13.5499861  | 435.5136453 | 32.141<br>2614  | 5.00635<br>4644      | 0.0045<br>30071 | 0.1070<br>48899 | Up   |
| GPR132      | 125.83<br>56652 | 71.98473868 | 179.6865918 | 2.4961<br>76205 | 1.31971<br>9777      | 0.0160<br>3868  | 0.2283<br>63882 | Up   |
| GPR133      | 1824.1<br>90906 | 3433.54145  | 214.8403629 | 0.0625<br>7107  | -<br>3.99836<br>0411 | 1.75E-<br>06    | 0.0005<br>1525  | Down |
| GPR143      | 40.178<br>89966 | 16.51616208 | 63.84163725 | 3.8654<br>03897 | 1.95061<br>917       | 0.0318<br>57479 | 0.3350<br>25167 | Up   |
| GPR153      | 881.79<br>78888 | 1501.816683 | 261.7790946 | 0.1743<br>08288 | -<br>2.52028<br>6928 | 1.47E-<br>06    | 0.0004<br>47737 | Down |
| GPR162      | 76.166<br>68339 | 139.4484254 | 12.88494134 | 0.0923<br>99332 | -<br>3.43597<br>377  | 0.0011<br>21756 | 0.0435<br>692   | Down |

|        |                 |             |             |                 |                      |                 |                 |      |
|--------|-----------------|-------------|-------------|-----------------|----------------------|-----------------|-----------------|------|
| GPR173 | 302.38<br>39221 | 481.0292479 | 123.7385964 | 0.2572<br>37157 | -<br>1.95882<br>9042 | 0.0002<br>76861 | 0.0169<br>34675 | Down |
| GPR63  | 508.94<br>96804 | 734.7683384 | 283.1310224 | 0.3853<br>33727 | -<br>1.37581<br>9628 | 0.0331<br>96833 | 0.3430<br>48338 | Down |
| GPR84  | 36.563<br>3387  | 7.030061538 | 66.09661587 | 9.4019<br>9677  | 3.23296<br>7185      | 0.0101<br>92216 | 0.1735<br>6687  | Up   |
| GPRC5A | 425.19<br>08476 | 712.1489624 | 138.2327329 | 0.1941<br>06486 | -<br>2.36507<br>9766 | 0.0291<br>96133 | 0.3185<br>88632 | Down |
| GPRIN2 | 143.27<br>22282 | 35.38126226 | 251.1631941 | 7.0987<br>62963 | 2.82756<br>7641      | 3.88E-<br>06    | 0.0008<br>63637 | Up   |
| GPSM1  | 1100.5<br>1002  | 1486.791369 | 714.2286713 | 0.4803<br>82578 | -<br>1.05774<br>4264 | 0.0487<br>32156 | 0.4237<br>67101 | Down |
| GPX2   | 22.299<br>2889  | 2.474911226 | 42.12366658 | 17.020<br>27375 | 4.08918<br>2336      | 0.0072<br>14962 | 0.1391<br>30255 | Up   |
| GPX3   | 10861.<br>96322 | 19817.15624 | 1906.770202 | 0.0962<br>18155 | -<br>3.37754<br>7061 | 0.0185<br>90948 | 0.2474<br>42548 | Down |
| GPX7   | 758.31<br>35673 | 1373.198185 | 143.42895   | 0.1044<br>48835 | -<br>3.25913<br>17   | 0.0001<br>02251 | 0.0086<br>73458 | Down |
| GPX8   | 1065.8<br>60443 | 1497.886725 | 633.83416   | 0.4231<br>52265 | -<br>1.24075<br>1207 | 0.0154<br>01479 | 0.2235<br>38982 | Down |
| GRB7   | 305.27<br>88607 | 95.64331811 | 514.9144033 | 5.3836<br>94476 | 2.42859<br>6539      | 2.43E-<br>05    | 0.0030<br>75911 | Up   |
| GREB1  | 1757.0<br>8425  | 3472.015866 | 42.1526338  | 0.0121<br>4068  | -<br>6.36400<br>6953 | 4.52E-<br>07    | 0.0001<br>7305  | Down |
| GRHL2  | 538.95<br>31659 | 257.3104303 | 820.5959016 | 3.1891<br>28015 | 1.67316<br>201       | 0.0018<br>69716 | 0.0611<br>18937 | Up   |
| GRHL3  | 115.50<br>01351 | 34.35596082 | 196.6443093 | 5.7237<br>31913 | 2.51695<br>6101      | 0.0160<br>00453 | 0.2280<br>00119 | Up   |
| GRID1  | 126.46<br>99276 | 232.4453519 | 20.4945034  | 0.0881<br>69126 | -<br>3.50358<br>2639 | 0.0306<br>46081 | 0.3276<br>50696 | Down |
| GRK5   | 1368.7<br>61592 | 1916.773215 | 820.7499681 | 0.4281<br>93571 | -<br>1.22366<br>4959 | 0.0138<br>97757 | 0.2096<br>6725  | Down |
| GRM8   | 19.003<br>00047 | 34.29132224 | 3.714678705 | 0.1083<br>27077 | -<br>3.20653         | 0.0293<br>50223 | 0.3196<br>88105 | Down |



|              |                 |             |             |                 |                      |                 |                 |      |
|--------------|-----------------|-------------|-------------|-----------------|----------------------|-----------------|-----------------|------|
|              |                 |             |             |                 | 4196                 |                 |                 |      |
| GSAP         | 357.79<br>22844 | 190.2696399 | 525.314929  | 2.7608<br>97269 | 1.46513<br>7207      | 0.0048<br>20313 | 0.1108<br>4871  | Up   |
| GSC          | 28.895<br>00599 | 45.66396941 | 12.12604257 | 0.2655<br>49463 | -<br>1.91294<br>7482 | 0.0179<br>54341 | 0.2434<br>93904 | Down |
| GSDMC        | 3.5572<br>23507 | 0           | 7.114447015 | Inf             | Inf                  | 0.0371<br>47936 | 0.3666<br>4727  | Up   |
| GSN          | 48875.<br>81075 | 73899.2044  | 23852.4171  | 0.3227<br>69606 | -<br>1.63142<br>3362 | 0.0278<br>52036 | 0.3096<br>27791 | Down |
| GSTA4        | 494.20<br>16575 | 718.8185755 | 269.5847396 | 0.3750<br>38638 | -<br>1.41488<br>8859 | 0.0044<br>57325 | 0.1060<br>2655  | Down |
| GTF3C1       | 3475.9<br>81991 | 2315.476724 | 4636.487258 | 2.0023<br>89923 | 1.00172<br>2936      | 0.0314<br>3534  | 0.3329<br>77961 | Up   |
| GUCY2D       | 270.73<br>58972 | 49.84416572 | 491.6276286 | 9.8632<br>93357 | 3.30206<br>9443      | 0.0229<br>18181 | 0.2790<br>32639 | Up   |
| GUSB         | 893.01<br>36853 | 1207.288641 | 578.73873   | 0.4793<br>70641 | -<br>1.06078<br>654  | 0.0305<br>09089 | 0.3269<br>73112 | Down |
| GZMB         | 6.0049<br>58345 | 11.50390348 | 0.506013211 | 0.0439<br>86218 | -<br>4.50680<br>4614 | 0.0307<br>64762 | 0.3286<br>94256 | Down |
| HAND2        | 57.618<br>91117 | 103.4503503 | 11.787472   | 0.1139<br>43278 | -<br>3.13361<br>2282 | 0.0106<br>97123 | 0.1798<br>25714 | Down |
| HAPLN3       | 485.42<br>50947 | 686.4378448 | 284.4123446 | 0.4143<br>30805 | -<br>1.271145<br>009 | 0.0212<br>14733 | 0.2674<br>98264 | Down |
| HAS1         | 16.045<br>43571 | 32.09087142 | 0           | 0               | #NAME<br>?           | 0.0075<br>57346 | 0.1435<br>49614 | Down |
| HCN1         | 69.543<br>60417 | 137.0440337 | 2.043174653 | 0.0149<br>08892 | -<br>6.06768<br>3178 | 0.0016<br>9921  | 0.0577<br>63491 | Down |
| HEATR5A      | 1279.6<br>82701 | 1787.680141 | 771.6852612 | 0.4316<br>68531 | -<br>1.21200<br>4171 | 0.0208<br>83869 | 0.2648<br>48106 | Down |
| HENMT1       | 56.315<br>10453 | 91.89534001 | 20.73486904 | 0.2256<br>35696 | -<br>2.14793<br>2769 | 0.0241<br>92185 | 0.2863<br>81143 | Down |
| HEPACA<br>M2 | 389.74<br>66432 | 82.04177109 | 697.4515154 | 8.5011<br>75756 | 3.08766<br>2387      | 9.44E-<br>08    | 4.73E-<br>05    | Up   |
| HGF          | 245.08          | 352.3073585 | 137.8665323 | 0.3913          | -                    | 0.0070          | 0.1376          | Down |

|        |                 |             |             |                 |                      |                 |                 |          |
|--------|-----------------|-------------|-------------|-----------------|----------------------|-----------------|-----------------|----------|
|        | 69454           |             |             | 24589           | 1.35356<br>2329      | 43968           | 87078           | n        |
| HHIPL1 | 428.93<br>54726 | 729.3453978 | 128.5255473 | 0.1762<br>20413 | -<br>2.50454<br>7041 | 1.83E-<br>06    | 0.0005<br>21221 | Dow<br>n |
| HIC1   | 315.41<br>44497 | 469.0807783 | 161.7481211 | 0.3448<br>19333 | -<br>1.53608<br>743  | 0.0006<br>51085 | 0.0313<br>10458 | Dow<br>n |
| HIF3A  | 135.77<br>32292 | 240.1801684 | 31.36629006 | 0.1305<br>94837 | -<br>2.93683<br>0228 | 0.0081<br>64478 | 0.1483<br>04852 | Dow<br>n |
| HJURP  | 103.50<br>01118 | 167.4794251 | 39.52079857 | 0.2359<br>74052 | -<br>2.08329<br>9867 | 0.0027<br>64846 | 0.0801<br>93898 | Dow<br>n |
| HMCN1  | 934.40<br>70934 | 1560.254569 | 308.559618  | 0.1977<br>62355 | -<br>2.33816<br>0266 | 0.0001<br>28261 | 0.0101<br>33618 | Dow<br>n |
| HMGA1  | 494.50<br>0872  | 240.6263434 | 748.3754007 | 3.1101<br>14172 | 1.63696<br>7543      | 0.0075<br>71958 | 0.1435<br>49614 | Up       |
| HOMER2 | 518.34<br>36459 | 207.7053025 | 828.9819893 | 3.9911<br>45048 | 1.99680<br>2711      | 0.0002<br>12535 | 0.0146<br>4344  | Up       |
| HOMER3 | 528.07<br>4799  | 827.9767411 | 228.1728569 | 0.2755<br>78824 | -<br>1.85946<br>306  | 0.0003<br>67466 | 0.0206<br>50456 | Dow<br>n |
| HOOK1  | 349.00<br>1415  | 186.2449971 | 511.7578329 | 2.7477<br>66871 | 1.45825<br>9607      | 0.0200<br>42485 | 0.2597<br>76641 | Up       |
| HOOK2  | 629.68<br>99181 | 361.7650945 | 897.6147416 | 2.4812<br>08815 | 1.311043<br>156      | 0.0161<br>6716  | 0.2286<br>65812 | Up       |
| HOXA10 | 131.31<br>47047 | 239.6508231 | 22.97858637 | 0.0958<br>83611 | -<br>3.38257<br>1943 | 0.0156<br>39596 | 0.2251<br>77623 | Dow<br>n |
| HOXA11 | 17.375<br>94645 | 33.22429237 | 1.527600538 | 0.0459<br>78422 | -<br>4.44289<br>9234 | 0.0002<br>56296 | 0.0162<br>28778 | Dow<br>n |
| HOXC10 | 196.90<br>39415 | 339.8610119 | 53.94687114 | 0.1587<br>32156 | -<br>2.65533<br>3676 | 5.18E-<br>05    | 0.0054<br>43053 | Dow<br>n |
| HOXC4  | 96.569<br>39653 | 137.0306099 | 56.1081832  | 0.4094<br>57298 | -<br>1.28821<br>5094 | 0.0339<br>83819 | 0.3480<br>24493 | Dow<br>n |
| HOXC5  | 19.802<br>15177 | 32.63363899 | 6.970664544 | 0.2136<br>03654 | -<br>2.22699<br>1766 | 0.0204<br>46105 | 0.2623<br>69556 | Dow<br>n |
| HOXC6  | 641.76          | 1016.434918 | 267.1022784 | 0.2627          | -                    | 0.0001          | 0.0101          | Dow      |

|              |                 |             |             |                 |                      |                 |                 |          |
|--------------|-----------------|-------------|-------------|-----------------|----------------------|-----------------|-----------------|----------|
|              | 85983           |             |             | 83454           | 1.92805<br>3656      | 29044           | 33618           | n        |
| HOXC8        | 285.91<br>53812 | 450.5148294 | 121.315933  | 0.2692<br>82885 | -<br>1.89280<br>5556 | 0.0013<br>67399 | 0.0495<br>76481 | Dow<br>n |
| HOXC9        | 125.50<br>636   | 177.4931485 | 73.5195715  | 0.4142<br>10758 | -<br>1.27156<br>3072 | 0.0112<br>0188  | 0.1848<br>10458 | Dow<br>n |
| HOXD3        | 406.80<br>94762 | 547.7514445 | 265.8675079 | 0.4853<br>79839 | -<br>1.04281<br>391  | 0.0169<br>26969 | 0.2357<br>84411 | Dow<br>n |
| HOXD4        | 460.43<br>00661 | 650.772459  | 270.0876732 | 0.4150<br>26281 | -<br>1.26872<br>54   | 0.0039<br>53362 | 0.0998<br>09354 | Dow<br>n |
| HOXD8        | 337.71<br>75811 | 462.3070637 | 213.1280984 | 0.4610<br>09825 | -<br>1.117130<br>598 | 0.0127<br>59974 | 0.2000<br>54592 | Dow<br>n |
| HPDL         | 39.266<br>68779 | 15.15630681 | 63.37706876 | 4.1815<br>6412  | 2.06404<br>2685      | 0.0058<br>46476 | 0.1231<br>80712 | Up       |
| HPGDS        | 8.5971<br>08609 | 15.9338436  | 1.26037362  | 0.0791<br>00414 | -<br>3.66017<br>095  | 0.0097<br>34221 | 0.1672<br>89951 | Dow<br>n |
| HPN          | 2175.5<br>21133 | 877.7648285 | 3473.277437 | 3.9569<br>56721 | 1.98439<br>1286      | 0.0003<br>38992 | 0.0194<br>76328 | Up       |
| HPSE2        | 106.82<br>80999 | 176.6201739 | 37.03602599 | 0.2096<br>93067 | -<br>2.25364<br>8931 | 0.0437<br>14603 | 0.3988<br>43073 | Dow<br>n |
| HS3ST2       | 65.400<br>34386 | 122.7325538 | 8.068133886 | 0.0657<br>37521 | -<br>3.92713<br>9128 | 0.0036<br>59645 | 0.0955<br>1726  | Dow<br>n |
| HS3ST3B<br>1 | 16.157<br>60575 | 6.526733607 | 25.7884779  | 3.9512<br>07365 | 1.98229<br>3563      | 0.0415<br>75869 | 0.3867<br>86779 | Up       |
| HS6ST2       | 114.18<br>2865  | 45.07554751 | 183.2901825 | 4.0662<br>88545 | 2.02371<br>2593      | 0.0117<br>45428 | 0.1907<br>70149 | Up       |
| HSD11B1      | 115.15<br>03359 | 213.0306759 | 17.26999584 | 0.0810<br>68117 | -<br>3.62472<br>155  | 0.0037<br>5301  | 0.0961<br>40131 | Dow<br>n |
| HSPA12A      | 517.44<br>79466 | 730.9964595 | 303.8994337 | 0.4157<br>33113 | -<br>1.26627<br>0432 | 0.0175<br>48092 | 0.2407<br>91408 | Dow<br>n |
| HSPA2        | 997.42<br>89148 | 1479.072233 | 515.7855965 | 0.3487<br>22385 | -<br>1.51984<br>912  | 0.0076<br>43924 | 0.1436<br>3708  | Dow<br>n |
| HSPA4L       | 223.91          | 103.0389511 | 344.7995951 | 3.3463          | 1.74256              | 0.0224          | 0.2753          | Up       |

|         |                 |             |             |                 |                      |                 |                 |          |
|---------|-----------------|-------------|-------------|-----------------|----------------------|-----------------|-----------------|----------|
|         | 92731           |             |             | 03426           | 8268                 | 55543           | 4556            |          |
| HSPB6   | 4173.5<br>23945 | 7812.571616 | 534.4762748 | 0.0684<br>12336 | -<br>3.86959<br>9696 | 0.0015<br>93099 | 0.0556<br>28549 | Dow<br>n |
| HSPB7   | 370.30<br>2306  | 671.0220582 | 69.58255379 | 0.1036<br>96373 | -<br>3.26956<br>2658 | 0.0127<br>16894 | 0.1999<br>81294 | Dow<br>n |
| HTR2A   | 108.61<br>36092 | 188.8176824 | 28.409536   | 0.1504<br>60146 | -<br>2.73254<br>6703 | 0.0056<br>6741  | 0.1207<br>54788 | Dow<br>n |
| HTRA1   | 8477.4<br>31651 | 12560.57588 | 4394.287427 | 0.3498<br>47608 | -<br>1.51520<br>1467 | 0.0014<br>10201 | 0.0506<br>18049 | Dow<br>n |
| HTRA3   | 1641.8<br>66222 | 2706.884745 | 576.8476985 | 0.2131<br>03901 | -<br>2.23037<br>1093 | 0.0001<br>00955 | 0.0086<br>04179 | Dow<br>n |
| HYAL1   | 332.76<br>64544 | 461.2157954 | 204.3171133 | 0.4429<br>96782 | -<br>1.17463<br>1875 | 0.0215<br>98894 | 0.2692<br>75749 | Dow<br>n |
| ID2     | 1383.5<br>78419 | 1987.652563 | 779.5042743 | 0.3921<br>73305 | -<br>1.35043<br>676  | 0.0403<br>11257 | 0.3815<br>3544  | Dow<br>n |
| IER3    | 760.94<br>28815 | 1216.413914 | 305.4718484 | 0.2511<br>24921 | -<br>1.99352<br>2889 | 0.0277<br>34727 | 0.3094<br>98642 | Dow<br>n |
| IFI44L  | 476.62<br>04514 | 248.7763473 | 704.4645555 | 2.8317<br>18381 | 1.50167<br>7794      | 0.0029<br>53759 | 0.0841<br>79793 | Up       |
| IFIH1   | 467.43<br>87374 | 278.1936747 | 656.6838002 | 2.3605<br>27431 | 1.23910<br>9248      | 0.0143<br>84485 | 0.2144<br>9104  | Up       |
| IFITM10 | 16.900<br>7201  | 5.134643725 | 28.66679647 | 5.5830<br>15688 | 2.48104<br>461       | 0.0173<br>00423 | 0.2389<br>50465 | Up       |
| IFNLR1  | 30.197<br>66038 | 10.03129719 | 50.36402356 | 5.0206<br>89008 | 2.32788<br>5364      | 0.0229<br>4972  | 0.2790<br>32639 | Up       |
| IGDCC4  | 669.52<br>28733 | 1258.954163 | 80.09158312 | 0.0636<br>17553 | -<br>3.97443<br>1311 | 0.0145<br>28045 | 0.2160<br>00543 | Dow<br>n |
| IGF1    | 2355.5<br>14413 | 4375.723152 | 335.3056731 | 0.0766<br>28631 | -<br>3.70597<br>2665 | 0.0001<br>45681 | 0.0110<br>07514 | Dow<br>n |
| IGFALS  | 89.701<br>2045  | 154.8579785 | 24.54443053 | 0.1584<br>9639  | -<br>2.65747<br>8115 | 2.62E-<br>05    | 0.0032<br>69438 | Dow<br>n |
| IGFBP4  | 8101.6<br>98126 | 13401.3971  | 2801.999149 | 0.2090<br>82615 | -<br>2.25785         | 1.17E-<br>05    | 0.0018<br>13817 | Dow<br>n |

|        |                 |             |             |                 |                      |                 |                 |          |
|--------|-----------------|-------------|-------------|-----------------|----------------------|-----------------|-----------------|----------|
|        |                 |             |             |                 | 4988                 |                 |                 |          |
| IGFBP5 | 8996.2<br>56168 | 13647.7638  | 4344.748539 | 0.3183<br>4875  | -<br>1.65131<br>9997 | 0.0102<br>86785 | 0.1748<br>46172 | Dow<br>n |
| IGFBP6 | 3563.5<br>31147 | 5676.009801 | 1451.052493 | 0.2556<br>4658  | -<br>1.96777<br>7369 | 3.15E-<br>05    | 0.0037<br>78567 | Dow<br>n |
| IPLL1  | 5439.6<br>54909 | 3591.405457 | 7287.904361 | 2.0292<br>62484 | 1.02095<br>5489      | 0.0321<br>63912 | 0.3361<br>17932 | Up       |
| IGSF1  | 35.329<br>057   | 67.94136245 | 2.716751551 | 0.0399<br>8671  | -<br>4.64433<br>5608 | 0.0008<br>5112  | 0.0373<br>30936 | Dow<br>n |
| IGSF11 | 22.831<br>27032 | 42.24365051 | 3.418890118 | 0.0809<br>32639 | -<br>3.62713<br>4551 | 0.0061<br>3797  | 0.1273<br>23742 | Dow<br>n |
| IGSF5  | 278.03<br>51988 | 82.04502118 | 474.0253764 | 5.7776<br>25133 | 2.53047<br>6601      | 0.0481<br>23889 | 0.4204<br>12522 | Up       |
| IKBIP  | 855.47<br>8467  | 1217.770394 | 493.1865399 | 0.4049<br>91403 | -<br>1.30403<br>6813 | 0.0118<br>36282 | 0.1912<br>41559 | Dow<br>n |
| IKBKE  | 1937.4<br>2838  | 1016.301842 | 2858.554918 | 2.8127<br>02684 | 1.49195<br>7061      | 0.0071<br>78455 | 0.1388<br>06625 | Up       |
| IL15RA | 407.19<br>7813  | 156.2170418 | 658.1785843 | 4.2132<br>31648 | 2.07492<br>7239      | 0.0145<br>84607 | 0.2162<br>20103 | Up       |
| IL17D  | 180.43<br>26897 | 272.9482549 | 87.91712438 | 0.3221<br>01801 | -<br>1.634411<br>369 | 0.0033<br>07371 | 0.0890<br>11076 | Dow<br>n |
| IL18   | 306.30<br>23123 | 480.5527062 | 132.0519183 | 0.2747<br>91748 | -<br>1.86358<br>9412 | 0.0399<br>20276 | 0.3806<br>98819 | Dow<br>n |
| IL18BP | 1900.8<br>60159 | 402.514527  | 3399.205792 | 8.4449<br>26987 | 3.07808<br>495       | 0.0091<br>98991 | 0.1607<br>96121 | Up       |
| IL1RAP | 667.38<br>2962  | 281.9862047 | 1052.779719 | 3.7334<br>44054 | 1.90050<br>7112      | 0.0471<br>60033 | 0.4168<br>27454 | Up       |
| IL1RN  | 906.94<br>77885 | 179.4822259 | 1634.413351 | 9.1062<br>68559 | 3.18686<br>0007      | 0.0189<br>93226 | 0.2505<br>90744 | Up       |
| IL20RA | 236.50<br>28168 | 39.02914534 | 433.9764883 | 11.119<br>29264 | 3.47499<br>3107      | 9.05E-<br>09    | 7.75E-<br>06    | Up       |
| IL2RB  | 437.66<br>15135 | 216.8128063 | 658.5102207 | 3.0372<br>29359 | 1.60275<br>5859      | 0.0065<br>02341 | 0.1313<br>83818 | Up       |
| IL2RG  | 425.22<br>90694 | 260.4380667 | 590.0200722 | 2.2654<br>90908 | 1.17982<br>3701      | 0.0190<br>50368 | 0.2509<br>7639  | Up       |
| IL34   | 1656.5<br>59197 | 604.742122  | 2708.376273 | 4.4785<br>6396  | 2.16303<br>621       | 0.0389<br>64864 | 0.3765<br>2077  | Up       |

|        |                 |             |             |                 |                      |                 |                 |      |
|--------|-----------------|-------------|-------------|-----------------|----------------------|-----------------|-----------------|------|
| IL7    | 103.49<br>75333 | 64.98874725 | 142.0063193 | 2.1850<br>90885 | 1.12769<br>3287      | 0.0470<br>25368 | 0.4163<br>74787 | Up   |
| ILDR1  | 166.68<br>4129  | 66.75822099 | 266.6100371 | 3.9936<br>65996 | 1.99771<br>368       | 0.0007<br>98214 | 0.0357<br>07162 | Up   |
| ILK    | 4174.3<br>41041 | 5618.918232 | 2729.763849 | 0.4858<br>16617 | -<br>1.04151<br>6257 | 0.0420<br>95697 | 0.3908<br>14102 | Down |
| IMPA2  | 543.90<br>97618 | 232.4918786 | 855.327645  | 3.6789<br>5709  | 1.87929<br>6849      | 0.0010<br>60118 | 0.0417<br>15746 | Up   |
| INADL  | 694.82<br>49193 | 442.1155946 | 947.534244  | 2.1431<br>82135 | 1.09975<br>4461      | 0.0348<br>9731  | 0.3538<br>76846 | Up   |
| INPP5A | 1600.1<br>57111 | 2303.399312 | 896.9149104 | 0.3893<br>87505 | -<br>1.36072<br>1505 | 0.0420<br>87954 | 0.3908<br>14102 | Down |
| IQGAP3 | 157.62<br>09276 | 261.7353663 | 53.50648899 | 0.2044<br>29725 | -<br>2.29032<br>3108 | 0.0005<br>55666 | 0.0279<br>90326 | Down |
| IRF6   | 753.32<br>64653 | 328.6945775 | 1177.958353 | 3.5837<br>47447 | 1.84146<br>8972      | 0.0036<br>98135 | 0.0959<br>64724 | Up   |
| IRF7   | 507.07<br>94112 | 302.8564801 | 711.3023424 | 2.3486<br>44949 | 1.23182<br>8634      | 0.0182<br>22364 | 0.2452<br>79022 | Up   |
| IRX4   | 442.75<br>52056 | 189.3328775 | 696.1775337 | 3.6770<br>02869 | 1.87853<br>0302      | 0.0264<br>08802 | 0.3012<br>86255 | Up   |
| ISG20  | 162.67<br>17956 | 84.0903152  | 241.253276  | 2.8689<br>78138 | 1.52053<br>6975      | 0.0088<br>55542 | 0.1572<br>05536 | Up   |
| ISL2   | 73.838<br>10396 | 135.2341598 | 12.44204813 | 0.0920<br>03737 | -<br>3.44216<br>3721 | 0.0036<br>89124 | 0.0958<br>69237 | Down |
| ISLR   | 1126.7<br>79418 | 1787.172883 | 466.3859525 | 0.2609<br>62975 | -<br>1.93808<br>296  | 0.0002<br>01762 | 0.0140<br>63107 | Down |
| ISLR2  | 263.93<br>05501 | 455.3547293 | 72.50637085 | 0.1592<br>30521 | -<br>2.650811<br>198 | 0.0299<br>34963 | 0.3237<br>04409 | Down |
| ITFG3  | 1014.3<br>23566 | 1352.966698 | 675.680434  | 0.4994<br>06552 | -<br>1.00171<br>3345 | 0.0409<br>76019 | 0.3847<br>36043 | Down |
| ITGA11 | 1891.9<br>85653 | 3614.263506 | 169.7077995 | 0.0469<br>55016 | -<br>4.41257<br>6917 | 0.0011<br>64773 | 0.0447<br>56666 | Down |
| ITGA2  | 194.42<br>04342 | 92.47288331 | 296.3679851 | 3.2049<br>1775  | 1.68028<br>7332      | 0.0062<br>22528 | 0.1280<br>31719 | Up   |
| ITGA5  | 7428.8<br>18989 | 12182.70825 | 2674.929723 | 0.2195<br>6774  | -<br>2.18726         | 0.0131<br>54917 | 0.2041<br>53801 | Down |

|          |                 |             |             |                 |                      |                 |                 |      |  |
|----------|-----------------|-------------|-------------|-----------------|----------------------|-----------------|-----------------|------|--|
|          |                 |             |             |                 | 199                  |                 |                 |      |  |
| ITGA7    | 2613.0<br>62534 | 4390.976452 | 835.1486161 | 0.1901<br>9656  | -<br>2.39443<br>6942 | 0.0083<br>26354 | 0.1504<br>85253 | Down |  |
| ITGA8    | 1930.2<br>04613 | 3517.11985  | 343.2893757 | 0.0976<br>05254 | -<br>3.35689<br>7383 | 0.0137<br>27113 | 0.2088<br>72938 | Down |  |
| ITGA9    | 529.75<br>36751 | 793.8545633 | 265.6527869 | 0.3346<br>36594 | -<br>1.57933<br>2878 | 0.0031<br>7798  | 0.0867<br>21734 | Down |  |
| ITGB1    | 23355.<br>45079 | 32216.79603 | 14494.10555 | 0.4498<br>9283  | -<br>1.15234<br>6719 | 0.0169<br>95948 | 0.2362<br>13617 | Down |  |
| ITGB5    | 4012.9<br>47945 | 6019.754976 | 2006.140914 | 0.3332<br>59563 | -<br>1.58528<br>1819 | 0.0012<br>62894 | 0.0471<br>17459 | Down |  |
| ITGB6    | 1037.6<br>23187 | 180.7564442 | 1894.48993  | 10.480<br>89842 | 3.38969<br>0484      | 0.0003<br>28652 | 0.0190<br>64999 | Up   |  |
| ITGB8    | 96.504<br>96673 | 53.88785081 | 139.1220827 | 2.5816<br>96626 | 1.36831<br>948       | 0.0427<br>90125 | 0.3940<br>06561 | Up   |  |
| ITGBL1   | 1038.4<br>32248 | 1878.788364 | 198.0761329 | 0.1054<br>27592 | -<br>3.24567<br>5605 | 0.0215<br>6737  | 0.2692<br>75749 | Down |  |
| ITIH2    | 234.25<br>30985 | 18.2320418  | 450.2741551 | 24.696<br>85842 | 4.62625<br>563       | 0.0045<br>3875  | 0.1070<br>48899 | Up   |  |
| ITIH5    | 3086.6<br>43463 | 5274.452291 | 898.8346361 | 0.1704<br>12886 | -<br>2.55289<br>3665 | 0.0009<br>31444 | 0.0386<br>9573  | Down |  |
| ITK      | 155.09<br>23338 | 81.00245972 | 229.1822079 | 2.8293<br>24057 | 1.50045<br>7425      | 0.0433<br>31414 | 0.3967<br>5602  | Up   |  |
| ITPRIPL2 | 1293.7<br>22896 | 1788.214215 | 799.2315762 | 0.4469<br>43979 | -<br>1.16183<br>4084 | 0.0194<br>25593 | 0.2531<br>8274  | Down |  |
| JADE1    | 2183.5<br>85934 | 2969.065937 | 1398.105931 | 0.4708<br>90833 | -<br>1.08653<br>5458 | 0.0236<br>00858 | 0.2835<br>09845 | Down |  |
| JAZF1    | 258.61<br>5547  | 460.5720096 | 56.65908433 | 0.1230<br>18949 | -<br>3.02304<br>7545 | 0.0019<br>15071 | 0.0621<br>6377  | Down |  |
| JPH2     | 1855.7<br>92099 | 3068.190319 | 643.3938783 | 0.2096<br>98164 | -<br>2.25361<br>3861 | 0.0399<br>43848 | 0.3806<br>98819 | Down |  |
| JUND     | 2544.6<br>15184 | 3526.96956  | 1562.260809 | 0.4429<br>47063 | -<br>1.17479         | 0.0203<br>54841 | 0.2618<br>31984 | Down |  |

|             |                 |             |             |                 |                      |                 |                 |      |  |
|-------------|-----------------|-------------|-------------|-----------------|----------------------|-----------------|-----------------|------|--|
|             |                 |             |             |                 | 3803                 |                 |                 |      |  |
| KANK1       | 3405.9<br>5557  | 4971.98105  | 1839.93009  | 0.3700<br>59755 | -<br>1.43416<br>9847 | 0.0135<br>08577 | 0.2073<br>28913 | Down |  |
| KANK2       | 3239.3<br>96573 | 4756.770763 | 1722.022383 | 0.3620<br>15003 | -<br>1.46587<br>8606 | 0.0051<br>62151 | 0.1153<br>17974 | Down |  |
| KAZALD<br>1 | 80.532<br>35326 | 132.9306211 | 28.13408544 | 0.2116<br>44881 | -<br>2.24028<br>2502 | 0.0003<br>66214 | 0.0206<br>44582 | Down |  |
| KBTBD12     | 63.042<br>09263 | 125.095819  | 0.98836625  | 0.0079<br>00874 | -<br>6.98377<br>211  | 0.0313<br>92905 | 0.3329<br>77961 | Down |  |
| KCNA6       | 125.50<br>37081 | 213.2348144 | 37.77260184 | 0.1771<br>40876 | -<br>2.49703<br>0935 | 0.0010<br>56992 | 0.0417<br>15746 | Down |  |
| KCNB1       | 379.52<br>20147 | 118.1836148 | 640.8604146 | 5.4225<br>8261  | 2.43898<br>0127      | 0.0360<br>05762 | 0.3604<br>00722 | Up   |  |
| KCNB2       | 48.292<br>8493  | 93.77872368 | 2.806974922 | 0.0299<br>31895 | -<br>5.06217<br>2564 | 9.48E-<br>08    | 4.73E-<br>05    | Down |  |
| KCNE1L      | 16.008<br>63808 | 30.31733149 | 1.699944677 | 0.0560<br>71712 | -<br>4.15658<br>3073 | 0.0027<br>29747 | 0.0795<br>60854 | Down |  |
| KCNE4       | 299.99<br>21544 | 522.0331312 | 77.95117766 | 0.1493<br>22281 | -<br>2.74349<br>8647 | 2.84E-<br>05    | 0.0034<br>97108 | Down |  |
| KCNG1       | 569.53<br>97912 | 1123.268881 | 15.8107013  | 0.0140<br>75616 | -<br>6.15065<br>8141 | 0.0235<br>68886 | 0.2833<br>60894 | Down |  |
| KCNH2       | 196.97<br>46367 | 351.4418638 | 42.50740957 | 0.1209<br>51469 | -<br>3.04749<br>9807 | 0.0286<br>54056 | 0.3148<br>89897 | Down |  |
| KCNJ10      | 36.932<br>80972 | 2.076255109 | 71.78936433 | 34.576<br>36974 | 5.111714<br>5        | 0.0039<br>88448 | 0.0998<br>09354 | Up   |  |
| KCNJ11      | 17.269<br>9106  | 3.132491962 | 31.40732924 | 10.026<br>30801 | 3.32571<br>8554      | 0.0022<br>567   | 0.0690<br>18991 | Up   |  |
| KCNJ15      | 101.00<br>33031 | 43.10147705 | 158.9051291 | 3.6867<br>676   | 1.88235<br>6477      | 0.0061<br>90449 | 0.1276<br>98793 | Up   |  |
| KCNJ8       | 478.06<br>3679  | 733.2168396 | 222.9105184 | 0.3040<br>17183 | -<br>1.71777<br>5226 | 0.0025<br>91546 | 0.0765<br>95778 | Down |  |
| KCNK1       | 402.61<br>11237 | 194.0268029 | 611.1954444 | 3.1500<br>56772 | 1.65537<br>783       | 0.0039<br>7824  | 0.0998<br>09354 | Up   |  |



|               |                 |             |             |                 |                      |                 |                 |      |
|---------------|-----------------|-------------|-------------|-----------------|----------------------|-----------------|-----------------|------|
| KCNK12        | 120.03<br>03819 | 233.3812284 | 6.679535366 | 0.0286<br>20705 | -<br>5.12679<br>6964 | 0.0002<br>27397 | 0.0152<br>01785 | Down |
| KCNK2         | 204.38<br>27122 | 69.33252084 | 339.4329035 | 4.8957<br>24248 | 2.29152<br>23        | 6.15E-<br>05    | 0.0061<br>42806 | Up   |
| KCNQ3         | 7.3941<br>63946 | 13.51851441 | 1.26981348  | 0.0939<br>31437 | -<br>3.41224<br>8115 | 0.0349<br>80166 | 0.3538<br>76846 | Down |
| KCNS3         | 69.020<br>70723 | 99.09521918 | 38.94619529 | 0.3930<br>17903 | -<br>1.34733<br>3061 | 0.0127<br>37597 | 0.1999<br>81294 | Down |
| KCNT1         | 146.15<br>8804  | 93.63348235 | 198.6841256 | 2.1219<br>34597 | 1.08538<br>019       | 0.0446<br>65894 | 0.4038<br>3448  | Up   |
| KCTD1         | 1048.6<br>96026 | 247.7024511 | 1849.6896   | 7.4673<br>85131 | 2.90060<br>314       | 0.0049<br>18887 | 0.1125<br>39884 | Up   |
| KCTD15        | 577.23<br>49604 | 944.6158348 | 209.854086  | 0.2221<br>58128 | -<br>2.17034<br>1166 | 0.0030<br>61627 | 0.0853<br>46759 | Down |
| KCTD9         | 672.86<br>65771 | 991.2304212 | 354.5027331 | 0.3576<br>39077 | -<br>1.48342<br>3715 | 0.0046<br>8533  | 0.1094<br>23747 | Down |
| KDELC2        | 1175.7<br>22362 | 1711.704795 | 639.7399295 | 0.3737<br>44311 | -<br>1.41987<br>6475 | 0.0030<br>41209 | 0.0850<br>5454  | Down |
| KDELR3        | 2182.0<br>24548 | 3405.995243 | 958.0538525 | 0.2812<br>84554 | -<br>1.82989<br>7763 | 0.0003<br>17014 | 0.0186<br>91351 | Down |
| KDF1          | 223.26<br>52448 | 107.3067576 | 339.223732  | 3.1612<br>5228  | 1.66049<br>6172      | 0.0042<br>23622 | 0.1025<br>61821 | Up   |
| KERA          | 409.90<br>74195 | 800.3512417 | 19.46359726 | 0.0243<br>18819 | -<br>5.36178<br>3001 | 0.0042<br>75249 | 0.1033<br>35758 | Down |
| KHDRBS<br>3   | 381.45<br>33603 | 558.4909187 | 204.415802  | 0.3660<br>14549 | -<br>1.45002<br>7097 | 0.0065<br>65664 | 0.1314<br>91244 | Down |
| KIAA1147      | 158.47<br>2637  | 95.63430586 | 221.3109681 | 2.3141<br>37862 | 1.21047<br>4814      | 0.0276<br>85084 | 0.3092<br>30348 | Up   |
| KIAA1211      | 137.29<br>7402  | 216.3390025 | 58.25580154 | 0.2692<br>80161 | -<br>1.89282<br>0148 | 0.0011<br>89702 | 0.0453<br>88121 | Down |
| KIAA1211<br>L | 274.99<br>00711 | 117.5349392 | 432.4452029 | 3.6792<br>9065  | 1.87942<br>7648      | 0.0013<br>01113 | 0.0483<br>42803 | Up   |
| KIAA124<br>4  | 883.43<br>8333  | 535.1138029 | 1231.762863 | 2.3018<br>70847 | 1.20280<br>689       | 0.0250<br>77295 | 0.2922<br>65063 | Up   |

|               |                 |             |             |                 |                      |                 |                 |          |
|---------------|-----------------|-------------|-------------|-----------------|----------------------|-----------------|-----------------|----------|
| KIAA132<br>4L | 164.17<br>29091 | 275.6621162 | 52.68370197 | 0.1911<br>16947 | -<br>2.38747<br>2384 | 0.0108<br>16936 | 0.1811<br>47449 | Dow<br>n |
| KIAA152<br>2  | 1379.3<br>94867 | 705.9789511 | 2052.810784 | 2.9077<br>50692 | 1.53990<br>3579      | 0.0044<br>74315 | 0.1061<br>49878 | Up       |
| KIAA161<br>4  | 287.10<br>18329 | 419.3289364 | 154.8747293 | 0.3693<br>39475 | -<br>1.43698<br>0628 | 0.0029<br>91982 | 0.0848<br>05899 | Dow<br>n |
| KIAA171<br>5  | 530.03<br>58568 | 721.2982087 | 338.7735049 | 0.4696<br>71907 | -<br>1.09027<br>4793 | 0.0466<br>01162 | 0.4146<br>50141 | Dow<br>n |
| KIF18B        | 69.917<br>19747 | 108.7405178 | 31.09387714 | 0.2859<br>45642 | -<br>1.80618<br>7178 | 0.0270<br>39061 | 0.3056<br>21268 | Dow<br>n |
| KIF1A         | 448.10<br>39375 | 209.2995309 | 686.908344  | 3.2819<br>39242 | 1.71454<br>8531      | 0.0058<br>2403  | 0.1231<br>80712 | Up       |
| KIF20A        | 186.91<br>02952 | 304.8492203 | 68.9713702  | 0.2262<br>47488 | -<br>2.14402<br>6323 | 0.0011<br>93826 | 0.0453<br>88121 | Dow<br>n |
| KIF21A        | 214.05<br>5692  | 130.0982716 | 298.0131125 | 2.2906<br>76954 | 1.19577<br>4015      | 0.0403<br>96321 | 0.3820<br>20813 | Up       |
| KIF7          | 679.69<br>89677 | 1032.756917 | 326.6410181 | 0.3162<br>80639 | -<br>1.66072<br>2848 | 0.0016<br>76055 | 0.0571<br>92597 | Dow<br>n |
| KIFC2         | 430.17<br>7526  | 637.2264851 | 223.1285669 | 0.3501<br>55827 | -<br>1.51393<br>0999 | 0.0027<br>90587 | 0.0805<br>21626 | Dow<br>n |
| KIR2DL5<br>A  | 52.254<br>92056 | 8.894147955 | 95.61569317 | 10.750<br>40506 | 3.42631<br>9114      | 0.0072<br>83003 | 0.1400<br>75128 | Up       |
| KIR2DS1       | 57.413<br>61992 | 13.60355107 | 101.2236888 | 7.4409<br>75392 | 2.89549<br>1748      | 6.87E-<br>05    | 0.0065<br>91825 | Up       |
| KIRREL        | 2431.9<br>05389 | 3574.553403 | 1289.257375 | 0.3606<br>7649  | -<br>1.47122<br>2707 | 0.0060<br>80256 | 0.1266<br>99009 | Dow<br>n |
| KLC3          | 56.899<br>33075 | 15.14141856 | 98.65724294 | 6.5157<br>19946 | 2.70392<br>4596      | 0.0002<br>37665 | 0.0154<br>85252 | Up       |
| KLF4          | 1331.1<br>16974 | 2097.907634 | 564.3263153 | 0.2689<br>94834 | -<br>1.89434<br>9629 | 0.0048<br>35431 | 0.1110<br>54351 | Dow<br>n |
| KLF5          | 530.81<br>30953 | 163.7007398 | 897.9254508 | 5.4851<br>64283 | 2.45553<br>4831      | 0.0006<br>52704 | 0.0313<br>10458 | Up       |
| KLHDC7<br>A   | 548.06<br>43936 | 205.2819812 | 890.8468061 | 4.3396<br>24944 | 2.117570<br>362      | 0.0406<br>84247 | 0.3832<br>503   | Up       |
| KLHL29        | 177.98          | 265.2490035 | 90.73009597 | 0.3420          | -                    | 0.0061          | 0.1273          | Dow      |

|             |                 |             |             |                 |                      |                 |                 |      |
|-------------|-----------------|-------------|-------------|-----------------|----------------------|-----------------|-----------------|------|
|             | 95498           |             |             | 56312           | 1.54769<br>4241      | 43815           | 23742           | n    |
| KLHL3       | 248.40<br>9163  | 337.3812965 | 159.4370295 | 0.4725<br>72224 | -<br>1.08139<br>326  | 0.0214<br>75117 | 0.2685<br>71055 | Down |
| KLHL30      | 33.236<br>31453 | 62.72006986 | 3.75255919  | 0.0598<br>30278 | -<br>4.06298<br>0433 | 0.0291<br>84477 | 0.3185<br>88632 | Down |
| KLHL32      | 106.57<br>15316 | 188.3789682 | 24.76409501 | 0.1314<br>58916 | -<br>2.92731<br>6098 | 0.0022<br>74935 | 0.0693<br>39246 | Down |
| KLHL4       | 57.825<br>02254 | 88.18609335 | 27.46395174 | 0.3114<br>31777 | -<br>1.683011<br>939 | 0.0023<br>92683 | 0.0720<br>73066 | Down |
| KLHL40      | 277.79<br>58235 | 94.18074191 | 461.4109051 | 4.8992<br>06523 | 2.29254<br>8109      | 0.0185<br>35292 | 0.2472<br>0819  | Up   |
| KLK14       | 9.5695<br>86403 | 18.90038651 | 0.238786293 | 0.0126<br>33937 | -<br>6.30655<br>1903 | 0.0010<br>21081 | 0.0409<br>12776 | Down |
| KLK7        | 489.58<br>93504 | 925.3935177 | 53.78518308 | 0.0581<br>21418 | -<br>4.10478<br>6299 | 4.55E-<br>12    | 9.08E-<br>09    | Down |
| KLRC1       | 10.667<br>87089 | 3.200945179 | 18.13479659 | 5.6654<br>5054  | 2.50219<br>069       | 0.0343<br>99223 | 0.3512<br>78376 | Up   |
| KLRD1       | 76.648<br>97821 | 23.52735139 | 129.770605  | 5.5157<br>33705 | 2.46355<br>2806      | 0.0002<br>67143 | 0.0165<br>87444 | Up   |
| KNG1        | 7.7242<br>09737 | 1.368330455 | 14.08008902 | 10.289<br>97708 | 3.36316<br>7864      | 0.0427<br>5251  | 0.3938<br>6188  | Up   |
| KREMEN<br>2 | 31.983<br>99701 | 9.067272986 | 54.90072104 | 6.0548<br>21679 | 2.59808<br>4472      | 0.0453<br>18805 | 0.4070<br>76959 | Up   |
| KRT14       | 1707.3<br>18408 | 233.2571504 | 3181.379665 | 13.638<br>93737 | 3.76965<br>9341      | 0.0136<br>46129 | 0.2082<br>83578 | Up   |
| KRT17       | 4882.2<br>75792 | 771.4989704 | 8993.052613 | 11.656<br>59704 | 3.54307<br>4773      | 1.67E-<br>10    | 2.50E-<br>07    | Up   |
| KRT18       | 955.94<br>66617 | 301.4850995 | 1610.408224 | 5.3415<br>84797 | 2.41726<br>7839      | 0.0006<br>57128 | 0.0313<br>45186 | Up   |
| KRT5        | 11033.<br>05929 | 1828.204265 | 20237.91431 | 11.069<br>83213 | 3.46856<br>1439      | 0.0002<br>0397  | 0.0141<br>62101 | Up   |
| KRT6A       | 6.4651<br>87429 | 0.3302029   | 12.60017196 | 38.158<br>87733 | 5.25394<br>6822      | 0.0101<br>2789  | 0.1729<br>27878 | Up   |
| KRT7        | 3289.7<br>70196 | 1068.243234 | 5511.297158 | 5.1592<br>15599 | 2.36715<br>1737      | 7.88E-<br>06    | 0.0013<br>95796 | Up   |
| KRT75       | 44.670<br>74033 | 1.722292782 | 87.61918787 | 50.873<br>57318 | 5.66884<br>4522      | 0.0153<br>26087 | 0.2229<br>84649 | Up   |

|         |                 |             |             |                 |                      |                 |                 |      |
|---------|-----------------|-------------|-------------|-----------------|----------------------|-----------------|-----------------|------|
| KRT8    | 3158.3<br>83393 | 712.1889819 | 5604.577803 | 7.8695<br>09282 | 2.97627<br>3677      | 0.0003<br>99322 | 0.0220<br>27603 | Up   |
| KY      | 5.2459<br>96736 | 10.49199347 | 0           | 0               | #NAME<br>?           | 0.0141<br>63455 | 0.2122<br>51175 | Down |
| KYNU    | 81.510<br>85617 | 36.56782315 | 126.4538892 | 3.4580<br>64448 | 1.78996<br>4757      | 0.0090<br>64091 | 0.1591<br>79242 | Up   |
| LACTBL1 | 14.904<br>06391 | 28.80554125 | 1.002586562 | 0.0348<br>05337 | -<br>4.84454<br>7658 | 0.0277<br>62051 | 0.3094<br>98642 | Down |
| LAD1    | 690.26<br>01322 | 229.8475423 | 1150.672722 | 5.0062<br>43314 | 2.32372<br>8411      | 1.86E-<br>05    | 0.0025<br>248   | Up   |
| LAMA2   | 1636.3<br>29117 | 2548.356229 | 724.3020056 | 0.2842<br>23217 | -<br>1.81490<br>3687 | 9.37E-<br>05    | 0.0081<br>27365 | Down |
| LAMA4   | 8323.4<br>76149 | 12776.92094 | 3870.031355 | 0.3028<br>9233  | -<br>1.72312<br>3049 | 0.0002<br>83955 | 0.0171<br>35422 | Down |
| LAMB1   | 7375.9<br>26628 | 9993.189387 | 4758.663869 | 0.4761<br>90702 | -<br>1.07038<br>8644 | 0.0078<br>76357 | 0.1458<br>36369 | Down |
| LAMB2   | 12383.<br>23169 | 18881.27306 | 5885.190327 | 0.3116<br>94572 | -<br>1.68179<br>5063 | 0.0005<br>6435  | 0.0282<br>14009 | Down |
| LAMB3   | 1261.7<br>61165 | 607.0309773 | 1916.491354 | 3.1571<br>55772 | 1.65862<br>5444      | 0.0016<br>67387 | 0.0570<br>14889 | Up   |
| LAMC1   | 16268.<br>08822 | 24748.28934 | 7787.887108 | 0.3146<br>83856 | -<br>1.66802<br>493  | 0.0005<br>85169 | 0.0289<br>45751 | Down |
| LAMC2   | 790.40<br>04604 | 292.1471468 | 1288.653774 | 4.4109<br>75045 | 2.14109<br>7599      | 7.76E-<br>05    | 0.0071<br>58621 | Up   |
| LAP3    | 2661.3<br>02685 | 1548.870306 | 3773.735065 | 2.4364<br>43548 | 1.28477<br>6796      | 0.0092<br>6085  | 0.1613<br>73906 | Up   |
| LBP     | 3494.4<br>25132 | 726.9585743 | 6261.891689 | 8.6138<br>21902 | 3.10665<br>3495      | 0.0213<br>47726 | 0.2682<br>71244 | Up   |
| LCAT    | 963.63<br>96349 | 1400.678484 | 526.6007855 | 0.3759<br>61216 | -<br>1.411344<br>255 | 0.0037<br>24369 | 0.0961<br>00187 | Down |
| LCK     | 263.59<br>30048 | 151.5469961 | 375.6390135 | 2.4786<br>96531 | 1.30958<br>1652      | 0.0120<br>43848 | 0.1935<br>00973 | Up   |
| LCN2    | 2485.3<br>04271 | 1049.815104 | 3920.793439 | 3.7347<br>46647 | 1.90101<br>0379      | 0.0450<br>03197 | 0.4052<br>54125 | Up   |
| LCNL1   | 219.53<br>02114 | 22.41432852 | 416.6460943 | 18.588<br>38171 | 4.21632<br>9271      | 0.0068<br>01066 | 0.1342<br>51998 | Up   |
| LCP1    | 1807.4          | 1176.819263 | 2438.116262 | 2.0717          | 1.05087              | 0.0269          | 0.3048          | Up   |

|             |                 |             |             |                 |                      |                 |                 |      |
|-------------|-----------------|-------------|-------------|-----------------|----------------------|-----------------|-----------------|------|
|             | 67763           |             |             | 84801           | 4156                 | 54683           | 93092           |      |
| LCP2        | 590.46<br>15345 | 390.4733119 | 790.4497571 | 2.0243<br>37472 | 1.01744<br>9818      | 0.0461<br>74152 | 0.4122<br>88866 | Up   |
| LDB2        | 883.88<br>35855 | 1279.973662 | 487.7935087 | 0.3810<br>9652  | -<br>1.39177<br>166  | 0.0041<br>23369 | 0.1014<br>37129 | Down |
| LDHD        | 96.076<br>67305 | 24.97054812 | 167.182798  | 6.6951<br>99369 | 2.74312<br>7017      | 0.0435<br>44408 | 0.3978<br>9588  | Up   |
| LDLRAD<br>1 | 266.87<br>64475 | 44.80580083 | 488.9470943 | 10.912<br>58465 | 3.44792<br>0939      | 6.30E-<br>06    | 0.0012<br>85676 | Up   |
| LDLRAD<br>4 | 2201.4<br>7335  | 3331.313981 | 1071.632719 | 0.3216<br>84694 | -<br>1.63628<br>0801 | 0.0305<br>90357 | 0.3272<br>49487 | Down |
| LEPR        | 17.564<br>42945 | 34.36505864 | 0.763800269 | 0.0222<br>26072 | -<br>5.49160<br>3183 | 0.0003<br>54579 | 0.0202<br>49495 | Down |
| LEPREL2     | 2341.1<br>34432 | 3400.162957 | 1282.105908 | 0.3770<br>719   | -<br>1.40708<br>845  | 0.0050<br>38269 | 0.1136<br>16722 | Down |
| LGALS1      | 6375.0<br>13521 | 10996.06956 | 1753.957479 | 0.1595<br>07674 | -<br>2.64830<br>226  | 2.92E-<br>05    | 0.0035<br>5306  | Down |
| LGALS7      | 55.403<br>81005 | 20.20797602 | 90.59964409 | 4.4833<br>6063  | 2.16458<br>0551      | 0.0015<br>67733 | 0.0550<br>13856 | Up   |
| LGALSL      | 1468.1<br>2723  | 2091.420172 | 844.8342886 | 0.4039<br>52443 | -<br>1.30774<br>2638 | 0.0074<br>66677 | 0.1433<br>60676 | Down |
| LHCGR       | 15.217<br>32256 | 28.9450461  | 1.489599009 | 0.0514<br>63003 | -<br>4.28032<br>0531 | 0.0009<br>94179 | 0.0403<br>57402 | Down |
| LHFP        | 2401.5<br>31582 | 3626.586789 | 1176.476374 | 0.3244<br>03204 | -<br>1.62414<br>0026 | 0.0422<br>49611 | 0.3916<br>36468 | Down |
| LIMS2       | 2876.8<br>93101 | 4294.085796 | 1459.700405 | 0.3399<br>32753 | -<br>1.55667<br>8722 | 0.0286<br>64559 | 0.3148<br>89897 | Down |
| LIPH        | 93.006<br>46045 | 13.91846974 | 172.0944512 | 12.364<br>46638 | 3.62812<br>8073      | 2.11E-<br>07    | 9.26E-<br>05    | Up   |
| LIX1L       | 923.73<br>0521  | 1304.814538 | 542.6465039 | 0.4158<br>80179 | -<br>1.26576<br>0167 | 0.0042<br>90733 | 0.1034<br>31968 | Down |
| LLGL2       | 921.98<br>32547 | 546.6990544 | 1297.267455 | 2.3729<br>09638 | 1.24665<br>7163      | 0.0433<br>86948 | 0.3970<br>62332 | Up   |
| LMNA        | 9864.9          | 13335.69869 | 6394.108495 | 0.4794          | -                    | 0.0338          | 0.3471          | Down |

|                  |                 |             |             |                 |                      |                 |                 |          |
|------------------|-----------------|-------------|-------------|-----------------|----------------------|-----------------|-----------------|----------|
|                  | 03594           |             |             | 73078           | 1.06047<br>8285      | 55408           | 04788           | n        |
| LMX1A            | 38.100<br>00052 | 73.91338069 | 2.286620355 | 0.0309<br>36487 | -<br>5.01454<br>6801 | 0.0058<br>56523 | 0.1231<br>80712 | Dow<br>n |
| LMX1B            | 262.88<br>24631 | 97.05255598 | 428.7123703 | 4.4173<br>2179  | 2.14317<br>1933      | 0.0001<br>39742 | 0.0107<br>46284 | Up       |
| LOC1001<br>37797 | 148.36<br>2164  | 224.0281126 | 72.69621546 | 0.3244<br>95951 | -<br>1.62372<br>7618 | 0.0264<br>74175 | 0.3014<br>90004 | Dow<br>n |
| LOC1001<br>39049 | 9.8718<br>84842 | 2.689142055 | 17.05462763 | 6.3420<br>32991 | 2.66494<br>5382      | 0.0372<br>39714 | 0.3672<br>5366  | Up       |
| LOC1001<br>39101 | 12.885<br>10826 | 1.344571027 | 24.42564549 | 18.166<br>1251  | 4.18317<br>8815      | 0.0019<br>34427 | 0.0625<br>66177 | Up       |
| LOC1002<br>95741 | 83.228<br>83605 | 5.354524682 | 161.1031474 | 30.087<br>29196 | 4.911082<br>356      | 1.24E-<br>10    | 2.03E-<br>07    | Up       |
| LOC1002<br>97621 | 6.2366<br>54966 | 12.22030333 | 0.253006606 | 0.0207<br>03791 | -<br>5.59396<br>1233 | 0.0288<br>96268 | 0.3164<br>27425 | Dow<br>n |
| LOC1002<br>97676 | 3617.1<br>45186 | 2046.840061 | 5187.450312 | 2.5343<br>7013  | 1.34162<br>7237      | 0.0216<br>71319 | 0.2696<br>9919  | Up       |
| LOC1002<br>98868 | 1099.9<br>77827 | 549.0319132 | 1650.923742 | 3.0069<br>72276 | 1.588311<br>566      | 0.0366<br>16445 | 0.3635<br>96645 | Up       |
| LOC1002<br>99281 | 2490.5<br>28223 | 1382.663969 | 3598.392477 | 2.6025<br>06869 | 1.37990<br>1972      | 0.0132<br>90079 | 0.2053<br>22588 | Up       |
| LOC1003<br>00091 | 120.30<br>10469 | 9.625832036 | 230.9762618 | 23.995<br>4594  | 4.58468<br>9529      | 7.31E-<br>06    | 0.0013<br>92975 | Up       |
| LOC1003<br>00510 | 311.71<br>40228 | 203.838049  | 419.5899966 | 2.0584<br>47864 | 1.04155<br>6909      | 0.0414<br>53489 | 0.3862<br>50226 | Up       |
| LOC1003<br>35205 | 237.39<br>74242 | 117.6229695 | 357.1718789 | 3.0365<br>82739 | 1.60244<br>8679      | 0.0367<br>83908 | 0.3642<br>93155 | Up       |
| LOC1003<br>35509 | 15.224<br>18646 | 5.443912262 | 25.00446065 | 4.5931<br>05003 | 2.19946<br>9765      | 0.0448<br>01619 | 0.4046<br>11327 | Up       |
| LOC1003<br>35643 | 21.567<br>38352 | 1.392089882 | 41.74267716 | 29.985<br>61926 | 4.90619<br>8862      | 0.0065<br>64736 | 0.1314<br>91244 | Up       |
| LOC1003<br>36526 | 19.816<br>563   | 32.26555134 | 7.367574664 | 0.2283<br>41818 | -<br>2.13073<br>2997 | 0.0362<br>96945 | 0.3613<br>95383 | Dow<br>n |
| LOC1003<br>36869 | 58.315<br>99229 | 16.56009294 | 100.0718916 | 6.0429<br>54712 | 2.59525<br>413       | 0.0040<br>99553 | 0.1012<br>66855 | Up       |
| LOC1003<br>36949 | 5115.9<br>38727 | 8469.941395 | 1761.936059 | 0.2080<br>22225 | -<br>2.26519<br>0418 | 0.0260<br>99448 | 0.2993<br>28043 | Dow<br>n |
| LOC1008          | 142.72          | 54.04552227 | 231.4059866 | 4.2816          | 2.09817              | 0.0452          | 0.4068          | Up       |

|                  |                 |             |             |                 |                      |                 |                 |          |
|------------------|-----------------|-------------|-------------|-----------------|----------------------|-----------------|-----------------|----------|
| 47119            | 57544           |             |             | 86565           | 9189                 | 4727            | 37764           |          |
| LOC1008<br>47516 | 8.3067<br>44284 | 16.61348857 | 0           | 0               | #NAME<br>?           | 0.0381<br>08781 | 0.3712<br>40634 | Dow<br>n |
| LOC1008<br>47724 | 538.03<br>81076 | 21.95688233 | 1054.119333 | 48.008<br>60692 | 5.58522<br>1168      | 0.0024<br>17161 | 0.0724<br>46336 | Up       |
| LOC1008<br>47999 | 39.023<br>53566 | 62.49747923 | 15.54959209 | 0.2488<br>03508 | -<br>2.00692<br>1266 | 0.0062<br>7395  | 0.1286<br>45163 | Dow<br>n |
| LOC1008<br>48461 | 141.16<br>07915 | 201.6333578 | 80.68822525 | 0.4001<br>72998 | -<br>1.32130<br>4272 | 0.0081<br>31505 | 0.1480<br>04922 | Dow<br>n |
| LOC1008<br>48575 | 259.91<br>01815 | 84.8507289  | 434.9696341 | 5.1262<br>92252 | 2.35791<br>573       | 0.0225<br>21299 | 0.2755<br>10556 | Up       |
| LOC1008<br>48786 | 44.395<br>53509 | 69.73394394 | 19.05712624 | 0.2732<br>83356 | -<br>1.87153<br>0497 | 0.0140<br>32024 | 0.2108<br>08596 | Dow<br>n |
| LOC1008<br>48815 | 2961.1<br>20655 | 1332.387943 | 4589.853368 | 3.4448<br>3256  | 1.78443<br>3861      | 0.0035<br>69892 | 0.0936<br>51879 | Up       |
| LOC1008<br>50276 | 251.56<br>91206 | 355.153351  | 147.9848903 | 0.4166<br>78851 | -<br>1.26299<br>2218 | 0.0228<br>61614 | 0.2785<br>36864 | Dow<br>n |
| LOC1008<br>52118 | 2372.5<br>21894 | 3897.042514 | 848.001273  | 0.2176<br>01237 | -<br>2.20024<br>1335 | 0.0006<br>49692 | 0.0313<br>10458 | Dow<br>n |
| LOC1019<br>02512 | 570.75<br>86823 | 836.7579472 | 304.7594174 | 0.3642<br>14548 | -<br>1.45713<br>9546 | 0.0300<br>13497 | 0.3239<br>69216 | Dow<br>n |
| LOC1019<br>03295 | 6.2056<br>67286 | 0.6604058   | 11.75092877 | 17.793<br>49722 | 4.15327<br>8188      | 0.0231<br>3193  | 0.2803<br>10986 | Up       |
| LOC1019<br>04210 | 174.84<br>65476 | 246.6076521 | 103.085443  | 0.4180<br>13967 | -<br>1.25837<br>6947 | 0.0161<br>54887 | 0.2286<br>65812 | Dow<br>n |
| LOC1019<br>04278 | 68.950<br>70455 | 103.0430214 | 34.85838768 | 0.3382<br>8965  | -<br>1.56366<br>9055 | 0.0033<br>50937 | 0.0895<br>06851 | Dow<br>n |
| LOC1019<br>04723 | 85.462<br>36633 | 13.44607722 | 157.4786554 | 11.711<br>86606 | 3.54989<br>9055      | 0.0046<br>81968 | 0.1094<br>23747 | Up       |
| LOC1019<br>05132 | 46.953<br>82475 | 17.79793001 | 76.10971948 | 4.2763<br>24236 | 2.09637<br>1244      | 0.0463<br>58112 | 0.4133<br>25452 | Up       |
| LOC1019<br>05478 | 176.53<br>11934 | 290.6159133 | 62.44647348 | 0.2148<br>76305 | -<br>2.21842<br>1697 | 0.0101<br>3546  | 0.1729<br>27878 | Dow<br>n |
| LOC1019<br>05551 | 8.8908<br>70324 | 0.3302029   | 17.45153775 | 52.850<br>95238 | 5.72385<br>7564      | 0.0065<br>66153 | 0.1314<br>91244 | Up       |

|                  |                 |             |             |                 |                      |                 |                 |          |
|------------------|-----------------|-------------|-------------|-----------------|----------------------|-----------------|-----------------|----------|
| LOC1019<br>05630 | 143.17<br>95663 | 213.9405947 | 72.41853792 | 0.3384<br>98348 | -<br>1.56277<br>9301 | 0.0047<br>40451 | 0.1099<br>96813 | Dow<br>n |
| LOC1019<br>05885 | 49.865<br>47418 | 78.37018589 | 21.36076246 | 0.2725<br>62355 | -<br>1.87534<br>1775 | 0.0150<br>59688 | 0.2205<br>8375  | Dow<br>n |
| LOC1019<br>05937 | 236.10<br>69603 | 135.6939785 | 336.5199422 | 2.4799<br>91713 | 1.31033<br>53        | 0.0201<br>07367 | 0.2599<br>50237 | Up       |
| LOC1019<br>06282 | 19.357<br>83682 | 33.38329208 | 5.33238157  | 0.1597<br>32047 | -<br>2.64627<br>4308 | 0.0258<br>23131 | 0.2971<br>06442 | Dow<br>n |
| LOC1019<br>06436 | 14.673<br>91522 | 26.79864258 | 2.549187864 | 0.0951<br>23768 | -<br>3.39405<br>0324 | 0.0028<br>74645 | 0.0826<br>47577 | Dow<br>n |
| LOC1019<br>06593 | 37.199<br>1664  | 17.49470759 | 56.9036252  | 3.2526<br>19394 | 1.70160<br>2015      | 0.0463<br>20487 | 0.4133<br>25452 | Up       |
| LOC1019<br>06598 | 316.54<br>52725 | 35.04783831 | 598.0427067 | 17.063<br>61178 | 4.09285<br>1143      | 2.05E-<br>06    | 0.0005<br>50176 | Up       |
| LOC1019<br>06604 | 24.738<br>26391 | 48.23993542 | 1.236592403 | 0.0256<br>34205 | -<br>5.28578<br>6023 | 0.0092<br>24256 | 0.1610<br>48345 | Dow<br>n |
| LOC1019<br>07048 | 179.72<br>00914 | 55.87477642 | 303.5654064 | 5.4329<br>59662 | 2.44173<br>8335      | 4.60E-<br>05    | 0.0049<br>82045 | Up       |
| LOC1019<br>07229 | 83.030<br>20843 | 116.1524536 | 49.90796323 | 0.4296<br>76358 | -<br>1.21867<br>7697 | 0.0277<br>70643 | 0.3094<br>98642 | Dow<br>n |
| LOC1019<br>07519 | 13.808<br>34396 | 24.06969394 | 3.546993974 | 0.1473<br>63485 | -<br>2.76254<br>9013 | 0.0127<br>06114 | 0.1999<br>81294 | Dow<br>n |
| LOC1019<br>07985 | 32.832<br>98034 | 47.92608931 | 17.73987137 | 0.3701<br>50614 | -<br>1.43381<br>5675 | 0.0282<br>80104 | 0.3122<br>16446 | Dow<br>n |
| LOC1019<br>08130 | 13.124<br>60771 | 25.73842175 | 0.510793663 | 0.0198<br>4557  | -<br>5.65503<br>9154 | 0.0061<br>66664 | 0.1274<br>65645 | Dow<br>n |
| LOC1019<br>09956 | 25.650<br>87608 | 10.1348101  | 41.16694206 | 4.0619<br>35219 | 2.02216<br>7231      | 0.0185<br>09677 | 0.2472<br>0819  | Up       |
| LOC1049<br>68414 | 250.33<br>58822 | 405.8408992 | 94.83086526 | 0.2336<br>65127 | -<br>2.09748<br>5658 | 0.0241<br>08664 | 0.2863<br>81143 | Dow<br>n |
| LOC1049<br>68444 | 153.34<br>89703 | 97.91871742 | 208.7792232 | 2.1321<br>68687 | 1.09232<br>1582      | 0.0478<br>57107 | 0.4200<br>16765 | Up       |
| LOC1049<br>68450 | 264.03<br>54071 | 87.48932943 | 440.5814847 | 5.0358<br>31084 | 2.33222<br>9892      | 4.29E-<br>05    | 0.0047<br>96668 | Up       |



|                  |                 |             |             |                 |                      |                 |                 |          |
|------------------|-----------------|-------------|-------------|-----------------|----------------------|-----------------|-----------------|----------|
| LOC1049<br>68458 | 4.6467<br>835   | 9.293567    | 0           | 0               | #NAME<br>?           | 0.0158<br>67407 | 0.2266<br>43036 | Dow<br>n |
| LOC1049<br>68478 | 3.9059<br>02565 | 0           | 7.811805129 | Inf             | Inf                  | 0.0254<br>89237 | 0.2945<br>84159 | Up       |
| LOC1049<br>68844 | 86.197<br>26043 | 169.5923264 | 2.80219447  | 0.0165<br>23121 | -<br>5.91937<br>0002 | 0.0248<br>44256 | 0.2903<br>01657 | Dow<br>n |
| LOC1049<br>68894 | 4.4089<br>91236 | 8.817982472 | 0           | 0               | #NAME<br>?           | 0.0191<br>78893 | 0.2519<br>31366 | Dow<br>n |
| LOC1049<br>68905 | 332.05<br>4341  | 147.007242  | 517.10144   | 3.5175<br>23578 | 1.81456<br>0094      | 0.0017<br>87868 | 0.0598<br>7193  | Up       |
| LOC1049<br>69591 | 112.40<br>99406 | 185.6368846 | 39.18299669 | 0.2110<br>73337 | -<br>2.24418<br>3748 | 0.0002<br>63268 | 0.0165<br>5369  | Dow<br>n |
| LOC1049<br>71896 | 9.1062<br>32531 | 15.16670385 | 3.045761215 | 0.2008<br>18928 | -<br>2.31603<br>2836 | 0.0474<br>25351 | 0.4178<br>14833 | Dow<br>n |
| LOC1049<br>71974 | 79.585<br>53172 | 131.2472026 | 27.92386081 | 0.2127<br>5776  | -<br>2.23271<br>6343 | 0.0138<br>78953 | 0.2096<br>44266 | Dow<br>n |
| LOC1049<br>72276 | 26.154<br>96073 | 0.6604058   | 51.64951566 | 78.208<br>75535 | 6.28925<br>8219      | 0.0024<br>56584 | 0.0734<br>29455 | Up       |
| LOC1049<br>72288 | 168.35<br>12787 | 306.1060642 | 30.59649313 | 0.0999<br>53894 | -<br>3.32259<br>3416 | 0.0244<br>37897 | 0.2866<br>71036 | Dow<br>n |
| LOC1049<br>72842 | 11.215<br>11769 | 22.43023538 | 0           | 0               | #NAME<br>?           | 0.0315<br>88188 | 0.3333<br>79686 | Dow<br>n |
| LOC1049<br>73704 | 40.314<br>49777 | 14.70448171 | 65.92451382 | 4.4832<br>93944 | 2.16455<br>9092      | 0.0147<br>02212 | 0.2174<br>40618 | Up       |
| LOC1049<br>74163 | 22.091<br>78129 | 7.675183104 | 36.50837948 | 4.7566<br>78634 | 2.24995<br>4559      | 0.0399<br>83023 | 0.3806<br>98819 | Up       |
| LOC1049<br>74721 | 15.623<br>8336  | 26.24895471 | 4.998712498 | 0.1904<br>34726 | -<br>2.39263<br>1515 | 0.0226<br>76831 | 0.2770<br>36314 | Dow<br>n |
| LOC1049<br>74854 | 121.43<br>94384 | 56.08897821 | 186.7898986 | 3.3302<br>42492 | 1.73562<br>7231      | 0.0034<br>00412 | 0.0904<br>00692 | Up       |
| LOC1049<br>75176 | 317.57<br>15813 | 504.0481318 | 131.0950308 | 0.2600<br>8435  | -<br>1.94294<br>8503 | 0.0211<br>583   | 0.2673<br>85601 | Dow<br>n |
| LOC1049<br>75474 | 18.245<br>94354 | 34.24792766 | 2.243959417 | 0.0655<br>21028 | -<br>3.93189<br>8204 | 0.0004<br>15096 | 0.0226<br>20227 | Dow<br>n |
| LOC1049<br>75541 | 302.75<br>24427 | 572.6088889 | 32.89599654 | 0.0574<br>49329 | -<br>4.12156         | 0.0133<br>83931 | 0.2063<br>15204 | Dow<br>n |

|                  |                 |             |             |                 |                      |                 |                 |          |
|------------------|-----------------|-------------|-------------|-----------------|----------------------|-----------------|-----------------|----------|
|                  |                 |             |             |                 | 6143                 |                 |                 |          |
| LOC1049<br>75620 | 224.57<br>04874 | 394.2930441 | 54.84793062 | 0.1391<br>04484 | -<br>2.84575<br>9165 | 0.0091<br>56092 | 0.1606<br>38043 | Dow<br>n |
| LOC1049<br>75830 | 468.40<br>20421 | 17.90466397 | 918.8994202 | 51.321<br>79091 | 5.68149<br>961       | 3.79E-<br>05    | 0.0043<br>46368 | Up       |
| LOC1049<br>75908 | 14.916<br>43789 | 29.83287579 | 0           | 0               | #NAME<br>?           | 0.0005<br>39901 | 0.0272<br>72595 | Dow<br>n |
| LOC1049<br>76349 | 27.968<br>1682  | 46.25515907 | 9.681177342 | 0.2092<br>99407 | -<br>2.25635<br>9874 | 0.0030<br>26871 | 0.0850<br>45521 | Dow<br>n |
| LOC5042<br>19    | 1526.2<br>01422 | 2060.974813 | 991.4280322 | 0.4810<br>48107 | -<br>1.05574<br>6918 | 0.0442<br>02058 | 0.4014<br>57376 | Dow<br>n |
| LOC5047<br>73    | 1076.1<br>57784 | 1962.057153 | 190.2584151 | 0.0969<br>68845 | -<br>3.36633<br>4896 | 0.0015<br>78969 | 0.0552<br>42395 | Dow<br>n |
| LOC5068<br>23    | 28.581<br>84394 | 5.898562427 | 51.26512546 | 8.6911<br>21963 | 3.119542<br>431      | 0.0155<br>29946 | 0.2246<br>78212 | Up       |
| LOC5070<br>19    | 17.683<br>10473 | 7.610317879 | 27.75589158 | 3.6471<br>39583 | 1.86676<br>5416      | 0.0437<br>04924 | 0.3988<br>43073 | Up       |
| LOC5075<br>50    | 57.173<br>2865  | 5.887262169 | 108.4593108 | 18.422<br>70782 | 4.20341<br>3223      | 0.0015<br>48889 | 0.0547<br>22342 | Up       |
| LOC5075<br>81    | 248.03<br>47124 | 369.4318872 | 126.6375375 | 0.3427<br>89948 | -<br>1.54460<br>329  | 0.0021<br>50864 | 0.0673<br>26013 | Dow<br>n |
| LOC5085<br>47    | 1323.5<br>17556 | 1952.151791 | 694.883321  | 0.3559<br>57628 | -<br>1.49022<br>2577 | 0.0272<br>76678 | 0.3069<br>56512 | Dow<br>n |
| LOC5088<br>79    | 536.54<br>61358 | 72.40303073 | 1000.689241 | 13.821<br>09603 | 3.78880<br>0123      | 0.0349<br>87736 | 0.3538<br>76846 | Up       |
| LOC5090<br>55    | 855.05<br>30568 | 1321.072538 | 389.0335752 | 0.2944<br>83129 | -<br>1.76374<br>3109 | 0.0009<br>64187 | 0.0394<br>85521 | Dow<br>n |
| LOC5095<br>13    | 62.801<br>70572 | 29.68111014 | 95.92230129 | 3.2317<br>62587 | 1.69232<br>1218      | 0.0401<br>68057 | 0.3810<br>46533 | Up       |
| LOC5101<br>85    | 25.945<br>42219 | 3.114382664 | 48.77646171 | 15.661<br>67905 | 3.96916<br>6983      | 0.0204<br>7324  | 0.2623<br>69556 | Up       |
| LOC5103<br>69    | 142.15<br>27626 | 64.16527555 | 220.1402497 | 3.4308<br>31518 | 1.77855<br>8279      | 0.0189<br>66381 | 0.2505<br>90744 | Up       |
| LOC5108<br>60    | 73.210<br>14391 | 136.2221991 | 10.19808872 | 0.0748<br>63633 | -<br>3.73959<br>1129 | 0.0215<br>7653  | 0.2692<br>75749 | Dow<br>n |
| LOC51161         | 149.72          | 75.9762161  | 223.4835839 | 2.9414          | 1.55654              | 0.0089          | 0.1581          | Up       |

|           |             |             |             |             |              |             |             |      |
|-----------|-------------|-------------|-------------|-------------|--------------|-------------|-------------|------|
| 7         | 99          |             |             | 94001       | 9094         | 88902       | 67733       |      |
| LOC512005 | 28.70479378 | 50.11481485 | 7.294772713 | 0.145561202 | -2.78030222  | 0.027425508 | 0.307979458 | Down |
| LOC512548 | 50.52876555 | 1.674773927 | 99.38275718 | 59.34099854 | 5.890957298  | 2.04E-10    | 2.82E-07    | Up   |
| LOC513329 | 525.4379969 | 43.71156798 | 1007.164426 | 23.04114157 | 4.526140291  | 3.87E-06    | 0.000863637 | Up   |
| LOC513659 | 270.7663916 | 379.1190248 | 162.4137584 | 0.428397806 | -1.222977003 | 0.01836334  | 0.246622807 | Down |
| LOC515150 | 255.2274142 | 461.0278809 | 49.42694745 | 0.107210322 | -3.221484286 | 0.006677779 | 0.132839057 | Down |
| LOC515676 | 1240.290994 | 2473.261977 | 7.320012231 | 0.002959659 | -8.400353289 | 0.002458129 | 0.073429455 | Down |
| LOC515736 | 353.4220257 | 210.8449406 | 495.9991109 | 2.352435441 | 1.234155131  | 0.039601837 | 0.379616119 | Up   |
| LOC516421 | 47.76491728 | 13.22017919 | 82.30965538 | 6.226062008 | 2.638319945  | 0.000694939 | 0.032800763 | Up   |
| LOC518080 | 35.46226058 | 18.03950826 | 52.88501289 | 2.931621645 | 1.551698921  | 0.034052489 | 0.348132981 | Up   |
| LOC520016 | 135.629819  | 80.63323806 | 190.6264    | 2.364116889 | 1.241301369  | 0.049191459 | 0.426001966 | Up   |
| LOC520638 | 3.695556897 | 0           | 7.391113793 | Inf         | Inf          | 0.031496898 | 0.333181598 | Up   |
| LOC522437 | 7.555968123 | 1.790745999 | 13.32119025 | 7.438905492 | 2.895090369  | 0.047375356 | 0.417814833 | Up   |
| LOC525353 | 563.365845  | 801.9341564 | 324.7975335 | 0.405017707 | -1.303943111 | 0.005202749 | 0.115936845 | Down |
| LOC528098 | 1041.359289 | 1921.905911 | 160.8126663 | 0.083673537 | -3.57908476  | 0.000863444 | 0.037403027 | Down |
| LOC528479 | 28.81943809 | 6.416411664 | 51.22246452 | 7.983038995 | 2.996938058  | 0.018558141 | 0.24720819  | Up   |
| LOC530173 | 7.495739042 | 0           | 14.99147808 | Inf         | Inf          | 0.002018907 | 0.064716593 | Up   |
| LOC530929 | 189.3907601 | 108.136502  | 270.6450181 | 2.50280907  | 1.323548237  | 0.031808469 | 0.334705504 | Up   |
| LOC532205 | 9.709979207 | 16.90877208 | 2.511186335 | 0.14851382  | -2.751330906 | 0.040837446 | 0.383885602 | Down |

|               |                 |             |             |                 |                      |                 |                 |      |
|---------------|-----------------|-------------|-------------|-----------------|----------------------|-----------------|-----------------|------|
| LOC5349<br>67 | 290.55<br>09368 | 11.04849039 | 570.0533832 | 51.595<br>59028 | 5.68917<br>5863      | 0.0017<br>1612  | 0.0582<br>28282 | Up   |
| LOC5352<br>80 | 1307.5<br>77068 | 2078.037229 | 537.1169067 | 0.2584<br>73188 | -<br>1.95191<br>3462 | 0.0001<br>83142 | 0.0131<br>73744 | Down |
| LOC5376<br>55 | 123.61<br>3869  | 211.648211  | 35.57952701 | 0.1681<br>06911 | -<br>2.57254<br>9057 | 0.0355<br>78179 | 0.3574<br>31505 | Down |
| LOC6136<br>77 | 41.072<br>33911 | 59.23387126 | 22.91080696 | 0.3867<br>85575 | -<br>1.37039<br>4103 | 0.0408<br>06635 | 0.3838<br>85602 | Down |
| LOC6141<br>41 | 21.477<br>23822 | 7.654248741 | 35.3002277  | 4.6118<br>47471 | 2.20534<br>4799      | 0.0396<br>8701  | 0.3798<br>25173 | Up   |
| LOC6147<br>05 | 464.51<br>49682 | 304.3439165 | 624.6860198 | 2.0525<br>66146 | 1.03742<br>8715      | 0.0421<br>23066 | 0.3908<br>66411 | Up   |
| LOC6155<br>89 | 5.1716<br>4236  | 0.353962327 | 9.989322392 | 28.221<br>42817 | 4.81871<br>9093      | 0.0300<br>71211 | 0.3240<br>08743 | Up   |
| LOC6156<br>97 | 12.508<br>39589 | 0.684165227 | 24.33262656 | 35.565<br>42424 | 5.15240<br>3468      | 0.0268<br>24026 | 0.3041<br>76114 | Up   |
| LOC6158<br>67 | 63.382<br>12857 | 125.2318762 | 1.53238099  | 0.0122<br>36349 | -<br>6.35268<br>2985 | 9.40E-<br>05    | 0.0081<br>27365 | Down |
| LOC61611<br>1 | 2661.2<br>25121 | 3887.204038 | 1435.246204 | 0.3692<br>23275 | -<br>1.43743<br>4596 | 0.0070<br>87787 | 0.1379<br>5692  | Down |
| LOC6172<br>19 | 26.700<br>65459 | 1.674773927 | 51.72653526 | 30.885<br>68219 | 4.94886<br>6291      | 0.0118<br>24534 | 0.1912<br>41559 | Up   |
| LOC6173<br>02 | 27.899<br>36975 | 10.4976436  | 45.30109589 | 4.3153<br>58533 | 2.10948<br>0428      | 0.0149<br>57112 | 0.2196<br>3364  | Up   |
| LOC6184<br>09 | 125.98<br>77258 | 68.21859475 | 183.7568569 | 2.6936<br>47643 | 1.42956<br>1144      | 0.0147<br>03208 | 0.2174<br>40618 | Up   |
| LOC6185<br>65 | 48.324<br>80225 | 19.66317534 | 76.98642916 | 3.9152<br>59251 | 1.96910<br>7839      | 0.0059<br>08472 | 0.1239<br>81381 | Up   |
| LOC6187<br>33 | 816.59<br>23509 | 527.3055371 | 1105.879165 | 2.0972<br>26536 | 1.06848<br>2705      | 0.0349<br>88213 | 0.3538<br>76846 | Up   |
| LOC7810<br>04 | 34.676<br>15616 | 55.8647746  | 13.48753772 | 0.2414<br>31883 | -<br>2.050311<br>888 | 0.0422<br>94634 | 0.3918<br>5183  | Down |
| LOC78114<br>6 | 128.48<br>89841 | 11.17333363 | 245.8046347 | 21.999<br>22088 | 4.45938<br>0526      | 0.0125<br>32656 | 0.1984<br>38578 | Up   |
| LOC7813<br>04 | 174.38<br>31247 | 321.0445106 | 27.72173879 | 0.0863<br>48584 | -<br>3.53368<br>3675 | 0.0354<br>18859 | 0.3566<br>27855 | Down |
| LOC7833       | 1123.2          | 15.66169688 | 2230.875888 | 142.44          | 7.15422              | 3.13E-          | 5.62E-          | Up   |

|               |                 |             |             |                 |                      |                 |                 |      |
|---------------|-----------------|-------------|-------------|-----------------|----------------------|-----------------|-----------------|------|
| 99            | 68792           |             |             | 15186           | 5912                 | 15              | 11              |      |
| LOC7834<br>97 | 18.428<br>29865 | 7.998576963 | 28.85802033 | 3.6078<br>94312 | 1.851157<br>078      | 0.0493<br>45401 | 0.4266<br>24205 | Up   |
| LOC7840<br>07 | 2474.7<br>29789 | 3900.464846 | 1048.994731 | 0.2689<br>40953 | -<br>1.89463<br>8639 | 0.0223<br>99276 | 0.2751<br>49845 | Down |
| LOC7858<br>03 | 17.196<br>21989 | 2.02591119  | 32.3665286  | 15.976<br>28206 | 3.99785<br>9803      | 0.0157<br>36651 | 0.2253<br>90999 | Up   |
| LOC7860<br>65 | 55.775<br>1478  | 8.674266997 | 102.8760286 | 11.859<br>91031 | 3.56802<br>1195      | 7.26E-<br>05    | 0.0068<br>3435  | Up   |
| LOC7863<br>72 | 322.49<br>0291  | 212.6791683 | 432.3014138 | 2.0326<br>45779 | 1.02335<br>8825      | 0.0444<br>55529 | 0.4025<br>39665 | Up   |
| LOC7869<br>87 | 62.870<br>64606 | 28.4538104  | 97.28748173 | 3.4191<br>37204 | 1.77363<br>2317      | 0.0079<br>06938 | 0.1458<br>36369 | Up   |
| LOC7879<br>04 | 10.992<br>04597 | 20.2034848  | 1.780607143 | 0.0881<br>33664 | -<br>3.50416<br>3004 | 0.0236<br>31714 | 0.2836<br>90992 | Down |
| LOC7884<br>14 | 184.28<br>3121  | 78.64309631 | 289.9231456 | 3.6865<br>68297 | 1.88227<br>8484      | 0.0012<br>82708 | 0.0477<br>57625 | Up   |
| LOC7898<br>29 | 182.74<br>15639 | 113.0363475 | 252.4467803 | 2.2333<br>23934 | 1.15919<br>2523      | 0.0411<br>92592 | 0.3849<br>31409 | Up   |
| LOC7908<br>86 | 31.780<br>35219 | 47.653662   | 15.90704238 | 0.3338<br>05246 | -<br>1.58292<br>1466 | 0.0257<br>42179 | 0.2965<br>54519 | Down |
| LOX           | 2107.3<br>46385 | 4011.512912 | 203.1798577 | 0.0506<br>49185 | -<br>4.30331<br>7149 | 0.0014<br>23508 | 0.0509<br>9392  | Down |
| LOXL1         | 2659.9<br>49621 | 4742.491006 | 577.4082351 | 0.1217<br>52099 | -<br>3.03798<br>1449 | 5.58E-<br>05    | 0.0057<br>63504 | Down |
| LOXL2         | 2161.1<br>06567 | 3661.937583 | 660.2755508 | 0.1803<br>07702 | -<br>2.47146<br>707  | 1.85E-<br>06    | 0.0005<br>21221 | Down |
| LOXL3         | 715.84<br>05507 | 1009.3921   | 422.2890011 | 0.4183<br>59725 | -<br>1.25718<br>4125 | 0.0136<br>55471 | 0.2082<br>83578 | Down |
| LOXL4         | 516.13<br>80435 | 938.9129821 | 93.36310499 | 0.0994<br>37442 | -<br>3.33006<br>7009 | 1.54E-<br>08    | 1.21E-<br>05    | Down |
| LPAR1         | 838.80<br>43795 | 1181.760079 | 495.8486801 | 0.4195<br>84896 | -<br>1.25296<br>5349 | 0.0240<br>47204 | 0.2861<br>95145 | Down |
| LPAR2         | 175.17<br>66776 | 69.98368852 | 280.3696666 | 4.0062<br>14484 | 2.00223<br>9662      | 0.0006<br>25191 | 0.0305<br>51127 | Up   |

|         |                 |             |             |                 |                      |                 |                 |      |
|---------|-----------------|-------------|-------------|-----------------|----------------------|-----------------|-----------------|------|
| LPAR3   | 382.50<br>41223 | 36.80352462 | 728.2047201 | 19.786<br>27666 | 4.30642<br>8249      | 0.0062<br>8949  | 0.1286<br>45163 | Up   |
| LPHN3   | 679.70<br>90816 | 1023.064125 | 336.3540377 | 0.3287<br>71217 | -<br>1.60484<br>4094 | 0.0393<br>13234 | 0.3782<br>61039 | Down |
| LRP1    | 18850.<br>28904 | 28647.4517  | 9053.126387 | 0.3160<br>18558 | -<br>1.66191<br>8811 | 0.0004<br>23755 | 0.0228<br>84055 | Down |
| LRP1B   | 10.746<br>59583 | 21.49319165 | 0           | 0               | #NAME<br>?           | 0.0321<br>66989 | 0.3361<br>17932 | Down |
| LRP8    | 287.17<br>82106 | 161.7287024 | 412.6277187 | 2.5513<br>57382 | 1.35126<br>4999      | 0.0340<br>14088 | 0.3481<br>32981 | Up   |
| LRRC15  | 59.727<br>95854 | 103.5854179 | 15.87049915 | 0.1532<br>11711 | -<br>2.70640<br>1515 | 0.0040<br>7821  | 0.1008<br>79923 | Down |
| LRRC17  | 369.84<br>44582 | 650.7127716 | 88.97614466 | 0.1367<br>36435 | -<br>2.87053<br>0377 | 0.0181<br>66404 | 0.2451<br>8736  | Down |
| LRRC2   | 219.92<br>41801 | 44.98652687 | 394.8618334 | 8.7773<br>35367 | 3.13378<br>3031      | 0.0007<br>06736 | 0.0329<br>25454 | Up   |
| LRRC23  | 16.661<br>16076 | 5.824459081 | 27.49786243 | 4.7211<br>01488 | 2.23912<br>3496      | 0.0399<br>02087 | 0.3806<br>98819 | Up   |
| LRRC25  | 140.78<br>95115 | 89.90773859 | 191.6712843 | 2.1318<br>6637  | 1.092117<br>01       | 0.0349<br>87682 | 0.3538<br>76846 | Up   |
| LRRC32  | 588.43<br>91974 | 810.1540464 | 366.7243485 | 0.4526<br>60022 | -<br>1.14350<br>0198 | 0.0165<br>97344 | 0.2328<br>15945 | Down |
| LRRC4C  | 103.08<br>02536 | 23.14152138 | 183.0189858 | 7.9086<br>84256 | 2.98343<br>7698      | 0.0243<br>01708 | 0.2863<br>81143 | Up   |
| LRRC55  | 44.039<br>97966 | 67.5521138  | 20.52784553 | 0.3038<br>81616 | -<br>1.71841<br>8695 | 0.0065<br>39387 | 0.1314<br>91244 | Down |
| LRRC6   | 37.026<br>8096  | 13.77591317 | 60.27770603 | 4.3755<br>86959 | 2.12947<br>6559      | 0.0438<br>16309 | 0.3993<br>65781 | Up   |
| LRRC75A | 312.00<br>73309 | 422.4071295 | 201.6075322 | 0.4772<br>82503 | -<br>1.06708<br>4645 | 0.0399<br>16813 | 0.3806<br>98819 | Down |
| LRRC8E  | 227.78<br>29601 | 111.4513571 | 344.114563  | 3.0875<br>76247 | 1.62647<br>4764      | 0.0449<br>23305 | 0.4049<br>40249 | Up   |
| LRRN1   | 19.743<br>26965 | 38.24516645 | 1.241372855 | 0.0324<br>58294 | -<br>4.94526<br>9018 | 0.0025<br>59701 | 0.0759<br>58912 | Down |
| LRRN4CL | 1697.7<br>89373 | 2815.067626 | 580.5111192 | 0.2062<br>15692 | -<br>2.27777         | 1.31E-<br>05    | 0.0019<br>4338  | Down |

|         |                 |             |             |                 |                      |                 |                 |      |
|---------|-----------------|-------------|-------------|-----------------|----------------------|-----------------|-----------------|------|
|         |                 |             |             |                 | 3974                 |                 |                 |      |
| LSR     | 503.80<br>60873 | 223.6092002 | 784.0029743 | 3.5061<br>3022  | 1.80987<br>958       | 0.0010<br>06189 | 0.0406<br>14294 | Up   |
| LTBP1   | 7799.8<br>44349 | 12456.12135 | 3143.567348 | 0.2523<br>71285 | -<br>1.98638<br>0327 | 0.0075<br>90062 | 0.1435<br>49614 | Down |
| LTBP2   | 3765.6<br>62271 | 5825.818246 | 1705.506295 | 0.2927<br>49657 | -<br>1.77226<br>0613 | 0.0109<br>10646 | 0.1821<br>78414 | Down |
| LTBP3   | 3552.9<br>51363 | 5156.302576 | 1949.60015  | 0.3781<br>00416 | -<br>1.40315<br>8657 | 0.0038<br>11457 | 0.0972<br>47905 | Down |
| LTC4S   | 79.293<br>23012 | 122.2797972 | 36.30666301 | 0.2969<br>14648 | -<br>1.75187<br>9824 | 0.0026<br>27459 | 0.0772<br>53661 | Down |
| LTF     | 92300.<br>80202 | 4131.043197 | 180470.5608 | 43.686<br>4376  | 5.449113<br>561      | 1.28E-<br>05    | 0.0019<br>41737 | Up   |
| LUM     | 17022.<br>82911 | 30130.27243 | 3915.385798 | 0.1299<br>48569 | -<br>2.94398<br>7344 | 4.33E-<br>05    | 0.0047<br>96668 | Down |
| LUZP2   | 76.180<br>95747 | 28.259751   | 124.1021639 | 4.3914<br>81154 | 2.13470<br>7612      | 0.0394<br>66535 | 0.3787<br>38227 | Up   |
| LYPD3   | 417.07<br>97308 | 103.8181001 | 730.3413616 | 7.0348<br>17253 | 2.81451<br>2946      | 0.0192<br>73265 | 0.2520<br>66266 | Up   |
| LYPD6B  | 24.690<br>08856 | 4.435194264 | 44.94498286 | 10.133<br>71234 | 3.34109<br>0877      | 0.0015<br>65609 | 0.0550<br>13856 | Up   |
| LYVE1   | 498.32<br>50119 | 899.1535755 | 97.49644815 | 0.1084<br>31363 | -<br>3.20514<br>5982 | 7.73E-<br>06    | 0.0013<br>95796 | Down |
| M1AP    | 49.060<br>86656 | 26.36470013 | 71.75703298 | 2.7217<br>08672 | 1.44451<br>2651      | 0.0408<br>25164 | 0.3838<br>85602 | Up   |
| MAB21L1 | 63.240<br>54307 | 105.6181132 | 20.8629729  | 0.1975<br>32149 | -<br>2.33984<br>0618 | 0.0003<br>99043 | 0.0220<br>27603 | Down |
| MAB21L2 | 188.22<br>46305 | 60.81213971 | 315.6371212 | 5.1903<br>63679 | 2.37583<br>5629      | 5.62E-<br>05    | 0.0057<br>76599 | Up   |
| MAB21L3 | 60.723<br>22211 | 2.15999256  | 119.2864517 | 55.225<br>39932 | 5.78726<br>004       | 0.0027<br>62484 | 0.0801<br>93898 | Up   |
| MACC1   | 183.03<br>52103 | 67.80033252 | 298.270088  | 4.3992<br>42259 | 2.13725<br>505       | 0.0372<br>51817 | 0.3672<br>5366  | Up   |
| MAGED1  | 3707.6<br>58731 | 5385.401405 | 2029.916056 | 0.3769<br>29388 | -<br>1.40763<br>3813 | 0.0050<br>2683  | 0.1135<br>64686 | Down |
| MAGED4  | 1232.9          | 1830.83374  | 635.0350203 | 0.3468          | -                    | 0.0025          | 0.0763          | Down |

|              |                 |             |             |                 |                      |                 |                 |          |
|--------------|-----------------|-------------|-------------|-----------------|----------------------|-----------------|-----------------|----------|
| B            | 3438            |             |             | 55646           | 1.52759<br>2725      | 78453           | 89313           | n        |
| MAGEE2       | 64.261<br>78921 | 104.8156291 | 23.70794935 | 0.2261<br>87159 | -<br>2.144411<br>068 | 0.0006<br>81988 | 0.0323<br>59364 | Dow<br>n |
| MAGEL2       | 98.084<br>16602 | 171.8831469 | 24.28518517 | 0.1412<br>88926 | -<br>2.82327<br>9704 | 7.74E-<br>06    | 0.0013<br>95796 | Dow<br>n |
| MAL2         | 836.26<br>23567 | 414.3072452 | 1258.217468 | 3.0369<br>18815 | 1.60260<br>8342      | 0.0030<br>95811 | 0.0857<br>63545 | Up       |
| MAMDC2       | 303.03<br>40164 | 516.346036  | 89.72199692 | 0.1737<br>63311 | -<br>2.52480<br>4595 | 0.0002<br>31645 | 0.0152<br>61155 | Dow<br>n |
| MAMSTR       | 91.084<br>21938 | 128.2393522 | 53.92908659 | 0.4205<br>34615 | -<br>1.24970<br>3539 | 0.0316<br>54041 | 0.3333<br>79686 | Dow<br>n |
| MAOA         | 1237.6<br>65056 | 1967.539686 | 507.7904272 | 0.2580<br>83957 | -<br>1.95408<br>7633 | 0.0001<br>19558 | 0.0095<br>98238 | Dow<br>n |
| MAOB         | 1621.1<br>45516 | 3030.24545  | 212.0455815 | 0.0699<br>76372 | -<br>3.83698<br>8331 | 0.0175<br>88823 | 0.2409<br>01564 | Dow<br>n |
| MAP1A        | 3235.3<br>55424 | 5881.13728  | 589.5735683 | 0.1002<br>48224 | -<br>3.31835<br>1415 | 0.0010<br>5905  | 0.0417<br>15746 | Dow<br>n |
| MAP1B        | 5889.3<br>82702 | 10166.08357 | 1612.681829 | 0.1586<br>3354  | -<br>2.65623<br>0258 | 0.0161<br>42704 | 0.2286<br>65812 | Dow<br>n |
| MAP1LC3<br>A | 1259.1<br>28151 | 1708.206377 | 810.0499252 | 0.4742<br>10807 | -<br>1.07639<br>9553 | 0.0224<br>0001  | 0.2751<br>49845 | Dow<br>n |
| MAP1LC3<br>C | 20.419<br>73818 | 36.1934337  | 4.646042661 | 0.1283<br>67004 | -<br>2.96165<br>3678 | 0.0079<br>17703 | 0.1458<br>853   | Dow<br>n |
| MAP3K15      | 108.65<br>01732 | 202.8705465 | 14.42979984 | 0.0711<br>28116 | -<br>3.81343<br>6232 | 0.0411<br>83705 | 0.3849<br>31409 | Dow<br>n |
| MAP3K7<br>CL | 92.218<br>66744 | 126.949872  | 57.4874629  | 0.4528<br>35927 | -<br>1.14293<br>9673 | 0.0439<br>25209 | 0.4000<br>19848 | Dow<br>n |
| MAP3K8       | 542.62<br>37226 | 298.4175277 | 786.8299175 | 2.6366<br>74606 | 1.39871<br>9538      | 0.0471<br>30249 | 0.4168<br>27454 | Up       |
| MAP3K9       | 94.532<br>61335 | 50.03616298 | 139.0290637 | 2.7785<br>71646 | 1.47434<br>3441      | 0.0216<br>09313 | 0.2692<br>75749 | Up       |



|              |                 |             |             |                 |                      |                 |                 |      |
|--------------|-----------------|-------------|-------------|-----------------|----------------------|-----------------|-----------------|------|
| MAP7         | 1003.6<br>71444 | 514.2391638 | 1493.103723 | 2.9035<br>20051 | 1.53780<br>2997      | 0.0056<br>01811 | 0.1200<br>68379 | Up   |
| MAP7D3       | 1072.2<br>06992 | 1525.375098 | 619.0388868 | 0.4058<br>27319 | -<br>1.30106<br>2108 | 0.0055<br>22457 | 0.1187<br>92269 | Down |
| MAPK8IP<br>2 | 32.599<br>94083 | 12.89562642 | 52.30425525 | 4.0559<br>68556 | 2.02004<br>6468      | 0.0103<br>44552 | 0.1755<br>22537 | Up   |
| MARCKS<br>L1 | 1435.4<br>34124 | 692.574233  | 2178.294015 | 3.1452<br>13771 | 1.65315<br>8076      | 0.0008<br>65034 | 0.0374<br>03027 | Up   |
| MARVEL<br>D1 | 3962.9<br>0647  | 6281.846858 | 1643.966082 | 0.2617<br>01076 | -<br>1.93400<br>8239 | 0.0031<br>89027 | 0.0868<br>91324 | Down |
| MATK         | 299.13<br>5619  | 168.1824625 | 430.0887754 | 2.5572<br>74813 | 1.35460<br>7206      | 0.0098<br>71552 | 0.1690<br>66781 | Up   |
| MATN4        | 54.620<br>83938 | 88.30760429 | 20.93407446 | 0.2370<br>58571 | -<br>2.07668<br>4541 | 0.0018<br>20334 | 0.0602<br>85584 | Down |
| MBNL3        | 456.42<br>79836 | 248.5813323 | 664.2746348 | 2.6722<br>62751 | 1.41806<br>1868      | 0.0128<br>5146  | 0.2006<br>98789 | Up   |
| MBOAT2       | 133.34<br>35331 | 186.0691318 | 80.61793435 | 0.4332<br>68719 | -<br>1.20666<br>6014 | 0.0383<br>08663 | 0.3721<br>14236 | Down |
| MBP          | 205.12<br>90369 | 115.6322044 | 294.6258694 | 2.5479<br>5687  | 1.34934<br>0857      | 0.0344<br>44585 | 0.3513<br>42585 | Up   |
| MCAM         | 8253.9<br>9616  | 12318.1335  | 4189.858819 | 0.3401<br>37474 | -<br>1.55581<br>0132 | 0.0010<br>25498 | 0.0409<br>12776 | Down |
| MCF2         | 73.130<br>75896 | 38.07077126 | 108.1907467 | 2.8418<br>32279 | 1.50682<br>1411      | 0.0481<br>59361 | 0.4204<br>12522 | Up   |
| MCHR1        | 32.424<br>60894 | 53.14240835 | 11.70680953 | 0.2202<br>91287 | -<br>2.18251<br>566  | 0.0075<br>56187 | 0.1435<br>49614 | Down |
| MCOLN2       | 344.91<br>15908 | 175.8192835 | 514.0038982 | 2.9234<br>78518 | 1.54768<br>599       | 0.0111<br>39988 | 0.1841<br>27202 | Up   |
| MDFI         | 462.76<br>88436 | 156.1603429 | 769.3773443 | 4.9268<br>42053 | 2.30066<br>3222      | 0.0314<br>68308 | 0.3330<br>75095 | Up   |
| ME1          | 353.91<br>23973 | 544.4222649 | 163.4025298 | 0.3001<br>39323 | -<br>1.73629<br>575  | 0.0028<br>85202 | 0.0827<br>50533 | Down |
| ME3          | 257.48<br>80525 | 399.7392169 | 115.2368881 | 0.2882<br>80167 | -<br>1.79445<br>651  | 0.0039<br>7393  | 0.0998<br>09354 | Down |
| MECR         | 390.42<br>73006 | 248.4362014 | 532.4183997 | 2.1430<br>78974 | 1.09968<br>5015      | 0.0463<br>59197 | 0.4133<br>25452 | Up   |

|               |                 |             |             |                 |                      |                 |                 |          |
|---------------|-----------------|-------------|-------------|-----------------|----------------------|-----------------|-----------------|----------|
| MEDAG         | 2064.9<br>2516  | 3710.738137 | 419.1121824 | 0.1129<br>45772 | -<br>3.14629<br>7833 | 6.43E-<br>06    | 0.0012<br>85676 | Dow<br>n |
| MEFV          | 39.910<br>49409 | 17.00855669 | 62.81243149 | 3.6929<br>90101 | 1.88478<br>9395      | 0.0423<br>66288 | 0.3923<br>13571 | Up       |
| MEGF6         | 736.95<br>39397 | 1262.501522 | 211.4063574 | 0.1674<br>50378 | -<br>2.57819<br>446  | 0.0007<br>73639 | 0.0350<br>43701 | Dow<br>n |
| MEIS2         | 235.88<br>37311 | 385.7455181 | 86.02194407 | 0.2230<br>01798 | -<br>2.16487<br>2753 | 0.0103<br>57963 | 0.1755<br>58206 | Dow<br>n |
| MEIS3         | 654.06<br>99884 | 1051.52947  | 256.6105066 | 0.2440<br>35487 | -<br>2.03483<br>7137 | 0.0035<br>95502 | 0.0939<br>79514 | Dow<br>n |
| MEP1A         | 6.2685<br>71916 | 12.53714383 | 0           | 0               | #NAME<br>?           | 0.0278<br>75627 | 0.3096<br>27791 | Dow<br>n |
| MET           | 818.28<br>37972 | 453.9913132 | 1182.576281 | 2.6048<br>43412 | 1.381196<br>649      | 0.0100<br>36692 | 0.1715<br>68276 | Up       |
| METTL9        | 3040.2<br>04481 | 1986.445277 | 4093.963685 | 2.0609<br>49643 | 1.04330<br>9255      | 0.0412<br>05192 | 0.3849<br>31409 | Up       |
| MFAP2         | 1575.1<br>86864 | 2928.184955 | 222.1887738 | 0.0758<br>79351 | -<br>3.72014<br>8851 | 0.0010<br>04548 | 0.0406<br>14294 | Dow<br>n |
| MFAP5         | 5392.2<br>57765 | 10320.36166 | 464.153865  | 0.0449<br>74574 | -<br>4.47474<br>6587 | 1.28E-<br>06    | 0.0003<br>98399 | Dow<br>n |
| MFHAS1        | 591.35<br>3916  | 878.8957787 | 303.8120532 | 0.3456<br>74721 | -<br>1.53251<br>299  | 0.0264<br>74467 | 0.3014<br>90004 | Dow<br>n |
| MGC1269<br>45 | 475.91<br>16657 | 149.6599954 | 802.163336  | 5.3599<br>04857 | 2.42220<br>7392      | 0.0242<br>79229 | 0.2863<br>81143 | Up       |
| MGC1519<br>21 | 2850.2<br>06752 | 325.872074  | 5374.54143  | 16.492<br>79536 | 4.04376<br>4036      | 1.38E-<br>12    | 4.14E-<br>09    | Up       |
| MIA           | 597.11<br>39562 | 225.6305048 | 968.5974076 | 4.2928<br>47762 | 2.10193<br>5011      | 0.0008<br>0105  | 0.0357<br>45115 | Up       |
| MICAL2        | 1196.3<br>8437  | 1710.816093 | 681.9526457 | 0.3986<br>1248  | -<br>1.32694<br>1215 | 0.0274<br>96431 | 0.3083<br>88361 | Dow<br>n |
| MISP          | 46.573<br>52014 | 22.39701119 | 70.75002909 | 3.1589<br>04932 | 1.65942<br>4519      | 0.0254<br>02511 | 0.2941<br>48968 | Up       |
| MITF          | 649.97<br>49287 | 926.3451468 | 373.6047106 | 0.4033<br>10485 | -<br>1.31003<br>7182 | 0.0170<br>10323 | 0.2362<br>13617 | Dow<br>n |
| MKI67         | 657.29          | 1001.882095 | 312.7012733 | 0.3121          | -                    | 0.0084          | 0.1523          | Dow      |

|        |                 |             |             |                 |                      |                 |                 |          |
|--------|-----------------|-------------|-------------|-----------------|----------------------|-----------------|-----------------|----------|
|        | 1684            |             |             | 13845           | 1.67985<br>5738      | 64068           | 61689           | n        |
| MKX    | 372.21<br>73417 | 535.9113825 | 208.5233008 | 0.3891<br>00339 | -<br>1.36178<br>5856 | 0.0033<br>18374 | 0.0890<br>66153 | Dow<br>n |
| MLLT11 | 240.29<br>93482 | 383.327583  | 97.27111349 | 0.2537<br>54537 | -<br>1.97849<br>4475 | 0.0003<br>64605 | 0.0206<br>18513 | Dow<br>n |
| MLPH   | 147.05<br>26832 | 87.64841135 | 206.4569551 | 2.3555<br>12803 | 1.23604<br>1174      | 0.0425<br>60664 | 0.3931<br>014   | Up       |
| MMP12  | 33.205<br>60388 | 3.185660945 | 63.22554682 | 19.846<br>91651 | 4.31084<br>2978      | 2.44E-<br>06    | 0.0006<br>00097 | Up       |
| MMP14  | 3009.8<br>54074 | 4209.316332 | 1810.391816 | 0.4300<br>91652 | -<br>1.21728<br>3965 | 0.0257<br>15522 | 0.2964<br>37329 | Dow<br>n |
| MMP15  | 652.02<br>58131 | 878.0772705 | 425.9743557 | 0.4851<br>2172  | -<br>1.04358<br>1321 | 0.0253<br>7875  | 0.2941<br>48968 | Dow<br>n |
| MMP16  | 252.28<br>38363 | 436.4316517 | 68.13602084 | 0.1561<br>20713 | -<br>2.67926<br>6134 | 0.0056<br>97997 | 0.1212<br>6282  | Dow<br>n |
| MMP2   | 18952.<br>48602 | 34662.32591 | 3242.646126 | 0.0935<br>49583 | -<br>3.41812<br>4971 | 4.52E-<br>05    | 0.0049<br>22117 | Dow<br>n |
| MMP23B | 756.75<br>14353 | 1375.497542 | 138.0053289 | 0.1003<br>31207 | -<br>3.31715<br>768  | 2.19E-<br>05    | 0.0028<br>7756  | Dow<br>n |
| MMP27  | 130.13<br>55694 | 260.0323525 | 0.238786293 | 0.0009<br>18295 | -<br>10.0887<br>5539 | 0.0092<br>56729 | 0.1613<br>73906 | Dow<br>n |
| MMP9   | 95.054<br>11398 | 4.831788244 | 185.2764397 | 38.345<br>31448 | 5.26097<br>8396      | 2.10E-<br>12    | 4.73E-<br>09    | Up       |
| MMRN1  | 800.56<br>75165 | 1367.243783 | 233.8912504 | 0.1710<br>67701 | -<br>2.54736<br>0703 | 1.83E-<br>06    | 0.0005<br>21221 | Dow<br>n |
| MN1    | 510.26<br>08556 | 951.9439709 | 68.57774025 | 0.0720<br>39681 | -<br>3.79506<br>4392 | 0.0007<br>94701 | 0.0356<br>38666 | Dow<br>n |
| MORC4  | 356.94<br>33615 | 477.2108631 | 236.67586   | 0.4959<br>56564 | -<br>1.011714<br>32  | 0.0476<br>30496 | 0.4188<br>52847 | Dow<br>n |
| MPZL2  | 223.53<br>22266 | 24.18094815 | 422.8835051 | 17.488<br>29296 | 4.12831<br>7569      | 0.0029<br>94592 | 0.0848<br>05899 | Up       |
| MPZL3  | 673.96          | 333.3043879 | 1014.633125 | 3.0441          | 1.60604              | 0.0018          | 0.0602          | Up       |

|          |                 |             |             |                 |                      |                 |                 |          |
|----------|-----------------|-------------|-------------|-----------------|----------------------|-----------------|-----------------|----------|
|          | 87566           |             |             | 63719           | 5951                 | 19551           | 85584           |          |
| MRAP2    | 30.142<br>60045 | 55.28660944 | 4.998591454 | 0.0904<br>12335 | -<br>3.46733<br>6576 | 0.0002<br>12136 | 0.0146<br>4344  | Dow<br>n |
| MRC2     | 7064.8<br>41124 | 12996.30102 | 1133.381231 | 0.0872<br>07986 | -<br>3.51939<br>5943 | 0.0002<br>5404  | 0.0161<br>99992 | Dow<br>n |
| MREG     | 41.734<br>55821 | 20.97305363 | 62.4960628  | 2.9798<br>26586 | 1.57522<br>8374      | 0.0451<br>67734 | 0.4063<br>28841 | Up       |
| MRGPRF   | 974.65<br>13896 | 1659.019229 | 290.28355   | 0.1749<br>72987 | -<br>2.51479<br>5884 | 0.0071<br>61971 | 0.1387<br>63631 | Dow<br>n |
| MRO      | 32.477<br>94147 | 55.23058635 | 9.725296581 | 0.1760<br>8534  | -<br>2.50565<br>3292 | 0.0035<br>77759 | 0.0936<br>51879 | Dow<br>n |
| MRVII    | 2983.1<br>4047  | 4931.981975 | 1034.298964 | 0.2097<br>12641 | -<br>2.25351<br>4271 | 0.0242<br>89588 | 0.2863<br>81143 | Dow<br>n |
| MS4A8    | 277.50<br>01234 | 119.6705241 | 435.3297227 | 3.6377<br>35576 | 1.86304<br>0678      | 0.0297<br>08909 | 0.3218<br>40544 | Up       |
| M-SAA3.2 | 46912.<br>92946 | 470.3037068 | 93355.55522 | 198.50<br>05729 | 7.63299<br>9361      | 0.0001<br>41415 | 0.0107<br>774   | Up       |
| MSX1     | 224.41<br>10745 | 377.3066554 | 71.51549354 | 0.1895<br>42094 | -<br>2.39940<br>9814 | 0.0094<br>59232 | 0.1638<br>78001 | Dow<br>n |
| MT1A     | 468.90<br>88907 | 27.27555536 | 910.542226  | 33.383<br>08658 | 5.06104<br>5446      | 0.0035<br>43937 | 0.0931<br>73424 | Up       |
| MT1E     | 484.98<br>49556 | 45.07088696 | 924.8990243 | 20.520<br>98565 | 4.35902<br>8122      | 0.0054<br>77989 | 0.1182<br>2222  | Up       |
| MTCL1    | 392.48<br>88157 | 569.6196675 | 215.3579639 | 0.3780<br>73259 | -<br>1.40326<br>2284 | 0.0334<br>68025 | 0.3443<br>10922 | Dow<br>n |
| MTFP1    | 312.66<br>52779 | 204.8260842 | 420.5044715 | 2.0529<br>83013 | 1.03772<br>169       | 0.0393<br>79671 | 0.3786<br>97659 | Up       |
| MTMR7    | 75.604<br>07545 | 134.9469804 | 16.26117052 | 0.1205<br>0044  | -<br>3.05288<br>968  | 0.0005<br>39188 | 0.0272<br>72595 | Dow<br>n |
| MTSS1L   | 1760.4<br>21682 | 2465.48307  | 1055.360293 | 0.4280<br>54164 | -<br>1.22413<br>4736 | 0.0405<br>04838 | 0.3827<br>63271 | Dow<br>n |
| MUC16    | 1166.1<br>76788 | 22.19204752 | 2310.161529 | 104.09<br>86203 | 6.70180<br>7138      | 0.0075<br>87811 | 0.1435<br>49614 | Up       |
| MXRA5    | 6339.3<br>84645 | 11653.66785 | 1025.101443 | 0.0879<br>63846 | -<br>3.50694         | 0.0007<br>06107 | 0.0329<br>25454 | Dow<br>n |

|        |                 |             |             |                 |                      |                 |                 |      |  |
|--------|-----------------|-------------|-------------|-----------------|----------------------|-----------------|-----------------|------|--|
|        |                 |             |             |                 | 5507                 |                 |                 |      |  |
| MXRA7  | 4352.3<br>37547 | 7339.113949 | 1365.561144 | 0.1860<br>66214 | -<br>2.426111<br>984 | 0.0041<br>39407 | 0.1015<br>53829 | Down |  |
| MXRA8  | 1763.5<br>36293 | 2915.237764 | 611.8348225 | 0.2098<br>74759 | -<br>2.25239<br>9428 | 2.01E-<br>06    | 0.0005<br>48355 | Down |  |
| MYADM  | 7266.2<br>16498 | 10095.41339 | 4437.01961  | 0.4395<br>08462 | -<br>1.18603<br>7153 | 0.0075<br>31428 | 0.1435<br>49614 | Down |  |
| MYB    | 281.68<br>25929 | 66.96033055 | 496.4048552 | 7.4134<br>17036 | 2.89013<br>8671      | 0.0276<br>78046 | 0.3092<br>30348 | Up   |  |
| MYBPH  | 497.01<br>76346 | 99.39177699 | 894.6434921 | 9.0011<br>82182 | 3.170114<br>492      | 0.0181<br>12399 | 0.2448<br>0939  | Up   |  |
| MYF5   | 21.036<br>67302 | 37.63764904 | 4.435696993 | 0.1178<br>52658 | -<br>3.08494<br>3794 | 0.0206<br>93994 | 0.2641<br>1646  | Down |  |
| MYH10  | 4769.9<br>13375 | 6597.591357 | 2942.235393 | 0.4459<br>55991 | -<br>1.16502<br>6749 | 0.0266<br>03203 | 0.3023<br>61097 | Down |  |
| MYH15  | 4.7033<br>73558 | 9.167960823 | 0.238786293 | 0.0260<br>45737 | -<br>5.26280<br>8949 | 0.0397<br>18119 | 0.3799<br>20713 | Down |  |
| MYL4   | 49.969<br>96351 | 75.12016696 | 24.81976005 | 0.3304<br>00757 | -<br>1.597711<br>102 | 0.0181<br>13493 | 0.2448<br>0939  | Down |  |
| MYL9   | 33323.<br>80572 | 58127.46803 | 8520.143411 | 0.1465<br>76889 | -<br>2.77027<br>0448 | 0.0213<br>11927 | 0.2680<br>08653 | Down |  |
| MYLK   | 16261.<br>8799  | 27285.07475 | 5238.685053 | 0.1919<br>98193 | -<br>2.38083<br>536  | 0.0347<br>55974 | 0.3531<br>16771 | Down |  |
| MYO18B | 11.587<br>06147 | 23.17412295 | 0           | 0               | #NAME<br>?           | 0.0019<br>91621 | 0.0640<br>70355 | Down |  |
| MYO3A  | 61.714<br>91378 | 22.70870881 | 100.7211188 | 4.4353<br>52076 | 2.14904<br>863       | 0.0021<br>23709 | 0.0668<br>83827 | Up   |  |
| MYO5B  | 609.10<br>26118 | 241.1884331 | 977.0167905 | 4.0508<br>44304 | 2.01822<br>2636      | 0.0002<br>56187 | 0.0162<br>28778 | Up   |  |
| MYO7A  | 36.444<br>47811 | 52.97634805 | 19.91260818 | 0.3758<br>77328 | -<br>1.411666<br>195 | 0.0391<br>82379 | 0.3776<br>08105 | Down |  |
| MYOCD  | 1332.7<br>67151 | 2445.586407 | 219.9478945 | 0.0899<br>36669 | -<br>3.47494<br>6743 | 0.0025<br>26588 | 0.0751<br>00217 | Down |  |

|              |                 |             |             |                 |                      |                 |                 |          |
|--------------|-----------------|-------------|-------------|-----------------|----------------------|-----------------|-----------------|----------|
| MYRF         | 190.77<br>35876 | 327.0533302 | 54.4938449  | 0.1666<br>2067  | -<br>2.58536<br>0713 | 3.07E-<br>06    | 0.0007<br>2688  | Dow<br>n |
| NACAD        | 267.48<br>60878 | 374.6993912 | 160.2727844 | 0.4277<br>36976 | -<br>1.22520<br>4169 | 0.0147<br>44822 | 0.2178<br>76863 | Dow<br>n |
| NAP1L3       | 22.034<br>25251 | 36.02415235 | 8.044352669 | 0.2233<br>04426 | -<br>2.16291<br>6247 | 0.0182<br>21876 | 0.2452<br>79022 | Dow<br>n |
| NARS2        | 540.07<br>56042 | 300.8592977 | 779.2919107 | 2.5902<br>20467 | 1.37307<br>4898      | 0.0489<br>48638 | 0.4248<br>27876 | Up       |
| NAV2         | 1165.6<br>555   | 1588.502076 | 742.8089239 | 0.4676<br>1596  | -<br>1.09660<br>3923 | 0.0360<br>14019 | 0.3604<br>00722 | Dow<br>n |
| NCAM1        | 502.05<br>1209  | 994.9558156 | 9.146602462 | 0.0091<br>92974 | -<br>6.76525<br>27   | 0.0021<br>36161 | 0.0671<br>5837  | Dow<br>n |
| NCS1         | 511.52<br>64869 | 843.4474496 | 179.6055242 | 0.2129<br>42163 | -<br>2.23146<br>6461 | 0.0007<br>01747 | 0.0328<br>63302 | Dow<br>n |
| NDC80        | 71.940<br>99907 | 114.4627051 | 29.41929303 | 0.2570<br>20774 | -<br>1.96004<br>3125 | 0.0150<br>68797 | 0.2205<br>8375  | Dow<br>n |
| NDN          | 254.06<br>18768 | 342.793312  | 165.3304417 | 0.4823<br>0358  | -<br>1.05198<br>6575 | 0.0314<br>3024  | 0.3329<br>77961 | Dow<br>n |
| NDNF         | 370.50<br>41332 | 237.1603645 | 503.8479019 | 2.1245<br>02984 | 1.08712<br>537       | 0.0407<br>08035 | 0.3832<br>73609 | Up       |
| NDUFA4<br>L2 | 368.92<br>42511 | 531.546354  | 206.3021481 | 0.3881<br>16947 | -<br>1.36543<br>6666 | 0.0047<br>36509 | 0.1099<br>96813 | Dow<br>n |
| NEB          | 21.609<br>08789 | 35.93284293 | 7.285332852 | 0.2027<br>48579 | -<br>2.30223<br>629  | 0.0114<br>03266 | 0.1869<br>85142 | Dow<br>n |
| NECAB2       | 107.41<br>97336 | 163.3916681 | 51.44779918 | 0.3148<br>74068 | -<br>1.66715<br>3149 | 0.0069<br>81436 | 0.1369<br>10753 | Dow<br>n |
| NECAB3       | 185.99<br>83423 | 309.3353271 | 62.66135752 | 0.2025<br>67738 | -<br>2.30352<br>3673 | 6.31E-<br>05    | 0.0062<br>34561 | Dow<br>n |
| NEDD4L       | 1604.8<br>5147  | 747.5451334 | 2462.157807 | 3.2936<br>5773  | 1.71969<br>0641      | 0.0007<br>18017 | 0.0331<br>07965 | Up       |
| NEURL1       | 202.95<br>84113 | 73.45725862 | 332.459564  | 4.5258<br>91249 | 2.17820<br>1919      | 0.0126<br>87818 | 0.1999<br>81294 | Up       |

|        |                 |             |             |                 |                      |                 |                 |          |
|--------|-----------------|-------------|-------------|-----------------|----------------------|-----------------|-----------------|----------|
| NEXN   | 2150.2<br>94577 | 3734.238749 | 566.3504048 | 0.1516<br>64219 | -<br>2.72104<br>733  | 0.0157<br>29648 | 0.2253<br>90999 | Dow<br>n |
| NFATC1 | 803.80<br>39251 | 1190.132698 | 417.4751527 | 0.3507<br>8034  | -<br>1.511360<br>202 | 0.0137<br>86387 | 0.2090<br>39288 | Dow<br>n |
| NFATC4 | 1138.2<br>63388 | 1824.94152  | 451.5852557 | 0.2474<br>51905 | -<br>2.01477<br>9946 | 4.35E-<br>05    | 0.0047<br>96668 | Dow<br>n |
| NFE2L3 | 572.33<br>18905 | 149.1892988 | 995.4744822 | 6.6725<br>59561 | 2.73824<br>0278      | 0.0344<br>84092 | 0.3515<br>46164 | Up       |
| NFKBIA | 2995.8<br>21966 | 1976.024872 | 4015.619059 | 2.0321<br>70301 | 1.02302<br>1308      | 0.0385<br>79337 | 0.3737<br>49934 | Up       |
| NHS    | 270.18<br>51557 | 390.690499  | 149.6798124 | 0.3831<br>1608  | -<br>1.38414<br>6516 | 0.0134<br>45908 | 0.2068<br>41546 | Dow<br>n |
| NHSL1  | 874.79<br>83576 | 496.8565857 | 1252.74013  | 2.5213<br>31438 | 1.33418<br>5778      | 0.0080<br>14672 | 0.1466<br>20385 | Up       |
| NHSL2  | 1595.7<br>65183 | 2537.985562 | 653.5448047 | 0.2575<br>05328 | -<br>1.95732<br>5811 | 0.0004<br>06334 | 0.0222<br>99766 | Dow<br>n |
| NID1   | 6619.8<br>243   | 10441.92067 | 2797.727929 | 0.2679<br>3231  | -<br>1.90005<br>9527 | 0.0042<br>5772  | 0.1030<br>50576 | Dow<br>n |
| NID2   | 3863.8<br>46542 | 5612.263735 | 2115.429349 | 0.3769<br>29782 | -<br>1.40763<br>2303 | 0.0043<br>93841 | 0.1052<br>12319 | Dow<br>n |
| NIPAL4 | 122.99<br>68941 | 179.4635189 | 66.53026932 | 0.3707<br>17513 | -<br>1.43160<br>7826 | 0.0437<br>84339 | 0.3992<br>76758 | Dow<br>n |
| NKAIN3 | 117.44<br>84878 | 174.9204857 | 59.97648978 | 0.3428<br>78592 | -<br>1.54423<br>0266 | 0.0047<br>79497 | 0.1107<br>16791 | Dow<br>n |
| NKX2-2 | 19.051<br>04367 | 36.84649418 | 1.255593168 | 0.0340<br>76327 | -<br>4.87508<br>637  | 0.0054<br>95003 | 0.1183<br>43285 | Dow<br>n |
| NKX3-1 | 18.946<br>13316 | 1.674773927 | 36.21749239 | 21.625<br>30225 | 4.43464<br>8392      | 0.0038<br>10383 | 0.0972<br>47905 | Up       |
| NLGN4X | 4.5187<br>97773 | 8.78458894  | 0.253006606 | 0.0288<br>01189 | -<br>5.117727<br>822 | 0.0457<br>82598 | 0.4098<br>10088 | Dow<br>n |
| NMB    | 220.46<br>49103 | 424.7651123 | 16.1647084  | 0.0380<br>5564  | -<br>4.71574<br>5889 | 2.72E-<br>13    | 1.22E-<br>09    | Dow<br>n |

|         |                 |             |             |                 |                      |                 |                 |      |
|---------|-----------------|-------------|-------------|-----------------|----------------------|-----------------|-----------------|------|
| NMI     | 1185.0<br>14059 | 775.2901393 | 1594.737979 | 2.0569<br>56355 | 1.040511<br>183      | 0.0401<br>50848 | 0.3810<br>46533 | Up   |
| NNT     | 1319.0<br>63164 | 1796.001852 | 842.1244765 | 0.4688<br>88423 | -<br>1.09268<br>3436 | 0.0373<br>52926 | 0.3676<br>61558 | Down |
| NOD2    | 823.72<br>35862 | 323.8703556 | 1323.576817 | 4.0867<br>48892 | 2.03095<br>3601      | 0.0008<br>71482 | 0.0374<br>03027 | Up   |
| NOL3    | 360.54<br>81134 | 530.0776182 | 191.0186087 | 0.3603<br>59695 | -<br>1.47249<br>0436 | 0.0166<br>6101  | 0.2335<br>02855 | Down |
| NOSTRIN | 744.83<br>26138 | 317.5879713 | 1172.077256 | 3.6905<br>59348 | 1.88383<br>949       | 0.0168<br>78425 | 0.2356<br>37319 | Up   |
| NOVA1   | 50.847<br>20429 | 80.93267825 | 20.76173032 | 0.2565<br>30869 | -<br>1.96279<br>5653 | 0.0062<br>72436 | 0.1286<br>45163 | Down |
| NOX4    | 196.55<br>20134 | 316.263649  | 76.84037773 | 0.2429<br>6304  | -<br>2.041191<br>228 | 0.0001<br>55095 | 0.0115<br>7293  | Down |
| NOXA1   | 434.37<br>01875 | 252.1226458 | 616.6177291 | 2.4457<br>0545  | 1.29025<br>0663      | 0.0221<br>0351  | 0.2733<br>75116 | Up   |
| NPAS3   | 120.26<br>37681 | 64.04438724 | 176.4831489 | 2.7556<br>38028 | 1.46238<br>6392      | 0.0238<br>95678 | 0.2849<br>57543 | Up   |
| NPAS4   | 22.537<br>2847  | 40.24342059 | 4.831148811 | 0.1200<br>48165 | -<br>3.05831<br>4739 | 0.0340<br>84901 | 0.3482<br>66352 | Down |
| NPC2    | 5541.9<br>98419 | 3408.189676 | 7675.807162 | 2.2521<br>65487 | 1.17131<br>2839      | 0.0392<br>50091 | 0.3778<br>55667 | Up   |
| NPPB    | 12.090<br>96886 | 24.18193772 | 0           | 0               | #NAME<br>?           | 0.0077<br>84157 | 0.1450<br>64825 | Down |
| NPPC    | 11.029<br>29643 | 21.81980656 | 0.238786293 | 0.0109<br>43557 | -<br>6.51377<br>4477 | 0.0109<br>32277 | 0.1823<br>70261 | Down |
| NPR2    | 1154.5<br>75751 | 1667.163565 | 641.9879378 | 0.3850<br>77956 | -<br>1.37677<br>7558 | 0.0023<br>50927 | 0.0709<br>84858 | Down |
| NPR3    | 174.32<br>34338 | 303.8306358 | 44.8162318  | 0.1475<br>03992 | -<br>2.761174<br>091 | 0.0333<br>44926 | 0.3434<br>37455 | Down |
| NPY1R   | 1238.6<br>25324 | 2316.089081 | 161.1615665 | 0.0695<br>83492 | -<br>3.845111<br>105 | 0.0019<br>80626 | 0.0639<br>45432 | Down |
| NPY5R   | 129.95<br>08142 | 242.0905344 | 17.81109397 | 0.0735<br>72038 | -<br>3.76469<br>8636 | 0.0131<br>99601 | 0.2043<br>42688 | Down |



|         |                 |             |             |                 |                      |                 |                 |      |
|---------|-----------------|-------------|-------------|-----------------|----------------------|-----------------|-----------------|------|
| NR2C2AP | 308.49<br>17969 | 204.4002783 | 412.5833154 | 2.0185<br>06623 | 1.01328<br>832       | 0.0471<br>69208 | 0.4168<br>27454 | Up   |
| NR2F1   | 443.73<br>1444  | 642.4255374 | 245.0373505 | 0.3814<br>25296 | -<br>1.39052<br>7571 | 0.0016<br>21826 | 0.0563<br>03655 | Down |
| NR4A1   | 3430.0<br>19317 | 6611.841554 | 248.1970797 | 0.0375<br>38268 | -<br>4.73549<br>4107 | 0.0175<br>89043 | 0.2409<br>01564 | Down |
| NR4A2   | 810.39<br>01864 | 1295.458268 | 325.3221049 | 0.2511<br>25114 | -<br>1.99352<br>1783 | 0.0411<br>37646 | 0.3849<br>31409 | Down |
| NRAP    | 70.114<br>53611 | 24.69145206 | 115.5376202 | 4.6792<br>55796 | 2.22627<br>9097      | 0.0027<br>1934  | 0.0793<br>86178 | Up   |
| NRG1    | 465.95<br>68704 | 78.1230156  | 853.7907253 | 10.928<br>79888 | 3.45006<br>2946      | 4.29E-<br>09    | 4.06E-<br>06    | Up   |
| NRG3    | 15.796<br>5247  | 3.064038745 | 28.52901066 | 9.3109<br>17074 | 3.21892<br>3272      | 0.0032<br>28368 | 0.0875<br>65221 | Up   |
| NRIP3   | 124.93<br>82797 | 195.4493202 | 54.42723929 | 0.2784<br>7239  | -<br>1.84439<br>3801 | 0.0414<br>06721 | 0.3862<br>50226 | Down |
| NRK     | 21.127<br>36889 | 34.89830337 | 7.356434415 | 0.2107<br>96334 | -<br>2.24607<br>8317 | 0.0142<br>10897 | 0.2127<br>84814 | Down |
| NSUN7   | 62.191<br>31227 | 27.63838886 | 96.74423567 | 3.5003<br>5728  | 1.80750<br>2185      | 0.0109<br>60214 | 0.1825<br>73604 | Up   |
| NT5DC1  | 236.22<br>79722 | 152.1477044 | 320.3082399 | 2.1052<br>45301 | 1.07398<br>8345      | 0.0414<br>56944 | 0.3862<br>50226 | Up   |
| NTF4    | 82.356<br>87607 | 31.72244586 | 132.9913063 | 4.1923<br>40869 | 2.06775<br>6024      | 0.0016<br>31364 | 0.0563<br>50885 | Up   |
| NTM     | 9.9172<br>06373 | 17.85302084 | 1.981391907 | 0.1109<br>83565 | -<br>3.17158<br>2038 | 0.0329<br>60413 | 0.3418<br>26472 | Down |
| NTN5    | 58.024<br>41628 | 3.156251389 | 112.8925812 | 35.767<br>93077 | 5.16059<br>4753      | 0.0030<br>33124 | 0.0850<br>45521 | Up   |
| NTNG2   | 292.82<br>80378 | 474.3715992 | 111.2844763 | 0.2345<br>93463 | -<br>2.09176<br>5281 | 0.0497<br>35913 | 0.4279<br>43027 | Down |
| NTRK2   | 2172.5<br>24732 | 3734.346139 | 610.7033255 | 0.1635<br>36882 | -<br>2.61231<br>2052 | 0.0498<br>19156 | 0.4284<br>54268 | Down |
| NUAK2   | 119.24<br>22407 | 76.42727827 | 162.0572032 | 2.1204<br>10498 | 1.08434<br>3589      | 0.0451<br>54597 | 0.4063<br>28841 | Up   |
| NUGGC   | 92.166<br>20729 | 21.84370628 | 162.4887083 | 7.4386<br>96812 | 2.89504<br>9897      | 1.23E-<br>05    | 0.0018<br>77797 | Up   |

|             |                 |             |             |                 |                      |                 |                 |      |
|-------------|-----------------|-------------|-------------|-----------------|----------------------|-----------------|-----------------|------|
| NUMBL       | 522.43<br>8975  | 786.0656969 | 258.8122531 | 0.3292<br>50156 | -<br>1.60274<br>3972 | 0.0046<br>50091 | 0.1088<br>83577 | Down |
| NUP35       | 506.07<br>09855 | 332.4921045 | 679.6498666 | 2.0441<br>08288 | 1.03147<br>1626      | 0.0373<br>88596 | 0.3678<br>11333 | Up   |
| NXPH4       | 29.592<br>41268 | 50.38611229 | 8.798713078 | 0.1746<br>25759 | -<br>2.51766<br>1713 | 0.0020<br>22901 | 0.0647<br>29225 | Down |
| NYAP1       | 200.70<br>61329 | 296.3083614 | 105.1039043 | 0.3547<br>11233 | -<br>1.49528<br>3076 | 0.0221<br>36936 | 0.2734<br>12444 | Down |
| OAF         | 1060.7<br>9916  | 1656.48744  | 465.1108789 | 0.2807<br>8141  | -<br>1.83248<br>0675 | 0.0004<br>48094 | 0.0238<br>40434 | Down |
| OCLN        | 1085.2<br>27031 | 551.8157042 | 1618.638358 | 2.9332<br>95202 | 1.55252<br>2269      | 0.0049<br>55215 | 0.1127<br>40832 | Up   |
| ODAM        | 10.043<br>00077 | 0.6604058   | 19.42559573 | 29.414<br>63526 | 4.87846<br>2242      | 0.0095<br>00828 | 0.1642<br>82111 | Up   |
| OGN         | 15178.<br>08579 | 29226.85899 | 1129.312588 | 0.0386<br>39547 | -<br>4.69377<br>8014 | 0.0021<br>55466 | 0.0673<br>26013 | Down |
| OLFML1      | 1313.3<br>43687 | 2179.149491 | 447.537882  | 0.2053<br>72731 | -<br>2.28368<br>346  | 0.0008<br>18669 | 0.0362<br>61386 | Down |
| OLFML2<br>B | 1488.8<br>10405 | 2731.807625 | 245.8131861 | 0.0899<br>8188  | -<br>3.47422<br>1679 | 0.0009<br>27196 | 0.0386<br>86222 | Down |
| OPN1LW      | 38.525<br>63609 | 75.80045947 | 1.250812716 | 0.0165<br>01387 | -<br>5.92126<br>8898 | 0.0411<br>99111 | 0.3849<br>31409 | Down |
| OPTC        | 36.316<br>10851 | 55.84271037 | 16.78950665 | 0.3006<br>57087 | -<br>1.73380<br>9128 | 0.0076<br>22484 | 0.1435<br>85359 | Down |
| OR4D9       | 6.8342<br>04084 | 13.17661527 | 0.491792899 | 0.0373<br>23158 | -<br>4.74378<br>5114 | 0.0331<br>34392 | 0.3430<br>0573  | Down |
| ORM1        | 119.98<br>95874 | 2.469261097 | 237.5099137 | 96.186<br>6341  | 6.58776<br>4529      | 0.0008<br>07912 | 0.0358<br>7327  | Up   |
| OSBPL3      | 460.39<br>71036 | 278.6681534 | 642.1260537 | 2.3042<br>67803 | 1.20430<br>8397      | 0.0147<br>71021 | 0.2180<br>14284 | Up   |
| OSR2        | 178.46<br>10842 | 319.2696889 | 37.65247955 | 0.1179<br>33148 | -<br>3.08395<br>8812 | 5.42E-<br>06    | 0.0011<br>59811 | Down |
| OSTN        | 87.312          | 172.7142196 | 1.910290345 | 0.0110          | -                    | 1.29E-          | 5.93E-          | Down |

|               |                 |             |             |                 |                      |                 |                 |          |
|---------------|-----------------|-------------|-------------|-----------------|----------------------|-----------------|-----------------|----------|
|               | 25496           |             |             | 60412           | 6.49845<br>1125      | 07              | 05              | n        |
| OVOL2         | 177.18<br>18225 | 67.36585379 | 286.9977912 | 4.2602<br>85814 | 2.09095<br>0221      | 0.0004<br>40704 | 0.0235<br>16878 | Up       |
| P2RX3         | 86.331<br>35799 | 49.53769321 | 123.1250228 | 2.4854<br>81556 | 1.31352<br>5397      | 0.0301<br>18931 | 0.3240<br>87515 | Up       |
| P2RY2         | 191.29<br>17799 | 40.97338121 | 341.6101786 | 8.3373<br>6852  | 3.05959<br>2105      | 3.18E-<br>07    | 0.0001<br>24148 | Up       |
| P3H1          | 1857.7<br>00811 | 2886.262887 | 829.1387348 | 0.2872<br>70691 | -<br>1.79951<br>7285 | 0.0005<br>80168 | 0.0288<br>20912 | Dow<br>n |
| P3H4          | 863.96<br>75015 | 1528.889463 | 199.0455399 | 0.1301<br>89621 | -<br>2.94131<br>3655 | 3.94E-<br>06    | 0.0008<br>63637 | Dow<br>n |
| P4HA1         | 1797.4<br>39729 | 2577.850124 | 1017.029335 | 0.3945<br>26169 | -<br>1.34180<br>7096 | 0.0081<br>09456 | 0.1477<br>5313  | Dow<br>n |
| P4HA2         | 3154.5<br>03933 | 4877.45482  | 1431.553047 | 0.2935<br>04112 | -<br>1.76854<br>7379 | 0.0004<br>23097 | 0.0228<br>84055 | Dow<br>n |
| P4HA3         | 454.97<br>6448  | 856.3219093 | 53.63098662 | 0.0626<br>29469 | -<br>3.99701<br>4539 | 0.0012<br>33364 | 0.0464<br>37889 | Dow<br>n |
| PABPC1L<br>2A | 67.671<br>28991 | 34.32409314 | 101.0184867 | 2.9430<br>78096 | 1.55732<br>5825      | 0.0182<br>38726 | 0.2453<br>15639 | Up       |
| PABPC5        | 21.464<br>43026 | 38.41250106 | 4.516359459 | 0.1175<br>75251 | -<br>3.08834<br>3681 | 0.0016<br>61825 | 0.0570<br>14889 | Dow<br>n |
| PAK6          | 304.96<br>91619 | 129.2575938 | 480.6807299 | 3.7187<br>81356 | 1.89482<br>9928      | 0.0009<br>66114 | 0.0394<br>85521 | Up       |
| PALD1         | 295.18<br>96169 | 447.2538538 | 143.1253799 | 0.3200<br>09271 | -<br>1.64381<br>4391 | 0.0006<br>52918 | 0.0313<br>10458 | Dow<br>n |
| PALLD         | 5644.7<br>86693 | 8627.312523 | 2662.260862 | 0.3085<br>85189 | -<br>1.69625<br>9277 | 0.0118<br>2577  | 0.1912<br>41559 | Dow<br>n |
| PANX2         | 46.869<br>65888 | 8.03479556  | 85.70452219 | 10.666<br>67117 | 3.41503<br>8109      | 1.62E-<br>05    | 0.0022<br>38205 | Up       |
| PAPLN         | 2391.5<br>31993 | 1337.334154 | 3445.729832 | 2.5765<br>6609  | 1.36544<br>9599      | 0.0097<br>39898 | 0.1672<br>89951 | Up       |
| PAPPA         | 201.62<br>02898 | 294.0812356 | 109.1593439 | 0.3711<br>87722 | -<br>1.42977<br>9105 | 0.0153<br>77413 | 0.2233<br>69967 | Dow<br>n |
| PAPPA2        | 414.26          | 728.9236181 | 99.60890251 | 0.1366          | -                    | 2.16E-          | 0.0005          | Dow      |

|             |                 |             |             |                 |                      |                 |                 |          |
|-------------|-----------------|-------------|-------------|-----------------|----------------------|-----------------|-----------------|----------|
|             | 62603           |             |             | 52044           | 2.87142<br>1053      | 06              | 69011           | n        |
| PAQR7       | 438.45<br>72537 | 770.6027724 | 106.3117349 | 0.1379<br>59191 | -<br>2.85768<br>6523 | 0.0079<br>67017 | 0.1464<br>93725 | Dow<br>n |
| PARD6B      | 63.409<br>25259 | 28.539214   | 98.27929117 | 3.4436<br>5795  | 1.78394<br>185       | 0.0080<br>96577 | 0.1476<br>68103 | Up       |
| PARVB       | 383.66<br>59668 | 543.0746671 | 224.2572666 | 0.4129<br>40025 | -<br>1.27599<br>5834 | 0.0077<br>84438 | 0.1450<br>64825 | Dow<br>n |
| PBK         | 109.81<br>54402 | 169.709508  | 49.92137244 | 0.2941<br>57782 | -<br>1.76533<br>7891 | 0.0119<br>24312 | 0.1923<br>18296 | Dow<br>n |
| PBX3        | 266.30<br>42512 | 437.6577145 | 94.95078789 | 0.2169<br>52163 | -<br>2.20455<br>1124 | 0.0115<br>70119 | 0.1888<br>07117 | Dow<br>n |
| PCDH11X     | 28.167<br>533   | 54.34411318 | 1.990952812 | 0.0366<br>36035 | -<br>4.77059<br>2831 | 0.0362<br>28416 | 0.3612<br>25864 | Dow<br>n |
| PCDH17      | 223.17<br>76242 | 314.7403892 | 131.6148592 | 0.4181<br>69589 | -<br>1.25783<br>9948 | 0.0208<br>26511 | 0.2648<br>11184 | Dow<br>n |
| PCDH18      | 925.04<br>6924  | 1469.825976 | 380.2678724 | 0.2587<br>16255 | -<br>1.95055<br>7392 | 0.0104<br>77779 | 0.1765<br>9035  | Dow<br>n |
| PCDH7       | 1085.4<br>74856 | 1648.662395 | 522.2873172 | 0.3167<br>94584 | -<br>1.65838<br>0425 | 0.0005<br>39884 | 0.0272<br>72595 | Dow<br>n |
| PCDH9       | 87.244<br>52682 | 154.0514315 | 20.43762215 | 0.1326<br>67525 | -<br>2.914112<br>83  | 0.0304<br>51137 | 0.3269<br>27042 | Dow<br>n |
| PCDHGC<br>3 | 1170.8<br>82235 | 1723.332755 | 618.431715  | 0.3588<br>57982 | -<br>1.47851<br>5084 | 0.0037<br>3675  | 0.0961<br>34438 | Dow<br>n |
| PCLO        | 23.106<br>2365  | 5.446737327 | 40.76573567 | 7.4844<br>32096 | 2.90389<br>2852      | 0.0022<br>54161 | 0.0690<br>18991 | Up       |
| PCOLCE      | 10884.<br>26607 | 20375.50367 | 1393.028459 | 0.0683<br>67805 | -<br>3.87053<br>9085 | 0.0053<br>36736 | 0.1171<br>80116 | Dow<br>n |
| PCOLCE2     | 1384.8<br>99382 | 2276.541568 | 493.2571953 | 0.2166<br>69532 | -<br>2.20643<br>1801 | 2.18E-<br>06    | 0.0005<br>69011 | Dow<br>n |
| PCP4L1      | 202.54<br>12215 | 366.6221649 | 38.46027801 | 0.1049<br>04399 | -<br>3.25285         | 0.0132<br>24396 | 0.2044<br>83501 | Dow<br>n |

|        |                 |             |             |                 |                      |                 |                 |          |  |
|--------|-----------------|-------------|-------------|-----------------|----------------------|-----------------|-----------------|----------|--|
|        |                 |             |             |                 | 2913                 |                 |                 |          |  |
| PCSK6  | 731.94<br>31339 | 1213.885127 | 250.0011411 | 0.2059<br>51235 | -<br>2.27962<br>5317 | 7.43E-<br>05    | 0.0068<br>9106  | Dow<br>n |  |
| PDCD1  | 202.57<br>2799  | 290.7647185 | 114.3808796 | 0.3933<br>795   | -<br>1.34600<br>6318 | 0.0212<br>80867 | 0.2678<br>05336 | Dow<br>n |  |
| PDE10A | 283.24<br>43286 | 445.2553715 | 121.2332857 | 0.2722<br>78098 | -<br>1.87684<br>7158 | 0.0007<br>17405 | 0.0331<br>07965 | Dow<br>n |  |
| PDE11A | 10.028<br>46832 | 19.05913053 | 0.99780611  | 0.0523<br>53181 | -<br>4.25557<br>8992 | 0.0067<br>04475 | 0.1329<br>28964 | Dow<br>n |  |
| PDE1A  | 341.57<br>33258 | 562.9842581 | 120.1623935 | 0.2134<br>38283 | -<br>2.22810<br>9127 | 8.50E-<br>06    | 0.0014<br>55667 | Dow<br>n |  |
| PDE3B  | 527.72<br>87602 | 269.2077964 | 786.2497239 | 2.9206<br>05326 | 1.54626<br>7414      | 0.0031<br>71638 | 0.0866<br>80179 | Up       |  |
| PDE5A  | 155.21<br>39571 | 251.6867219 | 58.74119222 | 0.2333<br>90112 | -<br>2.09918<br>4655 | 0.0349<br>31598 | 0.3538<br>76846 | Dow<br>n |  |
| PDGFD  | 595.91<br>55165 | 861.3680536 | 330.4629794 | 0.3836<br>48985 | -<br>1.38214<br>1157 | 0.0177<br>43222 | 0.2417<br>24521 | Dow<br>n |  |
| PDGFRA | 4838.5<br>49908 | 8499.707751 | 1177.392064 | 0.1385<br>21476 | -<br>2.85181<br>8429 | 0.0089<br>71821 | 0.1580<br>21806 | Dow<br>n |  |
| PDGFRB | 5420.6<br>74697 | 7648.79035  | 3192.559043 | 0.4173<br>9398  | -<br>1.26051<br>8303 | 0.0021<br>42533 | 0.0672<br>41136 | Dow<br>n |  |
| PDGFRL | 1278.1<br>36661 | 2328.518203 | 227.7551192 | 0.0978<br>11183 | -<br>3.35385<br>6774 | 0.0031<br>36643 | 0.0861<br>16427 | Dow<br>n |  |
| PDK3   | 549.23<br>80865 | 820.91644   | 277.5597331 | 0.3381<br>09605 | -<br>1.56443<br>7095 | 0.0040<br>47086 | 0.1005<br>23131 | Dow<br>n |  |
| PDLIM7 | 6404.5<br>01297 | 10345.24594 | 2463.75665  | 0.2381<br>53512 | -<br>2.07003<br>6273 | 0.0010<br>29193 | 0.0409<br>46851 | Dow<br>n |  |
| PDXK   | 4475.7<br>82257 | 2276.508876 | 6675.055639 | 2.9321<br>45669 | 1.55195<br>6778      | 0.0030<br>47455 | 0.0850<br>9686  | Up       |  |
| PDZD7  | 78.960<br>2927  | 123.3485464 | 34.57203895 | 0.2802<br>79257 | -<br>1.83506<br>3118 | 0.0333<br>04416 | 0.3434<br>13594 | Dow<br>n |  |

|         |                 |             |             |                 |                      |                 |                 |          |
|---------|-----------------|-------------|-------------|-----------------|----------------------|-----------------|-----------------|----------|
| PEAK1   | 2396.5<br>52369 | 3504.986402 | 1288.118337 | 0.3675<br>10224 | -<br>1.44414<br>371  | 0.0021<br>63957 | 0.0673<br>26013 | Dow<br>n |
| PEG10   | 194.28<br>45382 | 318.2076914 | 70.36138504 | 0.2211<br>17801 | -<br>2.177112<br>921 | 6.68E-<br>05    | 0.0065<br>10633 | Dow<br>n |
| PERP    | 1467.5<br>41657 | 368.0693454 | 2567.013968 | 6.9742<br>67215 | 2.80204<br>1641      | 1.55E-<br>05    | 0.0021<br>72137 | Up       |
| PFKP    | 2069.5<br>1979  | 2848.784108 | 1290.255473 | 0.4529<br>14445 | -<br>1.14268<br>9542 | 0.0185<br>13796 | 0.2472<br>0819  | Dow<br>n |
| PFN2    | 1213.1<br>17346 | 1698.262849 | 727.9718433 | 0.4286<br>56756 | -<br>1.22210<br>5214 | 0.0352<br>90589 | 0.3557<br>34678 | Dow<br>n |
| PHB     | 2663.4<br>51403 | 1630.397164 | 3696.505642 | 2.2672<br>42439 | 1.18093<br>8668      | 0.0131<br>66604 | 0.2041<br>53801 | Up       |
| PHLDB1  | 3455.5<br>29162 | 4914.027781 | 1997.030543 | 0.4063<br>93824 | -<br>1.29904<br>9616 | 0.0035<br>42523 | 0.0931<br>73424 | Dow<br>n |
| PHLDB2  | 3058.4<br>926   | 4534.822971 | 1582.162228 | 0.3488<br>91729 | -<br>1.51914<br>8697 | 0.0054<br>59157 | 0.1179<br>95224 | Dow<br>n |
| PHTF2   | 382.73<br>12596 | 592.8559791 | 172.6065401 | 0.2911<br>44133 | -<br>1.78019<br>4548 | 0.0042<br>08225 | 0.1024<br>4903  | Dow<br>n |
| PHYHIP  | 126.02<br>65759 | 61.65374975 | 190.399402  | 3.0882<br>04736 | 1.62676<br>8401      | 0.0401<br>23516 | 0.3810<br>46533 | Up       |
| PI16    | 20329.<br>245   | 38264.57268 | 2393.917318 | 0.0625<br>62238 | -<br>3.99856<br>4059 | 3.32E-<br>08    | 2.02E-<br>05    | Dow<br>n |
| PID1    | 563.21<br>95133 | 852.5515528 | 273.8874737 | 0.3212<br>56202 | -<br>1.63820<br>3789 | 0.0067<br>25712 | 0.1332<br>03175 | Dow<br>n |
| PIEZO2  | 598.36<br>59175 | 1075.557579 | 121.1742565 | 0.1126<br>61803 | -<br>3.14992<br>9624 | 0.0053<br>62351 | 0.1173<br>12844 | Dow<br>n |
| PIGM    | 412.88<br>14535 | 252.6688321 | 573.094075  | 2.2681<br>62916 | 1.18152<br>4269      | 0.0241<br>6822  | 0.2863<br>81143 | Up       |
| PIK3AP1 | 1180.9<br>21502 | 575.7474723 | 1786.095531 | 3.1022<br>2036  | 1.63330<br>1169      | 0.0123<br>74764 | 0.1965<br>86028 | Up       |
| PIP5K1B | 487.78<br>71013 | 288.0730335 | 687.5011691 | 2.3865<br>51635 | 1.25492<br>7551      | 0.0286<br>53642 | 0.3148<br>89897 | Up       |
| PKD1    | 6353.0<br>14799 | 9624.788949 | 3081.24065  | 0.3201<br>35918 | -<br>1.64324         | 0.0008<br>30285 | 0.0365<br>95624 | Dow<br>n |

|         |                 |             |             |                 |                      |                 |                 |          |
|---------|-----------------|-------------|-------------|-----------------|----------------------|-----------------|-----------------|----------|
|         |                 |             |             |                 | 3542                 |                 |                 |          |
| PKD2    | 1990.3<br>37423 | 2834.546092 | 1146.128754 | 0.4043<br>42959 | -<br>1.30634<br>8606 | 0.0180<br>97212 | 0.2448<br>0939  | Dow<br>n |
| PKD2L1  | 279.71<br>68387 | 59.27387623 | 500.1598012 | 8.4381<br>15289 | 3.07692<br>0799      | 0.0089<br>22182 | 0.1577<br>14947 | Up       |
| PKDCC   | 2350.6<br>19166 | 3885.495175 | 815.7431579 | 0.2099<br>4574  | -<br>2.251911<br>583 | 0.0139<br>98053 | 0.2108<br>08596 | Dow<br>n |
| PKHD1L1 | 322.90<br>5613  | 563.6478642 | 82.16336186 | 0.1457<br>70732 | -<br>2.77822<br>701  | 0.0265<br>31977 | 0.3017<br>86559 | Dow<br>n |
| PKLR    | 37.089<br>33632 | 61.24961207 | 12.92906058 | 0.2110<br>8804  | -<br>2.24408<br>3253 | 0.0075<br>17929 | 0.1435<br>49614 | Dow<br>n |
| PKNOX2  | 506.84<br>69371 | 920.5131217 | 93.18075241 | 0.1012<br>26968 | -<br>3.30433<br>4402 | 0.0253<br>70475 | 0.2941<br>48968 | Dow<br>n |
| PKP1    | 562.48<br>77589 | 253.2617467 | 871.713771  | 3.4419<br>48033 | 1.78322<br>5316      | 0.0014<br>05835 | 0.0505<br>62254 | Up       |
| PKP2    | 231.67<br>26782 | 110.1765676 | 353.1687888 | 3.2054<br>80045 | 1.68054<br>0428      | 0.0041<br>20981 | 0.1014<br>37129 | Up       |
| PKP3    | 513.61<br>10981 | 174.0335359 | 853.1886604 | 4.9024<br>38234 | 2.29349<br>9454      | 3.42E-<br>05    | 0.0039<br>97593 | Up       |
| PLA2G4F | 35.112<br>2235  | 10.302285   | 59.92216201 | 5.8163<br>95296 | 2.54012<br>5322      | 0.0018<br>75468 | 0.0611<br>18937 | Up       |
| PLA2G7  | 378.20<br>55826 | 689.4524231 | 66.95874211 | 0.0971<br>18728 | -<br>3.36410<br>6669 | 0.0401<br>74844 | 0.3810<br>46533 | Dow<br>n |
| PLA2R1  | 373.00<br>28608 | 501.0825759 | 244.9231458 | 0.4887<br>87991 | -<br>1.03271<br>9253 | 0.0305<br>21602 | 0.3269<br>73112 | Dow<br>n |
| PLAC9   | 951.68<br>84027 | 1675.483658 | 227.8931471 | 0.1360<br>16335 | -<br>2.87814<br>8168 | 6.03E-<br>06    | 0.0012<br>46663 | Dow<br>n |
| PLAU    | 1448.7<br>2868  | 2098.857838 | 798.5995227 | 0.3804<br>92432 | -<br>1.39406<br>0337 | 0.0056<br>49509 | 0.1207<br>24517 | Dow<br>n |
| PLCB4   | 1141.5<br>93539 | 1682.426933 | 600.7601447 | 0.3570<br>79486 | -<br>1.48568<br>284  | 0.0280<br>08439 | 0.3102<br>60263 | Dow<br>n |
| PLCD1   | 1077.1<br>74745 | 1575.600956 | 578.7485334 | 0.3673<br>19232 | -<br>1.44489<br>366  | 0.0018<br>03123 | 0.0601<br>66867 | Dow<br>n |

|         |                 |             |             |                 |                      |                 |                 |      |
|---------|-----------------|-------------|-------------|-----------------|----------------------|-----------------|-----------------|------|
| PLCD4   | 182.82<br>28454 | 271.0473306 | 94.59836014 | 0.3490<br>10484 | -<br>1.51865<br>7719 | 0.0082<br>16046 | 0.1490<br>90978 | Down |
| PLCE1   | 342.08<br>75803 | 543.6269616 | 140.548199  | 0.2585<br>37948 | -<br>1.95155<br>2043 | 0.0002<br>81922 | 0.0170<br>70046 | Down |
| PLCH2   | 398.92<br>25792 | 198.2620029 | 599.5831554 | 3.0241<br>95996 | 1.59655<br>1643      | 0.0157<br>15714 | 0.2253<br>90999 | Up   |
| PLCL1   | 229.73<br>78792 | 322.2609277 | 137.2148308 | 0.4257<br>87984 | -<br>1.23179<br>2857 | 0.0243<br>26334 | 0.2864<br>44051 | Down |
| PLCXD1  | 366.22<br>71265 | 29.67034617 | 702.7839068 | 23.686<br>40739 | 4.56598<br>7491      | 0.0053<br>3576  | 0.1171<br>80116 | Up   |
| PLCXD3  | 8.0619<br>07378 | 14.33842716 | 1.785387596 | 0.1245<br>17674 | -<br>3.00557<br>7565 | 0.0278<br>45011 | 0.3096<br>27791 | Down |
| PLD1    | 1151.4<br>69706 | 1794.120227 | 508.8191858 | 0.2836<br>03729 | -<br>1.81805<br>1595 | 0.0169<br>41297 | 0.2358<br>01348 | Down |
| PLEK2   | 86.307<br>09612 | 32.46658912 | 140.1476031 | 4.3166<br>71598 | 2.10991<br>934       | 0.0352<br>80855 | 0.3557<br>34678 | Up   |
| PLEKHA2 | 309.85<br>34144 | 443.3843938 | 176.322435  | 0.3976<br>73977 | -<br>1.33034<br>1938 | 0.0183<br>16451 | 0.2461<br>76939 | Down |
| PLEKHD1 | 93.165<br>32206 | 39.87550228 | 146.4551418 | 3.6728<br>09957 | 1.87688<br>4248      | 0.0395<br>58542 | 0.3794<br>03337 | Up   |
| PLEKHG2 | 1311.6<br>31117 | 1960.691835 | 662.5704001 | 0.3379<br>26842 | -<br>1.56521<br>7144 | 0.0022<br>85725 | 0.0694<br>77455 | Down |
| PLEKHG4 | 43.346<br>05581 | 73.40069925 | 13.29141236 | 0.1810<br>80187 | -<br>2.46529<br>9391 | 0.0020<br>35443 | 0.0648<br>99595 | Down |
| PLEKHN1 | 386.19<br>73717 | 125.0327327 | 647.3620107 | 5.1775<br>40285 | 2.37226<br>6874      | 3.82E-<br>05    | 0.0043<br>46368 | Up   |
| PLEKHS1 | 412.77<br>27534 | 82.5749336  | 742.9705732 | 8.9975<br>31585 | 3.16952<br>9262      | 0.0263<br>13258 | 0.3006<br>29808 | Up   |
| PLIN3   | 1436.2<br>41354 | 880.4934452 | 1991.989262 | 2.2623<br>55584 | 1.17782<br>5701      | 0.0289<br>10096 | 0.3164<br>27425 | Up   |
| PLLP    | 196.12<br>87175 | 59.42733707 | 332.8300979 | 5.6006<br>22782 | 2.48558<br>7262      | 4.22E-<br>05    | 0.0047<br>70727 | Up   |
| PLN     | 1096.0<br>56223 | 1900.341403 | 291.7710435 | 0.1535<br>36119 | -<br>2.70335<br>001  | 0.0429<br>65108 | 0.3944<br>34583 | Down |
| PLOD1   | 3118.7          | 4884.171895 | 1353.395539 | 0.2770          | -                    | 0.0005          | 0.0266          | Down |



|        |                 |             |             |                 |                      |                 |                 |          |
|--------|-----------------|-------------|-------------|-----------------|----------------------|-----------------|-----------------|----------|
|        | 83717           |             |             | 98261           | 1.85153<br>0437      | 14584           | 67907           | n        |
| PLOD2  | 2358.4<br>78855 | 4096.652812 | 620.3048984 | 0.1514<br>17493 | -<br>2.72339<br>6208 | 9.20E-<br>05    | 0.0080<br>72305 | Dow<br>n |
| PLOD3  | 1723.4<br>0583  | 2326.860677 | 1119.950984 | 0.4813<br>14157 | -<br>1.05494<br>9237 | 0.0207<br>59619 | 0.2645<br>78473 | Dow<br>n |
| PLSCR4 | 1378.6<br>78024 | 2241.484272 | 515.8717768 | 0.2301<br>474   | -<br>2.119369<br>952 | 0.0354<br>9885  | 0.3570<br>33454 | Dow<br>n |
| PLXDC1 | 311.52<br>87302 | 451.7791944 | 171.278266  | 0.3791<br>1942  | -<br>1.39927<br>5737 | 0.0093<br>13492 | 0.1618<br>208   | Dow<br>n |
| PLXDC2 | 1959.3<br>70101 | 3217.620728 | 701.1194749 | 0.2178<br>99975 | -<br>2.19826<br>2066 | 9.41E-<br>06    | 0.0015<br>8056  | Dow<br>n |
| PLXNA3 | 358.49<br>82967 | 522.3243568 | 194.6722367 | 0.3727<br>03731 | -<br>1.42389<br>8833 | 0.0121<br>31121 | 0.1940<br>87136 | Dow<br>n |
| PLXNA4 | 666.19<br>98121 | 1155.283211 | 177.1164134 | 0.1533<br>09952 | -<br>2.70547<br>6745 | 0.0058<br>00878 | 0.1230<br>15557 | Dow<br>n |
| PMEPA1 | 3357.4<br>73522 | 5235.519205 | 1479.427839 | 0.2825<br>75191 | -<br>1.82329<br>3287 | 0.0013<br>09128 | 0.0484<br>40436 | Dow<br>n |
| PMP22  | 2917.6<br>97837 | 4790.046177 | 1045.349497 | 0.2182<br>33699 | -<br>2.19605<br>4197 | 0.0003<br>16368 | 0.0186<br>91351 | Dow<br>n |
| PNCK   | 198.88<br>46519 | 360.2487768 | 37.52052695 | 0.1041<br>51712 | -<br>3.26324<br>1537 | 0.0295<br>93197 | 0.3214<br>2987  | Dow<br>n |
| PNMAL1 | 59.975<br>93319 | 87.90098022 | 32.05088616 | 0.3646<br>249   | -<br>1.45551<br>5008 | 0.0372<br>78453 | 0.3672<br>5366  | Dow<br>n |
| PNMT   | 529.37<br>86567 | 5.615878381 | 1053.141435 | 187.52<br>92454 | 7.55097<br>1793      | 0.0001<br>59408 | 0.0117<br>48522 | Up       |
| PODN   | 2933.6<br>43346 | 4592.058897 | 1275.227795 | 0.2777<br>02839 | -<br>1.84838<br>6166 | 0.0088<br>23418 | 0.1569<br>203   | Dow<br>n |
| PODXL2 | 72.643<br>01615 | 110.5699688 | 34.71606351 | 0.3139<br>73712 | -<br>1.67128<br>4324 | 0.0025<br>07084 | 0.0746<br>43849 | Dow<br>n |
| POLM   | 127.51          | 179.7664034 | 75.26922653 | 0.4187          | -                    | 0.0448          | 0.4046          | Dow      |

|              |                 |             |             |                 |                      |                 |                 |          |
|--------------|-----------------|-------------|-------------|-----------------|----------------------|-----------------|-----------------|----------|
|              | 7815            |             |             | 05749           | 1.25599<br>1369      | 41816           | 11327           | n        |
| POPDC2       | 20.221<br>77501 | 37.66513676 | 2.778413253 | 0.0737<br>6618  | -<br>3.76089<br>6665 | 0.0004<br>57433 | 0.0241<br>68758 | Dow<br>n |
| POR          | 3400.5<br>44364 | 2094.876756 | 4706.211972 | 2.2465<br>34055 | 1.16770<br>0931      | 0.0156<br>88828 | 0.2253<br>90999 | Up       |
| PPAPDC2      | 100.76<br>30299 | 60.98393649 | 140.5421232 | 2.3045<br>76112 | 1.20450<br>1415      | 0.0406<br>6701  | 0.3832<br>503   | Up       |
| PPAPDC3      | 147.95<br>68245 | 219.6139639 | 76.29968514 | 0.3474<br>26383 | -<br>1.52522<br>0781 | 0.0347<br>85577 | 0.3532<br>1797  | Dow<br>n |
| PPEF1        | 22.883<br>28437 | 37.47864934 | 8.287919414 | 0.2211<br>37089 | -<br>2.17698<br>7081 | 0.0152<br>30603 | 0.2219<br>54564 | Dow<br>n |
| PPFIA4       | 643.76<br>66129 | 1020.894868 | 266.6383576 | 0.2611<br>81015 | -<br>1.93687<br>8064 | 0.0127<br>23665 | 0.1999<br>81294 | Dow<br>n |
| PPIC         | 1605.9<br>25647 | 2517.257354 | 694.5939404 | 0.2759<br>32828 | -<br>1.85761<br>0989 | 0.0006<br>66265 | 0.0316<br>96922 | Dow<br>n |
| PPIP5K1      | 518.47<br>0896  | 330.4985972 | 706.4431947 | 2.1375<br>07392 | 1.09592<br>9409      | 0.0345<br>62493 | 0.3517<br>47208 | Up       |
| PPM1E        | 33.133<br>99598 | 60.56248148 | 5.705510473 | 0.0942<br>08664 | -<br>3.40799<br>6444 | 0.0088<br>30029 | 0.1569<br>203   | Dow<br>n |
| PPP1R14<br>D | 196.89<br>25232 | 65.05968763 | 328.7253588 | 5.0526<br>73487 | 2.33704<br>6953      | 9.75E-<br>05    | 0.0083<br>90882 | Up       |
| PPP1R1A      | 56.691<br>68676 | 90.88345491 | 22.49991862 | 0.2475<br>68918 | -<br>2.01409<br>7896 | 0.0293<br>02866 | 0.3195<br>59389 | Dow<br>n |
| PPP1R2       | 628.26<br>33303 | 868.7176902 | 387.8089703 | 0.4464<br>15417 | -<br>1.16354<br>1242 | 0.0261<br>28605 | 0.2994<br>71455 | Dow<br>n |
| PPP1R3G      | 99.217<br>81577 | 157.7158366 | 40.719795   | 0.2581<br>84567 | -<br>1.95352<br>5328 | 0.0020<br>43843 | 0.0650<br>52096 | Dow<br>n |
| PPP1R42      | 26.163<br>16175 | 42.04267082 | 10.28365268 | 0.2446<br>00366 | -<br>2.03150<br>1531 | 0.0137<br>7689  | 0.2090<br>39288 | Dow<br>n |
| PPP2R2C      | 375.27<br>05469 | 740.5925685 | 9.948525304 | 0.0134<br>33196 | -<br>6.21805<br>3575 | 0.0002<br>46335 | 0.0158<br>87118 | Dow<br>n |
| PRAF2        | 841.77          | 1193.632865 | 489.9181981 | 0.4104          | -                    | 0.0075          | 0.1435          | Dow      |

|              |                 |             |             |                 |                      |                 |                 |          |
|--------------|-----------------|-------------|-------------|-----------------|----------------------|-----------------|-----------------|----------|
|              | 55317           |             |             | 42953           | 1.28474<br>6378      | 99357           | 49614           | n        |
| PRC1         | 344.85<br>03838 | 540.4831337 | 149.217634  | 0.2760<br>81943 | -<br>1.85683<br>156  | 0.0012<br>4613  | 0.0467<br>83193 | Dow<br>n |
| PRCP         | 594.01<br>91041 | 799.7905199 | 388.2476883 | 0.4854<br>36722 | -<br>1.04264<br>4846 | 0.0400<br>11164 | 0.3806<br>98819 | Dow<br>n |
| PRDM6        | 68.713<br>05026 | 114.3727273 | 23.05337322 | 0.2015<br>63552 | -<br>2.31069<br>3307 | 0.0112<br>56681 | 0.1855<br>44363 | Dow<br>n |
| PRDM8        | 213.99<br>22894 | 375.9114972 | 52.07308161 | 0.1385<br>24844 | -<br>2.85178<br>335  | 0.0001<br>1305  | 0.0092<br>40822 | Dow<br>n |
| PRELP        | 5875.1<br>46113 | 9697.332501 | 2052.959724 | 0.2117<br>03551 | -<br>2.23988<br>2627 | 0.0019<br>33632 | 0.0625<br>66177 | Dow<br>n |
| PRF1         | 143.30<br>82025 | 79.00672101 | 207.6096839 | 2.6277<br>47124 | 1.39382<br>6448      | 0.0135<br>84486 | 0.2079<br>06218 | Up       |
| PRG4         | 4952.7<br>53337 | 9820.839823 | 84.6668507  | 0.0086<br>21142 | -<br>6.85790<br>5364 | 3.37E-<br>08    | 2.02E-<br>05    | Dow<br>n |
| PRICKLE<br>1 | 694.52<br>1743  | 1021.614082 | 367.4294036 | 0.3596<br>55774 | -<br>1.475311<br>329 | 0.0035<br>2708  | 0.0931<br>38742 | Dow<br>n |
| PRICKLE<br>2 | 564.97<br>18769 | 941.1763174 | 188.7674364 | 0.2005<br>65434 | -<br>2.31785<br>5107 | 0.0019<br>11256 | 0.0621<br>52119 | Dow<br>n |
| PRKCB        | 320.37<br>47366 | 487.9284906 | 152.8209826 | 0.3132<br>03647 | -<br>1.67482<br>7085 | 0.0490<br>3522  | 0.4251<br>68933 | Dow<br>n |
| PRKCDB<br>P  | 3882.2<br>91578 | 5694.537475 | 2070.045682 | 0.3635<br>14278 | -<br>1.45991<br>6062 | 0.0034<br>10162 | 0.0904<br>00692 | Dow<br>n |
| PRKG1        | 727.70<br>53826 | 1078.075255 | 377.3355101 | 0.3500<br>08507 | -<br>1.51453<br>8109 | 0.0464<br>95421 | 0.4141<br>29347 | Dow<br>n |
| PRKRA        | 278.95<br>7272  | 442.5162524 | 115.3982917 | 0.2607<br>77522 | -<br>1.93910<br>8576 | 0.0018<br>33584 | 0.0605<br>27213 | Dow<br>n |
| PRND         | 192.62<br>36182 | 293.0880293 | 92.15920707 | 0.3144<br>42072 | -<br>1.66913<br>3835 | 0.0072<br>18402 | 0.1391<br>30255 | Dow<br>n |
| PROCR        | 744.35          | 1310.557458 | 178.1561537 | 0.1359          | -                    | 2.41E-          | 0.0001          | Dow      |

|              |                 |             |             |                 |                      |                 |                 |      |
|--------------|-----------------|-------------|-------------|-----------------|----------------------|-----------------|-----------------|------|
|              | 68057           |             |             | 39216           | 2.87896<br>6384      | 07              | 03346           | n    |
| PROKR2       | 128.19<br>92815 | 27.41166982 | 228.9868933 | 8.3536<br>28025 | 3.06240<br>2904      | 0.0238<br>13157 | 0.2848<br>68462 | Up   |
| PROM2        | 267.17<br>62901 | 101.7975841 | 432.5549961 | 4.2491<br>67599 | 2.08718<br>0249      | 0.0004<br>95547 | 0.0257<br>55567 | Up   |
| PROS1        | 2682.9<br>72196 | 4186.167391 | 1179.777    | 0.2818<br>27478 | -<br>1.827115<br>812 | 0.0032<br>06465 | 0.0871<br>02502 | Down |
| PROX1        | 653.70<br>71139 | 935.0549857 | 372.359242  | 0.3982<br>2176  | -<br>1.32835<br>6039 | 0.0030<br>01188 | 0.0848<br>59065 | Down |
| PRR15L       | 214.65<br>45157 | 117.8112924 | 311.4977389 | 2.6440<br>39739 | 1.40274<br>386       | 0.0446<br>06538 | 0.4037<br>03762 | Up   |
| PRRG2        | 195.13<br>12334 | 97.89854598 | 292.3639209 | 2.9863<br>96968 | 1.57840<br>5949      | 0.0229<br>91531 | 0.2791<br>74007 | Up   |
| PRRG4        | 72.196<br>47983 | 24.6275191  | 119.7654406 | 4.8630<br>73705 | 2.28186<br>8457      | 0.0007<br>6553  | 0.0347<br>63937 | Up   |
| PRRX1        | 874.45<br>51336 | 1550.274926 | 198.6353416 | 0.1281<br>29107 | -<br>2.96432<br>9847 | 0.0005<br>19414 | 0.0267<br>63964 | Down |
| PRRX2        | 1052.5<br>39591 | 1741.375519 | 363.7036633 | 0.2088<br>59984 | -<br>2.25939<br>1985 | 0.0001<br>11774 | 0.0091<br>94511 | Down |
| PRSS22       | 344.59<br>04591 | 12.76154505 | 676.4193731 | 53.004<br>50459 | 5.72804<br>3067      | 0.0008<br>71366 | 0.0374<br>03027 | Up   |
| PRSS48       | 18.216<br>78622 | 36.43357244 | 0           | 0               | #NAME<br>?           | 0.0082<br>55048 | 0.1494<br>97012 | Down |
| PRX          | 113.41<br>24458 | 65.71311506 | 161.1117766 | 2.4517<br>44625 | 1.29380<br>8715      | 0.0389<br>20256 | 0.3764<br>94332 | Up   |
| PSAT1        | 1372.7<br>20373 | 642.9408253 | 2102.49992  | 3.2701<br>29749 | 1.70934<br>7879      | 0.0206<br>73014 | 0.2640<br>36091 | Up   |
| PSD4         | 621.19<br>98157 | 362.0813731 | 880.3182583 | 2.4312<br>71874 | 1.281711<br>23       | 0.0091<br>88346 | 0.1607<br>96121 | Up   |
| PSORS1C<br>2 | 16.375<br>51992 | 0           | 32.75103984 | Inf             | Inf                  | 0.0013<br>8376  | 0.0498<br>68051 | Up   |
| PTGDS        | 6364.9<br>70822 | 3491.77401  | 9238.167633 | 2.6456<br>94598 | 1.40364<br>6536      | 0.0159<br>34686 | 0.2274<br>23378 | Up   |
| PTGER3       | 220.31<br>57612 | 360.755592  | 79.8759304  | 0.2214<br>12868 | -<br>2.17518<br>9022 | 0.0117<br>08241 | 0.1905<br>32428 | Down |
| PTGFRN       | 4603.7<br>3146  | 7655.452251 | 1552.010669 | 0.2027<br>32721 | -<br>2.30234<br>9133 | 0.0232<br>23427 | 0.2808<br>55371 | Down |

|        |                 |             |             |                 |                      |                 |                 |          |
|--------|-----------------|-------------|-------------|-----------------|----------------------|-----------------|-----------------|----------|
| PTGIR  | 126.18<br>29074 | 206.270493  | 46.09532168 | 0.2234<br>70265 | -<br>2.16184<br>5218 | 0.0001<br>91624 | 0.0135<br>83244 | Dow<br>n |
| PTGIS  | 1763.9<br>18944 | 3211.565481 | 316.2724076 | 0.0984<br>79203 | -<br>3.34403<br>711  | 0.0012<br>08022 | 0.0457<br>34431 | Dow<br>n |
| PTH1R  | 168.19<br>31044 | 248.7153257 | 87.67088312 | 0.3524<br>94897 | -<br>1.50432<br>5723 | 0.0037<br>25897 | 0.0961<br>00187 | Dow<br>n |
| PTN    | 1893.1<br>63491 | 3267.777634 | 518.5493472 | 0.1586<br>85628 | -<br>2.65575<br>6621 | 0.0117<br>54064 | 0.1907<br>70149 | Dow<br>n |
| PTPDC1 | 146.64<br>42808 | 213.7178596 | 79.57070196 | 0.3723<br>16577 | -<br>1.42539<br>8243 | 0.0380<br>61413 | 0.3709<br>80161 | Dow<br>n |
| PTPLA  | 227.99<br>80132 | 366.6828486 | 89.31317787 | 0.2435<br>70645 | -<br>2.03758<br>7825 | 0.0184<br>11687 | 0.2470<br>11151 | Dow<br>n |
| PTPN22 | 53.831<br>96071 | 23.53658951 | 84.12733191 | 3.5743<br>21245 | 1.83766<br>9304      | 0.0486<br>82512 | 0.4237<br>45214 | Up       |
| PTPRK  | 1588.1<br>57925 | 988.971668  | 2187.344183 | 2.2117<br>35941 | 1.14517<br>9153      | 0.0316<br>14143 | 0.3333<br>79686 | Up       |
| PTPRQ  | 137.64<br>22669 | 270.7111721 | 4.573361753 | 0.0168<br>93879 | -<br>5.88735<br>5577 | 0.0020<br>67396 | 0.0654<br>67676 | Dow<br>n |
| PTPRS  | 2339.8<br>97791 | 3850.457853 | 829.3377294 | 0.2153<br>86783 | -<br>2.21499<br>8373 | 1.32E-<br>05    | 0.0019<br>4338  | Dow<br>n |
| PTPRZ1 | 156.86<br>2045  | 81.54607321 | 232.1780167 | 2.8472<br>00455 | 1.50954<br>4068      | 0.0270<br>97592 | 0.3058<br>98299 | Up       |
| PTTG1  | 60.792<br>58804 | 90.91199028 | 30.67318581 | 0.3373<br>94283 | -<br>1.56749<br>2566 | 0.0480<br>88991 | 0.4204<br>12522 | Dow<br>n |
| PVRIG  | 109.16<br>34704 | 58.05796309 | 160.2689776 | 2.7604<br>99492 | 1.46492<br>9336      | 0.0117<br>18226 | 0.1905<br>32428 | Up       |
| PVRL3  | 165.78<br>3761  | 267.7672505 | 63.80027158 | 0.2382<br>67643 | -<br>2.06934<br>5051 | 0.0008<br>70815 | 0.0374<br>03027 | Dow<br>n |
| PXDN   | 5101.0<br>37241 | 6832.754671 | 3369.319812 | 0.4931<br>1295  | -<br>1.02000<br>9954 | 0.0153<br>16708 | 0.2229<br>84649 | Dow<br>n |
| PYGM   | 279.35<br>9587  | 545.0180895 | 13.70108449 | 0.0251<br>3877  | -<br>5.31394<br>2117 | 0.0448<br>41488 | 0.4046<br>11327 | Dow<br>n |

|               |                 |             |             |                 |                      |                 |                 |      |
|---------------|-----------------|-------------|-------------|-----------------|----------------------|-----------------|-----------------|------|
| QPCT          | 636.64<br>08395 | 1151.880993 | 121.4006863 | 0.1053<br>93428 | -<br>3.24614<br>3189 | 0.0361<br>97628 | 0.3612<br>25864 | Down |
| RAB11FIP<br>4 | 97.278<br>1678  | 37.46353444 | 157.0928012 | 4.1932<br>18913 | 2.06805<br>815       | 0.0008<br>8233  | 0.0375<br>99374 | Up   |
| RAB15         | 713.14<br>73713 | 285.0711462 | 1141.223597 | 4.0032<br>93956 | 2.001187<br>555      | 0.0001<br>88041 | 0.0134<br>18824 | Up   |
| RAB17         | 92.356<br>47406 | 21.51274045 | 163.2002077 | 7.5862<br>11901 | 2.92337<br>967       | 0.0109<br>68514 | 0.1825<br>73604 | Up   |
| RAB20         | 185.28<br>34691 | 74.74891635 | 295.8180219 | 3.9574<br>89103 | 1.98458<br>5378      | 0.0027<br>94055 | 0.0805<br>21626 | Up   |
| RAB23         | 229.11<br>19748 | 328.9670549 | 129.2568948 | 0.3929<br>17445 | -<br>1.34770<br>1871 | 0.0177<br>23261 | 0.2416<br>35642 | Down |
| RAB30         | 595.10<br>99198 | 852.6560712 | 337.5637684 | 0.3958<br>96751 | -<br>1.33680<br>3867 | 0.0060<br>13212 | 0.1255<br>93029 | Down |
| RAB3C         | 114.60<br>74967 | 182.8145644 | 46.40042908 | 0.2538<br>11447 | -<br>1.97817<br>0959 | 0.0007<br>00309 | 0.0328<br>63302 | Down |
| RAB3IL1       | 502.38<br>88104 | 785.5190242 | 219.2585965 | 0.2791<br>25762 | -<br>1.84101<br>2808 | 0.0001<br>85992 | 0.0133<br>25487 | Down |
| RAB3IP        | 2098.6<br>77299 | 1023.471926 | 3173.882671 | 3.1010<br>94022 | 1.63277<br>7268      | 0.0030<br>24054 | 0.0850<br>45521 | Up   |
| RAB6B         | 28.672<br>91872 | 52.30924447 | 5.036592983 | 0.0962<br>8495  | -<br>3.37654<br>5879 | 0.0002<br>19394 | 0.0148<br>88165 | Down |
| RADIL         | 80.603<br>46504 | 114.5216106 | 46.68531951 | 0.4076<br>55108 | -<br>1.29457<br>9003 | 0.0166<br>85268 | 0.2335<br>02855 | Down |
| RAI2          | 293.96<br>70897 | 523.9865611 | 63.94761829 | 0.1220<br>40569 | -<br>3.03456<br>7278 | 2.77E-<br>08    | 1.99E-<br>05    | Down |
| RANBP3L       | 7.9219<br>85273 | 1.392089882 | 14.45188066 | 10.381<br>42785 | 3.37593<br>2979      | 0.0286<br>38481 | 0.3148<br>89897 | Up   |
| RAP1GAP       | 267.02<br>60502 | 85.35289792 | 448.6992025 | 5.2569<br>88497 | 2.39423<br>6578      | 2.86E-<br>05    | 0.0034<br>97108 | Up   |
| RAP1GAP<br>2  | 151.28<br>51654 | 92.64875042 | 209.9215804 | 2.2657<br>78864 | 1.18000<br>7063      | 0.0320<br>84694 | 0.3356<br>48076 | Up   |
| RAPGEFL<br>1  | 369.96<br>89786 | 216.0387711 | 523.899186  | 2.4250<br>23912 | 1.27799<br>8973      | 0.0351<br>50287 | 0.3551<br>16633 | Up   |
| RARRES1       | 8697.7<br>31607 | 16776.32514 | 619.1380703 | 0.0369<br>05464 | -<br>4.76002         | 0.0303<br>74431 | 0.3262<br>98326 | Down |

|              |                 |             |             |                 |                      |                 |                 |          |  |
|--------------|-----------------|-------------|-------------|-----------------|----------------------|-----------------|-----------------|----------|--|
|              |                 |             |             |                 | 1745                 |                 |                 |          |  |
| RASA4B       | 650.32<br>3756  | 946.5475168 | 354.0999951 | 0.3740<br>96375 | -<br>1.41851<br>8108 | 0.0128<br>13928 | 0.2005<br>50792 | Dow<br>n |  |
| RASGEF1<br>C | 24.139<br>29071 | 8.986360599 | 39.29222082 | 4.3724<br>28681 | 2.12843<br>4852      | 0.0284<br>76194 | 0.3141<br>64043 | Up       |  |
| RASGRF1      | 7.7785<br>02628 | 14.30619254 | 1.250812716 | 0.0874<br>31559 | -<br>3.51570<br>2068 | 0.0401<br>06564 | 0.3810<br>46533 | Dow<br>n |  |
| RASGRP2      | 283.11<br>38349 | 430.6771725 | 135.5504972 | 0.3147<br>38059 | -<br>1.66777<br>6452 | 0.0010<br>0875  | 0.0406<br>14294 | Dow<br>n |  |
| RASL12       | 1510.8<br>46001 | 2252.23798  | 769.4540218 | 0.3416<br>39751 | -<br>1.54945<br>2249 | 0.0468<br>02852 | 0.4152<br>22343 | Dow<br>n |  |
| RASSF10      | 150.62<br>43923 | 73.81853722 | 227.4302473 | 3.0809<br>36793 | 1.62336<br>9085      | 0.0065<br>38493 | 0.1314<br>91244 | Up       |  |
| RASSF6       | 167.09<br>42229 | 51.63530771 | 282.5531381 | 5.4720<br>91688 | 2.45209<br>2404      | 0.0039<br>50636 | 0.0998<br>09354 | Up       |  |
| RASSF7       | 186.46<br>88755 | 94.4017237  | 278.5360274 | 2.9505<br>39635 | 1.56097<br>8838      | 0.0119<br>82349 | 0.1929<br>08308 | Up       |  |
| RASSF9       | 359.35<br>28613 | 508.3192042 | 210.3865183 | 0.4138<br>86622 | -<br>1.27269<br>2478 | 0.0281<br>03617 | 0.3110<br>07593 | Dow<br>n |  |
| RAVER2       | 144.71<br>60464 | 244.8333775 | 44.59871524 | 0.1821<br>59458 | -<br>2.45672<br>6195 | 0.0134<br>35791 | 0.2068<br>41546 | Dow<br>n |  |
| RBMS3        | 676.12<br>81709 | 982.3189525 | 369.9373893 | 0.3765<br>96001 | -<br>1.40891<br>0414 | 0.0026<br>35462 | 0.0773<br>14048 | Dow<br>n |  |
| RBP4         | 1354.4<br>01227 | 2010.757538 | 698.0449157 | 0.3471<br>5519  | -<br>1.52634<br>7354 | 0.0008<br>55779 | 0.0373<br>33774 | Dow<br>n |  |
| RBPMS        | 2082.8<br>57153 | 2855.991592 | 1309.722714 | 0.4585<br>87734 | -<br>1.12473<br>0326 | 0.0425<br>51467 | 0.3931<br>014   | Dow<br>n |  |
| RCAN2        | 249.97<br>47057 | 393.9849602 | 105.9644512 | 0.2689<br>55574 | -<br>1.89456<br>0205 | 0.0002<br>21887 | 0.0149<br>77235 | Dow<br>n |  |
| RCN1         | 9291.7<br>20198 | 16027.17297 | 2556.267429 | 0.1594<br>95841 | -<br>2.64840<br>9291 | 0.0013<br>61695 | 0.0494<br>69422 | Dow<br>n |  |
| RCN3         | 3010.7<br>86968 | 5325.945772 | 695.6281642 | 0.1306<br>11199 | -<br>2.93664         | 1.31E-<br>05    | 0.0019<br>4338  | Dow<br>n |  |

|             |                 |             |             |                 |                      |                 |                 |      |
|-------------|-----------------|-------------|-------------|-----------------|----------------------|-----------------|-----------------|------|
|             |                 |             |             |                 | 9489                 |                 |                 |      |
| RDH11       | 1476.3<br>90377 | 671.2250051 | 2281.555748 | 3.3990<br>92303 | 1.76514<br>9539      | 0.0188<br>96604 | 0.2500<br>49761 | Up   |
| RDH13       | 544.10<br>25351 | 326.0673289 | 762.1377413 | 2.3373<br>63096 | 1.22488<br>1866      | 0.0147<br>90492 | 0.2180<br>14284 | Up   |
| RECK        | 925.96<br>21665 | 1467.449052 | 384.4752815 | 0.2620<br>02474 | -<br>1.93234<br>7662 | 0.0001<br>30862 | 0.0101<br>87408 | Down |
| RELB        | 843.44<br>91488 | 468.4154853 | 1218.482812 | 2.6012<br>8636  | 1.37922<br>5225      | 0.0061<br>92145 | 0.1276<br>98793 | Up   |
| RELN        | 760.24<br>77386 | 1288.91297  | 231.5825073 | 0.1796<br>72726 | -<br>2.47655<br>6666 | 7.34E-<br>05    | 0.0068<br>64905 | Down |
| REV3L       | 2061.9<br>63873 | 3094.66663  | 1029.261115 | 0.3325<br>9192  | -<br>1.58817<br>4976 | 0.0296<br>06302 | 0.3214<br>2987  | Down |
| RGMB        | 1432.9<br>22586 | 1936.260042 | 929.5851297 | 0.4800<br>93122 | -<br>1.05861<br>3826 | 0.0300<br>35648 | 0.3239<br>89555 | Down |
| RGS7        | 215.46<br>43894 | 319.098993  | 111.8297859 | 0.3504<br>54838 | -<br>1.51269<br>9554 | 0.0115<br>91967 | 0.1889<br>31861 | Down |
| RGS9        | 324.99<br>54792 | 470.8687614 | 179.1221971 | 0.3804<br>07901 | -<br>1.39438<br>0885 | 0.0084<br>10569 | 0.1517<br>02362 | Down |
| RHBDL1      | 197.09<br>86872 | 277.530443  | 116.6669313 | 0.4203<br>75257 | -<br>1.25025<br>0339 | 0.0146<br>07525 | 0.2163<br>81488 | Down |
| RHBDL2      | 373.21<br>07598 | 194.46303   | 551.9584895 | 2.8383<br>72361 | 1.50506<br>3866      | 0.0053<br>50147 | 0.1173<br>12844 | Up   |
| RHOBTB<br>3 | 2536.4<br>87901 | 3528.856722 | 1544.11908  | 0.4375<br>69219 | -<br>1.19241<br>684  | 0.0202<br>02881 | 0.2606<br>22963 | Down |
| RHOV        | 550.08<br>68224 | 92.19033956 | 1007.983305 | 10.933<br>71941 | 3.45071<br>2353      | 0.0122<br>40717 | 0.1954<br>38959 | Up   |
| RIC3        | 328.65<br>78936 | 125.188396  | 532.1273911 | 4.2506<br>12741 | 2.08767<br>0826      | 0.0001<br>62459 | 0.0118<br>76008 | Up   |
| RIN2        | 1683.2<br>61826 | 1119.959803 | 2246.563848 | 2.0059<br>32571 | 1.00427<br>3111      | 0.0408<br>58424 | 0.3838<br>85602 | Up   |
| RIPK4       | 528.05<br>60949 | 198.0731686 | 858.0390212 | 4.3319<br>29595 | 2.115009<br>796      | 0.0001<br>14547 | 0.0092<br>78785 | Up   |
| RIPPLY3     | 36.362<br>233   | 7.02929861  | 65.69516739 | 9.3459<br>06474 | 3.22433<br>46        | 0.0025<br>982   | 0.0765<br>95778 | Up   |
| RNASE13     | 56.208          | 82.573832   | 29.84359102 | 0.3614          | -                    | 0.0193          | 0.2521          | Down |



|         |                 |             |             |                 |                      |                 |                 |      |
|---------|-----------------|-------------|-------------|-----------------|----------------------|-----------------|-----------------|------|
|         | 71151           |             |             | 17053           | 1.46826<br>3515      | 05851           | 58604           | n    |
| RND1    | 217.96<br>80585 | 69.11732871 | 366.8187882 | 5.3071<br>89891 | 2.40794<br>8169      | 0.0030<br>68759 | 0.0853<br>46759 | Up   |
| RNF121  | 1001.5<br>4331  | 663.9536816 | 1339.132938 | 2.0169<br>07165 | 1.01214<br>4681      | 0.0300<br>06167 | 0.3239<br>69216 | Up   |
| RNF128  | 676.07<br>9723  | 307.4710405 | 1044.688405 | 3.3976<br>80652 | 1.76455<br>026       | 0.0009<br>20148 | 0.0385<br>85331 | Up   |
| RNF183  | 55.002<br>44966 | 13.15285584 | 96.85204349 | 7.3635<br>7523  | 2.88040<br>6407      | 0.0220<br>13121 | 0.2729<br>44996 | Up   |
| RNF39   | 161.43<br>77568 | 86.25454406 | 236.6209694 | 2.7432<br>87    | 1.45590<br>5564      | 0.0179<br>12827 | 0.2434<br>4062  | Up   |
| ROBO3   | 79.832<br>51694 | 148.2649111 | 11.40012278 | 0.0768<br>90228 | -<br>3.70105<br>5937 | 5.28E-<br>08    | 2.97E-<br>05    | Down |
| ROR1    | 359.59<br>64547 | 581.287565  | 137.9053445 | 0.2372<br>41174 | -<br>2.07557<br>3677 | 0.0255<br>27958 | 0.2947<br>2169  | Down |
| ROR2    | 212.16<br>21055 | 342.5902121 | 81.73399891 | 0.2385<br>76573 | -<br>2.06747<br>5707 | 0.0021<br>94733 | 0.0681<br>02096 | Down |
| RORC    | 426.13<br>82954 | 104.7295746 | 747.5470163 | 7.1378<br>7886  | 2.83549<br>5417      | 5.18E-<br>07    | 0.0001<br>93956 | Up   |
| RPS6KA1 | 508.62<br>05027 | 314.9944315 | 702.2465738 | 2.2293<br>93613 | 1.15665<br>1356      | 0.0186<br>03254 | 0.2474<br>42548 | Up   |
| RPS6KA2 | 702.58<br>22967 | 962.5153525 | 442.649241  | 0.4598<br>8798  | -<br>1.12064<br>5605 | 0.0242<br>21091 | 0.2863<br>81143 | Down |
| RRAS    | 1462.9<br>2064  | 2228.596586 | 697.2446933 | 0.3128<br>62677 | -<br>1.67639<br>8534 | 0.0222<br>81658 | 0.2746<br>34033 | Down |
| RSPO2   | 31.739<br>56175 | 50.97184942 | 12.50727407 | 0.2453<br>76109 | -<br>2.02693<br>3308 | 0.0370<br>20562 | 0.3655<br>90756 | Down |
| RSPO3   | 163.29<br>31585 | 305.4242333 | 21.16208364 | 0.0692<br>87507 | -<br>3.85126<br>0946 | 0.0436<br>35919 | 0.3985<br>29575 | Down |
| RTKN    | 535.90<br>27723 | 258.3613541 | 813.4441905 | 3.1484<br>74714 | 1.65465<br>3081      | 0.0045<br>52215 | 0.1070<br>48899 | Up   |
| RTN2    | 129.07<br>36851 | 184.0653098 | 74.08206041 | 0.4024<br>77037 | -<br>1.31302<br>1623 | 0.0207<br>41342 | 0.2645<br>33019 | Down |
| RTN4RL1 | 22.560<br>58406 | 33.13902906 | 11.98213905 | 0.3615<br>7182  | -<br>1.46764         | 0.0361<br>76144 | 0.3612<br>25864 | Down |

|             |                 |             |             |                 |                      |                 |                 |      |
|-------------|-----------------|-------------|-------------|-----------------|----------------------|-----------------|-----------------|------|
|             |                 |             |             |                 | 5852                 |                 |                 |      |
| RTP3        | 44.129<br>30055 | 4.340156555 | 83.91844454 | 19.335<br>34965 | 4.27316<br>8949      | 0.0075<br>39496 | 0.1435<br>49614 | Up   |
| RUNDC3<br>B | 188.76<br>00759 | 67.49049866 | 310.0296531 | 4.5936<br>78506 | 2.19964<br>9892      | 0.0120<br>51442 | 0.1935<br>00973 | Up   |
| RUNX1T1     | 40.959<br>10502 | 61.08857926 | 20.82963078 | 0.3409<br>74222 | -<br>1.55226<br>5421 | 0.0307<br>80244 | 0.3286<br>94256 | Down |
| RXFP2       | 9.8378<br>04848 | 16.66306956 | 3.012540138 | 0.1807<br>91428 | -<br>2.46760<br>182  | 0.0456<br>04189 | 0.4088<br>23597 | Down |
| S100A10     | 3758.1<br>53066 | 5357.283481 | 2159.02265  | 0.4030<br>06983 | -<br>1.311123<br>26  | 0.0101<br>71137 | 0.1733<br>72089 | Down |
| S100A14     | 3900.3<br>4048  | 1476.435827 | 6324.245133 | 4.2834<br>54124 | 2.09877<br>4637      | 0.0336<br>90706 | 0.3456<br>13215 | Up   |
| S100A2      | 4677.2<br>8198  | 284.8960695 | 9069.667891 | 31.835<br>00533 | 4.99254<br>2101      | 0.0029<br>8709  | 0.0848<br>05899 | Up   |
| S100A4      | 7053.0<br>21604 | 12124.81875 | 1981.22446  | 0.1634<br>02398 | -<br>2.61349<br>8938 | 0.0003<br>60139 | 0.0204<br>81347 | Down |
| S100A6      | 136.97<br>49973 | 194.3943237 | 79.55567098 | 0.4092<br>4894  | -<br>1.28894<br>9414 | 0.0125<br>17918 | 0.1984<br>38578 | Down |
| S100A8      | 585.63<br>92046 | 145.0799052 | 1026.198504 | 7.0733<br>33159 | 2.82239<br>0215      | 0.0459<br>54548 | 0.4107<br>59961 | Up   |
| S100A9      | 3709.6<br>96912 | 401.5551768 | 7017.838646 | 17.476<br>64842 | 4.12735<br>6634      | 0.0084<br>20702 | 0.1517<br>32947 | Up   |
| S1PR2       | 699.42<br>53839 | 965.3726377 | 433.4781302 | 0.4490<br>26742 | -<br>1.15512<br>6728 | 0.0308<br>81884 | 0.3290<br>93852 | Down |
| S1PR3       | 221.06<br>3964  | 313.9233306 | 128.2045974 | 0.4083<br>94614 | -<br>1.29196<br>4255 | 0.0406<br>21456 | 0.3832<br>503   | Down |
| S1PR5       | 271.81<br>00128 | 58.62869658 | 484.991329  | 8.2722<br>51598 | 3.04828<br>0065      | 0.0229<br>38933 | 0.2790<br>32639 | Up   |
| SAA3        | 41868.<br>77827 | 587.8826591 | 83149.67389 | 141.43<br>92355 | 7.14403<br>8572      | 0.0002<br>85525 | 0.0171<br>72581 | Up   |
| SACS        | 761.63<br>62649 | 1163.593718 | 359.6788122 | 0.3091<br>10308 | -<br>1.69380<br>6331 | 0.0214<br>61908 | 0.2685<br>71055 | Down |
| SAMD14      | 164.93<br>43262 | 281.0689357 | 48.79971677 | 0.1736<br>21879 | -<br>2.52597<br>9333 | 0.0018<br>76086 | 0.0611<br>18937 | Down |

|         |                 |             |             |                 |                      |                 |                 |      |
|---------|-----------------|-------------|-------------|-----------------|----------------------|-----------------|-----------------|------|
| SAMD4A  | 1915.0<br>27183 | 2808.735058 | 1021.319307 | 0.3636<br>22515 | -<br>1.45948<br>6561 | 0.0363<br>21055 | 0.3613<br>95383 | Down |
| SAMSN1  | 196.58<br>27737 | 100.3782614 | 292.7872859 | 2.9168<br>3958  | 1.54440<br>6043      | 0.0156<br>60753 | 0.2253<br>0186  | Up   |
| SARM1   | 230.06<br>5437  | 315.3123148 | 144.8185592 | 0.4592<br>86087 | -<br>1.12253<br>5014 | 0.0211<br>33008 | 0.2672<br>53788 | Down |
| SAT2    | 71.701<br>94102 | 107.3663098 | 36.03757224 | 0.3356<br>50655 | -<br>1.57496<br>7636 | 0.0193<br>08369 | 0.2521<br>58604 | Down |
| SCARA5  | 4281.8<br>48434 | 7700.383497 | 863.3133696 | 0.1121<br>13036 | -<br>3.15697<br>4061 | 0.0078<br>70939 | 0.1458<br>36369 | Down |
| SCARF2  | 941.93<br>67761 | 1489.229881 | 394.6436714 | 0.2649<br>98491 | -<br>1.91594<br>395  | 6.49E-<br>05    | 0.0063<br>73879 | Down |
| SCEL    | 9.2828<br>45075 | 1.014368127 | 17.55132202 | 17.302<br>71442 | 4.112926<br>478      | 0.0063<br>79205 | 0.1296<br>23999 | Up   |
| SCG3    | 42.002<br>02365 | 73.17172047 | 10.83232683 | 0.1480<br>39799 | -<br>2.75594<br>3008 | 0.0150<br>75206 | 0.2205<br>8375  | Down |
| SCGB1D  | 966.90<br>03663 | 149.3601351 | 1784.440598 | 11.947<br>23476 | 3.57860<br>4834      | 4.07E-<br>10    | 5.23E-<br>07    | Up   |
| SCGB2A2 | 317.04<br>49053 | 29.15170496 | 604.9381056 | 20.751<br>37994 | 4.37513<br>5372      | 0.0037<br>52326 | 0.0961<br>40131 | Up   |
| SCHIP1  | 457.19<br>39542 | 697.9495329 | 216.4383754 | 0.3101<br>06054 | -<br>1.68916<br>6405 | 0.0214<br>76126 | 0.2685<br>71055 | Down |
| SCML1   | 121.55<br>40101 | 193.6780351 | 49.42998509 | 0.2552<br>173   | -<br>1.97020<br>1972 | 0.0018<br>45491 | 0.0607<br>82895 | Down |
| SCML4   | 105.95<br>07016 | 45.10761279 | 166.7937904 | 3.6976<br>86046 | 1.88662<br>2737      | 0.0033<br>0752  | 0.0890<br>11076 | Up   |
| SCN2A   | 26.130<br>60984 | 41.68189946 | 10.57932022 | 0.2538<br>10895 | -<br>1.97817<br>4094 | 0.0163<br>01307 | 0.2293<br>79036 | Down |
| SCN2B   | 42.931<br>72416 | 68.5474694  | 17.31597892 | 0.2526<br>12957 | -<br>1.98499<br>9457 | 0.0051<br>32567 | 0.1149<br>66266 | Down |
| SCN3A   | 352.54<br>64462 | 655.4981393 | 49.59475322 | 0.0756<br>5964  | -<br>3.72433<br>2278 | 7.31E-<br>07    | 0.0002<br>47976 | Down |
| SCN5A   | 88.824          | 3.043104382 | 174.6067277 | 57.377          | 5.84242              | 0.0432          | 0.3964          | Up   |

|         |                 |             |             |                 |                      |                 |                 |      |
|---------|-----------------|-------------|-------------|-----------------|----------------------|-----------------|-----------------|------|
|         | 91606           |             |             | 83061           | 1517                 | 52775           | 39677           |      |
| SCNN1B  | 16.276<br>83389 | 1.6510145   | 30.90265328 | 18.717<br>37243 | 4.22630<br>6016      | 0.0011<br>64501 | 0.0447<br>56666 | Up   |
| SCNN1G  | 165.27<br>56054 | 9.977365283 | 320.5738455 | 32.130<br>11014 | 5.00585<br>4021      | 5.42E-<br>13    | 1.95E-<br>09    | Up   |
| SCRN1   | 364.14<br>74306 | 644.7099218 | 83.58493936 | 0.1296<br>4736  | -<br>2.94733<br>5265 | 2.06E-<br>05    | 0.0027<br>48982 | Down |
| SCX     | 18.483<br>35091 | 31.8825464  | 5.084155416 | 0.1594<br>65162 | -<br>2.64868<br>6822 | 0.0122<br>92589 | 0.1956<br>26218 | Down |
| SDK1    | 778.83<br>31754 | 1116.316538 | 441.3498131 | 0.3953<br>62604 | -<br>1.33875<br>1678 | 0.0130<br>65115 | 0.2032<br>49527 | Down |
| SDR9C7  | 76.078<br>07597 | 21.1350187  | 131.0211332 | 6.1992<br>43781 | 2.63209<br>2238      | 7.87E-<br>05    | 0.0071<br>85859 | Up   |
| SEC1    | 12.578<br>55734 | 3.159076453 | 21.99803822 | 6.9634<br>39646 | 2.79980<br>0113      | 0.0376<br>27977 | 0.3689<br>55236 | Up   |
| SEC14L2 | 42.955<br>08932 | 11.0988343  | 74.81134433 | 6.7404<br>68618 | 2.75284<br>8895      | 0.0289<br>69212 | 0.3168<br>81594 | Up   |
| SEC14L4 | 22.974<br>03659 | 5.895737363 | 40.05233581 | 6.7934<br>39623 | 2.76414<br>2218      | 0.0033<br>11372 | 0.0890<br>11076 | Up   |
| SEC23A  | 1794.1<br>0477  | 2834.968111 | 753.2414298 | 0.2656<br>96615 | -<br>1.91214<br>8249 | 0.0040<br>7828  | 0.1008<br>79923 | Down |
| SEMA3B  | 1366.3<br>72266 | 2246.770158 | 485.9743735 | 0.2162<br>99105 | -<br>2.20890<br>0402 | 1.41E-<br>05    | 0.0020<br>45917 | Down |
| SEMA3C  | 1350.6<br>31547 | 2405.174812 | 296.088282  | 0.1231<br>04683 | -<br>3.02204<br>2455 | 3.17E-<br>06    | 0.0007<br>39905 | Down |
| SEMA3D  | 95.876<br>89543 | 165.4159912 | 26.33779968 | 0.1592<br>21605 | -<br>2.65089<br>198  | 0.0226<br>38216 | 0.2767<br>52579 | Down |
| SEMA4B  | 1037.2<br>1045  | 307.7902562 | 1766.630644 | 5.7397<br>22454 | 2.52098<br>0977      | 0.0010<br>39904 | 0.0412<br>81672 | Up   |
| SEMA4D  | 1131.1<br>17738 | 665.9592777 | 1596.276198 | 2.3969<br>57668 | 1.26120<br>443       | 0.0092<br>00868 | 0.1607<br>96121 | Up   |
| SEMA5A  | 2110.1<br>32072 | 3255.605706 | 964.6584384 | 0.2963<br>06901 | -<br>1.75483<br>5866 | 0.0068<br>41599 | 0.1349<br>04028 | Down |
| SEMA5B  | 147.60<br>98672 | 241.5513514 | 53.66838293 | 0.2221<br>82085 | -<br>2.17018<br>56   | 8.80E-<br>05    | 0.0078<br>7184  | Down |

|                |                 |             |             |                 |                      |                 |                 |      |
|----------------|-----------------|-------------|-------------|-----------------|----------------------|-----------------|-----------------|------|
| 1-Sep          | 146.67<br>95054 | 91.61774154 | 201.7412692 | 2.2019<br>8911  | 1.13880<br>7334      | 0.0312<br>15059 | 0.3313<br>69782 | Up   |
| 5-Sep          | 629.02<br>25981 | 921.706269  | 336.3389273 | 0.3649<br>09016 | -<br>1.45439<br>13   | 0.0029<br>4165  | 0.0839<br>67756 | Down |
| 6-Sep          | 1090.2<br>519   | 1590.153265 | 590.3505352 | 0.3712<br>53858 | -<br>1.42952<br>2075 | 0.0389<br>41198 | 0.3764<br>94384 | Down |
| SERF1A         | 99.412<br>65669 | 150.590597  | 48.23471637 | 0.3203<br>0364  | -<br>1.64248<br>7902 | 0.0063<br>09076 | 0.1287<br>07878 | Down |
| SERPINA<br>1   | 1269.6<br>79785 | 128.703526  | 2410.656043 | 18.730<br>30304 | 4.22730<br>2336      | 2.57E-<br>13    | 1.22E-<br>09    | Up   |
| SERPINA<br>11  | 479.66<br>98065 | 80.14722746 | 879.1923854 | 10.969<br>71677 | 3.45545<br>4372      | 1.69E-<br>09    | 1.90E-<br>06    | Up   |
| SERPINA<br>3-1 | 416.23<br>2808  | 9.623402956 | 822.8422131 | 85.504<br>2875  | 6.41792<br>4859      | 0.0002<br>69593 | 0.0166<br>60134 | Up   |
| SERPINA<br>5   | 662.37<br>92624 | 210.8519439 | 1113.906581 | 5.2828<br>85045 | 2.40132<br>6017      | 1.49E-<br>05    | 0.0021<br>33067 | Up   |
| SERPINB<br>13  | 4.2498<br>61692 | 0           | 8.499723383 | Inf             | Inf                  | 0.0279<br>92297 | 0.3102<br>60263 | Up   |
| SERPINB<br>4   | 28.689<br>55657 | 1.49958676  | 55.87952639 | 37.263<br>28338 | 5.21968<br>2895      | 0.0040<br>68708 | 0.1008<br>79923 | Up   |
| SERPINB<br>5   | 365.81<br>96762 | 155.3255136 | 576.3138388 | 3.7103<br>61713 | 1.89155<br>9838      | 0.0008<br>81401 | 0.0375<br>99374 | Up   |
| SERPINF<br>1   | 4709.2<br>35031 | 8901.724376 | 516.7456851 | 0.0580<br>50066 | -<br>4.10655<br>8489 | 1.02E-<br>05    | 0.0016<br>40363 | Down |
| SERPINF<br>2   | 129.41<br>6078  | 4.967931751 | 253.8642242 | 51.100<br>5861  | 5.67526<br>7933      | 0.0018<br>06712 | 0.0601<br>66867 | Up   |
| SERPING<br>1   | 12378.<br>60851 | 17701.74295 | 7055.47408  | 0.3985<br>75106 | -<br>1.32707<br>6487 | 0.0275<br>94728 | 0.3089<br>65775 | Down |
| SERPINH<br>1   | 13000.<br>82586 | 21639.14332 | 4362.508408 | 0.2016<br>02639 | -<br>2.31041<br>3568 | 1.49E-<br>05    | 0.0021<br>33067 | Down |
| SETBP1         | 719.28<br>58319 | 1020.543867 | 418.0277966 | 0.4096<br>12766 | -<br>1.28766<br>7415 | 0.0467<br>80914 | 0.4152<br>22343 | Down |
| SEZ6L          | 224.66<br>30186 | 447.1058589 | 2.2201782   | 0.0049<br>65666 | -<br>7.65379<br>7163 | 0.0476<br>31322 | 0.4188<br>52847 | Down |
| SFN            | 366.70<br>13169 | 109.6040526 | 623.7985812 | 5.6913<br>8245  | 2.50877<br>9129      | 8.22E-<br>06    | 0.0014<br>21354 | Up   |

|              |                 |             |             |                 |                      |                 |                 |          |
|--------------|-----------------|-------------|-------------|-----------------|----------------------|-----------------|-----------------|----------|
| SFRP1        | 1981.4<br>79877 | 3106.584355 | 856.3753987 | 0.2756<br>64621 | -<br>1.85901<br>3973 | 0.0070<br>43992 | 0.1376<br>87078 | Dow<br>n |
| SFRP2        | 11203.<br>52572 | 19881.59713 | 2525.454305 | 0.1270<br>2472  | -<br>2.97681<br>8813 | 0.0048<br>87754 | 0.1119<br>70041 | Dow<br>n |
| SFRP4        | 4532.4<br>53854 | 8522.162225 | 542.7454828 | 0.0636<br>86359 | -<br>3.97287<br>1796 | 1.56E-<br>05    | 0.0021<br>72137 | Dow<br>n |
| SFXN3        | 1470.3<br>34442 | 2262.426911 | 678.241973  | 0.2997<br>85142 | -<br>1.73799<br>9213 | 0.0003<br>72146 | 0.0208<br>48306 | Dow<br>n |
| SGCA         | 105.21<br>55226 | 192.5507134 | 17.88033169 | 0.0928<br>60376 | -<br>3.42879<br>3064 | 0.0192<br>42645 | 0.2520<br>32404 | Dow<br>n |
| SGCB         | 2033.1<br>85931 | 3264.023506 | 802.348355  | 0.2458<br>1574  | -<br>2.02435<br>0795 | 0.0197<br>90352 | 0.2575<br>18018 | Dow<br>n |
| SGCE         | 551.32<br>81127 | 861.6908829 | 240.9653425 | 0.2796<br>42442 | -<br>1.83834<br>4757 | 0.0002<br>52641 | 0.0161<br>68156 | Dow<br>n |
| SGPP2        | 155.65<br>59824 | 64.0634288  | 247.2485359 | 3.8594<br>33386 | 1.94838<br>9057      | 0.0018<br>04287 | 0.0601<br>66867 | Up       |
| SGTB         | 108.07<br>76769 | 154.1166885 | 62.0386652  | 0.4025<br>43461 | -<br>1.31278<br>3541 | 0.0316<br>53951 | 0.3333<br>79686 | Dow<br>n |
| SH2D2A       | 56.847<br>07908 | 25.99455035 | 87.69960782 | 3.3737<br>68988 | 1.75436<br>1191      | 0.0076<br>84116 | 0.1442<br>416   | Up       |
| SH2D3A       | 86.751<br>05589 | 46.22871487 | 127.2733969 | 2.7531<br>24271 | 1.46106<br>9732      | 0.0179<br>23338 | 0.2434<br>4062  | Up       |
| SH2D4A       | 388.61<br>59223 | 53.2536916  | 723.978153  | 13.594<br>89138 | 3.76499<br>272       | 0.0011<br>47845 | 0.0442<br>95496 | Up       |
| SH3BGR       | 1023.7<br>76569 | 1628.374844 | 419.1782935 | 0.2574<br>21254 | -<br>1.95779<br>6923 | 0.0382<br>00064 | 0.3719<br>28396 | Dow<br>n |
| SH3BP1       | 507.04<br>10132 | 330.9874612 | 683.0945653 | 2.0638<br>07985 | 1.04530<br>875       | 0.0369<br>64537 | 0.3654<br>38851 | Up       |
| SH3PXD2<br>B | 2703.6<br>12285 | 3994.878801 | 1412.34577  | 0.3535<br>39078 | -<br>1.50005<br>8403 | 0.0062<br>86558 | 0.1286<br>45163 | Dow<br>n |
| SH3RF2       | 149.76<br>24795 | 41.01886697 | 258.506092  | 6.3021<br>26586 | 2.65583<br>8733      | 2.14E-<br>05    | 0.0028<br>30347 | Up       |
| SH3TC2       | 640.78<br>30711 | 275.1898945 | 1006.376248 | 3.6570<br>24723 | 1.87067<br>038       | 0.0039<br>96664 | 0.0998<br>22246 | Up       |

|             |                 |             |             |                 |                      |                 |                 |          |
|-------------|-----------------|-------------|-------------|-----------------|----------------------|-----------------|-----------------|----------|
| SHANK1      | 47.845<br>88212 | 83.85672981 | 11.83503443 | 0.1411<br>33985 | -<br>2.82486<br>2667 | 7.37E-<br>05    | 0.0068<br>64905 | Dow<br>n |
| SHOX2       | 251.87<br>58408 | 458.5574194 | 45.1942622  | 0.0985<br>57477 | -<br>3.34289<br>0869 | 8.05E-<br>05    | 0.0072<br>75305 | Dow<br>n |
| SHROOM<br>2 | 120.43<br>65448 | 69.47790247 | 171.3951872 | 2.4669<br>02153 | 1.30270<br>0494      | 0.0377<br>18139 | 0.3692<br>3533  | Up       |
| SHROOM<br>3 | 1575.7<br>98208 | 873.829425  | 2277.766992 | 2.6066<br>49452 | 1.38219<br>6579      | 0.0078<br>75779 | 0.1458<br>36369 | Up       |
| SIDT1       | 100.20<br>51151 | 37.93691653 | 162.4733138 | 4.2827<br>23231 | 2.09852<br>8447      | 0.0075<br>7494  | 0.1435<br>49614 | Up       |
| SIGMAR1     | 820.56<br>41516 | 520.6508795 | 1120.477424 | 2.1520<br>70548 | 1.10572<br>5373      | 0.0288<br>14669 | 0.3157<br>67335 | Up       |
| SIM1        | 16.808<br>19757 | 33.61639513 | 0           | 0               | #NAME<br>?           | 0.0057<br>75802 | 0.1226<br>28401 | Dow<br>n |
| SIM2        | 27.548<br>19989 | 53.58301955 | 1.513380225 | 0.0282<br>43653 | -<br>5.14592<br>9479 | 0.0333<br>28147 | 0.3434<br>37455 | Dow<br>n |
| SIX1        | 54.493<br>32283 | 77.63457592 | 31.35206975 | 0.4038<br>41579 | -<br>1.30813<br>8637 | 0.0374<br>15672 | 0.3678<br>7645  | Dow<br>n |
| SIX4        | 313.57<br>9754  | 148.3357942 | 478.8237138 | 3.2279<br>71485 | 1.69062<br>7834      | 0.0014<br>79304 | 0.0527<br>00957 | Up       |
| SLAMF9      | 46.235<br>84765 | 82.80461723 | 9.667078074 | 0.1167<br>4564  | -<br>3.09855<br>9417 | 6.42E-<br>06    | 0.0012<br>85676 | Dow<br>n |
| SLC10A6     | 42.517<br>36774 | 18.35877785 | 66.67595762 | 3.6318<br>29862 | 1.86069<br>6619      | 0.0091<br>71967 | 0.1607<br>59727 | Up       |
| SLC11A2     | 2629.2<br>89946 | 820.8186184 | 4437.761273 | 5.4065<br>06595 | 2.43469<br>67        | 0.0071<br>20368 | 0.1382<br>7817  | Up       |
| SLC12A4     | 2492.0<br>66663 | 3550.693365 | 1433.439961 | 0.4037<br>07055 | -<br>1.30861<br>9296 | 0.0069<br>54742 | 0.1365<br>36167 | Dow<br>n |
| SLC15A2     | 108.52<br>26341 | 39.8023312  | 177.242937  | 4.4530<br>79296 | 2.15480<br>3302      | 0.0005<br>85901 | 0.0289<br>45751 | Up       |
| SLC16A2     | 254.09<br>64519 | 351.9415272 | 156.2513765 | 0.4439<br>69706 | -<br>1.17146<br>6855 | 0.0200<br>50602 | 0.2597<br>76641 | Dow<br>n |
| SLC16A3     | 277.93<br>82303 | 455.0389048 | 100.8375558 | 0.2216<br>02054 | -<br>2.17395<br>6844 | 0.0003<br>1832  | 0.0187<br>07042 | Dow<br>n |
| SLC17A7     | 48.795<br>47971 | 17.96746705 | 79.62349238 | 4.4315<br>36852 | 2.14780<br>711       | 0.0360<br>93434 | 0.3609<br>94559 | Up       |

|              |                 |             |             |                 |                      |                 |                 |      |
|--------------|-----------------|-------------|-------------|-----------------|----------------------|-----------------|-----------------|------|
| SLC18A2      | 12.552<br>04437 | 4.429544135 | 20.6745446  | 4.6674<br>20386 | 2.22262<br>5414      | 0.0499<br>25845 | 0.4291<br>63853 | Up   |
| SLC1A1       | 698.25<br>03686 | 148.0425155 | 1248.458222 | 8.4331<br>05974 | 3.07606<br>4084      | 0.0059<br>53107 | 0.1246<br>27148 | Up   |
| SLC22A1<br>7 | 993.66<br>31892 | 1394.321642 | 593.0047362 | 0.4252<br>99815 | -<br>1.23344<br>7868 | 0.0075<br>68482 | 0.1435<br>49614 | Down |
| SLC22A3<br>1 | 56.017<br>18322 | 19.66882547 | 92.36554097 | 4.6960<br>37448 | 2.23144<br>3913      | 0.0024<br>09047 | 0.0723<br>23695 | Up   |
| SLC22A5      | 734.12<br>8261  | 383.7696409 | 1084.486881 | 2.8258<br>79813 | 1.49870<br>0108      | 0.0179<br>46909 | 0.2434<br>93904 | Up   |
| SLC24A1      | 30.455<br>48909 | 6.993842941 | 53.91713525 | 7.7092<br>28775 | 2.94658<br>6541      | 0.0320<br>38671 | 0.3356<br>31001 | Up   |
| SLC25A1<br>0 | 819.25<br>84268 | 409.6341994 | 1228.882654 | 2.9999<br>51313 | 1.58493<br>9087      | 0.0031<br>27378 | 0.0859<br>93319 | Up   |
| SLC25A1<br>3 | 238.52<br>16737 | 115.8694607 | 361.1738867 | 3.1170<br>75754 | 1.64019<br>3217      | 0.0039<br>55879 | 0.0998<br>09354 | Up   |
| SLC25A4<br>8 | 169.22<br>5083  | 1.719467717 | 336.7306983 | 195.83<br>4266  | 7.61348<br>9411      | 0.0002<br>3168  | 0.0152<br>61155 | Up   |
| SLC26A2      | 2482.3<br>84724 | 622.0548949 | 4342.714554 | 6.9812<br>40064 | 2.80348<br>3322      | 0.0242<br>006   | 0.2863<br>81143 | Up   |
| SLC26A4      | 69.872<br>83692 | 2.004976828 | 137.740697  | 68.699<br>39598 | 6.10222<br>551       | 0.0013<br>15854 | 0.0484<br>89767 | Up   |
| SLC26A9      | 9.0651<br>14783 | 0.74979338  | 17.38043619 | 23.180<br>30093 | 4.53482<br>7391      | 0.0135<br>07479 | 0.2073<br>28913 | Up   |
| SLC27A6      | 647.21<br>31649 | 317.0674098 | 977.35892   | 3.0824<br>95677 | 1.62409<br>8871      | 0.0045<br>53879 | 0.1070<br>48899 | Up   |
| SLC2A10      | 172.70<br>22978 | 276.4163725 | 68.98822305 | 0.2495<br>80813 | -<br>2.00242<br>1065 | 0.0006<br>2951  | 0.0306<br>78791 | Down |
| SLC2A4       | 235.28<br>49124 | 332.777353  | 137.7924718 | 0.4140<br>68056 | -<br>1.27206<br>0186 | 0.0110<br>20696 | 0.1829<br>96472 | Down |
| SLC30A1      | 217.46<br>83064 | 294.2013651 | 140.7352476 | 0.4783<br>6368  | -<br>1.06382<br>024  | 0.0351<br>74669 | 0.3551<br>63428 | Down |
| SLC35G2      | 24.107<br>3712  | 40.91040879 | 7.304333617 | 0.1785<br>44626 | -<br>2.48564<br>3388 | 0.0042<br>29951 | 0.1025<br>61821 | Down |
| SLC37A1      | 1571.0<br>89153 | 819.8121059 | 2322.366201 | 2.8328<br>0301  | 1.50223<br>0282      | 0.0258<br>43858 | 0.2971<br>54797 | Up   |
| SLC37A2      | 265.81<br>30826 | 145.2929737 | 386.3331914 | 2.6589<br>94317 | 1.41088<br>0694      | 0.0056<br>52563 | 0.1207<br>24517 | Up   |
| SLC38A5      | 117.87          | 227.1194697 | 8.627948284 | 0.0379          | -                    | 0.0003          | 0.0193          | Down |



|              |                 |             |             |                 |                      |                 |                 |      |
|--------------|-----------------|-------------|-------------|-----------------|----------------------|-----------------|-----------------|------|
|              | 3709            |             |             | 88589           | 4.71829<br>0046      | 35433           | 95791           | n    |
| SLC38A7      | 1272.6<br>12673 | 465.7067918 | 2079.518554 | 4.4652<br>95741 | 2.15875<br>573       | 0.0172<br>29584 | 0.2383<br>38158 | Up   |
| SLC39A1<br>2 | 64.471<br>27477 | 105.7277303 | 23.21481919 | 0.2195<br>71716 | -<br>2.18723<br>5868 | 0.0277<br>77946 | 0.3094<br>98642 | Down |
| SLC39A1<br>3 | 1225.7<br>52349 | 1634.772037 | 816.7326613 | 0.4996<br>00338 | -<br>1.001153<br>643 | 0.0418<br>10799 | 0.3885<br>70339 | Down |
| SLC39A1<br>4 | 2592.6<br>00377 | 1701.206295 | 3483.994458 | 2.0479<br>55305 | 1.03418<br>423       | 0.0291<br>78146 | 0.3185<br>88632 | Up   |
| SLC39A2      | 20.913<br>41359 | 4.923237961 | 36.90358921 | 7.4957<br>96365 | 2.90608<br>176       | 0.0126<br>92446 | 0.1999<br>81294 | Up   |
| SLC3A2       | 2471.7<br>7404  | 1539.674088 | 3403.873993 | 2.2107<br>75656 | 1.14455<br>2632      | 0.0299<br>91075 | 0.3239<br>69216 | Up   |
| SLC41A2      | 547.54<br>06649 | 960.7100961 | 134.3712336 | 0.1398<br>66578 | -<br>2.83787<br>6832 | 0.0013<br>35657 | 0.0489<br>27182 | Down |
| SLC44A4      | 116.07<br>87301 | 10.00072873 | 222.1567314 | 22.214<br>05435 | 4.47340<br>0822      | 0.0051<br>54506 | 0.1152<br>90393 | Up   |
| SLC45A3      | 507.68<br>93619 | 206.6031839 | 808.7755399 | 3.9146<br>32509 | 1.96887<br>6879      | 0.0349<br>87888 | 0.3538<br>76846 | Up   |
| SLC46A1      | 124.46<br>15414 | 66.86309041 | 182.0599923 | 2.7228<br>77319 | 1.44513<br>1982      | 0.0094<br>83916 | 0.1641<br>47507 | Up   |
| SLC46A2      | 106.28<br>43575 | 68.58408398 | 143.9846311 | 2.0993<br>88411 | 1.06996<br>9107      | 0.0483<br>3669  | 0.4216<br>64412 | Up   |
| SLC4A4       | 639.93<br>70903 | 1095.217764 | 184.6564161 | 0.1686<br>02466 | -<br>2.56830<br>2455 | 0.0157<br>12127 | 0.2253<br>90999 | Down |
| SLC6A12      | 76.844<br>98548 | 2.912611004 | 150.77736   | 51.767<br>07763 | 5.69396<br>2972      | 0.0022<br>06873 | 0.0683<br>06715 | Up   |
| SLC6A16      | 142.56<br>83656 | 204.2587403 | 80.87799081 | 0.3959<br>58531 | -<br>1.33657<br>875  | 0.0075<br>78378 | 0.1435<br>49614 | Down |
| SLC6A17      | 500.04<br>19097 | 943.7769994 | 56.30682004 | 0.0596<br>61149 | -<br>4.06706<br>4431 | 0.0237<br>02067 | 0.2841<br>56185 | Down |
| SLC6A2       | 213.07<br>12737 | 399.3731582 | 26.76938918 | 0.0670<br>28514 | -<br>3.89908<br>1248 | 7.88E-<br>06    | 0.0013<br>95796 | Down |
| SLC7A10      | 38.344<br>54489 | 69.4227577  | 7.266332088 | 0.1046<br>67869 | -<br>3.25610<br>9468 | 0.0016<br>30578 | 0.0563<br>50885 | Down |

|             |                 |             |             |                 |                      |                 |                 |      |
|-------------|-----------------|-------------|-------------|-----------------|----------------------|-----------------|-----------------|------|
| SLC7A2      | 1169.1<br>84038 | 1932.347538 | 406.0205386 | 0.2101<br>17761 | -<br>2.25072<br>9977 | 0.0155<br>76063 | 0.2249<br>83412 | Down |
| SLC7A8      | 341.63<br>54185 | 168.8885815 | 514.3822555 | 3.0456<br>89951 | 1.60676<br>9084      | 0.0041<br>93679 | 0.1023<br>26896 | Up   |
| SLC8A2      | 39.898<br>36649 | 71.16092417 | 8.635808799 | 0.1213<br>56052 | -<br>3.04268<br>204  | 0.0354<br>13573 | 0.3566<br>27855 | Down |
| SLC9A4      | 10.733<br>33222 | 0           | 21.46666445 | Inf             | Inf                  | 7.98E-<br>05    | 0.0072<br>44239 | Up   |
| SLC9A9      | 120.25<br>21713 | 183.1957048 | 57.30863792 | 0.3128<br>2741  | -<br>1.67656<br>1165 | 0.0031<br>61601 | 0.0866<br>69319 | Down |
| SLCO1C1     | 10.642<br>36706 | 18.52998104 | 2.75475308  | 0.1486<br>64646 | -<br>2.74986<br>649  | 0.0280<br>18833 | 0.3102<br>60263 | Down |
| SLCO4C1     | 78.668<br>6733  | 23.07306817 | 134.2642784 | 5.8190<br>90789 | 2.54079<br>3755      | 0.0001<br>05331 | 0.0088<br>51212 | Up   |
| SLIT2       | 979.41<br>38506 | 1336.473031 | 622.3546701 | 0.4656<br>69457 | -<br>1.10262<br>1837 | 0.0223<br>46171 | 0.2750<br>52151 | Down |
| SLIT3       | 3306.9<br>45364 | 5554.876248 | 1059.014481 | 0.1906<br>45918 | -<br>2.39103<br>2455 | 0.0008<br>0715  | 0.0358<br>7327  | Down |
| SLITRK2     | 378.62<br>95227 | 165.834939  | 591.4241064 | 3.5663<br>4199  | 1.83444<br>5055      | 0.0454<br>08604 | 0.4076<br>79941 | Up   |
| SLITRK4     | 40.406<br>02001 | 67.70241166 | 13.10962836 | 0.1936<br>36062 | -<br>2.36858<br>0438 | 0.0007<br>28778 | 0.0334<br>32691 | Down |
| SLITRK5     | 33.147<br>9032  | 62.47202461 | 3.823781797 | 0.0612<br>07906 | -<br>4.03013<br>8182 | 0.0022<br>91972 | 0.0695<br>05125 | Down |
| SLMAP       | 3644.8<br>35936 | 5893.423628 | 1396.248243 | 0.2369<br>16321 | -<br>2.07755<br>0507 | 0.0479<br>08151 | 0.4200<br>54747 | Down |
| SMAD7       | 508.05<br>41302 | 704.5053506 | 311.6029098 | 0.4423<br>00274 | -<br>1.17690<br>1958 | 0.0172<br>69161 | 0.2387<br>02011 | Down |
| SMAD9       | 317.41<br>86619 | 500.5251618 | 134.312162  | 0.2683<br>42478 | -<br>1.89785<br>2649 | 0.0375<br>96495 | 0.3689<br>55236 | Down |
| SMARCD<br>3 | 1478.3<br>51939 | 2311.565573 | 645.1383062 | 0.2790<br>91501 | -<br>1.841189<br>901 | 0.0122<br>59086 | 0.1954<br>38959 | Down |

|             |                 |             |             |                 |                      |                 |                 |      |
|-------------|-----------------|-------------|-------------|-----------------|----------------------|-----------------|-----------------|------|
| SMIM14      | 3012.3<br>13823 | 4112.94433  | 1911.683317 | 0.4647<br>96789 | -<br>1.10532<br>7993 | 0.0240<br>05744 | 0.2858<br>90928 | Down |
| SMOC2       | 3454.8<br>84214 | 5496.123872 | 1413.644555 | 0.2572<br>0755  | -<br>1.95899<br>5104 | 0.0017<br>76752 | 0.0597<br>2213  | Down |
| SMPDL3<br>B | 34.537<br>95118 | 53.8899993  | 15.18590305 | 0.2817<br>94456 | -<br>1.82728<br>4865 | 0.0210<br>44649 | 0.2665<br>82238 | Down |
| SMTN        | 4918.0<br>27754 | 8351.473445 | 1484.582063 | 0.1777<br>62891 | -<br>2.49197<br>391  | 0.0159<br>89477 | 0.2280<br>00119 | Down |
| SNAI2       | 1162.1<br>33421 | 1696.654249 | 627.6125917 | 0.3699<br>11897 | -<br>1.43474<br>6395 | 0.0070<br>94162 | 0.1379<br>5692  | Down |
| SNPH        | 291.68<br>38583 | 418.9727717 | 164.3949449 | 0.3923<br>76202 | -<br>1.34969<br>0552 | 0.0129<br>59003 | 0.2021<br>17744 | Down |
| SNTA1       | 242.47<br>43437 | 373.6740566 | 111.2746309 | 0.2977<br>85273 | -<br>1.74765<br>5689 | 0.0264<br>8914  | 0.3014<br>90004 | Down |
| SNX7        | 371.00<br>2104  | 508.8428529 | 233.1613551 | 0.4582<br>18787 | -<br>1.12589<br>1483 | 0.0232<br>23708 | 0.2808<br>55371 | Down |
| SOBP        | 229.88<br>22485 | 346.8232636 | 112.9412334 | 0.3256<br>44919 | -<br>1.61862<br>838  | 0.0199<br>73366 | 0.2591<br>72316 | Down |
| SOD2        | 19060.<br>91054 | 2298.343165 | 35823.47792 | 15.586<br>65323 | 3.96223<br>928       | 0.0088<br>30748 | 0.1569<br>203   | Up   |
| SOD3        | 810.44<br>86321 | 1207.017484 | 413.8797807 | 0.3428<br>94603 | -<br>1.54416<br>2898 | 0.0156<br>12639 | 0.2251<br>50029 | Down |
| SORCS1      | 19.429<br>00012 | 33.4481573  | 5.40984293  | 0.1617<br>38145 | -<br>2.62826<br>8121 | 0.0123<br>41684 | 0.1962<br>33868 | Down |
| SORCS2      | 154.91<br>0281  | 220.9207049 | 88.8998571  | 0.4024<br>06181 | -<br>1.31327<br>5631 | 0.0095<br>68337 | 0.1649<br>81835 | Down |
| SORL1       | 1727.2<br>44826 | 955.462907  | 2499.026745 | 2.6155<br>14142 | 1.38709<br>4571      | 0.0238<br>02666 | 0.2848<br>68462 | Up   |
| SOWAHA      | 78.660<br>32373 | 37.24159134 | 120.0790561 | 3.2243<br>26668 | 1.68899<br>7916      | 0.0132<br>03926 | 0.2043<br>42688 | Up   |
| SOX10       | 4079.2<br>7647  | 2217.604142 | 5940.948798 | 2.6789<br>94274 | 1.42169<br>1497      | 0.0161<br>35949 | 0.2286<br>65812 | Up   |

|         |                 |             |             |                 |                      |                 |                 |          |
|---------|-----------------|-------------|-------------|-----------------|----------------------|-----------------|-----------------|----------|
| SOX5    | 64.514<br>75774 | 104.3729018 | 24.65661368 | 0.2362<br>35778 | -<br>2.08170<br>0616 | 0.0185<br>55992 | 0.2472<br>0819  | Dow<br>n |
| SPAG5   | 134.35<br>41675 | 196.910989  | 71.79734589 | 0.3646<br>18279 | -<br>1.45554<br>1208 | 0.0449<br>77468 | 0.4052<br>25358 | Dow<br>n |
| SPARC   | 16793<br>6.1255 | 307757.6706 | 28114.58037 | 0.0913<br>5298  | -<br>3.45240<br>4396 | 0.0002<br>72753 | 0.0167<br>53582 | Dow<br>n |
| SPATA18 | 35.599<br>90394 | 67.17524132 | 4.024566561 | 0.0599<br>11457 | -<br>4.06102<br>4278 | 0.0427<br>21907 | 0.3938<br>6188  | Dow<br>n |
| SPATA20 | 608.24<br>58282 | 1006.76381  | 209.727846  | 0.2083<br>18817 | -<br>2.26313<br>4934 | 0.0002<br>24643 | 0.0150<br>73687 | Dow<br>n |
| SPC24   | 79.737<br>87058 | 125.8278957 | 33.64784546 | 0.2674<br>11652 | -<br>1.90286<br>5765 | 0.0085<br>01302 | 0.1528<br>7891  | Dow<br>n |
| SPDEF   | 203.31<br>55071 | 33.89859684 | 372.7324174 | 10.995<br>51168 | 3.45884<br>2836      | 0.0017<br>48684 | 0.0591<br>10123 | Up       |
| SPEG    | 2134.2<br>45384 | 3109.437691 | 1159.053077 | 0.3727<br>53273 | -<br>1.42370<br>7074 | 0.0305<br>76372 | 0.3272<br>49487 | Dow<br>n |
| SPHK1   | 800.71<br>73609 | 489.1254584 | 1112.309264 | 2.2740<br>77631 | 1.18528<br>1505      | 0.0189<br>90326 | 0.2505<br>90744 | Up       |
| SPINT1  | 1895.3<br>73769 | 364.3614843 | 3426.386055 | 9.4038<br>09685 | 3.23324<br>5342      | 4.95E-<br>05    | 0.0052<br>95566 | Up       |
| SPINT2  | 6461.8<br>14075 | 2723.412995 | 10200.21516 | 3.7453<br>79484 | 1.905111<br>901      | 0.0003<br>74481 | 0.0209<br>13947 | Up       |
| SPON1   | 4929.0<br>36808 | 9226.244387 | 631.829229  | 0.0684<br>81736 | -<br>3.86813<br>6923 | 0.0043<br>0243  | 0.1035<br>75087 | Dow<br>n |
| SPON2   | 1206.3<br>59394 | 2143.90603  | 268.8127581 | 0.1253<br>8458  | -<br>2.99556<br>8156 | 2.63E-<br>08    | 1.97E-<br>05    | Dow<br>n |
| SPP1    | 20689.<br>02631 | 1796.324867 | 39581.72776 | 22.034<br>83817 | 4.46171<br>4396      | 0.0137<br>40814 | 0.2088<br>72938 | Up       |
| SPP2    | 77.017<br>70455 | 145.9813745 | 8.054034617 | 0.0551<br>71659 | -<br>4.17992<br>8827 | 2.87E-<br>09    | 2.87E-<br>06    | Dow<br>n |
| SPSB1   | 1243.4<br>04755 | 1865.279081 | 621.5304297 | 0.3332<br>10422 | -<br>1.58549<br>457  | 0.0252<br>44101 | 0.2934<br>48401 | Dow<br>n |
| SPSB4   | 67.304          | 112.0763605 | 22.53289761 | 0.2010          | -                    | 0.0241          | 0.2863          | Dow      |

|                |                 |             |             |                 |                      |                 |                 |      |
|----------------|-----------------|-------------|-------------|-----------------|----------------------|-----------------|-----------------|------|
|                | 62903           |             |             | 49512           | 2.31437<br>7259      | 11009           | 81143           | n    |
| SPTBN5         | 211.07<br>52108 | 309.9223884 | 112.2280332 | 0.3621<br>16573 | -<br>1.46547<br>3888 | 0.0050<br>91322 | 0.1145<br>89783 | Down |
| SRGAP3         | 194.46<br>83025 | 276.4059755 | 112.5306296 | 0.4071<br>20828 | -<br>1.29647<br>1064 | 0.0150<br>24265 | 0.2203<br>76314 | Down |
| SRL            | 295.57<br>97288 | 447.3621593 | 143.7972984 | 0.3214<br>33754 | -<br>1.63740<br>6658 | 0.0096<br>36773 | 0.1659<br>94345 | Down |
| SRPK3          | 55.228<br>79167 | 92.2688221  | 18.18876124 | 0.1971<br>27923 | -<br>2.34279<br>5949 | 0.0217<br>2795  | 0.2702<br>16954 | Down |
| SRPX           | 710.47<br>15368 | 1148.111709 | 272.8313647 | 0.2376<br>34859 | -<br>2.07318<br>1609 | 2.05E-<br>05    | 0.0027<br>48982 | Down |
| SRPX2          | 319.22<br>70991 | 576.8391833 | 61.61501485 | 0.1068<br>14892 | -<br>3.22681<br>53   | 8.99E-<br>09    | 7.75E-<br>06    | Down |
| SSC5D          | 830.95<br>81982 | 1473.748355 | 188.1680415 | 0.1276<br>79899 | -<br>2.96939<br>6676 | 1.56E-<br>05    | 0.0021<br>72137 | Down |
| SSPN           | 163.34<br>41414 | 254.9730997 | 71.71518314 | 0.2812<br>65683 | -<br>1.82999<br>4552 | 0.0173<br>82153 | 0.2393<br>47196 | Down |
| SSTR1          | 38.019<br>8183  | 59.24056905 | 16.79906755 | 0.2835<br>73703 | -<br>1.81820<br>4342 | 0.0048<br>03033 | 0.1107<br>37156 | Down |
| ST14           | 1959.4<br>08735 | 586.9637488 | 3331.853722 | 5.6764<br>21634 | 2.50498<br>1754      | 2.83E-<br>06    | 0.0006<br>88839 | Up   |
| ST18           | 18.719<br>83329 | 7.588620588 | 29.85104599 | 3.9336<br>59041 | 1.97587<br>1914      | 0.0359<br>90043 | 0.3604<br>00722 | Up   |
| ST3GAL3        | 496.81<br>29797 | 711.5859254 | 282.0400339 | 0.3963<br>54149 | -<br>1.33513<br>8016 | 0.0062<br>1645  | 0.1280<br>31719 | Down |
| ST6GAL2        | 7.0027<br>63648 | 13.75252069 | 0.253006606 | 0.0183<br>97108 | -<br>5.76437<br>7211 | 0.0066<br>69642 | 0.1328<br>24115 | Down |
| ST6GALN<br>AC6 | 706.93<br>45192 | 961.3675713 | 452.5014672 | 0.4706<br>85179 | -<br>1.08716<br>567  | 0.0208<br>73326 | 0.2648<br>48106 | Down |
| ST8SIA5        | 35.591<br>66289 | 55.63373369 | 15.54959209 | 0.2794<br>99344 | -<br>1.83908         | 0.0138<br>50813 | 0.2095<br>7266  | Down |

|        |                 |             |             |                 |                      |                 |                 |      |  |
|--------|-----------------|-------------|-------------|-----------------|----------------------|-----------------|-----------------|------|--|
|        |                 |             |             |                 | 3196                 |                 |                 |      |  |
| STAB1  | 3615.1<br>93352 | 5752.687902 | 1477.698801 | 0.2568<br>71019 | -<br>1.96088<br>3968 | 0.0009<br>53581 | 0.0392<br>37474 | Down |  |
| STAP2  | 599.82<br>37925 | 228.9236336 | 970.7239514 | 4.2403<br>83294 | 2.08419<br>4678      | 0.0001<br>99947 | 0.0140<br>63107 | Up   |  |
| STAR   | 10.950<br>87238 | 1.103755707 | 20.79798905 | 18.842<br>92775 | 4.23595<br>1238      | 0.0026<br>67305 | 0.0779<br>93742 | Up   |  |
| STC2   | 145.91<br>52484 | 29.48611849 | 262.3443782 | 8.8972<br>16443 | 3.15335<br>4049      | 0.0031<br>11821 | 0.0858<br>28028 | Up   |  |
| STEAP3 | 1956.1<br>64531 | 851.6698033 | 3060.65926  | 3.5937<br>15836 | 1.84547<br>6336      | 0.0024<br>02862 | 0.0722<br>58628 | Up   |  |
| STK31  | 70.719<br>16726 | 33.51906864 | 107.9192659 | 3.2196<br>37963 | 1.68689<br>8471      | 0.0081<br>50352 | 0.1481<br>97953 | Up   |  |
| STK32B | 6.0651<br>0342  | 11.39962765 | 0.730579192 | 0.0640<br>87987 | -<br>3.96380<br>2228 | 0.0452<br>69553 | 0.4068<br>37764 | Down |  |
| STK38  | 2459.5<br>46402 | 3413.09738  | 1505.995424 | 0.4412<br>40099 | -<br>1.18036<br>419  | 0.0212<br>35592 | 0.2674<br>98264 | Down |  |
| STRC   | 17.322<br>68194 | 2.936370432 | 31.70899345 | 10.798<br>70343 | 3.43278<br>6197      | 0.0033<br>4925  | 0.0895<br>06851 | Up   |  |
| STXBP2 | 603.97<br>97941 | 386.3278298 | 821.6317583 | 2.1267<br>73416 | 1.08866<br>6338      | 0.0459<br>68785 | 0.4107<br>59961 | Up   |  |
| STYXL1 | 18.833<br>7075  | 32.47257715 | 5.194837853 | 0.1599<br>76149 | -<br>2.64407<br>1263 | 0.0303<br>26032 | 0.3259<br>73117 | Down |  |
| SUCNR1 | 63.718<br>11624 | 110.1646149 | 17.2716176  | 0.1567<br>80084 | -<br>2.67318<br>579  | 0.0013<br>76595 | 0.0498<br>09489 | Down |  |
| SULF1  | 1407.8<br>73081 | 2598.219109 | 217.5270525 | 0.0837<br>21597 | -<br>3.57825<br>6363 | 7.13E-<br>05    | 0.0067<br>50473 | Down |  |
| SUSD4  | 66.316<br>50123 | 120.0769497 | 12.55605272 | 0.1045<br>66719 | -<br>3.25750<br>4338 | 0.0497<br>08297 | 0.4279<br>10147 | Down |  |
| SV2B   | 16.103<br>80622 | 27.22312026 | 4.984492185 | 0.1830<br>97754 | -<br>2.44931<br>3998 | 0.0185<br>19181 | 0.2472<br>0819  | Down |  |
| SVEP1  | 6008.0<br>39571 | 10921.15507 | 1094.92407  | 0.1002<br>57167 | -<br>3.31822<br>2719 | 0.0304<br>80139 | 0.3269<br>73112 | Down |  |
| SVOP   | 28.732<br>66842 | 50.59579382 | 6.869543012 | 0.1357<br>73006 | -<br>2.88073         | 0.0404<br>05026 | 0.3820<br>20813 | Down |  |

|         |                 |             |             |                 |                      |                 |                 |      |
|---------|-----------------|-------------|-------------|-----------------|----------------------|-----------------|-----------------|------|
|         |                 |             |             |                 | 1421                 |                 |                 |      |
| SYBU    | 206.59<br>86673 | 115.3587875 | 297.8385471 | 2.5818<br>45334 | 1.36840<br>2578      | 0.0106<br>99745 | 0.1798<br>25714 | Up   |
| SYN1    | 44.445<br>09861 | 73.5781752  | 15.31202201 | 0.2081<br>05487 | -<br>2.26461<br>3088 | 0.0476<br>95555 | 0.4192<br>12687 | Down |
| SYNC    | 1735.2<br>79515 | 3126.060039 | 344.4989907 | 0.1102<br>02295 | -<br>3.18177<br>3826 | 0.0276<br>09854 | 0.3089<br>65775 | Down |
| SYNE4   | 159.41<br>90027 | 77.76201758 | 241.0759879 | 3.1001<br>76608 | 1.63235<br>0404      | 0.0077<br>46802 | 0.1446<br>63276 | Up   |
| SYNGR1  | 474.43<br>77487 | 255.7977319 | 693.0777655 | 2.7094<br>75805 | 1.43801<br>3764      | 0.0264<br>20977 | 0.3012<br>86255 | Up   |
| SYNPO2  | 5635.6<br>1648  | 9679.299089 | 1591.933872 | 0.1644<br>67887 | -<br>2.60412<br>2173 | 0.0212<br>4159  | 0.2674<br>98264 | Down |
| SYPL2   | 27.264<br>69289 | 45.38744273 | 9.141943054 | 0.2014<br>20096 | -<br>2.311720<br>467 | 0.0230<br>74479 | 0.2798<br>03347 | Down |
| SYT1    | 529.45<br>96087 | 155.4215941 | 903.4976233 | 5.8132<br>05229 | 2.53933<br>3842      | 0.0004<br>21917 | 0.0228<br>84055 | Up   |
| SYT11   | 549.02<br>31966 | 833.7208276 | 264.3255655 | 0.3170<br>43256 | -<br>1.65724<br>8407 | 0.0344<br>21823 | 0.3513<br>09676 | Down |
| SYT12   | 12.154<br>43251 | 3.748203972 | 20.56066105 | 5.4854<br>70163 | 2.45561<br>528       | 0.0318<br>8393  | 0.3351<br>07376 | Up   |
| SYT9    | 83.449<br>99975 | 146.1889117 | 20.71108783 | 0.1416<br>73452 | -<br>2.81935<br>8651 | 9.05E-<br>05    | 0.0079<br>89441 | Down |
| SYTL1   | 238.82<br>088   | 129.6110489 | 348.0307112 | 2.6851<br>93231 | 1.42502<br>5911      | 0.0160<br>83185 | 0.2286<br>35503 | Up   |
| TACC1   | 4141.4<br>85503 | 5700.019012 | 2582.951994 | 0.4531<br>47961 | -<br>1.14194<br>5901 | 0.0157<br>54684 | 0.2253<br>90999 | Down |
| TACR1   | 54.900<br>87295 | 3.869826172 | 105.9319197 | 27.373<br>81862 | 4.77472<br>4798      | 1.39E-<br>08    | 1.14E-<br>05    | Up   |
| TACSTD2 | 473.70<br>39535 | 105.2188062 | 842.1891008 | 8.0041<br>68942 | 3.00075<br>1618      | 0.0145<br>45774 | 0.2160<br>00543 | Up   |
| TAP     | 9.0041<br>6974  | 0.37489669  | 17.63344279 | 47.035<br>47207 | 5.55567<br>7279      | 0.0072<br>57795 | 0.1397<br>39748 | Up   |
| TARP    | 45.906<br>33954 | 22.10226396 | 69.71041513 | 3.1539<br>94327 | 1.65718<br>0065      | 0.0456<br>61395 | 0.4089<br>28717 | Up   |
| TASP1   | 286.55<br>66351 | 180.5673866 | 392.5458836 | 2.1739<br>57827 | 1.12032<br>3954      | 0.0394<br>50551 | 0.3787<br>38227 | Up   |

|         |                 |             |             |                 |                      |                 |                 |      |
|---------|-----------------|-------------|-------------|-----------------|----------------------|-----------------|-----------------|------|
| TBC1D14 | 3198.1<br>50664 | 2102.733553 | 4293.567776 | 2.0418<br>98161 | 1.02991<br>0914      | 0.0487<br>27842 | 0.4237<br>67101 | Up   |
| TBC1D4  | 1106.2<br>43489 | 1579.227016 | 633.2599619 | 0.4009<br>93622 | -<br>1.31834<br>8803 | 0.0097<br>54971 | 0.1673<br>88971 | Down |
| TBC1D8B | 556.45<br>5107  | 791.0347503 | 321.8754637 | 0.4069<br>04328 | -<br>1.29723<br>8468 | 0.0269<br>57683 | 0.3048<br>93092 | Down |
| TBX1    | 53.745<br>45478 | 99.60934013 | 7.881569434 | 0.0791<br>24803 | -<br>3.65972<br>6184 | 5.84E-<br>07    | 0.0002<br>10199 | Down |
| TBX15   | 494.81<br>57104 | 848.8379123 | 140.7935085 | 0.1658<br>66188 | -<br>2.59190<br>8276 | 0.0002<br>16316 | 0.0147<br>34886 | Down |
| TBX18   | 137.37<br>26207 | 240.105181  | 34.64006045 | 0.1442<br>70358 | -<br>2.79315<br>3182 | 0.0127<br>44179 | 0.1999<br>81294 | Down |
| TBX2    | 276.70<br>61711 | 396.3837557 | 157.0285864 | 0.3961<br>5293  | -<br>1.33587<br>062  | 0.0156<br>31845 | 0.2251<br>77623 | Down |
| TBX20   | 16.760<br>25078 | 31.52010888 | 2.000392672 | 0.0634<br>64015 | -<br>3.97791<br>7388 | 0.0032<br>83512 | 0.0887<br>9309  | Down |
| TCEA2   | 355.92<br>70634 | 481.5857157 | 230.2684111 | 0.4781<br>46265 | -<br>1.06447<br>609  | 0.0425<br>43253 | 0.3931<br>014   | Down |
| TCIRG1  | 1673.4<br>03309 | 954.9031682 | 2391.90345  | 2.5048<br>64922 | 1.32473<br>2806      | 0.0190<br>4561  | 0.2509<br>7639  | Up   |
| TENM2   | 133.79<br>37219 | 76.73708309 | 190.8503607 | 2.4870<br>68221 | 1.31444<br>6082      | 0.0379<br>84028 | 0.3704<br>26665 | Up   |
| TENM4   | 236.14<br>49809 | 346.3830035 | 125.9069583 | 0.3634<br>90578 | -<br>1.46001<br>0125 | 0.0033<br>78774 | 0.0900<br>15553 | Down |
| TERT    | 41.123<br>26547 | 16.43282061 | 65.81371034 | 4.0050<br>16053 | 2.00180<br>8025      | 0.0315<br>38144 | 0.3333<br>79686 | Up   |
| TEX101  | 7.9612<br>88487 | 0.3302029   | 15.59237407 | 47.220<br>58489 | 5.56134<br>4006      | 0.0058<br>72907 | 0.1233<br>79064 | Up   |
| TEX26   | 47.012<br>84939 | 83.87995296 | 10.14574583 | 0.1209<br>5555  | -<br>3.04745<br>1129 | 0.0026<br>29108 | 0.0772<br>53661 | Down |
| TF      | 107.98<br>24327 | 181.1862085 | 34.77865692 | 0.1919<br>49802 | -<br>2.381199<br>019 | 0.0003<br>28616 | 0.0190<br>64999 | Down |
| TFAP2A  | 1041.3          | 534.9887685 | 1547.728757 | 2.8930          | 1.53257              | 0.0036          | 0.0955          | Up   |



|         |                 |             |             |                 |                      |                 |                 |      |
|---------|-----------------|-------------|-------------|-----------------|----------------------|-----------------|-----------------|------|
|         | 58763           |             |             | 11681           | 2149                 | 70241           | 81857           |      |
| TFAP2B  | 227.57<br>95463 | 41.56776287 | 413.5913296 | 9.9498<br>09685 | 3.31466<br>8931      | 3.21E-<br>05    | 0.0038<br>14515 | Up   |
| TFAP4   | 177.31<br>78467 | 70.51111378 | 284.1245796 | 4.0295<br>00661 | 2.01060<br>107       | 0.0003<br>6104  | 0.0204<br>81347 | Up   |
| TFPI    | 157.88<br>98222 | 243.5568686 | 72.22277569 | 0.2965<br>3352  | -<br>1.75373<br>2897 | 0.0010<br>2586  | 0.0409<br>12776 | Down |
| TGFA    | 352.51<br>74751 | 129.1250665 | 575.9098837 | 4.4600<br>93606 | 2.15707<br>3989      | 0.0149<br>39641 | 0.2196<br>3364  | Up   |
| TGFB1I1 | 2800.7<br>60272 | 4123.96662  | 1477.553924 | 0.3582<br>84647 | -<br>1.48082<br>1873 | 0.0128<br>51248 | 0.2006<br>98789 | Down |
| TGFB3   | 1408.4<br>14941 | 2388.254811 | 428.5750704 | 0.1794<br>51149 | -<br>2.47833<br>6933 | 0.0326<br>67726 | 0.3397<br>70802 | Down |
| TGFBI   | 2586.7<br>33489 | 4382.195892 | 791.2710854 | 0.1805<br>64974 | -<br>2.46941<br>0032 | 0.0427<br>38311 | 0.3938<br>6188  | Down |
| TGFBR3  | 10750.<br>08662 | 14394.68852 | 7105.484731 | 0.4936<br>18512 | -<br>1.01853<br>1594 | 0.0254<br>84294 | 0.2945<br>84159 | Down |
| TGIF2   | 542.06<br>02056 | 359.1374805 | 724.9829307 | 2.0186<br>78    | 1.01341<br>0804      | 0.0390<br>25928 | 0.3767<br>0599  | Up   |
| THADA   | 855.36<br>65141 | 550.4807899 | 1160.252238 | 2.1077<br>07044 | 1.07567<br>4357      | 0.0429<br>68212 | 0.3944<br>34583 | Up   |
| THBD    | 2274.9<br>8438  | 3822.049786 | 727.9189738 | 0.1904<br>5251  | -<br>2.39249<br>6796 | 0.0018<br>67113 | 0.0611<br>18937 | Down |
| THBS2   | 2857.5<br>88774 | 5244.823137 | 470.3544114 | 0.0896<br>79747 | -<br>3.47907<br>3984 | 5.39E-<br>10    | 6.47E-<br>07    | Down |
| THBS3   | 1878.5<br>5999  | 3621.141742 | 135.9782384 | 0.0375<br>51206 | -<br>4.73499<br>6959 | 3.13E-<br>08    | 2.02E-<br>05    | Down |
| THBS4   | 4506.9<br>9868  | 8634.181537 | 379.8158238 | 0.0439<br>89789 | -<br>4.50668<br>7509 | 0.0363<br>1728  | 0.3613<br>95383 | Down |
| THEM4   | 246.61<br>14623 | 113.5487733 | 379.6741513 | 3.3437<br>09847 | 1.74144<br>9662      | 0.0105<br>26741 | 0.1772<br>49418 | Up   |
| THPO    | 142.15<br>57791 | 258.4784345 | 25.83312373 | 0.0999<br>43052 | -<br>3.32274<br>9909 | 0.0017<br>64957 | 0.0594<br>36744 | Down |
| THRB    | 654.75          | 948.2728546 | 361.2416196 | 0.3809          | -                    | 0.0013          | 0.0487          | Down |

|             |                 |             |             |                 |                      |                 |                 |          |
|-------------|-----------------|-------------|-------------|-----------------|----------------------|-----------------|-----------------|----------|
|             | 72371           |             |             | 46916           | 1.39233<br>8119      | 2629            | 74366           | n        |
| THSD4       | 72.729<br>70576 | 131.3567575 | 14.10265402 | 0.1073<br>61466 | -<br>3.21945<br>1822 | 0.0013<br>82731 | 0.0498<br>68051 | Dow<br>n |
| THY1        | 9920.6<br>51076 | 16677.43936 | 3163.862793 | 0.1897<br>09147 | -<br>2.39813<br>8854 | 1.06E-<br>06    | 0.0003<br>35445 | Dow<br>n |
| TIMP1       | 5952.4<br>50801 | 9768.280988 | 2136.620614 | 0.2187<br>30462 | -<br>2.19277<br>394  | 6.12E-<br>05    | 0.0061<br>42806 | Dow<br>n |
| TIMP2       | 5070.6<br>63594 | 9010.09613  | 1131.231059 | 0.1255<br>51497 | -<br>2.99364<br>8863 | 2.42E-<br>06    | 0.0006<br>00097 | Dow<br>n |
| TLL2        | 117.98<br>64196 | 229.7707553 | 6.202083823 | 0.0269<br>92486 | -<br>5.211298<br>352 | 0.0266<br>87947 | 0.3029<br>85699 | Dow<br>n |
| TLR2        | 1315.6<br>34803 | 405.7298589 | 2225.539747 | 5.4852<br>74743 | 2.45556<br>3883      | 0.0010<br>99184 | 0.0429<br>7092  | Up       |
| TM4SF18     | 964.09<br>63309 | 480.99935   | 1447.193312 | 3.0087<br>2197  | 1.58915<br>0796      | 0.0055<br>40315 | 0.1190<br>34035 | Up       |
| TM4SF5      | 51.080<br>07303 | 16.82543061 | 85.33471544 | 5.0717<br>70073 | 2.34248<br>9343      | 0.0020<br>29769 | 0.0648<br>33633 | Up       |
| TM6SF1      | 340.03<br>48953 | 528.3083179 | 151.7614728 | 0.2872<br>59291 | -<br>1.79957<br>454  | 0.0037<br>1114  | 0.0961<br>00187 | Dow<br>n |
| TMC4        | 893.58<br>13168 | 480.3101324 | 1306.852501 | 2.7208<br>51411 | 1.44405<br>8171      | 0.0059<br>28098 | 0.1242<br>48237 | Up       |
| TMCC2       | 68.084<br>02418 | 102.5233616 | 33.64468677 | 0.3281<br>66052 | -<br>1.60750<br>2094 | 0.0235<br>68677 | 0.2833<br>60894 | Dow<br>n |
| TMCC3       | 253.97<br>79043 | 138.9680948 | 368.9877138 | 2.6551<br>97327 | 1.40881<br>9082      | 0.0160<br>55596 | 0.2284<br>23875 | Up       |
| TMED3       | 1416.2<br>35047 | 2219.01279  | 613.4573045 | 0.2764<br>55056 | -<br>1.85488<br>3139 | 0.0006<br>1875  | 0.0303<br>18754 | Dow<br>n |
| TMEM10<br>2 | 76.469<br>02829 | 31.88311173 | 121.0549449 | 3.7968<br>35952 | 1.92479<br>7666      | 0.0074<br>69774 | 0.1433<br>60676 | Up       |
| TMEM116     | 58.512<br>46882 | 21.62023733 | 95.4047003  | 4.4127<br>49908 | 2.14167<br>7985      | 0.0030<br>72237 | 0.0853<br>46759 | Up       |
| TMEM119     | 1015.6<br>99923 | 1717.821584 | 313.578263  | 0.1825<br>4414  | -<br>2.45368<br>2741 | 6.82E-<br>05    | 0.0065<br>91825 | Dow<br>n |
| TMEM13      | 172.55          | 285.5375566 | 59.57516234 | 0.2086          | -                    | 0.0121          | 0.1940          | Dow      |

|              |                 |             |             |                 |                      |                 |                 |      |
|--------------|-----------------|-------------|-------------|-----------------|----------------------|-----------------|-----------------|------|
| 6            | 63595           |             |             | 42124           | 2.26089<br>7632      | 17044           | 87136           | n    |
| TMEM14<br>4  | 118.35<br>70181 | 59.81096464 | 176.9030716 | 2.9577<br>03035 | 1.56447<br>7207      | 0.0110<br>93948 | 0.1838<br>73541 | Up   |
| TMEM17<br>6A | 1028.7<br>2531  | 203.4797607 | 1853.970859 | 9.1113<br>28091 | 3.18766<br>136       | 0.0001<br>28851 | 0.0101<br>33618 | Up   |
| TMEM17<br>6B | 1192.6<br>97529 | 411.7619001 | 1973.633157 | 4.7931<br>41758 | 2.26097<br>1608      | 0.0011<br>91793 | 0.0453<br>88121 | Up   |
| TMEM20<br>0B | 427.64<br>41492 | 636.4154718 | 218.8728267 | 0.3439<br>14999 | -<br>1.53987<br>6056 | 0.0064<br>77347 | 0.1313<br>21457 | Down |
| TMEM21<br>0  | 5.2990<br>99971 | 0           | 10.59819994 | Inf             | Inf                  | 0.0104<br>52032 | 0.1764<br>87219 | Up   |
| TMEM23<br>3  | 22.217<br>48866 | 0.3302029   | 44.10477442 | 133.56<br>8707  | 7.06143<br>8237      | 0.0478<br>21908 | 0.4199<br>1278  | Up   |
| TMEM25<br>5A | 84.481<br>04276 | 152.4541471 | 16.50793837 | 0.1082<br>81334 | -<br>3.20714<br>3533 | 6.08E-<br>07    | 0.0002<br>14474 | Down |
| TMEM30<br>B  | 776.12<br>99016 | 390.1797209 | 1162.080082 | 2.9783<br>20041 | 1.57449<br>879       | 0.0025<br>97151 | 0.0765<br>95778 | Up   |
| TMEM38<br>A  | 187.70<br>07901 | 277.7653193 | 97.63626084 | 0.3515<br>06304 | -<br>1.50837<br>7531 | 0.0238<br>6223  | 0.2849<br>30945 | Down |
| TMEM45<br>B  | 67.276<br>8218  | 9.860997228 | 124.6926464 | 12.645<br>03412 | 3.66049<br>9024      | 0.0006<br>5095  | 0.0313<br>10458 | Up   |
| TMEM47       | 360.70<br>53378 | 568.5906668 | 152.8200089 | 0.2687<br>69816 | -<br>1.89555<br>6968 | 0.0033<br>44134 | 0.0895<br>06851 | Down |
| TMEM55<br>A  | 48.692<br>10997 | 70.30482187 | 27.07939808 | 0.3851<br>71278 | -<br>1.37642<br>7969 | 0.0327<br>66907 | 0.3403<br>25045 | Down |
| TMEM59<br>L  | 1033.7<br>15983 | 1929.541169 | 137.8907977 | 0.0714<br>62999 | -<br>3.80665<br>974  | 0.0041<br>36942 | 0.1015<br>53829 | Down |
| TMEM65       | 389.22<br>40177 | 551.4881532 | 226.9598823 | 0.4115<br>40812 | -<br>1.28089<br>2588 | 0.0149<br>6142  | 0.2196<br>3364  | Down |
| TMEM74<br>B  | 30.574<br>66771 | 3.441760499 | 57.70757492 | 16.766<br>87699 | 4.06754<br>2092      | 0.0065<br>88831 | 0.1316<br>52164 | Up   |
| TMEM79       | 157.39<br>62805 | 74.67783644 | 240.1147246 | 3.2153<br>41205 | 1.68497<br>1841      | 0.0185<br>23092 | 0.2472<br>0819  | Up   |
| TMEM92       | 39.634<br>5677  | 75.97036759 | 3.298767821 | 0.0434<br>2177  | -<br>4.52543<br>7657 | 0.0017<br>23148 | 0.0583<br>56617 | Down |

|               |                 |             |             |                 |                      |                 |                 |      |
|---------------|-----------------|-------------|-------------|-----------------|----------------------|-----------------|-----------------|------|
| TMEM98        | 354.92<br>76265 | 546.5308742 | 163.3243788 | 0.2988<br>38339 | -<br>1.74256<br>2845 | 0.0047<br>24317 | 0.1099<br>96813 | Down |
| TMOD1         | 392.39<br>81296 | 681.200428  | 103.5958311 | 0.1520<br>78341 | -<br>2.717113<br>394 | 0.0086<br>48152 | 0.1547<br>45994 | Down |
| TMOD2         | 456.99<br>63348 | 708.2411377 | 205.7515319 | 0.2905<br>10563 | -<br>1.78333<br>7472 | 0.0066<br>4321  | 0.1324<br>44397 | Down |
| TMPRSS2       | 727.40<br>88828 | 239.2557441 | 1215.562021 | 5.0805<br>97024 | 2.34499<br>8039      | 1.10E-<br>05    | 0.0017<br>41648 | Up   |
| TNF           | 90.911<br>82007 | 26.51124067 | 155.3123995 | 5.8583<br>60285 | 2.55049<br>6921      | 0.0218<br>05587 | 0.2709<br>95075 | Up   |
| TNFAIP2       | 1051.0<br>53947 | 362.1379848 | 1739.969909 | 4.8047<br>1528  | 2.26445<br>0942      | 0.0330<br>98675 | 0.3430<br>0573  | Up   |
| TNFAIP3       | 481.87<br>94591 | 299.0243693 | 664.7345488 | 2.2230<br>11289 | 1.15251<br>5275      | 0.0188<br>84399 | 0.2500<br>49761 | Up   |
| TNFAIP6       | 415.45<br>8871  | 698.3595259 | 132.5582161 | 0.1898<br>13715 | -<br>2.39734<br>3856 | 0.0089<br>36859 | 0.1577<br>14947 | Down |
| TNFAIP8<br>L3 | 510.11<br>11201 | 944.5700394 | 75.65220084 | 0.0800<br>91679 | -<br>3.64220<br>3817 | 0.0003<br>21624 | 0.0187<br>78427 | Down |
| TNFRSF1<br>2A | 1122.3<br>07729 | 1807.555654 | 437.0598035 | 0.2417<br>96042 | -<br>2.04813<br>7464 | 0.0459<br>51532 | 0.4107<br>59961 | Down |
| TNFRSF2<br>1  | 3745.8<br>81477 | 1658.172276 | 5833.590677 | 3.5180<br>84798 | 1.81479<br>0257      | 0.0008<br>67917 | 0.0374<br>03027 | Up   |
| TNFSF11       | 92.230<br>88856 | 5.615878381 | 178.8458987 | 31.846<br>46935 | 4.99306<br>1532      | 0.0002<br>67495 | 0.0165<br>87444 | Up   |
| TNFSF18       | 83.342<br>0845  | 143.1803266 | 23.50384244 | 0.1641<br>5553  | -<br>2.60686<br>4741 | 0.0041<br>80414 | 0.1021<br>75662 | Down |
| TNIP3         | 64.088<br>19745 | 0.6604058   | 127.5159891 | 193.08<br>73246 | 7.59310<br>965       | 0.0012<br>54354 | 0.0468<br>96152 | Up   |
| TNK1          | 340.29<br>35768 | 134.5443991 | 546.0427544 | 4.0584<br>57713 | 2.02093<br>1581      | 0.0002<br>42956 | 0.0157<br>72861 | Up   |
| TNMD          | 12.193<br>11245 | 22.34305024 | 2.043174653 | 0.0914<br>45646 | -<br>3.45094<br>1716 | 0.0021<br>62652 | 0.0673<br>26013 | Down |
| TNS1          | 10368.<br>35433 | 14545.69893 | 6191.009725 | 0.4256<br>24768 | -<br>1.23234<br>599  | 0.0165<br>42855 | 0.2324<br>14189 | Down |
| TNS4          | 235.31          | 101.7408271 | 368.8900354 | 3.6257          | 1.85829              | 0.0022          | 0.0683          | Up   |

|             |                 |             |             |                 |                      |                 |                 |          |
|-------------|-----------------|-------------|-------------|-----------------|----------------------|-----------------|-----------------|----------|
|             | 54313           |             |             | 81762           | 2091                 | 19576           | 46977           |          |
| TNXB        | 7779.9<br>24031 | 12427.64903 | 3132.19903  | 0.2520<br>34719 | -<br>1.98830<br>561  | 4.33E-<br>05    | 0.0047<br>96668 | Dow<br>n |
| TOP1MT      | 37.904<br>22766 | 13.13644174 | 62.67201359 | 4.7708<br>51563 | 2.25424<br>68        | 0.0052<br>73413 | 0.1166<br>89318 | Up       |
| TOP2A       | 514.59<br>27362 | 769.4013438 | 259.7841287 | 0.3376<br>44496 | -<br>1.56642<br>3056 | 0.0316<br>24686 | 0.3333<br>79686 | Dow<br>n |
| TP53INP2    | 731.80<br>38949 | 1056.212425 | 407.3953648 | 0.3857<br>13475 | -<br>1.37439<br>8547 | 0.0474<br>43579 | 0.4178<br>14833 | Dow<br>n |
| TP63        | 784.89<br>81645 | 299.096012  | 1270.700317 | 4.2484<br>69609 | 2.08694<br>3245      | 0.0206<br>37004 | 0.2637<br>63504 | Up       |
| TPBG        | 1112.5<br>1498  | 2080.116639 | 144.913321  | 0.0696<br>65959 | -<br>3.84340<br>2303 | 0.0135<br>48774 | 0.2077<br>13209 | Dow<br>n |
| TPM1        | 17799.<br>01854 | 28940.19261 | 6657.844464 | 0.2300<br>55292 | -<br>2.119947<br>451 | 0.0243<br>86674 | 0.2865<br>8018  | Dow<br>n |
| TPM2        | 32963.<br>00768 | 59552.70348 | 6373.311885 | 0.1070<br>1969  | -<br>3.22405<br>1835 | 0.0242<br>99    | 0.2863<br>81143 | Dow<br>n |
| TPST1       | 460.34<br>40141 | 646.3542185 | 274.3338096 | 0.4244<br>32613 | -<br>1.23639<br>258  | 0.0208<br>36781 | 0.2648<br>11184 | Dow<br>n |
| TPX2        | 323.19<br>02131 | 465.5439435 | 180.8364827 | 0.3884<br>41274 | -<br>1.36423<br>1591 | 0.0247<br>62228 | 0.2895<br>31304 | Dow<br>n |
| TRABD2<br>B | 826.58<br>01069 | 1220.562442 | 432.5977718 | 0.3544<br>24941 | -<br>1.49644<br>7963 | 0.0054<br>07659 | 0.1173<br>98861 | Dow<br>n |
| TRAF2       | 1220.1<br>59251 | 757.1268596 | 1683.191643 | 2.2231<br>30275 | 1.15259<br>2492      | 0.0176<br>7941  | 0.2414<br>03825 | Up       |
| TRAF5       | 339.35<br>48981 | 545.4171947 | 133.2926016 | 0.2443<br>86504 | -<br>2.03276<br>3477 | 0.0385<br>37724 | 0.3735<br>97781 | Dow<br>n |
| TRAM2       | 2213.7<br>10584 | 3323.262248 | 1104.15892  | 0.3322<br>51516 | -<br>1.58965<br>2312 | 0.0107<br>83792 | 0.1810<br>69027 | Dow<br>n |
| TRAT1       | 70.658<br>23863 | 39.11118759 | 102.2052897 | 2.6131<br>98319 | 1.38581<br>6617      | 0.0211<br>85037 | 0.2674<br>34348 | Up       |
| TREM2       | 123.25<br>04383 | 21.69549959 | 224.8053771 | 10.361<br>84376 | 3.37320<br>8831      | 4.80E-<br>05    | 0.0051<br>72796 | Up       |

|        |                 |             |             |                 |                      |                 |                 |          |
|--------|-----------------|-------------|-------------|-----------------|----------------------|-----------------|-----------------|----------|
| TRERF1 | 324.76<br>63312 | 493.6282011 | 155.9044613 | 0.3158<br>33781 | -<br>1.66276<br>2606 | 0.0022<br>64042 | 0.0691<br>24396 | Dow<br>n |
| TRIM14 | 116.47<br>23292 | 63.7962266  | 169.1484318 | 2.6513<br>86153 | 1.40674<br>6802      | 0.0223<br>31698 | 0.2750<br>52151 | Up       |
| TRIM29 | 665.04<br>0081  | 328.4526565 | 1001.627506 | 3.0495<br>33885 | 1.60858<br>8747      | 0.0031<br>20784 | 0.0859<br>4342  | Up       |
| TRIM34 | 373.68<br>28967 | 247.4940431 | 499.8717504 | 2.0197<br>32452 | 1.01416<br>4196      | 0.0399<br>89995 | 0.3806<br>98819 | Up       |
| TRIM36 | 218.49<br>98983 | 139.9041489 | 297.0956477 | 2.1235<br>6567  | 1.08648<br>8724      | 0.0432<br>52142 | 0.3964<br>39677 | Up       |
| TRIM46 | 75.449<br>48081 | 8.698422409 | 142.2005392 | 16.347<br>85396 | 4.03102<br>9355      | 0.0493<br>42048 | 0.4266<br>24205 | Up       |
| TRNP1  | 112.79<br>69602 | 164.0207134 | 61.57320699 | 0.3753<br>98971 | -<br>1.41350<br>34   | 0.0188<br>59661 | 0.2499<br>28729 | Dow<br>n |
| TRPC2  | 134.07<br>40851 | 84.77902559 | 183.3691446 | 2.1629<br>06961 | 1.112971<br>608      | 0.0402<br>70924 | 0.3815<br>3544  | Up       |
| TRPM3  | 88.485<br>46205 | 142.8893408 | 34.08158331 | 0.2385<br>17325 | -<br>2.06783<br>4034 | 0.0005<br>6028  | 0.0281<br>43901 | Dow<br>n |
| TRPV6  | 265.93<br>20245 | 22.0547451  | 509.8093038 | 23.115<br>62892 | 4.53079<br>671       | 0.0043<br>44756 | 0.1043<br>14742 | Up       |
| TSHZ3  | 302.56<br>22971 | 453.1595832 | 151.9650111 | 0.3353<br>45465 | -<br>1.57628<br>0003 | 0.0055<br>47182 | 0.1190<br>3934  | Dow<br>n |
| TSPAN1 | 212.05<br>00499 | 6.4135866   | 417.6865132 | 65.125<br>26286 | 6.02514<br>5385      | 0.0002<br>80188 | 0.0170<br>70046 | Up       |
| TSPAN3 | 2982.0<br>24968 | 1762.762787 | 4201.28715  | 2.3833<br>53666 | 1.25299<br>3049      | 0.0216<br>18328 | 0.2692<br>75749 | Up       |
| TTC6   | 14.594<br>59375 | 3.138142091 | 26.05104541 | 8.3014<br>23152 | 3.05335<br>8686      | 0.0056<br>64952 | 0.1207<br>54788 | Up       |
| TTLL7  | 370.32<br>40392 | 524.4822789 | 216.1657995 | 0.4121<br>50816 | -<br>1.27875<br>5742 | 0.0058<br>39287 | 0.1231<br>80712 | Dow<br>n |
| TUBA1A | 3822.1<br>39962 | 5590.913806 | 2053.366117 | 0.3672<br>68427 | -<br>1.44509<br>3219 | 0.0052<br>98398 | 0.1170<br>22127 | Dow<br>n |
| TUBA1D | 23.800<br>35186 | 8.225266961 | 39.37543676 | 4.7871<br>31767 | 2.25916<br>1517      | 0.0110<br>93966 | 0.1838<br>73541 | Up       |
| TUBA4A | 831.79<br>29105 | 270.6422921 | 1392.943529 | 5.1468<br>06578 | 2.36367<br>7566      | 0.0079<br>05114 | 0.1458<br>36369 | Up       |
| TUBB2B | 238.76<br>74034 | 331.1762906 | 146.3585162 | 0.4419<br>35369 | -<br>1.17809         | 0.0204<br>73801 | 0.2623<br>69556 | Dow<br>n |

|        |                 |             |             |                 |                      |                 |                 |      |
|--------|-----------------|-------------|-------------|-----------------|----------------------|-----------------|-----------------|------|
|        |                 |             |             |                 | 2697                 |                 |                 |      |
| TUBD1  | 163.55<br>44423 | 85.80266088 | 241.3062236 | 2.8123<br>39631 | 1.49177<br>0831      | 0.0079<br>01603 | 0.1458<br>36369 | Up   |
| TWIST1 | 356.35<br>41153 | 533.3011431 | 179.4070875 | 0.3364<br>08594 | -<br>1.57171<br>3535 | 0.0192<br>18809 | 0.2520<br>32404 | Down |
| TXK    | 84.279<br>83936 | 38.93204549 | 129.6276332 | 3.3295<br>87017 | 1.73534<br>3245      | 0.0075<br>52873 | 0.1435<br>49614 | Up   |
| TYR    | 4.4552<br>8348  | 0.353962327 | 8.556604634 | 24.173<br>77211 | 4.59537<br>0706      | 0.0424<br>88969 | 0.3931<br>014   | Up   |
| UBALD2 | 935.82<br>54181 | 586.1079274 | 1285.542909 | 2.1933<br>55266 | 1.13313<br>9509      | 0.0364<br>80558 | 0.3626<br>36342 | Up   |
| UGGT2  | 280.01<br>74111 | 499.0432683 | 60.99155385 | 0.1222<br>16965 | -<br>3.03248<br>353  | 1.98E-<br>06    | 0.0005<br>48355 | Down |
| UMODL1 | 18.772<br>46709 | 37.03414052 | 0.510793663 | 0.0137<br>92508 | -<br>6.17997<br>1418 | 3.81E-<br>05    | 0.0043<br>46368 | Down |
| UNC5C  | 103.31<br>00477 | 154.052504  | 52.56759144 | 0.3412<br>31658 | -<br>1.551176<br>593 | 0.0121<br>73005 | 0.1945<br>84125 | Down |
| USP43  | 213.02<br>88912 | 88.6172115  | 337.440571  | 3.8078<br>44608 | 1.92897<br>4606      | 0.0008<br>91818 | 0.0379<br>1386  | Up   |
| UST    | 474.09<br>53323 | 733.5087523 | 214.6819122 | 0.2926<br>78051 | -<br>1.77261<br>3537 | 0.0140<br>10259 | 0.2108<br>08596 | Down |
| UTP20  | 750.94<br>96565 | 491.6918766 | 1010.207436 | 2.0545<br>53846 | 1.03882<br>5142      | 0.0416<br>17644 | 0.3869<br>75227 | Up   |
| VASN   | 1076.3<br>82501 | 1475.35314  | 677.4118627 | 0.4591<br>52351 | -<br>1.12295<br>5162 | 0.0262<br>61336 | 0.3002<br>27342 | Down |
| VAV3   | 806.20<br>74036 | 384.5024201 | 1227.912387 | 3.1935<br>10165 | 1.67514<br>3043      | 0.0051<br>2546  | 0.1149<br>66266 | Up   |
| VCAN   | 7334.3<br>51524 | 12372.85654 | 2295.84651  | 0.1855<br>5509  | -<br>2.43008<br>0517 | 0.0065<br>10851 | 0.1314<br>08124 | Down |
| VCL    | 12840.<br>17508 | 18985.03033 | 6695.319824 | 0.3526<br>63109 | -<br>1.50363<br>7426 | 0.0204<br>22089 | 0.2623<br>69556 | Down |
| VCPKMT | 256.83<br>27968 | 158.9991884 | 354.6664052 | 2.2306<br>17707 | 1.15744<br>328       | 0.0237<br>93281 | 0.2848<br>68462 | Up   |
| VGLL1  | 11.990<br>13063 | 2.689142055 | 21.2911192  | 7.9174<br>39379 | 2.98503<br>3916      | 0.0379<br>78522 | 0.3704<br>26665 | Up   |
| VGLL3  | 3012.1          | 5326.866773 | 697.460388  | 0.1309          | -                    | 0.0069          | 0.1359          | Down |

|             |                 |             |             |                 |                      |                 |                 |          |
|-------------|-----------------|-------------|-------------|-----------------|----------------------|-----------------|-----------------|----------|
|             | 63581           |             |             | 32576           | 2.93310<br>4012      | 1603            | 2456            | n        |
| VIM         | 47138.<br>04797 | 71097.51572 | 23178.58022 | 0.3260<br>11113 | -<br>1.61700<br>6952 | 0.0006<br>13613 | 0.0301<br>49166 | Dow<br>n |
| VIPR2       | 122.80<br>73064 | 204.5160188 | 41.09859408 | 0.2009<br>55379 | -<br>2.31505<br>29   | 0.0094<br>09552 | 0.1631<br>74521 | Dow<br>n |
| VKORC1      | 890.76<br>55872 | 1279.122228 | 502.4089462 | 0.3927<br>76339 | -<br>1.34822<br>007  | 0.0054<br>24846 | 0.1175<br>36162 | Dow<br>n |
| VNN1        | 517.27<br>17827 | 160.5475144 | 873.9960509 | 5.4438<br>46666 | 2.44462<br>6432      | 0.0414<br>54773 | 0.3862<br>50226 | Up       |
| VSNL1       | 92.294<br>5798  | 32.26608763 | 152.323072  | 4.7208<br>41081 | 2.23904<br>3918      | 0.0003<br>54701 | 0.0202<br>49495 | Up       |
| VSTM4       | 640.76<br>19498 | 1063.401948 | 218.1219519 | 0.2051<br>17127 | -<br>2.28548<br>0138 | 0.0077<br>02384 | 0.1443<br>34849 | Dow<br>n |
| VWA5B2      | 15.737<br>2583  | 27.95596326 | 3.518553349 | 0.1258<br>60566 | -<br>2.99010<br>1763 | 0.0052<br>7545  | 0.1166<br>89318 | Dow<br>n |
| VWA7        | 95.365<br>77173 | 33.34518068 | 157.3863628 | 4.7199<br>1333  | 2.23876<br>0368      | 0.0008<br>55441 | 0.0373<br>33774 | Up       |
| WARS        | 11588.<br>48219 | 6342.368825 | 16834.59555 | 2.6543<br>07249 | 1.40833<br>5379      | 0.0047<br>15758 | 0.1099<br>91532 | Up       |
| WASF3       | 554.51<br>00364 | 776.9253766 | 332.0946962 | 0.4274<br>47354 | -<br>1.22618<br>1353 | 0.0117<br>94162 | 0.1910<br>76043 | Dow<br>n |
| WBP5        | 91.622<br>82858 | 163.1654853 | 20.08017187 | 0.1230<br>66296 | -<br>3.02249<br>2391 | 3.91E-<br>06    | 0.0008<br>63637 | Dow<br>n |
| WDR17       | 260.48<br>16691 | 388.588649  | 132.3746892 | 0.3406<br>55059 | -<br>1.55361<br>6462 | 0.0103<br>85626 | 0.1756<br>95878 | Dow<br>n |
| WFDC1       | 1423.4<br>92838 | 2448.830991 | 398.1546853 | 0.1625<br>89696 | -<br>2.62069<br>2268 | 0.0198<br>3976  | 0.2579<br>7426  | Dow<br>n |
| WFDC18      | 151.72<br>65501 | 9.437282475 | 294.0158177 | 31.154<br>71201 | 4.96137<br>8476      | 0.0039<br>85514 | 0.0998<br>09354 | Up       |
| WFDC2       | 307.32<br>78765 | 24.53005231 | 590.1257008 | 24.057<br>25407 | 4.58840<br>0075      | 0.0009<br>403   | 0.0389<br>61794 | Up       |
| WFIKKN<br>2 | 90.156<br>22735 | 174.2541533 | 6.058301353 | 0.0347<br>67041 | -<br>4.84613<br>589  | 0.0005<br>35659 | 0.0272<br>72595 | Dow<br>n |



|        |                 |             |             |                 |                      |                 |                 |      |
|--------|-----------------|-------------|-------------|-----------------|----------------------|-----------------|-----------------|------|
| WIPF1  | 1444.1<br>98976 | 2002.48179  | 885.9161615 | 0.4424<br>09098 | -<br>1.17654<br>7042 | 0.0308<br>20823 | 0.3288<br>61594 | Down |
| WISP2  | 1266.9<br>13991 | 2148.373373 | 385.4546081 | 0.1794<br>16955 | -<br>2.478611<br>866 | 0.0149<br>21699 | 0.2196<br>3364  | Down |
| WISP3  | 32.800<br>32285 | 7.5258175   | 58.0748282  | 7.7167<br>46812 | 2.94799<br>2771      | 0.0013<br>48275 | 0.0492<br>60724 | Up   |
| WNT10A | 102.81<br>70977 | 21.18293354 | 184.4512618 | 8.7075<br>40978 | 3.12226<br>5357      | 0.0168<br>73058 | 0.2356<br>37319 | Up   |
| WNT10B | 17.061<br>31632 | 28.17355543 | 5.949077218 | 0.2111<br>58199 | -<br>2.24360<br>383  | 0.0291<br>68238 | 0.3185<br>88632 | Down |
| WNT2   | 56.706<br>29014 | 105.9074619 | 7.505118381 | 0.0708<br>64869 | -<br>3.81878<br>5602 | 8.73E-<br>07    | 0.0002<br>90872 | Down |
| WNT2B  | 25.184<br>32126 | 44.05267515 | 6.315967367 | 0.1433<br>73072 | -<br>2.80215<br>4009 | 0.0012<br>52022 | 0.0468<br>96152 | Down |
| WNT4   | 246.04<br>93135 | 152.53932   | 339.5593069 | 2.2260<br>44452 | 1.15448<br>2402      | 0.0481<br>43467 | 0.4204<br>12522 | Up   |
| WNT5B  | 159.39<br>87043 | 51.29866271 | 267.4987459 | 5.2145<br>36438 | 2.38253<br>9006      | 5.30E-<br>05    | 0.0055<br>46252 | Up   |
| WNT9A  | 87.691<br>16501 | 123.6604175 | 51.72191249 | 0.4182<br>57625 | -<br>1.25753<br>6255 | 0.0194<br>28922 | 0.2531<br>8274  | Down |
| WTIP   | 452.67<br>90396 | 621.4195428 | 283.9385364 | 0.4569<br>19226 | -<br>1.12998<br>8947 | 0.0227<br>6276  | 0.2777<br>08764 | Down |
| WWC1   | 1556.4<br>53622 | 520.3514699 | 2592.555773 | 4.9823<br>16614 | 2.31681<br>6704      | 0.0071<br>68515 | 0.1387<br>63631 | Up   |
| XAF1   | 268.19<br>14456 | 138.1285751 | 398.254316  | 2.8832<br>14538 | 1.52767<br>8191      | 0.0189<br>56276 | 0.2505<br>90744 | Up   |
| XG     | 1595.0<br>57673 | 2471.325276 | 718.7900711 | 0.2908<br>5207  | -<br>1.78164<br>2525 | 0.0004<br>10108 | 0.0224<br>16334 | Down |
| XKR5   | 21.111<br>33955 | 34.60355614 | 7.619122968 | 0.2201<br>83236 | -<br>2.18322<br>3463 | 0.0070<br>95818 | 0.1379<br>5692  | Down |
| XYLT1  | 983.85<br>4517  | 1554.682346 | 413.0266883 | 0.2656<br>66288 | -<br>1.91231<br>2926 | 5.94E-<br>05    | 0.0060<br>31493 | Down |
| YDJC   | 44.001<br>29597 | 19.70747315 | 68.29511879 | 3.4654<br>42691 | 1.79303<br>9661      | 0.0121<br>23498 | 0.1940<br>87136 | Up   |

|         |                 |             |             |                 |                      |                 |                 |      |
|---------|-----------------|-------------|-------------|-----------------|----------------------|-----------------|-----------------|------|
| ZAP70   | 727.64<br>84686 | 384.9289931 | 1070.367944 | 2.7806<br>8933  | 1.47544<br>257       | 0.0051<br>15481 | 0.1149<br>66266 | Up   |
| ZBED3   | 130.41<br>72135 | 208.9378589 | 51.89656801 | 0.2483<br>82788 | -<br>2.00936<br>2889 | 0.0211<br>14755 | 0.2672<br>10868 | Down |
| ZBTB42  | 459.08<br>82436 | 224.7002693 | 693.4762179 | 3.0862<br>278   | 1.62584<br>4554      | 0.0034<br>13339 | 0.0904<br>00692 | Up   |
| ZBTB47  | 1683.8<br>05645 | 2268.460442 | 1099.150848 | 0.4845<br>36044 | -<br>1.04532<br>4106 | 0.0161<br>13706 | 0.2286<br>65812 | Down |
| ZC3H12A | 1155.1<br>74882 | 425.5067933 | 1884.842971 | 4.4296<br>42489 | 2.14719<br>0265      | 0.0207<br>77679 | 0.2646<br>21109 | Up   |
| ZCCHC24 | 1347.6<br>51604 | 1891.71397  | 803.5892388 | 0.4247<br>94261 | -<br>1.23516<br>3818 | 0.0048<br>16426 | 0.1108<br>4871  | Down |
| ZDBF2   | 14.878<br>00112 | 26.4430141  | 3.312988133 | 0.1252<br>87841 | -<br>2.99668<br>1691 | 0.0366<br>47348 | 0.3637<br>02678 | Down |
| ZDHHC2  | 951.26<br>32756 | 1490.658256 | 411.8682951 | 0.2762<br>9961  | -<br>1.85569<br>4568 | 0.0100<br>28663 | 0.1715<br>68276 | Down |
| ZEB1    | 1134.1<br>48521 | 1674.984239 | 593.3128031 | 0.3542<br>19932 | -<br>1.49728<br>27   | 0.0270<br>87348 | 0.3058<br>98299 | Down |
| ZEB2    | 157.00<br>49427 | 237.38844   | 76.62144528 | 0.3227<br>68224 | -<br>1.63142<br>9538 | 0.0111<br>05926 | 0.1839<br>02267 | Down |
| ZFHX3   | 665.08<br>97105 | 894.2061091 | 435.9733118 | 0.4875<br>53493 | -<br>1.03636<br>7579 | 0.0247<br>24116 | 0.2892<br>73763 | Down |
| ZFHX4   | 368.41<br>21544 | 650.3612143 | 86.46309448 | 0.1329<br>46265 | -<br>2.911084<br>846 | 0.0140<br>82592 | 0.2113<br>91694 | Down |
| ZFP36   | 2918.4<br>47209 | 4648.82515  | 1188.069268 | 0.2555<br>63337 | -<br>1.96824<br>7213 | 0.0385<br>94986 | 0.3737<br>49934 | Down |
| ZFPM2   | 253.29<br>06502 | 442.0672234 | 64.51407699 | 0.1459<br>37255 | -<br>2.77657<br>9875 | 0.0002<br>29745 | 0.0152<br>61155 | Down |
| ZFYVE19 | 205.01<br>64204 | 106.3734414 | 303.6593995 | 2.8546<br>54278 | 1.51331<br>6034      | 0.0049<br>81903 | 0.1128<br>4649  | Up   |
| ZIC2    | 8.2176<br>79208 | 15.16554494 | 1.26981348  | 0.0837<br>30158 | -<br>3.57810<br>8835 | 0.0208<br>24726 | 0.2648<br>11184 | Down |

|         |                 |             |             |                 |                      |                 |                 |      |
|---------|-----------------|-------------|-------------|-----------------|----------------------|-----------------|-----------------|------|
| ZMAT4   | 19.695<br>6308  | 1.722292782 | 37.66896882 | 21.871<br>40841 | 4.45097<br>422       | 0.0122<br>52774 | 0.1954<br>38959 | Up   |
| ZNF219  | 855.30<br>82029 | 1278.345532 | 432.2708743 | 0.3381<br>48696 | -<br>1.56427<br>0305 | 0.0078<br>09668 | 0.1453<br>84333 | Down |
| ZNF275  | 609.69<br>65424 | 824.6937488 | 394.699336  | 0.4786<br>01101 | -<br>1.06310<br>438  | 0.0239<br>7419  | 0.2857<br>04348 | Down |
| ZNF367  | 164.69<br>01575 | 234.6884518 | 94.69186324 | 0.4034<br>79006 | -<br>1.30943<br>4486 | 0.0216<br>2232  | 0.2692<br>75749 | Down |
| ZNF385A | 355.85<br>71116 | 541.9386028 | 169.7756205 | 0.3132<br>7464  | -<br>1.67450<br>011  | 0.0033<br>54703 | 0.0895<br>06851 | Down |
| ZNF385B | 9.6321<br>17678 | 17.56429068 | 1.699944677 | 0.0967<br>84135 | -<br>3.36908<br>5615 | 0.0298<br>14362 | 0.3225<br>94267 | Down |
| ZNF385D | 193.88<br>90667 | 367.2312871 | 20.54684629 | 0.0559<br>50697 | -<br>4.15970<br>0099 | 0.0002<br>47601 | 0.0159<br>02182 | Down |
| ZNF423  | 455.67<br>11683 | 652.9549076 | 258.3874289 | 0.3957<br>20173 | -<br>1.33744<br>7483 | 0.0048<br>59694 | 0.1114<br>69242 | Down |
| ZNF469  | 300.56<br>50334 | 432.7447872 | 168.3852796 | 0.3891<br>09897 | -<br>1.36175<br>0419 | 0.0224<br>89286 | 0.2754<br>93751 | Down |
| ZNF521  | 809.57<br>32101 | 1103.364751 | 515.7816687 | 0.4674<br>62521 | -<br>1.09707<br>7393 | 0.0170<br>94377 | 0.2370<br>14792 | Down |
| ZNF536  | 5.2814<br>37885 | 10.56287577 | 0           | 0               | #NAME<br>?           | 0.0259<br>66633 | 0.2979<br>9487  | Down |
| ZNF683  | 45.331<br>092   | 20.27965028 | 70.38253373 | 3.4705<br>98987 | 1.79518<br>4678      | 0.0112<br>78053 | 0.1856<br>64565 | Up   |
| ZP2     | 15.461<br>89672 | 25.76695713 | 5.156836324 | 0.2001<br>33694 | -<br>2.32096<br>4016 | 0.0378<br>66705 | 0.3702<br>86549 | Down |
| ZSCAN10 | 54.305<br>43715 | 6.604058001 | 102.0068163 | 15.446<br>08122 | 3.94916<br>8958      | 0.0115<br>98775 | 0.1889<br>31861 | Up   |
| ZSWIM4  | 557.31<br>78427 | 361.498906  | 753.1367794 | 2.0833<br>72223 | 1.05892<br>062       | 0.0297<br>08171 | 0.3218<br>40544 | Up   |
| ZYX     | 9535.7<br>60783 | 13935.99056 | 5135.531007 | 0.3685<br>08502 | -<br>1.44023<br>019  | 0.0355<br>50738 | 0.3573<br>55461 | Down |

**Table S6**

| id     | baseMean    | baseMean_control_Sample_non-lactation | baseMean_case_Sample_late-lactation | foldChange  | log2FoldChange | pval     | padj     | up_down |
|--------|-------------|---------------------------------------|-------------------------------------|-------------|----------------|----------|----------|---------|
| AAED1  | 678.0203377 | 929.8184919                           | 426.2221835                         | 0.458392888 | -1.125343435   | 0.001985 | 0.022165 | Down    |
| ABAT   | 238.0349038 | 103.9602124                           | 372.1095952                         | 3.579346239 | 1.839696106    | 6.53E-06 | 0.000208 | Up      |
| ABCA10 | 448.0740793 | 728.3161154                           | 167.8320433                         | 0.230438459 | -2.11754658    | 2.07E-06 | 7.60E-05 | Down    |
| ABCA2  | 2236.382412 | 1488.637046                           | 2984.127779                         | 2.004604002 | 1.003317268    | 0.003603 | 0.034761 | Up      |
| ABCA6  | 995.9763732 | 1602.652324                           | 389.3004227                         | 0.242910092 | -2.041505668   | 0.000116 | 0.00232  | Down    |
| ABCA9  | 670.977833  | 1025.401083                           | 316.5545826                         | 0.308712939 | -1.695662141   | 0.002146 | 0.023564 | Down    |
| ABCB11 | 21.40318608 | 2.394861652                           | 40.4115105                          | 16.8742568  | 4.076752057    | 0.000716 | 0.010152 | Up      |
| ABCC1  | 794.6971641 | 1074.809525                           | 514.5848036                         | 0.478768369 | -1.062600253   | 0.00327  | 0.032457 | Down    |
| ABCC11 | 422.3005789 | 16.74703672                           | 827.8541211                         | 49.43287192 | 5.627398821    | 0.000499 | 0.007709 | Up      |
| ABCC8  | 55.87705419 | 17.5390706                            | 94.21503779                         | 5.371723506 | 2.425385048    | 3.63E-05 | 0.000897 | Up      |
| ABCC9  | 1058.115303 | 1783.393394                           | 332.8372122                         | 0.186631404 | -2.421736333   | 4.60E-07 | 2.04E-05 | Down    |
| ABHD1  | 214.1668368 | 106.6379264                           | 321.6957473                         | 3.016710455 | 1.592976233    | 8.75E-05 | 0.001872 | Up      |
| ABHD12 | 3665.249899 | 2336.31848                            | 4994.181318                         | 2.13762865  | 1.096011249    | 0.001279 | 0.016002 | Up      |
| ABI3BP | 4372.58286  | 7455.459436                           | 1289.706284                         | 0.17298817  | -2.531254714   | 7.36E-05 | 0.001622 | Down    |
| ABL2   | 148.1527517 | 219.8571547                           | 76.44834881                         | 0.347718267 | -1.524009235   | 0.000501 | 0.007717 | Down    |
| ABLIM1 | 5269.7      | 7363.763365                           | 3175.710076                         | 0.4312      | -              | 0.00     | 0.00     | Down    |

|        |                 |             |             |                 |                      |              |              |          |
|--------|-----------------|-------------|-------------|-----------------|----------------------|--------------|--------------|----------|
|        | 3672            |             |             | 61832           | 1.213364<br>058      | 0378         | 6175         | n        |
| ABLIM3 | 1131.6<br>48208 | 1589.59177  | 673.7046457 | 0.4238<br>22429 | -<br>1.238468<br>155 | 0.04<br>0987 | 0.19<br>8559 | Dow<br>n |
| ABTB2  | 228.75<br>81676 | 138.258651  | 319.2576842 | 2.3091<br>33511 | 1.207351<br>59       | 0.00<br>2595 | 0.02<br>7239 | Up       |
| ACAP2  | 91.508<br>8023  | 130.1348461 | 52.88275849 | 0.4063<br>68932 | -<br>1.299137<br>985 | 0.00<br>8124 | 0.06<br>379  | Dow<br>n |
| ACE    | 553.52<br>45721 | 743.7248734 | 363.3242708 | 0.4885<br>19725 | -<br>1.033511<br>279 | 0.03<br>1928 | 0.16<br>8505 | Dow<br>n |
| ACER2  | 284.10<br>3215  | 453.2202202 | 114.9862097 | 0.2537<br>09355 | -<br>1.978751<br>378 | 0.00<br>2637 | 0.02<br>7529 | Dow<br>n |
| ACHE   | 46.913<br>2111  | 12.16008923 | 81.66633296 | 6.7159<br>32046 | 2.747587<br>633      | 1.76<br>E-05 | 0.00<br>048  | Up       |
| ACKR1  | 952.85<br>2641  | 1597.652896 | 308.0523859 | 0.1928<br>1559  | -<br>2.374706<br>389 | 0.00<br>1685 | 0.01<br>9606 | Dow<br>n |
| ACKR2  | 133.94<br>01624 | 219.0500166 | 48.83030813 | 0.2229<br>18532 | -<br>2.165411<br>537 | 0.00<br>0289 | 0.00<br>4925 | Dow<br>n |
| ACKR3  | 2706.5<br>57136 | 4945.219587 | 467.8946845 | 0.0946<br>15553 | -<br>3.401778<br>839 | 3.92<br>E-07 | 1.76<br>E-05 | Dow<br>n |
| ACKR4  | 366.29<br>89069 | 694.0741892 | 38.52362461 | 0.0555<br>03612 | -<br>4.171274<br>525 | 0.00<br>0211 | 0.00<br>3866 | Dow<br>n |
| ACOX3  | 1383.1<br>32279 | 813.3950841 | 1952.869474 | 2.4008<br>86743 | 1.263567<br>349      | 0.00<br>0286 | 0.00<br>4885 | Up       |
| ACP5   | 2402.1<br>40834 | 658.0995764 | 4146.182091 | 6.3002<br>35162 | 2.655405<br>679      | 0.00<br>1181 | 0.01<br>5031 | Up       |
| ACSBG1 | 91.008<br>34862 | 130.4811982 | 51.53549908 | 0.3949<br>64944 | -<br>1.340203<br>487 | 0.00<br>6141 | 0.05<br>1732 | Dow<br>n |
| ACSL4  | 2472.2<br>21453 | 3649.396772 | 1295.046135 | 0.3548<br>65808 | -<br>1.494654<br>52  | 2.02<br>E-05 | 0.00<br>0546 | Dow<br>n |
| ACSM1  | 572.78<br>78374 | 1085.875717 | 59.69995802 | 0.0549<br>78629 | -<br>4.184985<br>263 | 0.02<br>0766 | 0.12<br>5002 | Dow<br>n |
| ACSM3  | 268.49          | 23.71088048 | 513.271415  | 21.647          | 4.436100             | 1.37         | 1.70         | Up       |

|          |                 |             |             |                 |                      |              |              |      |
|----------|-----------------|-------------|-------------|-----------------|----------------------|--------------|--------------|------|
|          | 11477           |             |             | 08372           | 774                  | E-11         | E-09         |      |
| ACSM5    | 100.64<br>80158 | 47.89723304 | 153.3987985 | 3.2026<br>65139 | 1.679272<br>962      | 0.00<br>5725 | 0.04<br>9123 | Up   |
| ACTA2    | 85351.<br>24816 | 149350.1794 | 21352.31695 | 0.1429<br>68137 | -<br>2.806234<br>44  | 0.02<br>6315 | 0.14<br>7454 | Down |
| ACTG2    | 90956.<br>5339  | 177220.2254 | 4692.842393 | 0.0264<br>80287 | -<br>5.238937<br>443 | 0.00<br>7558 | 0.06<br>0579 | Down |
| ACTL8    | 13.188<br>82003 | 4.450996681 | 21.92664337 | 4.9262<br>32245 | 2.300484<br>645      | 0.03<br>1397 | 0.16<br>6475 | Up   |
| ACVR1B   | 1059.5<br>52743 | 688.1594091 | 1430.946077 | 2.0793<br>81692 | 1.056154<br>604      | 0.00<br>2949 | 0.03<br>0093 | Up   |
| ACVRL1   | 2027.3<br>81404 | 2716.328203 | 1338.434606 | 0.4927<br>36704 | -<br>1.021111<br>152 | 0.00<br>2904 | 0.02<br>97   | Down |
| ACY1     | 675.21<br>30217 | 362.4143287 | 988.0117147 | 2.7261<br>93852 | 1.446888<br>152      | 7.47<br>E-05 | 0.00<br>1639 | Up   |
| ADAM19   | 1841.5<br>30187 | 3050.575743 | 632.4846312 | 0.2073<br>32872 | -<br>2.269979<br>223 | 0.00<br>0444 | 0.00<br>7046 | Down |
| ADAM23   | 55.683<br>58374 | 89.18679988 | 22.18036759 | 0.2486<br>95632 | -<br>2.007546<br>924 | 0.00<br>302  | 0.03<br>0671 | Down |
| ADAM33   | 4004.2<br>20776 | 6365.683    | 1642.758552 | 0.2580<br>64775 | -<br>1.954194<br>863 | 0.00<br>8985 | 0.06<br>8777 | Down |
| ADAMTS1  | 4188.5<br>46479 | 7444.57522  | 932.5177368 | 0.1252<br>61376 | -<br>2.996986<br>461 | 0.02<br>9524 | 0.15<br>9589 | Down |
| ADAMTS12 | 347.66<br>11801 | 650.579017  | 44.74334324 | 0.0687<br>74649 | -<br>3.861979<br>328 | 2.63<br>E-12 | 3.53<br>E-10 | Down |
| ADAMTS14 | 91.151<br>29764 | 149.3804708 | 32.92212453 | 0.2203<br>91088 | -<br>2.181862<br>206 | 1.21<br>E-05 | 0.00<br>035  | Down |
| ADAMTS15 | 369.65<br>27981 | 596.7830841 | 142.5225121 | 0.2388<br>17949 | -<br>2.066016<br>825 | 7.54<br>E-06 | 0.00<br>0233 | Down |
| ADAMTS16 | 571.91<br>41414 | 1138.869403 | 4.958879995 | 0.0043<br>54213 | -<br>7.843372<br>291 | 0.00<br>3636 | 0.03<br>4987 | Down |
| ADAMTS17 | 1091.3<br>78647 | 1928.973611 | 253.7836827 | 0.1315<br>64103 | -<br>2.926162        | 0.02<br>0632 | 0.12<br>4361 | Down |

|              |                 |             |             |                 |                      |              |              |      |
|--------------|-----------------|-------------|-------------|-----------------|----------------------|--------------|--------------|------|
|              |                 |             |             |                 | 19                   |              |              |      |
| ADAMTS18     | 168.81<br>472   | 67.74959585 | 269.8798442 | 3.9834<br>90097 | 1.994032<br>989      | 0.02<br>184  | 0.12<br>9595 | Up   |
| ADAMTS2      | 6225.5<br>34648 | 11415.46792 | 1035.60138  | 0.0907<br>19135 | -<br>3.462449<br>299 | 0.00<br>2274 | 0.02<br>4629 | Down |
| ADAMTS3      | 115.46<br>74007 | 177.8458129 | 53.08898847 | 0.2985<br>11321 | -<br>1.744142<br>45  | 0.00<br>0143 | 0.00<br>2772 | Down |
| ADAMTS4      | 682.15<br>23611 | 1206.490133 | 157.8145894 | 0.1308<br>04708 | -<br>2.934513<br>628 | 3.34<br>E-07 | 1.52<br>E-05 | Down |
| ADAMTS5      | 386.71<br>61593 | 691.5158731 | 81.91644551 | 0.1184<br>59241 | -<br>3.077537<br>347 | 1.68<br>E-14 | 3.35<br>E-12 | Down |
| ADAMTS6      | 293.01<br>58529 | 456.892196  | 129.1395099 | 0.2826<br>4766  | -<br>1.822923<br>344 | 0.00<br>3638 | 0.03<br>4987 | Down |
| ADAMTSL<br>1 | 378.15<br>60674 | 716.987523  | 39.32461187 | 0.0548<br>46996 | -<br>4.188443<br>582 | 0.00<br>5062 | 0.04<br>5046 | Down |
| ADAMTSL<br>2 | 617.23<br>0884  | 902.4614572 | 332.0003107 | 0.3678<br>83091 | -<br>1.442680<br>726 | 0.02<br>3238 | 0.13<br>5357 | Down |
| ADAMTSL<br>5 | 2146.8<br>55648 | 2995.401743 | 1298.309554 | 0.4334<br>34199 | -<br>1.206115<br>106 | 0.00<br>9185 | 0.06<br>9537 | Down |
| ADARB1       | 1396.7<br>71783 | 2179.771923 | 613.7716426 | 0.2815<br>76084 | -<br>1.828403<br>292 | 6.88<br>E-05 | 0.00<br>1534 | Down |
| ADCY4        | 962.77<br>38397 | 1289.261943 | 636.2857369 | 0.4935<br>27123 | -<br>1.018798<br>722 | 0.00<br>3078 | 0.03<br>1064 | Down |
| ADCY5        | 554.53<br>52597 | 964.6524972 | 144.4180223 | 0.1497<br>09893 | -<br>2.739758<br>534 | 0.00<br>5137 | 0.04<br>5495 | Down |
| ADIG         | 46.929<br>00422 | 93.32655942 | 0.531449026 | 0.0056<br>9451  | -<br>7.456212<br>577 | 0.00<br>1185 | 0.01<br>5051 | Down |
| ADIPOQ       | 2939.7<br>39651 | 5765.10976  | 114.3695412 | 0.0198<br>38224 | -<br>5.655573<br>284 | 0.00<br>0933 | 0.01<br>2555 | Down |
| ADIPOR2      | 1615.1<br>09778 | 2197.493348 | 1032.726209 | 0.4699<br>56466 | -<br>1.089400        | 0.04<br>3897 | 0.20<br>8462 | Down |

|         |                 |             |             |                 |                      |              |              |          |
|---------|-----------------|-------------|-------------|-----------------|----------------------|--------------|--------------|----------|
|         |                 |             |             |                 | 973                  |              |              |          |
| ADM     | 7072.8<br>19185 | 13675.09457 | 470.5437984 | 0.0344<br>08815 | -<br>4.861077<br>984 | 0.01<br>2618 | 0.08<br>72   | Dow<br>n |
| ADORA2A | 92.219<br>81814 | 58.00489345 | 126.4347428 | 2.1797<br>25456 | 1.124146<br>434      | 0.01<br>8875 | 0.11<br>6833 | Up       |
| ADORA3  | 71.429<br>4605  | 36.83355489 | 106.0253661 | 2.8784<br>99413 | 1.525316<br>918      | 0.00<br>3326 | 0.03<br>2804 | Up       |
| ADRA1B  | 38.777<br>79958 | 65.21775456 | 12.33784461 | 0.1891<br>7923  | -<br>2.402174<br>389 | 0.03<br>6659 | 0.18<br>5025 | Dow<br>n |
| ADRA2A  | 134.68<br>11883 | 201.6537859 | 67.70859068 | 0.3357<br>66524 | -<br>1.574469<br>696 | 0.00<br>0347 | 0.00<br>5772 | Dow<br>n |
| ADRA2B  | 100.90<br>08668 | 141.3257244 | 60.47600915 | 0.4279<br>19329 | -<br>1.224589<br>249 | 0.01<br>2228 | 0.08<br>5189 | Dow<br>n |
| ADRB1   | 49.649<br>63199 | 84.97898147 | 14.3202825  | 0.1685<br>15582 | -<br>2.569046<br>098 | 0.04<br>0778 | 0.19<br>8052 | Dow<br>n |
| AEBP1   | 28460.<br>52309 | 40844.69134 | 16076.35483 | 0.3935<br>97168 | -<br>1.345208<br>255 | 0.00<br>8042 | 0.06<br>3323 | Dow<br>n |
| AFAP1L1 | 291.43<br>66954 | 391.0474785 | 191.8259123 | 0.4905<br>4379  | -<br>1.027546<br>165 | 0.00<br>6591 | 0.05<br>4426 | Dow<br>n |
| AGBL5   | 269.63<br>50494 | 163.7553542 | 375.5147446 | 2.2931<br>44834 | 1.197327<br>478      | 0.00<br>2695 | 0.02<br>8008 | Up       |
| AGMO    | 114.66<br>66935 | 199.2689337 | 30.06445326 | 0.1508<br>7376  | -<br>2.728586<br>182 | 1.17<br>E-08 | 7.77<br>E-07 | Dow<br>n |
| AGO2    | 252.48<br>09615 | 381.5343346 | 123.4275884 | 0.3235<br>03227 | -<br>1.628147<br>992 | 5.21<br>E-05 | 0.00<br>1211 | Dow<br>n |
| AGO3    | 60.899<br>7816  | 84.72138936 | 37.07817385 | 0.4376<br>48322 | -<br>1.192156<br>057 | 0.03<br>5073 | 0.18<br>0254 | Dow<br>n |
| AGRN    | 6164.5<br>58299 | 2612.611895 | 9716.504704 | 3.7190<br>7696  | 1.894944<br>602      | 7.27<br>E-08 | 3.85<br>E-06 | Up       |
| AGTR1   | 876.96<br>12837 | 1556.257292 | 197.6652751 | 0.1270<br>13236 | -<br>2.976949<br>245 | 0.00<br>3372 | 0.03<br>313  | Dow<br>n |
| AHSG    | 12.778<br>81486 | 2.372851528 | 23.1847782  | 9.7708<br>50776 | 3.288484<br>187      | 0.00<br>4593 | 0.04<br>1731 | Up       |



|          |                 |             |             |                 |                      |              |              |          |
|----------|-----------------|-------------|-------------|-----------------|----------------------|--------------|--------------|----------|
| AIDA     | 301.20<br>96143 | 424.8608875 | 177.5583411 | 0.4179<br>21127 | -<br>1.258697<br>401 | 0.00<br>1275 | 0.01<br>596  | Dow<br>n |
| AIF1     | 375.43<br>00475 | 226.1202048 | 524.7398901 | 2.3206<br>23628 | 1.214512<br>557      | 0.00<br>1136 | 0.01<br>4612 | Up       |
| AIF1L    | 1593.0<br>97086 | 2209.751792 | 976.44238   | 0.4418<br>78759 | -<br>1.178277<br>511 | 0.00<br>0613 | 0.00<br>8971 | Dow<br>n |
| AIFM3    | 46.499<br>48093 | 11.94889334 | 81.05006852 | 6.7830<br>60677 | 2.761936<br>398      | 1.35<br>E-05 | 0.00<br>0381 | Up       |
| AIM1L    | 191.10<br>09027 | 43.888204   | 338.3136014 | 7.7085<br>31465 | 2.946456<br>042      | 3.84<br>E-11 | 4.33<br>E-09 | Up       |
| AK1      | 477.28<br>42895 | 760.1549852 | 194.4135938 | 0.2557<br>55205 | -<br>1.967164<br>496 | 0.00<br>1297 | 0.01<br>6158 | Dow<br>n |
| AK4      | 656.52<br>56277 | 1021.819771 | 291.2314849 | 0.2850<br>12576 | -<br>1.810902<br>517 | 1.48<br>E-05 | 0.00<br>0411 | Dow<br>n |
| AK7      | 50.808<br>8358  | 30.95581142 | 70.66186019 | 2.2826<br>68647 | 1.190721<br>453      | 0.03<br>504  | 0.18<br>0163 | Up       |
| AKAP12   | 3041.2<br>06286 | 5371.086321 | 711.3262511 | 0.1324<br>36198 | -<br>2.916630<br>596 | 1.92<br>E-05 | 0.00<br>0518 | Dow<br>n |
| AKAP2    | 5131.2<br>22681 | 7411.865822 | 2850.579541 | 0.3845<br>96755 | -<br>1.378581<br>506 | 0.00<br>2166 | 0.02<br>3757 | Dow<br>n |
| AKAP8L   | 3492.6<br>80907 | 2205.905566 | 4779.456247 | 2.1666<br>64031 | 1.115475<br>462      | 0.00<br>1026 | 0.01<br>3512 | Up       |
| AKT3     | 2220.3<br>3661  | 3011.74556  | 1428.927659 | 0.4744<br>51653 | -<br>1.075667<br>013 | 0.00<br>1998 | 0.02<br>2252 | Dow<br>n |
| ALCAM    | 2318.1<br>37207 | 1372.344272 | 3263.930143 | 2.3783<br>61035 | 1.249967<br>732      | 0.00<br>0333 | 0.00<br>5575 | Up       |
| ALDH18A1 | 1517.6<br>75415 | 2064.111476 | 971.2393526 | 0.4705<br>36288 | -<br>1.087622<br>106 | 0.00<br>1577 | 0.01<br>8732 | Dow<br>n |
| ALDH1A2  | 8.3202<br>27389 | 15.05793362 | 1.58252116  | 0.1050<br>95506 | -<br>3.250227<br>109 | 0.01<br>7785 | 0.11<br>2033 | Dow<br>n |
| ALDH1L1  | 22.313<br>20407 | 44.37629559 | 0.250112546 | 0.0056<br>36175 | -<br>7.471068<br>003 | 0.04<br>5611 | 0.21<br>4524 | Dow<br>n |
| ALDH1L2  | 581.49<br>67532 | 1072.388111 | 90.60539584 | 0.0844<br>8937  | -<br>3.565086        | 5.37<br>E-09 | 3.96<br>E-07 | Dow<br>n |

|          |                 |             |             |                 |                      |              |              |      |
|----------|-----------------|-------------|-------------|-----------------|----------------------|--------------|--------------|------|
|          |                 |             |             |                 | 349                  |              |              |      |
| ALDH2    | 5163.9<br>57346 | 3415.483357 | 6912.431336 | 2.0238<br>51565 | 1.017103<br>482      | 0.00<br>3341 | 0.03<br>2898 | Up   |
| ALDOA    | 12965.<br>28324 | 17918.63847 | 8011.928017 | 0.4471<br>2817  | -<br>1.161239<br>655 | 0.00<br>0625 | 0.00<br>9111 | Down |
| ALOX12E  | 180.93<br>04606 | 17.0017676  | 344.8591536 | 20.283<br>72353 | 4.342250<br>611      | 1.10<br>E-18 | 4.33<br>E-16 | Up   |
| ALOX15B  | 1493.1<br>85848 | 174.6972152 | 2811.67448  | 16.094<br>5581  | 4.008501<br>061      | 1.12<br>E-18 | 4.33<br>E-16 | Up   |
| ALOX5    | 162.25<br>10537 | 95.32085555 | 229.1812518 | 2.4043<br>13836 | 1.265625<br>224      | 0.00<br>283  | 0.02<br>913  | Up   |
| ALOX5AP  | 100.81<br>76953 | 54.4664759  | 147.1689147 | 2.7020<br>09121 | 1.434032<br>545      | 0.00<br>2511 | 0.02<br>6536 | Up   |
| ALPK2    | 18.797<br>64317 | 31.33190338 | 6.263382951 | 0.1999<br>04324 | -<br>2.322618<br>42  | 0.01<br>6444 | 0.10<br>5792 | Down |
| ALPK3    | 1399.3<br>42797 | 2374.785787 | 423.8998062 | 0.1785<br>00229 | -<br>2.486002<br>172 | 0.01<br>1687 | 0.08<br>2496 | Down |
| ALS2CR11 | 9.0907<br>97506 | 1.197430826 | 16.98416419 | 14.183<br>83745 | 3.826176<br>002      | 0.00<br>7659 | 0.06<br>1113 | Up   |
| AMIGO3   | 1039.1<br>06646 | 1422.64446  | 655.5688321 | 0.4608<br>10027 | -<br>1.117755<br>985 | 0.01<br>3584 | 0.09<br>2399 | Down |
| AMOTL2   | 2909.6<br>78116 | 4416.461529 | 1402.894703 | 0.3176<br>5129  | -<br>1.654484<br>216 | 0.03<br>3684 | 0.17<br>4754 | Down |
| ANG      | 1129.2<br>25818 | 1560.697362 | 697.7542738 | 0.4470<br>78525 | -<br>1.161399<br>847 | 0.00<br>0965 | 0.01<br>2886 | Down |
| ANGPT2   | 1443.2<br>62291 | 2372.166962 | 514.3576209 | 0.2168<br>30278 | -<br>2.205361<br>87  | 9.53<br>E-10 | 8.61<br>E-08 | Down |
| ANGPT4   | 322.77<br>63758 | 477.9661661 | 167.5865855 | 0.3506<br>24369 | -<br>1.512001<br>824 | 0.00<br>2559 | 0.02<br>6933 | Down |
| ANGPTL2  | 4467.0<br>97771 | 6832.533165 | 2101.662376 | 0.3075<br>96367 | -<br>1.700889<br>633 | 0.01<br>6806 | 0.10<br>736  | Down |
| ANGPTL5  | 525.42<br>93648 | 1033.719088 | 17.13964171 | 0.0165<br>8056  | -<br>5.914363<br>426 | 0.00<br>8547 | 0.06<br>6028 | Down |
| ANK2     | 1934.4          | 3276.176647 | 592.7464854 | 0.1809          | -                    | 0.00         | 0.00         | Down |

|          |                 |             |             |                 |                      |              |              |          |
|----------|-----------------|-------------|-------------|-----------------|----------------------|--------------|--------------|----------|
|          | 61566           |             |             | 2629            | 2.466526<br>039      | 028          | 4816         | n        |
| ANKRD1   | 153.38<br>20641 | 298.6144924 | 8.149635811 | 0.0272<br>91495 | -<br>5.195404<br>784 | 0.02<br>324  | 0.13<br>5357 | Dow<br>n |
| ANKRD32  | 277.50<br>44442 | 175.2046405 | 379.8042479 | 2.1677<br>75048 | 1.116215<br>055      | 0.00<br>4315 | 0.03<br>9807 | Up       |
| ANKRD33  | 28.463<br>24974 | 45.33805696 | 11.58844251 | 0.2556<br>00775 | -<br>1.968035<br>882 | 0.03<br>3775 | 0.17<br>5094 | Dow<br>n |
| ANKRD33B | 101.02<br>50789 | 29.66872963 | 172.3814281 | 5.8102<br>05907 | 2.538589<br>292      | 5.78<br>E-05 | 0.00<br>1328 | Up       |
| ANKRD35  | 21.827<br>72681 | 32.79701519 | 10.85843844 | 0.3310<br>80081 | -<br>1.594747<br>88  | 0.04<br>2131 | 0.20<br>2405 | Dow<br>n |
| ANKRD50  | 1184.9<br>06754 | 1712.425414 | 657.388093  | 0.3838<br>92979 | -<br>1.381223<br>921 | 0.00<br>739  | 0.05<br>9441 | Dow<br>n |
| ANKRD63  | 12.190<br>72358 | 4.178300429 | 20.20314673 | 4.8352<br>54687 | 2.273591<br>883      | 0.03<br>637  | 0.18<br>403  | Up       |
| ANKRD65  | 33.813<br>99791 | 16.1700888  | 51.45790702 | 3.1822<br>897   | 1.670065<br>177      | 0.01<br>5413 | 0.10<br>0836 | Up       |
| ANKRD9   | 39.060<br>47558 | 60.6826366  | 17.43831455 | 0.2873<br>69098 | -<br>1.799023<br>163 | 0.00<br>4102 | 0.03<br>8111 | Dow<br>n |
| ANKS6    | 291.84<br>94753 | 396.0805099 | 187.6184407 | 0.4736<br>87637 | -<br>1.077992<br>077 | 0.03<br>5881 | 0.18<br>2351 | Dow<br>n |
| ANLN     | 372.73<br>12856 | 630.5475076 | 114.9150637 | 0.1822<br>4648  | -<br>2.456037<br>146 | 0.04<br>1795 | 0.20<br>127  | Dow<br>n |
| ANO6     | 3238.4<br>88449 | 4561.622622 | 1915.354276 | 0.4198<br>84422 | -<br>1.251935<br>832 | 0.00<br>1474 | 0.01<br>7851 | Dow<br>n |
| ANO9     | 1014.6<br>73098 | 385.2165864 | 1644.129609 | 4.2680<br>65465 | 2.093582<br>305      | 1.28<br>E-08 | 8.26<br>E-07 | Up       |
| ANTXR2   | 2368.2<br>52499 | 3857.255341 | 879.249657  | 0.2279<br>46967 | -<br>2.133229<br>88  | 0.00<br>9929 | 0.07<br>3455 | Dow<br>n |
| ANXA6    | 4623.5<br>17908 | 6266.273494 | 2980.762321 | 0.4756<br>83406 | -<br>1.071926<br>395 | 0.00<br>1937 | 0.02<br>1745 | Dow<br>n |
| ANXA9    | 9.1837<br>27952 | 2.372851528 | 15.99460438 | 6.7406<br>68004 | 2.752891<br>57       | 0.03<br>8102 | 0.18<br>9157 | Up       |

|          |                 |             |             |                 |                      |              |              |          |
|----------|-----------------|-------------|-------------|-----------------|----------------------|--------------|--------------|----------|
| AOC3     | 6226.2<br>77623 | 9323.259121 | 3129.296125 | 0.3356<br>44015 | -<br>1.574996<br>177 | 0.00<br>0289 | 0.00<br>4924 | Dow<br>n |
| AOX1     | 8093.9<br>20827 | 13791.5226  | 2396.319054 | 0.1737<br>53045 | -<br>2.524889<br>83  | 0.00<br>0157 | 0.00<br>3016 | Dow<br>n |
| AP1M2    | 928.47<br>99684 | 516.9825515 | 1339.977385 | 2.5919<br>19943 | 1.374021<br>158      | 0.04<br>8431 | 0.22<br>4075 | Up       |
| AP1S2    | 985.44<br>8864  | 1426.177674 | 544.7200542 | 0.3819<br>44034 | -<br>1.388566<br>838 | 0.00<br>9112 | 0.06<br>9303 | Dow<br>n |
| AP1S3    | 152.60<br>27175 | 92.55622628 | 212.6492087 | 2.2975<br>13817 | 1.200073<br>538      | 0.00<br>6446 | 0.05<br>3556 | Up       |
| AP3M2    | 161.12<br>98521 | 92.28209543 | 229.9776089 | 2.4921<br>15158 | 1.317370<br>735      | 0.00<br>2286 | 0.02<br>4735 | Up       |
| APBA1    | 502.69<br>75947 | 766.1962733 | 239.1989161 | 0.3121<br>90133 | -<br>1.679503<br>157 | 0.00<br>1612 | 0.01<br>8976 | Dow<br>n |
| APCDD1   | 1261.9<br>35985 | 780.4409679 | 1743.431003 | 2.2339<br>05029 | 1.159567<br>853      | 0.00<br>1319 | 0.01<br>6406 | Up       |
| APCDD1L  | 3.0028<br>79726 | 6.005759453 | 0           | 0               | #NAME?               | 0.04<br>5344 | 0.21<br>3602 | Dow<br>n |
| APOBEC3B | 155.16<br>64977 | 98.03163906 | 212.3013564 | 2.1656<br>412   | 1.114794<br>239      | 0.00<br>8486 | 0.06<br>5785 | Up       |
| APOE     | 22672.<br>91719 | 13676.13847 | 31669.6959  | 2.3156<br>89913 | 1.211442<br>079      | 0.00<br>0442 | 0.00<br>703  | Up       |
| APOL3    | 770.97<br>81974 | 394.5285448 | 1147.42785  | 2.9083<br>51918 | 1.540201<br>85       | 2.22<br>E-05 | 0.00<br>059  | Up       |
| APOLD1   | 1235.4<br>1886  | 2202.72158  | 268.1161398 | 0.1217<br>20395 | -<br>3.038357<br>179 | 4.11<br>E-16 | 1.11<br>E-13 | Dow<br>n |
| AQP7     | 192.30<br>88299 | 377.1043563 | 7.513303537 | 0.0199<br>23672 | -<br>5.649372<br>618 | 2.45<br>E-28 | 4.94<br>E-25 | Dow<br>n |
| AQPEP    | 493.95<br>23998 | 797.731559  | 190.1732407 | 0.2383<br>92525 | -<br>2.068589<br>095 | 0.03<br>6673 | 0.18<br>5045 | Dow<br>n |
| ARAP2    | 559.90<br>75545 | 350.4437638 | 769.3713453 | 2.1954<br>20278 | 1.134497<br>147      | 0.00<br>372  | 0.03<br>5606 | Up       |
| AREG     | 129.82<br>0053  | 10.30657533 | 249.3335307 | 24.191<br>69537 | 4.596439<br>973      | 7.25<br>E-18 | 2.44<br>E-15 | Up       |
| ARF4     | 2844.9<br>63826 | 4086.383465 | 1603.544188 | 0.3924<br>11579 | -<br>1.349560<br>483 | 9.86<br>E-05 | 0.00<br>2057 | Dow<br>n |

|          |                 |             |             |                 |                      |              |              |          |
|----------|-----------------|-------------|-------------|-----------------|----------------------|--------------|--------------|----------|
| ARFGAP3  | 2126.6<br>5967  | 2949.048368 | 1304.270972 | 0.4422<br>68423 | -<br>1.177005<br>853 | 0.00<br>0644 | 0.00<br>9325 | Dow<br>n |
| ARHGAP19 | 824.71<br>21769 | 511.3567802 | 1138.067574 | 2.2255<br>84206 | 1.154184<br>087      | 0.00<br>1332 | 0.01<br>6529 | Up       |
| ARHGAP21 | 2242.3<br>19284 | 3051.464367 | 1433.174202 | 0.4696<br>67684 | -<br>1.090287<br>765 | 0.00<br>1604 | 0.01<br>8919 | Dow<br>n |
| ARHGAP28 | 1469.8<br>65317 | 2254.840754 | 684.8898808 | 0.3037<br>42018 | -<br>1.719081<br>598 | 0.01<br>128  | 0.08<br>0434 | Dow<br>n |
| ARHGAP30 | 760.03<br>08917 | 492.6078689 | 1027.453914 | 2.0857<br>44015 | 1.060562<br>106      | 0.00<br>6108 | 0.05<br>1507 | Up       |
| ARHGAP36 | 39.329<br>51809 | 78.65903617 | 0           | 0               | #NAME?               | 0.03<br>296  | 0.17<br>2201 | Dow<br>n |
| ARHGAP39 | 517.08<br>86563 | 336.6999586 | 697.477354  | 2.0715<br>10068 | 1.050682<br>832      | 0.00<br>4609 | 0.04<br>1862 | Up       |
| ARHGAP42 | 1444.0<br>85378 | 810.038248  | 2078.132508 | 2.5654<br>74547 | 1.359225<br>712      | 0.00<br>2781 | 0.02<br>8736 | Up       |
| ARHGAP44 | 161.37<br>74016 | 227.9930647 | 94.76173856 | 0.4156<br>34303 | -<br>1.266613<br>367 | 0.01<br>8258 | 0.11<br>4195 | Dow<br>n |
| ARHGAP6  | 332.53<br>1826  | 523.6497639 | 141.4138881 | 0.2700<br>54334 | -<br>1.888678<br>395 | 0.02<br>4975 | 0.14<br>2215 | Dow<br>n |
| ARHGAP9  | 200.90<br>32746 | 109.9255111 | 291.881038  | 2.6552<br>62052 | 1.408854<br>25       | 0.00<br>0707 | 0.01<br>0072 | Up       |
| ARHGEF15 | 844.03<br>85855 | 1190.842734 | 497.2344369 | 0.4175<br>48365 | -<br>1.259984<br>778 | 0.00<br>0355 | 0.00<br>5862 | Dow<br>n |
| ARHGEF16 | 1617.4<br>73107 | 740.1846872 | 2494.761526 | 3.3704<br>5817  | 1.752944<br>72       | 0.00<br>1106 | 0.01<br>431  | Up       |
| ARHGEF19 | 744.48<br>25351 | 266.6421733 | 1222.322897 | 4.5841<br>31917 | 2.196648<br>561      | 5.22<br>E-09 | 3.86<br>E-07 | Up       |
| ARHGEF25 | 2196.9<br>24921 | 3027.616745 | 1366.233098 | 0.4512<br>5695  | -<br>1.147978<br>944 | 0.03<br>3196 | 0.17<br>3135 | Dow<br>n |
| ARHGEF26 | 620.01<br>06019 | 859.5398441 | 380.4813596 | 0.4426<br>57036 | -<br>1.175738<br>742 | 0.00<br>1066 | 0.01<br>3907 | Dow<br>n |
| ARHGEF28 | 1310.3<br>11395 | 423.1959397 | 2197.426851 | 5.1924<br>57311 | 2.376417<br>45       | 6.86<br>E-11 | 7.28<br>E-09 | Up       |
| ARHGEF39 | 438.56<br>62732 | 276.687179  | 600.4453674 | 2.1701<br>23566 | 1.117777<br>191      | 0.00<br>3395 | 0.03<br>3302 | Up       |

|         |                 |             |             |                 |                      |              |              |      |
|---------|-----------------|-------------|-------------|-----------------|----------------------|--------------|--------------|------|
| ARHGEF4 | 131.56<br>07528 | 72.51080882 | 190.6106968 | 2.6287<br>21151 | 1.394361<br>112      | 0.00<br>2139 | 0.02<br>3534 | Up   |
| ARHGEF5 | 911.71<br>16527 | 534.0026239 | 1289.420681 | 2.4146<br>33606 | 1.271804<br>293      | 0.01<br>4181 | 0.09<br>5404 | Up   |
| ARL15   | 287.85<br>13534 | 408.0572021 | 167.6455047 | 0.4108<br>38245 | -<br>1.283357<br>607 | 0.00<br>089  | 0.01<br>2057 | Down |
| ARMC4   | 46.746<br>34753 | 78.04800218 | 15.44469288 | 0.1978<br>87101 | -<br>2.337250<br>521 | 0.01<br>5504 | 0.10<br>1212 | Down |
| ARSE    | 1389.6<br>67791 | 346.7270652 | 2432.608518 | 7.0159<br>17596 | 2.810631<br>803      | 3.45<br>E-14 | 6.45<br>E-12 | Up   |
| ARSJ    | 361.53<br>03664 | 624.3544242 | 98.70630847 | 0.1580<br>93392 | -<br>2.661151<br>032 | 0.02<br>2551 | 0.13<br>2542 | Down |
| ASAP1   | 915.98<br>85551 | 1236.453254 | 595.5238561 | 0.4816<br>38796 | -<br>1.053976<br>49  | 0.00<br>3119 | 0.03<br>1428 | Down |
| ASB1    | 99.140<br>04948 | 140.0365098 | 58.24358921 | 0.4159<br>17173 | -<br>1.265631<br>842 | 0.00<br>7761 | 0.06<br>1667 | Down |
| ASIC2   | 14.787<br>32733 | 23.76119591 | 5.813458737 | 0.2446<br>61875 | -<br>2.031138<br>789 | 0.02<br>8715 | 0.15<br>6504 | Down |
| ASIC3   | 1012.0<br>29898 | 41.21013028 | 1982.849665 | 48.115<br>58837 | 5.588432<br>465      | 3.39<br>E-38 | 3.08<br>E-34 | Up   |
| ASPH    | 2651.8<br>17686 | 3661.21334  | 1642.422031 | 0.4486<br>00472 | -<br>1.156496<br>958 | 0.00<br>0856 | 0.01<br>1709 | Down |
| ASPHD2  | 251.77<br>79372 | 400.6377052 | 102.9181691 | 0.2568<br>85879 | -<br>1.960800<br>507 | 0.00<br>0809 | 0.01<br>1251 | Down |
| ASPN    | 8856.5<br>23936 | 15986.04142 | 1727.006452 | 0.1080<br>32152 | -<br>3.210467<br>355 | 0.00<br>4993 | 0.04<br>4593 | Down |
| ASRGL1  | 738.54<br>26401 | 480.5216025 | 996.5636777 | 2.0739<br>20657 | 1.052360<br>702      | 0.00<br>314  | 0.03<br>1546 | Up   |
| ASTN1   | 37.388<br>4078  | 74.50730504 | 0.269510562 | 0.0036<br>17237 | -<br>8.110896<br>26  | 0.00<br>4943 | 0.04<br>4255 | Down |
| ASTN2   | 30.684<br>64223 | 13.82830742 | 47.54097704 | 3.4379<br>46206 | 1.781546<br>971      | 0.01<br>2448 | 0.08<br>6328 | Up   |
| ATF5    | 1066.8<br>96529 | 1508.080954 | 625.7121035 | 0.4149<br>06177 | -<br>1.269142        | 0.00<br>0296 | 0.00<br>5031 | Down |

|          |                 |             |             |                 |                      |              |              |          |
|----------|-----------------|-------------|-------------|-----------------|----------------------|--------------|--------------|----------|
|          |                 |             |             |                 | 959                  |              |              |          |
| ATG4A    | 230.86<br>41881 | 350.0002662 | 111.7281101 | 0.3192<br>22929 | -<br>1.647363<br>815 | 5.23<br>E-05 | 0.00<br>1214 | Dow<br>n |
| ATG9B    | 320.99<br>29259 | 95.13674337 | 546.8491085 | 5.7480<br>32665 | 2.523068<br>26       | 6.10<br>E-10 | 5.53<br>E-08 | Up       |
| ATL3     | 1823.2<br>91278 | 2471.996958 | 1174.585597 | 0.4751<br>56571 | -<br>1.073525<br>115 | 0.00<br>2137 | 0.02<br>3532 | Dow<br>n |
| ATP10A   | 359.33<br>28813 | 566.9431295 | 151.7226332 | 0.2676<br>1526  | -<br>1.901767<br>709 | 0.00<br>2167 | 0.02<br>376  | Dow<br>n |
| ATP10B   | 34.436<br>48671 | 4.006109502 | 64.86686392 | 16.191<br>98474 | 4.017207<br>93       | 2.92<br>E-07 | 1.34<br>E-05 | Up       |
| ATP13A3  | 3507.7<br>0847  | 5559.025965 | 1456.390975 | 0.2619<br>86719 | -<br>1.932434<br>415 | 3.24<br>E-05 | 0.00<br>081  | Dow<br>n |
| ATP2A2   | 3486.3<br>42324 | 4652.210298 | 2320.474351 | 0.4987<br>89651 | -<br>1.003496<br>563 | 0.00<br>3852 | 0.03<br>6387 | Dow<br>n |
| ATP2B2   | 43.441<br>95515 | 24.83498608 | 62.04892422 | 2.4984<br>48118 | 1.321032<br>26       | 0.03<br>2413 | 0.16<br>9926 | Up       |
| ATP2B4   | 1452.8<br>78825 | 2248.920008 | 656.8376422 | 0.2920<br>68033 | -<br>1.775623<br>634 | 0.00<br>4354 | 0.04<br>0042 | Dow<br>n |
| ATP4A    | 15.580<br>12765 | 4.723692933 | 26.43656237 | 5.5965<br>87827 | 2.484547<br>501      | 0.01<br>3098 | 0.08<br>9769 | Up       |
| ATP6V0A4 | 68.221<br>38753 | 27.5611248  | 108.8816503 | 3.9505<br>51767 | 1.982054<br>166      | 0.00<br>021  | 0.00<br>3863 | Up       |
| ATP6V0D2 | 48.841<br>30577 | 2.540512439 | 95.14209911 | 37.449<br>96388 | 5.226892<br>422      | 0.00<br>0627 | 0.00<br>9131 | Up       |
| ATP6V1B1 | 114.08<br>1966  | 7.149624739 | 221.0143073 | 30.912<br>71436 | 4.950128<br>434      | 3.76<br>E-18 | 1.39<br>E-15 | Up       |
| ATP6V1C2 | 1532.4<br>58313 | 466.6213734 | 2598.295252 | 5.5683<br>15985 | 2.477241<br>082      | 2.16<br>E-11 | 2.56<br>E-09 | Up       |
| ATP8A1   | 146.29<br>57117 | 93.08270408 | 199.5087193 | 2.1433<br>48985 | 1.099866<br>772      | 0.01<br>2201 | 0.08<br>5064 | Up       |
| ATP8A2   | 183.67<br>24088 | 13.03174353 | 354.3130741 | 27.188<br>4628  | 4.764922<br>68       | 2.29<br>E-21 | 1.43<br>E-18 | Up       |
| ATP8B1   | 1223.2<br>98625 | 1725.955832 | 720.6414175 | 0.4175<br>31784 | -<br>1.260042<br>07  | 0.00<br>0859 | 0.01<br>1733 | Dow<br>n |
| ATXN1    | 460.67<br>81824 | 643.7996574 | 277.5567074 | 0.4311<br>22794 | -<br>1.213829        | 0.01<br>5752 | 0.10<br>2499 | Dow<br>n |

|          |                 |             |             |                 |                      |              |              |          |
|----------|-----------------|-------------|-------------|-----------------|----------------------|--------------|--------------|----------|
|          |                 |             |             |                 | 252                  |              |              |          |
| AUNIP    | 21.863<br>55814 | 36.1119267  | 7.615189581 | 0.2108<br>7741  | -<br>2.245523<br>537 | 0.00<br>6678 | 0.05<br>4934 | Dow<br>n |
| AVPI1    | 563.15<br>71841 | 794.7764143 | 331.537954  | 0.4171<br>46191 | -<br>1.261375<br>023 | 0.01<br>364  | 0.09<br>2642 | Dow<br>n |
| AZGP1    | 4584.1<br>75764 | 2328.710732 | 6839.640796 | 2.9370<br>93347 | 1.554389<br>118      | 0.00<br>7989 | 0.06<br>3003 | Up       |
| AZIN2    | 35.089<br>46006 | 17.46413489 | 52.71478523 | 3.0184<br>59579 | 1.593812<br>482      | 0.02<br>1332 | 0.12<br>7396 | Up       |
| B3GNT9   | 558.33<br>14302 | 858.31267   | 258.3501904 | 0.3009<br>97759 | -<br>1.732175<br>348 | 0.00<br>1603 | 0.01<br>8919 | Dow<br>n |
| B4GALNT4 | 244.04<br>30165 | 118.0659591 | 370.020074  | 3.1340<br>11505 | 1.648010<br>476      | 0.00<br>2043 | 0.02<br>2669 | Up       |
| B4GALT3  | 1014.2<br>21965 | 634.8816505 | 1393.56228  | 2.1949<br>95365 | 1.134217<br>893      | 0.00<br>1641 | 0.01<br>9207 | Up       |
| BAG2     | 1306.4<br>3093  | 2208.398028 | 404.4638313 | 0.1831<br>48068 | -<br>2.448917<br>616 | 0.04<br>1364 | 0.19<br>9724 | Dow<br>n |
| BAG3     | 1608.2<br>43244 | 2296.211431 | 920.2750571 | 0.4007<br>79756 | -<br>1.319118<br>457 | 0.00<br>6866 | 0.05<br>6121 | Dow<br>n |
| BAI1     | 15.475<br>41016 | 28.28600309 | 2.664817228 | 0.0942<br>09748 | -<br>3.407979<br>842 | 0.00<br>1807 | 0.02<br>0687 | Dow<br>n |
| BAIAP2L1 | 415.51<br>04072 | 172.1275313 | 658.8932831 | 3.8279<br>36637 | 1.936566<br>949      | 0.00<br>017  | 0.00<br>3216 | Up       |
| BAIAP3   | 42.148<br>72409 | 16.17914883 | 68.11829935 | 4.2102<br>52349 | 2.073906<br>706      | 0.00<br>1269 | 0.01<br>5914 | Up       |
| BARX1    | 101.89<br>22473 | 184.1473668 | 19.63712783 | 0.1066<br>38114 | -<br>3.229204<br>93  | 0.00<br>1579 | 0.01<br>8735 | Dow<br>n |
| BARX2    | 957.54<br>46973 | 238.8609976 | 1676.228397 | 7.0175<br>89368 | 2.810975<br>531      | 1.39<br>E-13 | 2.42<br>E-11 | Up       |
| BATF2    | 222.75<br>36194 | 148.1377981 | 297.3694406 | 2.0073<br>83966 | 1.005316<br>597      | 0.01<br>3517 | 0.09<br>2011 | Up       |
| BBC3     | 176.45<br>31828 | 83.96285991 | 268.9435057 | 3.2031<br>24643 | 1.679479<br>939      | 7.52<br>E-05 | 0.00<br>1642 | Up       |
| BCHE     | 491.97<br>29138 | 843.3666363 | 140.5791913 | 0.1666<br>88111 | -<br>2.584776<br>889 | 0.02<br>2998 | 0.13<br>4425 | Dow<br>n |
| BCL11A   | 114.32          | 47.27286007 | 181.3697733 | 3.8366          | 1.939849             | 5.53         | 0.00         | Up       |



|         |                 |             |             |                 |                      |              |              |      |
|---------|-----------------|-------------|-------------|-----------------|----------------------|--------------|--------------|------|
|         | 13167           |             |             | 57504           | 982                  | E-05         | 1278         |      |
| BCL11B  | 91.898<br>90554 | 59.15794431 | 124.6398668 | 2.1068<br>99897 | 1.075121<br>771      | 0.02<br>1953 | 0.12<br>9949 | Up   |
| BCL2A1  | 89.216<br>37314 | 35.7681848  | 142.6645615 | 3.9885<br>88245 | 1.995878<br>197      | 0.00<br>0381 | 0.00<br>6205 | Up   |
| BCL2L14 | 42.579<br>75127 | 7.629472134 | 77.5300304  | 10.161<br>91278 | 3.345100<br>082      | 1.13<br>E-06 | 4.48<br>E-05 | Up   |
| BCL6B   | 1104.3<br>26682 | 1473.695056 | 734.9583066 | 0.4987<br>18038 | -<br>1.003703<br>712 | 0.00<br>4018 | 0.03<br>7521 | Down |
| BEGAIN  | 145.58<br>42001 | 226.5835426 | 64.58485762 | 0.2850<br>37726 | -<br>1.810775<br>218 | 3.77<br>E-05 | 0.00<br>092  | Down |
| BEX2    | 494.72<br>70117 | 273.3295854 | 716.1244381 | 2.6200<br>03382 | 1.389568<br>674      | 0.00<br>1271 | 0.01<br>5925 | Up   |
| BEX5    | 199.14<br>89544 | 44.3761409  | 353.9217679 | 7.9754<br>96757 | 2.995574<br>381      | 2.07<br>E-11 | 2.47<br>E-09 | Up   |
| BGLAP   | 29.813<br>89988 | 43.5376525  | 16.09014727 | 0.3695<br>68554 | -<br>1.436086<br>09  | 0.03<br>5711 | 0.18<br>1835 | Down |
| BHLHE41 | 983.10<br>16956 | 409.596501  | 1556.60689  | 3.8003<br>42254 | 1.926129<br>352      | 8.77<br>E-08 | 4.54<br>E-06 | Up   |
| BHMT2   | 189.09<br>8965  | 26.52861919 | 351.6693109 | 13.256<br>22372 | 3.728597<br>95       | 6.41<br>E-08 | 3.44<br>E-06 | Up   |
| BIK     | 67.890<br>8971  | 37.29528222 | 98.48651198 | 2.6407<br>23065 | 1.400933<br>013      | 0.00<br>7736 | 0.06<br>1528 | Up   |
| BIN2    | 417.81<br>7462  | 248.9584022 | 586.6765219 | 2.3565<br>2429  | 1.236660<br>552      | 0.00<br>076  | 0.01<br>0668 | Up   |
| BLA-DQB | 3246.4<br>43341 | 1680.716053 | 4812.170629 | 2.8631<br>66934 | 1.517611<br>788      | 0.00<br>7125 | 0.05<br>7583 | Up   |
| BLNK    | 176.26<br>30509 | 66.07439218 | 286.4517097 | 4.3352<br>90878 | 2.116128<br>795      | 1.12<br>E-06 | 4.45<br>E-05 | Up   |
| BMF     | 1086.8<br>62378 | 694.6657842 | 1479.058972 | 2.1291<br>66292 | 1.090288<br>632      | 0.00<br>1793 | 0.02<br>0558 | Up   |
| BMP1    | 2400.3<br>46415 | 3463.883051 | 1336.809778 | 0.3859<br>28092 | -<br>1.373596<br>031 | 7.85<br>E-05 | 0.00<br>1704 | Down |
| BMP4    | 819.71<br>45385 | 1330.113823 | 309.3152538 | 0.2325<br>47958 | -<br>2.104399<br>822 | 0.00<br>042  | 0.00<br>6693 | Down |
| BMP5    | 73.349<br>47967 | 133.0050543 | 13.69390506 | 0.1029<br>5778  | -<br>3.279875<br>25  | 2.54<br>E-09 | 1.99<br>E-07 | Down |
| BMPER   | 80.913          | 123.3935087 | 38.43359216 | 0.3114          | -                    | 0.01         | 0.11         | Down |

|               |                 |             |             |                 |                      |              |              |          |
|---------------|-----------------|-------------|-------------|-----------------|----------------------|--------------|--------------|----------|
|               | 55043           |             |             | 71751           | 1.682826<br>773      | 9054         | 7659         | n        |
| BMX           | 137.96<br>26203 | 215.460443  | 60.4647977  | 0.2806<br>3062  | -<br>1.833255<br>663 | 0.00<br>2306 | 0.02<br>4875 | Dow<br>n |
| BNC2          | 1162.5<br>23556 | 2030.324457 | 294.7226541 | 0.1451<br>60372 | -<br>2.784280<br>432 | 0.00<br>5416 | 0.04<br>7171 | Dow<br>n |
| BNIP2         | 426.39<br>78366 | 624.8968502 | 227.898823  | 0.3646<br>98307 | -<br>1.455224<br>594 | 0.00<br>0124 | 0.00<br>2456 | Dow<br>n |
| BNIP3         | 868.46<br>29281 | 1288.129867 | 448.7959894 | 0.3484<br>08962 | -<br>1.521146<br>362 | 0.04<br>9256 | 0.22<br>5939 | Dow<br>n |
| BNIPL         | 563.20<br>80279 | 260.7417877 | 865.6742681 | 3.3200<br>44231 | 1.731202<br>462      | 0.00<br>0789 | 0.01<br>1022 | Up       |
| BOC           | 3108.0<br>05407 | 1978.811851 | 4237.198962 | 2.1412<br>84407 | 1.098476<br>428      | 0.00<br>1795 | 0.02<br>0579 | Up       |
| BOLA3         | 180.25<br>61477 | 246.8244914 | 113.687804  | 0.4606<br>01796 | -<br>1.118408<br>058 | 0.00<br>7049 | 0.05<br>7205 | Dow<br>n |
| BOLA-<br>DMA  | 917.92<br>25435 | 484.3014702 | 1351.543617 | 2.7907<br>07235 | 1.480630<br>783      | 3.12<br>E-05 | 0.00<br>0785 | Up       |
| BOLA-<br>DMB  | 1937.9<br>33832 | 984.7200162 | 2891.147647 | 2.9360<br>09829 | 1.553856<br>798      | 7.49<br>E-06 | 0.00<br>0232 | Up       |
| BOLA-DOA      | 147.42<br>85532 | 64.3451589  | 230.5119475 | 3.5824<br>28756 | 1.840938<br>014      | 3.21<br>E-05 | 0.00<br>0803 | Up       |
| BOLA-DOB      | 124.05<br>43086 | 78.09670713 | 170.0119101 | 2.1769<br>40826 | 1.122302<br>192      | 0.00<br>9677 | 0.07<br>2268 | Up       |
| BOLA-DRA      | 12895.<br>79075 | 7088.470286 | 18703.11122 | 2.6385<br>25728 | 1.399732<br>051      | 7.50<br>E-05 | 0.00<br>1642 | Up       |
| BOLA-<br>DRB2 | 184.68<br>08226 | 82.63191256 | 286.7297326 | 3.4699<br>63647 | 1.794920<br>548      | 3.12<br>E-05 | 0.00<br>0785 | Up       |
| BOLA-<br>DRB3 | 3660.8<br>10657 | 1796.858114 | 5524.763201 | 3.0746<br>7972  | 1.620436<br>137      | 0.00<br>0706 | 0.01<br>0063 | Up       |
| BOLA-DYA      | 36.006<br>45725 | 14.61143596 | 57.40147853 | 3.9285<br>30959 | 1.973989<br>93       | 0.00<br>5165 | 0.04<br>5584 | Up       |
| BPI           | 98.891<br>74169 | 63.02216755 | 134.7613158 | 2.1383<br>16105 | 1.096475<br>141      | 0.02<br>3092 | 0.13<br>4848 | Up       |
| BPIFA1        | 16.832<br>81831 | 0.391806901 | 33.27382972 | 84.924<br>05227 | 6.408101<br>308      | 0.00<br>0141 | 0.00<br>2739 | Up       |
| BPIFA2A       | 9.5580<br>26387 | 18.05740854 | 1.058644231 | 0.0586<br>26587 | -<br>4.092301<br>121 | 0.03<br>9293 | 0.19<br>3574 | Dow<br>n |

|                  |                 |             |             |                 |                      |              |              |      |
|------------------|-----------------|-------------|-------------|-----------------|----------------------|--------------|--------------|------|
| BPIFB1           | 73.897<br>18274 | 10.40708066 | 137.3872848 | 13.201<br>32796 | 3.722611<br>156      | 0.00<br>4192 | 0.03<br>887  | Up   |
| BRB              | 1567.7<br>503   | 872.7853019 | 2262.715298 | 2.5925<br>22231 | 1.374356<br>36       | 6.49<br>E-05 | 0.00<br>1467 | Up   |
| BRI3BP           | 581.35<br>23394 | 368.255162  | 794.4495167 | 2.1573<br>34366 | 1.109249<br>798      | 0.04<br>3232 | 0.20<br>6323 | Up   |
| BRINP1           | 34.856<br>6057  | 5.758478125 | 63.95473328 | 11.106<br>18672 | 3.473291<br>651      | 0.00<br>1929 | 0.02<br>1687 | Up   |
| BRINP2           | 32.273<br>9382  | 64.54787641 | 0           | 0               | #NAME?               | 0.00<br>5703 | 0.04<br>8973 | Down |
| BRSK1            | 201.88<br>13378 | 130.2901217 | 273.4725539 | 2.0989<br>5079  | 1.069668<br>343      | 0.00<br>9226 | 0.06<br>979  | Up   |
| BSN              | 72.716<br>63474 | 39.39607745 | 106.037192  | 2.6915<br>67255 | 1.428446<br>475      | 0.00<br>5461 | 0.04<br>7388 | Up   |
| BSP5             | 611.23<br>90997 | 81.1654165  | 1141.312783 | 14.061<br>56504 | 3.813685<br>269      | 1.23<br>E-05 | 0.00<br>0352 | Up   |
| BTBD10           | 569.23<br>25273 | 793.8320959 | 344.6329586 | 0.4341<br>38353 | -<br>1.203773<br>215 | 0.04<br>3918 | 0.20<br>8505 | Down |
| BTBD19           | 266.22<br>0086  | 401.9287354 | 130.5114365 | 0.3247<br>12878 | -<br>1.622763<br>491 | 0.00<br>1858 | 0.02<br>1137 | Down |
| BTC              | 288.56<br>72994 | 88.30240053 | 488.8321982 | 5.5358<br>87986 | 2.468814<br>752      | 1.89<br>E-09 | 1.56<br>E-07 | Up   |
| BTK              | 166.75<br>31027 | 107.133129  | 226.3730764 | 2.1130<br>07233 | 1.079297<br>706      | 0.00<br>8674 | 0.06<br>6784 | Up   |
| BVES             | 256.09<br>02948 | 480.3153688 | 31.86522089 | 0.0663<br>42289 | -<br>3.913927<br>405 | 0.00<br>6211 | 0.05<br>2127 | Down |
| C10H14orf3<br>7  | 410.16<br>49921 | 71.73965984 | 748.5903244 | 10.434<br>81843 | 3.383333<br>592      | 3.72<br>E-05 | 0.00<br>0911 | Up   |
| C10H15orf4<br>8  | 1446.2<br>75868 | 273.4456599 | 2619.106076 | 9.5781<br>59246 | 3.259748<br>422      | 3.07<br>E-18 | 1.16<br>E-15 | Up   |
| C10H15orf5<br>2  | 1726.2<br>14991 | 2706.288128 | 746.141855  | 0.2757<br>06732 | -<br>1.858793<br>602 | 0.02<br>2145 | 0.13<br>0721 | Down |
| C11H2orf40       | 119.83<br>09236 | 197.9790118 | 41.68283542 | 0.2105<br>41688 | -<br>2.247822<br>172 | 0.00<br>1184 | 0.01<br>5051 | Down |
| C13H20orf1<br>94 | 1219.9<br>09131 | 1730.158569 | 709.6596934 | 0.4101<br>7032  | -<br>1.285704<br>994 | 0.04<br>0604 | 0.19<br>7685 | Down |
| C14H8orf22       | 16.814<br>0187  | 27.4392493  | 6.188788092 | 0.2255<br>45095 | -<br>2.148512        | 0.01<br>9314 | 0.11<br>8543 | Down |

|                 |                 |             |             |                 |                      |              |              |          |
|-----------------|-----------------|-------------|-------------|-----------------|----------------------|--------------|--------------|----------|
|                 |                 |             |             |                 | 183                  |              |              |          |
| C14H8orf88      | 11.404<br>96856 | 20.65717091 | 2.152766218 | 0.1042<br>13991 | -<br>3.262379<br>122 | 0.00<br>4678 | 0.04<br>2316 | Dow<br>n |
| C15H11orf3<br>4 | 463.67<br>0122  | 44.08483932 | 883.2554046 | 20.035<br>35497 | 4.324476<br>165      | 3.28<br>E-17 | 9.75<br>E-15 | Up       |
| C15H11orf5<br>2 | 146.13<br>99807 | 42.12288528 | 250.1570761 | 5.9387<br>45041 | 2.570158<br>097      | 2.68<br>E-08 | 1.58<br>E-06 | Up       |
| C15H11orf7<br>0 | 55.266<br>22238 | 78.00237145 | 32.5300733  | 0.4170<br>39542 | -<br>1.261743<br>913 | 0.04<br>3448 | 0.20<br>6923 | Dow<br>n |
| C16H1orf10<br>6 | 35.246<br>08018 | 14.06151344 | 56.43064692 | 4.0131<br>27545 | 2.004727<br>008      | 0.00<br>3897 | 0.03<br>6681 | Up       |
| C16H1orf11<br>6 | 587.62<br>30236 | 151.7869142 | 1023.459133 | 6.7427<br>36279 | 2.753334<br>172      | 1.35<br>E-12 | 1.96<br>E-10 | Up       |
| C16H1orf16<br>7 | 21.976<br>91775 | 10.56632149 | 33.38751402 | 3.1598<br>04862 | 1.659835<br>465      | 0.04<br>1584 | 0.20<br>0574 | Up       |
| C17H4orf29      | 546.67<br>6189  | 730.2953196 | 363.0570584 | 0.4971<br>37321 | -<br>1.008283<br>683 | 0.00<br>5143 | 0.04<br>5529 | Dow<br>n |
| C18H19orf3<br>3 | 229.40<br>07566 | 80.1841465  | 378.6173667 | 4.7218<br>48186 | 2.239351<br>658      | 8.10<br>E-08 | 4.22<br>E-06 | Up       |
| C18H19orf8<br>4 | 37.811<br>57179 | 56.22823512 | 19.39490845 | 0.3449<br>31837 | -<br>1.535616<br>799 | 0.01<br>5395 | 0.10<br>0793 | Dow<br>n |
| C1GALT1         | 288.77<br>82333 | 406.1817242 | 171.3747424 | 0.4219<br>16428 | -<br>1.244970<br>831 | 0.00<br>1316 | 0.01<br>637  | Dow<br>n |
| C1H3orf52       | 33.815<br>72486 | 4.723692933 | 62.90775679 | 13.317<br>49495 | 3.735250<br>829      | 1.52<br>E-06 | 5.86<br>E-05 | Up       |
| C1H3orf70       | 72.909<br>8416  | 102.8009627 | 43.01872049 | 0.4184<br>66125 | -<br>1.256817<br>255 | 0.01<br>4713 | 0.09<br>7949 | Dow<br>n |
| C1QTNF1         | 4050.0<br>79397 | 7158.221141 | 941.9376529 | 0.1315<br>8823  | -<br>2.925897<br>638 | 1.27<br>E-08 | 8.26<br>E-07 | Dow<br>n |
| C1QTNF3         | 2489.2<br>79164 | 4866.92932  | 111.6290077 | 0.0229<br>36229 | -<br>5.446227<br>946 | 3.08<br>E-05 | 0.00<br>0778 | Dow<br>n |
| C1QTNF6         | 686.91<br>01339 | 957.266354  | 416.5539137 | 0.4351<br>49436 | -<br>1.200417<br>17  | 0.02<br>4809 | 0.14<br>1671 | Dow<br>n |
| C1QTNF7         | 379.80<br>41218 | 556.4659402 | 203.1423034 | 0.3650<br>57928 | -<br>1.453802        | 0.00<br>0119 | 0.00<br>2374 | Dow<br>n |

|                 |                 |             |             |                 |                      |              |              |          |
|-----------------|-----------------|-------------|-------------|-----------------|----------------------|--------------|--------------|----------|
|                 |                 |             |             |                 | 682                  |              |              |          |
| C1R             | 8110.7<br>45864 | 11549.5857  | 4671.906032 | 0.4045<br>08539 | -<br>1.305757<br>939 | 0.02<br>3852 | 0.13<br>7735 | Dow<br>n |
| C2              | 3785.2<br>32238 | 5607.429579 | 1963.034897 | 0.3500<br>77494 | -<br>1.514253<br>778 | 0.03<br>4527 | 0.17<br>8229 | Dow<br>n |
| C20H5orf49      | 13.997<br>90822 | 4.173770413 | 23.82204602 | 5.7075<br>60229 | 2.512874<br>179      | 0.01<br>4586 | 0.09<br>7223 | Up       |
| C21H15orf2<br>6 | 30.581<br>70341 | 44.44150216 | 16.72190465 | 0.3762<br>67764 | -<br>1.410168<br>4   | 0.03<br>8938 | 0.19<br>241  | Dow<br>n |
| C22H3orf67      | 74.565<br>07992 | 28.97768633 | 120.1524735 | 4.1463<br>79118 | 2.051852<br>033      | 0.00<br>0108 | 0.00<br>2196 | Up       |
| C23H6orf10      | 32.565<br>19469 | 4.551987268 | 60.57840211 | 13.308<br>12205 | 3.734235<br>097      | 0.04<br>4851 | 0.21<br>183  | Up       |
| C23H6orf13<br>2 | 737.93<br>83562 | 336.6672568 | 1139.209456 | 3.3837<br>84531 | 1.758637<br>705      | 1.74<br>E-06 | 6.61<br>E-05 | Up       |
| C25H16orf4<br>5 | 78.840<br>8799  | 25.59093452 | 132.0908253 | 5.1616<br>25698 | 2.367825<br>526      | 9.75<br>E-06 | 0.00<br>0291 | Up       |
| C25H16orf8<br>9 | 48.887<br>68478 | 5.6613776   | 92.11399196 | 16.270<br>59675 | 4.024195<br>26       | 4.60<br>E-09 | 3.43<br>E-07 | Up       |
| C25H16orf9<br>3 | 216.55<br>05628 | 140.723236  | 292.3778895 | 2.0776<br>80259 | 1.054973<br>65       | 0.01<br>0944 | 0.07<br>8801 | Up       |
| C25H7orf61      | 67.257<br>33241 | 15.26736435 | 119.2473005 | 7.8106<br>01606 | 2.965433<br>675      | 3.96<br>E-06 | 0.00<br>0134 | Up       |
| C27H8orf48      | 56.670<br>67427 | 89.03154549 | 24.30980305 | 0.2730<br>47075 | -<br>1.872778<br>395 | 0.00<br>1048 | 0.01<br>3751 | Dow<br>n |
| C28H10orf7<br>1 | 52.920<br>09562 | 96.51365201 | 9.326539227 | 0.0966<br>34404 | -<br>3.371319<br>28  | 0.01<br>5023 | 0.09<br>9256 | Dow<br>n |
| C28H1orf19<br>8 | 536.75<br>63486 | 750.7439895 | 322.7687078 | 0.4299<br>31791 | -<br>1.217820<br>303 | 0.00<br>5526 | 0.04<br>7751 | Dow<br>n |
| C2CD4D          | 14.986<br>4905  | 3.548272231 | 26.42470878 | 7.4472<br>04459 | 2.896698<br>966      | 0.00<br>5942 | 0.05<br>0553 | Up       |
| C2H2orf72       | 173.75<br>77606 | 79.21153078 | 268.3039904 | 3.3871<br>83504 | 1.760086<br>148      | 5.60<br>E-05 | 0.00<br>129  | Up       |
| C2H2orf88       | 82.327<br>56491 | 157.0757391 | 7.579390753 | 0.0482<br>53096 | -<br>4.373234<br>672 | 0.00<br>218  | 0.02<br>3859 | Dow<br>n |
| C3H1orf194      | 13.161<br>34079 | 2.399391667 | 23.92328992 | 9.9705<br>64724 | 3.317675<br>22       | 0.00<br>3633 | 0.03<br>4977 | Up       |

|            |                 |             |             |                 |                      |              |              |      |
|------------|-----------------|-------------|-------------|-----------------|----------------------|--------------|--------------|------|
| C3H1orf226 | 1337.1<br>86589 | 886.893482  | 1787.479696 | 2.0154<br>38981 | 1.011094<br>105      | 0.00<br>4116 | 0.03<br>8225 | Up   |
| C3H2orf54  | 563.41<br>84306 | 96.67533509 | 1030.161526 | 10.655<br>88782 | 3.413578<br>895      | 3.59<br>E-11 | 4.08<br>E-09 | Up   |
| C4BPA      | 164.53<br>67875 | 1.633257974 | 327.4403169 | 200.48<br>29134 | 7.647335<br>475      | 2.67<br>E-31 | 8.08<br>E-28 | Up   |
| C4H7orf57  | 61.221<br>46453 | 28.85793573 | 93.58499332 | 3.2429<br>5522  | 1.697309<br>103      | 0.00<br>2408 | 0.02<br>576  | Up   |
| C5H22orf23 | 52.266<br>07931 | 22.31195374 | 82.22020488 | 3.6850<br>29371 | 1.881676<br>118      | 0.00<br>1479 | 0.01<br>7875 | Up   |
| C6H4orf19  | 1190.1<br>81953 | 343.3640294 | 2036.999877 | 5.9324<br>78952 | 2.568635<br>077      | 2.85<br>E-10 | 2.74<br>E-08 | Up   |
| C7H19orf35 | 30.593<br>27107 | 15.79865239 | 45.38788975 | 2.8728<br>96285 | 1.522505<br>911      | 0.02<br>4824 | 0.14<br>1671 | Up   |
| C7H19orf57 | 61.047<br>25527 | 12.68395687 | 109.4105537 | 8.6259<br>00793 | 3.108675<br>124      | 1.59<br>E-07 | 7.80<br>E-06 | Up   |
| C7H19orf80 | 32.098<br>57363 | 63.91581078 | 0.28133648  | 0.0044<br>01673 | -<br>7.827732<br>407 | 0.01<br>8312 | 0.11<br>4352 | Down |
| C7H5orf45  | 314.90<br>86727 | 182.7193773 | 447.0979682 | 2.4469<br>1053  | 1.290961<br>351      | 0.00<br>0865 | 0.01<br>1798 | Up   |
| C8B        | 18.415<br>69913 | 2.073615137 | 34.75778312 | 16.761<br>92582 | 4.067116<br>009      | 6.79<br>E-05 | 0.00<br>1521 | Up   |
| C8H9orf152 | 339.07<br>08207 | 116.8994437 | 561.2421978 | 4.8010<br>68166 | 2.263355<br>42       | 2.05<br>E-08 | 1.26<br>E-06 | Up   |
| C8H9orf3   | 2439.5<br>6158  | 3339.966543 | 1539.156618 | 0.4608<br>29951 | -<br>1.117693<br>61  | 0.03<br>3398 | 0.17<br>3935 | Down |
| CA12       | 72.258<br>96986 | 21.97711718 | 122.5408225 | 5.5758<br>36973 | 2.479188<br>38       | 5.68<br>E-06 | 0.00<br>0185 | Up   |
| CA4        | 108.45<br>30666 | 193.5225066 | 23.38362665 | 0.1208<br>31561 | -<br>3.048930<br>756 | 0.01<br>1031 | 0.07<br>9171 | Down |
| CA5B       | 230.58<br>62239 | 356.7157706 | 104.4566772 | 0.2928<br>28873 | -<br>1.771870<br>283 | 0.00<br>255  | 0.02<br>6866 | Down |
| CA8        | 678.08<br>26787 | 108.6585487 | 1247.506809 | 11.480<br>9817  | 3.521174<br>102      | 3.92<br>E-10 | 3.67<br>E-08 | Up   |
| CA9        | 138.62<br>47124 | 90.39116585 | 186.8582589 | 2.0672<br>18153 | 1.047690<br>644      | 0.01<br>8694 | 0.11<br>6032 | Up   |
| CACNA1A    | 481.01<br>87526 | 737.6273887 | 224.4101164 | 0.3042<br>32353 | -<br>1.716754<br>511 | 0.00<br>25   | 0.02<br>6437 | Down |
| CACNA1D    | 193.42          | 283.1955746 | 103.6574582 | 0.3660          | -                    | 0.00         | 0.02         | Down |

|          |                 |             |             |                 |                      |              |              |      |
|----------|-----------------|-------------|-------------|-----------------|----------------------|--------------|--------------|------|
|          | 65164           |             |             | 27818           | 1.449974<br>799      | 2894         | 9649         | n    |
| CACNA1S  | 480.52<br>77576 | 101.1964069 | 859.8591084 | 8.4969<br>33189 | 3.086942<br>221      | 1.74<br>E-14 | 3.39<br>E-12 | Up   |
| CACNA2D1 | 1490.9<br>2749  | 2078.689374 | 903.1656057 | 0.4344<br>88008 | -<br>1.202611<br>735 | 0.02<br>5411 | 0.14<br>3807 | Down |
| CACNA2D2 | 56.899<br>64619 | 14.05245341 | 99.74683897 | 7.0981<br>79659 | 2.827449<br>09       | 2.65<br>E-06 | 9.50<br>E-05 | Up   |
| CACNB2   | 256.29<br>14105 | 411.2812589 | 101.301562  | 0.2463<br>07265 | -<br>2.021468<br>913 | 0.01<br>4951 | 0.09<br>8962 | Down |
| CACNG4   | 26.267<br>9854  | 42.69074401 | 9.845226789 | 0.2306<br>17363 | -<br>2.116426<br>961 | 0.00<br>8303 | 0.06<br>4838 | Down |
| CADM3    | 636.60<br>22528 | 1051.824827 | 221.3796787 | 0.2104<br>72004 | -<br>2.248299<br>752 | 2.32<br>E-09 | 1.85<br>E-07 | Down |
| CADM4    | 324.94<br>75175 | 165.6970924 | 484.1979426 | 2.9221<br>87321 | 1.547048<br>662      | 9.72<br>E-05 | 0.00<br>2033 | Up   |
| CALD1    | 30843.<br>37571 | 49929.11958 | 11757.63184 | 0.2354<br>86464 | -<br>2.086283<br>958 | 0.01<br>726  | 0.10<br>949  | Down |
| CALHM2   | 537.70<br>68797 | 760.1242447 | 315.2895147 | 0.4147<br>86815 | -<br>1.269558<br>058 | 0.00<br>0451 | 0.00<br>7112 | Down |
| CALM1    | 11476.<br>43659 | 15655.47441 | 7297.398762 | 0.4661<br>24409 | -<br>1.101213<br>031 | 0.00<br>1163 | 0.01<br>4853 | Down |
| CALML5   | 38.026<br>60057 | 18.8376467  | 57.21555444 | 3.0372<br>98414 | 1.602788<br>66       | 0.01<br>5973 | 0.10<br>3512 | Up   |
| CALU     | 8270.3<br>743   | 12963.07841 | 3577.67019  | 0.2759<br>89242 | -<br>1.857316<br>06  | 1.20<br>E-05 | 0.00<br>0349 | Down |
| CAMK1    | 776.41<br>49662 | 1097.80915  | 455.020782  | 0.4144<br>8077  | -<br>1.270622<br>926 | 0.00<br>0396 | 0.00<br>6402 | Down |
| CAMK1D   | 616.88<br>44431 | 929.7512949 | 304.0175914 | 0.3269<br>88081 | -<br>1.612690<br>047 | 0.01<br>4725 | 0.09<br>7994 | Down |
| CAMK4    | 88.601<br>20401 | 45.85918891 | 131.3432191 | 2.8640<br>5456  | 1.518058<br>976      | 0.00<br>1917 | 0.02<br>1594 | Up   |
| CAMKK2   | 3071.9<br>646   | 4161.155555 | 1982.773645 | 0.4764<br>9592  | -<br>1.069464        | 0.00<br>167  | 0.01<br>9473 | Down |

|         |                 |             |             |                 |                      |              |              |      |
|---------|-----------------|-------------|-------------|-----------------|----------------------|--------------|--------------|------|
|         |                 |             |             |                 | 234                  |              |              |      |
| CAMSAP3 | 1250.1<br>2064  | 618.5660806 | 1881.675199 | 3.0419<br>95444 | 1.605017<br>992      | 0.00<br>5972 | 0.05<br>0686 | Up   |
| CAP2    | 497.51<br>98602 | 816.1211157 | 178.9186047 | 0.2192<br>30456 | -<br>2.189479<br>857 | 0.03<br>5437 | 0.18<br>1126 | Down |
| CAPN2   | 5577.7<br>5914  | 8286.744125 | 2868.774155 | 0.3461<br>88335 | -<br>1.530370<br>98  | 0.00<br>1054 | 0.01<br>3782 | Down |
| CAPN3   | 100.20<br>15191 | 15.01278816 | 185.3902501 | 12.348<br>82209 | 3.626301<br>53       | 1.11<br>E-09 | 9.92<br>E-08 | Up   |
| CAPN5   | 1591.8<br>84528 | 1047.017038 | 2136.752018 | 2.0407<br>99664 | 1.029134<br>566      | 0.00<br>3174 | 0.03<br>1752 | Up   |
| CAPSL   | 90.614<br>68089 | 10.68883694 | 170.5405248 | 15.955<br>0123  | 3.995937<br>816      | 1.64<br>E-12 | 2.27<br>E-10 | Up   |
| CASK    | 927.13<br>07739 | 1386.764479 | 467.497069  | 0.3371<br>1353  | -<br>1.568693<br>563 | 1.35<br>E-05 | 0.00<br>0381 | Down |
| CASKIN1 | 44.863<br>76099 | 19.16390849 | 70.56361349 | 3.6821<br>09707 | 1.880532<br>612      | 0.00<br>2434 | 0.02<br>592  | Up   |
| CASP1   | 83.313<br>79554 | 48.14673564 | 118.4808554 | 2.4608<br>28421 | 1.299144<br>071      | 0.00<br>7083 | 0.05<br>739  | Up   |
| CASQ1   | 482.08<br>22095 | 894.9187675 | 69.24565158 | 0.0773<br>76466 | -<br>3.691961<br>351 | 0.02<br>5629 | 0.14<br>459  | Down |
| CAST    | 6596.6<br>66002 | 9374.507559 | 3818.824445 | 0.4073<br>62672 | -<br>1.295614<br>309 | 0.00<br>1962 | 0.02<br>1979 | Down |
| CAV1    | 13649.<br>93928 | 19986.49497 | 7313.383603 | 0.3659<br>16266 | -<br>1.450414<br>547 | 1.81<br>E-05 | 0.00<br>0494 | Down |
| CAV2    | 759.52<br>26598 | 1163.318284 | 355.7270352 | 0.3057<br>86507 | -<br>1.709403<br>344 | 2.24<br>E-06 | 8.22<br>E-05 | Down |
| CBLC    | 971.76<br>37866 | 264.1450703 | 1679.382503 | 6.3578<br>03692 | 2.668528<br>471      | 1.48<br>E-12 | 2.09<br>E-10 | Up   |
| CBLN2   | 62.434<br>31137 | 118.2542044 | 6.614418325 | 0.0559<br>33896 | -<br>4.160133<br>377 | 0.00<br>6213 | 0.05<br>2127 | Down |
| CBLN3   | 58.177<br>53844 | 81.53091315 | 34.82416373 | 0.4271<br>28342 | -<br>1.227258<br>465 | 0.02<br>4541 | 0.14<br>0432 | Down |
| CBX2    | 530.56<br>47324 | 344.6031558 | 716.5263089 | 2.0792<br>79591 | 1.056083<br>764      | 0.00<br>4691 | 0.04<br>2382 | Up   |



|          |                 |             |             |                 |                      |              |              |      |
|----------|-----------------|-------------|-------------|-----------------|----------------------|--------------|--------------|------|
| CBX4     | 338.35<br>02818 | 211.5048407 | 465.1957229 | 2.1994<br>56624 | 1.137147<br>15       | 0.00<br>3744 | 0.03<br>5737 | Up   |
| CCBE1    | 152.68<br>65833 | 243.4439764 | 61.92919018 | 0.2543<br>87852 | -<br>1.974898<br>318 | 0.00<br>4388 | 0.04<br>0271 | Down |
| CCDC109B | 181.08<br>99946 | 269.0307115 | 93.14927775 | 0.3462<br>40313 | -<br>1.530154<br>387 | 0.00<br>4692 | 0.04<br>2382 | Down |
| CCDC13   | 69.996<br>79052 | 19.7267811  | 120.2667999 | 6.0966<br>25664 | 2.608010<br>966      | 2.88<br>E-06 | 0.00<br>0102 | Up   |
| CCDC136  | 384.53<br>04269 | 645.950777  | 123.1100767 | 0.1905<br>87396 | -<br>2.391475<br>379 | 0.00<br>2314 | 0.02<br>4945 | Down |
| CCDC138  | 289.04<br>86007 | 185.5155911 | 392.5816103 | 2.1161<br>65051 | 1.081452<br>155      | 0.00<br>5331 | 0.04<br>6689 | Up   |
| CCDC141  | 202.50<br>80962 | 337.857034  | 67.15915843 | 0.1987<br>79814 | -<br>2.330756<br>834 | 0.01<br>2301 | 0.08<br>5537 | Down |
| CCDC146  | 53.171<br>89244 | 27.59106974 | 78.75271515 | 2.8542<br>82777 | 1.513128<br>271      | 0.02<br>1069 | 0.12<br>6391 | Up   |
| CCDC151  | 44.873<br>73249 | 67.18812868 | 22.5593363  | 0.3357<br>63724 | -<br>1.574481<br>725 | 0.00<br>9293 | 0.07<br>0184 | Down |
| CCDC155  | 46.591<br>6237  | 14.93316774 | 78.25007965 | 5.2400<br>18797 | 2.389571<br>987      | 0.00<br>0143 | 0.00<br>2772 | Up   |
| CCDC158  | 166.94<br>19791 | 33.85885493 | 300.0251034 | 8.8610<br>5286  | 3.147478<br>128      | 9.76<br>E-12 | 1.22<br>E-09 | Up   |
| CCDC160  | 216.81<br>23238 | 84.8550977  | 348.7695498 | 4.1101<br>7793  | 2.039200<br>85       | 1.80<br>E-06 | 6.81<br>E-05 | Up   |
| CCDC181  | 13.223<br>29225 | 1.175420702 | 25.2711638  | 21.499<br>6756  | 4.426242<br>987      | 0.00<br>0403 | 0.00<br>6485 | Up   |
| CCDC184  | 69.317<br>56581 | 108.5612352 | 30.07389645 | 0.2770<br>22423 | -<br>1.851925<br>336 | 0.00<br>0387 | 0.00<br>6294 | Down |
| CCDC28A  | 229.16<br>41631 | 136.7954379 | 321.5328883 | 2.3504<br>64995 | 1.232946<br>195      | 0.00<br>2272 | 0.02<br>4629 | Up   |
| CCDC3    | 7972.7<br>25017 | 13689.08474 | 2256.365291 | 0.1648<br>29522 | -<br>2.600953<br>436 | 0.04<br>8367 | 0.22<br>3891 | Down |
| CCDC30   | 113.50<br>24455 | 66.02857761 | 160.9763135 | 2.4379<br>79422 | 1.285685<br>949      | 0.00<br>4871 | 0.04<br>369  | Up   |
| CCDC37   | 53.775<br>68825 | 28.05231181 | 79.49906469 | 2.8339<br>57687 | 1.502818<br>218      | 0.00<br>9506 | 0.07<br>1337 | Up   |
| CCDC39   | 85.004          | 19.7809866  | 150.2284593 | 7.5945          | 2.924971             | 3.49         | 2.00         | Up   |

|         |                 |             |             |                 |                      |              |              |      |
|---------|-----------------|-------------|-------------|-----------------|----------------------|--------------|--------------|------|
|         | 72294           |             |             | 88801           | 854                  | E-08         | E-06         |      |
| CCDC40  | 100.84<br>11576 | 61.28351451 | 140.3988006 | 2.2909<br>71752 | 1.195959<br>67       | 0.00<br>9996 | 0.07<br>3799 | Up   |
| CCDC42B | 15.410<br>06509 | 5.181530205 | 25.63859998 | 4.9480<br>74984 | 2.306867<br>363      | 0.02<br>0531 | 0.12<br>3874 | Up   |
| CCDC57  | 659.58<br>99467 | 379.5039027 | 939.6759908 | 2.4760<br>64104 | 1.308048<br>666      | 0.00<br>0318 | 0.00<br>5351 | Up   |
| CCDC64  | 2192.5<br>66003 | 1209.532541 | 3175.599465 | 2.6254<br>76666 | 1.392579<br>374      | 0.04<br>2037 | 0.20<br>2006 | Up   |
| CCDC64B | 223.07<br>34609 | 66.36070764 | 379.7862141 | 5.7230<br>58533 | 2.516786<br>362      | 5.52<br>E-09 | 4.03<br>E-07 | Up   |
| CCDC68  | 385.96<br>25464 | 89.44831121 | 682.4767815 | 7.6298<br>45352 | 2.931653<br>816      | 3.59<br>E-13 | 5.82<br>E-11 | Up   |
| CCDC69  | 790.66<br>75478 | 1224.951453 | 356.3836426 | 0.2909<br>36952 | -<br>1.781221<br>548 | 0.00<br>0399 | 0.00<br>644  | Down |
| CCDC7   | 29.273<br>53815 | 5.98715413  | 52.55992218 | 8.7787<br>82212 | 3.134020<br>824      | 6.55<br>E-05 | 0.00<br>1479 | Up   |
| CCDC80  | 23842.<br>84659 | 39631.11241 | 8054.580761 | 0.2032<br>38826 | -<br>2.298752<br>059 | 0.02<br>621  | 0.14<br>7045 | Down |
| CCDC85A | 157.84<br>91765 | 230.2152078 | 85.48314515 | 0.3713<br>18411 | -<br>1.429271<br>245 | 0.01<br>4452 | 0.09<br>6535 | Down |
| CCL14   | 1217.5<br>09404 | 1748.705339 | 686.3134678 | 0.3924<br>69476 | -<br>1.349347<br>642 | 0.00<br>0139 | 0.00<br>2711 | Down |
| CCL16   | 227.73<br>43374 | 367.4555629 | 88.01311182 | 0.2395<br>20423 | -<br>2.061779<br>421 | 0.00<br>0818 | 0.01<br>1317 | Down |
| CCL22   | 22.751<br>81235 | 6.595172204 | 38.9084525  | 5.8995<br>35492 | 2.560601<br>366      | 0.00<br>1961 | 0.02<br>1974 | Up   |
| CCL26   | 325.71<br>07936 | 482.3887736 | 169.0328137 | 0.3504<br>07851 | -<br>1.512892<br>994 | 0.00<br>3132 | 0.03<br>1517 | Down |
| CCL27   | 38.030<br>98132 | 18.261824   | 57.80013865 | 3.1650<br>80261 | 1.662242<br>084      | 0.01<br>1134 | 0.07<br>9707 | Up   |
| CCL28   | 413.27<br>66528 | 49.27074485 | 777.2825608 | 15.775<br>74204 | 3.979635<br>961      | 6.91<br>E-21 | 4.05<br>E-18 | Up   |
| CCL5    | 340.80<br>88265 | 183.9850969 | 497.6325561 | 2.7047<br>43833 | 1.435491<br>963      | 0.00<br>0605 | 0.00<br>8915 | Up   |
| CCM2L   | 123.73<br>73015 | 186.4288605 | 61.04574257 | 0.3274<br>4792  | -<br>1.610662<br>629 | 0.00<br>0303 | 0.00<br>5119 | Down |

|        |                 |             |             |                 |                      |              |              |          |
|--------|-----------------|-------------|-------------|-----------------|----------------------|--------------|--------------|----------|
| CCND2  | 211.26<br>35642 | 307.6379088 | 114.8892197 | 0.3734<br>5599  | -<br>1.420989<br>858 | 0.00<br>0534 | 0.00<br>8109 | Dow<br>n |
| CCNE2  | 105.58<br>36281 | 153.3999192 | 57.76733703 | 0.3765<br>7997  | -<br>1.408971<br>828 | 0.00<br>2318 | 0.02<br>498  | Dow<br>n |
| CCNJL  | 103.06<br>57861 | 56.8234578  | 149.3081144 | 2.6275<br>78824 | 1.393734<br>044      | 0.00<br>2663 | 0.02<br>7739 | Up       |
| CCNYL1 | 1377.4<br>095   | 1848.147303 | 906.6716961 | 0.4905<br>84108 | -<br>1.027427<br>595 | 0.00<br>3343 | 0.03<br>2898 | Dow<br>n |
| CCR5   | 70.074<br>852   | 41.24053132 | 98.90917268 | 2.3983<br>48651 | 1.262041<br>401      | 0.01<br>4857 | 0.09<br>8548 | Up       |
| CCRN4L | 241.43<br>36571 | 366.7830498 | 116.0842645 | 0.3164<br>92991 | -<br>1.659754<br>544 | 0.00<br>2031 | 0.02<br>2568 | Dow<br>n |
| CCSER1 | 204.27<br>13065 | 116.6130699 | 291.929543  | 2.5034<br>03291 | 1.323890<br>723      | 0.00<br>1129 | 0.01<br>4563 | Up       |
| CD109  | 1453.9<br>92655 | 2479.633188 | 428.3521227 | 0.1727<br>48181 | -<br>2.533257<br>576 | 0.00<br>0877 | 0.01<br>1908 | Dow<br>n |
| CD163  | 516.96<br>58754 | 897.5058544 | 136.4258964 | 0.1520<br>05578 | -<br>2.717803<br>827 | 0.04<br>5664 | 0.21<br>4553 | Dow<br>n |
| CD177  | 72.916<br>55747 | 23.64485011 | 122.1882648 | 5.1676<br>48103 | 2.369507<br>831      | 0.00<br>02   | 0.00<br>3696 | Up       |
| CD180  | 47.085<br>34141 | 17.58826081 | 76.582422   | 4.3541<br>78212 | 2.122400<br>457      | 0.00<br>3302 | 0.03<br>2672 | Up       |
| CD1E   | 106.94<br>8565  | 43.59635885 | 170.3007712 | 3.9063<br>07217 | 1.965805<br>417      | 0.01<br>1979 | 0.08<br>4274 | Up       |
| CD2    | 252.38<br>18983 | 130.4045053 | 374.3592914 | 2.8707<br>54279 | 1.521429<br>849      | 0.00<br>0503 | 0.00<br>7742 | Up       |
| CD207  | 49.890<br>15905 | 3.24903584  | 96.53128225 | 29.710<br>74713 | 4.892912<br>98       | 7.32<br>E-06 | 0.00<br>0228 | Up       |
| CD209  | 234.03<br>1286  | 459.3844844 | 8.678087633 | 0.0188<br>90685 | -<br>5.726181<br>166 | 0.00<br>0448 | 0.00<br>7092 | Dow<br>n |
| CD244  | 233.58<br>99557 | 144.7932219 | 322.3866896 | 2.2265<br>31639 | 1.154798<br>113      | 0.00<br>3939 | 0.03<br>6943 | Up       |
| CD247  | 482.81<br>64573 | 268.3329541 | 697.2999605 | 2.5986<br>37066 | 1.377755<br>157      | 0.00<br>0236 | 0.00<br>4188 | Up       |
| CD248  | 5616.2<br>82972 | 9393.57745  | 1838.988495 | 0.1957<br>70834 | -<br>2.352762<br>245 | 3.14<br>E-06 | 0.00<br>0109 | Dow<br>n |

|         |                 |             |             |                 |                      |              |              |      |
|---------|-----------------|-------------|-------------|-----------------|----------------------|--------------|--------------|------|
| CD27    | 168.47<br>47106 | 85.26609157 | 251.6833296 | 2.9517<br>39959 | 1.561565<br>629      | 0.00<br>0228 | 0.00<br>4076 | Up   |
| CD276   | 1888.4<br>99177 | 2707.050482 | 1069.947873 | 0.3952<br>44891 | -<br>1.339181<br>28  | 0.00<br>0127 | 0.00<br>2502 | Down |
| CD300E  | 44.347<br>63031 | 19.43836991 | 69.2568907  | 3.5628<br>96015 | 1.833050<br>378      | 0.00<br>3127 | 0.03<br>149  | Up   |
| CD300LD | 51.287<br>24618 | 21.99864205 | 80.57585032 | 3.6627<br>64736 | 1.872933<br>038      | 0.00<br>1898 | 0.02<br>1472 | Up   |
| CD302   | 1708.1<br>59266 | 2326.765257 | 1089.553276 | 0.4682<br>69531 | -<br>1.094588<br>925 | 0.00<br>1884 | 0.02<br>1376 | Down |
| CD37    | 238.26<br>2488  | 146.3173706 | 330.2076054 | 2.2567<br>90182 | 1.174272<br>295      | 0.02<br>1506 | 0.12<br>8168 | Up   |
| CD3D    | 284.36<br>35061 | 159.2719571 | 409.455055  | 2.5707<br>91886 | 1.362212<br>824      | 0.00<br>053  | 0.00<br>8066 | Up   |
| CD3E    | 711.36<br>8374  | 343.1185142 | 1079.618234 | 3.1464<br>87843 | 1.653742<br>369      | 5.89<br>E-06 | 0.00<br>019  | Up   |
| CD3G    | 188.33<br>31308 | 97.03084356 | 279.6354181 | 2.8819<br>22982 | 1.527031<br>781      | 0.00<br>0266 | 0.00<br>4618 | Up   |
| CD40LG  | 21.500<br>95719 | 10.37324565 | 32.62866873 | 3.1454<br>63804 | 1.653272<br>76       | 0.04<br>0692 | 0.19<br>7848 | Up   |
| CD5     | 119.66<br>938   | 73.07216733 | 166.2665928 | 2.2753<br>75137 | 1.186104<br>419      | 0.02<br>5823 | 0.14<br>5391 | Up   |
| CD52    | 603.74<br>93487 | 309.3589811 | 898.1397164 | 2.9032<br>28196 | 1.537657<br>973      | 2.55<br>E-05 | 0.00<br>0661 | Up   |
| CD55    | 517.67<br>93673 | 829.2343157 | 206.1244188 | 0.2485<br>71984 | -<br>2.008264<br>394 | 0.01<br>5394 | 0.10<br>0793 | Down |
| CD59    | 6485.9<br>01798 | 4100.294818 | 8871.508778 | 2.1636<br>27049 | 1.113451<br>839      | 0.00<br>121  | 0.01<br>53   | Up   |
| CD5L    | 76.366<br>27603 | 138.4280559 | 14.30449617 | 0.1033<br>35238 | -<br>3.274595<br>782 | 1.30<br>E-09 | 1.13<br>E-07 | Down |
| CD6     | 113.84<br>22295 | 70.67505525 | 157.0094037 | 2.2215<br>6747  | 1.151577<br>957      | 0.01<br>0828 | 0.07<br>8317 | Up   |
| CD7     | 360.91<br>10904 | 129.3822352 | 592.4399455 | 4.5789<br>89878 | 2.195029<br>376      | 3.24<br>E-08 | 1.88<br>E-06 | Up   |
| CD74    | 42555.<br>24584 | 19514.76423 | 65595.72746 | 3.3613<br>38456 | 1.749035<br>816      | 3.96<br>E-07 | 1.77<br>E-05 | Up   |
| CD83    | 231.71<br>71921 | 141.1397887 | 322.2945955 | 2.2835<br>13376 | 1.191255<br>241      | 0.00<br>3157 | 0.03<br>1634 | Up   |
| CD84    | 199.68<br>43604 | 99.16708427 | 300.2016365 | 3.0272<br>30645 | 1.597998<br>598      | 0.00<br>0125 | 0.00<br>2471 | Up   |

|          |                 |             |             |                 |                      |              |              |      |
|----------|-----------------|-------------|-------------|-----------------|----------------------|--------------|--------------|------|
| CD8A     | 166.47<br>11432 | 82.70231825 | 250.2399682 | 3.0257<br>91459 | 1.597312<br>559      | 0.00<br>0217 | 0.00<br>3945 | Up   |
| CD8B     | 78.343<br>10102 | 46.95109914 | 109.7351029 | 2.3372<br>21171 | 1.224794<br>262      | 0.01<br>5798 | 0.10<br>2762 | Up   |
| CD96     | 259.78<br>24427 | 115.9080096 | 403.6568757 | 3.4825<br>62395 | 1.800149<br>201      | 1.06<br>E-05 | 0.00<br>0312 | Up   |
| CD99     | 12677.<br>75163 | 18730.56023 | 6624.94304  | 0.3536<br>97004 | -<br>1.499414<br>095 | 0.00<br>0619 | 0.00<br>9041 | Down |
| CDC42BPG | 2336.4<br>49827 | 1156.414994 | 3516.484659 | 3.0408<br>50108 | 1.604474<br>703      | 6.62<br>E-06 | 0.00<br>021  | Up   |
| CDC42EP2 | 344.81<br>76646 | 571.0515724 | 118.5837569 | 0.2076<br>58577 | -<br>2.267714<br>634 | 7.13<br>E-09 | 5.06<br>E-07 | Down |
| CDC42EP5 | 399.73<br>70208 | 546.7624392 | 252.7116025 | 0.4621<br>96348 | -<br>1.113422<br>235 | 0.02<br>7692 | 0.15<br>2632 | Down |
| CDCA7    | 776.65<br>19451 | 358.0268901 | 1195.277    | 3.3385<br>11808 | 1.739205<br>143      | 2.50<br>E-06 | 9.05<br>E-05 | Up   |
| CDCP1    | 994.85<br>01923 | 516.0718471 | 1473.628537 | 2.8554<br>71667 | 1.513729<br>07       | 0.00<br>0258 | 0.00<br>4508 | Up   |
| CDH1     | 3246.4<br>41197 | 694.5138735 | 5798.368521 | 8.3488<br>15974 | 3.061571<br>61       | 1.20<br>E-16 | 3.47<br>E-14 | Up   |
| CDH11    | 3650.6<br>36191 | 5527.895116 | 1773.377267 | 0.3208<br>05158 | -<br>1.640230<br>756 | 0.00<br>3078 | 0.03<br>1064 | Down |
| CDH13    | 5453.5<br>82235 | 8085.47891  | 2821.68556  | 0.3489<br>81871 | -<br>1.518776<br>001 | 0.00<br>731  | 0.05<br>8959 | Down |
| CDH17    | 86.006<br>21351 | 128.5817733 | 43.43065371 | 0.3377<br>66797 | -<br>1.565900<br>579 | 0.03<br>1488 | 0.16<br>6859 | Down |
| CDH26    | 54.272<br>89842 | 7.801663061 | 100.7441338 | 12.913<br>16133 | 3.690770<br>332      | 9.68<br>E-09 | 6.59<br>E-07 | Up   |
| CDH5     | 2346.5<br>99963 | 3205.667979 | 1487.531946 | 0.4640<br>3182  | -<br>1.107704<br>357 | 0.00<br>0997 | 0.01<br>3191 | Down |
| CDHR1    | 15.423<br>80631 | 3.962089255 | 26.88552336 | 6.7856<br>93515 | 2.762496<br>27       | 0.00<br>698  | 0.05<br>6844 | Up   |
| CDHR4    | 106.57<br>00268 | 201.3524415 | 11.78761204 | 0.0585<br>42186 | -<br>4.094379<br>578 | 0.01<br>802  | 0.11<br>3126 | Down |
| CDHR5    | 51.915<br>49942 | 22.55923507 | 81.27176377 | 3.6025<br>93949 | 1.849036<br>054      | 0.00<br>1572 | 0.01<br>8697 | Up   |

|          |                 |             |             |                 |                      |              |              |      |
|----------|-----------------|-------------|-------------|-----------------|----------------------|--------------|--------------|------|
| CDK18    | 217.03<br>05533 | 135.7860968 | 298.2750099 | 2.1966<br>53538 | 1.135307<br>342      | 0.00<br>6711 | 0.05<br>508  | Up   |
| CDKL4    | 52.408<br>67859 | 75.10032762 | 29.71702957 | 0.3956<br>97735 | -<br>1.337529<br>286 | 0.03<br>3215 | 0.17<br>3181 | Down |
| CDKN1A   | 487.68<br>73938 | 711.1485325 | 264.2262551 | 0.3715<br>48619 | -<br>1.428377<br>088 | 0.00<br>0286 | 0.00<br>4885 | Down |
| CDKN1C   | 573.38<br>11719 | 856.8113138 | 289.95103   | 0.3384<br>07098 | -<br>1.563168<br>267 | 0.02<br>7968 | 0.15<br>3597 | Down |
| CDKN2C   | 518.80<br>66452 | 740.2146905 | 297.3985998 | 0.4017<br>73436 | -<br>1.315545<br>913 | 0.00<br>173  | 0.02<br>0029 | Down |
| CDON     | 1736.6<br>04266 | 2710.224663 | 762.9838701 | 0.2815<br>20525 | -<br>1.828687<br>985 | 0.00<br>6278 | 0.05<br>2551 | Down |
| CDR2L    | 1203.6<br>10487 | 1816.403558 | 590.817416  | 0.3252<br>67705 | -<br>1.620300<br>508 | 5.56<br>E-06 | 0.00<br>0182 | Down |
| CDS1     | 197.22<br>69094 | 57.37148961 | 337.0823292 | 5.8754<br>32753 | 2.554695<br>117      | 4.54<br>E-09 | 3.39<br>E-07 | Up   |
| CEACAM19 | 301.13<br>99476 | 113.7041281 | 488.5757671 | 4.2969<br>04389 | 2.103297<br>676      | 9.87<br>E-05 | 0.00<br>2057 | Up   |
| CECR1    | 226.36<br>83198 | 93.59362163 | 359.1430181 | 3.8372<br>59546 | 1.940076<br>35       | 2.73<br>E-06 | 9.75<br>E-05 | Up   |
| CELA3B   | 13.427<br>08346 | 26.29149395 | 0.56267296  | 0.0214<br>01331 | -<br>5.546155<br>676 | 0.01<br>8707 | 0.11<br>6073 | Down |
| CELF5    | 16.899<br>25182 | 6.0531845   | 27.74531914 | 4.5835<br>90529 | 2.196478<br>168      | 0.01<br>9189 | 0.11<br>8094 | Up   |
| CELF6    | 345.34<br>81858 | 167.4763397 | 523.2200319 | 3.1241<br>42985 | 1.643460<br>484      | 0.00<br>0216 | 0.00<br>3933 | Up   |
| CELSR1   | 1578.8<br>78352 | 614.5151915 | 2543.241513 | 4.1386<br>14551 | 2.049147<br>89       | 1.25<br>E-08 | 8.17<br>E-07 | Up   |
| CELSR2   | 728.83<br>76313 | 283.5651575 | 1174.110105 | 4.1405<br>30225 | 2.049815<br>527      | 3.81<br>E-08 | 2.13<br>E-06 | Up   |
| CELSR3   | 20.095<br>04174 | 4.103210027 | 36.08687345 | 8.7947<br>90716 | 3.136649<br>247      | 0.00<br>0586 | 0.00<br>8719 | Up   |
| CEMIP    | 602.28<br>51829 | 1183.620842 | 20.94952395 | 0.0176<br>99523 | -<br>5.820145<br>734 | 0.03<br>9042 | 0.19<br>2717 | Down |
| CENPBD1  | 53.235<br>28731 | 29.23402769 | 77.23654693 | 2.6420<br>08407 | 1.401635<br>057      | 0.01<br>4228 | 0.09<br>5633 | Up   |

|        |                 |             |             |                 |                      |              |              |          |
|--------|-----------------|-------------|-------------|-----------------|----------------------|--------------|--------------|----------|
| CENPM  | 267.19<br>41041 | 395.6804466 | 138.7077616 | 0.3505<br>55007 | -<br>1.512287<br>255 | 0.01<br>207  | 0.08<br>4511 | Dow<br>n |
| CEP170 | 1152.3<br>08287 | 1556.918203 | 747.6983708 | 0.4802<br>42552 | -<br>1.058164<br>856 | 0.00<br>3195 | 0.03<br>1902 | Dow<br>n |
| CEP72  | 122.63<br>23736 | 71.54561349 | 173.7191337 | 2.4280<br>89232 | 1.279821<br>441      | 0.00<br>5914 | 0.05<br>0432 | Up       |
| CEP85L | 348.35<br>01621 | 467.1403495 | 229.5599746 | 0.4914<br>15428 | -<br>1.024984<br>944 | 0.01<br>1287 | 0.08<br>0451 | Dow<br>n |
| CERCAM | 2086.2<br>76259 | 3487.03522  | 685.5172983 | 0.1965<br>903   | -<br>2.346735<br>959 | 0.00<br>1713 | 0.01<br>9874 | Dow<br>n |
| CERS4  | 83.549<br>85102 | 50.93516936 | 116.1645327 | 2.2806<br>35053 | 1.189435<br>605      | 0.01<br>3632 | 0.09<br>2642 | Up       |
| CES4A  | 33.408<br>11498 | 1.655268097 | 65.16096186 | 39.365<br>80543 | 5.298871<br>091      | 2.15<br>E-09 | 1.74<br>E-07 | Up       |
| CFAP43 | 22.827<br>7928  | 5.816088418 | 39.83949719 | 6.8498<br>78187 | 2.776078<br>333      | 0.00<br>0893 | 0.01<br>2083 | Up       |
| CFAP44 | 132.33<br>48127 | 75.23077789 | 189.4388476 | 2.5181<br>03001 | 1.332337<br>296      | 0.00<br>2426 | 0.02<br>5884 | Up       |
| CFAP46 | 125.83<br>20318 | 37.55779323 | 214.1062703 | 5.7007<br>14869 | 2.511142<br>844      | 0.00<br>0547 | 0.00<br>8247 | Up       |
| CFAP54 | 189.20<br>41075 | 66.93406691 | 311.4741481 | 4.6534<br>47227 | 2.218299<br>846      | 2.02<br>E-07 | 9.67<br>E-06 | Up       |
| CFAP74 | 31.524<br>49879 | 8.704387511 | 54.34461006 | 6.2433<br>58306 | 2.642322<br>264      | 0.00<br>0291 | 0.00<br>4962 | Up       |
| CFB    | 7414.9<br>23049 | 12148.06214 | 2681.783953 | 0.2207<br>58169 | -<br>2.179461<br>272 | 0.00<br>5408 | 0.04<br>7156 | Dow<br>n |
| CFI    | 2466.1<br>5074  | 377.636803  | 4554.664677 | 12.060<br>96609 | 3.592273<br>568      | 1.04<br>E-21 | 6.99<br>E-19 | Up       |
| CFL2   | 2740.2<br>68428 | 4968.46369  | 512.0731658 | 0.1030<br>64689 | -<br>3.278377<br>957 | 0.00<br>2721 | 0.02<br>8232 | Dow<br>n |
| CFTR   | 50.617<br>3485  | 6.150285025 | 95.08441198 | 15.460<br>16349 | 3.950483<br>67       | 4.24<br>E-09 | 3.19<br>E-07 | Up       |
| CGN    | 2578.8<br>01896 | 1051.80703  | 4105.796761 | 3.9035<br>64668 | 1.964792<br>17       | 4.45<br>E-08 | 2.44<br>E-06 | Up       |
| CGREF1 | 693.01<br>32603 | 1234.76176  | 151.2647605 | 0.1225<br>0522  | -<br>3.029084<br>876 | 0.00<br>0382 | 0.00<br>6207 | Dow<br>n |
| CHAC2  | 103.11          | 138.1242895 | 68.10428127 | 0.4930          | -                    | 0.02         | 0.14         | Dow      |

|        |                 |             |             |                 |                      |              |              |          |
|--------|-----------------|-------------|-------------|-----------------|----------------------|--------------|--------------|----------|
|        | 42854           |             |             | 65206           | 1.020149<br>644      | 6093         | 6528         | n        |
| CHI3L1 | 10327.<br>75291 | 3473.284378 | 17182.22144 | 4.9469<br>66493 | 2.306544<br>128      | 3.75<br>E-09 | 2.85<br>E-07 | Up       |
| CHI3L2 | 51.994<br>33824 | 0.805623925 | 103.1830526 | 128.07<br>84363 | 7.000883<br>789      | 0.00<br>1649 | 0.01<br>9249 | Up       |
| CHN1   | 660.67<br>68039 | 1016.892351 | 304.4612571 | 0.2994<br>03626 | -<br>1.739836<br>401 | 0.00<br>6898 | 0.05<br>6286 | Dow<br>n |
| CHODL  | 1310.4<br>72119 | 585.3358399 | 2035.608399 | 3.4776<br>75994 | 1.798123<br>527      | 0.00<br>513  | 0.04<br>5495 | Up       |
| CHP2   | 412.89<br>35977 | 249.0445811 | 576.7426143 | 2.3158<br>20773 | 1.211523<br>604      | 0.00<br>1235 | 0.01<br>5553 | Up       |
| CHRDL1 | 1943.8<br>21352 | 3416.642079 | 471.0006249 | 0.1378<br>54833 | -<br>2.858778<br>243 | 8.99<br>E-06 | 0.00<br>0273 | Dow<br>n |
| CHRDL2 | 754.68<br>54281 | 1366.21445  | 143.1564063 | 0.1047<br>83262 | -<br>3.254519<br>818 | 0.00<br>0367 | 0.00<br>6048 | Dow<br>n |
| CHRND  | 8.4699<br>38194 | 2.073615137 | 14.86626125 | 7.1692<br>48037 | 2.841821<br>806      | 0.03<br>5879 | 0.18<br>2351 | Up       |
| CHST12 | 387.48<br>36752 | 575.623048  | 199.3443024 | 0.3463<br>10494 | -<br>1.529861<br>988 | 0.02<br>3352 | 0.13<br>5667 | Dow<br>n |
| CHST3  | 1361.5<br>5839  | 1919.107337 | 804.0094434 | 0.4189<br>497   | -<br>1.255151<br>053 | 0.01<br>3459 | 0.09<br>172  | Dow<br>n |
| CHST8  | 79.345<br>86664 | 25.71053043 | 132.9812028 | 5.1722<br>4657  | 2.370791<br>053      | 7.23<br>E-06 | 0.00<br>0227 | Up       |
| CHSY3  | 166.03<br>6752  | 291.6778075 | 40.39569649 | 0.1384<br>94241 | -<br>2.852102<br>112 | 0.02<br>8561 | 0.15<br>5851 | Dow<br>n |
| CIDEB  | 172.09<br>6059  | 274.8156837 | 69.37643417 | 0.2524<br>47143 | -<br>1.985946<br>746 | 0.00<br>1767 | 0.02<br>0318 | Dow<br>n |
| CIDEC  | 655.10<br>54746 | 1306.331368 | 3.879581131 | 0.0029<br>69829 | -<br>8.395404<br>29  | 0.00<br>0811 | 0.01<br>1271 | Dow<br>n |
| CIITA  | 856.37<br>28835 | 510.9061212 | 1201.839646 | 2.3523<br>68852 | 1.234114<br>293      | 0.00<br>0491 | 0.00<br>7622 | Up       |
| CILP   | 7014.2<br>90086 | 13695.40704 | 333.1731311 | 0.0243<br>27362 | -<br>5.361276<br>276 | 0.00<br>2462 | 0.02<br>6122 | Dow<br>n |
| CIRBP  | 7836.8          | 4828.305203 | 10845.41207 | 2.2462          | 1.167496             | 0.00         | 0.00         | Up       |



|         |                 |             |             |                 |                      |              |              |      |
|---------|-----------------|-------------|-------------|-----------------|----------------------|--------------|--------------|------|
|         | 58638           |             |             | 15103           | 091                  | 0599         | 8838         |      |
| CIST1   | 64.781<br>89708 | 30.06345607 | 99.5003381  | 3.3096<br>773   | 1.726690<br>558      | 0.00<br>2434 | 0.02<br>592  | Up   |
| CITED2  | 2730.6<br>30917 | 4133.522495 | 1327.739339 | 0.3212<br>12559 | -<br>1.638399<br>793 | 0.00<br>5191 | 0.04<br>575  | Down |
| CKAP4   | 4030.1<br>31371 | 6348.528608 | 1711.734135 | 0.2696<br>26907 | -<br>1.890963<br>618 | 4.18<br>E-06 | 0.00<br>0141 | Down |
| CKMT1B  | 89.465<br>78987 | 17.93945227 | 160.9921275 | 8.9741<br>94144 | 3.165782<br>395      | 3.64<br>E-09 | 2.77<br>E-07 | Up   |
| CLCA2   | 179.37<br>78634 | 60.98546164 | 297.7702652 | 4.8826<br>43457 | 2.287662<br>432      | 2.49<br>E-07 | 1.17<br>E-05 | Up   |
| CLCN3   | 1104.5<br>41199 | 554.1660612 | 1654.916337 | 2.9863<br>18458 | 1.578368<br>021      | 1.21<br>E-05 | 0.00<br>035  | Up   |
| CLCN4   | 195.50<br>84515 | 110.1799617 | 280.8369412 | 2.5488<br>93073 | 1.349870<br>853      | 0.00<br>1508 | 0.01<br>8109 | Up   |
| CLDN1   | 107.62<br>32312 | 39.63721829 | 175.6092441 | 4.4304<br>12923 | 2.147441<br>167      | 8.65<br>E-06 | 0.00<br>0264 | Up   |
| CLDN10  | 31.286<br>29624 | 13.86956282 | 48.70302967 | 3.5115<br>04313 | 1.812089<br>207      | 0.00<br>9139 | 0.06<br>9338 | Up   |
| CLDN19  | 15.834<br>16943 | 4.419926527 | 27.24841233 | 6.1649<br>01648 | 2.624077<br>879      | 0.00<br>8107 | 0.06<br>3684 | Up   |
| CLDN23  | 55.846<br>58728 | 12.34863505 | 99.3445395  | 8.0449<br>81416 | 3.008089<br>088      | 9.72<br>E-07 | 3.93<br>E-05 | Up   |
| CLDN3   | 1768.9<br>66777 | 842.8909996 | 2695.042553 | 3.1973<br>79679 | 1.676890<br>07       | 0.01<br>8204 | 0.11<br>4005 | Up   |
| CLDN4   | 1844.3<br>77472 | 454.4177492 | 3234.337194 | 7.1175<br>41514 | 2.831379<br>003      | 2.73<br>E-14 | 5.16<br>E-12 | Up   |
| CLDN5   | 1687.3<br>56807 | 2638.138822 | 736.574792  | 0.2792<br>02438 | -<br>1.840616<br>553 | 1.21<br>E-07 | 6.05<br>E-06 | Down |
| CLDN7   | 2620.1<br>59807 | 832.611927  | 4407.707687 | 5.2938<br>32029 | 2.404312<br>42       | 4.49<br>E-11 | 4.88<br>E-09 | Up   |
| CLEC11A | 307.96<br>62394 | 487.5589102 | 128.3735686 | 0.2632<br>9858  | -<br>1.925228<br>355 | 0.00<br>0552 | 0.00<br>8299 | Down |
| CLEC3B  | 4284.5<br>85627 | 6178.223151 | 2390.948104 | 0.3869<br>96074 | -<br>1.369609<br>164 | 5.30<br>E-05 | 0.00<br>1228 | Down |
| CLEC4A  | 96.934<br>88043 | 31.55881422 | 162.3109466 | 5.1431<br>25641 | 2.362645<br>398      | 1.99<br>E-06 | 7.38<br>E-05 | Up   |
| CLEC4E  | 19.905<br>85052 | 6.111920009 | 33.69978103 | 5.5137<br>79791 | 2.463041<br>65       | 0.03<br>7732 | 0.18<br>7989 | Up   |

|         |                 |             |             |                 |                      |              |              |          |
|---------|-----------------|-------------|-------------|-----------------|----------------------|--------------|--------------|----------|
| CLEC4G  | 21.643<br>32174 | 41.64592827 | 1.640715207 | 0.0393<br>96774 | -<br>4.665778<br>705 | 9.29<br>E-07 | 3.77<br>E-05 | Dow<br>n |
| CLEC5A  | 89.577<br>71688 | 51.01642941 | 128.1390043 | 2.5117<br>20358 | 1.328675<br>851      | 0.00<br>5989 | 0.05<br>0794 | Up       |
| CLEC6A  | 71.707<br>66308 | 22.76137094 | 120.6539552 | 5.3008<br>21095 | 2.406215<br>85       | 1.01<br>E-05 | 0.00<br>03   | Up       |
| CLEC7A  | 97.612<br>13721 | 38.73449384 | 156.4897806 | 4.0400<br>62618 | 2.014377<br>654      | 4.17<br>E-05 | 0.00<br>1004 | Up       |
| CLIC2   | 602.16<br>99352 | 916.1057479 | 288.2341224 | 0.3146<br>2975  | -<br>1.668273<br>003 | 5.86<br>E-06 | 0.00<br>019  | Dow<br>n |
| CLIC4   | 4171.2<br>92437 | 6178.812356 | 2163.772517 | 0.3501<br>92301 | -<br>1.513780<br>728 | 1.33<br>E-05 | 0.00<br>0378 | Dow<br>n |
| CLIC6   | 795.22<br>03846 | 143.1194571 | 1447.321312 | 10.112<br>68028 | 3.338093<br>518      | 1.16<br>E-17 | 3.83<br>E-15 | Up       |
| CLIP4   | 278.11<br>26598 | 82.48774671 | 473.7375728 | 5.7431<br>26606 | 2.521836<br>366      | 1.22<br>E-09 | 1.07<br>E-07 | Up       |
| CLMP    | 749.30<br>97125 | 1182.059197 | 316.5602283 | 0.2678<br>0404  | -<br>1.900750<br>371 | 0.04<br>1077 | 0.19<br>8707 | Dow<br>n |
| CLN3    | 1105.1<br>3473  | 686.3671905 | 1523.90227  | 2.2202<br>43466 | 1.150717<br>888      | 0.00<br>1132 | 0.01<br>4586 | Up       |
| CLOCK   | 1284.8<br>87613 | 1731.221854 | 838.5533723 | 0.4843<br>70833 | -<br>1.045816<br>1   | 0.00<br>2911 | 0.02<br>9754 | Dow<br>n |
| CLSTN2  | 84.639<br>76838 | 117.8865908 | 51.39294592 | 0.4359<br>52431 | -<br>1.197757<br>37  | 0.01<br>3637 | 0.09<br>2642 | Dow<br>n |
| CLTB    | 1542.0<br>36738 | 2080.597966 | 1003.475511 | 0.4823<br>01496 | -<br>1.051992<br>811 | 0.00<br>339  | 0.03<br>3286 | Dow<br>n |
| CNDP1   | 11.603<br>05225 | 3.178475453 | 20.02762905 | 6.3010<br>17371 | 2.655584<br>787      | 0.02<br>245  | 0.13<br>2033 | Up       |
| CNIH1   | 918.32<br>82072 | 1235.869455 | 600.7869596 | 0.4861<br>24936 | -<br>1.040600<br>955 | 0.00<br>3429 | 0.03<br>3527 | Dow<br>n |
| CNKSRI  | 279.82<br>35359 | 109.9294303 | 449.7176416 | 4.0909<br>66726 | 2.032441<br>803      | 6.16<br>E-07 | 2.63<br>E-05 | Up       |
| CNKSRI2 | 15.573<br>91761 | 6.47153154  | 24.67630369 | 3.8130<br>54689 | 1.930947<br>223      | 0.04<br>906  | 0.22<br>563  | Up       |
| CNN1    | 31445.<br>93693 | 58506.30139 | 4385.572472 | 0.0749<br>58977 | -<br>3.737754        | 0.01<br>6612 | 0.10<br>6406 | Dow<br>n |

|         |                 |             |             |                 |                      |              |              |          |
|---------|-----------------|-------------|-------------|-----------------|----------------------|--------------|--------------|----------|
|         |                 |             |             |                 | 935                  |              |              |          |
| CNST    | 574.34<br>54307 | 842.0961807 | 306.5946806 | 0.3640<br>8511  | -<br>1.457652<br>355 | 0.01<br>6736 | 0.10<br>7101 | Dow<br>n |
| CNTN1   | 477.81<br>06447 | 785.1718155 | 170.4494738 | 0.2170<br>85573 | -<br>2.203664<br>241 | 0.00<br>7869 | 0.06<br>2173 | Dow<br>n |
| COBL    | 252.13<br>80972 | 67.99460557 | 436.2815888 | 6.4164<br>14731 | 2.681767<br>395      | 3.18<br>E-10 | 3.02<br>E-08 | Up       |
| COCH    | 317.69<br>72198 | 555.7585181 | 79.63592158 | 0.1432<br>92309 | -<br>2.802966<br>913 | 0.02<br>9296 | 0.15<br>9035 | Dow<br>n |
| COL11A1 | 404.63<br>43965 | 761.6775704 | 47.59122258 | 0.0624<br>82111 | -<br>4.000412<br>991 | 0.02<br>6872 | 0.14<br>9376 | Dow<br>n |
| COL11A2 | 134.39<br>4102  | 62.57078015 | 206.2174239 | 3.2957<br>46407 | 1.720605<br>238      | 0.00<br>014  | 0.00<br>2729 | Up       |
| COL12A1 | 25244.<br>78964 | 45110.11832 | 5379.460959 | 0.1192<br>51759 | -<br>3.067917<br>548 | 0.00<br>0109 | 0.00<br>2203 | Dow<br>n |
| COL14A1 | 16131.<br>65349 | 29585.7051  | 2677.601874 | 0.0905<br>0323  | -<br>3.465886<br>907 | 0.00<br>0781 | 0.01<br>0934 | Dow<br>n |
| COL17A1 | 11658.<br>62667 | 2322.119598 | 20995.13374 | 9.0413<br>66242 | 3.176540<br>795      | 5.54<br>E-18 | 1.97<br>E-15 | Up       |
| COL19A1 | 10.367<br>16912 | 2.069085122 | 18.66525312 | 9.0210<br>17511 | 3.173290<br>169      | 0.01<br>6546 | 0.10<br>6164 | Up       |
| COL1A1  | 598852<br>.8897 | 1102775.715 | 94930.06407 | 0.0860<br>82839 | -<br>3.538130<br>536 | 0.00<br>7957 | 0.06<br>2782 | Dow<br>n |
| COL1A2  | 367056<br>.7897 | 675659.9596 | 58453.61975 | 0.0865<br>1337  | -<br>3.530933<br>09  | 0.00<br>544  | 0.04<br>723  | Dow<br>n |
| COL21A1 | 1112.0<br>07846 | 1900.803241 | 323.2124517 | 0.1700<br>39931 | -<br>2.556054<br>517 | 0.00<br>104  | 0.01<br>3683 | Dow<br>n |
| COL23A1 | 209.01<br>76502 | 44.96555365 | 373.0697468 | 8.2967<br>89798 | 3.052553<br>235      | 6.88<br>E-12 | 8.74<br>E-10 | Up       |
| COL25A1 | 404.57<br>44802 | 211.5000517 | 597.6489088 | 2.8257<br>62472 | 1.498640<br>201      | 0.04<br>0144 | 0.19<br>6145 | Up       |
| COL26A1 | 241.65<br>4512  | 13.91586266 | 469.3931613 | 33.730<br>79865 | 5.075994<br>573      | 3.92<br>E-25 | 5.08<br>E-22 | Up       |
| COL3A1  | 640113<br>.6384 | 1155220.676 | 125006.6009 | 0.1082<br>10149 | -<br>3.208092        | 0.00<br>758  | 0.06<br>0731 | Dow<br>n |

|          |             |             |             |             |              |          |          |      |
|----------|-------------|-------------|-------------|-------------|--------------|----------|----------|------|
|          |             |             |             |             | 286          |          |          |      |
| COL4A1   | 62423.64209 | 92466.51648 | 32380.7677  | 0.350189116 | -1.513793848 | 7.19E-05 | 0.001589 | Down |
| COL4A2   | 45042.43877 | 65101.34853 | 24983.52902 | 0.383763618 | -1.381710151 | 4.23E-05 | 0.001012 | Down |
| COL5A1   | 34444.65992 | 61144.00393 | 7745.315917 | 0.126673352 | -2.980815038 | 0.000224 | 0.004044 | Down |
| COL5A2   | 38726.37241 | 70597.34167 | 6855.403145 | 0.097105684 | -3.364300446 | 0.000692 | 0.009893 | Down |
| COL5A3   | 5824.455994 | 10411.10647 | 1237.805521 | 0.118892792 | -3.072266836 | 0.004832 | 0.043407 | Down |
| COL6A1   | 62186.21153 | 102295.3515 | 22077.0716  | 0.215816958 | -2.212119863 | 0.012159 | 0.085004 | Down |
| COL6A2   | 54224.67363 | 87224.32962 | 21225.01764 | 0.243338272 | -2.038964851 | 0.018392 | 0.114747 | Down |
| COL6A3   | 88437.89272 | 164887.0452 | 11988.74029 | 0.072708807 | -3.781726073 | 1.84E-05 | 0.000499 | Down |
| COL6A6   | 688.357989  | 1340.131127 | 36.58485104 | 0.027299456 | -5.194983975 | 2.56E-08 | 1.52E-06 | Down |
| COL7A1   | 3370.175644 | 1078.626792 | 5661.724496 | 5.249011556 | 2.392045774  | 2.98E-11 | 3.42E-09 | Up   |
| COL8A1   | 22475.11598 | 44745.95131 | 204.2806535 | 0.004565344 | -7.775060761 | 0.000614 | 0.008971 | Down |
| COL9A1   | 500.8061132 | 217.8223597 | 783.7898666 | 3.598298484 | 1.847314865  | 2.34E-05 | 0.000617 | Up   |
| COL9A3   | 187.0886784 | 102.8796709 | 271.2976858 | 2.637038818 | 1.398918808  | 0.001646 | 0.019238 | Up   |
| COLGALT1 | 2448.375005 | 3353.260238 | 1543.489772 | 0.460295254 | -1.119368529 | 0.001068 | 0.013912 | Down |
| COLQ     | 56.17791067 | 91.5706313  | 20.78519004 | 0.226985331 | -2.13932903  | 0.031031 | 0.165065 | Down |
| COMP     | 170.11      | 279.9313674 | 60.28954575 | 0.2153      | -            | 0.00     | 0.00     | Down |

|         |                 |             |             |                 |                      |              |              |          |
|---------|-----------------|-------------|-------------|-----------------|----------------------|--------------|--------------|----------|
|         | 04566           |             |             | 72598           | 2.215093<br>391      | 0144         | 2793         | n        |
| COPZ2   | 1322.9<br>26314 | 2080.492058 | 565.3605709 | 0.2717<br>43681 | -<br>1.879681<br>605 | 0.00<br>3038 | 0.03<br>0795 | Dow<br>n |
| CORO1A  | 1319.0<br>43605 | 857.7410796 | 1780.34613  | 2.0756<br>21855 | 1.053543<br>631      | 0.00<br>2001 | 0.02<br>2257 | Up       |
| CORO1C  | 2852.6<br>61818 | 4230.602254 | 1474.721381 | 0.3485<br>84266 | -<br>1.520420<br>643 | 0.00<br>9859 | 0.07<br>3181 | Dow<br>n |
| CORO2A  | 538.18<br>30416 | 163.1252677 | 913.2408155 | 5.5984<br>01942 | 2.485015<br>07       | 5.44<br>E-11 | 5.81<br>E-09 | Up       |
| CORO2B  | 309.33<br>12459 | 437.2446375 | 181.4178544 | 0.4149<br>11559 | -<br>1.269124<br>244 | 0.00<br>0987 | 0.01<br>3115 | Dow<br>n |
| CPE     | 1877.0<br>33011 | 3184.283685 | 569.782338  | 0.1789<br>35797 | -<br>2.482486<br>063 | 0.02<br>284  | 0.13<br>3673 | Dow<br>n |
| CPEB4   | 1229.5<br>48236 | 1928.211215 | 530.8852567 | 0.2753<br>25261 | -<br>1.860791<br>11  | 3.36<br>E-07 | 1.52<br>E-05 | Dow<br>n |
| CPED1   | 427.50<br>50664 | 730.7634987 | 124.2466341 | 0.1700<br>23043 | -<br>2.556197<br>805 | 0.00<br>9022 | 0.06<br>8968 | Dow<br>n |
| CPNE8   | 431.29<br>84237 | 643.1607276 | 219.4361199 | 0.3411<br>83954 | -<br>1.551378<br>299 | 3.46<br>E-05 | 0.00<br>0859 | Dow<br>n |
| CPT1B   | 197.83<br>90601 | 124.5979833 | 271.0801368 | 2.1756<br>38238 | 1.121438<br>687      | 0.00<br>6563 | 0.05<br>4245 | Up       |
| CRABP1  | 169.99<br>52833 | 56.15281415 | 283.8377525 | 5.0547<br>37804 | 2.337636<br>26       | 1.03<br>E-07 | 5.25<br>E-06 | Up       |
| CRABP2  | 827.00<br>93337 | 1320.106255 | 333.9124123 | 0.2529<br>43588 | -<br>1.983112<br>429 | 0.04<br>2443 | 0.20<br>3502 | Dow<br>n |
| CRACR2A | 803.89<br>57026 | 364.3486837 | 1243.442722 | 3.4127<br>82252 | 1.770948<br>368      | 1.91<br>E-06 | 7.07<br>E-05 | Up       |
| CRB1    | 41.686<br>73469 | 71.78866621 | 11.58480317 | 0.1613<br>73707 | -<br>2.631522<br>562 | 3.72<br>E-05 | 0.00<br>0911 | Dow<br>n |
| CRB3    | 146.36<br>88164 | 73.81814354 | 218.9194893 | 2.9656<br>59644 | 1.568353<br>035      | 0.01<br>6971 | 0.10<br>8108 | Up       |
| CREB3L1 | 1943.5<br>95204 | 3247.09544  | 640.0949691 | 0.1971<br>28474 | -<br>2.342791<br>915 | 4.62<br>E-11 | 5.00<br>E-09 | Dow<br>n |

|                |                 |             |             |                 |                      |              |              |      |
|----------------|-----------------|-------------|-------------|-----------------|----------------------|--------------|--------------|------|
| CREB3L4        | 304.31<br>53809 | 168.1864365 | 440.4443252 | 2.6187<br>86238 | 1.388898<br>302      | 0.00<br>0337 | 0.00<br>5639 | Up   |
| CREB5          | 295.62<br>45724 | 469.0408953 | 122.2082496 | 0.2605<br>49242 | -<br>1.940372<br>038 | 0.00<br>9032 | 0.06<br>9013 | Down |
| CREG2          | 29.728<br>72391 | 42.95681451 | 16.50063331 | 0.3841<br>21437 | -<br>1.380365<br>616 | 0.04<br>0744 | 0.19<br>795  | Down |
| CREM           | 212.54<br>79595 | 285.9614335 | 139.1344855 | 0.4865<br>49825 | -<br>1.039340<br>543 | 0.01<br>1029 | 0.07<br>9171 | Down |
| CRISPLD2       | 11879.<br>32356 | 18495.08825 | 5263.558871 | 0.2845<br>92255 | -<br>1.813031<br>695 | 0.00<br>6697 | 0.05<br>5017 | Down |
| CRLF1          | 3319.9<br>79874 | 5718.483632 | 921.4761162 | 0.1611<br>39941 | -<br>2.633613<br>961 | 0.00<br>2068 | 0.02<br>2884 | Down |
| CROT           | 1474.1<br>93059 | 860.1819695 | 2088.204148 | 2.4276<br>3069  | 1.279548<br>964      | 0.00<br>0223 | 0.00<br>4027 | Up   |
| CRTAM          | 54.797<br>17461 | 27.13727722 | 82.45707199 | 3.0385<br>16773 | 1.603367<br>256      | 0.00<br>5351 | 0.04<br>6797 | Up   |
| CRYAB          | 2809.2<br>11868 | 1759.61056  | 3858.813176 | 2.1929<br>92736 | 1.132901<br>033      | 0.00<br>0846 | 0.01<br>1625 | Up   |
| CSDC2          | 276.03<br>44757 | 134.689523  | 417.3794283 | 3.0988<br>26241 | 1.631721<br>861      | 0.00<br>1295 | 0.01<br>6144 | Up   |
| CSF1           | 2066.9<br>69655 | 2831.252875 | 1302.686435 | 0.4601<br>09532 | -<br>1.119950<br>75  | 0.00<br>7538 | 0.06<br>0472 | Down |
| CSF1R          | 1881.1<br>23038 | 1160.198232 | 2602.047845 | 2.2427<br>6143  | 1.165276<br>164      | 0.00<br>0607 | 0.00<br>8926 | Up   |
| CSF2RB         | 2871.0<br>42216 | 1818.177462 | 3923.906971 | 2.1581<br>54005 | 1.109797<br>818      | 0.02<br>0253 | 0.12<br>2523 | Up   |
| CSF3           | 138.32<br>67334 | 88.60802848 | 188.0454383 | 2.1222<br>16705 | 1.085571<br>981      | 0.01<br>1309 | 0.08<br>0515 | Up   |
| CSGALNA<br>CT2 | 884.14<br>07857 | 1193.751272 | 574.5302993 | 0.4812<br>81413 | -<br>1.055047<br>386 | 0.03<br>664  | 0.18<br>4991 | Down |
| CSRP2          | 919.27<br>7265  | 1464.35242  | 374.2021104 | 0.2555<br>4102  | -<br>1.968373<br>203 | 0.00<br>0474 | 0.00<br>7428 | Down |
| CST3           | 20256.<br>59191 | 34903.7158  | 5609.468014 | 0.1607<br>12631 | -<br>2.637444<br>771 | 0.01<br>0122 | 0.07<br>4426 | Down |
| CST6           | 300.28          | 401.9107869 | 198.6546443 | 0.4942          | -                    | 0.04         | 0.22         | Down |

|           |                 |             |             |                 |                      |              |              |      |
|-----------|-----------------|-------------|-------------|-----------------|----------------------|--------------|--------------|------|
|           | 27156           |             |             | 75473           | 1.016612<br>776      | 9257         | 5939         | n    |
| CST7      | 113.65<br>75789 | 39.79356874 | 187.521589  | 4.7123<br>59181 | 2.236449<br>507      | 3.58<br>E-06 | 0.00<br>0123 | Up   |
| CTGF      | 21144.<br>73142 | 40246.6186  | 2042.844242 | 0.0507<br>58158 | -<br>4.300216<br>463 | 0.00<br>5961 | 0.05<br>0669 | Down |
| CTHRC1    | 849.75<br>58697 | 1602.989314 | 96.52242587 | 0.0602<br>14017 | -<br>4.053756<br>823 | 0.00<br>5112 | 0.04<br>5358 | Down |
| CTSL      | 60.667<br>04518 | 88.48021753 | 32.85387283 | 0.3713<br>13201 | -<br>1.429291<br>486 | 0.01<br>5636 | 0.10<br>178  | Down |
| CTSO      | 495.45<br>5732  | 323.986764  | 666.9247    | 2.0584<br>93661 | 1.041589<br>006      | 0.00<br>3964 | 0.03<br>7128 | Up   |
| CTSW      | 862.48<br>30643 | 257.3054488 | 1467.66068  | 5.7039<br>62689 | 2.511964<br>545      | 1.92<br>E-11 | 2.32<br>E-09 | Up   |
| CTXN1     | 49.382<br>01102 | 24.18568345 | 74.57833859 | 3.0835<br>7375  | 1.624603<br>352      | 0.00<br>497  | 0.04<br>4446 | Up   |
| CX3CL1    | 2072.4<br>14192 | 676.0664463 | 3468.761938 | 5.1308<br>00319 | 2.359183<br>88       | 3.97<br>E-11 | 4.42<br>E-09 | Up   |
| CX3CR1    | 1072.7<br>55656 | 280.0430365 | 1865.468277 | 6.6613<br>62839 | 2.735817<br>366      | 4.38<br>E-09 | 3.29<br>E-07 | Up   |
| CXADR     | 271.16<br>98317 | 84.29240096 | 458.0472624 | 5.4340<br>27945 | 2.442021<br>985      | 1.22<br>E-06 | 4.78<br>E-05 | Up   |
| CXCL10    | 319.78<br>73379 | 80.56203279 | 559.012643  | 6.9389<br>09355 | 2.794708<br>92       | 0.00<br>0243 | 0.00<br>4287 | Up   |
| CXCL13    | 87.278<br>3632  | 3.667382879 | 170.8893435 | 46.597<br>08275 | 5.542167<br>732      | 0.00<br>0608 | 0.00<br>8937 | Up   |
| CXCL17    | 66.106<br>05299 | 31.24325209 | 100.9688539 | 3.2317<br>01156 | 1.692293<br>794      | 0.00<br>2178 | 0.02<br>3859 | Up   |
| CXCL9     | 116.04<br>47909 | 28.22465743 | 203.8649243 | 7.2229<br>37066 | 2.852585<br>6        | 0.01<br>3867 | 0.09<br>3903 | Up   |
| CXCR3     | 38.558<br>17197 | 13.6397616  | 63.47658233 | 4.6537<br>8972  | 2.218406<br>025      | 0.00<br>0717 | 0.01<br>0152 | Up   |
| CXCR4     | 554.30<br>36843 | 342.4390367 | 766.1683318 | 2.2373<br>86073 | 1.161814<br>223      | 0.00<br>1574 | 0.01<br>8712 | Up   |
| CXCR6     | 216.60<br>68978 | 89.19665456 | 344.017141  | 3.8568<br>39056 | 1.947418<br>944      | 2.49<br>E-05 | 0.00<br>0651 | Up   |
| CXHXorf36 | 760.90<br>06996 | 1190.537721 | 331.2636779 | 0.2782<br>47108 | -<br>1.845561<br>402 | 2.78<br>E-07 | 1.30<br>E-05 | Down |
| CYB561    | 1396.3<br>24203 | 543.9463763 | 2248.702029 | 4.1340<br>50941 | 2.047556<br>166      | 1.66<br>E-07 | 8.10<br>E-06 | Up   |

|         |                 |             |             |                 |                      |              |              |      |
|---------|-----------------|-------------|-------------|-----------------|----------------------|--------------|--------------|------|
| CYBB    | 758.02<br>84762 | 442.6782884 | 1073.378664 | 2.4247<br>3754  | 1.277828<br>594      | 0.00<br>8064 | 0.06<br>344  | Up   |
| CYP11A1 | 1253.4<br>6748  | 53.7655859  | 2453.169375 | 45.627<br>12995 | 5.511820<br>003      | 3.28<br>E-38 | 3.08<br>E-34 | Up   |
| CYP1B1  | 80.570<br>30883 | 39.41793288 | 121.7226848 | 3.0880<br>02741 | 1.626674<br>033      | 0.00<br>1062 | 0.01<br>3874 | Up   |
| CYP24A1 | 53.682<br>77778 | 6.529141834 | 100.8364137 | 15.444<br>05319 | 3.948979<br>523      | 1.89<br>E-09 | 1.56<br>E-07 | Up   |
| CYP27B1 | 35.253<br>6303  | 19.38981965 | 51.11744095 | 2.6363<br>03064 | 1.398516<br>229      | 0.03<br>4067 | 0.17<br>6461 | Up   |
| CYP27C1 | 13.706<br>88561 | 0.805623925 | 26.6081473  | 33.028<br>00038 | 5.045617<br>722      | 1.00<br>E-04 | 0.00<br>2066 | Up   |
| CYP2B6  | 60.841<br>63223 | 18.6536309  | 103.0296336 | 5.5233<br>01824 | 2.465530<br>967      | 0.00<br>098  | 0.01<br>3047 | Up   |
| CYP2S1  | 215.76<br>73256 | 71.61279823 | 359.9218529 | 5.0259<br>43152 | 2.329394<br>353      | 6.60<br>E-08 | 3.53<br>E-06 | Up   |
| CYP46A1 | 4.8533<br>11951 | 9.175174875 | 0.531449026 | 0.0579<br>22496 | -<br>4.109732<br>428 | 0.03<br>6366 | 0.18<br>403  | Down |
| CYP4F2  | 10.868<br>60016 | 2.003054751 | 19.73414558 | 9.8520<br>25046 | 3.300420<br>295      | 0.00<br>8505 | 0.06<br>5816 | Up   |
| CYR61   | 13383.<br>95867 | 25362.83134 | 1405.085998 | 0.0553<br>99414 | -<br>4.173985<br>469 | 0.03<br>4283 | 0.17<br>7334 | Down |
| DAAM2   | 1775.9<br>56729 | 2727.575169 | 824.3382878 | 0.3022<br>23857 | -<br>1.726310<br>546 | 8.87<br>E-07 | 3.61<br>E-05 | Down |
| DAB2    | 2604.7<br>67566 | 4604.306374 | 605.228759  | 0.1314<br>48412 | -<br>2.927431<br>387 | 0.00<br>0668 | 0.00<br>9607 | Down |
| DACT1   | 831.37<br>22656 | 1274.935047 | 387.809484  | 0.3041<br>79797 | -<br>1.717003<br>759 | 0.00<br>1925 | 0.02<br>165  | Down |
| DACT2   | 263.93<br>03509 | 484.4725111 | 43.38819066 | 0.0895<br>5759  | -<br>3.481040<br>479 | 1.25<br>E-10 | 1.29<br>E-08 | Down |
| DAGLA   | 864.20<br>32523 | 443.775845  | 1284.63066  | 2.8947<br>73733 | 1.533450<br>586      | 2.35<br>E-05 | 0.00<br>062  | Up   |
| DAO     | 10.596<br>91325 | 1.981044628 | 19.21278188 | 9.6983<br>08465 | 3.277733<br>141      | 0.01<br>0942 | 0.07<br>8801 | Up   |
| DAPP1   | 165.10<br>36903 | 73.42435846 | 256.7830222 | 3.4972<br>45704 | 1.806219<br>158      | 2.79<br>E-05 | 0.00<br>0714 | Up   |
| DAW1    | 6.4376<br>07294 | 0.805623925 | 12.06959066 | 14.981<br>6686  | 3.905126<br>409      | 0.02<br>4682 | 0.14<br>1132 | Up   |



|         |                 |             |             |                 |                      |              |              |      |
|---------|-----------------|-------------|-------------|-----------------|----------------------|--------------|--------------|------|
| DBNDD1  | 98.701<br>61896 | 36.65683395 | 160.746404  | 4.3851<br>68785 | 2.132632<br>373      | 1.41<br>E-05 | 0.00<br>0394 | Up   |
| DBX2    | 31.566<br>70148 | 16.60202588 | 46.53137707 | 2.8027<br>52953 | 1.486844<br>585      | 0.03<br>5942 | 0.18<br>2423 | Up   |
| DCBLD2  | 1316.2<br>15181 | 1897.133374 | 735.2969893 | 0.3875<br>83182 | -<br>1.367422<br>125 | 0.00<br>0532 | 0.00<br>8088 | Down |
| DCHS2   | 208.57<br>9257  | 43.91474414 | 373.2437698 | 8.4992<br>81441 | 3.087340<br>876      | 2.65<br>E-12 | 3.53<br>E-10 | Up   |
| DCLK1   | 2125.8<br>2623  | 3743.671532 | 507.9809285 | 0.1356<br>90571 | -<br>2.881607<br>62  | 0.00<br>3493 | 0.03<br>4039 | Down |
| DCN     | 81097.<br>66115 | 140170.6098 | 22024.71246 | 0.1571<br>27892 | -<br>2.669988<br>795 | 0.02<br>9415 | 0.15<br>922  | Down |
| DCUN1D3 | 693.04<br>83783 | 942.4898547 | 443.6069018 | 0.4706<br>75519 | -<br>1.087195<br>277 | 0.01<br>2681 | 0.08<br>754  | Down |
| DDAH1   | 654.01<br>93557 | 876.7783524 | 431.260359  | 0.4918<br>69305 | -<br>1.023653<br>068 | 0.01<br>4887 | 0.09<br>8688 | Down |
| DDAH2   | 2268.2<br>37039 | 3114.823821 | 1421.650258 | 0.4564<br>1434  | -<br>1.131583<br>976 | 0.00<br>3886 | 0.03<br>6647 | Down |
| DDC     | 311.60<br>10082 | 78.67452919 | 544.5274873 | 6.9212<br>67822 | 2.791036<br>332      | 0.00<br>7194 | 0.05<br>8103 | Up   |
| DDR1    | 5851.3<br>11314 | 2027.479865 | 9675.142764 | 4.7720<br>04365 | 2.254595<br>363      | 2.57<br>E-10 | 2.52<br>E-08 | Up   |
| DDR2    | 5405.1<br>2714  | 7559.163858 | 3251.090422 | 0.4300<br>85983 | -<br>1.217302<br>98  | 0.00<br>0522 | 0.00<br>7978 | Down |
| DDX11   | 513.66<br>71041 | 340.9695284 | 686.3646797 | 2.0129<br>79526 | 1.009332<br>499      | 0.00<br>6841 | 0.05<br>5977 | Up   |
| DEF6    | 200.22<br>79414 | 120.5007087 | 279.9551742 | 2.3232<br>65789 | 1.216154<br>212      | 0.00<br>2898 | 0.02<br>9673 | Up   |
| DEFB4A  | 12.182<br>87209 | 1.219440949 | 23.14630324 | 18.981<br>07756 | 4.246489<br>991      | 0.00<br>0846 | 0.01<br>1625 | Up   |
| DEFB5   | 24.943<br>4989  | 0.854174188 | 49.0328236  | 57.403<br>77585 | 5.843073<br>731      | 3.34<br>E-08 | 1.93<br>E-06 | Up   |
| DEGS2   | 159.95<br>46763 | 10.60517177 | 309.3041807 | 29.165<br>40981 | 4.866186<br>441      | 8.41<br>E-21 | 4.77<br>E-18 | Up   |
| DENND1C | 356.81<br>14315 | 229.959875  | 483.6629879 | 2.1032<br>49482 | 1.072619<br>989      | 0.00<br>7008 | 0.05<br>6953 | Up   |
| DENND2A | 717.22          | 1182.764988 | 251.6892457 | 0.2127          | -                    | 2.89         | 1.33         | Down |

|         |                 |             |             |                 |                      |              |              |          |
|---------|-----------------|-------------|-------------|-----------------|----------------------|--------------|--------------|----------|
|         | 71168           |             |             | 97342           | 2.232447<br>964      | E-07         | E-05         | n        |
| DENND4A | 739.89<br>27612 | 992.9941514 | 486.791371  | 0.4902<br>25819 | -<br>1.028481<br>626 | 0.00<br>6147 | 0.05<br>1736 | Dow<br>n |
| DEPDC7  | 141.05<br>74649 | 77.81549442 | 204.2994355 | 2.6254<br>3388  | 1.392555<br>863      | 0.00<br>176  | 0.02<br>0266 | Up       |
| DERL3   | 189.58<br>05636 | 89.31834621 | 289.842781  | 3.2450<br>53153 | 1.698242<br>109      | 5.56<br>E-05 | 0.00<br>1284 | Up       |
| DES     | 90031.<br>28332 | 167017.2063 | 13045.36033 | 0.0781<br>07883 | -<br>3.678388<br>04  | 0.01<br>9596 | 0.11<br>9708 | Dow<br>n |
| DFNB31  | 166.34<br>75314 | 69.47281418 | 263.2222486 | 3.7888<br>52542 | 1.921760<br>993      | 1.01<br>E-05 | 0.00<br>03   | Up       |
| DFNB59  | 43.424<br>2697  | 66.52475074 | 20.32378865 | 0.3055<br>07175 | -<br>1.710721<br>833 | 0.03<br>5248 | 0.18<br>0824 | Dow<br>n |
| DGAT2   | 548.16<br>37308 | 1070.304731 | 26.02273038 | 0.0243<br>13384 | -<br>5.362105<br>459 | 0.00<br>1064 | 0.01<br>3886 | Dow<br>n |
| DGKG    | 159.27<br>72077 | 294.2600775 | 24.29433778 | 0.0825<br>60767 | -<br>3.598399<br>811 | 0.01<br>7722 | 0.11<br>1832 | Dow<br>n |
| DGKH    | 131.93<br>48148 | 184.1016689 | 79.76796078 | 0.4332<br>82117 | -<br>1.206621<br>403 | 0.02<br>2177 | 0.13<br>0762 | Dow<br>n |
| DHRS9   | 32.476<br>29369 | 12.28874517 | 52.66384221 | 4.2855<br>34566 | 2.099475<br>173      | 0.00<br>2377 | 0.02<br>5502 | Up       |
| DIAPH2  | 25.148<br>5196  | 44.02640523 | 6.270633976 | 0.1424<br>28934 | -<br>2.811685<br>837 | 0.00<br>0852 | 0.01<br>168  | Dow<br>n |
| DIO1    | 28.715<br>63718 | 7.01287929  | 50.41839507 | 7.1894<br>001   | 2.845871<br>394      | 0.04<br>3464 | 0.20<br>6936 | Up       |
| DIO3    | 73.076<br>0316  | 40.56179817 | 105.590265  | 2.6031<br>94873 | 1.380283<br>315      | 0.00<br>7454 | 0.05<br>9878 | Up       |
| DIRAS3  | 148.79<br>03316 | 80.73875373 | 216.8419094 | 2.6857<br>22771 | 1.425310<br>393      | 0.00<br>1915 | 0.02<br>1594 | Up       |
| DKK1    | 196.13<br>06136 | 53.82337207 | 338.437855  | 6.2879<br>34813 | 2.652586<br>261      | 1.75<br>E-09 | 1.47<br>E-07 | Up       |
| DKK3    | 2808.4<br>11998 | 4316.506717 | 1300.317278 | 0.3012<br>42964 | -<br>1.731000<br>549 | 0.04<br>566  | 0.21<br>4553 | Dow<br>n |
| DLC1    | 1332.1<br>80297 | 2221.603234 | 442.757359  | 0.1992<br>96324 | -<br>2.327012        | 2.19<br>E-09 | 1.76<br>E-07 | Dow<br>n |

|         |                 |             |             |                 |                      |              |              |      |
|---------|-----------------|-------------|-------------|-----------------|----------------------|--------------|--------------|------|
|         |                 |             |             |                 | 992                  |              |              |      |
| DLK1    | 258.65<br>01985 | 102.4376821 | 414.8627149 | 4.0499<br>03379 | 2.017887<br>489      | 0.00<br>1155 | 0.01<br>477  | Up   |
| DLK2    | 404.75<br>91666 | 146.5937429 | 662.9245902 | 4.5221<br>88852 | 2.177021<br>242      | 5.58<br>E-06 | 0.00<br>0183 | Up   |
| DLL3    | 9.6716<br>62374 | 2.078145153 | 17.2651796  | 8.3079<br>7578  | 3.054497<br>01       | 0.01<br>8452 | 0.11<br>5082 | Up   |
| DLL4    | 833.39<br>90992 | 1122.20553  | 544.5926682 | 0.4852<br>87814 | -<br>1.043087<br>463 | 0.00<br>3844 | 0.03<br>6355 | Down |
| DMGDH   | 538.70<br>88173 | 58.52490019 | 1018.892734 | 17.409<br>55954 | 4.121807<br>798      | 2.97<br>E-11 | 3.42<br>E-09 | Up   |
| DMP1    | 30.687<br>63687 | 3.24903584  | 58.1262379  | 17.890<br>3037  | 4.161105<br>973      | 5.76<br>E-07 | 2.49<br>E-05 | Up   |
| DMPK    | 5312.9<br>80359 | 9391.1501   | 1234.810619 | 0.1314<br>86624 | -<br>2.927012<br>055 | 0.01<br>8885 | 0.11<br>6857 | Down |
| DMRT2   | 598.73<br>39124 | 879.7427879 | 317.7250369 | 0.3611<br>5674  | -<br>1.469303<br>002 | 0.01<br>5156 | 0.09<br>9836 | Down |
| DMRTA1  | 36.972<br>0275  | 5.181530205 | 68.76252479 | 13.270<br>69844 | 3.730172<br>397      | 5.83<br>E-07 | 2.52<br>E-05 | Up   |
| DMTN    | 68.768<br>32157 | 101.2088346 | 36.32780854 | 0.3589<br>39105 | -<br>1.478188<br>986 | 0.00<br>3879 | 0.03<br>6605 | Down |
| DMXL2   | 295.77<br>2327  | 446.3971915 | 145.1474625 | 0.3251<br>53171 | -<br>1.620808<br>6   | 3.68<br>E-05 | 0.00<br>0906 | Down |
| DNAAF3  | 70.441<br>93304 | 14.00438841 | 126.8794777 | 9.0599<br>79912 | 3.179507<br>851      | 2.27<br>E-08 | 1.37<br>E-06 | Up   |
| DNAH1   | 182.28<br>90042 | 277.7160588 | 86.86194957 | 0.3127<br>72513 | -<br>1.676814<br>364 | 0.00<br>1948 | 0.02<br>1854 | Down |
| DNAH10  | 29.726<br>1041  | 8.668787341 | 50.78342086 | 5.8581<br>92024 | 2.550455<br>484      | 0.00<br>0574 | 0.00<br>8582 | Up   |
| DNAH5   | 36.262<br>20828 | 12.37566045 | 60.14875612 | 4.8602<br>46154 | 2.281029<br>383      | 0.00<br>0754 | 0.01<br>0621 | Up   |
| DNAH7   | 42.522<br>973   | 15.761927   | 69.28401899 | 4.3956<br>56634 | 2.136078<br>695      | 0.00<br>0709 | 0.01<br>0092 | Up   |
| DNAJB13 | 7.7024<br>08991 | 1.272521227 | 14.13229675 | 11.105<br>74539 | 3.473234<br>321      | 0.02<br>1218 | 0.12<br>7025 | Up   |
| DNAJB4  | 1780.5<br>33134 | 3120.286777 | 440.7794913 | 0.1412<br>62494 | -<br>2.823549<br>625 | 0.03<br>3729 | 0.17<br>4906 | Down |

|         |                 |             |             |                 |                      |              |              |          |
|---------|-----------------|-------------|-------------|-----------------|----------------------|--------------|--------------|----------|
| DNAJB5  | 417.27<br>3273  | 687.7085466 | 146.8379994 | 0.2135<br>17776 | -<br>2.227571<br>912 | 0.04<br>0069 | 0.19<br>5971 | Dow<br>n |
| DNAJB9  | 928.41<br>32997 | 1246.039392 | 610.7872076 | 0.4901<br>82904 | -<br>1.028607<br>926 | 0.00<br>3284 | 0.03<br>254  | Dow<br>n |
| DNAJC6  | 258.12<br>98365 | 51.19983442 | 465.0598386 | 9.0832<br>29349 | 3.183205<br>308      | 1.57<br>E-13 | 2.66<br>E-11 | Up       |
| DNAL4   | 114.85<br>18018 | 75.58424893 | 154.1193547 | 2.0390<br>40632 | 1.027890<br>524      | 0.02<br>5212 | 0.14<br>3124 | Up       |
| DNER    | 172.60<br>24471 | 95.15764946 | 250.0472446 | 2.6277<br>15649 | 1.393809<br>167      | 0.01<br>7177 | 0.10<br>9115 | Up       |
| DNM3    | 238.67<br>43634 | 351.0705551 | 126.2781716 | 0.3596<br>94568 | -<br>1.475155<br>723 | 0.00<br>0228 | 0.00<br>4078 | Dow<br>n |
| DOCK11  | 400.85<br>50095 | 540.3639103 | 261.3461088 | 0.4836<br>48341 | -<br>1.047969<br>645 | 0.00<br>5395 | 0.04<br>7109 | Dow<br>n |
| DOCK2   | 386.29<br>58766 | 228.3428464 | 544.2489068 | 2.3834<br>72552 | 1.253065<br>011      | 0.00<br>0717 | 0.01<br>0152 | Up       |
| DOCK3   | 222.52<br>06209 | 129.1366608 | 315.904581  | 2.4462<br>81165 | 1.290590<br>231      | 0.00<br>1407 | 0.01<br>7231 | Up       |
| DOCK5   | 643.22<br>03267 | 369.8403268 | 916.6003267 | 2.4783<br>67718 | 1.309390<br>257      | 0.00<br>0305 | 0.00<br>5144 | Up       |
| DOCK9   | 2737.6<br>76399 | 3716.848987 | 1758.50381  | 0.4731<br>1683  | -<br>1.079731<br>613 | 0.00<br>1724 | 0.01<br>9974 | Dow<br>n |
| DOK6    | 219.59<br>41551 | 330.4454709 | 108.7428393 | 0.3290<br>79527 | -<br>1.603491<br>82  | 0.00<br>0144 | 0.00<br>2782 | Dow<br>n |
| DPT     | 4857.9<br>22138 | 8446.90463  | 1268.939647 | 0.1502<br>25402 | -<br>2.734799<br>308 | 0.00<br>1739 | 0.02<br>0122 | Dow<br>n |
| DPY19L2 | 47.309<br>43755 | 80.76127827 | 13.85759683 | 0.1715<br>87141 | -<br>2.542986<br>657 | 0.04<br>8594 | 0.22<br>4543 | Dow<br>n |
| DRC1    | 35.464<br>53256 | 6.190415211 | 64.73864991 | 10.457<br>88492 | 3.386519<br>195      | 3.60<br>E-06 | 0.00<br>0123 | Up       |
| DRP2    | 19.230<br>26294 | 32.39663352 | 6.063892355 | 0.1871<br>7662  | -<br>2.417527<br>855 | 0.00<br>6047 | 0.05<br>1131 | Dow<br>n |
| DSCAML1 | 19.109<br>85265 | 5.6613776   | 32.5583277  | 5.7509<br>54979 | 2.523801<br>544      | 0.00<br>5275 | 0.04<br>6307 | Up       |
| DSE     | 889.85          | 1309.442435 | 470.2643591 | 0.3591          | -                    | 0.00         | 0.00         | Dow      |

|          |                 |             |             |                 |                      |              |              |          |
|----------|-----------------|-------------|-------------|-----------------|----------------------|--------------|--------------|----------|
|          | 3397            |             |             | 33282           | 1.477408<br>737      | 026          | 4534         | n        |
| DSEL     | 1061.1<br>3355  | 1669.951259 | 452.3158417 | 0.2708<br>55715 | -<br>1.884403<br>565 | 0.03<br>9367 | 0.19<br>3843 | Dow<br>n |
| DSG2     | 1319.9<br>56959 | 367.5761275 | 2272.33779  | 6.1819<br>51493 | 2.628062<br>334      | 1.79<br>E-12 | 2.46<br>E-10 | Up       |
| DSG3     | 234.08<br>22823 | 68.75103927 | 399.4135254 | 5.8095<br>63457 | 2.538429<br>761      | 3.13<br>E-08 | 1.83<br>E-06 | Up       |
| DSP      | 8156.3<br>41767 | 2218.340475 | 14094.34306 | 6.3535<br>52676 | 2.667563<br>52       | 1.48<br>E-13 | 2.53<br>E-11 | Up       |
| DST      | 10009.<br>78235 | 13374.68242 | 6644.882283 | 0.4968<br>25426 | -<br>1.009189<br>088 | 0.02<br>6846 | 0.14<br>9275 | Dow<br>n |
| DSTN     | 11434.<br>68114 | 19152.28422 | 3717.078068 | 0.1940<br>80143 | -<br>2.365275<br>573 | 0.03<br>1568 | 0.16<br>709  | Dow<br>n |
| DTL      | 153.12<br>20094 | 208.8871342 | 97.35688457 | 0.4660<br>74107 | -<br>1.101368<br>729 | 0.02<br>1688 | 0.12<br>9    | Dow<br>n |
| DTNB     | 904.49<br>69355 | 597.1388789 | 1211.854992 | 2.0294<br>35756 | 1.021078<br>671      | 0.01<br>345  | 0.09<br>172  | Up       |
| DTWD2    | 38.056<br>81736 | 57.54994657 | 18.56368814 | 0.3225<br>66557 | -<br>1.632331<br>222 | 0.01<br>2885 | 0.08<br>8645 | Dow<br>n |
| DUOX1    | 29.015<br>41139 | 5.551326982 | 52.47949581 | 9.4535<br>04717 | 3.240849<br>282      | 4.94<br>E-05 | 0.00<br>1156 | Up       |
| DUOXA1   | 13.210<br>41665 | 1.223970965 | 25.19686234 | 20.586<br>16018 | 4.363602<br>852      | 0.00<br>0446 | 0.00<br>7071 | Up       |
| DUPD1    | 9.0400<br>92468 | 0           | 18.08018494 | Inf             | Inf                  | 0.03<br>0711 | 0.16<br>3844 | Up       |
| DUS1L    | 1538.8<br>66689 | 1007.512234 | 2070.221143 | 2.0547<br>85116 | 1.038987<br>529      | 0.00<br>3265 | 0.03<br>2441 | Up       |
| DUSP22   | 246.33<br>48557 | 156.4071531 | 336.2625584 | 2.1499<br>18029 | 1.104281<br>655      | 0.00<br>5967 | 0.05<br>0673 | Up       |
| DUSP8    | 119.56<br>61297 | 175.7802793 | 63.35197999 | 0.3604<br>04365 | -<br>1.472311<br>609 | 0.00<br>1354 | 0.01<br>6719 | Dow<br>n |
| DYNC1LI2 | 1228.5<br>4589  | 1681.878533 | 775.2132458 | 0.4609<br>21066 | -<br>1.117408<br>39  | 0.00<br>169  | 0.01<br>9652 | Dow<br>n |
| DYNLRB2  | 32.888<br>23339 | 17.63340627 | 48.14306051 | 2.7302<br>18981 | 1.449016<br>669      | 0.03<br>0265 | 0.16<br>237  | Up       |
| DYRK3    | 279.56          | 407.9305465 | 151.2039733 | 0.3706          | -                    | 0.02         | 0.12         | Dow      |

|         |                 |             |             |                 |                      |              |              |          |
|---------|-----------------|-------------|-------------|-----------------|----------------------|--------------|--------------|----------|
|         | 72599           |             |             | 61071           | 1.431827<br>491      | 1159         | 6821         | n        |
| DZIP1   | 1231.8<br>10333 | 1806.964155 | 656.6565113 | 0.3634<br>03175 | -<br>1.460357<br>07  | 0.02<br>5042 | 0.14<br>2453 | Dow<br>n |
| EAF2    | 41.875<br>39339 | 19.06404312 | 64.68674367 | 3.3931<br>28271 | 1.762615<br>97       | 0.00<br>4979 | 0.04<br>4485 | Up       |
| EBF1    | 1117.1<br>25635 | 1802.676311 | 431.5749581 | 0.2394<br>07904 | -<br>2.062457<br>309 | 1.14<br>E-08 | 7.63<br>E-07 | Dow<br>n |
| EBF2    | 294.56<br>54503 | 531.0853824 | 58.04551813 | 0.1092<br>96019 | -<br>3.193687<br>24  | 0.03<br>4898 | 0.17<br>9686 | Dow<br>n |
| ECE2    | 484.62<br>10726 | 675.4093893 | 293.8327558 | 0.4350<br>43931 | -<br>1.200767<br>002 | 0.03<br>7478 | 0.18<br>7364 | Dow<br>n |
| ECEL1   | 16.676<br>04241 | 32.82063579 | 0.531449026 | 0.0161<br>92527 | -<br>5.948528<br>053 | 0.00<br>0877 | 0.01<br>1908 | Dow<br>n |
| ECM1    | 6331.7<br>52344 | 11486.23037 | 1177.27432  | 0.1024<br>94403 | -<br>3.286382<br>971 | 0.00<br>9793 | 0.07<br>2869 | Dow<br>n |
| ECM2    | 9214.7<br>42042 | 15659.61093 | 2769.873157 | 0.1768<br>80075 | -<br>2.499156<br>552 | 0.00<br>1324 | 0.01<br>6447 | Dow<br>n |
| ECSCR   | 1185.7<br>24474 | 1652.562162 | 718.8867863 | 0.4350<br>13461 | -<br>1.200868<br>05  | 0.01<br>1642 | 0.08<br>2269 | Dow<br>n |
| EDAR    | 364.12<br>47966 | 47.50105081 | 680.7485424 | 14.331<br>23122 | 3.841090<br>654      | 3.12<br>E-19 | 1.35<br>E-16 | Up       |
| EDARADD | 14.458<br>1749  | 4.446466666 | 24.46988314 | 5.5032<br>19742 | 2.460275<br>936      | 0.01<br>6769 | 0.10<br>7158 | Up       |
| EFCAB6  | 27.889<br>81089 | 12.50383113 | 43.27579066 | 3.4610<br>02488 | 1.791189<br>979      | 0.01<br>3998 | 0.09<br>4498 | Up       |
| EFEMP1  | 4200.0<br>92948 | 6862.126154 | 1538.059743 | 0.2241<br>37492 | -<br>2.157544<br>106 | 0.00<br>5881 | 0.05<br>0244 | Dow<br>n |
| EFEMP2  | 2835.5<br>51788 | 4733.146777 | 937.9567986 | 0.1981<br>67697 | -<br>2.335206<br>281 | 0.00<br>5265 | 0.04<br>624  | Dow<br>n |
| EFHC1   | 177.99<br>79868 | 117.9895013 | 238.0064722 | 2.0171<br>83475 | 1.012342<br>312      | 0.01<br>541  | 0.10<br>0836 | Up       |
| EFNA3   | 93.072<br>5389  | 20.84070145 | 165.3043763 | 7.9318<br>04826 | 2.987649<br>178      | 1.53<br>E-08 | 9.74<br>E-07 | Up       |

|          |                 |             |             |                 |                      |              |              |      |
|----------|-----------------|-------------|-------------|-----------------|----------------------|--------------|--------------|------|
| EFNA4    | 363.33<br>86862 | 137.4080151 | 589.2693572 | 4.2884<br>64226 | 2.100461<br>086      | 9.71<br>E-08 | 4.99<br>E-06 | Up   |
| EFNB3    | 80.210<br>18488 | 21.80216141 | 138.6182084 | 6.3580<br>03032 | 2.668573<br>704      | 5.40<br>E-07 | 2.36<br>E-05 | Up   |
| EGFL7    | 1258.2<br>93027 | 1889.481124 | 627.1049307 | 0.3318<br>92668 | -<br>1.591211<br>338 | 5.07<br>E-06 | 0.00<br>0168 | Down |
| EHD2     | 9396.1<br>50247 | 13812.05953 | 4980.24096  | 0.3605<br>7193  | -<br>1.471641<br>007 | 1.49<br>E-05 | 0.00<br>0413 | Down |
| EHD4     | 627.37<br>70593 | 917.6520181 | 337.1021005 | 0.3673<br>52868 | -<br>1.444761<br>558 | 5.70<br>E-05 | 0.00<br>131  | Down |
| EHF      | 12999.<br>16307 | 6910.047875 | 19088.27826 | 2.7623<br>94502 | 1.465919<br>368      | 0.01<br>6994 | 0.10<br>8181 | Up   |
| EHMT2    | 2499.9<br>39212 | 1652.497452 | 3347.380971 | 2.0256<br>49702 | 1.018384<br>709      | 0.00<br>3013 | 0.03<br>064  | Up   |
| EID3     | 83.630<br>53377 | 118.2997388 | 48.96132878 | 0.4138<br>75206 | -<br>1.272732<br>27  | 0.01<br>0252 | 0.07<br>5145 | Down |
| EIF4EBP2 | 815.42<br>59334 | 1117.630086 | 513.2217808 | 0.4592<br>05409 | -<br>1.122788<br>459 | 0.00<br>1559 | 0.01<br>8562 | Down |
| ELF3     | 1150.1<br>54975 | 1583.59341  | 716.716539  | 0.4525<br>88735 | -<br>1.143727<br>417 | 0.00<br>1911 | 0.02<br>1588 | Down |
| ELF4     | 1796.9<br>06138 | 2533.737176 | 1060.0751   | 0.4183<br>84002 | -<br>1.257100<br>406 | 0.00<br>0348 | 0.00<br>5775 | Down |
| ELFN2    | 274.70<br>85897 | 135.1541699 | 414.2630094 | 3.0651<br>14526 | 1.615940<br>98       | 5.21<br>E-05 | 0.00<br>1211 | Up   |
| ELL3     | 68.595<br>76824 | 38.93209969 | 98.2594368  | 2.5238<br>66875 | 1.335635<br>816      | 0.01<br>2646 | 0.08<br>7332 | Up   |
| ELMO3    | 1517.4<br>26545 | 367.3854276 | 2667.467662 | 7.2606<br>79008 | 2.860104<br>473      | 1.61<br>E-14 | 3.28<br>E-12 | Up   |
| ELN      | 70263.<br>74576 | 134678.0967 | 5849.394777 | 0.0434<br>32413 | -<br>4.525084<br>068 | 0.01<br>2192 | 0.08<br>5064 | Down |
| ELOVL5   | 665.64<br>26426 | 120.0275454 | 1211.25774  | 10.091<br>49804 | 3.335068<br>448      | 1.68<br>E-17 | 5.09<br>E-15 | Up   |
| ELTD1    | 1587.4<br>71836 | 2263.485656 | 911.458016  | 0.4026<br>78945 | -<br>1.312298<br>055 | 0.00<br>5965 | 0.05<br>0673 | Down |
| EMB      | 377.60          | 133.4869974 | 621.7229661 | 4.6575          | 2.219572             | 0.00         | 0.03         | Up   |

|         |                 |             |             |                 |                      |              |              |      |
|---------|-----------------|-------------|-------------|-----------------|----------------------|--------------|--------------|------|
|         | 49818           |             |             | 54504           | 652                  | 3064         | 0974         |      |
| EMID1   | 676.16<br>13331 | 375.9478546 | 976.3748116 | 2.5971<br>01698 | 1.376902<br>509      | 0.00<br>0182 | 0.00<br>3415 | Up   |
| EMILIN2 | 1668.6<br>04227 | 2841.812407 | 495.3960468 | 0.1743<br>23979 | -<br>2.520157<br>062 | 1.49<br>E-07 | 7.35<br>E-06 | Down |
| EML1    | 391.06<br>18051 | 654.7999323 | 127.3236779 | 0.1944<br>46688 | -<br>2.362553<br>435 | 3.03<br>E-06 | 0.00<br>0106 | Down |
| EML5    | 410.86<br>70644 | 262.0310536 | 559.7030752 | 2.1360<br>18107 | 1.094923<br>877      | 0.00<br>3734 | 0.03<br>5661 | Up   |
| EMP1    | 8092.3<br>35441 | 13854.96661 | 2329.704275 | 0.1681<br>49397 | -<br>2.572184<br>493 | 4.14<br>E-06 | 0.00<br>014  | Down |
| EMP3    | 1755.5<br>97092 | 2730.593624 | 780.6005612 | 0.2858<br>7211  | -<br>1.806558<br>218 | 0.00<br>0192 | 0.00<br>3563 | Down |
| EMX2    | 356.90<br>91521 | 669.3842308 | 44.43407343 | 0.0663<br>8052  | -<br>3.913096<br>255 | 0.01<br>292  | 0.08<br>8817 | Down |
| EN1     | 90.409<br>36588 | 161.9552723 | 18.86345942 | 0.1164<br>73265 | -<br>3.101929<br>249 | 0.02<br>0757 | 0.12<br>4987 | Down |
| ENPP1   | 8008.7<br>87127 | 15245.92685 | 771.6474019 | 0.0506<br>13348 | -<br>4.304338<br>279 | 0.00<br>6996 | 0.05<br>6905 | Down |
| ENPP3   | 210.72<br>26443 | 31.2573274  | 390.1879612 | 12.483<br>08777 | 3.641902<br>932      | 1.28<br>E-15 | 3.18<br>E-13 | Up   |
| ENPP5   | 939.74<br>44179 | 431.1425891 | 1448.346247 | 3.3593<br>20753 | 1.748169<br>553      | 0.00<br>1477 | 0.01<br>7875 | Up   |
| ENTPD2  | 2355.8<br>06832 | 761.2360951 | 3950.37757  | 5.1894<br>24931 | 2.375574<br>674      | 1.60<br>E-11 | 1.96<br>E-09 | Up   |
| ENTPD3  | 44.586<br>99921 | 14.49281058 | 74.68118785 | 5.1529<br>81712 | 2.365407<br>472      | 0.00<br>0209 | 0.00<br>3838 | Up   |
| ENTPD5  | 189.74<br>27713 | 269.6711671 | 109.8143755 | 0.4072<br>15857 | -<br>1.296134<br>353 | 0.00<br>1683 | 0.01<br>9602 | Down |
| EPAS1   | 2476.5<br>85754 | 3640.686522 | 1312.484987 | 0.3605<br>04806 | -<br>1.471909<br>604 | 0.00<br>2413 | 0.02<br>5789 | Down |
| EPCAM   | 3396.5<br>31039 | 845.4072779 | 5947.654801 | 7.0352<br>53843 | 2.814602<br>479      | 1.46<br>E-14 | 3.02<br>E-12 | Up   |
| EPDR1   | 531.26<br>02285 | 955.2341999 | 107.286257  | 0.1123<br>14087 | -<br>3.154389        | 0.00<br>0848 | 0.01<br>164  | Down |



|        |                 |             |             |                 |                      |              |              |      |
|--------|-----------------|-------------|-------------|-----------------|----------------------|--------------|--------------|------|
|        |                 |             |             |                 | 207                  |              |              |      |
| EPHA1  | 518.64<br>20614 | 135.2999542 | 901.9841685 | 6.6665<br>51914 | 2.736940<br>761      | 2.51<br>E-12 | 3.40<br>E-10 | Up   |
| EPHA3  | 258.79<br>27876 | 478.0418089 | 39.54376621 | 0.0827<br>20309 | -<br>3.595614<br>613 | 2.62<br>E-06 | 9.44<br>E-05 | Down |
| EPHA7  | 361.14<br>98489 | 165.4617907 | 556.837907  | 3.3653<br>56465 | 1.750759<br>326      | 8.79<br>E-06 | 0.00<br>0268 | Up   |
| EPHB1  | 89.385<br>52546 | 137.2148518 | 41.5561991  | 0.3028<br>54965 | -<br>1.723301<br>033 | 0.03<br>369  | 0.17<br>4754 | Down |
| EPHB6  | 1373.5<br>43679 | 92.29085405 | 2654.796504 | 28.765<br>54271 | 4.846269<br>784      | 1.70<br>E-32 | 6.18<br>E-29 | Up   |
| EPHX1  | 1562.2<br>74282 | 971.4174042 | 2153.13116  | 2.2164<br>84027 | 1.148272<br>966      | 0.00<br>1062 | 0.01<br>3874 | Up   |
| EPN3   | 246.46<br>13454 | 104.6109999 | 388.3116909 | 3.7119<br>58504 | 1.892180<br>583      | 4.44<br>E-06 | 0.00<br>0149 | Up   |
| EPPK1  | 301.92<br>33379 | 156.8496351 | 446.9970407 | 2.8498<br>44313 | 1.510883<br>107      | 0.00<br>0124 | 0.00<br>2466 | Up   |
| EPS8L1 | 740.26<br>94131 | 172.0565068 | 1308.482319 | 7.6049<br>56905 | 2.926940<br>073      | 3.72<br>E-14 | 6.89<br>E-12 | Up   |
| EPS8L2 | 471.98<br>56433 | 278.9562459 | 665.0150406 | 2.3839<br>40315 | 1.253348<br>116      | 0.00<br>0885 | 0.01<br>1998 | Up   |
| EQTN   | 37.278<br>8715  | 19.4372447  | 55.1204983  | 2.8358<br>1851  | 1.503765<br>204      | 0.02<br>1919 | 0.12<br>9892 | Up   |
| ERBB2  | 4288.2<br>93219 | 1924.367421 | 6652.219018 | 3.4568<br>34151 | 1.789451<br>389      | 3.42<br>E-07 | 1.55<br>E-05 | Up   |
| ERBB3  | 4529.3<br>76616 | 980.5247807 | 8078.228452 | 8.2386<br>78522 | 3.042412<br>949      | 2.04<br>E-13 | 3.42<br>E-11 | Up   |
| ERBB4  | 93.095<br>25796 | 29.37225808 | 156.8182578 | 5.3389<br>92235 | 2.416567<br>451      | 7.00<br>E-05 | 0.00<br>1556 | Up   |
| EREG   | 34.324<br>26275 | 3.764483404 | 64.8840421  | 17.235<br>84225 | 4.107339<br>894      | 1.68<br>E-07 | 8.16<br>E-06 | Up   |
| ERG    | 957.01<br>40219 | 1325.530107 | 588.4979363 | 0.4439<br>71761 | -<br>1.171460<br>178 | 0.00<br>0875 | 0.01<br>1906 | Down |
| ERICH3 | 154.25<br>99286 | 207.0974674 | 101.4223898 | 0.4897<br>32642 | -<br>1.029933<br>737 | 0.01<br>6764 | 0.10<br>7158 | Down |
| ERN2   | 85.603<br>97728 | 10.96201845 | 160.2459361 | 14.618<br>28739 | 3.869702<br>397      | 0.00<br>2479 | 0.02<br>626  | Up   |
| ESM1   | 174.60<br>79125 | 108.0123415 | 241.2034835 | 2.2331<br>10404 | 1.159054<br>579      | 0.00<br>7514 | 0.06<br>0308 | Up   |
| ESRP1  | 949.35          | 461.3589217 | 1437.353124 | 3.1154          | 1.639453             | 0.00         | 0.04         | Up   |

|         |                 |             |             |                 |                      |              |              |      |
|---------|-----------------|-------------|-------------|-----------------|----------------------|--------------|--------------|------|
|         | 60227           |             |             | 77032           | 081                  | 4911         | 3988         |      |
| ESRP2   | 1355.2<br>41815 | 537.4714427 | 2173.012188 | 4.0430<br>28178 | 2.015436<br>258      | 1.56<br>E-05 | 0.00<br>043  | Up   |
| ESRRB   | 202.96<br>23864 | 38.62155284 | 367.30322   | 9.5103<br>17247 | 3.249493<br>468      | 7.01<br>E-13 | 1.08<br>E-10 | Up   |
| ESRRG   | 409.95<br>07708 | 124.2364016 | 695.66514   | 5.5995<br>27443 | 2.485305<br>08       | 4.32<br>E-07 | 1.92<br>E-05 | Up   |
| ESYT3   | 18.245<br>12007 | 4.397916403 | 32.09232374 | 7.2971<br>65476 | 2.867336<br>17       | 0.00<br>2558 | 0.02<br>6933 | Up   |
| ETNK2   | 600.07<br>08625 | 218.2539582 | 981.8877667 | 4.4988<br>31428 | 2.169550<br>31       | 1.21<br>E-08 | 7.98<br>E-07 | Up   |
| ETV4    | 264.30<br>31233 | 116.6621055 | 411.9441411 | 3.5310<br>87832 | 1.820112<br>707      | 4.59<br>E-06 | 0.00<br>0153 | Up   |
| ETV5    | 591.69<br>1093  | 295.7137481 | 887.668438  | 3.0017<br>82784 | 1.585819<br>584      | 1.78<br>E-05 | 0.00<br>0486 | Up   |
| EVA1C   | 265.87<br>88142 | 170.0373906 | 361.7202378 | 2.1272<br>98217 | 1.089022<br>293      | 0.00<br>5908 | 0.05<br>0418 | Up   |
| EVC     | 567.25<br>56412 | 766.9846264 | 367.5266559 | 0.4791<br>83863 | -<br>1.061348<br>771 | 0.00<br>7127 | 0.05<br>7583 | Down |
| EXOC3L4 | 127.90<br>10316 | 38.58303313 | 217.21903   | 5.6299<br>10672 | 2.493112<br>032      | 1.28<br>E-07 | 6.35<br>E-06 | Up   |
| EXTL2   | 294.57<br>77931 | 426.5931076 | 162.5624787 | 0.3810<br>71508 | -<br>1.391866<br>351 | 0.02<br>1302 | 0.12<br>7255 | Down |
| EYA2    | 220.31<br>43675 | 58.47048967 | 382.1582453 | 6.5359<br>16622 | 2.708389<br>579      | 3.49<br>E-10 | 3.28<br>E-08 | Up   |
| EYA4    | 101.86<br>01743 | 44.72794315 | 158.9924054 | 3.5546<br>5497  | 1.829709<br>533      | 0.01<br>0551 | 0.07<br>687  | Up   |
| EZR     | 8718.1<br>7982  | 5546.060072 | 11890.29957 | 2.1439<br>18279 | 1.100249<br>915      | 0.00<br>137  | 0.01<br>688  | Up   |
| F11     | 8.0630<br>58903 | 1.567227603 | 14.5588902  | 9.2895<br>82556 | 3.215613<br>768      | 0.02<br>7391 | 0.15<br>1335 | Up   |
| F13A1   | 1004.7<br>01656 | 1819.286981 | 190.1163309 | 0.1045<br>00462 | -<br>3.258418<br>768 | 0.01<br>8646 | 0.11<br>596  | Down |
| F2RL2   | 617.19<br>82699 | 833.9972797 | 400.39926   | 0.4800<br>96602 | -<br>1.058603<br>37  | 0.00<br>363  | 0.03<br>4958 | Down |
| F8      | 786.71<br>54946 | 1168.641409 | 404.7895802 | 0.3463<br>76208 | -<br>1.529588<br>256 | 2.06<br>E-05 | 0.00<br>0553 | Down |
| FABP4   | 5441.2<br>61694 | 10153.16107 | 729.3623154 | 0.0718<br>35984 | -<br>3.799149        | 0.02<br>9462 | 0.15<br>9382 | Down |

|          |                 |             |             |                 |                      |              |              |          |
|----------|-----------------|-------------|-------------|-----------------|----------------------|--------------|--------------|----------|
|          |                 |             |             |                 | 493                  |              |              |          |
| FADS1    | 694.81<br>01472 | 1165.295049 | 224.3252456 | 0.1925<br>05105 | -<br>2.377031<br>391 | 0.01<br>3217 | 0.09<br>0312 | Dow<br>n |
| FAIM     | 257.29<br>07857 | 146.5679603 | 368.013611  | 2.5108<br>73524 | 1.328189<br>36       | 0.00<br>0866 | 0.01<br>1798 | Up       |
| FAIM2    | 142.51<br>83364 | 87.47264159 | 197.5640312 | 2.2585<br>80827 | 1.175416<br>544      | 0.00<br>9054 | 0.06<br>9063 | Up       |
| FAM102B  | 880.47<br>89986 | 1267.710063 | 493.2479338 | 0.3890<br>8576  | -<br>1.361839<br>913 | 0.00<br>0164 | 0.00<br>3133 | Dow<br>n |
| FAM105A  | 2852.0<br>36394 | 4530.427579 | 1173.645209 | 0.2590<br>58376 | -<br>1.948650<br>867 | 0.02<br>9387 | 0.15<br>9213 | Dow<br>n |
| FAM109B  | 750.35<br>43365 | 1188.318144 | 312.3905294 | 0.2628<br>84591 | -<br>1.927498<br>513 | 9.01<br>E-05 | 0.00<br>1914 | Dow<br>n |
| FAM110A  | 399.75<br>79443 | 191.2583914 | 608.2574973 | 3.1802<br>91818 | 1.669159<br>151      | 2.87<br>E-05 | 0.00<br>0732 | Up       |
| FAM110D  | 272.91<br>00228 | 397.6482228 | 148.1718228 | 0.3726<br>20357 | -<br>1.424221<br>601 | 0.00<br>7046 | 0.05<br>7205 | Dow<br>n |
| FAM114A1 | 2163.4<br>61364 | 3034.598673 | 1292.324056 | 0.4258<br>63251 | -<br>1.231537<br>855 | 0.00<br>0451 | 0.00<br>7112 | Dow<br>n |
| FAM115C  | 252.97<br>42562 | 157.3317038 | 348.6168085 | 2.2158<br>07749 | 1.147832<br>714      | 0.00<br>3664 | 0.03<br>518  | Up       |
| FAM124A  | 23.520<br>57292 | 40.0159204  | 7.025225435 | 0.1755<br>60761 | -<br>2.509957<br>667 | 0.00<br>1479 | 0.01<br>7875 | Dow<br>n |
| FAM126A  | 1093.8<br>1506  | 1510.431847 | 677.1982728 | 0.4483<br>47454 | -<br>1.157310<br>89  | 0.00<br>1165 | 0.01<br>4868 | Dow<br>n |
| FAM131C  | 55.481<br>83213 | 8.795832806 | 102.1678315 | 11.615<br>4813  | 3.537977<br>03       | 2.79<br>E-08 | 1.64<br>E-06 | Up       |
| FAM132A  | 26.912<br>56793 | 6.947488873 | 46.87764698 | 6.7474<br>23111 | 2.754336<br>632      | 0.00<br>0501 | 0.00<br>7717 | Up       |
| FAM149A  | 383.12<br>44671 | 189.4122899 | 576.8366442 | 3.0454<br>0241  | 1.606632<br>874      | 2.75<br>E-05 | 0.00<br>0707 | Up       |
| FAM160A1 | 703.39<br>4531  | 417.3229049 | 989.4661571 | 2.3709<br>84544 | 1.245486<br>258      | 0.02<br>8094 | 0.15<br>4    | Up       |
| FAM160B1 | 275.36<br>20006 | 380.718216  | 170.0057852 | 0.4465<br>39667 | -<br>1.163139<br>758 | 0.00<br>3316 | 0.03<br>2737 | Dow<br>n |

|          |                 |             |             |                 |                      |              |              |          |
|----------|-----------------|-------------|-------------|-----------------|----------------------|--------------|--------------|----------|
| FAM162B  | 43.585<br>29387 | 60.91082735 | 26.25976039 | 0.4311<br>18104 | -<br>1.213844<br>948 | 0.03<br>8004 | 0.18<br>8927 | Dow<br>n |
| FAM163A  | 26.777<br>04588 | 4.103210027 | 49.45088174 | 12.051<br>75495 | 3.591171<br>338      | 1.73<br>E-05 | 0.00<br>0472 | Up       |
| FAM167A  | 68.492<br>22659 | 36.87143464 | 100.1130185 | 2.7151<br>91842 | 1.441054<br>135      | 0.00<br>7405 | 0.05<br>9515 | Up       |
| FAM167B  | 79.967<br>7253  | 114.2750531 | 45.66039752 | 0.3995<br>65752 | -<br>1.323495<br>164 | 0.00<br>7383 | 0.05<br>9441 | Dow<br>n |
| FAM169A  | 377.52<br>16496 | 206.2657082 | 548.7775911 | 2.6605<br>37207 | 1.411717<br>579      | 0.00<br>8765 | 0.06<br>7312 | Up       |
| FAM171A1 | 1035.1<br>00636 | 1469.350849 | 600.8504229 | 0.4089<br>22364 | -<br>1.290101<br>128 | 0.00<br>0286 | 0.00<br>4885 | Dow<br>n |
| FAM179A  | 25.520<br>98892 | 1.175420702 | 49.86655714 | 42.424<br>43326 | 5.406823<br>482      | 9.21<br>E-08 | 4.75<br>E-06 | Up       |
| FAM180B  | 227.43<br>21136 | 426.4050391 | 28.45918814 | 0.0667<br>42148 | -<br>3.905258<br>076 | 0.00<br>1844 | 0.02<br>0993 | Dow<br>n |
| FAM184A  | 148.54<br>6798  | 38.1117605  | 258.9818355 | 6.7953<br>25959 | 2.764542<br>756      | 2.84<br>E-09 | 2.20<br>E-07 | Up       |
| FAM184B  | 89.055<br>36659 | 51.49174679 | 126.6189864 | 2.4590<br>15168 | 1.298080<br>634      | 0.00<br>6679 | 0.05<br>4934 | Up       |
| FAM186B  | 64.088<br>77026 | 34.64471916 | 93.53282135 | 2.6997<br>71382 | 1.432837<br>245      | 0.00<br>7836 | 0.06<br>2015 | Up       |
| FAM189A2 | 521.42<br>27295 | 289.1250168 | 753.7204422 | 2.6069<br>01507 | 1.382336<br>077      | 0.00<br>7661 | 0.06<br>1113 | Up       |
| FAM195A  | 347.41<br>22209 | 195.9157154 | 498.9087264 | 2.5465<br>4776  | 1.348542<br>775      | 0.00<br>0538 | 0.00<br>8144 | Up       |
| FAM196B  | 10.038<br>9717  | 20.0779434  | 0           | 0               | #NAME?               | 0.00<br>0523 | 0.00<br>7986 | Dow<br>n |
| FAM198B  | 366.97<br>76057 | 539.6156502 | 194.3395612 | 0.3601<br>44412 | -<br>1.473352<br>574 | 0.01<br>0327 | 0.07<br>56   | Dow<br>n |
| FAM214B  | 800.32<br>97759 | 1070.571405 | 530.0881468 | 0.4951<br>45064 | -<br>1.014076<br>837 | 0.00<br>4216 | 0.03<br>9072 | Dow<br>n |
| FAM217A  | 12.824<br>51796 | 3.178475453 | 22.47056046 | 7.0696<br>0327  | 2.821629<br>257      | 0.01<br>1324 | 0.08<br>053  | Up       |
| FAM227A  | 41.316<br>98886 | 19.18768378 | 63.44629394 | 3.3066<br>15569 | 1.725355<br>326      | 0.00<br>5343 | 0.04<br>6767 | Up       |
| FAM26F   | 76.746<br>80583 | 26.5426945  | 126.9509172 | 4.7828<br>94863 | 2.257884<br>078      | 2.10<br>E-05 | 0.00<br>0561 | Up       |

|        |                 |             |             |                 |                      |              |              |      |
|--------|-----------------|-------------|-------------|-----------------|----------------------|--------------|--------------|------|
| FAM3B  | 790.22<br>80613 | 60.80582116 | 1519.650301 | 24.991<br>85559 | 4.643386<br>117      | 8.66<br>E-07 | 3.54<br>E-05 | Up   |
| FAM43A | 983.13<br>46179 | 1335.028139 | 631.2410965 | 0.4728<br>29806 | -<br>1.080607<br>112 | 0.00<br>204  | 0.02<br>2656 | Down |
| FAM46A | 3601.1<br>07454 | 5718.807751 | 1483.407157 | 0.2593<br>90982 | -<br>1.946799<br>773 | 1.42<br>E-07 | 7.03<br>E-06 | Down |
| FAM46B | 643.15<br>82806 | 1029.749913 | 256.5666484 | 0.2491<br>54329 | -<br>2.004888<br>455 | 0.02<br>1222 | 0.12<br>7025 | Down |
| FAM46C | 197.34<br>48838 | 279.4408744 | 115.2488932 | 0.4124<br>26756 | -<br>1.277790<br>167 | 0.00<br>5136 | 0.04<br>5495 | Down |
| FAM53A | 8.0695<br>31531 | 15.38872542 | 0.750337638 | 0.0487<br>5892  | -<br>4.358190<br>007 | 0.01<br>1321 | 0.08<br>053  | Down |
| FAM60A | 691.62<br>7728  | 388.7908976 | 994.4645583 | 2.5578<br>39097 | 1.354925<br>513      | 0.00<br>0203 | 0.00<br>3744 | Up   |
| FAM64A | 123.89<br>99066 | 176.1436554 | 71.65615779 | 0.4068<br>05216 | -<br>1.297589<br>917 | 0.00<br>542  | 0.04<br>7171 | Down |
| FAM69A | 446.46<br>85409 | 655.3634157 | 237.5736661 | 0.3625<br>06757 | -<br>1.463920<br>21  | 0.00<br>1179 | 0.01<br>5015 | Down |
| FAM69B | 169.00<br>65618 | 106.3492641 | 231.6638595 | 2.1783<br>3063  | 1.123222<br>945      | 0.00<br>8541 | 0.06<br>6013 | Up   |
| FAM73A | 455.35<br>51537 | 690.5758637 | 220.1344437 | 0.3187<br>69385 | -<br>1.649415<br>015 | 0.00<br>0835 | 0.01<br>1515 | Down |
| FAM83B | 63.046<br>76577 | 16.6099607  | 109.4835708 | 6.5914<br>40692 | 2.720593<br>83       | 3.11<br>E-06 | 0.00<br>0109 | Up   |
| FAM83E | 6.7573<br>80366 | 0.413817024 | 13.10094371 | 31.658<br>7838  | 4.984533<br>929      | 0.00<br>8183 | 0.06<br>4091 | Up   |
| FAM83G | 176.91<br>12537 | 85.71477243 | 268.107735  | 3.1279<br>05814 | 1.645197<br>072      | 0.00<br>0166 | 0.00<br>3155 | Up   |
| FAM83H | 1049.2<br>95686 | 514.3055791 | 1584.285793 | 3.0804<br>36724 | 1.623134<br>901      | 9.59<br>E-06 | 0.00<br>0288 | Up   |
| FAM84A | 557.03<br>25611 | 220.1007669 | 893.9643553 | 4.0616<br>13996 | 2.022053<br>136      | 0.00<br>0167 | 0.00<br>317  | Up   |
| FAM8A1 | 250.57<br>88571 | 364.523712  | 136.6340022 | 0.3748<br>28846 | -<br>1.415696<br>112 | 0.00<br>0388 | 0.00<br>6297 | Down |
| FAM98C | 195.83          | 117.3659733 | 274.2974863 | 2.3371          | 1.224727             | 0.00         | 0.03         | Up   |

|        |                 |             |             |                 |                      |              |              |      |
|--------|-----------------|-------------|-------------|-----------------|----------------------|--------------|--------------|------|
|        | 17298           |             |             | 12526           | 198                  | 3095         | 1215         |      |
| FANK1  | 57.867<br>19923 | 21.54694527 | 94.1874532  | 4.3712<br>67112 | 2.128051<br>538      | 0.00<br>0179 | 0.00<br>3377 | Up   |
| FAP    | 676.28<br>00134 | 1167.754816 | 184.8052111 | 0.1582<br>56861 | -<br>2.659660<br>051 | 0.00<br>4011 | 0.03<br>7473 | Down |
| FAR2   | 269.23<br>72936 | 390.8995233 | 147.5750639 | 0.3775<br>26845 | -<br>1.405348<br>859 | 0.03<br>5497 | 0.18<br>1281 | Down |
| FASLG  | 81.724<br>19995 | 50.15887958 | 113.2895203 | 2.2586<br>13455 | 1.175437<br>386      | 0.01<br>9434 | 0.11<br>8917 | Up   |
| FAT2   | 941.21<br>264   | 251.4871683 | 1630.938112 | 6.4851<br>74265 | 2.697145<br>342      | 9.76<br>E-13 | 1.48<br>E-10 | Up   |
| FAT4   | 1556.4<br>30005 | 2496.535035 | 616.3249756 | 0.2468<br>72152 | -<br>2.018163<br>993 | 0.00<br>0109 | 0.00<br>2203 | Down |
| FBLN1  | 16080.<br>92263 | 22887.94076 | 9273.904505 | 0.4051<br>87369 | -<br>1.303338<br>893 | 0.00<br>0519 | 0.00<br>7943 | Down |
| FBLN2  | 10114.<br>77037 | 16681.4288  | 3548.11194  | 0.2126<br>98324 | -<br>2.233119<br>433 | 0.00<br>2209 | 0.02<br>4118 | Down |
| FBLN5  | 3151.2<br>60194 | 4474.53997  | 1827.980419 | 0.4085<br>29241 | -<br>1.291488<br>749 | 0.00<br>763  | 0.06<br>0994 | Down |
| FBN1   | 33065.<br>85107 | 60374.10968 | 5757.592464 | 0.0953<br>65257 | -<br>3.390392<br>429 | 0.00<br>0194 | 0.00<br>3603 | Down |
| FBN2   | 155.17<br>53211 | 236.5655329 | 73.78510927 | 0.3119<br>01351 | -<br>1.680838<br>294 | 0.04<br>6305 | 0.21<br>6723 | Down |
| FBN3   | 28.163<br>16746 | 10.47311103 | 45.85322389 | 4.3781<br>85601 | 2.130333<br>115      | 0.00<br>6905 | 0.05<br>6314 | Up   |
| FBXL6  | 495.72<br>89411 | 313.9484132 | 677.509469  | 2.1580<br>28009 | 1.109713<br>59       | 0.00<br>2699 | 0.02<br>8035 | Up   |
| FBXL7  | 967.31<br>12052 | 1440.115881 | 494.5065296 | 0.3433<br>7968  | -<br>1.542123<br>429 | 0.00<br>0876 | 0.01<br>1906 | Down |
| FBXL8  | 106.40<br>38206 | 150.6325923 | 62.17504891 | 0.4127<br>59602 | -<br>1.276626<br>317 | 0.03<br>1202 | 0.16<br>5827 | Down |
| FBXO17 | 153.68<br>44863 | 221.3155824 | 86.05339021 | 0.3888<br>26622 | -<br>1.362801<br>096 | 0.00<br>1618 | 0.01<br>9006 | Down |

|        |                 |             |             |                 |                      |              |              |          |
|--------|-----------------|-------------|-------------|-----------------|----------------------|--------------|--------------|----------|
| FBXO28 | 318.22<br>58527 | 450.3850934 | 186.066612  | 0.4131<br>27821 | -<br>1.275339<br>879 | 0.00<br>4394 | 0.04<br>0285 | Dow<br>n |
| FBXO30 | 521.17<br>62254 | 785.2790728 | 257.073378  | 0.3273<br>65629 | -<br>1.611025<br>236 | 0.00<br>3718 | 0.03<br>5597 | Dow<br>n |
| FBXW9  | 226.53<br>14699 | 125.5149378 | 327.5480021 | 2.6096<br>33626 | 1.383847<br>277      | 0.00<br>0675 | 0.00<br>9678 | Up       |
| FCER1A | 51.145<br>73873 | 82.29445787 | 19.99701959 | 0.2429<br>93515 | -<br>2.041010<br>283 | 0.00<br>5152 | 0.04<br>5561 | Dow<br>n |
| FCGR1A | 165.31<br>04818 | 96.81511765 | 233.805846  | 2.4149<br>72493 | 1.272006<br>756      | 0.00<br>2645 | 0.02<br>7578 | Up       |
| FCGR2A | 219.75<br>02573 | 347.0930391 | 92.40747543 | 0.2662<br>3258  | -<br>1.909240<br>962 | 3.05<br>E-06 | 0.00<br>0107 | Dow<br>n |
| FCHO1  | 145.83<br>04083 | 72.43082867 | 219.229988  | 3.0267<br>49687 | 1.597769<br>369      | 0.00<br>0266 | 0.00<br>4619 | Up       |
| FER1L6 | 32.574<br>54024 | 15.65753161 | 49.49154886 | 3.1608<br>78105 | 1.660325<br>401      | 0.01<br>364  | 0.09<br>2642 | Up       |
| FERMT2 | 4620.3<br>90593 | 7498.596129 | 1742.185057 | 0.2323<br>3483  | -<br>2.105722<br>646 | 0.00<br>1787 | 0.02<br>052  | Dow<br>n |
| FGD5   | 1421.5<br>97648 | 2089.836079 | 753.3592172 | 0.3604<br>87229 | -<br>1.471979<br>945 | 2.59<br>E-05 | 0.00<br>0671 | Dow<br>n |
| FGF10  | 26.537<br>48204 | 44.294697   | 8.780267078 | 0.1982<br>23888 | -<br>2.334797<br>259 | 0.04<br>0049 | 0.19<br>5971 | Dow<br>n |
| FGF12  | 122.14<br>13048 | 167.7167744 | 76.56583535 | 0.4565<br>1865  | -<br>1.131254<br>297 | 0.01<br>0354 | 0.07<br>5768 | Dow<br>n |
| FGF16  | 16.982<br>77819 | 32.89508623 | 1.07047015  | 0.0325<br>41947 | -<br>4.941555<br>623 | 0.00<br>3336 | 0.03<br>2884 | Dow<br>n |
| FGF18  | 34.660<br>72768 | 66.04334321 | 3.278112139 | 0.0496<br>35769 | -<br>4.332476<br>041 | 0.03<br>1374 | 0.16<br>6441 | Dow<br>n |
| FGFR3  | 64.009<br>2234  | 15.07428851 | 112.9441583 | 7.4925<br>03424 | 2.905447<br>838      | 5.12<br>E-07 | 2.25<br>E-05 | Up       |
| FGFR4  | 134.59<br>94354 | 20.31667912 | 248.8821917 | 12.250<br>14139 | 3.614726<br>495      | 3.56<br>E-13 | 5.81<br>E-11 | Up       |
| FGL1   | 1629.5<br>63579 | 861.4742992 | 2397.652859 | 2.7831<br>97202 | 1.476743<br>134      | 0.00<br>0444 | 0.00<br>7046 | Up       |

|         |                 |             |             |                 |                      |              |              |          |
|---------|-----------------|-------------|-------------|-----------------|----------------------|--------------|--------------|----------|
| FGL2    | 2183.6<br>13941 | 3504.361367 | 862.866515  | 0.2462<br>26466 | -<br>2.021942<br>255 | 0.04<br>9866 | 0.22<br>7982 | Dow<br>n |
| FHAD1   | 66.699<br>07059 | 22.66652084 | 110.7316203 | 4.8852<br>49973 | 2.288432<br>385      | 2.63<br>E-05 | 0.00<br>0679 | Up       |
| FHDC1   | 388.05<br>37852 | 534.72809   | 241.3794804 | 0.4514<br>06023 | -<br>1.147502<br>427 | 0.00<br>284  | 0.02<br>9191 | Dow<br>n |
| FHL1    | 12549.<br>21655 | 21299.98402 | 3798.449073 | 0.1783<br>31076 | -<br>2.487369<br>965 | 0.00<br>3769 | 0.03<br>5882 | Dow<br>n |
| FHL5    | 374.40<br>16559 | 611.8013894 | 137.0019224 | 0.2239<br>32022 | -<br>2.158867<br>247 | 0.00<br>3779 | 0.03<br>5925 | Dow<br>n |
| FIBIN   | 166.08<br>79816 | 262.2021786 | 69.97378457 | 0.2668<br>69577 | -<br>1.905793<br>245 | 0.00<br>9274 | 0.07<br>0092 | Dow<br>n |
| FIGF    | 747.80<br>36128 | 1427.530584 | 68.07664134 | 0.0476<br>88394 | -<br>4.390217<br>984 | 0.01<br>3657 | 0.09<br>2694 | Dow<br>n |
| FILIP1  | 1300.9<br>5     | 1818.131022 | 783.7689786 | 0.4310<br>84982 | -<br>1.213955<br>792 | 0.00<br>069  | 0.00<br>9871 | Dow<br>n |
| FILIP1L | 4097.2<br>8527  | 7114.26388  | 1080.30666  | 0.1518<br>508   | -<br>2.719273<br>588 | 0.00<br>3546 | 0.03<br>4389 | Dow<br>n |
| FKBP10  | 3325.1<br>37794 | 5567.678905 | 1082.596682 | 0.1944<br>43089 | -<br>2.362580<br>14  | 0.00<br>0448 | 0.00<br>7092 | Dow<br>n |
| FKBP14  | 1057.3<br>43175 | 1668.115394 | 446.5709557 | 0.2677<br>0987  | -<br>1.901257<br>764 | 1.27<br>E-07 | 6.30<br>E-06 | Dow<br>n |
| FKBP4   | 5330.5<br>77722 | 3368.068262 | 7293.087183 | 2.1653<br>62046 | 1.114608<br>262      | 0.00<br>1087 | 0.01<br>4118 | Up       |
| FKBP7   | 1134.0<br>13536 | 1928.22786  | 339.7992124 | 0.1762<br>23578 | -<br>2.504521<br>132 | 0.00<br>225  | 0.02<br>4459 | Dow<br>n |
| FKBP9   | 4737.9<br>34936 | 6728.22109  | 2747.648782 | 0.4083<br>76708 | -<br>1.292027<br>51  | 0.00<br>4906 | 0.04<br>3967 | Dow<br>n |
| FKTN    | 75.658<br>52763 | 112.1449237 | 39.17213155 | 0.3492<br>99195 | -<br>1.517464<br>778 | 0.00<br>3493 | 0.03<br>4039 | Dow<br>n |
| FLNC    | 12234.          | 21971.65109 | 2497.14185  | 0.1136          | -                    | 0.02         | 0.13         | Dow      |



|        |                 |             |             |                 |                      |              |              |          |
|--------|-----------------|-------------|-------------|-----------------|----------------------|--------------|--------------|----------|
|        | 39647           |             |             | 52899           | 3.137293<br>606      | 3621         | 6923         | n        |
| FLRT2  | 2132.9<br>93935 | 3317.253504 | 948.7343654 | 0.2859<br>99959 | -<br>1.805913<br>156 | 0.00<br>0298 | 0.00<br>5052 | Dow<br>n |
| FLT4   | 962.25<br>39518 | 1581.372012 | 343.1358919 | 0.2169<br>86193 | -<br>2.204324<br>852 | 0.00<br>0102 | 0.00<br>2095 | Dow<br>n |
| FMO1   | 99.103<br>11768 | 9.091024443 | 189.1152109 | 20.802<br>40924 | 4.378678<br>72       | 7.67<br>E-15 | 1.68<br>E-12 | Up       |
| FMO2   | 12.080<br>09262 | 3.394686627 | 20.76549862 | 6.1170<br>5907  | 2.612838<br>208      | 0.01<br>8828 | 0.11<br>6626 | Up       |
| FMO4   | 823.03<br>90544 | 306.2555208 | 1339.822588 | 4.3748<br>52033 | 2.129234<br>223      | 5.91<br>E-09 | 4.26<br>E-07 | Up       |
| FMO5   | 1687.1<br>04337 | 823.5818213 | 2550.626853 | 3.0969<br>92657 | 1.630867<br>963      | 0.00<br>9547 | 0.07<br>1565 | Up       |
| FMOD   | 12503.<br>54574 | 20220.09005 | 4787.001435 | 0.2367<br>44813 | -<br>2.078595<br>279 | 0.02<br>1068 | 0.12<br>6391 | Dow<br>n |
| FN1    | 114508<br>.6026 | 210369.7843 | 18647.42099 | 0.0886<br>41157 | -<br>3.495879<br>484 | 0.00<br>558  | 0.04<br>8125 | Dow<br>n |
| FNDC3B | 3389.8<br>72329 | 4890.07216  | 1889.672497 | 0.3864<br>30391 | -<br>1.371719<br>535 | 8.89<br>E-05 | 0.00<br>1896 | Dow<br>n |
| FOLH1B | 2430.6<br>96852 | 1366.294033 | 3495.099672 | 2.5580<br>87489 | 1.355065<br>607      | 0.00<br>0559 | 0.00<br>8385 | Up       |
| FOSL2  | 5945.4<br>11011 | 9036.611539 | 2854.210482 | 0.3158<br>49638 | -<br>1.662690<br>177 | 0.00<br>0758 | 0.01<br>0646 | Dow<br>n |
| FOXA1  | 119.72<br>28185 | 15.65917125 | 223.7864657 | 14.291<br>07979 | 3.837043<br>021      | 1.36<br>E-13 | 2.39<br>E-11 | Up       |
| FOXA3  | 59.708<br>17735 | 6.836798302 | 112.5795564 | 16.466<br>70729 | 4.041480<br>195      | 3.56<br>E-08 | 2.03<br>E-06 | Up       |
| FOXF1  | 114.51<br>0605  | 168.3365881 | 60.68462186 | 0.3604<br>95734 | -<br>1.471945<br>909 | 0.00<br>1286 | 0.01<br>6067 | Dow<br>n |
| FOX11  | 388.62<br>51826 | 45.93819853 | 731.3121667 | 15.919<br>47856 | 3.992721<br>176      | 9.60<br>E-21 | 5.28<br>E-18 | Up       |
| FOXJ1  | 122.40<br>8303  | 6.410031185 | 238.4065748 | 37.192<br>73245 | 5.216948<br>837      | 6.50<br>E-20 | 3.28<br>E-17 | Up       |
| FOXN1  | 16.797<br>29376 | 4.485956897 | 29.10863062 | 6.4888<br>34219 | 2.697959<br>308      | 0.00<br>5189 | 0.04<br>575  | Up       |
| FOXN2  | 256.65          | 412.3766402 | 100.9385655 | 0.2447          | -                    | 5.62         | 2.44         | Dow      |

|        |                 |             |             |                 |                      |              |              |          |
|--------|-----------------|-------------|-------------|-----------------|----------------------|--------------|--------------|----------|
|        | 76029           |             |             | 72753           | 2.030485<br>122      | E-07         | E-05         | n        |
| FOXP2  | 78.271<br>61367 | 141.2625473 | 15.28068004 | 0.1081<br>72197 | -<br>3.208598<br>363 | 0.01<br>5164 | 0.09<br>9836 | Dow<br>n |
| FOXP3  | 75.541<br>09749 | 45.24211081 | 105.8400842 | 2.3394<br>15254 | 1.226147<br>968      | 0.01<br>6359 | 0.10<br>5503 | Up       |
| FOXP4  | 2543.5<br>8526  | 1299.21367  | 3787.95685  | 2.9155<br>76505 | 1.543781<br>18       | 1.21<br>E-05 | 0.00<br>035  | Up       |
| FREM1  | 284.45<br>29973 | 108.5531828 | 460.3528118 | 4.2408<br>04369 | 2.084337<br>932      | 4.29<br>E-07 | 1.91<br>E-05 | Up       |
| FRK    | 220.81<br>92004 | 98.20565346 | 343.4327474 | 3.4970<br>77157 | 1.806149<br>627      | 1.51<br>E-05 | 0.00<br>0418 | Up       |
| FRMD4A | 872.78<br>76652 | 1291.353604 | 454.2217259 | 0.3517<br>40781 | -<br>1.507415<br>482 | 2.82<br>E-05 | 0.00<br>072  | Dow<br>n |
| FRMPD1 | 54.510<br>26141 | 18.84217672 | 90.1783461  | 4.7859<br>83459 | 2.258815<br>411      | 0.00<br>0155 | 0.00<br>2976 | Up       |
| FRRS1  | 410.75<br>3876  | 78.31282193 | 743.1949302 | 9.4900<br>79809 | 3.246420<br>22       | 1.37<br>E-15 | 3.36<br>E-13 | Up       |
| FRY    | 1825.6<br>72931 | 2697.464744 | 953.8811188 | 0.3536<br>21348 | -<br>1.499722<br>723 | 0.00<br>1748 | 0.02<br>0169 | Dow<br>n |
| FRZB   | 10.157<br>91301 | 17.68648655 | 2.629339473 | 0.1486<br>63753 | -<br>2.749875<br>158 | 0.02<br>3091 | 0.13<br>4848 | Dow<br>n |
| FSD1   | 23.262<br>96105 | 10.48670107 | 36.03922104 | 3.4366<br>59516 | 1.781006<br>925      | 0.02<br>9338 | 0.15<br>907  | Up       |
| FSD1L  | 113.81<br>11907 | 152.6204466 | 75.00193483 | 0.4914<br>2783  | -<br>1.024948<br>534 | 0.02<br>7918 | 0.15<br>3475 | Dow<br>n |
| FST    | 296.60<br>61409 | 451.0654202 | 142.1468617 | 0.3151<br>35799 | -<br>1.665954<br>442 | 1.87<br>E-05 | 0.00<br>0508 | Dow<br>n |
| FSTL1  | 23033.<br>94401 | 40263.9709  | 5803.91713  | 0.1441<br>46665 | -<br>2.794390<br>635 | 3.76<br>E-05 | 0.00<br>0916 | Dow<br>n |
| FSTL3  | 1060.1<br>45195 | 1772.090762 | 348.1996275 | 0.1964<br>90854 | -<br>2.347465<br>932 | 8.04<br>E-05 | 0.00<br>1736 | Dow<br>n |
| FUT11  | 282.64<br>36142 | 467.2546287 | 98.03259967 | 0.2098<br>05519 | -<br>2.252875<br>469 | 1.72<br>E-08 | 1.08<br>E-06 | Dow<br>n |
| FUT2   | 158.49          | 18.61739077 | 298.3651206 | 16.026          | 4.002356             | 1.03         | 2.19         | Up       |

|         |                 |             |             |                 |                      |              |              |      |
|---------|-----------------|-------------|-------------|-----------------|----------------------|--------------|--------------|------|
|         | 12557           |             |             | 15126           | 094                  | E-14         | E-12         |      |
| FUT6    | 12.885<br>72192 | 4.006109502 | 21.76533433 | 5.4330<br>35298 | 2.441758<br>42       | 0.02<br>5211 | 0.14<br>3124 | Up   |
| FUZ     | 159.54<br>15582 | 71.7063101  | 247.3768063 | 3.4498<br>6105  | 1.786538<br>256      | 4.22<br>E-05 | 0.00<br>1012 | Up   |
| FXYD1   | 1540.0<br>61841 | 2516.812226 | 563.3114559 | 0.2238<br>19421 | -<br>2.159592<br>867 | 0.00<br>5838 | 0.04<br>9979 | Down |
| FXYD3   | 108.97<br>74712 | 32.56918417 | 185.3857582 | 5.6920<br>60238 | 2.508950<br>93       | 0.01<br>5024 | 0.09<br>9256 | Up   |
| FXYD4   | 338.30<br>01724 | 172.3272037 | 504.2731411 | 2.9262<br>53838 | 1.549054<br>921      | 0.00<br>1355 | 0.01<br>6719 | Up   |
| FXYD5   | 1508.1<br>31957 | 2133.651298 | 882.612617  | 0.4136<br>63009 | -<br>1.273472<br>14  | 0.00<br>0268 | 0.00<br>4632 | Down |
| FXYD6   | 7443.9<br>68479 | 3390.899967 | 11497.03699 | 3.3905<br>56225 | 1.761521<br>969      | 4.93<br>E-07 | 2.17<br>E-05 | Up   |
| FZD1    | 2853.7<br>66479 | 1628.357396 | 4079.175563 | 2.5050<br>86152 | 1.324860<br>22       | 0.00<br>0118 | 0.00<br>2363 | Up   |
| FZD4    | 1126.9<br>87276 | 1975.484091 | 278.4904606 | 0.1409<br>73274 | -<br>2.826506<br>413 | 1.37<br>E-05 | 0.00<br>0386 | Down |
| FZD7    | 1194.3<br>09731 | 457.9310001 | 1930.688461 | 4.2161<br>12167 | 2.075913<br>25       | 9.57<br>E-09 | 6.56<br>E-07 | Up   |
| FZD8    | 357.97<br>85213 | 556.0379816 | 159.9190611 | 0.2876<br>04564 | -<br>1.797841<br>526 | 0.00<br>5403 | 0.04<br>7156 | Down |
| G0S2    | 420.31<br>11456 | 743.4567384 | 97.16555287 | 0.1306<br>94293 | -<br>2.935731<br>949 | 0.01<br>9148 | 0.11<br>7961 | Down |
| GABRB1  | 8.1611<br>59668 | 15.77147229 | 0.550847042 | 0.0349<br>26799 | -<br>4.839521<br>764 | 0.00<br>438  | 0.04<br>0218 | Down |
| GABRP   | 174.21<br>8109  | 33.03058093 | 315.405637  | 9.5488<br>97663 | 3.255334<br>196      | 1.43<br>E-07 | 7.04<br>E-06 | Up   |
| GAD2    | 5.8823<br>01172 | 0           | 11.76460234 | Inf             | Inf                  | 0.00<br>4493 | 0.04<br>0932 | Up   |
| GADD45A | 553.68<br>94378 | 776.5279833 | 330.8508922 | 0.4260<br>64352 | -<br>1.230856<br>745 | 0.00<br>2179 | 0.02<br>3859 | Down |
| GADD45B | 720.49<br>15342 | 967.1085035 | 473.8745649 | 0.4899<br>91106 | -<br>1.029172<br>533 | 0.00<br>4475 | 0.04<br>0864 | Down |
| GADD45G | 2260.3          | 4226.633898 | 294.0315735 | 0.0695          | -                    | 1.35         | 0.00         | Down |

|         |                 |             |             |                 |                      |              |              |          |
|---------|-----------------|-------------|-------------|-----------------|----------------------|--------------|--------------|----------|
|         | 32736           |             |             | 66369           | 3.845466<br>168      | E-05         | 0381         | n        |
| GADL1   | 77.507<br>51752 | 154.2259014 | 0.789133669 | 0.0051<br>16739 | -<br>7.610559<br>667 | 0.01<br>1717 | 0.08<br>2669 | Dow<br>n |
| GAL3ST2 | 4.8645<br>86238 | 0.413817024 | 9.315355453 | 22.510<br>80769 | 4.492545<br>916      | 0.03<br>7331 | 0.18<br>7015 | Up       |
| GALC    | 437.96<br>65966 | 242.8771174 | 633.0560759 | 2.6064<br>8711  | 1.382106<br>726      | 0.00<br>0179 | 0.00<br>3365 | Up       |
| GALNT15 | 210.24<br>95343 | 380.3735248 | 40.12554379 | 0.1054<br>89844 | -<br>3.244823<br>984 | 1.96<br>E-09 | 1.60<br>E-07 | Dow<br>n |
| GALNT16 | 2997.7<br>06124 | 5039.956711 | 955.4555365 | 0.1895<br>7614  | -<br>2.399150<br>7   | 1.04<br>E-06 | 4.19<br>E-05 | Dow<br>n |
| GALNT5  | 280.64<br>27377 | 419.4738627 | 141.8116126 | 0.3380<br>702   | -<br>1.564605<br>243 | 0.03<br>6503 | 0.18<br>4652 | Dow<br>n |
| GALNT6  | 362.45<br>52547 | 132.1734719 | 592.7370375 | 4.4845<br>38608 | 2.164959<br>561      | 2.09<br>E-08 | 1.28<br>E-06 | Up       |
| GALNT8  | 63.675<br>26571 | 4.028119626 | 123.3224118 | 30.615<br>37969 | 4.936184<br>67       | 2.70<br>E-13 | 4.46<br>E-11 | Up       |
| GALNT9  | 10.473<br>57381 | 20.38447466 | 0.56267296  | 0.0276<br>03015 | -<br>5.179030<br>331 | 0.00<br>0234 | 0.00<br>4149 | Dow<br>n |
| GAPDHS  | 6.5965<br>66399 | 1.175420702 | 12.01771209 | 10.224<br>17937 | 3.353913<br>147      | 0.04<br>3242 | 0.20<br>6323 | Up       |
| GARNL3  | 452.22<br>41438 | 186.8310445 | 717.6172431 | 3.8409<br>95725 | 1.941480<br>358      | 5.38<br>E-07 | 2.36<br>E-05 | Up       |
| GARS    | 1891.1<br>42456 | 2586.819972 | 1195.46494  | 0.4621<br>36891 | -<br>1.113607<br>834 | 0.00<br>1011 | 0.01<br>3357 | Dow<br>n |
| GAS7    | 1182.5<br>42811 | 1729.041296 | 636.0443257 | 0.3678<br>59534 | -<br>1.442773<br>111 | 4.29<br>E-05 | 0.00<br>1025 | Dow<br>n |
| GAS8    | 271.42<br>52844 | 175.5540376 | 367.2965313 | 2.0922<br>13522 | 1.065030<br>094      | 0.00<br>6394 | 0.05<br>3272 | Up       |
| GAT     | 8.6383<br>57141 | 17.27671428 | 0           | 0               | #NAME?               | 0.00<br>0611 | 0.00<br>8959 | Dow<br>n |
| GATA2   | 219.87<br>88113 | 346.4770031 | 93.28061948 | 0.2692<br>26005 | -<br>1.893110<br>324 | 3.82<br>E-06 | 0.00<br>013  | Dow<br>n |
| GATM    | 471.75<br>42115 | 289.1025807 | 654.4058424 | 2.2635<br>7662  | 1.178604<br>141      | 0.00<br>1578 | 0.01<br>8732 | Up       |

|        |                 |             |             |                 |                      |              |              |      |
|--------|-----------------|-------------|-------------|-----------------|----------------------|--------------|--------------|------|
| GCGR   | 121.75<br>40465 | 11.97883827 | 231.5292548 | 19.328<br>18939 | 4.272634<br>591      | 1.04<br>E-15 | 2.62<br>E-13 | Up   |
| GCHI   | 339.61<br>24701 | 463.0834684 | 216.1414717 | 0.4667<br>44089 | -<br>1.099296<br>342 | 0.00<br>4038 | 0.03<br>767  | Down |
| GCKR   | 11.869<br>54825 | 2.874709047 | 20.86438746 | 7.2579<br>12756 | 2.859554<br>715      | 0.01<br>241  | 0.08<br>6122 | Up   |
| GCLC   | 778.33<br>04856 | 473.9091048 | 1082.751866 | 2.2847<br>24761 | 1.192020<br>375      | 0.00<br>0812 | 0.01<br>1274 | Up   |
| GCNT2  | 93.018<br>3617  | 129.1521919 | 56.88453155 | 0.4404<br>45731 | -<br>1.182963<br>825 | 0.01<br>5226 | 0.10<br>0081 | Down |
| GCNT4  | 155.53<br>73635 | 210.986775  | 100.0879519 | 0.4743<br>80216 | -<br>1.075884<br>251 | 0.00<br>9433 | 0.07<br>0961 | Down |
| GCNT7  | 35.978<br>20891 | 8.056239251 | 63.90017858 | 7.9317<br>62772 | 2.987641<br>529      | 0.02<br>1518 | 0.12<br>8168 | Up   |
| GDF6   | 40.777<br>62092 | 77.39432422 | 4.160917611 | 0.0537<br>62568 | -<br>4.217254<br>142 | 0.01<br>4889 | 0.09<br>8688 | Down |
| GDF7   | 4.3593<br>40964 | 8.449171367 | 0.269510562 | 0.0318<br>97869 | -<br>4.970396<br>143 | 0.02<br>9092 | 0.15<br>8181 | Down |
| GEM    | 3362.9<br>24317 | 5751.880999 | 973.9676348 | 0.1693<br>30283 | -<br>2.562088<br>091 | 0.00<br>4001 | 0.03<br>7408 | Down |
| GEMIN7 | 372.00<br>89191 | 235.3668142 | 508.651024  | 2.1610<br>99158 | 1.111765<br>269      | 0.00<br>3415 | 0.03<br>3424 | Up   |
| GFI1   | 70.235<br>72099 | 37.94182001 | 102.529622  | 2.7022<br>85287 | 1.434179<br>992      | 0.00<br>6527 | 0.05<br>4037 | Up   |
| GFPT1  | 458.19<br>43463 | 634.7619803 | 281.6267123 | 0.4436<br>72937 | -<br>1.172431<br>539 | 0.00<br>1701 | 0.01<br>9755 | Down |
| GFPT2  | 2232.1<br>02997 | 4285.315458 | 178.8905362 | 0.0417<br>4501  | -<br>4.582252<br>439 | 5.17<br>E-08 | 2.80<br>E-06 | Down |
| GFRA1  | 275.03<br>54405 | 156.8712104 | 393.1996707 | 2.5065<br>12634 | 1.325681<br>506      | 0.00<br>1367 | 0.01<br>685  | Up   |
| GFRA3  | 121.79<br>67525 | 214.5916287 | 29.00187628 | 0.1351<br>4915  | -<br>2.887375<br>653 | 1.51<br>E-09 | 1.29<br>E-07 | Down |
| GFRA4  | 3267.9<br>2894  | 5233.133557 | 1302.724323 | 0.2489<br>37718 | -<br>2.006143<br>26  | 0.01<br>0864 | 0.07<br>851  | Down |

|        |                 |             |             |                 |                      |              |              |      |
|--------|-----------------|-------------|-------------|-----------------|----------------------|--------------|--------------|------|
| GGT6   | 374.39<br>00544 | 79.79656821 | 668.9835407 | 8.3836<br>12926 | 3.067572<br>109      | 8.95<br>E-14 | 1.62<br>E-11 | Up   |
| GIMAP1 | 230.87<br>05575 | 134.6832527 | 327.0578623 | 2.4283<br>48408 | 1.279975<br>428      | 0.00<br>1423 | 0.01<br>7375 | Up   |
| GIMAP4 | 383.18<br>93007 | 203.6834852 | 562.6951162 | 2.7625<br>9568  | 1.466024<br>432      | 0.01<br>3387 | 0.09<br>1402 | Up   |
| GIMAP5 | 169.31<br>74815 | 95.68788748 | 242.9470756 | 2.5389<br>53278 | 1.344233<br>847      | 0.00<br>1337 | 0.01<br>6568 | Up   |
| GIMAP6 | 517.26<br>59726 | 262.6226373 | 771.9093079 | 2.9392<br>33707 | 1.555440<br>077      | 2.51<br>E-05 | 0.00<br>0653 | Up   |
| GIMAP7 | 1865.3<br>89747 | 985.2309958 | 2745.548498 | 2.7867<br>05361 | 1.478560<br>474      | 0.00<br>0106 | 0.00<br>2163 | Up   |
| GIMAP8 | 991.08<br>58236 | 595.7952838 | 1386.376363 | 2.3269<br>34101 | 1.218430<br>354      | 0.00<br>0555 | 0.00<br>834  | Up   |
| GIPC3  | 91.940<br>45988 | 159.7581669 | 24.12275284 | 0.1509<br>95428 | -<br>2.727423<br>225 | 0.04<br>5143 | 0.21<br>2819 | Down |
| GJA1   | 7421.9<br>59012 | 13540.71444 | 1303.203584 | 0.0962<br>4334  | -<br>3.377169<br>48  | 0.03<br>9033 | 0.19<br>2717 | Down |
| GJB1   | 128.39<br>1406  | 29.02009611 | 227.7627158 | 7.8484<br>48021 | 2.972407<br>399      | 1.08<br>E-09 | 9.68<br>E-08 | Up   |
| GJB3   | 48.597<br>38791 | 15.32044462 | 81.8743312  | 5.3441<br>22394 | 2.417953<br>05       | 0.00<br>0105 | 0.00<br>2153 | Up   |
| GJB4   | 10.259<br>07859 | 1.175420702 | 19.34273648 | 16.456<br>0114  | 4.040542<br>793      | 0.00<br>3458 | 0.03<br>3772 | Up   |
| GJB5   | 18.382<br>86948 | 6.37896103  | 30.38677794 | 4.7635<br>936   | 2.252050<br>337      | 0.01<br>4267 | 0.09<br>5789 | Up   |
| GJB7   | 8.7752<br>719   | 1.175420702 | 16.3751231  | 13.931<br>28696 | 3.800256<br>633      | 0.00<br>9434 | 0.07<br>0961 | Up   |
| GJC1   | 585.85<br>5893  | 924.3319826 | 247.3798035 | 0.2676<br>30903 | -<br>1.901683<br>381 | 0.00<br>0395 | 0.00<br>6391 | Down |
| GJD3   | 20.168<br>78216 | 36.27457234 | 4.062991987 | 0.1120<br>06613 | -<br>3.158344<br>181 | 0.00<br>034  | 0.00<br>5667 | Down |
| GLB1L2 | 77.379<br>03736 | 45.60108239 | 109.1569923 | 2.3937<br>36873 | 1.259264<br>575      | 0.01<br>4403 | 0.09<br>629  | Up   |
| GLI3   | 1510.7<br>77832 | 2130.441893 | 891.1137705 | 0.4182<br>76496 | -<br>1.257471<br>162 | 0.03<br>2645 | 0.17<br>0944 | Down |
| GLIPR2 | 1446.0<br>31101 | 2052.193174 | 839.8690282 | 0.4092<br>54372 | -<br>1.288930<br>267 | 0.00<br>0243 | 0.00<br>4276 | Down |

|         |                 |             |             |                 |                      |              |              |      |
|---------|-----------------|-------------|-------------|-----------------|----------------------|--------------|--------------|------|
| GLP1R   | 179.04<br>30211 | 27.21850811 | 330.8675342 | 12.155<br>9761  | 3.603593<br>839      | 1.57<br>E-12 | 2.19<br>E-10 | Up   |
| GLRX5   | 1138.8<br>13317 | 663.2693344 | 1614.3573   | 2.4339<br>393   | 1.283293<br>189      | 0.00<br>0354 | 0.00<br>5856 | Up   |
| GLS     | 2227.9<br>89936 | 3389.924864 | 1066.055007 | 0.3144<br>77474 | -<br>1.668971<br>416 | 0.00<br>2838 | 0.02<br>9191 | Down |
| GLYAT   | 25.675<br>60946 | 50.81219781 | 0.539021123 | 0.0106<br>08105 | -<br>6.558689<br>246 | 4.15<br>E-05 | 0.00<br>0998 | Down |
| GMDS    | 1109.0<br>03094 | 706.0069891 | 1511.999199 | 2.1416<br>20724 | 1.098703<br>005      | 0.00<br>2215 | 0.02<br>4155 | Up   |
| GNAQ    | 461.93<br>76862 | 632.6548024 | 291.22057   | 0.4603<br>15118 | -<br>1.119306<br>27  | 0.00<br>296  | 0.03<br>0174 | Down |
| GNB4    | 835.33<br>87241 | 1381.056819 | 289.6206294 | 0.2097<br>09424 | -<br>2.253536<br>402 | 1.17<br>E-05 | 0.00<br>0341 | Down |
| GNB5    | 470.44<br>40018 | 719.5007252 | 221.3872785 | 0.3076<br>95699 | -<br>1.700423<br>818 | 0.00<br>0964 | 0.01<br>2886 | Down |
| GNG10   | 1915.4<br>36475 | 2567.820537 | 1263.052413 | 0.4918<br>77214 | -<br>1.023629<br>87  | 0.00<br>3561 | 0.03<br>4491 | Down |
| GNG11   | 2321.2<br>4391  | 3435.971617 | 1206.516203 | 0.3511<br>42657 | -<br>1.509870<br>828 | 0.03<br>0084 | 0.16<br>1687 | Down |
| GNG12   | 193.20<br>90644 | 296.6108305 | 89.80729823 | 0.3027<br>78216 | -<br>1.723666<br>682 | 4.39<br>E-05 | 0.00<br>1046 | Down |
| GNG13   | 20.724<br>1159  | 1.61124785  | 39.83698395 | 24.724<br>30542 | 4.627858<br>087      | 6.48<br>E-06 | 0.00<br>0207 | Up   |
| GNG4    | 24.196<br>78043 | 48.39356086 | 0           | 0               | #NAME?               | 8.13<br>E-07 | 3.35<br>E-05 | Down |
| GNMT    | 97.997<br>01611 | 34.46638775 | 161.5276445 | 4.6865<br>26643 | 2.228519<br>085      | 9.33<br>E-06 | 0.00<br>0282 | Up   |
| GOLGA7B | 415.05<br>65976 | 64.71628592 | 765.3969093 | 11.826<br>95976 | 3.564007<br>357      | 9.06<br>E-14 | 1.63<br>E-11 | Up   |
| GOLT1B  | 398.86<br>31229 | 579.1103254 | 218.6159204 | 0.3775<br>03061 | -<br>1.405439<br>753 | 0.00<br>0204 | 0.00<br>3763 | Down |
| GPA33   | 189.99<br>4343  | 59.52375464 | 320.4649314 | 5.3838<br>15811 | 2.428629<br>054      | 3.35<br>E-08 | 1.93<br>E-06 | Up   |
| GPAT2   | 29.547          | 48.41426192 | 10.68166413 | 0.2206          | -                    | 0.00         | 0.02         | Down |

|         |                 |             |             |                 |                      |              |              |      |
|---------|-----------------|-------------|-------------|-----------------|----------------------|--------------|--------------|------|
|         | 96303           |             |             | 30527           | 2.180295<br>674      | 2276         | 4642         | n    |
| GPC2    | 35.290<br>60375 | 14.62098125 | 55.96022625 | 3.8273<br>9197  | 1.936361<br>658      | 0.00<br>4557 | 0.04<br>1447 | Up   |
| GPC6    | 52.496<br>27821 | 92.76291335 | 12.22964308 | 0.1318<br>37635 | -<br>2.923165<br>83  | 0.00<br>0638 | 0.00<br>9263 | Down |
| GPER1   | 33.432<br>77515 | 57.21462474 | 9.65092556  | 0.1686<br>79347 | -<br>2.567644<br>75  | 0.00<br>0188 | 0.00<br>3514 | Down |
| GPM6A   | 449.46<br>88812 | 810.9599931 | 87.97776929 | 0.1084<br>85955 | -<br>3.204419<br>817 | 0.00<br>0482 | 0.00<br>753  | Down |
| GPR1    | 356.95<br>94531 | 701.8348135 | 12.08409271 | 0.0172<br>17859 | -<br>5.859950<br>449 | 1.49<br>E-06 | 5.76<br>E-05 | Down |
| GPR110  | 31.096<br>25111 | 15.94594281 | 46.24655942 | 2.9002<br>08535 | 1.536156<br>638      | 0.02<br>7194 | 0.15<br>0518 | Up   |
| GPR133  | 2248.7<br>37863 | 4036.640543 | 460.8351826 | 0.1141<br>63047 | -<br>3.130832<br>354 | 4.44<br>E-05 | 0.00<br>1052 | Down |
| GPR137C | 41.744<br>29996 | 14.52388073 | 68.96471919 | 4.7483<br>67222 | 2.247431<br>512      | 0.00<br>0526 | 0.00<br>8012 | Up   |
| GPR141  | 37.446<br>58665 | 18.45602505 | 56.43714825 | 3.0579<br>25426 | 1.612553<br>224      | 0.01<br>7781 | 0.11<br>2033 | Up   |
| GPR143  | 37.351<br>90609 | 19.48126494 | 55.22254724 | 2.8346<br>48951 | 1.503170<br>08       | 0.02<br>264  | 0.13<br>2925 | Up   |
| GPR146  | 318.56<br>18968 | 469.4879779 | 167.6358156 | 0.3570<br>60933 | -<br>1.485757<br>8   | 0.00<br>0106 | 0.00<br>2163 | Down |
| GPR153  | 1225.5<br>12728 | 1764.579464 | 686.4459926 | 0.3890<br>1393  | -<br>1.362106<br>277 | 0.00<br>1068 | 0.01<br>3912 | Down |
| GPR156  | 71.638<br>12492 | 99.68979754 | 43.58645231 | 0.4372<br>20793 | -<br>1.193566<br>082 | 0.01<br>982  | 0.12<br>059  | Down |
| GPR162  | 91.567<br>46767 | 163.6884417 | 19.44649362 | 0.1188<br>01874 | -<br>3.073370<br>502 | 0.00<br>3161 | 0.03<br>1649 | Down |
| GPR173  | 377.11<br>54804 | 565.636602  | 188.5943589 | 0.3334<br>19652 | -<br>1.584588<br>955 | 0.00<br>0987 | 0.01<br>3115 | Down |
| GPR174  | 449.56<br>93958 | 254.2806262 | 644.8581654 | 2.5360<br>09821 | 1.342560<br>333      | 0.00<br>8363 | 0.06<br>5166 | Up   |



|        |                 |             |             |                 |                      |              |              |      |
|--------|-----------------|-------------|-------------|-----------------|----------------------|--------------|--------------|------|
| GPR31  | 43.045<br>38182 | 21.77838612 | 64.31237753 | 2.9530<br>36886 | 1.562199<br>377      | 0.01<br>3039 | 0.08<br>95   | Up   |
| GPR34  | 134.33<br>03996 | 78.76284992 | 189.8979492 | 2.4110<br>09117 | 1.269637<br>106      | 0.00<br>3554 | 0.03<br>445  | Up   |
| GPR37  | 334.77<br>01562 | 113.8934897 | 555.6468226 | 4.8786<br>53063 | 2.286482<br>892      | 1.29<br>E-08 | 8.31<br>E-07 | Up   |
| GPR39  | 68.640<br>12655 | 35.16697633 | 102.1132768 | 2.9036<br>69505 | 1.537877<br>256      | 0.00<br>4493 | 0.04<br>0932 | Up   |
| GPR63  | 566.01<br>29531 | 862.7619976 | 269.2639087 | 0.3120<br>95235 | -<br>1.679941<br>763 | 0.01<br>6931 | 0.10<br>7889 | Down |
| GPR64  | 49.291<br>04119 | 77.35847298 | 21.22360941 | 0.2743<br>54038 | -<br>1.865889<br>287 | 0.00<br>1347 | 0.01<br>6665 | Down |
| GPR65  | 111.88<br>79597 | 47.17235474 | 176.6035647 | 3.7437<br>93703 | 1.904500<br>939      | 0.00<br>6038 | 0.05<br>1077 | Up   |
| GPR87  | 32.866<br>36549 | 9.641586916 | 56.09114406 | 5.8176<br>25724 | 2.540430<br>484      | 0.00<br>0449 | 0.00<br>7098 | Up   |
| GPR97  | 42.969<br>93267 | 81.68495486 | 4.254910486 | 0.0520<br>8928  | -<br>4.262869<br>694 | 0.00<br>03   | 0.00<br>5078 | Down |
| GPR98  | 1603.2<br>14564 | 383.3140333 | 2823.115094 | 7.3650<br>18883 | 2.880689<br>224      | 3.46<br>E-06 | 0.00<br>012  | Up   |
| GPRC5A | 446.63<br>69619 | 837.560971  | 55.71295273 | 0.0665<br>18086 | -<br>3.910109<br>532 | 0.00<br>4765 | 0.04<br>2913 | Down |
| GPRIN2 | 118.76<br>78427 | 41.80455831 | 195.731127  | 4.6820<br>52268 | 2.227141<br>04       | 1.23<br>E-05 | 0.00<br>0353 | Up   |
| GPX2   | 20.841<br>76083 | 2.901249186 | 38.78227247 | 13.367<br>43933 | 3.740651<br>224      | 7.14<br>E-05 | 0.00<br>1584 | Up   |
| GPX3   | 12189.<br>62946 | 23299.14176 | 1080.117153 | 0.0463<br>58667 | -<br>4.431017<br>108 | 0.00<br>5808 | 0.04<br>9807 | Down |
| GPX7   | 958.07<br>64203 | 1613.507523 | 302.6453176 | 0.1875<br>69821 | -<br>2.414500<br>369 | 0.00<br>1232 | 0.01<br>5532 | Down |
| GPX8   | 1309.9<br>08447 | 1760.497013 | 859.3198816 | 0.4881<br>12093 | -<br>1.034715<br>6   | 0.01<br>449  | 0.09<br>6715 | Down |
| GRAMD2 | 163.45<br>68988 | 263.299074  | 63.6147235  | 0.2416<br>06332 | -<br>2.049269<br>829 | 0.00<br>0816 | 0.01<br>1314 | Down |
| GRASP  | 314.55<br>65362 | 457.9983697 | 171.1147027 | 0.3736<br>14218 | -<br>1.420378        | 0.00<br>2344 | 0.02<br>5225 | Down |

|          |                 |             |             |                 |                      |              |              |      |
|----------|-----------------|-------------|-------------|-----------------|----------------------|--------------|--------------|------|
|          |                 |             |             |                 | 737                  |              |              |      |
| GRB7     | 457.45<br>65163 | 113.0300796 | 801.882953  | 7.0944<br>20843 | 2.826684<br>914      | 1.53<br>E-12 | 2.15<br>E-10 | Up   |
| GREB1    | 2327.2<br>61677 | 4087.355671 | 567.1676817 | 0.1387<br>61519 | -<br>2.849320<br>556 | 0.00<br>2273 | 0.02<br>4629 | Down |
| GRHL1    | 2445.4<br>94014 | 1214.332326 | 3676.655703 | 3.0277<br>17886 | 1.598230<br>785      | 0.00<br>193  | 0.02<br>1687 | Up   |
| GRHL2    | 1029.2<br>89579 | 303.6900778 | 1754.88908  | 5.7785<br>52571 | 2.530708<br>167      | 1.42<br>E-11 | 1.74<br>E-09 | Up   |
| GRHL3    | 131.03<br>13433 | 40.52522748 | 221.5374591 | 5.4666<br>55535 | 2.450658<br>471      | 1.94<br>E-07 | 9.30<br>E-06 | Up   |
| GRIA3    | 226.94<br>10796 | 148.7748578 | 305.1073014 | 2.0507<br>9881  | 1.036185<br>966      | 0.00<br>7845 | 0.06<br>2063 | Up   |
| GRIK4    | 34.889<br>58082 | 17.23141413 | 52.54774751 | 3.0495<br>31926 | 1.608587<br>82       | 0.01<br>7651 | 0.11<br>1503 | Up   |
| GRIN1    | 68.963<br>39456 | 39.62590783 | 98.30088129 | 2.4807<br>22504 | 1.310760<br>363      | 0.02<br>1514 | 0.12<br>8168 | Up   |
| GRIN3A   | 18.820<br>2954  | 34.35065274 | 3.289938057 | 0.0957<br>75125 | -<br>3.384205<br>188 | 0.00<br>0218 | 0.00<br>3945 | Down |
| GRK5     | 1650.5<br>97879 | 2252.752231 | 1048.443527 | 0.4654<br>0561  | -<br>1.103439<br>494 | 0.00<br>9895 | 0.07<br>3322 | Down |
| GRM8     | 22.425<br>50588 | 40.35024255 | 4.50076921  | 0.1115<br>42557 | -<br>3.164333<br>852 | 0.03<br>2765 | 0.17<br>1523 | Down |
| GRP      | 1171.3<br>0846  | 354.4035894 | 1988.213332 | 5.6100<br>25944 | 2.488007<br>443      | 1.96<br>E-11 | 2.35<br>E-09 | Up   |
| GSAP     | 418.14<br>23388 | 224.0136288 | 612.2710488 | 2.7331<br>86601 | 1.450583<br>959      | 0.00<br>0114 | 0.00<br>2283 | Up   |
| GSC      | 32.301<br>52943 | 53.69918784 | 10.90387102 | 0.2030<br>54673 | -<br>2.300059<br>867 | 0.01<br>2244 | 0.08<br>5266 | Down |
| GSDMC    | 21.153<br>2822  | 0           | 42.30656441 | Inf             | Inf                  | 1.08<br>E-08 | 7.25<br>E-07 | Up   |
| GSN      | 58068.<br>40893 | 86859.40088 | 29277.41699 | 0.3370<br>66762 | -<br>1.568893<br>725 | 0.04<br>9139 | 0.22<br>5793 | Down |
| GSTA2    | 4.8360<br>08559 | 9.672017117 | 0           | 0               | #NAME?               | 0.00<br>4966 | 0.04<br>4437 | Down |
| GSTT1    | 1318.3<br>46    | 602.5236834 | 2034.168317 | 3.3760<br>80266 | 1.755349<br>204      | 1.05<br>E-06 | 4.20<br>E-05 | Up   |
| GTF2IRD1 | 269.55          | 154.5982994 | 384.5175626 | 2.4872          | 1.314525             | 0.00         | 0.01         | Up   |

|         |                 |             |             |                 |                      |              |              |      |
|---------|-----------------|-------------|-------------|-----------------|----------------------|--------------|--------------|------|
|         | 7931            |             |             | 04349           | 044                  | 093          | 2525         |      |
| GTF3C1  | 8529.2<br>76953 | 2725.307451 | 14333.24645 | 5.2593<br>13568 | 2.394874<br>515      | 9.14<br>E-06 | 0.00<br>0277 | Up   |
| GUCY2C  | 66.279<br>65393 | 22.39999424 | 110.1593136 | 4.9178<br>27765 | 2.298021<br>209      | 3.45<br>E-05 | 0.00<br>0859 | Up   |
| GUCY2D  | 257.37<br>06837 | 58.88983638 | 455.8515309 | 7.7407<br>50508 | 2.952473<br>45       | 6.21<br>E-12 | 8.05<br>E-10 | Up   |
| GUSB    | 1008.7<br>49333 | 1419.60093  | 597.8977355 | 0.4211<br>73108 | -<br>1.247514<br>773 | 0.01<br>4977 | 0.09<br>9091 | Down |
| GYG2    | 501.09<br>36116 | 695.998509  | 306.1887141 | 0.4399<br>27256 | -<br>1.184663<br>108 | 0.00<br>1081 | 0.01<br>4063 | Down |
| GZMB    | 7.0190<br>73608 | 13.49912609 | 0.539021123 | 0.0399<br>30075 | -<br>4.646380<br>392 | 0.00<br>5524 | 0.04<br>7751 | Down |
| GZMK    | 26.182<br>08181 | 11.80777256 | 40.55639106 | 3.4347<br>19871 | 1.780192<br>441      | 0.02<br>0336 | 0.12<br>2982 | Up   |
| H2AFY2  | 318.95<br>69149 | 149.9226715 | 487.9911583 | 3.2549<br>52394 | 1.702636<br>443      | 1.55<br>E-05 | 0.00<br>0427 | Up   |
| HAND2   | 66.235<br>03736 | 121.4488801 | 11.02119466 | 0.0907<br>47602 | -<br>3.461996<br>666 | 0.00<br>6694 | 0.05<br>5017 | Down |
| HAPLN3  | 552.10<br>15563 | 807.7288459 | 296.4742668 | 0.3670<br>46774 | -<br>1.445964<br>174 | 6.27<br>E-05 | 0.00<br>1426 | Down |
| HAS1    | 19.075<br>93346 | 37.58919395 | 0.56267296  | 0.0149<br>69008 | -<br>6.061877<br>533 | 0.01<br>4353 | 0.09<br>6219 | Down |
| HAS3    | 767.01<br>08971 | 449.2963741 | 1084.72542  | 2.4142<br>75927 | 1.271590<br>571      | 0.00<br>0394 | 0.00<br>6383 | Up   |
| HCFC2   | 592.96<br>94055 | 857.7166438 | 328.2221672 | 0.3826<br>69696 | -<br>1.385828<br>439 | 0.00<br>0166 | 0.00<br>3155 | Down |
| HCN1    | 83.656<br>93829 | 161.1954295 | 6.118447054 | 0.0379<br>56703 | -<br>4.719501<br>505 | 0.00<br>913  | 0.06<br>9327 | Down |
| HCST    | 36.153<br>8963  | 20.74925616 | 51.55853645 | 2.4848<br>37821 | 1.313151<br>694      | 0.04<br>7283 | 0.22<br>0107 | Up   |
| HDAC10  | 1048.3<br>90091 | 573.6877578 | 1523.092423 | 2.6549<br>15331 | 1.408665<br>852      | 9.30<br>E-05 | 0.00<br>1966 | Up   |
| HDDC3   | 256.64<br>80816 | 167.6772841 | 345.6188791 | 2.0612<br>14677 | 1.043494<br>771      | 0.00<br>8337 | 0.06<br>5027 | Up   |
| HEATR5A | 1409.7          | 2100.588011 | 718.8545453 | 0.3422          | -                    | 5.13         | 0.00         | Down |

|          |                 |             |             |                 |                      |              |              |          |
|----------|-----------------|-------------|-------------|-----------------|----------------------|--------------|--------------|----------|
|          | 21278           |             |             | 15866           | 1.547021<br>447      | E-05         | 1197         | n        |
| HEG1     | 3085.3<br>65273 | 4908.949794 | 1261.780752 | 0.2570<br>36801 | -<br>1.959953<br>163 | 2.14<br>E-08 | 1.30<br>E-06 | Dow<br>n |
| HENMT1   | 66.857<br>02119 | 107.9311487 | 25.78289374 | 0.2388<br>82788 | -<br>2.065625<br>185 | 0.03<br>2211 | 0.16<br>9407 | Dow<br>n |
| HEPACAM  | 124.92<br>63234 | 62.0139225  | 187.8387243 | 3.0289<br>76668 | 1.598830<br>465      | 0.00<br>048  | 0.00<br>7511 | Up       |
| HEPACAM2 | 1026.7<br>91355 | 96.62808592 | 1956.954623 | 20.252<br>44115 | 4.340023<br>91       | 3.59<br>E-27 | 5.42<br>E-24 | Up       |
| HEPH     | 151.30<br>54671 | 212.6952993 | 89.91563498 | 0.4227<br>43875 | -<br>1.242144<br>243 | 0.01<br>4431 | 0.09<br>6427 | Dow<br>n |
| HEPHL1   | 6.5346<br>99351 | 0           | 13.0693987  | Inf             | Inf                  | 0.00<br>2613 | 0.02<br>7371 | Up       |
| HERC1    | 55.877<br>34514 | 79.40278313 | 32.35190715 | 0.4074<br>40468 | -<br>1.295338<br>814 | 0.02<br>2395 | 0.13<br>1784 | Dow<br>n |
| HES4     | 1012.1<br>25723 | 658.8100856 | 1365.441361 | 2.0725<br>87216 | 1.051432<br>813      | 0.00<br>3609 | 0.03<br>478  | Up       |
| HES6     | 46.221<br>69669 | 23.22826824 | 69.21512514 | 2.9797<br>79828 | 1.575205<br>736      | 0.00<br>9631 | 0.07<br>2013 | Up       |
| HGF      | 274.17<br>70204 | 414.6489864 | 133.7050543 | 0.3224<br>5359  | -<br>1.632836<br>562 | 3.75<br>E-05 | 0.00<br>0915 | Dow<br>n |
| HGFAC    | 112.75<br>17226 | 67.5406292  | 157.9628159 | 2.3387<br>8212  | 1.225757<br>467      | 0.00<br>9081 | 0.06<br>9214 | Up       |
| HHAT     | 120.46<br>87617 | 62.12056831 | 178.8169552 | 2.8785<br>46672 | 1.525340<br>604      | 0.00<br>0853 | 0.01<br>1682 | Up       |
| HHEX     | 258.06<br>40499 | 371.8695954 | 144.2585045 | 0.3879<br>27667 | -<br>1.366140<br>424 | 0.01<br>4282 | 0.09<br>582  | Dow<br>n |
| HHIPL1   | 503.12<br>39547 | 857.1782951 | 149.0696143 | 0.1739<br>0736  | -<br>2.523609<br>105 | 4.05<br>E-10 | 3.77<br>E-08 | Dow<br>n |
| HIC1     | 344.91<br>89249 | 551.8054625 | 138.0323873 | 0.2501<br>4683  | -<br>1.999152<br>924 | 2.21<br>E-07 | 1.05<br>E-05 | Dow<br>n |
| HIF3A    | 152.74<br>03443 | 283.3739803 | 22.10670828 | 0.0780<br>12485 | -<br>3.680151<br>168 | 0.00<br>2783 | 0.02<br>8736 | Dow<br>n |
| HIGD1A   | 305.82          | 422.742796  | 188.9103957 | 0.4468          | -                    | 0.00         | 0.02         | Dow      |

|               |                 |             |             |                 |                      |              |              |          |
|---------------|-----------------|-------------|-------------|-----------------|----------------------|--------------|--------------|----------|
|               | 65959           |             |             | 68397           | 1.162078<br>075      | 2738         | 837          | n        |
| HIPK4         | 36.792<br>34877 | 18.73261136 | 54.85208618 | 2.9281<br>60155 | 1.549994<br>464      | 0.01<br>9784 | 0.12<br>0487 | Up       |
| HIST1H1C      | 121.40<br>08809 | 195.970804  | 46.83095778 | 0.2389<br>69055 | -<br>2.065104<br>286 | 0.00<br>2241 | 0.02<br>4375 | Dow<br>n |
| HIST1H2A<br>C | 68.763<br>43823 | 111.3223129 | 26.20456355 | 0.2353<br>93632 | -<br>2.086852<br>803 | 0.00<br>8566 | 0.06<br>6123 | Dow<br>n |
| HIST1H2B<br>D | 155.19<br>73549 | 248.5367961 | 61.8579136  | 0.2488<br>88352 | -<br>2.006429<br>381 | 0.01<br>8307 | 0.11<br>4352 | Dow<br>n |
| HIST1H3G      | 11.580<br>894   | 20.17683825 | 2.98494974  | 0.1479<br>3942  | -<br>2.756921<br>574 | 0.03<br>7988 | 0.18<br>8899 | Dow<br>n |
| HIST2H2BE     | 3080.0<br>38643 | 4558.709361 | 1601.367926 | 0.3512<br>766   | -<br>1.509320<br>618 | 1.22<br>E-05 | 0.00<br>0352 | Dow<br>n |
| HIVEP2        | 1250.6<br>26454 | 1713.269662 | 787.9832466 | 0.4599<br>29493 | -<br>1.120515<br>382 | 0.00<br>152  | 0.01<br>8184 | Dow<br>n |
| HKDC1         | 134.93<br>23762 | 51.57319069 | 218.2915618 | 4.2326<br>55744 | 2.081563<br>154      | 8.29<br>E-06 | 0.00<br>0255 | Up       |
| HLCS          | 966.38<br>82933 | 586.3408124 | 1346.435774 | 2.2963<br>36441 | 1.199334<br>03       | 0.00<br>0792 | 0.01<br>1043 | Up       |
| HMCN1         | 1249.5<br>54164 | 1832.272605 | 666.8357242 | 0.3639<br>39145 | -<br>1.458230<br>862 | 0.01<br>0438 | 0.07<br>6287 | Dow<br>n |
| HMGA1         | 634.31<br>0315  | 283.8803678 | 984.7402621 | 3.4688<br>5651  | 1.794460<br>165      | 1.66<br>E-06 | 6.34<br>E-05 | Up       |
| HOMER2        | 406.00<br>98001 | 245.3578937 | 566.6617065 | 2.3095<br>31183 | 1.207600<br>026      | 0.02<br>5395 | 0.14<br>3807 | Up       |
| HOOK2         | 913.55<br>44585 | 426.9502246 | 1400.158692 | 3.2794<br>42454 | 1.713450<br>56       | 3.03<br>E-06 | 0.00<br>0106 | Up       |
| HOXA10        | 159.85<br>88806 | 281.5336394 | 38.18412176 | 0.1356<br>28985 | -<br>2.882262<br>568 | 0.02<br>5512 | 0.14<br>4257 | Dow<br>n |
| HOXA11        | 19.767<br>92106 | 38.996821   | 0.539021123 | 0.0138<br>22181 | -<br>6.176870<br>9   | 2.04<br>E-05 | 0.00<br>0547 | Dow<br>n |
| HOXA4         | 82.700<br>42836 | 122.2969721 | 43.10388465 | 0.3524<br>52591 | -<br>1.504498<br>885 | 0.00<br>2144 | 0.02<br>3561 | Dow<br>n |

|        |                 |             |             |                 |                      |              |              |          |
|--------|-----------------|-------------|-------------|-----------------|----------------------|--------------|--------------|----------|
| HOXA6  | 183.68<br>00221 | 246.6345189 | 120.7255252 | 0.4894<br>916   | -<br>1.030643<br>994 | 0.01<br>1999 | 0.08<br>4274 | Dow<br>n |
| HOXB2  | 163.05<br>9802  | 240.4018115 | 85.71779243 | 0.3565<br>6051  | -<br>1.487781<br>167 | 0.00<br>8338 | 0.06<br>5027 | Dow<br>n |
| HOXB3  | 150.32<br>44756 | 217.5775136 | 83.07143767 | 0.3818<br>01576 | -<br>1.389105<br>036 | 0.00<br>1235 | 0.01<br>5553 | Dow<br>n |
| HOXB4  | 86.595<br>98751 | 115.6993656 | 57.49260943 | 0.4969<br>13783 | -<br>1.008932<br>537 | 0.03<br>5901 | 0.18<br>2351 | Dow<br>n |
| HOXC10 | 259.79<br>05736 | 399.2809541 | 120.3001931 | 0.3012<br>9209  | -<br>1.730765<br>298 | 0.00<br>432  | 0.03<br>9813 | Dow<br>n |
| HOXC6  | 823.19<br>84649 | 1194.671188 | 451.7257423 | 0.3781<br>17215 | -<br>1.403094<br>561 | 0.00<br>0106 | 0.00<br>2162 | Dow<br>n |
| HOXC8  | 339.59<br>78451 | 529.1861749 | 150.0095153 | 0.2834<br>72098 | -<br>1.818721<br>355 | 0.00<br>2101 | 0.02<br>3203 | Dow<br>n |
| HOXD3  | 457.92<br>8512  | 644.4447935 | 271.4122305 | 0.4211<br>56681 | -<br>1.247571<br>041 | 0.00<br>0761 | 0.01<br>0671 | Dow<br>n |
| HOXD4  | 487.89<br>84701 | 765.5602716 | 210.2366685 | 0.2746<br>18049 | -<br>1.864501<br>644 | 6.88<br>E-07 | 2.87<br>E-05 | Dow<br>n |
| HOXD8  | 381.04<br>62892 | 543.2981707 | 218.7944077 | 0.4027<br>15156 | -<br>1.312168<br>326 | 0.00<br>0504 | 0.00<br>7754 | Dow<br>n |
| HPCA   | 13.229<br>40597 | 4.054659765 | 22.40415217 | 5.5255<br>31973 | 2.466113<br>367      | 0.02<br>1617 | 0.12<br>8633 | Up       |
| HPCAL1 | 562.97<br>14477 | 760.0030896 | 365.9398057 | 0.4814<br>97787 | -<br>1.054398<br>928 | 0.04<br>884  | 0.22<br>5222 | Dow<br>n |
| HPDL   | 44.744<br>93427 | 17.85642705 | 71.6334415  | 4.0116<br>33531 | 2.004189<br>82       | 0.00<br>1422 | 0.01<br>7375 | Up       |
| HPGDS  | 10.232<br>70643 | 18.81287173 | 1.652541126 | 0.0878<br>40982 | -<br>3.508962<br>008 | 0.00<br>5434 | 0.04<br>7206 | Dow<br>n |
| HPN    | 2245.8<br>96084 | 1037.456644 | 3454.335524 | 3.3296<br>19163 | 1.735357<br>173      | 0.00<br>0225 | 0.00<br>4055 | Up       |
| HPSE   | 62.894<br>68933 | 100.8564888 | 24.93288989 | 0.2472<br>1156  | -<br>2.016181        | 0.01<br>55   | 0.10<br>1212 | Dow<br>n |

|          |                 |             |             |                 |                      |              |              |      |
|----------|-----------------|-------------|-------------|-----------------|----------------------|--------------|--------------|------|
|          |                 |             |             |                 | 89                   |              |              |      |
| HPX      | 11.278<br>51926 | 1.223970965 | 21.33306755 | 17.429<br>39021 | 4.123450<br>19       | 0.00<br>1613 | 0.01<br>8976 | Up   |
| HRCT1    | 541.70<br>26394 | 742.3425563 | 341.0627224 | 0.4594<br>41156 | -<br>1.122047<br>997 | 0.00<br>2063 | 0.02<br>2868 | Down |
| HS2ST1   | 119.45<br>825   | 175.8534287 | 63.06307142 | 0.3586<br>11554 | -<br>1.479506<br>122 | 0.00<br>1136 | 0.01<br>4612 | Down |
| HS3ST1   | 473.01<br>94687 | 222.1086203 | 723.9303172 | 3.2593<br>52637 | 1.704585<br>449      | 6.46<br>E-06 | 0.00<br>0207 | Up   |
| HS3ST2   | 76.974<br>49301 | 143.9864356 | 9.962550429 | 0.0691<br>90896 | -<br>3.853273<br>975 | 0.00<br>4393 | 0.04<br>0285 | Down |
| HS3ST3B1 | 20.672<br>45505 | 7.700032521 | 33.64487759 | 4.3694<br>46168 | 2.127450<br>428      | 0.01<br>2963 | 0.08<br>9079 | Up   |
| HS3ST6   | 105.30<br>53734 | 37.9350104  | 172.6757365 | 4.5518<br>83198 | 2.186463<br>538      | 5.45<br>E-06 | 0.00<br>018  | Up   |
| HS6ST2   | 112.03<br>78009 | 53.19787389 | 170.877728  | 3.2121<br>15739 | 1.683523<br>877      | 0.00<br>3218 | 0.03<br>208  | Up   |
| HSD11B1  | 131.61<br>49021 | 250.910422  | 12.31938214 | 0.0490<br>98726 | -<br>4.348170<br>591 | 0.00<br>0652 | 0.00<br>9423 | Down |
| HSD17B14 | 85.257<br>97426 | 50.26613619 | 120.2498123 | 2.3922<br>62892 | 1.258375<br>94       | 0.02<br>8995 | 0.15<br>7795 | Up   |
| HSPA12A  | 520.30<br>55103 | 861.7927013 | 178.8183193 | 0.2074<br>95746 | -<br>2.268846<br>337 | 0.00<br>0121 | 0.00<br>241  | Down |
| HSPA12B  | 775.41<br>41884 | 1096.82936  | 453.9990168 | 0.4139<br>1946  | -<br>1.272578<br>017 | 0.00<br>0277 | 0.00<br>4775 | Down |
| HSPA13   | 710.55<br>60426 | 953.983202  | 467.1288832 | 0.4896<br>61539 | -<br>1.030143<br>212 | 0.00<br>4575 | 0.04<br>1592 | Down |
| HSPA2    | 1125.9<br>72996 | 1736.885902 | 515.0600894 | 0.2965<br>42271 | -<br>1.753690<br>326 | 0.00<br>2142 | 0.02<br>3551 | Down |
| HSPA4L   | 191.69<br>05988 | 121.2625466 | 262.1186511 | 2.1615<br>79634 | 1.112085<br>987      | 0.00<br>7893 | 0.06<br>2334 | Up   |
| HSPA6    | 97.408<br>51331 | 44.00227021 | 150.8147564 | 3.4274<br>31259 | 1.777127<br>732      | 0.00<br>0208 | 0.00<br>3836 | Up   |
| HSPB6    | 5098.7<br>57244 | 9170.753203 | 1026.761285 | 0.1119<br>6041  | -<br>3.158939<br>424 | 0.00<br>8532 | 0.06<br>5973 | Down |

|         |                 |             |             |                 |                      |              |              |          |
|---------|-----------------|-------------|-------------|-----------------|----------------------|--------------|--------------|----------|
| HSPB7   | 453.22<br>84395 | 786.4168362 | 120.0400427 | 0.1526<br>41751 | -<br>2.711778<br>471 | 0.04<br>3005 | 0.20<br>5571 | Dow<br>n |
| HSPG2   | 39229.<br>47217 | 56829.60078 | 21629.34355 | 0.3805<br>99956 | -<br>1.393652<br>7   | 7.17<br>E-05 | 0.00<br>1587 | Dow<br>n |
| HTR1D   | 17.820<br>31545 | 1.637787989 | 34.00284291 | 20.761<br>44357 | 4.375834<br>854      | 9.89<br>E-05 | 0.00<br>206  | Up       |
| HTR2A   | 120.11<br>74499 | 221.5005899 | 18.73430986 | 0.0845<br>79052 | -<br>3.563555<br>803 | 0.00<br>2129 | 0.02<br>3451 | Dow<br>n |
| HTRA1   | 9987.4<br>24634 | 14760.1993  | 5214.649967 | 0.3532<br>91298 | -<br>1.501069<br>882 | 0.00<br>1126 | 0.01<br>4532 | Dow<br>n |
| HYDIN   | 12.221<br>02239 | 1.175420702 | 23.26662408 | 19.794<br>29496 | 4.307012<br>777      | 0.00<br>0858 | 0.01<br>1726 | Up       |
| ID1     | 896.60<br>88856 | 1513.219788 | 279.9979828 | 0.1850<br>34577 | -<br>2.434133<br>209 | 0.00<br>2061 | 0.02<br>2854 | Dow<br>n |
| ID2     | 1616.4<br>93427 | 2332.861875 | 900.1249798 | 0.3858<br>4581  | -<br>1.373903<br>656 | 0.04<br>4493 | 0.21<br>063  | Dow<br>n |
| ID3     | 2053.8<br>79231 | 3299.306636 | 808.4518249 | 0.2450<br>36886 | -<br>2.028929<br>155 | 0.00<br>0216 | 0.00<br>3933 | Dow<br>n |
| IDH3A   | 1064.0<br>00977 | 1448.945845 | 679.0561084 | 0.4686<br>55271 | -<br>1.093400<br>985 | 0.00<br>3155 | 0.03<br>1629 | Dow<br>n |
| IER3    | 858.65<br>78111 | 1427.026072 | 290.2895498 | 0.2034<br>22737 | -<br>2.297447<br>152 | 0.01<br>4257 | 0.09<br>5789 | Dow<br>n |
| IFI44L  | 653.06<br>03374 | 292.8682397 | 1013.252435 | 3.4597<br>55268 | 1.790669<br>99       | 1.12<br>E-06 | 4.45<br>E-05 | Up       |
| IFITM10 | 18.512<br>9296  | 6.066774547 | 30.95908465 | 5.1030<br>55077 | 2.351361<br>213      | 0.01<br>0279 | 0.07<br>5277 | Up       |
| IFNLR1  | 45.988<br>17311 | 11.8343127  | 80.14203352 | 6.7720<br>05738 | 2.759583<br>196      | 1.66<br>E-05 | 0.00<br>0456 | Up       |
| IGF1    | 3026.1<br>75909 | 5149.967591 | 902.3842268 | 0.1752<br>21341 | -<br>2.512749<br>598 | 0.00<br>315  | 0.03<br>1606 | Dow<br>n |
| IGFALS  | 129.26<br>17605 | 182.2960149 | 76.22750609 | 0.4181<br>52345 | -<br>1.257899<br>442 | 0.00<br>4258 | 0.03<br>9365 | Dow<br>n |
| IGFBP2  | 864.41          | 1268.562301 | 460.2732332 | 0.3628          | -                    | 0.04         | 0.22         | Dow      |



|         |                 |             |             |                 |                      |              |              |          |
|---------|-----------------|-------------|-------------|-----------------|----------------------|--------------|--------------|----------|
|         | 77669           |             |             | 3061            | 1.462631<br>922      | 7311         | 0181         | n        |
| IGFBP4  | 10428.<br>48889 | 15751.36265 | 5105.615141 | 0.3241<br>37997 | -<br>1.625319<br>944 | 2.06<br>E-06 | 7.57<br>E-05 | Dow<br>n |
| IGFBP5  | 10749.<br>20679 | 16020.50219 | 5477.911389 | 0.3419<br>31315 | -<br>1.548221<br>539 | 0.01<br>617  | 0.10<br>4401 | Dow<br>n |
| IGFBP6  | 4290.6<br>47446 | 6672.373305 | 1908.921587 | 0.2860<br>93343 | -<br>1.805442<br>165 | 7.43<br>E-06 | 0.00<br>0231 | Dow<br>n |
| IGFN1   | 10.697<br>99462 | 1.734888514 | 19.66110074 | 11.332<br>77474 | 3.502429<br>232      | 0.01<br>504  | 0.09<br>933  | Up       |
| IGJ     | 1657.8<br>61015 | 503.9455232 | 2811.776508 | 5.5795<br>24726 | 2.480142<br>236      | 0.01<br>966  | 0.11<br>9976 | Up       |
| IGLL1   | 16281.<br>36858 | 4219.842414 | 28342.89474 | 6.7165<br>76583 | 2.747726<br>084      | 5.84<br>E-15 | 1.29<br>E-12 | Up       |
| IGLON5  | 78.704<br>75877 | 23.21419293 | 134.1953246 | 5.7807<br>44779 | 2.531255<br>379      | 2.78<br>E-06 | 9.91<br>E-05 | Up       |
| IGSF1   | 43.791<br>3437  | 79.70588043 | 7.876806973 | 0.0988<br>23411 | -<br>3.339003<br>338 | 0.00<br>3894 | 0.03<br>6674 | Dow<br>n |
| IGSF11  | 30.268<br>50561 | 49.5500377  | 10.98697352 | 0.2217<br>34918 | -<br>2.173092<br>12  | 0.03<br>215  | 0.16<br>9331 | Dow<br>n |
| IGSF3   | 1213.0<br>73627 | 651.308808  | 1774.838447 | 2.7250<br>33694 | 1.446274<br>068      | 6.44<br>E-05 | 0.00<br>1457 | Up       |
| IGSF5   | 336.20<br>05708 | 96.88184628 | 575.5192952 | 5.9404<br>2452  | 2.570566<br>034      | 2.83<br>E-10 | 2.74<br>E-08 | Up       |
| IGSF9   | 728.90<br>91584 | 217.5569    | 1240.261417 | 5.7008<br>59944 | 2.511179<br>558      | 3.26<br>E-11 | 3.73<br>E-09 | Up       |
| IGSF9B  | 60.336<br>81229 | 86.45157198 | 34.2220526  | 0.3958<br>52288 | -<br>1.336965<br>904 | 0.01<br>1721 | 0.08<br>2669 | Dow<br>n |
| IKBIP   | 980.07<br>57043 | 1431.16852  | 528.9828886 | 0.3696<br>16073 | -<br>1.435900<br>599 | 0.00<br>0106 | 0.00<br>2162 | Dow<br>n |
| IKBKE   | 1886.0<br>56114 | 1197.771467 | 2574.340762 | 2.1492<br>75412 | 1.103850<br>364      | 0.00<br>1449 | 0.01<br>7613 | Up       |
| IL12RB1 | 77.516<br>78239 | 44.41672719 | 110.6168376 | 2.4904<br>31974 | 1.316396<br>005      | 0.01<br>6207 | 0.10<br>4603 | Up       |
| IL13RA1 | 4669.2<br>85909 | 6705.446851 | 2633.124967 | 0.3926<br>84489 | -<br>1.348557<br>484 | 0.00<br>3512 | 0.03<br>417  | Dow<br>n |

|        |                 |             |             |                 |                      |              |              |      |
|--------|-----------------|-------------|-------------|-----------------|----------------------|--------------|--------------|------|
| IL15RA | 312.77<br>77756 | 183.7625825 | 441.7929686 | 2.4041<br>50848 | 1.265527<br>421      | 0.00<br>1121 | 0.01<br>4479 | Up   |
| IL17RE | 293.38<br>11313 | 134.5888206 | 452.173442  | 3.3596<br>65683 | 1.748317<br>679      | 1.41<br>E-05 | 0.00<br>0394 | Up   |
| IL18BP | 874.38<br>3007  | 474.1763297 | 1274.589684 | 2.6880<br>07824 | 1.426537<br>338      | 7.17<br>E-05 | 0.00<br>1587 | Up   |
| IL1RAP | 508.91<br>45372 | 331.7505764 | 686.0784979 | 2.0680<br>5518  | 1.048274<br>68       | 0.00<br>3796 | 0.03<br>6045 | Up   |
| IL1RN  | 355.33<br>22039 | 210.9964044 | 499.6680034 | 2.3681<br>35157 | 1.243751<br>423      | 0.03<br>3408 | 0.17<br>3938 | Up   |
| IL20RA | 169.51<br>72273 | 46.05001432 | 292.9844403 | 6.3623<br>09429 | 2.669550<br>539      | 2.33<br>E-08 | 1.40<br>E-06 | Up   |
| IL20RB | 144.12<br>38303 | 63.62417067 | 224.6234898 | 3.5304<br>7415  | 1.819861<br>953      | 4.19<br>E-05 | 0.00<br>1007 | Up   |
| IL21R  | 120.46<br>93356 | 62.66432119 | 178.27435   | 2.8449<br>09937 | 1.508382<br>981      | 0.00<br>0824 | 0.01<br>1384 | Up   |
| IL2RB  | 618.68<br>34195 | 255.7338167 | 981.6330223 | 3.8384<br>95178 | 1.940540<br>836      | 2.14<br>E-07 | 1.02<br>E-05 | Up   |
| IL2RG  | 530.26<br>20821 | 306.6771932 | 753.846971  | 2.4581<br>12269 | 1.297550<br>809      | 0.00<br>0369 | 0.00<br>6061 | Up   |
| IL33   | 1676.2<br>4604  | 2638.328379 | 714.163701  | 0.2706<br>8795  | -<br>1.885297<br>428 | 0.00<br>246  | 0.02<br>6121 | Down |
| IL34   | 2077.6<br>03133 | 711.4441252 | 3443.76214  | 4.8405<br>23687 | 2.275163<br>138      | 1.61<br>E-10 | 1.64<br>E-08 | Up   |
| IL6    | 60.842<br>70679 | 119.0712183 | 2.614195278 | 0.0219<br>54888 | -<br>5.509314<br>006 | 0.00<br>0352 | 0.00<br>5842 | Down |
| IL6ST  | 4691.8<br>3777  | 6629.475664 | 2754.199877 | 0.4154<br>47619 | -<br>1.267261<br>508 | 0.00<br>0248 | 0.00<br>4363 | Down |
| IL7    | 142.86<br>81048 | 76.50609312 | 209.2301164 | 2.7348<br>16377 | 1.451443<br>97       | 0.00<br>1082 | 0.01<br>4063 | Up   |
| ILDRI  | 203.16<br>30915 | 78.85435352 | 327.4718295 | 4.1528<br>69371 | 2.054108<br>492      | 2.02<br>E-06 | 7.44<br>E-05 | Up   |
| ILK    | 4734.7<br>28007 | 6598.719342 | 2870.736671 | 0.4350<br>44517 | -<br>1.200765<br>058 | 0.02<br>2394 | 0.13<br>1784 | Down |
| IMPA2  | 485.54<br>40164 | 274.4327769 | 696.6552558 | 2.5385<br>27881 | 1.343992<br>106      | 0.00<br>0413 | 0.00<br>6608 | Up   |
| IMPAD1 | 712.01<br>57102 | 1071.542603 | 352.4888175 | 0.3289<br>54553 | -<br>1.604039<br>816 | 1.10<br>E-05 | 0.00<br>0321 | Down |
| INADL  | 813.91          | 521.4664268 | 1106.362107 | 2.1216          | 1.085177             | 0.00         | 0.06         | Up   |

|        |                 |             |             |                 |                      |              |              |          |
|--------|-----------------|-------------|-------------|-----------------|----------------------|--------------|--------------|----------|
|        | 42669           |             |             | 36313           | 373                  | 91           | 9283         |          |
| INHBA  | 1010.4<br>81159 | 1848.232315 | 172.7300025 | 0.0934<br>56867 | -<br>3.419555<br>509 | 0.03<br>368  | 0.17<br>4754 | Dow<br>n |
| INO80D | 86.155<br>21404 | 118.5232739 | 53.78715414 | 0.4538<br>10904 | -<br>1.139836<br>82  | 0.02<br>0446 | 0.12<br>3529 | Dow<br>n |
| INPP4B | 785.02<br>78662 | 1068.30319  | 501.7525425 | 0.4696<br>72418 | -<br>1.090273<br>222 | 0.03<br>681  | 0.18<br>5586 | Dow<br>n |
| INPP5B | 1873.0<br>74733 | 1211.689995 | 2534.459471 | 2.0916<br>73185 | 1.064657<br>454      | 0.00<br>197  | 0.02<br>2053 | Up       |
| INPP5J | 29.417<br>47643 | 16.1090737  | 42.72587916 | 2.6522<br>86528 | 1.407236<br>639      | 0.04<br>7137 | 0.21<br>9598 | Up       |
| INSR   | 2184.0<br>8567  | 1435.68045  | 2932.490889 | 2.0425<br>79104 | 1.030391<br>952      | 0.00<br>2857 | 0.02<br>9336 | Up       |
| IQCB1  | 325.36<br>84296 | 211.039157  | 439.6977021 | 2.0834<br>88715 | 1.059001<br>286      | 0.00<br>4817 | 0.04<br>3318 | Up       |
| IQGAP2 | 1847.0<br>17776 | 924.0427368 | 2769.992815 | 2.9976<br>89073 | 1.583850<br>751      | 7.32<br>E-06 | 0.00<br>0228 | Up       |
| IQGAP3 | 226.51<br>97484 | 307.6799128 | 145.3595841 | 0.4724<br>3768  | -<br>1.081804<br>062 | 0.01<br>6539 | 0.10<br>6164 | Dow<br>n |
| IQSEC1 | 978.56<br>68786 | 1339.697276 | 617.4364814 | 0.4608<br>77612 | -<br>1.117544<br>407 | 0.00<br>1516 | 0.01<br>8144 | Dow<br>n |
| IRAK3  | 198.89<br>77317 | 270.1320415 | 127.663422  | 0.4725<br>96369 | -<br>1.081319<br>55  | 0.01<br>0113 | 0.07<br>4419 | Dow<br>n |
| IRF6   | 790.68<br>87503 | 389.04213   | 1192.335371 | 3.0647<br>97559 | 1.615791<br>782      | 0.00<br>734  | 0.05<br>9175 | Up       |
| IRF7   | 631.30<br>11854 | 356.7840213 | 905.8183495 | 2.5388<br>42256 | 1.344170<br>76       | 0.00<br>0242 | 0.00<br>4268 | Up       |
| IRF8   | 533.83<br>41466 | 310.995033  | 756.6732602 | 2.4330<br>71849 | 1.282778<br>924      | 0.00<br>0487 | 0.00<br>7586 | Up       |
| IRX1   | 1220.4<br>0085  | 776.9376812 | 1663.86402  | 2.1415<br>66898 | 1.098666<br>744      | 0.04<br>2566 | 0.20<br>3796 | Up       |
| IRX4   | 617.66<br>63904 | 223.5057474 | 1011.827033 | 4.5270<br>7389  | 2.178578<br>854      | 1.28<br>E-08 | 8.26<br>E-07 | Up       |
| IRX6   | 18.412<br>29476 | 31.37431316 | 5.450276372 | 0.1737<br>17791 | -<br>2.525182<br>583 | 0.00<br>3933 | 0.03<br>6938 | Dow<br>n |
| ISCU   | 2144.8<br>24534 | 2896.139846 | 1393.509223 | 0.4811<br>60889 | -<br>1.055408        | 0.01<br>0482 | 0.07<br>6551 | Dow<br>n |

|          |                 |             |             |                 |                      |              |              |          |
|----------|-----------------|-------------|-------------|-----------------|----------------------|--------------|--------------|----------|
|          |                 |             |             |                 | 716                  |              |              |          |
| ISG12(B) | 22.083<br>93179 | 38.5847983  | 5.583065278 | 0.1446<br>95982 | -<br>2.788903<br>234 | 0.00<br>0739 | 0.01<br>0439 | Dow<br>n |
| ISL2     | 86.125<br>23477 | 158.9894734 | 13.26099613 | 0.0834<br>08013 | -<br>3.583670<br>193 | 0.00<br>1952 | 0.02<br>189  | Dow<br>n |
| ITGA1    | 3212.5<br>27293 | 5746.461373 | 678.5932123 | 0.1180<br>88884 | -<br>3.082054<br>924 | 0.00<br>4275 | 0.03<br>9497 | Dow<br>n |
| ITGA11   | 2215.9<br>7901  | 4243.650134 | 188.3078852 | 0.0443<br>74036 | -<br>4.494140<br>401 | 0.00<br>1756 | 0.02<br>0241 | Dow<br>n |
| ITGA2    | 224.56<br>43975 | 108.9830162 | 340.1457788 | 3.1210<br>89788 | 1.642049<br>862      | 7.51<br>E-05 | 0.00<br>1642 | Up       |
| ITGA5    | 8399.2<br>68866 | 14307.96615 | 2490.57158  | 0.1740<br>68876 | -<br>2.522269<br>83  | 0.00<br>9714 | 0.07<br>2439 | Dow<br>n |
| ITGA8    | 2374.9<br>51944 | 4126.582449 | 623.3214381 | 0.1510<br>50281 | -<br>2.726899<br>228 | 0.04<br>6038 | 0.21<br>5751 | Dow<br>n |
| ITGA9    | 561.39<br>22045 | 933.6219971 | 189.1624118 | 0.2026<br>11348 | -<br>2.303213<br>112 | 9.53<br>E-05 | 0.00<br>2005 | Dow<br>n |
| ITGB1    | 25890.<br>01899 | 37853.00744 | 13927.03055 | 0.3679<br>24017 | -<br>1.442520<br>242 | 0.00<br>5013 | 0.04<br>4736 | Dow<br>n |
| ITGB2    | 820.23<br>16828 | 517.0854648 | 1123.377901 | 2.1725<br>18814 | 1.119368<br>671      | 0.00<br>1241 | 0.01<br>5605 | Up       |
| ITGB5    | 5075.0<br>76225 | 7079.532948 | 3070.619503 | 0.4337<br>31932 | -<br>1.205124<br>434 | 0.00<br>2632 | 0.02<br>7507 | Dow<br>n |
| ITGB6    | 1521.6<br>66723 | 213.2051579 | 2830.128288 | 13.274<br>20179 | 3.730553<br>205      | 3.42<br>E-22 | 2.39<br>E-19 | Up       |
| ITGB7    | 1453.1<br>06995 | 946.1366022 | 1960.077389 | 2.0716<br>64265 | 1.050790<br>218      | 0.00<br>2293 | 0.02<br>4778 | Up       |
| ITGB8    | 104.33<br>58028 | 63.42303448 | 145.2485712 | 2.2901<br>54868 | 1.195445<br>162      | 0.01<br>0941 | 0.07<br>8801 | Up       |
| ITGBL1   | 1218.7<br>19922 | 2208.44377  | 228.9960743 | 0.1036<br>9115  | -<br>3.269635<br>328 | 0.03<br>2092 | 0.16<br>9075 | Dow<br>n |
| ITIH2    | 295.98<br>49999 | 21.53627476 | 570.4337251 | 26.487<br>11216 | 4.727218<br>653      | 0.00<br>2185 | 0.02<br>3894 | Up       |
| ITIH4    | 1579.8          | 1004.98566  | 2154.680581 | 2.1439          | 1.100299             | 0.02         | 0.12         | Up       |

|          |                 |             |             |                 |                      |              |              |          |
|----------|-----------------|-------------|-------------|-----------------|----------------------|--------------|--------------|----------|
|          | 33121           |             |             | 91369           | 098                  | 1229         | 7025         |          |
| ITIH5    | 3530.5<br>00057 | 6199.857152 | 861.1429614 | 0.1388<br>97226 | -<br>2.847910<br>306 | 0.00<br>0725 | 0.01<br>0249 | Dow<br>n |
| ITK      | 159.44<br>08394 | 95.49256122 | 223.3891175 | 2.3393<br>35281 | 1.226098<br>648      | 0.01<br>0772 | 0.07<br>8069 | Up       |
| ITPKA    | 41.709<br>1747  | 21.41375931 | 62.00459008 | 2.8955<br>49034 | 1.533836<br>928      | 0.01<br>6754 | 0.10<br>7141 | Up       |
| ITPRIPL2 | 1430.0<br>61016 | 2102.055068 | 758.0669645 | 0.3606<br>31354 | -<br>1.471403<br>263 | 3.11<br>E-05 | 0.00<br>0785 | Dow<br>n |
| ITSN1    | 1294.6<br>66472 | 1837.238314 | 752.09463   | 0.4093<br>61499 | -<br>1.288552<br>674 | 0.00<br>0242 | 0.00<br>4276 | Dow<br>n |
| JADE1    | 2502.0<br>62474 | 3491.812505 | 1512.312442 | 0.4331<br>02419 | -<br>1.207219<br>865 | 0.00<br>6183 | 0.05<br>1968 | Dow<br>n |
| JADE2    | 1694.8<br>00982 | 1109.759734 | 2279.842229 | 2.0543<br>56596 | 1.038686<br>627      | 0.00<br>215  | 0.02<br>3603 | Up       |
| JAG2     | 1704.6<br>57492 | 1070.096207 | 2339.218778 | 2.1859<br>89225 | 1.128286<br>29       | 0.00<br>1599 | 0.01<br>8893 | Up       |
| JAKMIP1  | 20.693<br>05853 | 9.589631853 | 31.79648521 | 3.3157<br>14899 | 1.729319<br>962      | 0.03<br>5013 | 0.18<br>0084 | Up       |
| JAM2     | 1219.7<br>74058 | 1661.31217  | 778.2359454 | 0.4684<br>46544 | -<br>1.094043<br>667 | 0.00<br>1532 | 0.01<br>8278 | Dow<br>n |
| JAM3     | 1754.2<br>04958 | 2500.31462  | 1008.095297 | 0.4031<br>87378 | -<br>1.310477<br>618 | 0.00<br>0145 | 0.00<br>281  | Dow<br>n |
| JAZF1    | 303.28<br>56362 | 541.1430199 | 65.42825259 | 0.1209<br>07505 | -<br>3.048024<br>292 | 0.00<br>2713 | 0.02<br>8159 | Dow<br>n |
| JPH2     | 2105.8<br>77696 | 3597.258562 | 614.4968306 | 0.1708<br>23648 | -<br>2.549420<br>386 | 0.03<br>0181 | 0.16<br>2061 | Dow<br>n |
| JUND     | 2903.0<br>56597 | 4143.623894 | 1662.4893   | 0.4012<br>16264 | -<br>1.317548<br>004 | 0.00<br>5917 | 0.05<br>0432 | Dow<br>n |
| KANK2    | 4035.5<br>90601 | 5589.856605 | 2481.324598 | 0.4438<br>97719 | -<br>1.171700<br>799 | 0.01<br>0964 | 0.07<br>8861 | Dow<br>n |
| KANK4    | 616.93<br>38734 | 235.1419902 | 998.7257566 | 4.2473<br>30542 | 2.086556<br>388      | 3.80<br>E-08 | 2.13<br>E-06 | Up       |
| KCNA2    | 21.604          | 40.25967139 | 2.949471984 | 0.0732          | -                    | 0.01         | 0.10         | Dow      |

|        |                 |             |             |                 |                      |              |              |      |
|--------|-----------------|-------------|-------------|-----------------|----------------------|--------------|--------------|------|
|        | 57169           |             |             | 61204           | 3.770806<br>786      | 5856         | 2959         | n    |
| KCNA4  | 29.788<br>96487 | 7.620412104 | 51.95751764 | 6.8182<br>03128 | 2.769391<br>581      | 0.00<br>0271 | 0.00<br>4683 | Up   |
| KCNA6  | 149.91<br>71349 | 250.3842208 | 49.45004903 | 0.1974<br>96667 | -<br>2.340099<br>79  | 0.00<br>2405 | 0.02<br>5759 | Down |
| KCNB1  | 274.46<br>89724 | 138.4994825 | 410.4384623 | 2.9634<br>65675 | 1.567285<br>347      | 0.00<br>1642 | 0.01<br>9211 | Up   |
| KCNB2  | 58.783<br>276   | 110.3776348 | 7.188917204 | 0.0651<br>30198 | -<br>3.940529<br>578 | 7.77<br>E-06 | 0.00<br>024  | Down |
| KCNC1  | 4.1277<br>27302 | 0           | 8.255454604 | Inf             | Inf                  | 0.02<br>4346 | 0.13<br>974  | Up   |
| KCNC4  | 268.66<br>63942 | 365.0189729 | 172.3138154 | 0.4720<br>68107 | -<br>1.082933<br>078 | 0.00<br>4665 | 0.04<br>2284 | Down |
| KCNE1L | 18.574<br>52768 | 35.5665342  | 1.58252116  | 0.0444<br>94669 | -<br>4.490223<br>702 | 0.00<br>0623 | 0.00<br>9095 | Down |
| KCNE2  | 24.315<br>13877 | 1.219440949 | 47.4108366  | 38.879<br>15739 | 5.280925<br>047      | 4.03<br>E-05 | 0.00<br>0975 | Up   |
| KCNE3  | 373.70<br>97122 | 84.52974812 | 662.8896763 | 7.8420<br>87443 | 2.971237<br>729      | 1.43<br>E-13 | 2.47<br>E-11 | Up   |
| KCNE4  | 396.36<br>67853 | 613.0664488 | 179.6671219 | 0.2930<br>63048 | -<br>1.770717<br>025 | 0.00<br>116  | 0.01<br>482  | Down |
| KCNG1  | 662.75<br>3708  | 1318.087784 | 7.419631734 | 0.0056<br>29088 | -<br>7.472883<br>16  | 0.01<br>138  | 0.08<br>0874 | Down |
| KCNG2  | 27.466<br>57004 | 3.658322848 | 51.27481724 | 14.015<br>93554 | 3.808996<br>14       | 6.09<br>E-06 | 0.00<br>0196 | Up   |
| KCNH1  | 5.7205<br>90467 | 10.87850797 | 0.56267296  | 0.0517<br>23358 | -<br>4.273040<br>254 | 0.01<br>5293 | 0.10<br>0472 | Down |
| KCNJ11 | 27.051<br>75329 | 3.689393003 | 50.41411358 | 13.664<br>6092  | 3.772372<br>295      | 7.41<br>E-06 | 0.00<br>0231 | Up   |
| KCNJ8  | 599.45<br>42556 | 861.3343601 | 337.574151  | 0.3919<br>19987 | -<br>1.351368<br>947 | 0.01<br>4776 | 0.09<br>8198 | Down |
| KCNK1  | 406.31<br>30949 | 229.636561  | 582.9896288 | 2.5387<br>49171 | 1.344117<br>863      | 0.04<br>1974 | 0.20<br>1862 | Up   |
| KCNK12 | 141.15<br>80779 | 273.7796859 | 8.536470012 | 0.0311<br>80071 | -<br>5.003231        | 9.37<br>E-05 | 0.00<br>1976 | Down |

|          |                 |             |             |                 |                      |              |              |      |
|----------|-----------------|-------------|-------------|-----------------|----------------------|--------------|--------------|------|
|          |                 |             |             |                 | 982                  |              |              |      |
| KCNK2    | 184.13<br>23106 | 81.79734337 | 286.4672778 | 3.5021<br>58701 | 1.808244<br>461      | 2.76<br>E-05 | 0.00<br>0707 | Up   |
| KCNK7    | 45.563<br>35807 | 16.66805625 | 74.45865989 | 4.4671<br>47144 | 2.159353<br>777      | 0.00<br>0547 | 0.00<br>8247 | Up   |
| KCNN2    | 47.723<br>79252 | 27.76326066 | 67.68432437 | 2.4379<br>09768 | 1.285644<br>73       | 0.03<br>0682 | 0.16<br>3785 | Up   |
| KCNQ3    | 8.6401<br>35185 | 15.91663782 | 1.363632548 | 0.0856<br>73404 | -<br>3.545008<br>772 | 0.00<br>9118 | 0.06<br>9303 | Down |
| KCNQ5    | 116.54<br>31739 | 53.44223568 | 179.6441122 | 3.3614<br>63268 | 1.749089<br>385      | 0.00<br>0192 | 0.00<br>3563 | Up   |
| KCNS3    | 80.072<br>29294 | 116.4129043 | 43.73168161 | 0.3756<br>60086 | -<br>1.412500<br>258 | 0.00<br>4338 | 0.03<br>9942 | Down |
| KCNT1    | 210.27<br>03249 | 110.2290936 | 310.3115561 | 2.8151<br>51118 | 1.493212<br>369      | 0.00<br>0233 | 0.00<br>4142 | Up   |
| KCTD1    | 1054.4<br>87308 | 291.7027823 | 1817.271833 | 6.2298<br>74871 | 2.639203<br>187      | 1.32<br>E-12 | 1.94<br>E-10 | Up   |
| KCTD10   | 2708.6<br>08037 | 3761.83082  | 1655.385254 | 0.4400<br>47768 | -<br>1.184267<br>957 | 0.00<br>0969 | 0.01<br>2928 | Down |
| KCTD15   | 716.49<br>16208 | 1108.71046  | 324.2727812 | 0.2924<br>77426 | -<br>1.773602<br>818 | 0.01<br>3769 | 0.09<br>3306 | Down |
| KCTD9    | 808.09<br>37426 | 1164.770473 | 451.4170118 | 0.3875<br>5877  | -<br>1.367512<br>996 | 0.00<br>1622 | 0.01<br>9037 | Down |
| KDELC2   | 1457.0<br>25938 | 2012.603674 | 901.4482016 | 0.4479<br>01499 | -<br>1.158746<br>602 | 0.00<br>1291 | 0.01<br>6111 | Down |
| KDELR2   | 4603.8<br>21536 | 6313.521072 | 2894.122    | 0.4584<br>00624 | -<br>1.125319<br>087 | 0.00<br>1012 | 0.01<br>3363 | Down |
| KDELR3   | 2500.3<br>61766 | 4003.874401 | 996.8491312 | 0.2489<br>71129 | -<br>2.005949<br>638 | 2.43<br>E-08 | 1.45<br>E-06 | Down |
| KDF1     | 361.86<br>09597 | 126.8132416 | 596.9086779 | 4.7069<br>9014  | 2.234804<br>831      | 2.67<br>E-08 | 1.58<br>E-06 | Up   |
| KHDRBS3  | 452.77<br>9953  | 657.4810289 | 248.078877  | 0.3773<br>17164 | -<br>1.406150<br>367 | 0.00<br>0126 | 0.00<br>2494 | Down |
| KIAA0195 | 2323.9<br>29847 | 1547.240764 | 3100.61893  | 2.0039<br>66676 | 1.002858<br>518      | 0.00<br>3499 | 0.03<br>4083 | Up   |

|           |                 |             |             |                 |                      |              |              |      |
|-----------|-----------------|-------------|-------------|-----------------|----------------------|--------------|--------------|------|
| KIAA0319  | 55.618<br>90149 | 8.347055565 | 102.8907474 | 12.326<br>59189 | 3.623702<br>067      | 1.70<br>E-08 | 1.07<br>E-06 | Up   |
| KIAA0556  | 2111.2<br>24601 | 1070.217766 | 3152.231436 | 2.9454<br>11239 | 1.558469<br>078      | 0.00<br>0323 | 0.00<br>5422 | Up   |
| KIAA0754  | 413.61<br>0833  | 631.8504584 | 195.3712076 | 0.3092<br>04821 | -<br>1.693365<br>284 | 8.89<br>E-06 | 0.00<br>027  | Down |
| KIAA1211  | 184.93<br>09031 | 254.6773901 | 115.184416  | 0.4522<br>75783 | -<br>1.144725<br>345 | 0.01<br>7979 | 0.11<br>2943 | Down |
| KIAA1211L | 436.28<br>18032 | 138.8728255 | 733.6907808 | 5.2831<br>84655 | 2.401407<br>835      | 1.33<br>E-09 | 1.14<br>E-07 | Up   |
| KIAA1217  | 3276.7<br>20219 | 2096.962542 | 4456.477896 | 2.1252<br>06248 | 1.087602<br>859      | 0.01<br>1239 | 0.08<br>024  | Up   |
| KIAA1244  | 1221.6<br>41827 | 629.3537274 | 1813.929926 | 2.8822<br>10507 | 1.527175<br>709      | 0.00<br>0346 | 0.00<br>5754 | Up   |
| KIAA1324  | 250.95<br>31679 | 70.17453595 | 431.7317998 | 6.1522<br>57282 | 2.621115<br>837      | 1.09<br>E-05 | 0.00<br>0321 | Up   |
| KIAA1324L | 178.37<br>00153 | 323.4711246 | 33.26890609 | 0.1028<br>49694 | -<br>3.281390<br>597 | 0.00<br>3641 | 0.03<br>4992 | Down |
| KIAA1462  | 1190.3<br>1011  | 1725.914814 | 654.7054049 | 0.3793<br>38192 | -<br>1.398443<br>465 | 8.32<br>E-05 | 0.00<br>1791 | Down |
| KIAA1522  | 1665.5<br>64232 | 833.1162038 | 2498.01226  | 2.9983<br>9596  | 1.584190<br>914      | 9.55<br>E-06 | 0.00<br>0288 | Up   |
| KIAA1549L | 29.264<br>96372 | 5.6613776   | 52.86854984 | 9.3384<br>6028  | 3.223184<br>699      | 4.04<br>E-05 | 0.00<br>0976 | Up   |
| KIAA1614  | 364.97<br>11434 | 492.8080309 | 237.1342559 | 0.4811<br>89918 | -<br>1.055321<br>68  | 0.01<br>757  | 0.11<br>1029 | Down |
| KIAA1755  | 289.83<br>33236 | 75.75162961 | 503.9150176 | 6.6522<br>00358 | 2.733831<br>622      | 4.47<br>E-11 | 4.88<br>E-09 | Up   |
| KIAA2012  | 20.767<br>64306 | 3.548272231 | 37.98701389 | 10.705<br>77775 | 3.420317<br>703      | 0.00<br>0251 | 0.00<br>4399 | Up   |
| KIAA2022  | 73.854<br>18988 | 116.6911011 | 31.0172787  | 0.2658<br>06719 | -<br>1.911550<br>522 | 0.01<br>3496 | 0.09<br>1938 | Down |
| KIF13B    | 3856.9<br>22091 | 1803.879027 | 5909.965155 | 3.2762<br>536   | 1.712047<br>034      | 8.67<br>E-07 | 3.54<br>E-05 | Up   |
| KIF1A     | 1125.0<br>90931 | 247.1282277 | 2003.053635 | 8.1053<br>21087 | 3.018869<br>338      | 1.65<br>E-15 | 3.93<br>E-13 | Up   |
| KIF21A    | 232.21<br>89362 | 153.5179126 | 310.9199598 | 2.0253<br>00856 | 1.018136<br>234      | 0.02<br>2653 | 0.13<br>2925 | Up   |



|          |                 |             |             |                 |                      |              |              |      |
|----------|-----------------|-------------|-------------|-----------------|----------------------|--------------|--------------|------|
| KIF5A    | 21.600<br>1925  | 9.284740232 | 33.91564477 | 3.6528<br>37227 | 1.869017<br>468      | 0.02<br>4452 | 0.14<br>0127 | Up   |
| KIF7     | 907.81<br>32264 | 1214.169995 | 601.4564574 | 0.4953<br>6429  | -<br>1.013438<br>225 | 0.03<br>0033 | 0.16<br>1505 | Down |
| KIR2DL5A | 42.248<br>09293 | 10.47311103 | 74.02307483 | 7.0679<br>16557 | 2.821285<br>008      | 2.28<br>E-05 | 0.00<br>0604 | Up   |
| KIR2DS1  | 57.467<br>32049 | 16.06003818 | 98.8746028  | 6.1565<br>60881 | 2.622124<br>671      | 1.02<br>E-05 | 0.00<br>0301 | Up   |
| KIRREL   | 2916.0<br>00516 | 4200.621676 | 1631.379357 | 0.3883<br>66171 | -<br>1.364510<br>555 | 0.00<br>8745 | 0.06<br>7212 | Down |
| KIRREL3  | 87.712<br>02106 | 30.59735426 | 144.8266879 | 4.7333<br>07547 | 2.242848<br>664      | 1.20<br>E-05 | 0.00<br>0348 | Up   |
| KIT      | 1515.1<br>60446 | 839.4711188 | 2190.849774 | 2.6097<br>97674 | 1.383937<br>966      | 0.00<br>0105 | 0.00<br>2159 | Up   |
| KITLG    | 182.12<br>37095 | 261.6663977 | 102.5810213 | 0.3920<br>29784 | -<br>1.350964<br>83  | 0.00<br>1073 | 0.01<br>3967 | Down |
| KL       | 7.7755<br>94392 | 14.17998414 | 1.371204646 | 0.0967<br>00013 | -<br>3.370340<br>111 | 0.02<br>5219 | 0.14<br>3124 | Down |
| KLB      | 46.377<br>77565 | 92.20470426 | 0.550847042 | 0.0059<br>74175 | -<br>7.387044<br>778 | 8.68<br>E-05 | 0.00<br>1858 | Down |
| KLC3     | 130.80<br>68327 | 17.89996203 | 243.7137034 | 13.615<br>31957 | 3.767158<br>94       | 1.20<br>E-13 | 2.14<br>E-11 | Up   |
| KLF13    | 99.295<br>33708 | 133.4751725 | 65.11550161 | 0.4878<br>47293 | -<br>1.035498<br>472 | 0.02<br>8557 | 0.15<br>5851 | Down |
| KLF4     | 1528.5<br>60724 | 2464.111503 | 593.0099462 | 0.2406<br>58731 | -<br>2.054939<br>333 | 0.00<br>3811 | 0.03<br>6146 | Down |
| KLF5     | 726.11<br>91281 | 193.3880064 | 1258.85025  | 6.5094<br>53577 | 2.702536<br>444      | 6.55<br>E-12 | 8.43<br>E-10 | Up   |
| KLF6     | 2549.8<br>39847 | 3696.130944 | 1403.54875  | 0.3797<br>34585 | -<br>1.396936<br>694 | 6.27<br>E-05 | 0.00<br>1426 | Down |
| KLF7     | 1093.5<br>77998 | 1607.970525 | 579.1854705 | 0.3601<br>96572 | -<br>1.473143<br>645 | 4.03<br>E-05 | 0.00<br>0975 | Down |
| KLHL13   | 318.96<br>37037 | 200.7077104 | 437.219697  | 2.1783<br>90139 | 1.123262<br>357      | 0.00<br>4219 | 0.03<br>9075 | Up   |
| KLHL15   | 228.76          | 330.5950118 | 126.9258458 | 0.3839          | -                    | 0.00         | 0.01         | Down |

|        |                 |             |             |                 |                      |              |              |          |
|--------|-----------------|-------------|-------------|-----------------|----------------------|--------------|--------------|----------|
|        | 04288           |             |             | 31521           | 1.381079<br>083      | 0809         | 1251         | n        |
| KLHL3  | 264.45<br>13786 | 396.584024  | 132.3187332 | 0.3336<br>46151 | -<br>1.583609<br>234 | 7.57<br>E-05 | 0.00<br>1651 | Dow<br>n |
| KLHL30 | 39.479<br>82559 | 73.59547452 | 5.364176667 | 0.0728<br>87317 | -<br>3.778188<br>398 | 0.03<br>1711 | 0.16<br>77   | Dow<br>n |
| KLHL31 | 15.982<br>01863 | 30.03773176 | 1.926305509 | 0.0641<br>29526 | -<br>3.962867<br>439 | 0.04<br>5291 | 0.21<br>3407 | Dow<br>n |
| KLHL32 | 133.42<br>3848  | 221.2226733 | 45.6250226  | 0.2062<br>40264 | -<br>2.277602<br>078 | 0.00<br>9903 | 0.07<br>3322 | Dow<br>n |
| KLHL4  | 55.812<br>00214 | 103.6223016 | 8.00170271  | 0.0772<br>1989  | -<br>3.694883<br>694 | 1.69<br>E-09 | 1.43<br>E-07 | Dow<br>n |
| KLHL40 | 215.59<br>45628 | 111.4890616 | 319.700064  | 2.8675<br>4646  | 1.519816<br>861      | 0.01<br>887  | 0.11<br>6833 | Up       |
| KLHL6  | 138.77<br>19666 | 55.77964173 | 221.7642915 | 3.9757<br>20973 | 1.991216<br>508      | 0.00<br>0791 | 0.01<br>1043 | Up       |
| KLHL8  | 910.48<br>13398 | 531.3399619 | 1289.622718 | 2.4271<br>14108 | 1.279241<br>937      | 0.00<br>0288 | 0.00<br>4922 | Up       |
| KLK10  | 211.48<br>43639 | 321.6237671 | 101.3449606 | 0.3151<br>04078 | -<br>1.666099<br>669 | 4.89<br>E-05 | 0.00<br>1146 | Dow<br>n |
| KLK11  | 40.682<br>48843 | 16.04644813 | 65.31852872 | 4.0705<br>91085 | 2.025238<br>302      | 0.00<br>1909 | 0.02<br>1576 | Up       |
| KLK14  | 12.366<br>44923 | 22.2481738  | 2.484724648 | 0.1116<br>82184 | -<br>3.162529<br>031 | 0.00<br>4124 | 0.03<br>8277 | Dow<br>n |
| KLK7   | 690.41<br>05708 | 1090.124367 | 290.6967745 | 0.2666<br>63863 | -<br>1.906905<br>766 | 3.46<br>E-06 | 0.00<br>012  | Dow<br>n |
| KLK8   | 12.661<br>09715 | 20.61768068 | 4.704513628 | 0.2281<br>78606 | -<br>2.131764<br>566 | 0.04<br>1014 | 0.19<br>8559 | Dow<br>n |
| KLRD1  | 66.303<br>98934 | 27.7661802  | 104.8417985 | 3.7758<br>81224 | 1.916813<br>383      | 0.00<br>0525 | 0.00<br>8005 | Up       |
| KLRF2  | 7.5157<br>29925 | 14.7813473  | 0.250112546 | 0.0169<br>20822 | -<br>5.885056<br>538 | 0.01<br>9382 | 0.11<br>8718 | Dow<br>n |
| KLRK1  | 109.92<br>41608 | 58.30443923 | 161.5438824 | 2.7706<br>961   | 1.470248<br>479      | 0.00<br>1784 | 0.02<br>0502 | Up       |

|         |                 |             |             |                 |                      |              |              |          |
|---------|-----------------|-------------|-------------|-----------------|----------------------|--------------|--------------|----------|
| KPNA3   | 429.00<br>11732 | 585.2848127 | 272.7175338 | 0.4659<br>56963 | -<br>1.101731<br>385 | 0.00<br>3807 | 0.03<br>6134 | Dow<br>n |
| KRBA1   | 871.08<br>71039 | 519.2712968 | 1222.902911 | 2.3550<br>36603 | 1.235749<br>483      | 0.00<br>0515 | 0.00<br>7903 | Up       |
| KREMEN2 | 21.836<br>07798 | 10.67637211 | 32.99578385 | 3.0905<br>42697 | 1.627860<br>197      | 0.04<br>5754 | 0.21<br>4809 | Up       |
| KRT14   | 1267.8<br>40007 | 275.3650697 | 2260.314944 | 8.2084<br>30162 | 3.037106<br>337      | 8.91<br>E-16 | 2.28<br>E-13 | Up       |
| KRT15   | 5443.3<br>92585 | 2100.963855 | 8785.821316 | 4.1818<br>05078 | 2.064125<br>817      | 3.36<br>E-05 | 0.00<br>0839 | Up       |
| KRT17   | 3002.5<br>06192 | 912.4167897 | 5092.595595 | 5.5814<br>35647 | 2.480636<br>257      | 1.13<br>E-11 | 1.41<br>E-09 | Up       |
| KRT18   | 2512.5<br>6573  | 356.4472428 | 4668.684216 | 13.097<br>82671 | 3.711255<br>544      | 2.26<br>E-22 | 1.64<br>E-19 | Up       |
| KRT5    | 8479.0<br>369   | 2160.44425  | 14797.62955 | 6.8493<br>45706 | 2.775966<br>179      | 2.39<br>E-14 | 4.56<br>E-12 | Up       |
| KRT6A   | 8.9141<br>25181 | 0.391806901 | 17.43644346 | 44.502<br>64512 | 5.475819<br>183      | 0.00<br>1442 | 0.01<br>7533 | Up       |
| KRT7    | 7461.1<br>50346 | 1260.534429 | 13661.76626 | 10.838<br>07466 | 3.438036<br>586      | 2.13<br>E-20 | 1.14<br>E-17 | Up       |
| KRT8    | 6144.1<br>87629 | 841.2712617 | 11447.104   | 13.606<br>91197 | 3.766267<br>785      | 1.77<br>E-23 | 1.65<br>E-20 | Up       |
| KRTCAP3 | 362.07<br>44053 | 224.8231799 | 499.3256307 | 2.2209<br>70413 | 1.151190<br>174      | 0.00<br>7695 | 0.06<br>1298 | Up       |
| KYNU    | 105.19<br>13429 | 43.06799035 | 167.3146954 | 3.8848<br>96741 | 1.957876<br>253      | 0.00<br>9036 | 0.06<br>9013 | Up       |
| LAD1    | 1011.2<br>02687 | 271.6981509 | 1750.707223 | 6.4435<br>74301 | 2.687861<br>185      | 1.26<br>E-12 | 1.86<br>E-10 | Up       |
| LAIR1   | 87.057<br>57444 | 42.01784994 | 132.0972989 | 3.1438<br>37658 | 1.652526<br>721      | 0.00<br>0938 | 0.01<br>2604 | Up       |
| LAMA1   | 112.35<br>91228 | 42.390081   | 182.3281646 | 4.3011<br>98777 | 2.104738<br>806      | 1.53<br>E-05 | 0.00<br>0421 | Up       |
| LAMA4   | 10099.<br>85932 | 15018.61391 | 5181.104725 | 0.3449<br>78888 | -<br>1.535420<br>021 | 0.00<br>0109 | 0.00<br>2205 | Dow<br>n |
| LAMB1   | 8311.2<br>92182 | 11757.44118 | 4865.143186 | 0.4137<br>92688 | -<br>1.273019<br>944 | 0.00<br>0181 | 0.00<br>3404 | Dow<br>n |
| LAMB2   | 15719.<br>72222 | 22187.61354 | 9251.830906 | 0.4169<br>81794 | -<br>1.261943<br>699 | 0.00<br>3783 | 0.03<br>5936 | Dow<br>n |
| LAMB3   | 2113.7<br>65381 | 716.5098851 | 3511.020877 | 4.9001<br>70884 | 2.292832<br>061      | 2.39<br>E-10 | 2.36<br>E-08 | Up       |

|         |             |             |             |             |              |          |          |      |
|---------|-------------|-------------|-------------|-------------|--------------|----------|----------|------|
| LAMC1   | 18428.07127 | 29093.87494 | 7762.267592 | 0.266800748 | -1.906165385 | 3.71E-08 | 2.10E-06 | Down |
| LAMC2   | 731.7998058 | 344.4303037 | 1119.169308 | 3.249334613 | 1.700144319  | 4.41E-06 | 0.000148 | Up   |
| LAMC3   | 339.7511007 | 70.69776364 | 608.8044377 | 8.611367692 | 3.10624239   | 9.60E-06 | 0.000288 | Up   |
| LANCL3  | 25.91212777 | 44.08417022 | 7.740085318 | 0.175575162 | -2.50983933  | 0.000988 | 0.013116 | Down |
| LAT     | 197.0930158 | 127.8654194 | 266.3206122 | 2.082819682 | 1.058537945  | 0.009102 | 0.069283 | Up   |
| LAT2    | 486.129867  | 308.9861101 | 663.273624  | 2.146613075 | 1.10206217   | 0.002436 | 0.02592  | Up   |
| LCA5    | 81.24149292 | 22.48803473 | 139.9949511 | 6.225308382 | 2.638145305  | 6.42E-07 | 2.72E-05 | Up   |
| LCAT    | 1181.254759 | 1648.612896 | 713.8966223 | 0.433028653 | -1.207465604 | 0.000569 | 0.008513 | Down |
| LCK     | 392.3109278 | 178.6917217 | 605.9301338 | 3.390924482 | 1.761678655  | 4.48E-06 | 0.00015  | Up   |
| LCN2    | 3676.390306 | 1243.978575 | 6108.802037 | 4.910697147 | 2.295927851  | 2.68E-05 | 0.00069  | Up   |
| LCNL1   | 80.9411847  | 26.32696859 | 135.5554008 | 5.148917939 | 2.364269277  | 5.63E-06 | 0.000183 | Up   |
| LDB2    | 898.672365  | 1504.370857 | 292.9738726 | 0.194748437 | -2.360316348 | 1.24E-08 | 8.12E-07 | Down |
| LDHA    | 971.0545967 | 1491.020263 | 451.0889308 | 0.30253709  | -1.724816074 | 1.27E-06 | 4.98E-05 | Down |
| LDHD    | 88.82019033 | 29.4180435  | 148.2223372 | 5.038483853 | 2.332989673  | 9.72E-05 | 0.002033 | Up   |
| LDLRAD1 | 970.9132822 | 52.59003169 | 1889.236533 | 35.92385233 | 5.166870162  | 2.74E-24 | 3.11E-21 | Up   |
| LEPREL2 | 2891.517485 | 3998.952708 | 1784.082261 | 0.446137374 | -1.164440083 | 0.003393 | 0.033294 | Down |
| LGALS1  | 7887.451044 | 12912.73006 | 2862.172032 | 0.221655066 | -2.173611759 | 0.000469 | 0.007369 | Down |
| LGALS12 | 31.08104355 | 61.61124006 | 0.550847042 | 0.008940691 | -6.805397993 | 0.005206 | 0.04584  | Down |

|        |                 |             |             |                 |                      |              |              |      |
|--------|-----------------|-------------|-------------|-----------------|----------------------|--------------|--------------|------|
| LGALS7 | 75.401<br>42847 | 23.79615613 | 127.0067008 | 5.3372<br>78009 | 2.416104<br>161      | 6.88<br>E-06 | 0.00<br>0217 | Up   |
| LGALSL | 1659.3<br>87683 | 2457.581    | 861.1943655 | 0.3504<br>23593 | -<br>1.512828<br>182 | 0.00<br>3016 | 0.03<br>0663 | Down |
| LGI2   | 157.95<br>23276 | 291.2050208 | 24.69963445 | 0.0848<br>18711 | -<br>3.559473<br>634 | 0.00<br>3367 | 0.03<br>3099 | Down |
| LGR5   | 107.80<br>39628 | 44.00971977 | 171.5982059 | 3.8990<br>97899 | 1.963140<br>378      | 4.01<br>E-05 | 0.00<br>0973 | Up   |
| LGR6   | 1042.9<br>6015  | 665.6144789 | 1420.305821 | 2.1338<br>26512 | 1.093442<br>884      | 0.03<br>003  | 0.16<br>1505 | Up   |
| LHB    | 72.651<br>60077 | 40.0018451  | 105.3013564 | 2.6324<br>12485 | 1.396385<br>569      | 0.00<br>7797 | 0.06<br>184  | Up   |
| LHCGR  | 17.446<br>75342 | 34.08072134 | 0.812785506 | 0.0238<br>48835 | -<br>5.389937<br>385 | 1.47<br>E-06 | 5.71<br>E-05 | Down |
| LHFP   | 2688.6<br>39233 | 4260.361489 | 1116.916977 | 0.2621<br>64837 | -<br>1.931453<br>897 | 0.03<br>0402 | 0.16<br>2719 | Down |
| LIF    | 283.07<br>05963 | 498.3100888 | 67.83110368 | 0.1361<br>22276 | -<br>2.877024<br>911 | 0.04<br>5419 | 0.21<br>3843 | Down |
| LIG1   | 982.66<br>82902 | 590.9723697 | 1374.364211 | 2.3255<br>98084 | 1.217601<br>788      | 0.00<br>0646 | 0.00<br>9346 | Up   |
| LIMCH1 | 1197.5<br>40478 | 1853.251054 | 541.8299024 | 0.2923<br>67244 | -<br>1.774146<br>412 | 6.90<br>E-07 | 2.87<br>E-05 | Down |
| LIMS2  | 3212.5<br>67894 | 5040.274398 | 1384.86139  | 0.2747<br>59126 | -<br>1.863760<br>693 | 0.01<br>7208 | 0.10<br>9233 | Down |
| LIN7A  | 44.334<br>29284 | 77.70101017 | 10.96757551 | 0.1411<br>51003 | -<br>2.824688<br>716 | 0.02<br>3902 | 0.13<br>7931 | Down |
| LINGO3 | 6.8663<br>50545 | 0           | 13.73270109 | Inf             | Inf                  | 0.00<br>1887 | 0.02<br>1401 | Up   |
| LINGO4 | 6.1963<br>72899 | 0.827634049 | 11.56511175 | 13.973<br>70223 | 3.804642<br>397      | 0.02<br>9707 | 0.16<br>026  | Up   |
| LIPE   | 481.75<br>03217 | 887.674446  | 75.82619751 | 0.0854<br>21179 | -<br>3.549262<br>384 | 0.04<br>25   | 0.20<br>3617 | Down |
| LIPG   | 772.62<br>38292 | 1483.072931 | 62.17472784 | 0.0419<br>22907 | -<br>4.576117<br>447 | 0.03<br>3019 | 0.17<br>2421 | Down |

|                  |                 |             |             |                 |                      |              |              |      |
|------------------|-----------------|-------------|-------------|-----------------|----------------------|--------------|--------------|------|
| LIPH             | 94.273<br>15194 | 16.41624491 | 172.130059  | 10.485<br>34911 | 3.390302<br>992      | 2.35<br>E-07 | 1.11<br>E-05 | Up   |
| LIX1L            | 1023.4<br>82239 | 1533.955261 | 513.0092171 | 0.3344<br>3558  | -<br>1.580199<br>754 | 1.06<br>E-05 | 0.00<br>0311 | Down |
| LLGL2            | 1204.7<br>34126 | 645.6508724 | 1763.81738  | 2.7318<br>43873 | 1.449875<br>035      | 0.00<br>0755 | 0.01<br>0623 | Up   |
| LMAN1            | 1215.6<br>39247 | 1818.417666 | 612.860827  | 0.3370<br>29737 | -<br>1.569052<br>207 | 9.76<br>E-06 | 0.00<br>0291 | Down |
| LMAN1L           | 34.094<br>84057 | 16.6748367  | 51.51484445 | 3.0893<br>76249 | 1.627315<br>585      | 0.01<br>3049 | 0.08<br>95   | Up   |
| LMBR1L           | 627.19<br>98831 | 382.5057367 | 871.8940294 | 2.2794<br>27328 | 1.188671<br>415      | 0.00<br>1133 | 0.01<br>4586 | Up   |
| LMNTD2           | 12.084<br>81959 | 2.394861652 | 21.77477752 | 9.0922<br>90364 | 3.184643<br>758      | 0.00<br>6916 | 0.05<br>6377 | Up   |
| LMX1A            | 48.082<br>05902 | 86.83426054 | 9.329857503 | 0.1074<br>44429 | -<br>3.218337<br>42  | 0.03<br>3156 | 0.17<br>3062 | Down |
| LMX1B            | 472.80<br>075   | 114.3779927 | 831.2235072 | 7.2673<br>37778 | 2.861426<br>963      | 4.09<br>E-13 | 6.51<br>E-11 | Up   |
| LNP1             | 134.73<br>32576 | 180.0539442 | 89.41257086 | 0.4965<br>87682 | -<br>1.009879<br>619 | 0.02<br>0224 | 0.12<br>2392 | Down |
| LNPEP            | 561.64<br>95194 | 787.9231681 | 335.3758708 | 0.4256<br>45398 | -<br>1.232276<br>061 | 0.01<br>8163 | 0.11<br>3787 | Down |
| LOC100126<br>544 | 179.74<br>70163 | 109.7270814 | 249.7669513 | 2.2762<br>56217 | 1.186662<br>958      | 0.00<br>4067 | 0.03<br>7867 | Up   |
| LOC100137<br>797 | 152.20<br>79568 | 263.3605541 | 41.05535953 | 0.1558<br>90314 | -<br>2.681396<br>802 | 0.00<br>2124 | 0.02<br>3417 | Down |
| LOC100138<br>381 | 12.939<br>34537 | 2.069085122 | 23.80960562 | 11.507<br>31083 | 3.524478<br>821      | 0.00<br>2209 | 0.02<br>4118 | Up   |
| LOC100138<br>645 | 15.643<br>13841 | 25.22663828 | 6.059638533 | 0.2402<br>07929 | -<br>2.057644<br>322 | 0.04<br>4611 | 0.21<br>0989 | Down |
| LOC100139<br>049 | 10.523<br>81864 | 3.178475453 | 17.86916182 | 5.6219<br>28526 | 2.491065<br>112      | 0.03<br>9603 | 0.19<br>4376 | Up   |
| LOC100139<br>101 | 14.073<br>36771 | 1.589237727 | 26.55749768 | 16.710<br>8402  | 4.062712<br>367      | 0.00<br>0553 | 0.00<br>8314 | Up   |
| LOC100139<br>363 | 52.309<br>63936 | 75.99241072 | 28.626868   | 0.3767<br>06933 | -<br>1.408485<br>508 | 0.01<br>1735 | 0.08<br>2703 | Down |

|                  |                 |             |             |                 |                      |              |              |          |
|------------------|-----------------|-------------|-------------|-----------------|----------------------|--------------|--------------|----------|
| LOC100139<br>916 | 121.52<br>68077 | 63.01226253 | 180.0413528 | 2.8572<br>43108 | 1.514623<br>793      | 0.00<br>0909 | 0.01<br>2286 | Up       |
| LOC100141<br>258 | 164.27<br>12827 | 101.2508847 | 227.2916807 | 2.2448<br>36492 | 1.166610<br>367      | 0.00<br>5542 | 0.04<br>7868 | Up       |
| LOC100196<br>902 | 22.990<br>13143 | 11.70726724 | 34.27299562 | 2.9274<br>97504 | 1.549667<br>941      | 0.04<br>8336 | 0.22<br>3808 | Up       |
| LOC100295<br>719 | 9.2622<br>17194 | 1.981044628 | 16.54338976 | 8.3508<br>41536 | 3.061921<br>589      | 0.02<br>2168 | 0.13<br>0762 | Up       |
| LOC100295<br>741 | 511.38<br>13047 | 6.334940783 | 1016.427669 | 160.44<br>78563 | 7.325960<br>704      | 0.00<br>06   | 0.00<br>8838 | Up       |
| LOC100297<br>152 | 61.948<br>16998 | 91.38563701 | 32.51070295 | 0.3557<br>52873 | -<br>1.491052<br>686 | 0.00<br>6336 | 0.05<br>2915 | Dow<br>n |
| LOC100297<br>621 | 7.5726<br>76808 | 14.31317009 | 0.832183522 | 0.0581<br>41105 | -<br>4.104297<br>704 | 0.03<br>944  | 0.19<br>3992 | Dow<br>n |
| LOC100299<br>025 | 156.41<br>41033 | 101.818647  | 211.0095596 | 2.0724<br>05849 | 1.051306<br>56       | 0.01<br>5166 | 0.09<br>9836 | Up       |
| LOC100299<br>144 | 19.543<br>90313 | 6.400971154 | 32.68683511 | 5.1065<br>43105 | 2.352346<br>983      | 0.00<br>9043 | 0.06<br>9037 | Up       |
| LOC100299<br>281 | 3751.3<br>67373 | 1629.657956 | 5873.076789 | 3.6038<br>70841 | 1.849547<br>308      | 1.07<br>E-06 | 4.26<br>E-05 | Up       |
| LOC100300<br>091 | 144.76<br>33426 | 11.3227552  | 278.20393   | 24.570<br>33868 | 4.618845<br>839      | 9.95<br>E-19 | 4.01<br>E-16 | Up       |
| LOC100300<br>510 | 497.07<br>57709 | 240.4490978 | 753.7024439 | 3.1345<br>6133  | 1.648263<br>558      | 2.40<br>E-05 | 0.00<br>063  | Up       |
| LOC100300<br>716 | 235.08<br>10272 | 14.38841519 | 455.7736392 | 31.676<br>43088 | 4.985337<br>885      | 0.00<br>0157 | 0.00<br>3016 | Up       |
| LOC100300<br>760 | 174.86<br>90166 | 71.53913446 | 278.1988988 | 3.8887<br>65233 | 1.959312<br>141      | 4.62<br>E-06 | 0.00<br>0154 | Up       |
| LOC100300<br>806 | 15.520<br>71468 | 1.272521227 | 29.76890813 | 23.393<br>64365 | 4.548044<br>679      | 8.59<br>E-05 | 0.00<br>1845 | Up       |
| LOC100301<br>381 | 8.7540<br>20558 | 0           | 17.50804112 | Inf             | Inf                  | 0.00<br>0328 | 0.00<br>5492 | Up       |
| LOC100335<br>177 | 91.735<br>69925 | 40.01430993 | 143.4570886 | 3.5851<br>44635 | 1.842031<br>323      | 0.00<br>0231 | 0.00<br>4124 | Up       |
| LOC100335<br>205 | 315.57<br>02486 | 138.5743758 | 492.5661215 | 3.5545<br>25276 | 1.829656<br>894      | 3.82<br>E-06 | 0.00<br>013  | Up       |
| LOC100335<br>509 | 16.707<br>27738 | 6.432041308 | 26.98251344 | 4.1950<br>15571 | 2.068676<br>166      | 0.02<br>9413 | 0.15<br>922  | Up       |
| LOC100335<br>643 | 13.228<br>19816 | 1.633257974 | 24.82313834 | 15.198<br>54104 | 3.925860<br>936      | 0.01<br>0529 | 0.07<br>6783 | Up       |
| LOC100335<br>848 | 211.52<br>42163 | 100.456504  | 322.5919287 | 3.2112<br>59759 | 1.683139<br>37       | 7.47<br>E-05 | 0.00<br>1639 | Up       |

|                  |                 |             |             |                 |                      |              |              |          |
|------------------|-----------------|-------------|-------------|-----------------|----------------------|--------------|--------------|----------|
| LOC100336<br>251 | 468.82<br>62877 | 644.6316695 | 293.0209058 | 0.4545<br>55554 | -<br>1.137471<br>468 | 0.00<br>6274 | 0.05<br>2542 | Dow<br>n |
| LOC100336<br>476 | 351.32<br>30588 | 208.6968904 | 493.9492272 | 2.3668<br>26004 | 1.242953<br>651      | 0.00<br>096  | 0.01<br>2852 | Up       |
| LOC100336<br>574 | 241.14<br>02596 | 339.0536612 | 143.226858  | 0.4224<br>31238 | -<br>1.243211<br>57  | 0.00<br>1767 | 0.02<br>0318 | Dow<br>n |
| LOC100336<br>747 | 349.45<br>87104 | 467.630817  | 231.2866037 | 0.4945<br>92305 | -<br>1.015688<br>301 | 0.00<br>7751 | 0.06<br>1609 | Dow<br>n |
| LOC100336<br>869 | 59.162<br>97889 | 19.55070012 | 98.77525766 | 5.0522<br>61918 | 2.336929<br>433      | 0.00<br>0191 | 0.00<br>3563 | Up       |
| LOC100336<br>949 | 6247.9<br>36978 | 9933.002118 | 2562.871839 | 0.2580<br>15835 | -<br>1.954468<br>483 | 0.04<br>8721 | 0.22<br>4785 | Dow<br>n |
| LOC100337<br>066 | 60.791<br>6154  | 13.80565735 | 107.7775735 | 7.8067<br>68686 | 2.964725<br>523      | 5.53<br>E-07 | 2.41<br>E-05 | Up       |
| LOC100337<br>129 | 44.956<br>47046 | 22.5751047  | 67.33783622 | 2.9828<br>36053 | 1.576684<br>684      | 0.04<br>9369 | 0.22<br>6339 | Up       |
| LOC100337<br>146 | 37.750<br>91199 | 61.99464806 | 13.50717593 | 0.2178<br>76484 | -<br>2.198417<br>606 | 0.00<br>0712 | 0.01<br>0117 | Dow<br>n |
| LOC100337<br>183 | 82.575<br>5248  | 135.8117045 | 29.33934515 | 0.2160<br>29578 | -<br>2.210699<br>243 | 0.02<br>8423 | 0.15<br>5303 | Dow<br>n |
| LOC100337<br>214 | 69.788<br>50259 | 17.58890077 | 121.9881044 | 6.9355<br>16099 | 2.794003<br>243      | 5.98<br>E-07 | 2.56<br>E-05 | Up       |
| LOC100337<br>223 | 7.6325<br>32705 | 1.567227603 | 13.69783781 | 8.7401<br>71357 | 3.127661<br>565      | 0.03<br>9534 | 0.19<br>4193 | Up       |
| LOC100337<br>430 | 256.82<br>49269 | 73.99908511 | 439.6507686 | 5.9413<br>00057 | 2.570778<br>652      | 0.00<br>0409 | 0.00<br>6564 | Up       |
| LOC100337<br>457 | 334.61<br>01615 | 488.5937945 | 180.6265285 | 0.3696<br>86497 | -<br>1.435625<br>744 | 0.01<br>8987 | 0.11<br>7365 | Dow<br>n |
| LOC100847<br>119 | 278.03<br>65311 | 63.43255062 | 492.6405116 | 7.7663<br>6769  | 2.957240<br>012      | 0.00<br>0947 | 0.01<br>2708 | Up       |
| LOC100847<br>265 | 179.95<br>1452  | 262.68935   | 97.21355403 | 0.3700<br>70405 | -<br>1.434128<br>331 | 0.00<br>1052 | 0.01<br>3771 | Dow<br>n |
| LOC100847<br>295 | 52.063<br>87145 | 77.48807826 | 26.63966464 | 0.3437<br>90493 | -<br>1.540398<br>444 | 0.00<br>6508 | 0.05<br>3898 | Dow<br>n |
| LOC100847        | 116.47          | 50.62690209 | 182.3210764 | 3.6012          | 1.848505             | 7.46         | 0.00         | Up       |



|                  |                 |             |             |                 |                      |              |              |      |
|------------------|-----------------|-------------|-------------|-----------------|----------------------|--------------|--------------|------|
| 319              | 39893           |             |             | 68671           | 235                  | E-05         | 1639         |      |
| LOC100847<br>724 | 184.46<br>2348  | 26.01785633 | 342.9068396 | 13.179<br>67304 | 3.720242<br>675      | 0.00<br>6592 | 0.05<br>4426 | Up   |
| LOC100847<br>951 | 35.712<br>50994 | 13.92087793 | 57.50414194 | 4.1307<br>84152 | 2.046415<br>676      | 0.00<br>2605 | 0.02<br>7304 | Up   |
| LOC100848<br>100 | 159.06<br>9001  | 313.8160688 | 4.321933248 | 0.0137<br>72186 | -<br>6.182098<br>627 | 0.01<br>4172 | 0.09<br>5398 | Down |
| LOC100848<br>461 | 161.71<br>02867 | 236.9387186 | 86.48185475 | 0.3649<br>96718 | -<br>1.454044<br>602 | 0.00<br>0703 | 0.01<br>0038 | Down |
| LOC100848<br>575 | 266.76<br>46095 | 99.99587269 | 433.5333464 | 4.3355<br>12404 | 2.116202<br>512      | 0.00<br>1228 | 0.01<br>5497 | Up   |
| LOC100848<br>815 | 4106.4<br>07931 | 1569.338274 | 6643.477589 | 4.2332<br>98645 | 2.081782<br>27       | 2.33<br>E-05 | 0.00<br>0616 | Up   |
| LOC100848<br>865 | 9.7176<br>02893 | 2.852698923 | 16.58250686 | 5.8129<br>18681 | 2.539262<br>726      | 0.04<br>1304 | 0.19<br>9593 | Up   |
| LOC100848<br>982 | 13.860<br>28473 | 25.13759811 | 2.582971344 | 0.1027<br>53307 | -<br>3.282743<br>264 | 0.04<br>5066 | 0.21<br>2566 | Down |
| LOC100849<br>074 | 287.13<br>73036 | 181.620356  | 392.6542511 | 2.1619<br>50674 | 1.112333<br>608      | 0.00<br>5016 | 0.04<br>4736 | Up   |
| LOC100850<br>276 | 287.40<br>68793 | 417.4995525 | 157.3142062 | 0.3768<br>00898 | -<br>1.408125<br>693 | 0.00<br>1891 | 0.02<br>1426 | Down |
| LOC100852<br>118 | 2965.1<br>48073 | 4575.683815 | 1354.612331 | 0.2960<br>45878 | -<br>1.756107<br>33  | 0.00<br>3543 | 0.03<br>4383 | Down |
| LOC101902<br>487 | 10.069<br>58129 | 2.438881899 | 17.70028069 | 7.2575<br>39077 | 2.859480<br>435      | 0.02<br>1913 | 0.12<br>9892 | Up   |
| LOC101902<br>537 | 68.433<br>22543 | 112.8576757 | 24.00877515 | 0.2127<br>34978 | -<br>2.232870<br>834 | 2.98<br>E-05 | 0.00<br>0755 | Down |
| LOC101902<br>550 | 21.920<br>22046 | 36.74487444 | 7.095566473 | 0.1931<br>03571 | -<br>2.372553<br>251 | 0.00<br>378  | 0.03<br>5925 | Down |
| LOC101903<br>023 | 84.172<br>22929 | 113.1522274 | 55.19223118 | 0.4877<br>69728 | -<br>1.035727<br>871 | 0.02<br>979  | 0.16<br>0628 | Down |
| LOC101903<br>326 | 402.97<br>30076 | 210.7864043 | 595.1596108 | 2.8235<br>19917 | 1.497494<br>808      | 7.63<br>E-05 | 0.00<br>166  | Up   |
| LOC101903<br>444 | 89.296<br>88922 | 11.78059247 | 166.813186  | 14.159<br>99971 | 3.823749<br>331      | 2.13<br>E-08 | 1.30<br>E-06 | Up   |
| LOC101903        | 161.95          | 75.8378546  | 248.0805852 | 3.2711          | 1.709818             | 0.00         | 0.00         | Up   |

|                  |                 |             |             |                 |                      |              |              |          |
|------------------|-----------------|-------------|-------------|-----------------|----------------------|--------------|--------------|----------|
| 503              | 92199           |             |             | 97301           | 777                  | 0101         | 2087         |          |
| LOC101903<br>806 | 70.346<br>76887 | 101.531361  | 39.16217672 | 0.3857<br>15077 | -<br>1.374392<br>556 | 0.00<br>8236 | 0.06<br>4447 | Dow<br>n |
| LOC101903<br>854 | 99.037<br>45812 | 47.45459629 | 150.62032   | 3.1739<br>88017 | 1.666296<br>681      | 0.00<br>0599 | 0.00<br>8838 | Up       |
| LOC101904<br>210 | 208.10<br>62407 | 289.8203321 | 126.3921493 | 0.4361<br>05184 | -<br>1.197251<br>955 | 0.00<br>3267 | 0.03<br>2447 | Dow<br>n |
| LOC101904<br>278 | 90.499<br>4464  | 121.2582677 | 59.74062514 | 0.4926<br>72593 | -<br>1.021298<br>877 | 0.03<br>3689 | 0.17<br>4754 | Dow<br>n |
| LOC101904<br>333 | 159.26<br>01934 | 104.0661891 | 214.4541978 | 2.0607<br>48065 | 1.043168<br>14       | 0.01<br>221  | 0.08<br>5098 | Up       |
| LOC101904<br>339 | 141.42<br>50357 | 93.06650388 | 189.7835674 | 2.0392<br>2528  | 1.028021<br>164      | 0.02<br>0925 | 0.12<br>5918 | Up       |
| LOC101904<br>616 | 194.25<br>50196 | 89.82071814 | 298.6893211 | 3.3253<br>94489 | 1.733525<br>497      | 4.13<br>E-05 | 0.00<br>0995 | Up       |
| LOC101904<br>653 | 5.8371<br>69131 | 0.805623925 | 10.86871434 | 13.491<br>05209 | 3.753930<br>955      | 0.03<br>9138 | 0.19<br>2986 | Up       |
| LOC101904<br>723 | 130.93<br>49265 | 15.7923572  | 246.0774958 | 15.582<br>06243 | 3.961814<br>295      | 0.00<br>0111 | 0.00<br>2238 | Up       |
| LOC101904<br>834 | 7.5204<br>09502 | 1.197430826 | 13.84338818 | 11.560<br>90847 | 3.531182<br>866      | 0.02<br>3752 | 0.13<br>742  | Up       |
| LOC101905<br>023 | 7.4226<br>38059 | 0.783613802 | 14.06166232 | 17.944<br>6333  | 4.165480<br>536      | 0.01<br>1987 | 0.08<br>4274 | Up       |
| LOC101905<br>035 | 25.190<br>59731 | 8.848913084 | 41.53228153 | 4.6934<br>896   | 2.230660<br>963      | 0.00<br>4781 | 0.04<br>303  | Up       |
| LOC101905<br>132 | 49.211<br>96129 | 20.99088225 | 77.43304033 | 3.6888<br>8927  | 1.883186<br>484      | 0.00<br>1829 | 0.02<br>0867 | Up       |
| LOC101905<br>134 | 17.313<br>50398 | 3.737943265 | 30.88906469 | 8.2636<br>52628 | 3.046779<br>61       | 0.00<br>1716 | 0.01<br>9896 | Up       |
| LOC101905<br>222 | 25.805<br>3376  | 12.78899222 | 38.82168298 | 3.0355<br>54508 | 1.601960<br>079      | 0.04<br>119  | 0.19<br>9149 | Up       |
| LOC101905<br>432 | 904.46<br>41863 | 544.220571  | 1264.707801 | 2.3238<br>8827  | 1.216540<br>707      | 0.00<br>049  | 0.00<br>7617 | Up       |
| LOC101905<br>478 | 225.15<br>03465 | 340.969174  | 109.3315191 | 0.3206<br>49277 | -<br>1.640931<br>94  | 0.04<br>0376 | 0.19<br>6997 | Dow<br>n |
| LOC101905<br>630 | 188.29<br>13415 | 251.5748208 | 125.0078621 | 0.4969<br>01326 | -<br>1.008968<br>703 | 0.04<br>7789 | 0.22<br>1907 | Dow<br>n |
| LOC101905<br>743 | 5.1027<br>92372 | 10.20558474 | 0           | 0               | #NAME?               | 0.00<br>4721 | 0.04<br>2616 | Dow<br>n |

|                  |                 |             |             |                 |                      |              |              |      |
|------------------|-----------------|-------------|-------------|-----------------|----------------------|--------------|--------------|------|
| LOC101905<br>790 | 209.22<br>248   | 125.0389804 | 293.4059796 | 2.3465<br>16091 | 1.230520<br>354      | 0.00<br>2622 | 0.02<br>7441 | Up   |
| LOC101905<br>813 | 52.545<br>75504 | 23.05832774 | 82.03318235 | 3.5576<br>37972 | 1.830919<br>708      | 0.00<br>1403 | 0.01<br>7227 | Up   |
| LOC101905<br>885 | 59.121<br>28569 | 92.12346539 | 26.11910599 | 0.2835<br>22834 | -<br>1.818463<br>165 | 0.00<br>1051 | 0.01<br>3771 | Down |
| LOC101905<br>937 | 299.84<br>6975  | 160.0475397 | 439.6464104 | 2.7469<br>73875 | 1.457843<br>19       | 0.00<br>0263 | 0.00<br>4571 | Up   |
| LOC101906<br>179 | 78.028<br>36072 | 27.65321004 | 128.4035114 | 4.6433<br>49224 | 2.215165<br>789      | 2.14<br>E-05 | 0.00<br>057  | Up   |
| LOC101906<br>282 | 20.824<br>63138 | 39.22273215 | 2.426530601 | 0.0618<br>65415 | -<br>4.014723<br>074 | 0.00<br>6561 | 0.05<br>4245 | Down |
| LOC101906<br>436 | 16.913<br>27946 | 31.45490409 | 2.37165483  | 0.0753<br>98571 | -<br>3.729319<br>003 | 0.00<br>2956 | 0.03<br>015  | Down |
| LOC101906<br>598 | 420.36<br>22336 | 41.33814626 | 799.3863209 | 19.337<br>73991 | 4.273347<br>285      | 9.55<br>E-09 | 6.56<br>E-07 | Up   |
| LOC101907<br>048 | 151.05<br>41523 | 66.12312629 | 235.9851782 | 3.5688<br>75089 | 1.835469<br>408      | 0.00<br>0443 | 0.00<br>703  | Up   |
| LOC101907<br>084 | 33.502<br>26084 | 48.7570333  | 18.24748838 | 0.3742<br>53459 | -<br>1.417912<br>443 | 0.03<br>5286 | 0.18<br>0956 | Down |
| LOC101907<br>185 | 6.9213<br>11169 | 12.72910234 | 1.113520002 | 0.0874<br>78282 | -<br>3.514931<br>304 | 0.02<br>1484 | 0.12<br>8135 | Down |
| LOC101907<br>229 | 87.436<br>58994 | 136.5096077 | 38.36357219 | 0.2810<br>3203  | -<br>1.831193<br>526 | 0.00<br>0211 | 0.00<br>3868 | Down |
| LOC101907<br>314 | 625.83<br>30494 | 866.9815015 | 384.6845972 | 0.4437<br>05657 | -<br>1.172325<br>146 | 0.00<br>0957 | 0.01<br>2825 | Down |
| LOC101907<br>390 | 83.301<br>41847 | 54.13051412 | 112.4723228 | 2.0777<br>98902 | 1.055056<br>031      | 0.03<br>5381 | 0.18<br>1044 | Up   |
| LOC101907<br>438 | 45.043<br>10229 | 16.50039534 | 73.58580924 | 4.4596<br>39161 | 2.156926<br>983      | 0.00<br>0629 | 0.00<br>9157 | Up   |
| LOC101908<br>130 | 15.757<br>15265 | 30.15067276 | 1.363632548 | 0.0452<br>27268 | -<br>4.466663<br>348 | 0.01<br>6305 | 0.10<br>5197 | Down |
| LOC101909<br>319 | 15.641<br>13158 | 5.98715413  | 25.29510904 | 4.2248<br>96919 | 2.078916<br>142      | 0.03<br>5435 | 0.18<br>1126 | Up   |
| LOC101909<br>551 | 32.488<br>00927 | 15.59879611 | 49.37722243 | 3.1654<br>50852 | 1.662410<br>996      | 0.01<br>6492 | 0.10<br>5979 | Up   |

|                  |                 |             |             |                 |                      |              |              |          |
|------------------|-----------------|-------------|-------------|-----------------|----------------------|--------------|--------------|----------|
| LOC101909<br>753 | 79.791<br>36305 | 123.089006  | 36.49372014 | 0.2964<br>82369 | -<br>1.753981<br>778 | 0.00<br>0464 | 0.00<br>73   | Dow<br>n |
| LOC104968<br>414 | 280.79<br>87741 | 476.1038061 | 85.49374212 | 0.1795<br>69541 | -<br>2.477385<br>434 | 0.00<br>9895 | 0.07<br>3322 | Dow<br>n |
| LOC104968<br>424 | 106.12<br>88446 | 65.34659435 | 146.9110948 | 2.2481<br>82882 | 1.168759<br>399      | 0.02<br>7016 | 0.14<br>9855 | Up       |
| LOC104968<br>426 | 125.32<br>0841  | 177.4894515 | 73.1522305  | 0.4121<br>49736 | -<br>1.278759<br>526 | 0.00<br>3313 | 0.03<br>2737 | Dow<br>n |
| LOC104968<br>434 | 19.832<br>90775 | 2.465422038 | 37.20039346 | 15.088<br>85411 | 3.915411<br>343      | 6.07<br>E-05 | 0.00<br>1392 | Up       |
| LOC104968<br>448 | 127.84<br>98295 | 53.78905181 | 201.9106072 | 3.7537<br>49144 | 1.908332<br>241      | 4.40<br>E-05 | 0.00<br>1046 | Up       |
| LOC104968<br>450 | 522.45<br>95784 | 103.3930227 | 941.5261341 | 9.1062<br>83084 | 3.186862<br>309      | 1.75<br>E-15 | 4.13<br>E-13 | Up       |
| LOC104968<br>484 | 191.36<br>53499 | 38.86151015 | 343.8691897 | 8.8485<br>80212 | 3.145445<br>988      | 1.43<br>E-12 | 2.04<br>E-10 | Up       |
| LOC104968<br>668 | 18.241<br>19467 | 6.225375427 | 30.25701391 | 4.8602<br>71362 | 2.281036<br>866      | 0.01<br>0957 | 0.07<br>8843 | Up       |
| LOC104968<br>697 | 10.279<br>00817 | 3.222495701 | 17.33552063 | 5.3795<br>32587 | 2.427480<br>826      | 0.04<br>6648 | 0.21<br>7683 | Up       |
| LOC104968<br>712 | 594.13<br>11995 | 833.9112508 | 354.3511481 | 0.4249<br>26691 | -<br>1.234714<br>129 | 0.00<br>0663 | 0.00<br>9547 | Dow<br>n |
| LOC104968<br>838 | 8.9815<br>31161 | 1.241451073 | 16.72161125 | 13.469<br>40819 | 3.751614<br>559      | 0.01<br>4773 | 0.09<br>8198 | Up       |
| LOC104968<br>894 | 5.1976<br>27889 | 10.39525578 | 0           | 0               | #NAME?               | 0.00<br>3644 | 0.03<br>5    | Dow<br>n |
| LOC104969<br>591 | 126.70<br>89075 | 218.5256929 | 34.89212204 | 0.1596<br>7057  | -<br>2.646829<br>667 | 1.80<br>E-08 | 1.13<br>E-06 | Dow<br>n |
| LOC104969<br>954 | 5.5456<br>20023 | 0.827634049 | 10.263606   | 12.401<br>14035 | 3.632400<br>885      | 0.04<br>9888 | 0.22<br>8025 | Up       |
| LOC104971<br>974 | 96.772<br>59502 | 154.2866654 | 39.25852465 | 0.2544<br>51832 | -<br>1.974535<br>517 | 0.03<br>0677 | 0.16<br>3785 | Dow<br>n |
| LOC104972<br>129 | 28.468<br>93567 | 45.49829748 | 11.43957387 | 0.2514<br>28614 | -<br>1.991779<br>25  | 0.00<br>5412 | 0.04<br>7171 | Dow<br>n |
| LOC104972<br>276 | 10.114<br>4254  | 0.783613802 | 19.445237   | 24.814<br>82199 | 4.633130<br>201      | 0.00<br>1586 | 0.01<br>8771 | Up       |
| LOC104972        | 100.71          | 137.8266344 | 63.60051485 | 0.4614          | -                    | 0.02         | 0.12         | Dow      |

|                  |                 |             |             |                 |                      |              |              |          |
|------------------|-----------------|-------------|-------------|-----------------|----------------------|--------------|--------------|----------|
| 294              | 35746           |             |             | 53007           | 1.115744<br>36       | 0972         | 6161         | n        |
| LOC104972<br>773 | 41.498<br>57552 | 21.87159658 | 61.12555446 | 2.7947<br>45881 | 1.482717<br>109      | 0.01<br>9341 | 0.11<br>8566 | Up       |
| LOC104972<br>835 | 90.213<br>54711 | 40.61764329 | 139.8094509 | 3.4420<br>86728 | 1.783283<br>449      | 0.00<br>0325 | 0.00<br>5465 | Up       |
| LOC104972<br>858 | 15.045<br>90963 | 2.958859479 | 27.13295978 | 9.1700<br>73797 | 3.196933<br>344      | 0.00<br>199  | 0.02<br>2195 | Up       |
| LOC104973<br>427 | 29.554<br>28142 | 11.1291941  | 47.97936874 | 4.3111<br>2696  | 2.108065<br>05       | 0.00<br>4678 | 0.04<br>2316 | Up       |
| LOC104973<br>704 | 48.425<br>61714 | 17.35909954 | 79.49213474 | 4.5792<br>77545 | 2.195120<br>008      | 0.00<br>0352 | 0.00<br>5842 | Up       |
| LOC104973<br>785 | 146.29<br>9698  | 56.9751527  | 235.6242434 | 4.1355<br>6142  | 2.048083<br>195      | 5.84<br>E-06 | 0.00<br>0189 | Up       |
| LOC104973<br>854 | 279.66<br>94091 | 385.7274297 | 173.6113884 | 0.4500<br>88262 | -<br>1.151720<br>154 | 0.00<br>2791 | 0.02<br>8794 | Dow<br>n |
| LOC104974<br>494 | 110.64<br>29181 | 147.7770322 | 73.50880398 | 0.4974<br>30507 | -<br>1.007433<br>106 | 0.02<br>6465 | 0.14<br>789  | Dow<br>n |
| LOC104974<br>623 | 14.743<br>04005 | 5.543392166 | 23.94268793 | 4.3191<br>40197 | 2.110744<br>146      | 0.02<br>9457 | 0.15<br>9382 | Up       |
| LOC104974<br>854 | 162.64<br>90621 | 66.22119734 | 259.0769268 | 3.9122<br>9602  | 1.968015<br>534      | 9.68<br>E-06 | 0.00<br>029  | Up       |
| LOC104975<br>409 | 16.151<br>25725 | 3.244505824 | 29.05800867 | 8.9560<br>66115 | 3.162865<br>178      | 0.00<br>1844 | 0.02<br>0993 | Up       |
| LOC104975<br>474 | 25.570<br>7796  | 40.33893209 | 10.80262712 | 0.2677<br>96557 | -<br>1.900790<br>683 | 0.01<br>0886 | 0.07<br>8555 | Dow<br>n |
| LOC104975<br>541 | 339.89<br>89528 | 673.4217739 | 6.376131697 | 0.0094<br>68259 | -<br>6.722685<br>131 | 0.00<br>1226 | 0.01<br>5474 | Dow<br>n |
| LOC104975<br>620 | 260.05<br>47021 | 462.998733  | 57.11067119 | 0.1233<br>49519 | -<br>3.019176<br>001 | 0.00<br>6541 | 0.05<br>4124 | Dow<br>n |
| LOC104975<br>635 | 167.24<br>19133 | 225.659653  | 108.8241735 | 0.4822<br>4914  | -<br>1.052149<br>43  | 0.01<br>2565 | 0.08<br>6969 | Dow<br>n |
| LOC104975<br>830 | 548.39<br>49772 | 21.13993784 | 1075.650017 | 50.882<br>36421 | 5.669093<br>801      | 5.82<br>E-05 | 0.00<br>1335 | Up       |
| LOC104975<br>908 | 18.047<br>58573 | 34.98165146 | 1.113520002 | 0.0318<br>31545 | -<br>4.973399<br>021 | 0.00<br>3407 | 0.03<br>336  | Dow<br>n |
| LOC104976        | 42.983          | 12.13743916 | 73.82957864 | 6.0827          | 2.604734             | 6.94         | 0.00         | Up       |

|                  |                 |             |             |                 |                      |              |              |          |
|------------------|-----------------|-------------|-------------|-----------------|----------------------|--------------|--------------|----------|
| 252              | 5089            |             |             | 97013           | 861                  | E-05         | 1545         |          |
| LOC104976<br>349 | 34.132<br>66528 | 54.43312616 | 13.8322044  | 0.2541<br>13724 | -<br>1.976453<br>801 | 0.00<br>3987 | 0.03<br>7315 | Dow<br>n |
| LOC404103        | 312.99<br>13277 | 518.9901753 | 106.9924801 | 0.2061<br>55117 | -<br>2.278197<br>827 | 0.01<br>9887 | 0.12<br>0835 | Dow<br>n |
| LOC444875        | 29.844<br>00793 | 4.328481232 | 55.35953463 | 12.789<br>59794 | 3.676899<br>006      | 0.00<br>15   | 0.01<br>8068 | Up       |
| LOC504219        | 1703.2<br>55849 | 2419.915972 | 986.595726  | 0.4076<br>9834  | -<br>1.294426<br>011 | 0.02<br>2035 | 0.13<br>031  | Dow<br>n |
| LOC504548        | 120.36<br>90666 | 70.05007148 | 170.6880617 | 2.4366<br>57923 | 1.284903<br>729      | 0.00<br>516  | 0.04<br>5562 | Up       |
| LOC504773        | 1231.8<br>21498 | 2308.611832 | 155.0311643 | 0.0671<br>53413 | -<br>3.896395<br>46  | 0.00<br>0517 | 0.00<br>7918 | Dow<br>n |
| LOC506831        | 2387.4<br>03482 | 1047.38665  | 3727.420314 | 3.5587<br>81579 | 1.831383<br>39       | 2.36<br>E-07 | 1.11<br>E-05 | Up       |
| LOC507019        | 29.592<br>86736 | 8.947138824 | 50.23859589 | 5.6150<br>45981 | 2.489297<br>837      | 0.00<br>121  | 0.01<br>53   | Up       |
| LOC507513        | 363.24<br>33272 | 88.56199199 | 637.9246624 | 7.2031<br>42658 | 2.848626<br>477      | 1.91<br>E-12 | 2.61<br>E-10 | Up       |
| LOC507550        | 93.036<br>92086 | 6.942958858 | 179.1308829 | 25.800<br>36646 | 4.689319<br>652      | 0.00<br>0182 | 0.00<br>3415 | Up       |
| LOC508455        | 60.603<br>29656 | 24.7000058  | 96.50658732 | 3.9071<br>48367 | 1.966116<br>04       | 0.00<br>0363 | 0.00<br>5978 | Up       |
| LOC508547        | 1496.6<br>9214  | 2291.279283 | 702.1049976 | 0.3064<br>24888 | -<br>1.706394<br>616 | 0.01<br>4069 | 0.09<br>4842 | Dow<br>n |
| LOC508744        | 162.34<br>16375 | 63.17234835 | 261.5109267 | 4.1396<br>42319 | 2.049506<br>119      | 3.02<br>E-06 | 0.00<br>0106 | Up       |
| LOC508879        | 230.05<br>43652 | 85.74454149 | 374.364189  | 4.3660<br>41062 | 2.126325<br>699      | 0.00<br>2304 | 0.02<br>4867 | Up       |
| LOC509029        | 86.641<br>30281 | 45.5271172  | 127.7554884 | 2.8061<br>40522 | 1.488587<br>256      | 0.00<br>29   | 0.02<br>9682 | Up       |
| LOC509055        | 967.73<br>93014 | 1553.089864 | 382.3887385 | 0.2462<br>11599 | -<br>2.022029<br>368 | 2.37<br>E-08 | 1.42<br>E-06 | Dow<br>n |
| LOC509513        | 99.525<br>32459 | 35.0632209  | 163.9874283 | 4.6769<br>07143 | 2.225554<br>785      | 6.57<br>E-06 | 0.00<br>0208 | Up       |
| LOC509810        | 271.35<br>1315  | 158.560234  | 384.1423961 | 2.4226<br>90649 | 1.276610<br>2        | 0.00<br>1287 | 0.01<br>607  | Up       |
| LOC510193        | 1033.7          | 1482.488521 | 584.9489494 | 0.3945          | -                    | 0.00         | 0.00         | Dow      |

|           |                 |             |             |                 |                      |              |              |      |
|-----------|-----------------|-------------|-------------|-----------------|----------------------|--------------|--------------|------|
|           | 18735           |             |             | 7233            | 1.341638<br>307      | 0156         | 3004         | n    |
| LOC510369 | 155.01<br>64023 | 75.82216881 | 234.2106358 | 3.0889<br>46669 | 1.627114<br>963      | 0.00<br>0662 | 0.00<br>9544 | Up   |
| LOC510536 | 194.17<br>64148 | 269.0222914 | 119.3305382 | 0.4435<br>71191 | -<br>1.172762<br>426 | 0.01<br>9813 | 0.12<br>0583 | Down |
| LOC511180 | 279.78<br>24924 | 173.0534795 | 386.5115053 | 2.2334<br>80116 | 1.159293<br>411      | 0.00<br>3188 | 0.03<br>1851 | Up   |
| LOC511617 | 191.94<br>94655 | 89.512062   | 294.3868689 | 3.2887<br>95525 | 1.717559<br>314      | 3.96<br>E-05 | 0.00<br>0962 | Up   |
| LOC511713 | 257.50<br>96304 | 169.6760219 | 345.3432389 | 2.0353<br>09616 | 1.025248<br>277      | 0.01<br>168  | 0.08<br>2481 | Up   |
| LOC512005 | 34.667<br>62045 | 58.86031839 | 10.47492251 | 0.1779<br>62383 | -<br>2.490355<br>775 | 0.03<br>942  | 0.19<br>395  | Down |
| LOC512548 | 29.450<br>0592  | 1.981044628 | 56.91907376 | 28.731<br>84833 | 4.844578<br>9        | 7.44<br>E-08 | 3.91<br>E-06 | Up   |
| LOC512672 | 637.56<br>93014 | 915.715723  | 359.4228797 | 0.3925<br>04869 | -<br>1.349217<br>545 | 0.00<br>0267 | 0.00<br>4632 | Down |
| LOC512684 | 918.68<br>58291 | 593.5723371 | 1243.799321 | 2.0954<br>46912 | 1.067257<br>972      | 0.00<br>2755 | 0.02<br>8498 | Up   |
| LOC512867 | 86.344<br>76153 | 55.2466849  | 117.4428382 | 2.1257<br>8978  | 1.087998<br>936      | 0.02<br>5174 | 0.14<br>3092 | Up   |
| LOC513329 | 293.28<br>07798 | 51.54032621 | 535.0212334 | 10.380<br>63343 | 3.375822<br>576      | 2.37<br>E-15 | 5.52<br>E-13 | Up   |
| LOC513659 | 329.21<br>29312 | 445.7858358 | 212.6400266 | 0.4770<br>0041  | -<br>1.067937<br>588 | 0.01<br>73   | 0.10<br>959  | Down |
| LOC513911 | 49.129<br>84296 | 25.86360162 | 72.3960843  | 2.7991<br>49375 | 1.484988<br>477      | 0.03<br>8565 | 0.19<br>0932 | Up   |
| LOC514257 | 566.69<br>74164 | 786.2818074 | 347.1130253 | 0.4414<br>61346 | -<br>1.179640<br>971 | 0.00<br>4829 | 0.04<br>3399 | Down |
| LOC515150 | 281.52<br>51974 | 542.3736998 | 20.67669511 | 0.0381<br>22599 | -<br>4.713209<br>708 | 0.00<br>0489 | 0.00<br>7605 | Down |
| LOC515676 | 1460.5<br>60815 | 2905.171816 | 15.94981394 | 0.0054<br>90145 | -<br>7.508940<br>085 | 0.00<br>2892 | 0.02<br>9649 | Down |
| LOC515736 | 447.59<br>8448  | 248.2218368 | 646.9750593 | 2.6064<br>38932 | 1.382080<br>059      | 0.00<br>023  | 0.00<br>4103 | Up   |
| LOC516421 | 97.850          | 15.63327106 | 180.0677361 | 11.518          | 3.525848             | 4.22         | 4.64         | Up   |

|           |                 |             |             |                 |                      |              |              |      |
|-----------|-----------------|-------------|-------------|-----------------|----------------------|--------------|--------------|------|
|           | 50359           |             |             | 23796           | 127                  | E-11         | E-09         |      |
| LOC517828 | 3.4048<br>2755  | 0           | 6.809655099 | Inf             | Inf                  | 0.04<br>98   | 0.22<br>774  | Up   |
| LOC518080 | 60.367<br>23002 | 21.26470372 | 99.46975631 | 4.6776<br>93027 | 2.225797<br>188      | 8.84<br>E-05 | 0.00<br>1888 | Up   |
| LOC520336 | 492.32<br>92014 | 663.1276038 | 321.5307989 | 0.4848<br>70177 | -<br>1.044329<br>573 | 0.00<br>4319 | 0.03<br>9813 | Down |
| LOC520788 | 25.449<br>55439 | 5.740998017 | 45.15811077 | 7.8658<br>99037 | 2.975611<br>669      | 0.00<br>0268 | 0.00<br>4632 | Up   |
| LOC520966 | 32.050<br>23089 | 49.60102224 | 14.49943954 | 0.2923<br>21385 | -<br>1.774372<br>718 | 0.00<br>9661 | 0.07<br>2179 | Down |
| LOC521737 | 9.1585<br>09227 | 2.399391667 | 15.91762679 | 6.6340<br>26034 | 2.729884<br>674      | 0.03<br>9686 | 0.19<br>457  | Up   |
| LOC522437 | 53.061<br>49033 | 2.095625261 | 104.0273554 | 49.640<br>24692 | 5.633438<br>387      | 0.00<br>0535 | 0.00<br>8121 | Up   |
| LOC523126 | 46.466<br>52295 | 24.5849399  | 68.348106   | 2.7800<br>80256 | 1.475126<br>531      | 0.01<br>3774 | 0.09<br>3306 | Up   |
| LOC524576 | 26.246<br>17839 | 4.816263443 | 47.67609334 | 9.8989<br>79552 | 3.307279<br>811      | 0.00<br>163  | 0.01<br>9107 | Up   |
| LOC524810 | 1476.5<br>86026 | 202.7184826 | 2750.45357  | 13.567<br>84805 | 3.762120<br>013      | 0.00<br>3844 | 0.03<br>6355 | Up   |
| LOC525353 | 639.63<br>58616 | 942.8710743 | 336.4006489 | 0.3567<br>83295 | -<br>1.486880<br>025 | 4.41<br>E-05 | 0.00<br>1046 | Down |
| LOC525947 | 570.41<br>34879 | 206.0245965 | 934.8023793 | 4.5373<br>33868 | 2.181844<br>82       | 0.00<br>4812 | 0.04<br>329  | Up   |
| LOC526769 | 36.782<br>29163 | 13.31738987 | 60.24719338 | 4.5239<br>49059 | 2.177582<br>684      | 0.00<br>1356 | 0.01<br>6719 | Up   |
| LOC527057 | 129.58<br>23816 | 74.61488331 | 184.54988   | 2.4733<br>65524 | 1.306475<br>463      | 0.04<br>872  | 0.22<br>4785 | Up   |
| LOC527119 | 243.03<br>01333 | 38.73935442 | 447.3209122 | 11.546<br>9377  | 3.529438<br>389      | 8.55<br>E-16 | 2.25<br>E-13 | Up   |
| LOC527981 | 42.348<br>25898 | 16.12655381 | 68.56996415 | 4.2519<br>91154 | 2.088138<br>595      | 0.00<br>0993 | 0.01<br>3162 | Up   |
| LOC528098 | 1186.5<br>0663  | 2260.398439 | 112.6148206 | 0.0498<br>20783 | -<br>4.327108<br>487 | 0.00<br>0237 | 0.00<br>4196 | Down |
| LOC528479 | 45.816<br>98176 | 7.576391856 | 84.05757165 | 11.094<br>67056 | 3.471794<br>924      | 0.00<br>0223 | 0.00<br>4027 | Up   |
| LOC529196 | 59.064<br>82762 | 23.87124653 | 94.25840871 | 3.9486<br>16952 | 1.981347<br>421      | 0.00<br>0413 | 0.00<br>6608 | Up   |
| LOC530077 | 132.37          | 81.3475373  | 183.4073329 | 2.2546          | 1.172880             | 0.00         | 0.06         | Up   |



|           |                 |             |             |                 |                      |              |              |      |
|-----------|-----------------|-------------|-------------|-----------------|----------------------|--------------|--------------|------|
|           | 74351           |             |             | 14448           | 746                  | 7688         | 1273         |      |
| LOC530173 | 7.2263<br>75169 | 0           | 14.45275034 | Inf             | Inf                  | 0.00<br>134  | 0.01<br>6597 | Up   |
| LOC530929 | 211.99<br>38955 | 127.4882314 | 296.4995595 | 2.3257<br>0141  | 1.217665<br>885      | 0.00<br>3562 | 0.03<br>4491 | Up   |
| LOC531296 | 323.79<br>27634 | 118.7349922 | 528.8505345 | 4.4540<br>41093 | 2.155114<br>868      | 0.00<br>0714 | 0.01<br>0134 | Up   |
| LOC532205 | 11.263<br>27421 | 19.87355711 | 2.65299131  | 0.1334<br>93531 | -<br>2.905158<br>264 | 0.01<br>0947 | 0.07<br>8801 | Down |
| LOC533821 | 1868.5<br>16725 | 985.8198975 | 2751.213553 | 2.7907<br>87202 | 1.480672<br>123      | 2.99<br>E-05 | 0.00<br>0756 | Up   |
| LOC534967 | 197.72<br>55583 | 13.02721351 | 382.423903  | 29.355<br>77149 | 4.875572<br>267      | 1.54<br>E-22 | 1.21<br>E-19 | Up   |
| LOC537017 | 592.55<br>08422 | 840.1196446 | 344.9820399 | 0.4106<br>34416 | -<br>1.284073<br>547 | 0.00<br>0365 | 0.00<br>6009 | Down |
| LOC537580 | 20.036<br>08052 | 6.529141834 | 33.54301921 | 5.1374<br>31544 | 2.361047<br>265      | 0.00<br>6659 | 0.05<br>4824 | Up   |
| LOC537655 | 130.82<br>65094 | 248.083716  | 13.56930272 | 0.0546<br>96467 | -<br>4.192408<br>548 | 0.00<br>8065 | 0.06<br>344  | Down |
| LOC538435 | 12.345<br>65747 | 4.468476789 | 20.22283815 | 4.5256<br>67046 | 2.178130<br>449      | 0.04<br>9235 | 0.22<br>5939 | Up   |
| LOC540014 | 367.08<br>04899 | 242.7957901 | 491.3651898 | 2.0237<br>79694 | 1.017052<br>249      | 0.00<br>7733 | 0.06<br>1528 | Up   |
| LOC540707 | 592.01<br>83696 | 36.9795654  | 1147.057174 | 31.018<br>67643 | 4.955065<br>223      | 0.00<br>1306 | 0.01<br>6262 | Up   |
| LOC614141 | 19.119<br>92606 | 9.016573995 | 29.22327813 | 3.2410<br>62309 | 1.696466<br>756      | 0.04<br>7792 | 0.22<br>1907 | Up   |
| LOC614423 | 134.68<br>81642 | 188.1507698 | 81.22555853 | 0.4317<br>0463  | -<br>1.211883<br>528 | 0.00<br>5961 | 0.05<br>0669 | Down |
| LOC614705 | 563.74<br>97399 | 358.0469893 | 769.4524905 | 2.1490<br>26562 | 1.103683<br>315      | 0.00<br>2477 | 0.02<br>6257 | Up   |
| LOC615277 | 20.250<br>41573 | 3.15646533  | 37.34436614 | 11.831<br>07122 | 3.564508<br>801      | 0.00<br>0186 | 0.00<br>3476 | Up   |
| LOC615697 | 13.557<br>14668 | 0.805623925 | 26.30866943 | 32.656<br>26629 | 5.029287<br>946      | 0.00<br>7235 | 0.05<br>8379 | Up   |
| LOC615867 | 76.019<br>51347 | 147.0889757 | 4.95005128  | 0.0336<br>53449 | -<br>4.893101<br>839 | 0.00<br>1047 | 0.01<br>3745 | Down |
| LOC616111 | 3175.5<br>63905 | 4572.397059 | 1778.730751 | 0.3890<br>14936 | -<br>1.362102        | 0.00<br>7078 | 0.05<br>739  | Down |

|           |                 |             |             |                 |                      |              |              |      |
|-----------|-----------------|-------------|-------------|-----------------|----------------------|--------------|--------------|------|
|           |                 |             |             |                 | 546                  |              |              |      |
| LOC616478 | 86.004<br>69333 | 34.83116925 | 137.1782174 | 3.9383<br>75322 | 1.977600<br>605      | 0.02<br>4947 | 0.14<br>2113 | Up   |
| LOC616957 | 134.15<br>09185 | 267.2001429 | 1.101694084 | 0.0041<br>23104 | -<br>7.922053<br>294 | 0.03<br>111  | 0.16<br>5436 | Down |
| LOC617302 | 38.597<br>3015  | 12.38812528 | 64.80647771 | 5.2313<br>38578 | 2.387180<br>146      | 0.00<br>0417 | 0.00<br>6656 | Up   |
| LOC618367 | 65.376<br>23748 | 34.41054262 | 96.34193233 | 2.7997<br>79515 | 1.485313<br>218      | 0.00<br>6655 | 0.05<br>4824 | Up   |
| LOC618565 | 42.086<br>14192 | 23.22714303 | 60.94514081 | 2.6238<br>759   | 1.391699<br>487      | 0.02<br>9891 | 0.16<br>0885 | Up   |
| LOC768255 | 577.16<br>85729 | 299.9056094 | 854.4315363 | 2.8490<br>01518 | 1.510456<br>39       | 3.70<br>E-05 | 0.00<br>0908 | Up   |
| LOC781261 | 39.121<br>18748 | 7.712982613 | 70.52939235 | 9.1442<br>43659 | 3.192863<br>846      | 4.94<br>E-06 | 0.00<br>0164 | Up   |
| LOC781298 | 165.87<br>54574 | 230.6326055 | 101.1183093 | 0.4384<br>38915 | -<br>1.189552<br>239 | 0.00<br>3935 | 0.03<br>6938 | Down |
| LOC781635 | 7.1677<br>19704 | 0.413817024 | 13.92162238 | 33.641<br>97596 | 5.072190<br>54       | 0.00<br>5652 | 0.04<br>8665 | Up   |
| LOC781710 | 54.952<br>59531 | 30.01311148 | 79.89207915 | 2.6619<br>05921 | 1.412459<br>583      | 0.03<br>3174 | 0.17<br>307  | Up   |
| LOC782258 | 3.0884<br>12582 | 6.176825164 | 0           | 0               | #NAME?               | 0.03<br>8139 | 0.18<br>9288 | Down |
| LOC782922 | 4.6385<br>12263 | 9.007513964 | 0.269510562 | 0.0299<br>20638 | -<br>5.062715<br>267 | 0.02<br>0429 | 0.12<br>3466 | Down |
| LOC783396 | 43.225<br>50703 | 22.69470061 | 63.75631345 | 2.8093<br>0401  | 1.490212<br>755      | 0.01<br>7994 | 0.11<br>3002 | Up   |
| LOC783399 | 439.50<br>72828 | 18.46784992 | 860.5467157 | 46.597<br>01694 | 5.542165<br>694      | 1.04<br>E-19 | 4.98<br>E-17 | Up   |
| LOC783497 | 20.295<br>96541 | 9.385730819 | 31.20619999 | 3.3248<br>55634 | 1.733291<br>7        | 0.04<br>1435 | 0.19<br>9942 | Up   |
| LOC783508 | 12.568<br>21964 | 21.11224333 | 4.024195955 | 0.1906<br>09586 | -<br>2.391307<br>421 | 0.02<br>4703 | 0.14<br>1168 | Down |
| LOC783893 | 11.480<br>24865 | 2.8306888   | 20.12980849 | 7.1112<br>75705 | 2.830108<br>391      | 0.01<br>5976 | 0.10<br>3512 | Up   |
| LOC784007 | 2758.0<br>34125 | 4584.283406 | 931.7848446 | 0.2032<br>56379 | -<br>2.298627<br>465 | 0.01<br>3422 | 0.09<br>1571 | Down |
| LOC784148 | 101.98<br>1208  | 63.48015951 | 140.4822566 | 2.2130<br>10453 | 1.146010<br>266      | 0.01<br>7293 | 0.10<br>959  | Up   |

|           |                 |             |             |                 |                      |              |              |      |
|-----------|-----------------|-------------|-------------|-----------------|----------------------|--------------|--------------|------|
| LOC785756 | 49.581<br>14177 | 3.940079132 | 95.22220441 | 24.167<br>5868  | 4.595001<br>518      | 0.00<br>023  | 0.00<br>4105 | Up   |
| LOC786065 | 34.336<br>33366 | 10.20494479 | 58.46772253 | 5.7293<br>52165 | 2.518372<br>018      | 0.01<br>6021 | 0.10<br>3731 | Up   |
| LOC786165 | 338.85<br>67562 | 224.5196275 | 453.1938848 | 2.0185<br>04529 | 1.013286<br>824      | 0.00<br>6762 | 0.05<br>5448 | Up   |
| LOC786372 | 446.69<br>37277 | 250.8662382 | 642.5212173 | 2.5612<br>10396 | 1.356825<br>771      | 0.00<br>0354 | 0.00<br>586  | Up   |
| LOC786987 | 68.384<br>92331 | 33.62580361 | 103.144043  | 3.0674<br>07525 | 1.617019<br>851      | 0.00<br>2991 | 0.03<br>0453 | Up   |
| LOC787234 | 24.789<br>37853 | 12.49994107 | 37.07881599 | 2.9663<br>19264 | 1.568673<br>883      | 0.03<br>7457 | 0.18<br>7364 | Up   |
| LOC787269 | 337.79<br>0847  | 565.984918  | 109.5967759 | 0.1936<br>39039 | -<br>2.368558<br>252 | 0.01<br>4797 | 0.09<br>8225 | Down |
| LOC787891 | 103.24<br>61035 | 45.15568079 | 161.3365263 | 3.5728<br>95447 | 1.837093<br>697      | 9.98<br>E-05 | 0.00<br>2066 | Up   |
| LOC787904 | 11.931<br>7332  | 23.86346641 | 0           | 0               | #NAME?               | 0.00<br>092  | 0.01<br>2413 | Down |
| LOC788054 | 28.292<br>91415 | 11.48652605 | 45.09930225 | 3.9262<br>78673 | 1.973162<br>574      | 0.00<br>7389 | 0.05<br>9441 | Up   |
| LOC788414 | 183.57<br>6595  | 93.04306712 | 274.1101229 | 2.9460<br>56395 | 1.558785<br>048      | 0.02<br>1498 | 0.12<br>8168 | Up   |
| LOC788634 | 646.03<br>0086  | 415.7581999 | 876.3019721 | 2.1077<br>20238 | 1.075683<br>388      | 0.03<br>4319 | 0.17<br>736  | Up   |
| LOC789148 | 338.18<br>35619 | 451.6254776 | 224.7416462 | 0.4976<br>28361 | -<br>1.006859<br>385 | 0.00<br>8748 | 0.06<br>7212 | Down |
| LOC789374 | 239.25<br>33167 | 145.6136114 | 332.8930219 | 2.2861<br>39453 | 1.192913<br>41       | 0.00<br>2596 | 0.02<br>7239 | Up   |
| LOC789715 | 45.578<br>3275  | 22.09558788 | 69.06106712 | 3.1255<br>59162 | 1.644114<br>311      | 0.00<br>7118 | 0.05<br>7583 | Up   |
| LOC790312 | 44.203<br>6586  | 67.56296989 | 20.8443473  | 0.3085<br>17333 | -<br>1.696576<br>549 | 0.00<br>4675 | 0.04<br>2316 | Down |
| LONP2     | 2512.2<br>49358 | 1548.140141 | 3476.358576 | 2.2455<br>06388 | 1.167040<br>827      | 0.00<br>0797 | 0.01<br>1101 | Up   |
| LOX       | 2429.0<br>96875 | 4712.278446 | 145.9153041 | 0.0309<br>64916 | -<br>5.013221<br>678 | 0.00<br>0575 | 0.00<br>8584 | Down |
| LOXL1     | 3515.8<br>04164 | 5567.720082 | 1463.888247 | 0.2629<br>24182 | -<br>1.927281<br>258 | 0.00<br>5053 | 0.04<br>4991 | Down |
| LOXL2     | 2494.7          | 4302.707552 | 686.8441964 | 0.1596          | -                    | 9.92         | 5.06         | Down |

|        |                 |             |             |                 |                      |              |              |          |
|--------|-----------------|-------------|-------------|-----------------|----------------------|--------------|--------------|----------|
|        | 75874           |             |             | 30695           | 2.647190<br>005      | E-08         | E-06         | n        |
| LOXL4  | 602.06<br>91073 | 1103.332917 | 100.8052974 | 0.0913<br>64352 | -<br>3.452224<br>812 | 1.93<br>E-10 | 1.93<br>E-08 | Dow<br>n |
| LPAR2  | 267.41<br>4945  | 82.61543213 | 452.2144578 | 5.4737<br>28651 | 2.452523<br>918      | 4.05<br>E-09 | 3.06<br>E-07 | Up       |
| LPAR3  | 284.53<br>63347 | 43.42988146 | 525.642788  | 12.103<br>25173 | 3.597322<br>797      | 1.24<br>E-16 | 3.51<br>E-14 | Up       |
| LPCAT2 | 164.18<br>24822 | 234.6011075 | 93.76385695 | 0.3996<br>73548 | -<br>1.323106<br>003 | 0.00<br>222  | 0.02<br>4194 | Dow<br>n |
| LPCAT3 | 862.25<br>31165 | 1262.739119 | 461.7671138 | 0.3656<br>86868 | -<br>1.451319<br>275 | 0.04<br>0888 | 0.19<br>8323 | Dow<br>n |
| LPGAT1 | 263.28<br>17901 | 370.6200717 | 155.9435084 | 0.4207<br>63796 | -<br>1.248917<br>518 | 0.00<br>1792 | 0.02<br>0558 | Dow<br>n |
| LPHN3  | 770.43<br>31133 | 1200.759801 | 340.1064253 | 0.2832<br>42681 | -<br>1.819889<br>418 | 0.03<br>2198 | 0.16<br>9402 | Dow<br>n |
| LPL    | 3404.5<br>66573 | 6155.983161 | 653.1499859 | 0.1061<br>00028 | -<br>3.236503<br>057 | 0.00<br>3342 | 0.03<br>2898 | Dow<br>n |
| LPP    | 701.78<br>66316 | 1169.754603 | 233.8186597 | 0.1998<br>86933 | -<br>2.322743<br>934 | 0.00<br>9467 | 0.07<br>1079 | Dow<br>n |
| LPXN   | 129.78<br>08307 | 71.64770013 | 187.9139613 | 2.6227<br>49383 | 1.391079<br>957      | 0.00<br>1597 | 0.01<br>8877 | Up       |
| LRAT   | 137.74<br>72703 | 199.6308036 | 75.86373693 | 0.3800<br>20195 | -<br>1.395852<br>006 | 0.02<br>8117 | 0.15<br>4034 | Dow<br>n |
| LRG1   | 18.568<br>6397  | 4.44193665  | 32.69534275 | 7.3606<br>05369 | 2.879824<br>425      | 0.00<br>2262 | 0.02<br>4557 | Up       |
| LRP1   | 24112.<br>33109 | 33691.82823 | 14532.83396 | 0.4313<br>45959 | -<br>1.213082<br>654 | 0.00<br>2826 | 0.02<br>9118 | Dow<br>n |
| LRP1B  | 12.650<br>68448 | 25.30136896 | 0           | 0               | #NAME?               | 0.02<br>0357 | 0.12<br>3068 | Dow<br>n |
| LRP3   | 202.00<br>87003 | 302.8906112 | 101.1267893 | 0.3338<br>72314 | -<br>1.582631<br>63  | 0.04<br>8626 | 0.22<br>4574 | Dow<br>n |
| LRRC2  | 254.00<br>09535 | 53.0007533  | 455.0011538 | 8.5848<br>05412 | 3.101785<br>434      | 4.78<br>E-13 | 7.49<br>E-11 | Up       |

|         |                 |             |             |                 |                      |              |              |      |
|---------|-----------------|-------------|-------------|-----------------|----------------------|--------------|--------------|------|
| LRRC23  | 29.056<br>78415 | 6.863338441 | 51.25022985 | 7.4672<br>45029 | 2.900576<br>072      | 0.00<br>0173 | 0.00<br>328  | Up   |
| LRRC27  | 221.82<br>13197 | 109.7963911 | 333.8462483 | 3.0405<br>94004 | 1.604353<br>193      | 9.26<br>E-05 | 0.00<br>196  | Up   |
| LRRC32  | 629.10<br>89268 | 952.4940221 | 305.7238316 | 0.3209<br>71916 | -<br>1.639481<br>022 | 0.00<br>058  | 0.00<br>8646 | Down |
| LRRC4C  | 119.78<br>61109 | 27.24392304 | 212.3282989 | 7.7936<br>02213 | 2.962290<br>298      | 1.18<br>E-09 | 1.04<br>E-07 | Up   |
| LRRC55  | 48.281<br>1713  | 79.36718296 | 17.19515963 | 0.2166<br>53269 | -<br>2.206540<br>091 | 0.00<br>0218 | 0.00<br>3945 | Down |
| LRRC56  | 34.595<br>28935 | 10.95359838 | 58.23698033 | 5.3166<br>98525 | 2.410530<br>663      | 0.00<br>0563 | 0.00<br>8427 | Up   |
| LRRC58  | 137.16<br>51564 | 201.260678  | 73.06963492 | 0.3630<br>59668 | -<br>1.461721<br>424 | 0.00<br>098  | 0.01<br>3047 | Down |
| LRRC59  | 1348.9<br>9936  | 1853.870129 | 844.1285919 | 0.4553<br>33186 | -<br>1.135005<br>484 | 0.00<br>1014 | 0.01<br>3366 | Down |
| LRRC6   | 73.418<br>49266 | 16.28418417 | 130.5528012 | 8.0171<br>53319 | 3.003090<br>064      | 1.06<br>E-07 | 5.36<br>E-06 | Up   |
| LRRC8B  | 663.06<br>9167  | 417.2346434 | 908.9036906 | 2.1783<br>99385 | 1.123268<br>48       | 0.00<br>239  | 0.02<br>5619 | Up   |
| LRRC8C  | 792.65<br>33649 | 1300.875988 | 284.4307415 | 0.2186<br>45547 | -<br>2.193334<br>131 | 0.01<br>2458 | 0.08<br>6359 | Down |
| LRRC8E  | 316.64<br>54472 | 131.3464105 | 501.9444839 | 3.8215<br>31794 | 1.934151<br>033      | 1.13<br>E-06 | 4.47<br>E-05 | Up   |
| LRRIQ1  | 21.716<br>7554  | 4.424456542 | 39.00905425 | 8.8166<br>88306 | 3.140236<br>857      | 0.00<br>0419 | 0.00<br>6689 | Up   |
| LRRN3   | 80.894<br>95906 | 36.65442882 | 125.1354893 | 3.4139<br>25501 | 1.771431<br>576      | 0.00<br>059  | 0.00<br>875  | Up   |
| LRRN4CL | 2066.0<br>38772 | 3312.191116 | 819.8864276 | 0.2475<br>35966 | -<br>2.014289<br>936 | 1.48<br>E-05 | 0.00<br>0411 | Down |
| LSR     | 709.49<br>6745  | 264.0996906 | 1154.893799 | 4.3729<br>4643  | 2.128605<br>675      | 1.56<br>E-08 | 9.92<br>E-07 | Up   |
| LTA4H   | 1554.1<br>4903  | 817.5900202 | 2290.70804  | 2.8017<br>80824 | 1.486344<br>102      | 0.01<br>3508 | 0.09<br>199  | Up   |
| LTB     | 412.63<br>86234 | 271.3673521 | 553.9098947 | 2.0411<br>81043 | 1.029404<br>148      | 0.00<br>5017 | 0.04<br>4736 | Up   |
| LTBP1   | 8726.9<br>97141 | 14620.95345 | 2833.04083  | 0.1937<br>65806 | -<br>2.367614        | 0.00<br>3895 | 0.03<br>6674 | Down |

|         |                 |             |             |                 |                      |              |              |          |
|---------|-----------------|-------------|-------------|-----------------|----------------------|--------------|--------------|----------|
|         |                 |             |             |                 | 095                  |              |              |          |
| LTBP2   | 4132.1<br>4065  | 6839.15095  | 1425.130351 | 0.2083<br>78256 | -<br>2.262723<br>35  | 0.00<br>304  | 0.03<br>0803 | Dow<br>n |
| LTC4S   | 99.613<br>28974 | 143.9473131 | 55.27926643 | 0.3840<br>24302 | -<br>1.380730<br>483 | 0.00<br>3003 | 0.03<br>0563 | Dow<br>n |
| LTF     | 107526<br>.0071 | 4889.529305 | 210162.485  | 42.982<br>15061 | 5.425665<br>765      | 1.31<br>E-19 | 6.10<br>E-17 | Up       |
| LUM     | 20689.<br>44353 | 35391.5352  | 5987.351871 | 0.1691<br>74686 | -<br>2.563414<br>38  | 0.00<br>0371 | 0.00<br>6081 | Dow<br>n |
| LUZP2   | 296.26<br>21541 | 33.39600238 | 559.1283059 | 16.742<br>37232 | 4.065432<br>061      | 3.87<br>E-11 | 4.33<br>E-09 | Up       |
| LY6E    | 1134.3<br>20003 | 369.6964614 | 1898.943545 | 5.1364<br>93699 | 2.360783<br>875      | 1.42<br>E-10 | 1.46<br>E-08 | Up       |
| LY75    | 226.16<br>30834 | 131.0084494 | 321.3177173 | 2.4526<br>48808 | 1.294340<br>671      | 0.03<br>0926 | 0.16<br>4603 | Up       |
| LY9     | 171.60<br>34777 | 108.4401252 | 234.7668303 | 2.1649<br>44295 | 1.114329<br>904      | 0.00<br>6724 | 0.05<br>5165 | Up       |
| LYG2    | 10.204<br>67993 | 3.24903584  | 17.16032402 | 5.2816<br>66582 | 2.400993<br>231      | 0.04<br>6201 | 0.21<br>6292 | Up       |
| LYPD2   | 9.5770<br>97067 | 1.959034504 | 17.19515963 | 8.7773<br>64357 | 3.133787<br>796      | 0.01<br>9105 | 0.11<br>7832 | Up       |
| LYPD3   | 497.36<br>48716 | 122.1192223 | 872.6105208 | 7.1455<br>62381 | 2.837047<br>561      | 2.68<br>E-13 | 4.46<br>E-11 | Up       |
| LYPD5   | 48.786<br>78076 | 28.38666311 | 69.18689841 | 2.4373<br>02974 | 1.285285<br>599      | 0.03<br>5161 | 0.18<br>0526 | Up       |
| LYPD6B  | 37.098<br>7465  | 5.225550452 | 68.97194254 | 13.198<br>98127 | 3.722354<br>678      | 5.90<br>E-07 | 2.53<br>E-05 | Up       |
| LYSMD3  | 608.43<br>62573 | 860.3159166 | 356.5565979 | 0.4144<br>4845  | -<br>1.270735<br>428 | 0.00<br>0612 | 0.00<br>8963 | Dow<br>n |
| LYVE1   | 572.38<br>76128 | 1057.234298 | 87.54092761 | 0.0828<br>01823 | -<br>3.594193<br>652 | 2.87<br>E-06 | 0.00<br>0101 | Dow<br>n |
| M1AP    | 70.274<br>53135 | 31.06765637 | 109.4814063 | 3.5239<br>67339 | 1.817200<br>553      | 0.00<br>1507 | 0.01<br>8109 | Up       |
| MAATS1  | 46.343<br>65393 | 27.30542339 | 65.38188446 | 2.3944<br>65141 | 1.259703<br>433      | 0.03<br>5368 | 0.18<br>1044 | Up       |
| MAB21L2 | 448.57<br>81493 | 71.88549448 | 825.2708042 | 11.480<br>35233 | 3.521095<br>014      | 2.70<br>E-15 | 6.20<br>E-13 | Up       |
| MAB21L3 | 10.504<br>77418 | 2.545042455 | 18.4645059  | 7.2550<br>87579 | 2.858993<br>03       | 0.01<br>7692 | 0.11<br>1685 | Up       |

|        |                 |             |             |                 |                      |              |              |      |
|--------|-----------------|-------------|-------------|-----------------|----------------------|--------------|--------------|------|
| MACC1  | 142.34<br>83909 | 80.1275147  | 204.5692671 | 2.5530<br>46452 | 1.352219<br>787      | 0.02<br>3705 | 0.13<br>7275 | Up   |
| MAEL   | 18.806<br>08043 | 5.838098542 | 31.77406232 | 5.4425<br>36144 | 2.444279<br>083      | 0.00<br>637  | 0.05<br>3125 | Up   |
| MAF    | 248.04<br>11145 | 351.4693432 | 144.6128858 | 0.4114<br>52346 | -<br>1.281202<br>746 | 0.00<br>2527 | 0.02<br>6639 | Down |
| MAGED1 | 4679.4<br>0825  | 6335.526082 | 3023.290418 | 0.4771<br>96428 | -<br>1.067344<br>85  | 0.00<br>1916 | 0.02<br>1594 | Down |
| MAGEE2 | 80.374<br>66501 | 123.1436676 | 37.60566246 | 0.3053<br>804   | -<br>1.711320<br>625 | 0.00<br>1484 | 0.01<br>7903 | Down |
| MAGEL2 | 140.05<br>98005 | 201.9469782 | 78.17262282 | 0.3870<br>94788 | -<br>1.369241<br>21  | 0.01<br>0714 | 0.07<br>7745 | Down |
| MAK    | 36.987<br>68669 | 3.667382879 | 70.30799051 | 19.171<br>16178 | 4.260865<br>863      | 3.95<br>E-08 | 2.19<br>E-06 | Up   |
| MAL2   | 1476.9<br>10192 | 489.5003912 | 2464.319993 | 5.0343<br>57555 | 2.331807<br>685      | 2.27<br>E-10 | 2.25<br>E-08 | Up   |
| MAMDC2 | 396.04<br>85304 | 606.5075336 | 185.5895271 | 0.3059<br>97068 | -<br>1.708410<br>264 | 0.00<br>5221 | 0.04<br>5923 | Down |
| MAML3  | 504.73<br>54189 | 318.2303806 | 691.2404572 | 2.1721<br>38486 | 1.119116<br>086      | 0.00<br>3212 | 0.03<br>2043 | Up   |
| MAMSTR | 102.62<br>11173 | 150.7142413 | 54.52799325 | 0.3617<br>97218 | -<br>1.466746<br>779 | 0.00<br>7817 | 0.06<br>1889 | Down |
| MAN1A1 | 2234.5<br>11608 | 3464.38128  | 1004.641936 | 0.2899<br>91734 | -<br>1.785916<br>315 | 0.00<br>6612 | 0.05<br>4563 | Down |
| MAN1A2 | 412.81<br>27964 | 554.3292434 | 271.2963493 | 0.4894<br>13742 | -<br>1.030873<br>484 | 0.00<br>6183 | 0.05<br>1968 | Down |
| MAN1C1 | 1061.9<br>79644 | 1490.544071 | 633.4152164 | 0.4249<br>55712 | -<br>1.234615<br>602 | 0.00<br>1473 | 0.01<br>785  | Down |
| MAN2A1 | 1541.0<br>50271 | 2108.434689 | 973.665854  | 0.4617<br>95596 | -<br>1.114673<br>68  | 0.00<br>1439 | 0.01<br>7522 | Down |
| MANF   | 1143.5<br>80941 | 1532.522247 | 754.6396349 | 0.4924<br>16757 | -<br>1.022048<br>237 | 0.00<br>3318 | 0.03<br>2738 | Down |
| MAOA   | 1359.6          | 2313.964026 | 405.298634  | 0.1751          | -                    | 1.91         | 1.57         | Down |

|              |                 |             |             |                 |                      |              |              |          |
|--------------|-----------------|-------------|-------------|-----------------|----------------------|--------------|--------------|----------|
|              | 3133            |             |             | 53386           | 2.513309<br>217      | E-09         | E-07         | n        |
| MAOB         | 1944.8<br>5505  | 3559.39288  | 330.3172202 | 0.0928<br>01562 | -<br>3.429707<br>096 | 0.02<br>9653 | 0.16<br>0081 | Dow<br>n |
| MAP1A        | 4001.1<br>07259 | 6901.324517 | 1100.890001 | 0.1595<br>18654 | -<br>2.648202<br>949 | 0.00<br>5693 | 0.04<br>8913 | Dow<br>n |
| MAP1B        | 6496.6<br>51096 | 11919.95309 | 1073.349102 | 0.0900<br>4642  | -<br>3.473187<br>27  | 0.00<br>6401 | 0.05<br>3279 | Dow<br>n |
| MAP2         | 1134.9<br>69645 | 633.9968586 | 1635.942432 | 2.5803<br>63625 | 1.367574<br>385      | 0.00<br>0194 | 0.00<br>3599 | Up       |
| MAP3K1       | 1707.9<br>26593 | 1122.932083 | 2292.921104 | 2.0419<br>05418 | 1.029916<br>042      | 0.00<br>3257 | 0.03<br>241  | Up       |
| MAP3K7CL     | 103.55<br>17247 | 149.1973291 | 57.90612034 | 0.3881<br>17674 | -<br>1.365433<br>963 | 0.00<br>3275 | 0.03<br>249  | Dow<br>n |
| MAP3K9       | 118.67<br>79936 | 59.10328271 | 178.2527045 | 3.0159<br>5269  | 1.592613<br>798      | 0.00<br>0718 | 0.01<br>0166 | Up       |
| MAP4K1       | 236.82<br>42971 | 142.7202175 | 330.9283767 | 2.3187<br>21079 | 1.213329<br>287      | 0.00<br>2067 | 0.02<br>288  | Up       |
| MAP7D3       | 1187.3<br>06012 | 1793.401945 | 581.2100796 | 0.3240<br>82441 | -<br>1.625567<br>239 | 5.44<br>E-06 | 0.00<br>018  | Dow<br>n |
| MAP9         | 71.040<br>52743 | 45.76938325 | 96.31167161 | 2.1042<br>81613 | 1.073327<br>791      | 0.03<br>9763 | 0.19<br>4896 | Up       |
| MAPK13       | 670.34<br>56485 | 380.3539136 | 960.3373835 | 2.5248<br>52116 | 1.336198<br>89       | 0.03<br>7204 | 0.18<br>6675 | Up       |
| MAPK15       | 533.86<br>51125 | 216.2120241 | 851.5182009 | 3.9383<br>48039 | 1.977590<br>61       | 1.99<br>E-07 | 9.52<br>E-06 | Up       |
| MAPK8IP2     | 52.925<br>37364 | 15.23240413 | 90.61834315 | 5.9490<br>50615 | 2.572659<br>453      | 2.33<br>E-05 | 0.00<br>0617 | Up       |
| MAPT         | 333.78<br>02235 | 139.6553565 | 527.9050906 | 3.7800<br>56161 | 1.918407<br>669      | 0.00<br>1819 | 0.02<br>0796 | Up       |
| 3-Mar        | 204.23<br>43204 | 314.9946555 | 93.47398516 | 0.2967<br>47845 | -<br>1.752690<br>543 | 2.59<br>E-05 | 0.00<br>0671 | Dow<br>n |
| MARCKSL<br>1 | 1668.2<br>29301 | 815.7115628 | 2520.747038 | 3.0902<br>43112 | 1.627720<br>341      | 3.57<br>E-06 | 0.00<br>0123 | Up       |
| MARVELD<br>1 | 4836.3<br>22225 | 7374.71442  | 2297.930029 | 0.3115<br>95799 | -<br>1.682252<br>314 | 0.01<br>0784 | 0.07<br>8094 | Dow<br>n |
| MARVELD      | 180.44          | 41.71636312 | 319.1739949 | 7.6510          | 2.935657             | 8.70         | 9.18         | Up       |



|        |                 |             |             |                 |                      |              |              |      |
|--------|-----------------|-------------|-------------|-----------------|----------------------|--------------|--------------|------|
| 3      | 5179            |             |             | 50356           | 818                  | E-11         | E-09         |      |
| MATK   | 506.80<br>9875  | 198.1620068 | 815.4577432 | 4.1151<br>06405 | 2.040929<br>735      | 8.22<br>E-08 | 4.28<br>E-06 | Up   |
| MBNL1  | 5258.5<br>5678  | 7274.79637  | 3242.317189 | 0.4456<br>91814 | -<br>1.165881<br>632 | 0.00<br>9616 | 0.07<br>1961 | Down |
| MBNL2  | 2130.2<br>63647 | 2887.510865 | 1373.016429 | 0.4755<br>01736 | -<br>1.072477<br>486 | 0.00<br>2234 | 0.02<br>4316 | Down |
| MBP    | 207.82<br>39805 | 136.120875  | 279.527086  | 2.0535<br>21078 | 1.038099<br>756      | 0.01<br>0018 | 0.07<br>3874 | Up   |
| MCAM   | 9459.9<br>21942 | 14481.01953 | 4438.824355 | 0.3065<br>27061 | -<br>1.705913<br>651 | 7.36<br>E-05 | 0.00<br>1622 | Down |
| MCF2   | 186.22<br>47783 | 44.88301369 | 327.5665429 | 7.2982<br>29684 | 2.867546<br>555      | 4.67<br>E-06 | 0.00<br>0155 | Up   |
| MCOLN3 | 91.554<br>37935 | 57.65677623 | 125.4519825 | 2.1758<br>41083 | 1.121573<br>191      | 0.02<br>2872 | 0.13<br>3822 | Up   |
| MCTP1  | 403.63<br>05124 | 543.8356787 | 263.4253462 | 0.4843<br>84082 | -<br>1.045776<br>638 | 0.04<br>3097 | 0.20<br>5956 | Down |
| MDK    | 465.10<br>84221 | 199.6194852 | 730.5973591 | 3.6599<br>50122 | 1.871823<br>988      | 6.97<br>E-07 | 2.89<br>E-05 | Up   |
| ME1    | 440.83<br>35137 | 639.6764996 | 241.9905278 | 0.3783<br>0142  | -<br>1.402391<br>905 | 0.00<br>1713 | 0.01<br>9874 | Down |
| ME3    | 316.94<br>00319 | 469.7844292 | 164.0956345 | 0.3492<br>99858 | -<br>1.517462<br>038 | 0.01<br>2031 | 0.08<br>4398 | Down |
| MEDAG  | 2334.3<br>91844 | 4369.685588 | 299.0981006 | 0.0684<br>48426 | -<br>3.868838<br>823 | 1.26<br>E-07 | 6.26<br>E-06 | Down |
| MEF2C  | 340.88<br>62664 | 461.0062011 | 220.7663316 | 0.4788<br>7931  | -<br>1.062265<br>989 | 0.00<br>5099 | 0.04<br>527  | Down |
| MEF2D  | 833.18<br>32365 | 1174.176993 | 492.1894801 | 0.4191<br>7827  | -<br>1.254364<br>166 | 0.00<br>0547 | 0.00<br>8247 | Down |
| MEGF10 | 262.84<br>82623 | 104.6920841 | 421.0044405 | 4.0213<br>58865 | 2.007683<br>087      | 1.70<br>E-05 | 0.00<br>0465 | Up   |
| MEGF6  | 991.08<br>20109 | 1485.208547 | 496.9554753 | 0.3346<br>03162 | -<br>1.579477<br>018 | 0.02<br>256  | 0.13<br>2547 | Down |
| MEOX2  | 1122.0          | 1754.59494  | 489.5497311 | 0.2790          | -                    | 2.05         | 9.75         | Down |

|           |                 |             |             |                 |                      |              |              |          |
|-----------|-----------------|-------------|-------------|-----------------|----------------------|--------------|--------------|----------|
|           | 72336           |             |             | 10112           | 1.841610<br>684      | E-07         | E-06         | n        |
| MESDC1    | 314.66<br>99644 | 429.2218275 | 200.1181013 | 0.4662<br>3468  | -<br>1.100871<br>775 | 0.00<br>4055 | 0.03<br>779  | Dow<br>n |
| MET       | 1065.2<br>78852 | 534.7148296 | 1595.842874 | 2.9844<br>74687 | 1.577477<br>018      | 1.07<br>E-05 | 0.00<br>0316 | Up       |
| METTL24   | 235.58<br>51723 | 316.1357268 | 155.0346178 | 0.4904<br>05242 | -<br>1.027953<br>693 | 0.03<br>5217 | 0.18<br>0717 | Dow<br>n |
| MFAP2     | 2121.8<br>99059 | 3442.332904 | 801.4652144 | 0.2328<br>26178 | -<br>2.102674<br>815 | 0.02<br>8215 | 0.15<br>4289 | Dow<br>n |
| MFAP5     | 6949.8<br>31106 | 12140.82827 | 1758.833945 | 0.1448<br>69354 | -<br>2.787175<br>662 | 0.00<br>0592 | 0.00<br>877  | Dow<br>n |
| MFHAS1    | 717.20<br>27573 | 1031.897346 | 402.5081682 | 0.3900<br>66095 | -<br>1.358209<br>492 | 0.03<br>4795 | 0.17<br>9255 | Dow<br>n |
| MFSD6     | 1535.1<br>69553 | 871.0657385 | 2199.273367 | 2.5248<br>07566 | 1.336173<br>434      | 0.00<br>0131 | 0.00<br>2577 | Up       |
| MFSD6L    | 90.320<br>67374 | 53.49206585 | 127.1492816 | 2.3769<br>74597 | 1.249126<br>485      | 0.01<br>1194 | 0.07<br>9982 | Up       |
| MGAT4A    | 158.59<br>63681 | 241.3204639 | 75.87227224 | 0.3144<br>04634 | -<br>1.669305<br>611 | 9.94<br>E-05 | 0.00<br>2064 | Dow<br>n |
| MGAT5B    | 69.780<br>63554 | 33.70815971 | 105.8531114 | 3.1402<br>8153  | 1.650893<br>904      | 0.00<br>1741 | 0.02<br>0135 | Up       |
| MGC126945 | 492.68<br>21247 | 176.0914953 | 809.2727541 | 4.5957<br>51504 | 2.200300<br>792      | 0.00<br>023  | 0.00<br>4106 | Up       |
| MGC138914 | 8.4611<br>71751 | 0.413817024 | 16.50852648 | 39.893<br>29947 | 5.318074<br>545      | 0.00<br>1994 | 0.02<br>2226 | Up       |
| MGC139164 | 896.22<br>46108 | 1278.087453 | 514.3617687 | 0.4024<br>46458 | -<br>1.313131<br>236 | 0.00<br>0217 | 0.00<br>3938 | Dow<br>n |
| MGC151921 | 5947.6<br>88206 | 383.3630689 | 11512.01334 | 30.029<br>00978 | 4.908284<br>997      | 3.14<br>E-27 | 5.19<br>E-24 | Up       |
| MGLL      | 2288.4<br>46811 | 3268.404997 | 1308.488624 | 0.4003<br>44702 | -<br>1.320685<br>381 | 0.00<br>2289 | 0.02<br>4756 | Dow<br>n |
| MGST1     | 3866.8<br>03357 | 2565.922108 | 5167.684606 | 2.0139<br>6784  | 1.010040<br>646      | 0.00<br>3315 | 0.03<br>2737 | Up       |
| MIA       | 1138.7<br>63139 | 266.4452365 | 2011.081041 | 7.5478<br>21335 | 2.916060<br>273      | 1.17<br>E-14 | 2.47<br>E-12 | Up       |

|         |                 |             |             |                 |                      |              |              |          |
|---------|-----------------|-------------|-------------|-----------------|----------------------|--------------|--------------|----------|
| MIC1    | 291.66<br>72398 | 411.1424045 | 172.1920751 | 0.4188<br>13708 | -<br>1.255619<br>431 | 0.01<br>1627 | 0.08<br>2228 | Dow<br>n |
| MICAL2  | 1244.2<br>20895 | 2008.388625 | 480.0531648 | 0.2390<br>24041 | -<br>2.064772<br>364 | 0.00<br>326  | 0.03<br>2411 | Dow<br>n |
| MICALL2 | 2682.0<br>47091 | 1310.81989  | 4053.274293 | 3.0921<br>67219 | 1.628618<br>34       | 0.00<br>066  | 0.00<br>9532 | Up       |
| MID1IP1 | 511.57<br>80955 | 684.2432652 | 338.9129258 | 0.4953<br>10576 | -<br>1.013594<br>669 | 0.00<br>6658 | 0.05<br>4824 | Dow<br>n |
| MILR1   | 150.65<br>75678 | 93.56669261 | 207.7484429 | 2.2203<br>24745 | 1.150770<br>701      | 0.02<br>0496 | 0.12<br>3749 | Up       |
| MISP    | 71.403<br>49028 | 26.45416874 | 116.3528118 | 4.3982<br>78886 | 2.136939<br>085      | 9.72<br>E-05 | 0.00<br>2033 | Up       |
| MITF    | 716.10<br>03072 | 1090.456737 | 341.7438776 | 0.3133<br>95173 | -<br>1.673945<br>136 | 0.00<br>5378 | 0.04<br>701  | Dow<br>n |
| MKX     | 328.00<br>30623 | 630.7471079 | 25.25901681 | 0.0400<br>46187 | -<br>4.642191<br>297 | 8.12<br>E-23 | 7.02<br>E-20 | Dow<br>n |
| MLKL    | 139.76<br>58915 | 196.9142022 | 82.61758071 | 0.4195<br>6131  | -<br>1.253046<br>448 | 0.00<br>373  | 0.03<br>5644 | Dow<br>n |
| MLLT11  | 298.34<br>6022  | 450.7310185 | 145.9610254 | 0.3238<br>31774 | -<br>1.626683<br>546 | 3.19<br>E-05 | 0.00<br>0801 | Dow<br>n |
| MLPH    | 611.26<br>79767 | 103.239613  | 1119.29634  | 10.841<br>7332  | 3.438523<br>505      | 5.90<br>E-18 | 2.06<br>E-15 | Up       |
| MME     | 2282.0<br>12901 | 840.6210914 | 3723.404711 | 4.4293<br>49619 | 2.147094<br>877      | 1.12<br>E-09 | 9.97<br>E-08 | Up       |
| MMP12   | 136.48<br>70389 | 3.724353219 | 269.2497246 | 72.294<br>3579  | 6.175811<br>153      | 4.13<br>E-07 | 1.84<br>E-05 | Up       |
| MMP13   | 14.789<br>99342 | 0           | 29.57998684 | Inf             | Inf                  | 1.89<br>E-06 | 7.05<br>E-05 | Up       |
| MMP16   | 292.29<br>06118 | 512.1947684 | 72.38645527 | 0.1413<br>26034 | -<br>2.822900<br>842 | 0.00<br>3578 | 0.03<br>4589 | Dow<br>n |
| MMP17   | 11.879<br>76213 | 21.03651298 | 2.723011275 | 0.1294<br>42141 | -<br>2.949620<br>721 | 0.00<br>8224 | 0.06<br>4384 | Dow<br>n |
| MMP19   | 598.41<br>75459 | 816.4871633 | 380.3479285 | 0.4658<br>34548 | -<br>1.102110<br>456 | 0.02<br>4303 | 0.13<br>967  | Dow<br>n |

|        |             |             |             |             |              |          |          |      |
|--------|-------------|-------------|-------------|-------------|--------------|----------|----------|------|
| MMP2   | 25129.22795 | 40761.43367 | 9497.022237 | 0.232990388 | -2.101657658 | 0.004763 | 0.042913 | Down |
| MMP23B | 991.1774051 | 1616.289176 | 366.0656339 | 0.226485235 | -2.142511094 | 0.003034 | 0.030788 | Down |
| MMP28  | 590.8321012 | 908.6927847 | 272.9714178 | 0.300400116 | -1.735042726 | 0.015573 | 0.101556 | Down |
| MMP7   | 82.88049012 | 5.877103512 | 159.8838767 | 27.20453645 | 4.765775341  | 1.81E-14 | 3.49E-12 | Up   |
| MMP9   | 214.4983169 | 5.671562845 | 423.3250709 | 74.63993302 | 6.221875786  | 7.45E-09 | 5.24E-07 | Up   |
| MMRN1  | 900.991298  | 1606.616042 | 195.3665544 | 0.121601272 | -3.039769774 | 9.68E-11 | 1.02E-08 | Down |
| MN1    | 630.2666978 | 1118.342092 | 142.1913034 | 0.12714473  | -2.97545643  | 0.005676 | 0.048811 | Down |
| MOB3B  | 523.8156915 | 287.1068791 | 760.5245039 | 2.648924701 | 1.405406834  | 0.000194 | 0.003599 | Up   |
| MOG    | 18.28730395 | 6.520081803 | 30.05452611 | 4.60953206  | 2.204620302  | 0.014183 | 0.095404 | Up   |
| MOK    | 122.1440827 | 73.54170394 | 170.7464614 | 2.321763738 | 1.215221171  | 0.0074   | 0.059498 | Up   |
| MORC4  | 408.0116161 | 561.120198  | 254.9030342 | 0.454275278 | -1.138361298 | 0.002357 | 0.025333 | Down |
| MOXD1  | 99.55909987 | 48.16324523 | 150.9549545 | 3.134235532 | 1.6481136    | 0.00053  | 0.008069 | Up   |
| MPEG1  | 1551.304724 | 867.9377421 | 2234.671706 | 2.574691245 | 1.364399436  | 0.000503 | 0.007742 | Up   |
| MPP2   | 131.9259087 | 68.0689977  | 195.7828198 | 2.876240673 | 1.5241844    | 0.000588 | 0.00873  | Up   |
| MPP6   | 76.60191831 | 123.9072202 | 29.29661637 | 0.236439945 | -2.080454303 | 6.66E-05 | 0.001497 | Down |
| MPPED2 | 129.9174251 | 42.45416235 | 217.3806878 | 5.120362191 | 2.356245864  | 3.59E-07 | 1.62E-05 | Up   |
| MPZL2  | 163.2064177 | 28.50060379 | 297.9122316 | 10.45283931 | 3.38582297   | 6.86E-13 | 1.06E-10 | Up   |
| MRAP2  | 35.51909927 | 65.12649312 | 5.911705433 | 0.090772666 | -3.461598253 | 1.19E-06 | 4.71E-05 | Down |

|          |                 |             |             |                 |                      |              |              |          |
|----------|-----------------|-------------|-------------|-----------------|----------------------|--------------|--------------|----------|
| MRAS     | 957.76<br>31893 | 1395.448304 | 520.0780745 | 0.3726<br>96053 | -<br>1.423928<br>556 | 0.03<br>0325 | 0.16<br>2598 | Dow<br>n |
| MRC2     | 9383.9<br>78315 | 15283.55951 | 3484.397122 | 0.2279<br>83352 | -<br>2.132999<br>618 | 0.01<br>2158 | 0.08<br>5004 | Dow<br>n |
| MREG     | 50.685<br>13243 | 24.71247063 | 76.65779423 | 3.1019<br>88279 | 1.633193<br>235      | 0.00<br>5226 | 0.04<br>5946 | Up       |
| MRGPRF   | 1230.8<br>69825 | 1946.096661 | 515.64299   | 0.2649<br>62682 | -<br>1.916138<br>915 | 0.03<br>5855 | 0.18<br>2337 | Dow<br>n |
| MRO      | 42.486<br>06066 | 64.91690769 | 20.05521363 | 0.3089<br>36675 | -<br>1.694616<br>945 | 0.00<br>6564 | 0.05<br>4245 | Dow<br>n |
| MS4A2    | 11.777<br>23973 | 21.69487564 | 1.859603819 | 0.0857<br>1627  | -<br>3.544287<br>117 | 0.01<br>9492 | 0.11<br>9234 | Dow<br>n |
| MS4A7    | 120.94<br>06788 | 65.53173537 | 176.3496222 | 2.6910<br>56802 | 1.428172<br>843      | 0.00<br>7059 | 0.05<br>7261 | Up       |
| MS4A8    | 272.20<br>76046 | 140.942434  | 403.4727752 | 2.8626<br>77789 | 1.517365<br>296      | 9.84<br>E-05 | 0.00<br>2056 | Up       |
| M-SAA3.2 | 12903.<br>11584 | 557.0041351 | 25249.22754 | 45.330<br>41309 | 5.502407<br>403      | 9.93<br>E-23 | 8.20<br>E-20 | Up       |
| MSI1     | 33.526<br>61219 | 8.576216832 | 58.47700754 | 6.8185<br>08521 | 2.769456<br>199      | 0.00<br>0124 | 0.00<br>2465 | Up       |
| MSLN     | 225.00<br>64189 | 66.70195695 | 383.3108808 | 5.7466<br>21214 | 2.522713<br>958      | 0.01<br>9019 | 0.11<br>7524 | Up       |
| MSN      | 10424.<br>37318 | 14054.12938 | 6794.616985 | 0.4834<br>6054  | -<br>1.048529<br>952 | 0.00<br>2111 | 0.02<br>3299 | Dow<br>n |
| MSRB3    | 3659.3<br>50227 | 5630.607146 | 1688.093308 | 0.2998<br>06622 | -<br>1.737895<br>846 | 0.03<br>94   | 0.19<br>3901 | Dow<br>n |
| MSX1     | 267.57<br>19819 | 442.662591  | 92.4813728  | 0.2089<br>20687 | -<br>2.258972<br>739 | 0.01<br>5083 | 0.09<br>9538 | Dow<br>n |
| MT1A     | 246.91<br>63068 | 32.19063674 | 461.6419768 | 14.340<br>87746 | 3.842061<br>394      | 3.10<br>E-10 | 2.96<br>E-08 | Up       |
| MT1E     | 134.02<br>05905 | 53.10703939 | 214.9341415 | 4.0471<br>87416 | 2.016919<br>658      | 0.00<br>3234 | 0.03<br>2209 | Up       |
| MTHFD2   | 246.05<br>88515 | 346.053289  | 146.064414  | 0.4220<br>86478 | -<br>1.244389<br>483 | 0.00<br>1584 | 0.01<br>8768 | Dow<br>n |
| MTMR11   | 609.79          | 849.7458969 | 369.8392365 | 0.4352          | -                    | 0.00         | 0.01         | Dow      |

|         |                 |             |             |                 |                      |              |              |          |
|---------|-----------------|-------------|-------------|-----------------|----------------------|--------------|--------------|----------|
|         | 25667           |             |             | 35095           | 1.200133<br>201      | 0934         | 2555         | n        |
| MTMR7   | 101.04<br>73848 | 158.3876753 | 43.70709423 | 0.2759<br>50096 | -<br>1.857520<br>707 | 0.01<br>4194 | 0.09<br>5444 | Dow<br>n |
| MTPN    | 1083.6<br>70549 | 1478.92725  | 688.413847  | 0.4654<br>81887 | -<br>1.103203<br>065 | 0.00<br>1985 | 0.02<br>2165 | Dow<br>n |
| MTSS1   | 3171.2<br>0145  | 2029.617549 | 4312.78535  | 2.1249<br>25138 | 1.087412<br>015      | 0.00<br>4688 | 0.04<br>2382 | Up       |
| MUC16   | 101.19<br>53829 | 26.32162274 | 176.069143  | 6.6891<br>4469  | 2.741821<br>752      | 7.21<br>E-06 | 0.00<br>0227 | Up       |
| MX2     | 115.91<br>88573 | 56.3442212  | 175.4934934 | 3.1146<br>67125 | 1.639077<br>986      | 0.04<br>0313 | 0.19<br>6796 | Up       |
| MXRA7   | 5376.9<br>45851 | 8613.528681 | 2140.363021 | 0.2484<br>88523 | -<br>2.008748<br>875 | 0.01<br>9407 | 0.11<br>8794 | Dow<br>n |
| MXRA8   | 2563.3<br>54291 | 3425.434401 | 1701.274181 | 0.4966<br>59396 | -<br>1.009671<br>289 | 0.02<br>1465 | 0.12<br>8061 | Dow<br>n |
| MYADM   | 8187.6<br>38923 | 11866.16196 | 4509.115883 | 0.3799<br>97837 | -<br>1.395936<br>887 | 4.64<br>E-05 | 0.00<br>1096 | Dow<br>n |
| MYB     | 693.43<br>21658 | 78.81227432 | 1308.052057 | 16.597<br>06015 | 4.052855<br>813      | 1.42<br>E-23 | 1.43<br>E-20 | Up       |
| MYBPH   | 523.59<br>62584 | 116.959217  | 930.2332999 | 7.9534<br>84335 | 2.991587<br>028      | 4.31<br>E-13 | 6.80<br>E-11 | Up       |
| MYCBPAP | 110.80<br>52988 | 49.15160505 | 172.4589925 | 3.5087<br>15379 | 1.810942<br>923      | 0.00<br>0108 | 0.00<br>2199 | Up       |
| MYCL    | 90.820<br>70791 | 45.81227828 | 135.8291375 | 2.9649<br>06846 | 1.567986<br>778      | 0.00<br>1609 | 0.01<br>896  | Up       |
| MYCT1   | 794.29<br>57203 | 1134.01343  | 454.5780107 | 0.4008<br>57696 | -<br>1.318837<br>922 | 0.01<br>1434 | 0.08<br>1183 | Dow<br>n |
| MYF5    | 24.521<br>7421  | 44.23772666 | 4.805757528 | 0.1086<br>34821 | -<br>3.202441<br>484 | 0.01<br>2192 | 0.08<br>5064 | Dow<br>n |
| MYH10   | 5345.1<br>12075 | 7747.071671 | 2943.152479 | 0.3799<br>05157 | -<br>1.396288<br>799 | 0.01<br>0056 | 0.07<br>4126 | Dow<br>n |
| MYH14   | 1159.2<br>34346 | 435.3872989 | 1883.081394 | 4.3250<br>71951 | 2.112724<br>133      | 1.01<br>E-08 | 6.86<br>E-07 | Up       |
| MYH7B   | 58.324<br>19955 | 32.70769478 | 83.94070431 | 2.5663<br>90107 | 1.359740<br>485      | 0.01<br>3663 | 0.09<br>2694 | Up       |

|        |             |             |             |             |              |          |          |      |
|--------|-------------|-------------|-------------|-------------|--------------|----------|----------|------|
| MYL6   | 27345.96887 | 39684.8323  | 15007.10545 | 0.37815721  | -1.40294197  | 0.03328  | 0.173421 | Down |
| MYLK   | 18528.65382 | 31990.60929 | 5066.698349 | 0.158380802 | -2.658530626 | 0.02602  | 0.14625  | Down |
| MYO18B | 14.27358977 | 27.15232305 | 1.394856483 | 0.051371534 | -4.282887039 | 0.013935 | 0.094231 | Down |
| MYO3A  | 209.6801215 | 26.73577033 | 392.6244727 | 14.68536226 | 3.87630695   | 5.07E-05 | 0.001183 | Up   |
| MYO5B  | 660.3960385 | 284.7384904 | 1036.053587 | 3.638614454 | 1.863389192  | 7.32E-06 | 0.000228 | Up   |
| MYO7A  | 41.35218569 | 62.44209506 | 20.26227633 | 0.324497061 | -1.623722683 | 0.02931  | 0.159035 | Down |
| MYOCD  | 1614.680027 | 2870.043606 | 359.316448  | 0.125195466 | -2.997745774 | 0.007794 | 0.06184  | Down |
| MYOZ1  | 76.13479977 | 40.35917704 | 111.9104225 | 2.772861855 | 1.471375742  | 0.003991 | 0.037331 | Up   |
| MYRF   | 251.2610611 | 384.4035643 | 118.118558  | 0.307277479 | -1.702386064 | 2.61E-05 | 0.000675 | Down |
| MZB1   | 129.2301861 | 46.63599312 | 211.8243791 | 4.542079302 | 2.183352895  | 1.78E-06 | 6.73E-05 | Up   |
| N4BP3  | 989.5385405 | 489.0975762 | 1489.979505 | 3.04638497  | 1.607098266  | 7.91E-06 | 0.000244 | Up   |
| NALCN  | 7.91976241  | 13.91747313 | 1.922051688 | 0.138103495 | -2.85617826  | 0.035941 | 0.182423 | Down |
| NARS2  | 604.1288352 | 354.0391438 | 854.2185267 | 2.412779891 | 1.27069631   | 0.000495 | 0.007661 | Up   |
| NBEAL1 | 320.2102684 | 488.7401531 | 151.6803837 | 0.310349749 | -1.688033117 | 0.001523 | 0.01819  | Down |
| NCALD  | 656.6798562 | 939.1971832 | 374.1625292 | 0.398385489 | -1.327762996 | 0.000279 | 0.004802 | Down |
| NCAM1  | 600.5691702 | 1168.534929 | 32.60341154 | 0.027901101 | -5.163534116 | 0.009659 | 0.072179 | Down |
| NCAM2  | 124.2100219 | 40.80634381 | 207.6136999 | 5.08778     | 2.347036289  | 7.48E-07 | 3.09E-05 | Up   |

|          |                 |             |             |                 |                      |              |              |      |
|----------|-----------------|-------------|-------------|-----------------|----------------------|--------------|--------------|------|
| NCK2     | 918.47<br>27932 | 600.5940423 | 1236.351544 | 2.0585<br>47799 | 1.041626<br>948      | 0.00<br>3596 | 0.03<br>4723 | Up   |
| NCMAP    | 32.881<br>17945 | 8.179879915 | 57.58247899 | 7.0395<br>26201 | 2.815478<br>331      | 0.00<br>0114 | 0.00<br>2283 | Up   |
| NCS1     | 611.30<br>07646 | 990.5969332 | 232.004596  | 0.2342<br>06859 | -<br>2.094144<br>769 | 0.00<br>121  | 0.01<br>53   | Down |
| NDNF     | 575.64<br>76012 | 278.4494658 | 872.8457366 | 3.1346<br>64791 | 1.648311<br>175      | 0.00<br>0159 | 0.00<br>3045 | Up   |
| NDST3    | 35.273<br>31389 | 50.70572787 | 19.84089991 | 0.3912<br>95042 | -<br>1.353671<br>265 | 0.03<br>9471 | 0.19<br>4042 | Down |
| NDUFA4L2 | 424.95<br>55475 | 625.5191477 | 224.3919473 | 0.3587<br>29142 | -<br>1.479033<br>144 | 0.00<br>3207 | 0.03<br>2008 | Down |
| NEB      | 27.042<br>90041 | 42.24360641 | 11.84219441 | 0.2803<br>31047 | -<br>1.834796<br>562 | 0.01<br>2808 | 0.08<br>831  | Down |
| NECAB3   | 257.82<br>9825  | 363.9445888 | 151.7150611 | 0.4168<br>63077 | -<br>1.262354<br>502 | 0.00<br>1392 | 0.01<br>7103 | Down |
| NEDD4    | 853.04<br>89352 | 1169.229366 | 536.8685044 | 0.4591<br>64404 | -<br>1.122917<br>293 | 0.00<br>1536 | 0.01<br>8315 | Down |
| NEDD4L   | 1756.9<br>61119 | 881.5145086 | 2632.40773  | 2.9862<br>33016 | 1.578326<br>743      | 8.37<br>E-06 | 0.00<br>0257 | Up   |
| NEFM     | 465.46<br>18662 | 70.04088592 | 860.8828465 | 12.291<br>14731 | 3.619547<br>684      | 0.00<br>1616 | 0.01<br>8989 | Up   |
| NEK10    | 34.777<br>13063 | 12.90469806 | 56.6495632  | 4.3898<br>40268 | 2.134168<br>446      | 0.00<br>1701 | 0.01<br>9755 | Up   |
| NEK6     | 4343.8<br>18779 | 2521.66121  | 6165.976348 | 2.4452<br>04107 | 1.289954<br>895      | 0.00<br>0238 | 0.00<br>4204 | Up   |
| NEURL1   | 811.72<br>32993 | 86.42022159 | 1537.026377 | 17.785<br>49451 | 4.152629<br>183      | 7.75<br>E-25 | 9.38<br>E-22 | Up   |
| NEXN     | 2343.1<br>66674 | 4379.931176 | 306.4021722 | 0.0699<br>55933 | -<br>3.837409<br>77  | 0.00<br>3692 | 0.03<br>5405 | Down |
| NFATC1   | 994.40<br>5266  | 1399.225457 | 589.5850746 | 0.4213<br>65314 | -<br>1.246856<br>535 | 0.04<br>3473 | 0.20<br>6936 | Down |
| NFATC4   | 1513.2<br>02677 | 2144.77464  | 881.6307139 | 0.4110<br>59837 | -<br>1.282579<br>676 | 0.00<br>1821 | 0.02<br>0808 | Down |
| NFE2L3   | 770.45          | 176.1794474 | 1364.73681  | 7.7462          | 2.953505             | 1.64         | 3.31         | Up   |



|        |                 |             |             |                 |                      |              |              |          |
|--------|-----------------|-------------|-------------|-----------------|----------------------|--------------|--------------|----------|
|        | 81285           |             |             | 88402           | 215                  | E-14         | E-12         |          |
| NFIL3  | 903.26<br>54601 | 1204.745627 | 601.7852928 | 0.4995<br>12328 | -<br>1.001407<br>811 | 0.00<br>9526 | 0.07<br>1435 | Dow<br>n |
| NGFR   | 2286.9<br>11916 | 721.7816353 | 3852.042197 | 5.3368<br>526   | 2.415989<br>166      | 2.80<br>E-11 | 3.27<br>E-09 | Up       |
| NHS    | 322.35<br>28869 | 458.9339294 | 185.7718443 | 0.4047<br>89954 | -<br>1.304754<br>608 | 0.00<br>3477 | 0.03<br>3938 | Dow<br>n |
| NHSL1  | 1600.6<br>98058 | 585.4123382 | 2615.983777 | 4.4686<br>17429 | 2.159828<br>537      | 1.51<br>E-09 | 1.29<br>E-07 | Up       |
| NHSL2  | 1844.3<br>12476 | 2982.163747 | 706.4612042 | 0.2368<br>95511 | -<br>2.077677<br>235 | 0.00<br>0214 | 0.00<br>3908 | Dow<br>n |
| NID1   | 7269.3<br>24713 | 12293.50784 | 2245.141581 | 0.1826<br>2823  | -<br>2.453018<br>304 | 0.00<br>0966 | 0.01<br>2895 | Dow<br>n |
| NID2   | 4179.9<br>69378 | 6601.781365 | 1758.15739  | 0.2663<br>15604 | -<br>1.908791<br>134 | 1.77<br>E-07 | 8.55<br>E-06 | Dow<br>n |
| NIM1K  | 52.256<br>8567  | 24.21887849 | 80.29483492 | 3.3153<br>82045 | 1.729175<br>128      | 0.00<br>2633 | 0.02<br>7507 | Up       |
| NIPAL4 | 121.23<br>57833 | 210.8230422 | 31.64852444 | 0.1501<br>18906 | -<br>2.735822<br>414 | 0.00<br>219  | 0.02<br>394  | Dow<br>n |
| NKAIN1 | 50.694<br>72432 | 84.77999933 | 16.60944931 | 0.1959<br>12355 | -<br>2.351719<br>714 | 0.02<br>3665 | 0.13<br>7125 | Dow<br>n |
| NKAIN3 | 128.62<br>63404 | 205.4271747 | 51.8255061  | 0.2522<br>81648 | -<br>1.986892<br>834 | 0.00<br>0757 | 0.01<br>0639 | Dow<br>n |
| NKG7   | 531.94<br>4906  | 246.7549095 | 817.1349025 | 3.3115<br>24395 | 1.727495<br>486      | 3.54<br>E-06 | 0.00<br>0122 | Up       |
| NKPD1  | 477.82<br>15917 | 179.8140621 | 775.8291213 | 4.3146<br>18735 | 2.109233<br>08       | 3.64<br>E-08 | 2.07<br>E-06 | Up       |
| NKX2-2 | 24.910<br>48586 | 43.18290155 | 6.638070162 | 0.1537<br>19873 | -<br>2.701624<br>401 | 0.04<br>5658 | 0.21<br>4553 | Dow<br>n |
| NKX3-1 | 26.193<br>61868 | 1.981044628 | 50.40619274 | 25.444<br>24898 | 4.669267<br>704      | 5.60<br>E-07 | 2.44<br>E-05 | Up       |
| NLGN4X | 5.1642<br>92727 | 10.32858545 | 0           | 0               | #NAME?               | 0.00<br>3706 | 0.03<br>5525 | Dow<br>n |
| NLRC4  | 59.829<br>98903 | 34.19366234 | 85.46631571 | 2.4994<br>78262 | 1.321626<br>98       | 0.01<br>9108 | 0.11<br>7832 | Up       |

|       |                 |             |             |                 |                      |              |              |      |
|-------|-----------------|-------------|-------------|-----------------|----------------------|--------------|--------------|------|
| NLRP1 | 220.29<br>98831 | 117.2047331 | 323.395033  | 2.7592<br>31853 | 1.464266<br>689      | 0.00<br>0257 | 0.00<br>4486 | Up   |
| NMB   | 275.66<br>65193 | 499.9704087 | 51.36262986 | 0.1027<br>3134  | -<br>3.283051<br>732 | 1.18<br>E-12 | 1.76<br>E-10 | Down |
| NME8  | 49.211<br>06045 | 21.59841507 | 76.82370584 | 3.5569<br>14042 | 1.830626<br>11       | 0.01<br>0183 | 0.07<br>4716 | Up   |
| NOD2  | 853.66<br>85255 | 381.8866211 | 1325.45043  | 3.4707<br>95667 | 1.795266<br>433      | 1.01<br>E-05 | 0.00<br>0301 | Up   |
| NOVA1 | 55.406<br>83469 | 95.20560581 | 15.60806358 | 0.1639<br>40594 | -<br>2.608754<br>964 | 0.00<br>1525 | 0.01<br>8202 | Down |
| NOVA2 | 91.642<br>51421 | 128.9361645 | 54.34886388 | 0.4215<br>1761  | -<br>1.246335<br>191 | 0.00<br>8777 | 0.06<br>7375 | Down |
| NOX4  | 208.77<br>67226 | 371.5809712 | 45.97247396 | 0.1237<br>21282 | -<br>3.014834<br>412 | 6.80<br>E-07 | 2.85<br>E-05 | Down |
| NOXA1 | 816.91<br>62865 | 297.1720334 | 1336.66054  | 4.4979<br>35167 | 2.169262<br>866      | 5.49<br>E-09 | 4.02<br>E-07 | Up   |
| NPAS3 | 146.92<br>16494 | 75.51660808 | 218.3266908 | 2.8911<br>08279 | 1.531622<br>642      | 0.00<br>0607 | 0.00<br>8927 | Up   |
| NPAS4 | 25.107<br>18463 | 47.2100215  | 3.004347756 | 0.0636<br>37924 | -<br>3.973969<br>419 | 0.02<br>2114 | 0.13<br>0604 | Down |
| NPC2  | 6402.0<br>3694  | 4016.782634 | 8787.291245 | 2.1876<br>44204 | 1.129378<br>119      | 0.00<br>1013 | 0.01<br>3366 | Up   |
| NPHS1 | 4.3073<br>5211  | 0           | 8.614704219 | Inf             | Inf                  | 0.02<br>0043 | 0.12<br>1535 | Up   |
| NPPB  | 14.335<br>10991 | 28.40070926 | 0.269510562 | 0.0094<br>89572 | -<br>6.719441<br>338 | 0.00<br>986  | 0.07<br>3181 | Down |
| NPPC  | 13.538<br>98476 | 25.71859079 | 1.359378727 | 0.0528<br>55879 | -<br>4.241792<br>238 | 0.02<br>5506 | 0.14<br>4257 | Down |
| NPR1  | 1112.9<br>09469 | 1711.116119 | 514.7028185 | 0.3007<br>99468 | -<br>1.733126<br>079 | 0.00<br>0166 | 0.00<br>3165 | Down |
| NPR3  | 182.36<br>67184 | 356.0320185 | 8.701418398 | 0.0244<br>39988 | -<br>5.354612<br>59  | 0.00<br>2406 | 0.02<br>576  | Down |
| NPSR1 | 3.7316<br>61865 | 0           | 7.463323731 | Inf             | Inf                  | 0.03<br>4418 | 0.17<br>7767 | Up   |
| NPTN  | 2288.9          | 3056.730286 | 1521.211345 | 0.4976          | -                    | 0.03         | 0.16         | Down |

|       |                 |             |             |                 |                      |              |              |          |
|-------|-----------------|-------------|-------------|-----------------|----------------------|--------------|--------------|----------|
|       | 70815           |             |             | 59657           | 1.006768<br>657      | 1906         | 8485         | n        |
| NPW   | 36.839<br>85255 | 14.38777523 | 59.29192987 | 4.1209<br>93615 | 2.042992<br>228      | 0.03<br>1534 | 0.16<br>696  | Up       |
| NPY1R | 1474.9<br>65542 | 2721.603261 | 228.3278237 | 0.0838<br>94603 | -<br>3.575278<br>194 | 0.00<br>5019 | 0.04<br>4736 | Dow<br>n |
| NPY5R | 155.20<br>48891 | 284.4520089 | 25.95776928 | 0.0912<br>55356 | -<br>3.453946<br>957 | 0.02<br>6909 | 0.14<br>9538 | Dow<br>n |
| NR3C2 | 583.16<br>72527 | 365.2133949 | 801.1211105 | 2.1935<br>69901 | 1.133280<br>68       | 0.00<br>2515 | 0.02<br>6563 | Up       |
| NR4A1 | 4089.8<br>82031 | 7759.12203  | 420.6420324 | 0.0542<br>12581 | -<br>4.205228<br>493 | 0.02<br>9398 | 0.15<br>922  | Dow<br>n |
| NRG1  | 217.69<br>08492 | 92.2170144  | 343.164684  | 3.7212<br>7298  | 1.895796<br>226      | 5.63<br>E-06 | 0.00<br>0183 | Up       |
| NRG3  | 14.052<br>23721 | 3.618832617 | 24.4856418  | 6.7661<br>71414 | 2.758339<br>727      | 0.00<br>9763 | 0.07<br>2702 | Up       |
| NRIP2 | 109.94<br>46692 | 72.05105168 | 147.8382866 | 2.0518<br>54667 | 1.036928<br>548      | 0.02<br>7731 | 0.15<br>2747 | Up       |
| NRIP3 | 130.22<br>42189 | 230.7665649 | 29.68187288 | 0.1286<br>22935 | -<br>2.958780<br>179 | 0.00<br>7501 | 0.06<br>0234 | Dow<br>n |
| NRK   | 23.160<br>40645 | 40.99875053 | 5.322062359 | 0.1298<br>10355 | -<br>2.945522<br>623 | 0.00<br>0368 | 0.00<br>6055 | Dow<br>n |
| NRP2  | 3394.7<br>78274 | 4817.481164 | 1972.075383 | 0.4093<br>58193 | -<br>1.288564<br>325 | 0.00<br>0168 | 0.00<br>3181 | Dow<br>n |
| NRTN  | 34.066<br>49999 | 13.15021422 | 54.98278576 | 4.1811<br>32324 | 2.063893<br>702      | 0.00<br>2919 | 0.02<br>9826 | Up       |
| NSUN7 | 120.44<br>31169 | 32.66999888 | 208.2162349 | 6.3733<br>16256 | 2.672044<br>252      | 4.16<br>E-08 | 2.30<br>E-06 | Up       |
| NTAN1 | 2289.7<br>57422 | 3097.234134 | 1482.280709 | 0.4785<br>82065 | -<br>1.063161<br>761 | 0.02<br>3304 | 0.13<br>5601 | Dow<br>n |
| NTF4  | 121.46<br>70063 | 37.47720229 | 205.4568104 | 5.4821<br>81108 | 2.454749<br>989      | 3.49<br>E-07 | 1.58<br>E-05 | Up       |
| NTM   | 11.197<br>80821 | 21.06320781 | 1.332408614 | 0.0632<br>5763  | -<br>3.982616<br>676 | 0.00<br>1209 | 0.01<br>53   | Dow<br>n |
| NTN1  | 617.86<br>33144 | 328.9351004 | 906.7915283 | 2.7567<br>49058 | 1.462967<br>947      | 7.55<br>E-05 | 0.00<br>1647 | Up       |

|         |                 |             |             |                 |                      |              |              |      |
|---------|-----------------|-------------|-------------|-----------------|----------------------|--------------|--------------|------|
| NTNG1   | 101.43<br>64541 | 66.64826587 | 136.2246423 | 2.0439<br>33784 | 1.031348<br>459      | 0.02<br>6945 | 0.14<br>9599 | Up   |
| NUAK1   | 236.03<br>47499 | 323.4130201 | 148.6564798 | 0.4596<br>49026 | -<br>1.121395<br>411 | 0.00<br>6154 | 0.05<br>177  | Down |
| NUCB1   | 10111.<br>4625  | 13572.79423 | 6650.130765 | 0.4899<br>60332 | -<br>1.029263<br>144 | 0.01<br>3048 | 0.08<br>95   | Down |
| NUCB2   | 1628.8<br>48118 | 2382.26049  | 875.4357471 | 0.3674<br>81118 | -<br>1.444257<br>974 | 6.17<br>E-05 | 0.00<br>1407 | Down |
| NUGGC   | 131.97<br>52562 | 25.71959046 | 238.2309219 | 9.2626<br>25011 | 3.211421<br>109      | 6.33<br>E-06 | 0.00<br>0203 | Up   |
| NUP210  | 600.36<br>47131 | 297.3341815 | 903.3952447 | 3.0383<br>16147 | 1.603271<br>995      | 1.34<br>E-05 | 0.00<br>038  | Up   |
| NUP62CL | 153.31<br>2839  | 96.87141888 | 209.7542591 | 2.1652<br>85298 | 1.114557<br>127      | 0.00<br>8043 | 0.06<br>3323 | Up   |
| NUPL2   | 100.99<br>56167 | 135.0990399 | 66.89219349 | 0.4951<br>34485 | -<br>1.014107<br>663 | 0.02<br>8074 | 0.15<br>3937 | Down |
| NWD1    | 9.7721<br>97857 | 2.540512439 | 17.00388327 | 6.6930<br>91917 | 2.742672<br>827      | 0.02<br>6669 | 0.14<br>8477 | Up   |
| NXPE4   | 253.13<br>67523 | 338.2555372 | 168.0179674 | 0.4967<br>19045 | -<br>1.009498<br>032 | 0.01<br>0608 | 0.07<br>7162 | Down |
| NXPH2   | 26.263<br>98663 | 5.648427507 | 46.87954575 | 8.2995<br>7465  | 3.053037<br>401      | 0.00<br>0177 | 0.00<br>3343 | Up   |
| NXPH4   | 35.887<br>43514 | 59.28422428 | 12.490646   | 0.2106<br>9089  | -<br>2.246800<br>157 | 0.00<br>1759 | 0.02<br>0262 | Down |
| OAF     | 1260.0<br>94871 | 1948.94412  | 571.2456226 | 0.2931<br>05183 | -<br>1.770509<br>616 | 4.81<br>E-05 | 0.00<br>1131 | Down |
| OBSL1   | 1638.1<br>23765 | 1026.873432 | 2249.374097 | 2.1905<br>07638 | 1.131265<br>245      | 0.00<br>1103 | 0.01<br>4281 | Up   |
| OCLN    | 1068.5<br>5363  | 651.8077328 | 1485.299528 | 2.2787<br>38734 | 1.188235<br>524      | 0.01<br>4357 | 0.09<br>6219 | Up   |
| ODF3B   | 29.643<br>64206 | 3.222495701 | 56.06478842 | 17.397<br>94049 | 4.120844<br>63       | 9.50<br>E-07 | 3.85<br>E-05 | Up   |
| OGN     | 18551.<br>63764 | 34368.96535 | 2734.309921 | 0.0795<br>57528 | -<br>3.651857<br>741 | 0.01<br>1175 | 0.07<br>9908 | Down |
| OLFML1  | 1640.8<br>88954 | 2562.680079 | 719.0978292 | 0.2806<br>03824 | -<br>1.833393        | 0.00<br>5518 | 0.04<br>7732 | Down |

|         |                 |             |             |                 |                      |              |              |          |
|---------|-----------------|-------------|-------------|-----------------|----------------------|--------------|--------------|----------|
|         |                 |             |             |                 | 426                  |              |              |          |
| OLFML2B | 1816.1<br>12103 | 3205.0667   | 427.1575065 | 0.1332<br>757   | -<br>2.907514<br>34  | 0.00<br>3073 | 0.03<br>1044 | Dow<br>n |
| OMD     | 181.08<br>62089 | 336.6954756 | 25.4769422  | 0.0756<br>67611 | -<br>3.724180<br>297 | 0.02<br>5615 | 0.14<br>4555 | Dow<br>n |
| OPN1LW  | 45.474<br>52923 | 88.73384438 | 2.215214086 | 0.0249<br>64703 | -<br>5.323966<br>437 | 0.03<br>758  | 0.18<br>7604 | Dow<br>n |
| OR2H1   | 40.330<br>24018 | 21.78355609 | 58.87692428 | 2.7028<br>15098 | 1.434462<br>819      | 0.02<br>5915 | 0.14<br>5798 | Up       |
| OR4D9   | 8.1539<br>12633 | 15.46381583 | 0.844009441 | 0.0545<br>79636 | -<br>4.195493<br>414 | 0.02<br>8802 | 0.15<br>679  | Dow<br>n |
| OR51E1  | 822.67<br>38311 | 342.0227977 | 1303.324865 | 3.8106<br>374   | 1.930032<br>335      | 1.71<br>E-07 | 8.27<br>E-06 | Up       |
| ORM1    | 54.183<br>85272 | 2.910309217 | 105.4573962 | 36.235<br>80464 | 5.179344<br>026      | 0.00<br>3709 | 0.03<br>5537 | Up       |
| OSBPL3  | 614.08<br>61999 | 327.6756257 | 900.4967742 | 2.7481<br>34752 | 1.458452<br>747      | 6.21<br>E-05 | 0.00<br>1414 | Up       |
| OSBPL6  | 564.11<br>65182 | 755.2312432 | 373.0017932 | 0.4938<br>9084  | -<br>1.017735<br>883 | 0.00<br>5547 | 0.04<br>7887 | Dow<br>n |
| OSR2    | 258.40<br>66816 | 374.9158644 | 141.8974988 | 0.3784<br>78246 | -<br>1.401717<br>714 | 0.02<br>9283 | 0.15<br>9035 | Dow<br>n |
| OSTN    | 103.19<br>29929 | 202.8383631 | 3.5476227   | 0.0174<br>899   | -<br>5.837334<br>143 | 7.74<br>E-08 | 4.06<br>E-06 | Dow<br>n |
| OVGP1   | 104.42<br>75213 | 68.16256789 | 140.6924746 | 2.0640<br>72393 | 1.045493<br>571      | 0.02<br>4323 | 0.13<br>9734 | Up       |
| OVOL2   | 246.89<br>3953  | 79.68214226 | 414.1057637 | 5.1969<br>70763 | 2.377670<br>943      | 1.92<br>E-08 | 1.19<br>E-06 | Up       |
| OXCT1   | 1067.9<br>74473 | 1503.746246 | 632.2027    | 0.4204<br>18473 | -<br>1.250102<br>034 | 0.00<br>0401 | 0.00<br>646  | Dow<br>n |
| OXTR    | 179.80<br>28128 | 115.6354389 | 243.9701867 | 2.1098<br>21946 | 1.077121<br>251      | 0.01<br>1194 | 0.07<br>9982 | Up       |
| P2RX3   | 170.67<br>86995 | 58.34088439 | 283.0165147 | 4.8510<br>83724 | 2.278307<br>079      | 2.54<br>E-07 | 1.19<br>E-05 | Up       |
| P2RX6   | 20.539<br>09276 | 37.10461151 | 3.973574005 | 0.1070<br>91109 | -<br>3.223089<br>383 | 0.01<br>5592 | 0.10<br>1558 | Dow<br>n |

|               |                 |             |             |                 |                      |              |              |          |
|---------------|-----------------|-------------|-------------|-----------------|----------------------|--------------|--------------|----------|
| P2RY1         | 40.683<br>01124 | 59.54394129 | 21.82208119 | 0.3664<br>87013 | -<br>1.448166<br>019 | 0.02<br>1263 | 0.12<br>7149 | Dow<br>n |
| P2RY10        | 53.037<br>70148 | 26.00812719 | 80.06727576 | 3.0785<br>483   | 1.622250<br>204      | 0.00<br>3944 | 0.03<br>6966 | Up       |
| P2RY11        | 18.971<br>12671 | 7.022579275 | 30.91967415 | 4.4028<br>94284 | 2.138452<br>205      | 0.01<br>5311 | 0.10<br>0497 | Up       |
| P2RY13        | 82.015<br>95343 | 50.41294135 | 113.6189655 | 2.2537<br>65848 | 1.172337<br>636      | 0.01<br>6856 | 0.10<br>7564 | Up       |
| P2RY2         | 167.18<br>2564  | 48.35960032 | 286.0055277 | 5.9141<br>41675 | 2.564168<br>804      | 1.39<br>E-08 | 8.90<br>E-07 | Up       |
| P2RY6         | 139.29<br>54733 | 49.64279206 | 228.9481546 | 4.6119<br>11318 | 2.205364<br>772      | 1.42<br>E-06 | 5.52<br>E-05 | Up       |
| P3H1          | 2298.1<br>03773 | 3393.473858 | 1202.733689 | 0.3544<br>25506 | -<br>1.496445<br>665 | 0.00<br>0122 | 0.00<br>2436 | Dow<br>n |
| P3H4          | 1103.5<br>02886 | 1796.548101 | 410.4576713 | 0.2284<br>70182 | -<br>2.129922<br>207 | 0.00<br>0166 | 0.00<br>3155 | Dow<br>n |
| P4HA1         | 1927.3<br>0043  | 3029.607133 | 824.9937278 | 0.2723<br>10465 | -<br>1.876675<br>667 | 1.86<br>E-06 | 6.93<br>E-05 | Dow<br>n |
| P4HA2         | 3596.7<br>9812  | 5730.090055 | 1463.506185 | 0.2554<br>07188 | -<br>1.969128<br>97  | 2.52<br>E-05 | 0.00<br>0656 | Dow<br>n |
| P4HA3         | 529.32<br>60055 | 1004.369555 | 54.2824556  | 0.0540<br>46297 | -<br>4.209660<br>407 | 0.00<br>1335 | 0.01<br>6552 | Dow<br>n |
| PABPC1L2<br>A | 91.412<br>90049 | 40.41678734 | 142.4090136 | 3.5235<br>11467 | 1.817013<br>909      | 0.00<br>0227 | 0.00<br>4072 | Up       |
| PABPC5        | 26.505<br>72402 | 45.17769091 | 7.83375712  | 0.1733<br>98794 | -<br>2.527834<br>23  | 0.00<br>0881 | 0.01<br>1952 | Dow<br>n |
| PACSIN1       | 69.346<br>88947 | 22.80475123 | 115.8890277 | 5.0817<br>93111 | 2.345337<br>642      | 2.04<br>E-05 | 0.00<br>0547 | Up       |
| PACSIN3       | 865.80<br>14639 | 562.5829169 | 1169.020011 | 2.0779<br>51491 | 1.055161<br>975      | 0.00<br>3364 | 0.03<br>3085 | Up       |
| PADI2         | 514.85<br>6959  | 174.9603582 | 854.7535597 | 4.8854<br>12723 | 2.288480<br>447      | 2.52<br>E-09 | 1.98<br>E-07 | Up       |
| PAG1          | 43.756<br>43137 | 62.87439187 | 24.63847087 | 0.3918<br>68138 | -<br>1.351559<br>82  | 0.02<br>5093 | 0.14<br>2677 | Dow<br>n |
| PAK4          | 1751.5<br>41823 | 960.0370246 | 2543.046622 | 2.6489<br>04737 | 1.405395<br>961      | 8.03<br>E-05 | 0.00<br>1735 | Up       |

|        |                 |             |             |                 |                      |              |              |      |
|--------|-----------------|-------------|-------------|-----------------|----------------------|--------------|--------------|------|
| PAK6   | 345.73<br>05965 | 152.7610228 | 538.7001702 | 3.5264<br>24216 | 1.818206<br>036      | 7.89<br>E-05 | 0.00<br>1711 | Up   |
| PALD1  | 370.46<br>25716 | 526.496012  | 214.4291312 | 0.4072<br>75889 | -<br>1.295921<br>688 | 0.00<br>0592 | 0.00<br>877  | Down |
| PALLD  | 6613.4<br>67179 | 10126.58695 | 3100.347404 | 0.3061<br>59165 | -<br>1.707646<br>225 | 0.01<br>4405 | 0.09<br>629  | Down |
| PALM2  | 137.89<br>04053 | 209.9138176 | 65.86699303 | 0.3137<br>81121 | -<br>1.672169<br>541 | 0.04<br>2026 | 0.20<br>2006 | Down |
| PALM3  | 203.28<br>98636 | 110.3275536 | 296.2521737 | 2.6852<br>05682 | 1.425032<br>601      | 0.00<br>0709 | 0.01<br>0093 | Up   |
| PANX2  | 52.718<br>66045 | 9.447871128 | 95.98944977 | 10.159<br>90253 | 3.344814<br>656      | 1.24<br>E-07 | 6.21<br>E-06 | Up   |
| PAPLN  | 6011.9<br>52977 | 1576.499283 | 10447.40667 | 6.6269<br>65696 | 2.728348<br>451      | 7.69<br>E-09 | 5.39<br>E-07 | Up   |
| PAPPA  | 199.23<br>6486  | 345.3040087 | 53.16896326 | 0.1539<br>77255 | -<br>2.699210<br>842 | 0.00<br>0216 | 0.00<br>3933 | Down |
| PAPPA2 | 584.14<br>30125 | 858.2534732 | 310.0325518 | 0.3612<br>36583 | -<br>1.468984<br>092 | 6.11<br>E-05 | 0.00<br>1398 | Down |
| PAQR7  | 526.12<br>18192 | 905.1004925 | 147.1431458 | 0.1625<br>71059 | -<br>2.620857<br>641 | 0.00<br>5924 | 0.05<br>047  | Down |
| PARD6B | 85.705<br>06244 | 33.6691839  | 137.740941  | 4.0910<br>09197 | 2.032456<br>781      | 7.84<br>E-05 | 0.00<br>1704 | Up   |
| PARP10 | 1128.5<br>98652 | 695.7962512 | 1561.401052 | 2.2440<br>49244 | 1.166104<br>335      | 0.00<br>1036 | 0.01<br>3639 | Up   |
| PARVA  | 1789.2<br>18017 | 2460.665278 | 1117.770757 | 0.4542<br>55508 | -<br>1.138424<br>086 | 0.00<br>4748 | 0.04<br>2844 | Down |
| PARVB  | 414.88<br>08264 | 638.028635  | 191.7330179 | 0.3005<br>08484 | -<br>1.734522<br>373 | 0.00<br>011  | 0.00<br>2214 | Down |
| PARVG  | 119.05<br>45058 | 74.41107866 | 163.6979329 | 2.1999<br>13452 | 1.137446<br>767      | 0.01<br>0664 | 0.07<br>7539 | Up   |
| PATZ1  | 1289.2<br>93113 | 668.6620977 | 1909.924129 | 2.8563<br>36759 | 1.514166<br>082      | 2.74<br>E-05 | 0.00<br>0705 | Up   |
| PAX1   | 21.955<br>292   | 6.035704392 | 37.87487962 | 6.2751<br>3827  | 2.649647<br>249      | 0.00<br>2091 | 0.02<br>3114 | Up   |
| PBK    | 145.82<br>76572 | 199.719865  | 91.9354494  | 0.4603<br>22009 | -<br>1.119284        | 0.00<br>8296 | 0.06<br>4807 | Down |

|         |                 |             |             |                 |                      |              |              |      |
|---------|-----------------|-------------|-------------|-----------------|----------------------|--------------|--------------|------|
|         |                 |             |             |                 | 673                  |              |              |      |
| PBX4    | 91.781<br>40892 | 36.80524958 | 146.7575683 | 3.9874<br>08588 | 1.995451<br>445      | 6.65<br>E-05 | 0.00<br>1496 | Up   |
| PCDH10  | 9.9270<br>53067 | 17.06439317 | 2.789712965 | 0.1634<br>81522 | -<br>2.612800<br>516 | 0.02<br>3737 | 0.13<br>7376 | Down |
| PCDH11X | 32.455<br>09248 | 63.81606298 | 1.094121987 | 0.0171<br>44931 | -<br>5.866074<br>105 | 0.01<br>548  | 0.10<br>1133 | Down |
| PCDH17  | 202.69<br>92645 | 369.7395333 | 35.65899572 | 0.0964<br>43557 | -<br>3.374171<br>33  | 9.21<br>E-09 | 6.36<br>E-07 | Down |
| PCDH18  | 1060.2<br>35171 | 1730.045187 | 390.4251541 | 0.2256<br>73385 | -<br>2.147691<br>81  | 0.00<br>9222 | 0.06<br>9789 | Down |
| PCDH19  | 79.627<br>70596 | 107.9336121 | 51.32179984 | 0.4754<br>94138 | -<br>1.072500<br>54  | 0.03<br>0428 | 0.16<br>2762 | Down |
| PCDH7   | 1377.9<br>05917 | 1937.543724 | 818.2681108 | 0.4223<br>22398 | -<br>1.243583<br>333 | 0.00<br>2376 | 0.02<br>5502 | Down |
| PCDHB11 | 90.778<br>85425 | 126.5485394 | 55.00916907 | 0.4346<br>88297 | -<br>1.201946<br>841 | 0.04<br>0428 | 0.19<br>7152 | Down |
| PCDHB15 | 80.420<br>16613 | 114.7508557 | 46.08947653 | 0.4016<br>48216 | -<br>1.315995<br>625 | 0.00<br>8454 | 0.06<br>556  | Down |
| PCLO    | 57.000<br>84453 | 6.427511293 | 107.5741778 | 16.736<br>52101 | 4.064927<br>763      | 4.72<br>E-10 | 4.33<br>E-08 | Up   |
| PCOLCE  | 13634.<br>61379 | 23950.15274 | 3319.074833 | 0.1385<br>82617 | -<br>2.851181<br>794 | 0.02<br>761  | 0.15<br>2403 | Down |
| PCOLCE2 | 1469.9<br>46759 | 2678.491597 | 261.4019217 | 0.0975<br>92959 | -<br>3.357079<br>118 | 1.56<br>E-19 | 7.08<br>E-17 | Down |
| PCP4L1  | 246.68<br>15797 | 430.2201685 | 63.14299087 | 0.1467<br>69016 | -<br>2.768380<br>656 | 0.02<br>7304 | 0.15<br>0901 | Down |
| PCSK6   | 943.78<br>26997 | 1427.408763 | 460.1566363 | 0.3223<br>72013 | -<br>1.633201<br>594 | 0.00<br>2428 | 0.02<br>5889 | Down |
| PDCD4   | 10055.<br>80934 | 6392.588687 | 13719.03    | 2.1460<br>8364  | 1.101706<br>304      | 0.00<br>4069 | 0.03<br>7867 | Up   |
| PDCL2   | 3.9853          | 0           | 7.970799848 | Inf             | Inf                  | 0.02         | 0.15         | Up   |



|        |                 |             |             |                 |                      |              |              |          |
|--------|-----------------|-------------|-------------|-----------------|----------------------|--------------|--------------|----------|
|        | 99924           |             |             |                 |                      | 7835         | 3134         |          |
| PDE10A | 340.77<br>67549 | 523.1184298 | 158.43508   | 0.3028<br>66561 | -<br>1.723245<br>792 | 0.00<br>1406 | 0.01<br>7231 | Dow<br>n |
| PDE11A | 12.538<br>77631 | 22.37393936 | 2.70361326  | 0.1208<br>37606 | -<br>3.048858<br>593 | 0.00<br>5135 | 0.04<br>5495 | Dow<br>n |
| PDE1A  | 372.54<br>47035 | 661.8257574 | 83.26364957 | 0.1258<br>09019 | -<br>2.990692<br>74  | 6.41<br>E-09 | 4.56<br>E-07 | Dow<br>n |
| PDE1B  | 228.28<br>06401 | 349.9452279 | 106.6160523 | 0.3046<br>6497  | -<br>1.714704<br>466 | 0.00<br>2427 | 0.02<br>5884 | Dow<br>n |
| PDE4B  | 1004.8<br>88946 | 1428.640724 | 581.1371684 | 0.4067<br>76286 | -<br>1.297692<br>517 | 0.02<br>6553 | 0.14<br>8058 | Dow<br>n |
| PDE5A  | 172.08<br>11064 | 295.1981802 | 48.96403258 | 0.1658<br>68342 | -<br>2.591889<br>542 | 0.01<br>2632 | 0.08<br>7263 | Dow<br>n |
| PDE7A  | 1078.9<br>95366 | 511.8589471 | 1646.131784 | 3.2159<br>87126 | 1.685261<br>631      | 2.67<br>E-06 | 9.53<br>E-05 | Up       |
| PDE7B  | 713.39<br>26018 | 979.8213638 | 446.9638397 | 0.4561<br>68702 | -<br>1.132360<br>629 | 0.00<br>1627 | 0.01<br>9081 | Dow<br>n |
| PDE8A  | 636.35<br>14548 | 869.5788226 | 403.1240871 | 0.4635<br>85447 | -<br>1.109092<br>818 | 0.00<br>249  | 0.02<br>6363 | Dow<br>n |
| PDGFD  | 592.22<br>9833  | 1012.273074 | 172.1865923 | 0.1700<br>98955 | -<br>2.555553<br>814 | 7.07<br>E-05 | 0.00<br>1571 | Dow<br>n |
| PDGFRA | 6036.6<br>27347 | 9988.131316 | 2085.123378 | 0.2087<br>60109 | -<br>2.260082<br>037 | 0.02<br>5545 | 0.14<br>4298 | Dow<br>n |
| PDGFRL | 1633.0<br>05757 | 2734.422111 | 531.5894026 | 0.1944<br>06489 | -<br>2.362851<br>719 | 0.02<br>9332 | 0.15<br>907  | Dow<br>n |
| PDK3   | 684.10<br>60356 | 964.2132576 | 403.9988135 | 0.4189<br>93216 | -<br>1.255001<br>21  | 0.00<br>9298 | 0.07<br>019  | Dow<br>n |
| PDLIM7 | 7952.1<br>90045 | 12148.59838 | 3755.781708 | 0.3091<br>535   | -<br>1.693604<br>757 | 0.00<br>5644 | 0.04<br>8633 | Dow<br>n |
| PDP1   | 1004.4<br>66843 | 1395.562282 | 613.3714032 | 0.4395<br>15607 | -<br>1.186013        | 0.03<br>0601 | 0.16<br>3449 | Dow<br>n |

|          |                 |             |             |                 |                      |              |              |          |
|----------|-----------------|-------------|-------------|-----------------|----------------------|--------------|--------------|----------|
|          |                 |             |             |                 | 7                    |              |              |          |
| PDPN     | 227.08<br>27438 | 322.5974408 | 131.5680468 | 0.4078<br>3971  | -<br>1.293925<br>841 | 0.00<br>1189 | 0.01<br>5096 | Dow<br>n |
| PDZD4    | 93.644<br>39788 | 60.13386846 | 127.1549273 | 2.1145<br>30972 | 1.080337<br>692      | 0.02<br>8191 | 0.15<br>4289 | Up       |
| PDZK1    | 251.87<br>55436 | 54.36323488 | 449.3878523 | 8.2663<br>9278  | 3.047257<br>915      | 1.21<br>E-12 | 1.80<br>E-10 | Up       |
| PDZK1IP1 | 113.04<br>76402 | 54.13279371 | 171.9624867 | 3.1766<br>78588 | 1.667519<br>127      | 0.00<br>0483 | 0.00<br>7539 | Up       |
| PEA15    | 7442.5<br>38807 | 10540.74172 | 4344.335894 | 0.4121<br>47077 | -<br>1.278768<br>83  | 0.00<br>4368 | 0.04<br>0135 | Dow<br>n |
| PEAK1    | 2751.3<br>77372 | 4117.716133 | 1385.03861  | 0.3363<br>60877 | -<br>1.571918<br>182 | 0.00<br>0395 | 0.00<br>6391 | Dow<br>n |
| PECAM1   | 8866.7<br>13588 | 12629.55839 | 5103.868786 | 0.4041<br>20922 | -<br>1.307141<br>049 | 0.00<br>01   | 0.00<br>2066 | Dow<br>n |
| PEG10    | 250.75<br>51895 | 374.4700438 | 127.0403351 | 0.3392<br>53666 | -<br>1.559563<br>69  | 8.65<br>E-05 | 0.00<br>1854 | Dow<br>n |
| PERP     | 1722.5<br>16976 | 434.5817544 | 3010.452198 | 6.9272<br>40196 | 2.792280<br>699      | 4.92<br>E-14 | 9.03<br>E-12 | Up       |
| PEX5L    | 28.312<br>84357 | 9.429751066 | 47.19593608 | 5.0050<br>03393 | 2.323371<br>047      | 0.00<br>1975 | 0.02<br>2076 | Up       |
| PGAM1    | 4730.3<br>41217 | 6603.6243   | 2857.058134 | 0.4326<br>50012 | -<br>1.208727<br>651 | 0.00<br>0411 | 0.00<br>6579 | Dow<br>n |
| PGBD5    | 78.879<br>35697 | 46.35006654 | 111.4086474 | 2.4036<br>35112 | 1.265217<br>902      | 0.01<br>5328 | 0.10<br>0537 | Up       |
| PGK1     | 5619.1<br>51477 | 7853.929189 | 3384.373764 | 0.4309<br>14729 | -<br>1.214525<br>685 | 0.00<br>0919 | 0.01<br>2403 | Dow<br>n |
| PGLYRP1  | 175.91<br>44409 | 107.2097918 | 244.6190899 | 2.2816<br>86083 | 1.190100<br>318      | 0.02<br>704  | 0.14<br>9896 | Up       |
| PGLYRP2  | 31.889<br>16223 | 15.15050413 | 48.62782033 | 3.2096<br>50314 | 1.682416<br>127      | 0.01<br>3964 | 0.09<br>4349 | Up       |
| PGM2L1   | 181.26<br>39383 | 244.7289165 | 117.7989601 | 0.4813<br>44672 | -<br>1.054857<br>773 | 0.01<br>1646 | 0.08<br>2269 | Dow<br>n |
| PGM3     | 690.12<br>18512 | 988.0387887 | 392.2049137 | 0.3969<br>52952 | -<br>1.332960<br>07  | 0.00<br>0232 | 0.00<br>413  | Dow<br>n |

|         |                 |             |             |                 |                      |              |              |          |
|---------|-----------------|-------------|-------------|-----------------|----------------------|--------------|--------------|----------|
| PHACTR2 | 225.32<br>09575 | 326.1708266 | 124.4710885 | 0.3816<br>13187 | -<br>1.389817<br>071 | 0.00<br>051  | 0.00<br>7838 | Dow<br>n |
| PHEX    | 3.5993<br>30132 | 7.198660263 | 0           | 0               | #NAME?               | 0.02<br>2653 | 0.13<br>2925 | Dow<br>n |
| PHLDB2  | 3695.3<br>51677 | 5325.943771 | 2064.759584 | 0.3876<br>79569 | -<br>1.367063<br>39  | 0.00<br>785  | 0.06<br>2071 | Dow<br>n |
| PHLPP1  | 843.76<br>68493 | 561.575395  | 1125.958304 | 2.0049<br>99353 | 1.003601<br>771      | 0.00<br>5424 | 0.04<br>7181 | Up       |
| PHTF2   | 482.69<br>08105 | 696.5277191 | 268.8539019 | 0.3859<br>91676 | -<br>1.373358<br>358 | 0.01<br>7404 | 0.11<br>0171 | Dow<br>n |
| PHYHIP  | 170.16<br>44286 | 72.77964416 | 267.5492131 | 3.6761<br>54454 | 1.878197<br>383      | 2.27<br>E-05 | 0.00<br>0603 | Up       |
| PHYHIPL | 4.8145<br>61043 | 9.629122085 | 0           | 0               | #NAME?               | 0.00<br>5683 | 0.04<br>8854 | Dow<br>n |
| PI16    | 25744.<br>7194  | 44935.24873 | 6554.190069 | 0.1458<br>58547 | -<br>2.777358<br>172 | 2.98<br>E-05 | 0.00<br>0755 | Dow<br>n |
| PIANP   | 8.4419<br>62909 | 1.637787989 | 15.24613783 | 9.3089<br>81339 | 3.218623<br>305      | 0.02<br>2802 | 0.13<br>3673 | Up       |
| PID1    | 698.80<br>7894  | 1003.632632 | 393.9831556 | 0.3925<br>5714  | -<br>1.349025<br>43  | 0.02<br>1459 | 0.12<br>8061 | Dow<br>n |
| PIEZO2  | 772.38<br>80324 | 1263.680745 | 281.0953202 | 0.2224<br>41721 | -<br>2.168500<br>687 | 0.03<br>698  | 0.18<br>6039 | Dow<br>n |
| PIGA    | 404.19<br>72746 | 573.0339801 | 235.3605691 | 0.4107<br>27072 | -<br>1.283748<br>051 | 0.00<br>6783 | 0.05<br>5596 | Dow<br>n |
| PIH1D2  | 40.200<br>70125 | 23.15430305 | 57.24709945 | 2.4724<br>173   | 1.305922<br>265      | 0.03<br>6777 | 0.18<br>5468 | Up       |
| PIK3AP1 | 2010.9<br>76232 | 679.2315898 | 3342.720873 | 4.9213<br>27164 | 2.299047<br>428      | 7.07<br>E-08 | 3.75<br>E-06 | Up       |
| PIK3C2G | 73.932<br>5154  | 37.1203556  | 110.7446752 | 2.9833<br>94781 | 1.576954<br>897      | 0.00<br>3309 | 0.03<br>2723 | Up       |
| PIK3IP1 | 919.27<br>8334  | 593.8831059 | 1244.673562 | 2.0958<br>22477 | 1.067516<br>521      | 0.00<br>274  | 0.02<br>8372 | Up       |
| PIK3R2  | 1641.8<br>91931 | 1069.133527 | 2214.650334 | 2.0714<br>44097 | 1.050636<br>886      | 0.00<br>2522 | 0.02<br>6622 | Up       |
| PIM1    | 874.26<br>15231 | 1326.749329 | 421.7737167 | 0.3179<br>00079 | -<br>1.653354<br>72  | 0.00<br>2615 | 0.02<br>7381 | Dow<br>n |

|         |                 |             |             |                 |                      |              |              |      |
|---------|-----------------|-------------|-------------|-----------------|----------------------|--------------|--------------|------|
| PIP5K1B | 607.52<br>56084 | 339.8048949 | 875.246322  | 2.5757<br>31943 | 1.364982<br>459      | 0.00<br>0432 | 0.00<br>6867 | Up   |
| PITPNC1 | 1285.7<br>85797 | 1802.058895 | 769.5126988 | 0.4270<br>18618 | -<br>1.227629<br>122 | 0.00<br>0538 | 0.00<br>8144 | Down |
| PITPNM3 | 119.56<br>8506  | 64.99299777 | 174.1440142 | 2.6794<br>27326 | 1.421924<br>686      | 0.00<br>1542 | 0.01<br>8368 | Up   |
| PITX2   | 8.3011<br>12041 | 15.82066251 | 0.781561572 | 0.0494<br>01318 | -<br>4.339306<br>671 | 0.03<br>3457 | 0.17<br>3994 | Down |
| PKD1    | 7652.2<br>25162 | 11309.29518 | 3995.155143 | 0.3532<br>62965 | -<br>1.501185<br>587 | 0.00<br>0302 | 0.00<br>5102 | Down |
| PKD2    | 2394.3<br>58922 | 3328.157621 | 1460.560224 | 0.4388<br>49475 | -<br>1.188201<br>914 | 0.02<br>8685 | 0.15<br>6389 | Down |
| PKHD1L1 | 376.06<br>61043 | 661.0773677 | 91.05484081 | 0.1377<br>37041 | -<br>2.860011<br>501 | 0.03<br>1915 | 0.16<br>8485 | Down |
| PKIG    | 740.26<br>93943 | 1106.718033 | 373.8207559 | 0.3377<br>74162 | -<br>1.565869<br>122 | 2.03<br>E-05 | 0.00<br>0547 | Down |
| PKLR    | 48.898<br>40316 | 71.88901685 | 25.90778947 | 0.3603<br>8592  | -<br>1.472385<br>448 | 0.02<br>9817 | 0.16<br>0681 | Down |
| PKNOX2  | 587.23<br>59476 | 1082.421342 | 92.0505532  | 0.0850<br>41332 | -<br>3.555691<br>988 | 0.02<br>2831 | 0.13<br>3673 | Down |
| PKP1    | 819.65<br>56632 | 299.3452205 | 1339.966106 | 4.4763<br>23703 | 2.162314<br>368      | 9.69<br>E-09 | 6.59<br>E-07 | Up   |
| PKP2    | 306.67<br>96742 | 130.0441282 | 483.3152202 | 3.7165<br>47812 | 1.893963<br>168      | 2.57<br>E-06 | 9.28<br>E-05 | Up   |
| PKP3    | 576.35<br>0676  | 205.8174454 | 946.8839066 | 4.6006<br>00814 | 2.201822<br>282      | 7.07<br>E-08 | 3.75<br>E-06 | Up   |
| PLA1A   | 69.307<br>50663 | 100.5124163 | 38.10259694 | 0.3790<br>83484 | -<br>1.399412<br>493 | 0.00<br>7939 | 0.06<br>2664 | Down |
| PLA2G2F | 5.7102<br>86829 | 0.391806901 | 11.02876676 | 28.148<br>47501 | 4.814984<br>859      | 0.02<br>8225 | 0.15<br>4296 | Up   |
| PLA2R1  | 430.48<br>69053 | 589.7560119 | 271.2177988 | 0.4598<br>81363 | -<br>1.120666<br>361 | 0.00<br>264  | 0.02<br>7548 | Down |
| PLAC8   | 307.54<br>80001 | 174.6054191 | 440.4905811 | 2.5227<br>77262 | 1.335012<br>835      | 0.04<br>4306 | 0.20<br>9908 | Up   |

|         |                 |             |             |                 |                      |              |              |          |
|---------|-----------------|-------------|-------------|-----------------|----------------------|--------------|--------------|----------|
| PLAC9   | 1159.0<br>37    | 1967.903435 | 350.1705652 | 0.1779<br>40929 | -<br>2.490529<br>706 | 0.00<br>0107 | 0.00<br>217  | Dow<br>n |
| PLAU    | 1620.4<br>86191 | 2469.834005 | 771.1383773 | 0.3122<br>22755 | -<br>1.679352<br>409 | 4.31<br>E-05 | 0.00<br>1028 | Dow<br>n |
| PLAUR   | 577.62<br>55139 | 801.4776968 | 353.773331  | 0.4414<br>01342 | -<br>1.179837<br>079 | 0.01<br>7863 | 0.11<br>2374 | Dow<br>n |
| PLB1    | 239.52<br>94187 | 78.24679155 | 400.8120458 | 5.1224<br>087   | 2.356822<br>365      | 1.88<br>E-08 | 1.18<br>E-06 | Up       |
| PLCB2   | 308.86<br>6899  | 195.743437  | 421.990361  | 2.1558<br>34021 | 1.108246<br>108      | 0.00<br>3402 | 0.03<br>3354 | Up       |
| PLCB4   | 1292.5<br>11814 | 1975.306306 | 609.7173212 | 0.3086<br>69759 | -<br>1.695863<br>95  | 0.01<br>9207 | 0.11<br>8163 | Dow<br>n |
| PLCE1   | 464.65<br>50319 | 639.326596  | 289.9834678 | 0.4535<br>76419 | -<br>1.140582<br>458 | 0.00<br>2066 | 0.02<br>288  | Dow<br>n |
| PLCG2   | 868.44<br>32023 | 481.6640703 | 1255.222334 | 2.6060<br>11974 | 1.381843<br>712      | 0.00<br>1482 | 0.01<br>7895 | Up       |
| PLCH1   | 72.034<br>24862 | 26.15882241 | 117.9096748 | 4.5074<br>53469 | 2.172312<br>599      | 6.13<br>E-05 | 0.00<br>14   | Up       |
| PLCH2   | 701.58<br>11019 | 234.3620694 | 1168.800134 | 4.9871<br>55718 | 2.318217<br>25       | 1.23<br>E-09 | 1.07<br>E-07 | Up       |
| PLCL1   | 239.26<br>01739 | 378.8317581 | 99.68858958 | 0.2631<br>47393 | -<br>1.926056<br>992 | 2.94<br>E-05 | 0.00<br>075  | Dow<br>n |
| PLCXD1  | 113.61<br>07563 | 35.13946567 | 192.0820469 | 5.4662<br>76828 | 2.450558<br>524      | 6.81<br>E-07 | 2.85<br>E-05 | Up       |
| PLCXD3  | 9.0628<br>57483 | 16.80513227 | 1.320582696 | 0.0785<br>82107 | -<br>3.669655<br>346 | 0.02<br>2241 | 0.13<br>1056 | Dow<br>n |
| PLD1    | 1356.2<br>86343 | 2105.58841  | 606.9842752 | 0.2882<br>72994 | -<br>1.794492<br>406 | 0.02<br>3349 | 0.13<br>5667 | Dow<br>n |
| PLD4    | 469.75<br>3898  | 272.1105512 | 667.3972449 | 2.4526<br>69483 | 1.294352<br>832      | 0.00<br>0373 | 0.00<br>61   | Up       |
| PLEK2   | 123.42<br>52373 | 38.36697665 | 208.483498  | 5.4339<br>30849 | 2.441996<br>206      | 3.82<br>E-07 | 1.72<br>E-05 | Up       |
| PLEKHA3 | 537.15<br>74345 | 717.2002284 | 357.1146407 | 0.4979<br>28788 | -<br>1.005988<br>666 | 0.01<br>0117 | 0.07<br>4426 | Dow<br>n |
| PLEKHA7 | 1053.5          | 623.1220356 | 1483.924433 | 2.3814          | 1.251830             | 0.00         | 0.00         | Up       |

|         |                 |             |             |                 |                      |              |              |      |
|---------|-----------------|-------------|-------------|-----------------|----------------------|--------------|--------------|------|
|         | 23234           |             |             | 34693           | 985                  | 0468         | 7354         |      |
| PLEKHG6 | 138.50<br>02753 | 42.91427921 | 234.0862715 | 5.4547<br>40842 | 2.447510<br>655      | 1.53<br>E-07 | 7.49<br>E-06 | Up   |
| PLEKHN1 | 249.54<br>04634 | 147.7009792 | 351.3799476 | 2.3789<br>95383 | 1.250352<br>472      | 0.00<br>5909 | 0.05<br>0418 | Up   |
| PLEKHS1 | 366.97<br>18585 | 97.49439437 | 636.4493226 | 6.5280<br>60682 | 2.706654<br>468      | 0.00<br>0331 | 0.00<br>5538 | Up   |
| PLIN1   | 841.98<br>03389 | 1591.005087 | 92.955591   | 0.0584<br>25703 | -<br>4.097252<br>997 | 0.03<br>9288 | 0.19<br>3574 | Down |
| PLIN4   | 2471.1<br>07301 | 4580.974874 | 361.2397287 | 0.0788<br>56518 | -<br>3.664626<br>178 | 0.00<br>0397 | 0.00<br>6407 | Down |
| PLK3    | 323.88<br>15495 | 452.0678261 | 195.6952729 | 0.4328<br>89185 | -<br>1.207930<br>337 | 0.00<br>5191 | 0.04<br>575  | Down |
| PLK5    | 133.36<br>49499 | 56.77721628 | 209.9526836 | 3.6978<br>33345 | 1.886680<br>207      | 4.76<br>E-05 | 0.00<br>112  | Up   |
| PLLP    | 357.87<br>63914 | 70.00124099 | 645.7515418 | 9.2248<br>58483 | 3.205526<br>779      | 1.00<br>E-14 | 2.16<br>E-12 | Up   |
| PLOD1   | 3914.7<br>01157 | 5744.040081 | 2085.362232 | 0.3630<br>47995 | -<br>1.461767<br>811 | 0.00<br>0127 | 0.00<br>2498 | Down |
| PLOD2   | 2773.6<br>24809 | 4810.67191  | 736.5777068 | 0.1531<br>1327  | -<br>2.707328<br>772 | 3.87<br>E-05 | 0.00<br>0941 | Down |
| PLOD3   | 2009.8<br>99038 | 2736.89906  | 1282.899016 | 0.4687<br>41809 | -<br>1.093134<br>615 | 0.00<br>1607 | 0.01<br>895  | Down |
| PLS1    | 14.912<br>43044 | 5.353721131 | 24.47113975 | 4.5708<br>65601 | 2.192467<br>399      | 0.02<br>595  | 0.14<br>5902 | Up   |
| PLSCR4  | 1529.2<br>49448 | 2638.20284  | 420.2960559 | 0.1593<br>11502 | -<br>2.650077<br>668 | 0.01<br>8497 | 0.11<br>5239 | Down |
| PLVAP   | 3157.0<br>83403 | 4707.14738  | 1607.019426 | 0.3413<br>99853 | -<br>1.550465<br>656 | 0.01<br>438  | 0.09<br>6272 | Down |
| PLXDC2  | 2526.7<br>62643 | 3780.571689 | 1272.953598 | 0.3367<br>09287 | -<br>1.570424<br>581 | 0.00<br>0294 | 0.00<br>4996 | Down |
| PLXNA4  | 783.56<br>99058 | 1355.046941 | 212.0928711 | 0.1565<br>20682 | -<br>2.675574<br>795 | 0.01<br>0756 | 0.07<br>8014 | Down |
| PLXNB1  | 2147.4          | 940.8966545 | 3353.976958 | 3.5646          | 1.833764             | 1.86         | 8.98         | Up   |

|          |                 |             |             |                 |                      |              |              |          |
|----------|-----------------|-------------|-------------|-----------------|----------------------|--------------|--------------|----------|
|          | 36806           |             |             | 60308           | 603                  | E-07         | E-06         |          |
| PMEPA1   | 4130.3<br>02798 | 6148.075911 | 2112.529685 | 0.3436<br>08263 | -<br>1.541163<br>364 | 0.00<br>4247 | 0.03<br>9276 | Dow<br>n |
| PML      | 1452.9<br>59669 | 957.9227498 | 1947.996588 | 2.0335<br>63341 | 1.024009<br>929      | 0.00<br>3181 | 0.03<br>1802 | Up       |
| PMP22    | 3328.8<br>72784 | 5626.896292 | 1030.849277 | 0.1832<br>00333 | -<br>2.448505<br>966 | 0.00<br>0135 | 0.00<br>2643 | Dow<br>n |
| PNMT     | 192.39<br>80637 | 6.577052142 | 378.2190752 | 57.505<br>86539 | 5.845637<br>208      | 2.86<br>E-27 | 5.19<br>E-24 | Up       |
| PNP      | 5116.3<br>70643 | 6997.79365  | 3234.947635 | 0.4622<br>81084 | -<br>1.113157<br>764 | 0.00<br>1146 | 0.01<br>4698 | Dow<br>n |
| POF1B    | 23.267<br>99669 | 2.438881899 | 44.09711148 | 18.080<br>87202 | 4.176392<br>354      | 9.95<br>E-05 | 0.00<br>2064 | Up       |
| POPDC2   | 27.266<br>36437 | 44.21331142 | 10.31941731 | 0.2334<br>00688 | -<br>2.099119<br>28  | 0.00<br>7811 | 0.06<br>187  | Dow<br>n |
| POR      | 3717.9<br>67074 | 2469.759668 | 4966.17448  | 2.0107<br>92607 | 1.007764<br>29       | 0.00<br>3774 | 0.03<br>5911 | Up       |
| PORCN    | 1864.3<br>32285 | 495.4569623 | 3233.207607 | 6.5257<br>08292 | 2.706134<br>498      | 5.71<br>E-07 | 2.47<br>E-05 | Up       |
| POU2AF1  | 118.40<br>27581 | 69.89678729 | 166.9087289 | 2.3879<br>31339 | 1.255761<br>355      | 0.01<br>0419 | 0.07<br>621  | Up       |
| PPA1     | 1041.6<br>23957 | 1459.445325 | 623.8025878 | 0.4274<br>24431 | -<br>1.226258<br>722 | 0.03<br>7506 | 0.18<br>7409 | Dow<br>n |
| PPAP2A   | 2251.6<br>17221 | 3388.634991 | 1114.599451 | 0.3289<br>22842 | -<br>1.604178<br>896 | 0.00<br>1502 | 0.01<br>8079 | Dow<br>n |
| PPAP2C   | 1002.1<br>84669 | 659.9599032 | 1344.409434 | 2.0371<br>07751 | 1.026522<br>292      | 0.00<br>3598 | 0.03<br>4727 | Up       |
| PPAPDC1A | 16.763<br>00608 | 4.623187608 | 28.90282454 | 6.2517<br>0921  | 2.644250<br>675      | 0.00<br>524  | 0.04<br>605  | Up       |
| PPARGC1A | 83.206<br>13363 | 132.9859849 | 33.42628238 | 0.2513<br>51918 | -<br>1.992219<br>397 | 0.00<br>0943 | 0.01<br>2658 | Dow<br>n |
| PPEF1    | 27.655<br>67472 | 44.0118155  | 11.29953394 | 0.2567<br>38646 | -<br>1.961627<br>617 | 0.01<br>4264 | 0.09<br>5789 | Dow<br>n |
| PPFIA3   | 372.89<br>63212 | 222.9387426 | 522.8538999 | 2.3452<br>80564 | 1.229760<br>521      | 0.00<br>1423 | 0.01<br>7375 | Up       |
| PPIC     | 1867.7          | 2959.85961  | 775.7058728 | 0.2620          | -                    | 0.00         | 0.00         | Dow      |

|          |                 |             |             |                 |                      |              |              |          |
|----------|-----------------|-------------|-------------|-----------------|----------------------|--------------|--------------|----------|
|          | 82742           |             |             | 75225           | 1.931947<br>119      | 041          | 6576         | n        |
| PPIL6    | 40.354<br>83955 | 13.57762129 | 67.13205781 | 4.9443<br>1656  | 2.305771<br>115      | 0.00<br>0421 | 0.00<br>6697 | Up       |
| PPIP5K1  | 754.11<br>74762 | 389.4075948 | 1118.827358 | 2.8731<br>52379 | 1.522634<br>509      | 2.95<br>E-05 | 0.00<br>075  | Up       |
| PPM1H    | 194.01<br>56984 | 127.025195  | 261.0062018 | 2.0547<br>59308 | 1.038969<br>408      | 0.01<br>2546 | 0.08<br>6868 | Up       |
| PPM1J    | 73.325<br>47112 | 36.69018369 | 109.9607586 | 2.9970<br>07578 | 1.583522<br>732      | 0.00<br>283  | 0.02<br>913  | Up       |
| PPP1R12A | 1487.4<br>75057 | 2382.99004  | 591.9600738 | 0.2484<br>10637 | -<br>2.009201<br>144 | 0.01<br>9517 | 0.11<br>9343 | Dow<br>n |
| PPP1R14C | 181.84<br>68073 | 86.03442965 | 277.659185  | 3.2273<br>0314  | 1.690329<br>096      | 0.00<br>0213 | 0.00<br>3895 | Up       |
| PPP1R14D | 237.45<br>05543 | 76.85129877 | 398.0498099 | 5.1794<br>80584 | 2.372807<br>427      | 2.32<br>E-08 | 1.40<br>E-06 | Up       |
| PPP1R15A | 1479.7<br>37829 | 2201.577199 | 757.8984597 | 0.3442<br>52502 | -<br>1.538460<br>954 | 0.04<br>8181 | 0.22<br>3289 | Dow<br>n |
| PPP1R2   | 679.56<br>78245 | 1020.693894 | 338.4417554 | 0.3315<br>80073 | -<br>1.592570<br>789 | 0.00<br>0609 | 0.00<br>8941 | Dow<br>n |
| PPP1R3C  | 1049.7<br>38524 | 1604.654941 | 494.8221071 | 0.3083<br>66674 | -<br>1.697281<br>237 | 0.01<br>0875 | 0.07<br>8534 | Dow<br>n |
| PPP1R3G  | 120.80<br>04288 | 185.3657409 | 56.23511674 | 0.3033<br>73841 | -<br>1.720831<br>404 | 0.00<br>015  | 0.00<br>2893 | Dow<br>n |
| PPP2R2C  | 455.87<br>96014 | 869.9880479 | 41.77115496 | 0.0480<br>13481 | -<br>4.380416<br>642 | 0.00<br>4764 | 0.04<br>2913 | Dow<br>n |
| PPP4R4   | 71.897<br>39343 | 21.51587511 | 122.2789118 | 5.6831<br>94902 | 2.506702<br>193      | 3.72<br>E-06 | 0.00<br>0127 | Up       |
| PPTC7    | 123.12<br>19215 | 189.2801417 | 56.96370131 | 0.3009<br>49169 | -<br>1.732408<br>263 | 0.03<br>0117 | 0.16<br>1767 | Dow<br>n |
| PQLC3    | 311.07<br>2347  | 427.7008917 | 194.4438023 | 0.4546<br>25665 | -<br>1.137248<br>964 | 0.00<br>8701 | 0.06<br>6966 | Dow<br>n |
| PRADC1   | 342.07<br>16717 | 460.2063791 | 223.9369642 | 0.4866<br>01174 | -<br>1.039188<br>295 | 0.00<br>591  | 0.05<br>0418 | Dow<br>n |
| PRAF2    | 1011.8          | 1402.53706  | 621.2423202 | 0.4429          | -                    | 0.00         | 0.02         | Dow      |



|          |                 |             |             |                 |                      |              |              |          |
|----------|-----------------|-------------|-------------|-----------------|----------------------|--------------|--------------|----------|
|          | 8969            |             |             | 41822           | 1.174810<br>875      | 2585         | 7175         | n        |
| PRAM1    | 57.344<br>7752  | 35.96238585 | 78.72716455 | 2.1891<br>52991 | 1.130372<br>782      | 0.03<br>6642 | 0.18<br>4991 | Up       |
| PRDM6    | 82.675<br>60713 | 134.4378833 | 30.913331   | 0.2299<br>45089 | -<br>2.120638<br>71  | 0.02<br>6629 | 0.14<br>8343 | Dow<br>n |
| PRDM8    | 262.26<br>21927 | 441.8976826 | 82.62670283 | 0.1869<br>81526 | -<br>2.419032<br>361 | 0.00<br>0751 | 0.01<br>0606 | Dow<br>n |
| PRELP    | 7570.4<br>14475 | 11383.50052 | 3757.328425 | 0.3300<br>67927 | -<br>1.599165<br>136 | 0.01<br>8691 | 0.11<br>6032 | Dow<br>n |
| PREX2    | 324.53<br>87172 | 446.125524  | 202.9519103 | 0.4549<br>21091 | -<br>1.136311<br>771 | 0.00<br>322  | 0.03<br>2084 | Dow<br>n |
| PRF1     | 199.24<br>08967 | 93.08523474 | 305.3965587 | 3.2808<br>27078 | 1.714059<br>556      | 3.30<br>E-05 | 0.00<br>0824 | Up       |
| PRG4     | 5854.9<br>70186 | 11525.54522 | 184.3951537 | 0.0159<br>98823 | -<br>5.965890<br>45  | 9.90<br>E-08 | 5.06<br>E-06 | Dow<br>n |
| PRICKLE2 | 710.84<br>02368 | 1105.198801 | 316.481673  | 0.2863<br>57235 | -<br>1.804112<br>039 | 0.00<br>9417 | 0.07<br>0907 | Dow<br>n |
| PRKAR2A  | 581.33<br>3157  | 820.6779743 | 341.9883397 | 0.4167<br>14412 | -<br>1.262869<br>098 | 0.00<br>0543 | 0.00<br>8221 | Dow<br>n |
| PRKCDBP  | 4137.0<br>94873 | 6689.034688 | 1585.155058 | 0.2369<br>78149 | -<br>2.077174<br>057 | 0.00<br>0118 | 0.00<br>236  | Dow<br>n |
| PRKCZ    | 647.91<br>08878 | 415.3173416 | 880.5044339 | 2.1200<br>76255 | 1.084116<br>156      | 0.00<br>3136 | 0.03<br>1538 | Up       |
| PRKRA    | 356.08<br>0336  | 519.800444  | 192.360228  | 0.3700<br>65532 | -<br>1.434147<br>325 | 0.01<br>1974 | 0.08<br>4274 | Dow<br>n |
| PROC     | 24.749<br>79588 | 4.231380707 | 45.26821105 | 10.698<br>21276 | 3.419297<br>895      | 0.00<br>3891 | 0.03<br>6674 | Up       |
| PROCR    | 852.25<br>20782 | 1543.042464 | 161.4616925 | 0.1046<br>38528 | -<br>3.256513<br>94  | 3.47<br>E-08 | 1.99<br>E-06 | Dow<br>n |
| PROKR1   | 63.092<br>02987 | 29.35137317 | 96.83268657 | 3.2990<br>85395 | 1.722066<br>122      | 0.00<br>1917 | 0.02<br>1594 | Up       |
| PROM2    | 737.81<br>0678  | 120.2060898 | 1355.415266 | 11.275<br>76205 | 3.495153<br>034      | 9.33<br>E-19 | 3.85<br>E-16 | Up       |

|         |                 |             |             |                 |                      |              |              |          |
|---------|-----------------|-------------|-------------|-----------------|----------------------|--------------|--------------|----------|
| PROS1   | 2991.3<br>70151 | 4923.327323 | 1059.412979 | 0.2151<br>82317 | -<br>2.216368<br>57  | 0.00<br>1142 | 0.01<br>4679 | Dow<br>n |
| PROSER2 | 211.32<br>05129 | 135.0752646 | 287.5657612 | 2.1289<br>29837 | 1.090128<br>404      | 0.00<br>7593 | 0.06<br>0779 | Up       |
| PROX1   | 636.22<br>47225 | 1099.391231 | 173.058214  | 0.1574<br>12765 | -<br>2.667375<br>553 | 5.39<br>E-11 | 5.79<br>E-09 | Dow<br>n |
| PRR15L  | 788.11<br>94686 | 138.8712362 | 1437.367701 | 10.350<br>36297 | 3.371609<br>456      | 6.35<br>E-18 | 2.18<br>E-15 | Up       |
| PRR16   | 195.99<br>22347 | 277.0094712 | 114.9749983 | 0.4150<br>58004 | -<br>1.268615<br>128 | 0.03<br>2058 | 0.16<br>8945 | Dow<br>n |
| PRR36   | 297.99<br>32881 | 97.85138778 | 498.1351885 | 5.0907<br>31974 | 2.347873<br>11       | 6.27<br>E-09 | 4.50<br>E-07 | Up       |
| PRRC1   | 1750.7<br>60282 | 2446.357254 | 1055.163311 | 0.4313<br>20204 | -<br>1.213168<br>797 | 0.00<br>0456 | 0.00<br>7181 | Dow<br>n |
| PRRG2   | 206.80<br>62781 | 115.4049978 | 298.2075585 | 2.5840<br>09049 | 1.369611<br>122      | 0.00<br>0996 | 0.01<br>3191 | Up       |
| PRRT4   | 59.921<br>29407 | 32.05890657 | 87.78368157 | 2.7381<br>99488 | 1.453227<br>556      | 0.00<br>8446 | 0.06<br>5559 | Up       |
| PRRX1   | 1056.2<br>76786 | 1820.288057 | 292.2655141 | 0.1605<br>60035 | -<br>2.638815<br>259 | 0.00<br>1516 | 0.01<br>8144 | Dow<br>n |
| PRRX2   | 1287.8<br>56297 | 2045.346058 | 530.3665352 | 0.2593<br>04059 | -<br>1.947283<br>305 | 0.00<br>0846 | 0.01<br>1625 | Dow<br>n |
| PRSS22  | 339.90<br>97234 | 15.08675334 | 664.7326934 | 44.060<br>68545 | 5.461420<br>034      | 2.61<br>E-30 | 6.78<br>E-27 | Up       |
| PRSS23  | 4558.1<br>72371 | 7323.438516 | 1792.906225 | 0.2448<br>17543 | -<br>2.030221<br>152 | 0.00<br>8853 | 0.06<br>7902 | Dow<br>n |
| PRSS48  | 21.522<br>76563 | 42.76419478 | 0.28133648  | 0.0065<br>78786 | -<br>7.247962<br>93  | 0.01<br>0098 | 0.07<br>437  | Dow<br>n |
| PRSS8   | 2392.0<br>9668  | 1159.800593 | 3624.392768 | 3.1250<br>13721 | 1.643862<br>524      | 0.00<br>1435 | 0.01<br>7488 | Up       |
| PRUNE2  | 4637.2<br>55601 | 8123.057577 | 1151.453625 | 0.1417<br>51257 | -<br>2.818566<br>563 | 0.03<br>658  | 0.18<br>4834 | Dow<br>n |
| PRX     | 149.29<br>92819 | 77.42757758 | 221.1709861 | 2.8564<br>88515 | 1.514242<br>729      | 0.00<br>0632 | 0.00<br>9175 | Up       |
| PSD     | 160.87          | 60.5664455  | 261.1836183 | 4.3123          | 2.108473             | 1.83         | 6.89         | Up       |

|        |                 |             |             |                 |                      |              |              |          |
|--------|-----------------|-------------|-------------|-----------------|----------------------|--------------|--------------|----------|
|        | 50319           |             |             | 48465           | 762                  | E-06         | E-05         |          |
| PSD3   | 1110.2<br>36448 | 1540.677975 | 679.7949213 | 0.4412<br>31024 | -<br>1.180393<br>86  | 0.00<br>0892 | 0.01<br>207  | Dow<br>n |
| PSD4   | 759.08<br>78858 | 426.8323737 | 1091.343398 | 2.5568<br>43073 | 1.354363<br>617      | 0.00<br>0162 | 0.00<br>309  | Up       |
| PSRC1  | 235.85<br>02077 | 154.5858637 | 317.1145517 | 2.0513<br>81311 | 1.036595<br>685      | 0.01<br>1625 | 0.08<br>2228 | Up       |
| PTGDR  | 162.33<br>97324 | 238.3000829 | 86.3793819  | 0.3624<br>81544 | -<br>1.464020<br>555 | 0.00<br>0544 | 0.00<br>8227 | Dow<br>n |
| PTGDS  | 7726.7<br>88163 | 4101.663657 | 11351.91267 | 2.7676<br>36164 | 1.468654<br>297      | 0.00<br>1418 | 0.01<br>7341 | Up       |
| PTGER2 | 27.228<br>98246 | 13.07123376 | 41.38673116 | 3.1662<br>45201 | 1.662772<br>985      | 0.02<br>4989 | 0.14<br>2215 | Up       |
| PTGER3 | 235.08<br>21739 | 425.6326421 | 44.53170565 | 0.1046<br>24743 | -<br>3.256704<br>02  | 0.00<br>1093 | 0.01<br>4182 | Dow<br>n |
| PTGFRN | 5701.4<br>49368 | 8983.53724  | 2419.361495 | 0.2693<br>10566 | -<br>1.892657<br>264 | 0.03<br>9057 | 0.19<br>2738 | Dow<br>n |
| PTGIR  | 150.33<br>0273  | 242.5595099 | 58.10103604 | 0.2395<br>33119 | -<br>2.061702<br>949 | 2.36<br>E-06 | 8.58<br>E-05 | Dow<br>n |
| PTGIS  | 2162.7<br>13888 | 3767.610851 | 557.8169253 | 0.1480<br>55876 | -<br>2.755786<br>345 | 0.00<br>6874 | 0.05<br>6141 | Dow<br>n |
| PTGS2  | 442.22<br>30755 | 819.8928108 | 64.55334029 | 0.0787<br>33878 | -<br>3.666871<br>656 | 0.02<br>7289 | 0.15<br>0862 | Dow<br>n |
| PTHLH  | 180.58<br>48994 | 316.1845573 | 44.98524154 | 0.1422<br>75265 | -<br>2.813243<br>233 | 0.00<br>0178 | 0.00<br>336  | Dow<br>n |
| PTK7   | 1646.3<br>23214 | 836.5014467 | 2456.144981 | 2.9362<br>11277 | 1.553955<br>782      | 1.14<br>E-05 | 0.00<br>0333 | Up       |
| PTPDC1 | 162.90<br>85612 | 251.1320294 | 74.68509293 | 0.2973<br>93738 | -<br>1.749553<br>825 | 0.01<br>5585 | 0.10<br>1558 | Dow<br>n |
| PTPLA  | 282.57<br>45577 | 430.5205884 | 134.6285269 | 0.3127<br>11007 | -<br>1.677098<br>092 | 0.03<br>6022 | 0.18<br>2625 | Dow<br>n |
| PTPN11 | 1333.4<br>22709 | 1979.870706 | 686.9747117 | 0.3469<br>79583 | -<br>1.527077<br>321 | 1.90<br>E-05 | 0.00<br>0514 | Dow<br>n |

|        |                 |             |             |                 |                      |              |              |      |
|--------|-----------------|-------------|-------------|-----------------|----------------------|--------------|--------------|------|
| PTPN22 | 57.015<br>812   | 27.73170525 | 86.29991875 | 3.1119<br>58604 | 1.637822<br>869      | 0.00<br>3869 | 0.03<br>6527 | Up   |
| PTPN6  | 1038.0<br>77569 | 647.1775324 | 1428.977605 | 2.2080<br>14854 | 1.142749<br>877      | 0.00<br>1041 | 0.01<br>3685 | Up   |
| PTPN7  | 180.30<br>72373 | 87.40236143 | 273.2121132 | 3.1259<br>12261 | 1.644277<br>285      | 0.00<br>0103 | 0.00<br>2107 | Up   |
| PTPRB  | 1944.2<br>747   | 2715.714803 | 1172.834597 | 0.4318<br>69575 | -<br>1.211332<br>412 | 0.00<br>0376 | 0.00<br>6154 | Down |
| PTPRC  | 1803.3<br>28261 | 1200.67544  | 2405.981081 | 2.0038<br>5633  | 1.002779<br>076      | 0.02<br>4547 | 0.14<br>0432 | Up   |
| PTPRG  | 655.57<br>91641 | 912.3315593 | 398.8267689 | 0.4371<br>51126 | -<br>1.193795<br>978 | 0.00<br>0868 | 0.01<br>1816 | Down |
| PTPRK  | 1974.1<br>10308 | 1166.35207  | 2781.868547 | 2.3851<br>01908 | 1.254050<br>91       | 0.00<br>0404 | 0.00<br>6494 | Up   |
| PTPRM  | 1985.1<br>85222 | 2862.137122 | 1108.233322 | 0.3872<br>04831 | -<br>1.368831<br>141 | 6.87<br>E-05 | 0.00<br>1534 | Down |
| PTPRO  | 50.966<br>16945 | 25.03371714 | 76.89862177 | 3.0718<br>01975 | 1.619085<br>215      | 0.03<br>3548 | 0.17<br>4215 | Up   |
| PTPRQ  | 161.56<br>60567 | 318.4321746 | 4.699938734 | 0.0147<br>59623 | -<br>6.082200<br>353 | 0.00<br>1836 | 0.02<br>0936 | Down |
| PTPRR  | 32.773<br>70048 | 58.46398148 | 7.083419482 | 0.1211<br>58691 | -<br>3.045030<br>195 | 0.02<br>0027 | 0.12<br>1481 | Down |
| PTPRS  | 3069.1<br>57433 | 4529.024658 | 1609.290209 | 0.3553<br>28206 | -<br>1.492775<br>878 | 0.00<br>0124 | 0.00<br>2459 | Down |
| PTPRZ1 | 297.13<br>11925 | 96.41963369 | 497.8427512 | 5.1632<br>9229  | 2.368291<br>27       | 1.92<br>E-08 | 1.19<br>E-06 | Up   |
| PTRF   | 24340.<br>2311  | 33414.12439 | 15266.33782 | 0.4568<br>82773 | -<br>1.130104<br>048 | 0.00<br>0832 | 0.01<br>1483 | Down |
| PTX3   | 1367.2<br>83707 | 2619.169782 | 115.3976313 | 0.0440<br>58859 | -<br>4.504424<br>066 | 0.02<br>5533 | 0.14<br>4298 | Down |
| PVRIG  | 134.04<br>84325 | 68.45289894 | 199.6439661 | 2.9165<br>1587  | 1.544245<br>924      | 0.00<br>059  | 0.00<br>875  | Up   |
| PVRL1  | 333.64<br>76355 | 196.6411081 | 470.6541629 | 2.3934<br>67812 | 1.259102<br>404      | 0.00<br>1471 | 0.01<br>785  | Up   |
| PVRL3  | 185.55<br>9387  | 314.4971442 | 56.62162987 | 0.1800<br>38614 | -<br>2.473621        | 0.00<br>0227 | 0.00<br>407  | Down |

|           |                 |             |             |                 |                      |              |              |      |
|-----------|-----------------|-------------|-------------|-----------------|----------------------|--------------|--------------|------|
|           |                 |             |             |                 | 733                  |              |              |      |
| PVRL4     | 946.38<br>75921 | 303.6072073 | 1589.167977 | 5.2342<br>89368 | 2.387993<br>683      | 1.81<br>E-10 | 1.83<br>E-08 | Up   |
| PXDN      | 5777.0<br>12748 | 8042.793838 | 3511.231658 | 0.4365<br>68651 | -<br>1.195719<br>557 | 0.00<br>0369 | 0.00<br>6055 | Down |
| PYCARD    | 213.02<br>14751 | 140.6644422 | 285.3785081 | 2.0287<br>89249 | 1.020619<br>006      | 0.01<br>1175 | 0.07<br>9908 | Up   |
| PYCR1     | 1536.6<br>91576 | 2538.558176 | 534.824975  | 0.2106<br>80606 | -<br>2.246870<br>58  | 2.79<br>E-10 | 2.71<br>E-08 | Down |
| PYGB      | 3104.7<br>59103 | 1895.454827 | 4314.063379 | 2.2760<br>04322 | 1.186503<br>297      | 0.00<br>0471 | 0.00<br>7386 | Up   |
| PYGL      | 8556.4<br>10907 | 5626.132885 | 11486.68893 | 2.0416<br>66836 | 1.029747<br>463      | 0.00<br>2342 | 0.02<br>5215 | Up   |
| PYROXD2   | 317.81<br>39568 | 132.3758711 | 503.2520425 | 3.8016<br>9013  | 1.926640<br>945      | 0.00<br>2524 | 0.02<br>6622 | Up   |
| QKI       | 631.86<br>9074  | 856.2957441 | 407.4424039 | 0.4758<br>19723 | -<br>1.071513<br>021 | 0.00<br>3291 | 0.03<br>2576 | Down |
| QPCT      | 732.77<br>7771  | 1354.426411 | 111.1291314 | 0.0820<br>48851 | -<br>3.607373<br>051 | 0.03<br>3476 | 0.17<br>3994 | Down |
| RAB11FIP4 | 115.04<br>17428 | 44.13436011 | 185.9491255 | 4.2132<br>50742 | 2.074933<br>777      | 1.34<br>E-05 | 0.00<br>038  | Up   |
| RAB15     | 1004.7<br>03606 | 336.0864019 | 1673.320811 | 4.9788<br>41158 | 2.315809<br>989      | 4.22<br>E-10 | 3.91<br>E-08 | Up   |
| RAB17     | 82.946<br>36302 | 25.34866847 | 140.5440576 | 5.5444<br>35508 | 2.471040<br>584      | 4.30<br>E-06 | 0.00<br>0145 | Up   |
| RAB19     | 71.220<br>57003 | 22.5236349  | 119.9175052 | 5.3240<br>74274 | 2.412530<br>698      | 9.44<br>E-06 | 0.00<br>0285 | Up   |
| RAB23     | 245.10<br>1335  | 386.4047955 | 103.7978745 | 0.2686<br>24706 | -<br>1.896336<br>097 | 0.00<br>0388 | 0.00<br>6297 | Down |
| RAB25     | 646.61<br>8543  | 230.0701589 | 1063.166927 | 4.6210<br>55301 | 2.208222<br>354      | 7.74<br>E-09 | 5.41<br>E-07 | Up   |
| RAB30     | 639.01<br>71425 | 1002.226914 | 275.8073715 | 0.2751<br>94537 | -<br>1.861476<br>264 | 0.00<br>0354 | 0.00<br>5857 | Down |
| RAB31     | 2324.3<br>49823 | 3638.431065 | 1010.268582 | 0.2776<br>65995 | -<br>1.848577<br>589 | 0.04<br>1442 | 0.19<br>9942 | Down |
| RAB36     | 106.82<br>02439 | 55.27775506 | 158.3627327 | 2.8648<br>54633 | 1.518461<br>936      | 0.00<br>1144 | 0.01<br>4692 | Up   |

|          |                 |             |             |                 |                      |              |              |      |
|----------|-----------------|-------------|-------------|-----------------|----------------------|--------------|--------------|------|
| RAB37    | 153.29<br>59091 | 91.78668779 | 214.8051303 | 2.3402<br>64536 | 1.226671<br>617      | 0.00<br>4853 | 0.04<br>3551 | Up   |
| RAB3B    | 18.431<br>58866 | 32.42092322 | 4.442254091 | 0.1370<br>18124 | -<br>2.867561<br>353 | 0.00<br>1172 | 0.01<br>4937 | Down |
| RAB3C    | 145.68<br>31285 | 215.1596713 | 76.20658573 | 0.3541<br>86197 | -<br>1.497420<br>105 | 0.00<br>0518 | 0.00<br>7931 | Down |
| RAB3IL1  | 643.18<br>39432 | 923.5109362 | 362.8569502 | 0.3929<br>1029  | -<br>1.347728<br>142 | 0.00<br>0204 | 0.00<br>3768 | Down |
| RAB6B    | 35.125<br>29185 | 61.40912537 | 8.841458329 | 0.1439<br>76295 | -<br>2.796096<br>8   | 0.00<br>0558 | 0.00<br>837  | Down |
| RABAC1   | 3547.7<br>86812 | 5020.241029 | 2075.332594 | 0.4133<br>93019 | -<br>1.274414<br>07  | 0.00<br>0226 | 0.00<br>4058 | Down |
| RABGEF1  | 476.67<br>49292 | 646.1450152 | 307.2048431 | 0.4754<br>42565 | -<br>1.072657<br>027 | 0.00<br>4324 | 0.03<br>983  | Down |
| RAC2     | 715.11<br>40083 | 378.5792353 | 1051.648781 | 2.7778<br>82893 | 1.473985<br>781      | 3.74<br>E-05 | 0.00<br>0915 | Up   |
| RAET1G   | 12.142<br>66353 | 4.076669888 | 20.20865717 | 4.9571<br>48292 | 2.309510<br>417      | 0.03<br>5739 | 0.18<br>1902 | Up   |
| RAI14    | 1778.2<br>92488 | 2527.621138 | 1028.963838 | 0.4070<br>87843 | -<br>1.296587<br>955 | 0.00<br>0172 | 0.00<br>3256 | Down |
| RAI2     | 430.52<br>56853 | 617.1381442 | 243.9132264 | 0.3952<br>32783 | -<br>1.339225<br>476 | 0.00<br>0296 | 0.00<br>5031 | Down |
| RALGPS1  | 94.660<br>07839 | 59.98934288 | 129.3308139 | 2.1558<br>96492 | 1.108287<br>914      | 0.02<br>0471 | 0.12<br>3635 | Up   |
| RAMP1    | 320.17<br>11874 | 146.1265283 | 494.2158465 | 3.3821<br>09    | 1.757923<br>156      | 0.00<br>3021 | 0.03<br>0671 | Up   |
| RAMP2    | 2042.7<br>38145 | 2727.181391 | 1358.294899 | 0.4980<br>58143 | -<br>1.005613<br>923 | 0.00<br>2983 | 0.03<br>0387 | Down |
| RAMP3    | 101.15<br>02147 | 145.2210098 | 57.07941959 | 0.3930<br>52077 | -<br>1.347207<br>62  | 0.03<br>011  | 0.16<br>1767 | Down |
| RAP1GAP  | 405.19<br>59088 | 100.5326904 | 709.8591271 | 7.0609<br>78117 | 2.819868<br>046      | 1.42<br>E-12 | 2.04<br>E-10 | Up   |
| RAP1GAP2 | 314.64<br>37251 | 108.9656033 | 520.321847  | 4.7751<br>01788 | 2.255531<br>486      | 8.91<br>E-09 | 6.20<br>E-07 | Up   |

|          |                 |             |             |                 |                      |              |              |      |
|----------|-----------------|-------------|-------------|-----------------|----------------------|--------------|--------------|------|
| RAPGEFL1 | 502.68<br>49917 | 254.8099563 | 750.560027  | 2.9455<br>67897 | 1.558545<br>808      | 4.27<br>E-05 | 0.00<br>1021 | Up   |
| RARRES1  | 10256.<br>47094 | 19710.39009 | 802.5517919 | 0.0407<br>17195 | -<br>4.618218<br>021 | 0.02<br>6422 | 0.14<br>7734 | Down |
| RASA4B   | 820.62<br>42504 | 1112.465369 | 528.7831322 | 0.4753<br>25477 | -<br>1.073012<br>363 | 0.02<br>6401 | 0.14<br>7734 | Down |
| RASAL3   | 191.33<br>66698 | 94.42041069 | 288.2529289 | 3.0528<br>66714 | 1.610164<br>604      | 0.00<br>0122 | 0.00<br>2436 | Up   |
| RASGEF1C | 75.389<br>32053 | 10.56568154 | 140.2129595 | 13.270<br>60247 | 3.730161<br>964      | 0.00<br>0143 | 0.00<br>2772 | Up   |
| RASGRF2  | 485.35<br>69979 | 747.4957689 | 223.218227  | 0.2986<br>21392 | -<br>1.743610<br>577 | 4.16<br>E-06 | 0.00<br>014  | Down |
| RASGRP1  | 332.77<br>69099 | 178.270639  | 487.2831809 | 2.7333<br>89995 | 1.450691<br>315      | 0.00<br>0217 | 0.00<br>3938 | Up   |
| RASGRP2  | 367.74<br>17902 | 505.9556853 | 229.527895  | 0.4536<br>52171 | -<br>1.140341<br>532 | 0.01<br>5006 | 0.09<br>9214 | Down |
| RASL11B  | 354.43<br>29298 | 576.2390334 | 132.6268262 | 0.2301<br>59393 | -<br>2.119294<br>773 | 0.00<br>0249 | 0.00<br>4373 | Down |
| RASSF10  | 234.32<br>81664 | 86.76219832 | 381.8941345 | 4.4016<br>18929 | 2.138034<br>249      | 3.00<br>E-07 | 1.37<br>E-05 | Up   |
| RASSF3   | 664.90<br>09043 | 1013.548146 | 316.2536622 | 0.3120<br>26284 | -<br>1.680260<br>531 | 0.00<br>7651 | 0.06<br>1113 | Down |
| RASSF6   | 255.70<br>00817 | 61.0645968  | 450.3355667 | 7.3747<br>40689 | 2.882592<br>322      | 1.08<br>E-08 | 7.25<br>E-07 | Up   |
| RASSF7   | 229.77<br>29065 | 111.4571677 | 348.0886454 | 3.1230<br>70976 | 1.642965<br>357      | 8.01<br>E-05 | 0.00<br>1733 | Up   |
| RASSF9   | 398.19<br>14312 | 596.8457812 | 199.5370813 | 0.3343<br>19329 | -<br>1.580701<br>325 | 0.01<br>0801 | 0.07<br>819  | Down |
| RAVER2   | 186.91<br>4227  | 287.4022476 | 86.42620633 | 0.3007<br>15137 | -<br>1.733530<br>603 | 0.03<br>9139 | 0.19<br>2986 | Down |
| RBBP8NL  | 647.42<br>16671 | 180.7418037 | 1114.10153  | 6.1640<br>50085 | 2.623878<br>584      | 1.26<br>E-08 | 8.22<br>E-07 | Up   |
| RBMS3    | 810.99<br>22667 | 1154.698706 | 467.2858277 | 0.4046<br>8204  | -<br>1.305139<br>272 | 0.00<br>0299 | 0.00<br>5072 | Down |
| RBP4     | 1469.2          | 2365.407873 | 573.0226925 | 0.2422          | -                    | 5.60         | 4.07         | Down |

|       |                 |             |             |                 |                      |              |              |          |
|-------|-----------------|-------------|-------------|-----------------|----------------------|--------------|--------------|----------|
|       | 15283           |             |             | 51114           | 2.045424<br>795      | E-09         | E-07         | n        |
| RBPMS | 2236.5<br>77808 | 3352.935503 | 1120.220113 | 0.3341<br>01301 | -<br>1.581642<br>496 | 0.01<br>1577 | 0.08<br>2067 | Dow<br>n |
| RCAN2 | 316.49<br>49598 | 463.1450148 | 169.8449048 | 0.3667<br>20788 | -<br>1.447246<br>046 | 0.00<br>0199 | 0.00<br>3674 | Dow<br>n |
| RCN1  | 11054.<br>35334 | 18846.71095 | 3261.995735 | 0.1730<br>80372 | -<br>2.530485<br>971 | 0.00<br>1924 | 0.02<br>165  | Dow<br>n |
| RCN3  | 3761.5<br>36661 | 6258.793694 | 1264.279627 | 0.2020<br>00527 | -<br>2.307569<br>035 | 0.00<br>0327 | 0.00<br>5489 | Dow<br>n |
| RDX   | 3067.3<br>57928 | 4186.344624 | 1948.371231 | 0.4654<br>11094 | -<br>1.103422<br>495 | 0.00<br>1221 | 0.01<br>5421 | Dow<br>n |
| RECK  | 1152.2<br>00547 | 1726.516616 | 577.884478  | 0.3347<br>11217 | -<br>1.579011<br>194 | 1.33<br>E-05 | 0.00<br>0378 | Dow<br>n |
| RELB  | 950.93<br>49992 | 551.0100238 | 1350.859975 | 2.4516<br>06897 | 1.293727<br>669      | 0.00<br>0233 | 0.00<br>4145 | Up       |
| RELN  | 864.07<br>64956 | 1513.628368 | 214.5246234 | 0.1417<br>28728 | -<br>2.818795<br>876 | 2.49<br>E-05 | 0.00<br>0651 | Dow<br>n |
| REPS2 | 157.77<br>03093 | 48.80269318 | 266.7379254 | 5.4656<br>39455 | 2.450390<br>295      | 4.40<br>E-08 | 2.42<br>E-06 | Up       |
| RET   | 282.08<br>24835 | 482.0365905 | 82.1283765  | 0.1703<br>77889 | -<br>2.553189<br>978 | 6.29<br>E-05 | 0.00<br>1427 | Dow<br>n |
| REV3L | 2454.7<br>04768 | 3640.245918 | 1269.163619 | 0.3486<br>47769 | -<br>1.520157<br>844 | 0.03<br>4742 | 0.17<br>9111 | Dow<br>n |
| REXO2 | 1228.8<br>07798 | 1794.581728 | 663.0338688 | 0.3694<br>64293 | -<br>1.436493<br>155 | 3.96<br>E-05 | 0.00<br>0962 | Dow<br>n |
| RFX3  | 250.86<br>8634  | 154.5412999 | 347.1959681 | 2.2466<br>22542 | 1.167757<br>756      | 0.00<br>2942 | 0.03<br>0036 | Up       |
| RGL1  | 1113.1<br>58206 | 1708.374354 | 517.9420578 | 0.3031<br>78315 | -<br>1.721761<br>528 | 3.01<br>E-05 | 0.00<br>076  | Dow<br>n |
| RGS10 | 251.17<br>18361 | 114.6064848 | 387.7371873 | 3.3832<br>04605 | 1.758390<br>429      | 1.20<br>E-05 | 0.00<br>0348 | Up       |
| RGS11 | 114.27          | 70.19845796 | 158.3483935 | 2.2557          | 1.173590             | 0.01         | 0.07         | Up       |



|         |                 |             |             |                 |                      |              |              |      |
|---------|-----------------|-------------|-------------|-----------------|----------------------|--------------|--------------|------|
|         | 34257           |             |             | 24671           | 986                  | 0133         | 4478         |      |
| RGS20   | 46.228<br>89927 | 17.66447643 | 74.79332212 | 4.2341<br>09198 | 2.082058<br>477      | 0.00<br>0579 | 0.00<br>8639 | Up   |
| RGS6    | 87.683<br>50637 | 119.810636  | 55.55637676 | 0.4637<br>01543 | -<br>1.108731<br>568 | 0.02<br>4813 | 0.14<br>1671 | Down |
| RGS7    | 263.57<br>60911 | 374.6289381 | 152.5232441 | 0.4071<br>31507 | -<br>1.296433<br>223 | 0.02<br>9108 | 0.15<br>8218 | Down |
| RHBDD2  | 1183.3<br>0901  | 739.7266017 | 1626.891419 | 2.1993<br>14471 | 1.137053<br>904      | 0.00<br>124  | 0.01<br>5602 | Up   |
| RHBDL2  | 410.07<br>87523 | 229.6398323 | 590.5176724 | 2.5714<br>94965 | 1.362607<br>329      | 0.00<br>8994 | 0.06<br>8807 | Up   |
| RHBDL3  | 53.305<br>90356 | 24.14783285 | 82.46397427 | 3.4149<br>63769 | 1.771870<br>272      | 0.00<br>2412 | 0.02<br>5789 | Up   |
| RHBG    | 709.42<br>98984 | 354.660378  | 1064.199419 | 3.0006<br>15476 | 1.585258<br>452      | 0.00<br>9716 | 0.07<br>2439 | Up   |
| RHOB    | 6360.4<br>60792 | 8757.761001 | 3963.160583 | 0.4525<br>31256 | -<br>1.143910<br>654 | 0.00<br>4031 | 0.03<br>7627 | Down |
| RHOBTB3 | 2670.3<br>38217 | 4151.061186 | 1189.615249 | 0.2865<br>80996 | -<br>1.802985<br>151 | 2.96<br>E-07 | 1.36<br>E-05 | Down |
| RHOQ    | 684.73<br>29483 | 920.4709757 | 448.9949209 | 0.4877<br>88244 | -<br>1.035673<br>106 | 0.00<br>4472 | 0.04<br>0857 | Down |
| RHOV    | 725.54<br>74317 | 108.6142191 | 1342.480644 | 12.360<br>08191 | 3.627616<br>399      | 7.09<br>E-20 | 3.48<br>E-17 | Up   |
| RIC3    | 515.98<br>46119 | 147.7311292 | 884.2380946 | 5.9854<br>55465 | 2.581461<br>034      | 6.88<br>E-08 | 3.67<br>E-06 | Up   |
| RIIAD1  | 18.370<br>93136 | 7.418276237 | 29.32358648 | 3.9528<br>8414  | 1.982905<br>67       | 0.02<br>4501 | 0.14<br>0318 | Up   |
| RILP    | 147.25<br>66516 | 204.8052148 | 89.70808832 | 0.4380<br>16622 | -<br>1.190942<br>477 | 0.00<br>5093 | 0.04<br>5237 | Down |
| RIMKLA  | 17.084<br>70305 | 27.88237131 | 6.287034788 | 0.2254<br>84221 | -<br>2.148901<br>612 | 0.01<br>8692 | 0.11<br>6032 | Down |
| RIN2    | 2150.5<br>11539 | 1318.547575 | 2982.475504 | 2.2619<br>40002 | 1.177560<br>663      | 0.00<br>0653 | 0.00<br>943  | Up   |
| RINL    | 128.20<br>79907 | 78.56022879 | 177.8557526 | 2.2639<br>41377 | 1.178836<br>601      | 0.00<br>7381 | 0.05<br>9441 | Up   |
| RIPK4   | 1006.4<br>94305 | 233.8649178 | 1779.123692 | 7.6074<br>84305 | 2.927419<br>452      | 1.27<br>E-14 | 2.64<br>E-12 | Up   |

|         |                 |             |             |                 |                      |              |              |      |
|---------|-----------------|-------------|-------------|-----------------|----------------------|--------------|--------------|------|
| RIPPLY3 | 91.772<br>67411 | 8.315985411 | 175.2293628 | 21.071<br>38892 | 4.397213<br>507      | 3.85<br>E-06 | 0.00<br>013  | Up   |
| RNF128  | 862.32<br>6854  | 362.8943511 | 1361.759357 | 3.7524<br>95328 | 1.907850<br>276      | 1.27<br>E-05 | 0.00<br>0364 | Up   |
| RNF149  | 1879.6<br>04539 | 1172.109501 | 2587.099577 | 2.2072<br>16625 | 1.142228<br>229      | 0.00<br>079  | 0.01<br>1031 | Up   |
| RNF150  | 1037.4<br>90492 | 1482.921719 | 592.0592655 | 0.3992<br>51867 | -<br>1.324628<br>939 | 0.00<br>3727 | 0.03<br>5635 | Down |
| RNF217  | 58.471<br>20864 | 82.47750315 | 34.46491412 | 0.4178<br>70483 | -<br>1.258872<br>238 | 0.02<br>1568 | 0.12<br>8423 | Down |
| RNF39   | 240.12<br>06164 | 101.869301  | 378.3719319 | 3.7142<br>88095 | 1.893085<br>721      | 5.49<br>E-06 | 0.00<br>018  | Up   |
| RNPEP   | 1709.4<br>83012 | 824.8776979 | 2594.088327 | 3.1448<br>1569  | 1.652975<br>467      | 3.39<br>E-06 | 0.00<br>0118 | Up   |
| ROBO3   | 91.749<br>34696 | 174.3046225 | 9.194071393 | 0.0527<br>47146 | -<br>4.244763<br>151 | 1.74<br>E-14 | 3.39<br>E-12 | Down |
| ROCK2   | 1779.1<br>1921  | 2648.858956 | 909.3794635 | 0.3433<br>09885 | -<br>1.542416<br>697 | 0.00<br>2302 | 0.02<br>4862 | Down |
| ROGDI   | 2817.4<br>58983 | 1745.05332  | 3889.864647 | 2.2290<br>80683 | 1.156448<br>837      | 0.00<br>1042 | 0.01<br>3692 | Up   |
| ROM1    | 696.56<br>87444 | 463.659742  | 929.4777468 | 2.0046<br>54842 | 1.003353<br>857      | 0.00<br>6066 | 0.05<br>1249 | Up   |
| ROR2    | 287.19<br>84517 | 402.2749788 | 172.1219246 | 0.4278<br>71316 | -<br>1.224751<br>129 | 0.03<br>2009 | 0.16<br>8786 | Down |
| RORA    | 138.33<br>7835  | 218.4757452 | 58.19992488 | 0.2663<br>90783 | -<br>1.908383<br>927 | 0.00<br>7804 | 0.06<br>1868 | Down |
| RORC    | 1015.1<br>945   | 123.5164713 | 1906.872528 | 15.438<br>20438 | 3.948433<br>057      | 1.82<br>E-23 | 1.65<br>E-20 | Up   |
| RPH3AL  | 504.45<br>01806 | 279.4364239 | 729.4639373 | 2.6104<br>82654 | 1.384316<br>572      | 0.00<br>0194 | 0.00<br>3603 | Up   |
| RPP40   | 299.28<br>48071 | 415.2965451 | 183.2730692 | 0.4413<br>06511 | -<br>1.180147<br>063 | 0.00<br>2426 | 0.02<br>5884 | Down |
| RPS6KA1 | 710.42<br>83247 | 370.9702715 | 1049.886378 | 2.8301<br>09199 | 1.500857<br>72       | 3.45<br>E-05 | 0.00<br>0859 | Up   |
| RPS6KA6 | 804.99<br>73453 | 480.1386337 | 1129.856057 | 2.3531<br>87137 | 1.234616<br>056      | 0.00<br>0581 | 0.00<br>8646 | Up   |
| RPS6KL1 | 308.88          | 464.6072946 | 153.1628622 | 0.3296          | -                    | 3.68         | 0.00         | Down |

|         |                 |             |             |                 |                      |              |              |          |
|---------|-----------------|-------------|-------------|-----------------|----------------------|--------------|--------------|----------|
|         | 50784           |             |             | 60907           | 1.600945<br>279      | E-05         | 0906         | n        |
| RRAS    | 1635.2<br>14144 | 2615.223358 | 655.2049293 | 0.2505<br>34979 | -<br>1.996916<br>052 | 0.01<br>3936 | 0.09<br>4231 | Dow<br>n |
| RSG1    | 437.94<br>32713 | 198.7991751 | 677.0873675 | 3.4058<br>86202 | 1.768030<br>232      | 3.81<br>E-06 | 0.00<br>013  | Up       |
| RSPH3   | 214.59<br>93844 | 139.030904  | 290.1678648 | 2.0870<br>74574 | 1.061482<br>151      | 0.00<br>895  | 0.06<br>8592 | Up       |
| RSPO2   | 31.824<br>31946 | 59.7690578  | 3.879581131 | 0.0649<br>09525 | -<br>3.945425<br>999 | 0.00<br>3751 | 0.03<br>5784 | Dow<br>n |
| RSPO3   | 182.88<br>70393 | 359.2296803 | 6.544398359 | 0.0182<br>17867 | -<br>5.778502<br>175 | 0.01<br>3125 | 0.08<br>9851 | Dow<br>n |
| RSU1    | 2032.0<br>76721 | 2766.729954 | 1297.423489 | 0.4689<br>37522 | -<br>1.092532<br>374 | 0.03<br>1516 | 0.16<br>6909 | Dow<br>n |
| RTKN    | 698.73<br>6785  | 304.0750088 | 1093.398561 | 3.5958<br>18563 | 1.846320<br>227      | 5.86<br>E-07 | 2.52<br>E-05 | Up       |
| RTP3    | 41.325<br>00672 | 5.137509957 | 77.51250348 | 15.087<br>56268 | 3.915287<br>859      | 7.31<br>E-08 | 3.86<br>E-06 | Up       |
| RUFY4   | 14.455<br>62775 | 3.667382879 | 25.24387261 | 6.8833<br>48001 | 2.783110<br>45       | 0.00<br>7655 | 0.06<br>1113 | Up       |
| RUNDC3B | 132.16<br>10493 | 79.52496801 | 184.7971305 | 2.3237<br>624   | 1.216462<br>564      | 0.00<br>6483 | 0.05<br>3744 | Up       |
| RUNX1   | 1550.2<br>52653 | 990.7252788 | 2109.780026 | 2.1295<br>30831 | 1.090535<br>617      | 0.00<br>1506 | 0.01<br>8109 | Up       |
| RUNX1T1 | 48.241<br>09861 | 71.82590601 | 24.6562912  | 0.3432<br>78527 | -<br>1.542548<br>48  | 0.00<br>815  | 0.06<br>3912 | Dow<br>n |
| RUNX3   | 80.431<br>01871 | 46.30860611 | 114.5534313 | 2.4736<br>96381 | 1.306668<br>436      | 0.00<br>9154 | 0.06<br>9418 | Up       |
| RUSC2   | 1795.5<br>39048 | 3068.375336 | 522.7027608 | 0.1703<br>51637 | -<br>2.553412<br>286 | 9.93<br>E-05 | 0.00<br>2064 | Dow<br>n |
| RXFP2   | 9.9182<br>68208 | 19.56702585 | 0.269510562 | 0.0137<br>73711 | -<br>6.181938<br>865 | 0.00<br>0313 | 0.00<br>528  | Dow<br>n |
| RXRG    | 23.024<br>25509 | 43.69625338 | 2.352256814 | 0.0538<br>32002 | -<br>4.215392<br>101 | 2.83<br>E-06 | 0.00<br>01   | Dow<br>n |
| RYR3    | 1859.1<br>73584 | 928.2636573 | 2790.083511 | 3.0057<br>01547 | 1.587701<br>763      | 0.00<br>1508 | 0.01<br>8109 | Up       |

|         |                 |             |             |                 |                      |              |              |          |
|---------|-----------------|-------------|-------------|-----------------|----------------------|--------------|--------------|----------|
| S100A10 | 4530.2<br>69172 | 6300.713405 | 2759.824939 | 0.4380<br>1785  | -<br>1.190938<br>431 | 0.00<br>0482 | 0.00<br>7527 | Dow<br>n |
| S100A2  | 1415.0<br>91304 | 335.0711554 | 2495.111452 | 7.4465<br>12216 | 2.896564<br>857      | 5.11<br>E-15 | 1.15<br>E-12 | Up       |
| S100A4  | 8763.9<br>25007 | 14240.75031 | 3287.099702 | 0.2308<br>23491 | -<br>2.115138<br>04  | 0.00<br>3452 | 0.03<br>3731 | Dow<br>n |
| S100A6  | 150.99<br>02961 | 228.5995183 | 73.38107394 | 0.3210<br>0275  | -<br>1.639342<br>44  | 0.00<br>2584 | 0.02<br>7175 | Dow<br>n |
| S100B   | 2664.8<br>74431 | 1776.290593 | 3553.45827  | 2.0004<br>93773 | 1.000356<br>138      | 0.00<br>4423 | 0.04<br>0496 | Up       |
| S100G   | 144.39<br>59608 | 287.9715639 | 0.820357604 | 0.0028<br>48745 | -<br>8.455457<br>708 | 0.02<br>4892 | 0.14<br>1891 | Dow<br>n |
| S1PR1   | 1704.2<br>47296 | 2425.739681 | 982.7549101 | 0.4051<br>36181 | -<br>1.303521<br>164 | 0.00<br>0144 | 0.00<br>2782 | Dow<br>n |
| S1PR3   | 269.50<br>58374 | 369.025664  | 169.9860108 | 0.4606<br>34659 | -<br>1.118305<br>13  | 0.00<br>4429 | 0.04<br>0529 | Dow<br>n |
| S1PR5   | 180.46<br>00441 | 68.8601114  | 292.0599768 | 4.2413<br>52082 | 2.084524<br>249      | 1.20<br>E-06 | 4.72<br>E-05 | Up       |
| SAA3    | 7835.0<br>62635 | 695.5670749 | 14974.55819 | 21.528<br>56099 | 4.428179<br>985      | 2.60<br>E-07 | 1.22<br>E-05 | Up       |
| SACS    | 874.02<br>55646 | 1368.217611 | 379.8335177 | 0.2776<br>1192  | -<br>1.848858<br>581 | 0.01<br>6366 | 0.10<br>5513 | Dow<br>n |
| SALL2   | 347.05<br>2302  | 180.623957  | 513.4806469 | 2.8428<br>15844 | 1.507320<br>645      | 8.94<br>E-05 | 0.00<br>1903 | Up       |
| SAMD10  | 120.59<br>17072 | 58.32112469 | 182.8622897 | 3.1354<br>38328 | 1.648667<br>143      | 0.00<br>0344 | 0.00<br>5729 | Up       |
| SAMD14  | 215.82<br>57103 | 330.0620761 | 101.5893445 | 0.3077<br>886   | -<br>1.699988<br>295 | 0.02<br>6522 | 0.14<br>7928 | Dow<br>n |
| SAMD4A  | 1947.4<br>56381 | 3296.212271 | 598.700491  | 0.1816<br>32869 | -<br>2.460902<br>794 | 0.00<br>3674 | 0.03<br>5257 | Dow<br>n |
| SAMHD1  | 431.47<br>84715 | 280.2725452 | 582.6843977 | 2.0789<br>92066 | 1.055884<br>252      | 0.00<br>3768 | 0.03<br>5882 | Up       |
| SAMSN1  | 199.13<br>2203  | 118.1019279 | 280.162478  | 2.3722<br>09185 | 1.246231<br>234      | 0.01<br>7063 | 0.10<br>8541 | Up       |
| SAP25   | 267.94          | 170.1079006 | 365.7791341 | 2.1502          | 1.104522             | 0.00         | 0.04         | Up       |

|         |                 |             |             |                 |                      |              |              |      |
|---------|-----------------|-------------|-------------|-----------------|----------------------|--------------|--------------|------|
|         | 35174           |             |             | 77164           | 631                  | 5029         | 4798         |      |
| SAPCD2  | 723.08<br>13567 | 249.9544077 | 1196.208306 | 4.7857<br>05989 | 2.258731<br>767      | 2.01<br>E-09 | 1.64<br>E-07 | Up   |
| SAR1A   | 4308.0<br>27555 | 5824.640446 | 2791.414663 | 0.4792<br>42399 | -<br>1.061172<br>543 | 0.00<br>1913 | 0.02<br>1594 | Down |
| SAR1B   | 317.20<br>10332 | 467.7360362 | 166.6660302 | 0.3563<br>24972 | -<br>1.488734<br>499 | 0.00<br>0138 | 0.00<br>2702 | Down |
| SASH3   | 372.95<br>41618 | 231.7037272 | 514.2045965 | 2.2192<br>33168 | 1.150061<br>255      | 0.00<br>2014 | 0.02<br>239  | Up   |
| SATB1   | 1275.1<br>75994 | 677.435436  | 1872.916553 | 2.7647<br>15946 | 1.467131<br>262      | 3.52<br>E-05 | 0.00<br>0874 | Up   |
| SBK1    | 37.624<br>88741 | 17.00225286 | 58.24752196 | 3.4258<br>70821 | 1.776470<br>753      | 0.00<br>7787 | 0.06<br>1814 | Up   |
| SBK2    | 32.927<br>62449 | 4.76771318  | 61.0875358  | 12.812<br>75393 | 3.679508<br>692      | 2.64<br>E-06 | 9.50<br>E-05 | Up   |
| SCARA3  | 2742.8<br>77453 | 1562.556313 | 3923.198594 | 2.5107<br>56612 | 1.328122<br>183      | 0.00<br>0147 | 0.00<br>2841 | Up   |
| SCARA5  | 5331.0<br>09999 | 9053.038524 | 1608.981475 | 0.1777<br>28336 | -<br>2.492254<br>378 | 0.03<br>0577 | 0.16<br>3371 | Down |
| SCARF2  | 1202.4<br>12445 | 1751.108454 | 653.716436  | 0.3733<br>1579  | -<br>1.421531<br>563 | 4.47<br>E-05 | 0.00<br>1058 | Down |
| SCEL    | 11.626<br>1441  | 1.197430826 | 22.05485738 | 18.418<br>48139 | 4.203082<br>21       | 0.00<br>1329 | 0.01<br>6501 | Up   |
| SCG3    | 51.585<br>28071 | 85.89780974 | 17.27275169 | 0.2010<br>84891 | -<br>2.314123<br>411 | 0.03<br>1508 | 0.16<br>6909 | Down |
| SCGB1D  | 1047.7<br>27534 | 176.4453632 | 1919.009706 | 10.875<br>94296 | 3.443068<br>585      | 6.02<br>E-19 | 2.54<br>E-16 | Up   |
| SCGB2A2 | 338.88<br>90902 | 34.3296423  | 643.448538  | 18.743<br>23456 | 4.228298<br>039      | 2.24<br>E-21 | 1.43<br>E-18 | Up   |
| SCHIP1  | 492.14<br>13819 | 819.0223729 | 165.2603909 | 0.2017<br>77627 | -<br>2.309161<br>876 | 0.00<br>6062 | 0.05<br>1236 | Down |
| SCML1   | 152.88<br>4732  | 227.5853086 | 78.18415533 | 0.3435<br>37796 | -<br>1.541459<br>262 | 0.00<br>311  | 0.03<br>1347 | Down |
| SCML4   | 87.621<br>51145 | 53.04814919 | 122.1948737 | 2.3034<br>71008 | 1.203809<br>44       | 0.01<br>309  | 0.08<br>9746 | Up   |
| SCN10A  | 11.414<br>54222 | 0.854174188 | 21.97491026 | 25.726<br>49768 | 4.685183<br>162      | 0.00<br>5328 | 0.04<br>6688 | Up   |

|         |                 |             |             |                 |                      |              |              |          |
|---------|-----------------|-------------|-------------|-----------------|----------------------|--------------|--------------|----------|
| SCN3A   | 432.16<br>06107 | 770.8087612 | 93.51246012 | 0.1213<br>17329 | -<br>3.043142<br>454 | 1.39<br>E-05 | 0.00<br>039  | Dow<br>n |
| SCN5A   | 19.424<br>11951 | 3.592292478 | 35.25594655 | 9.8143<br>30756 | 3.294889<br>893      | 0.00<br>0567 | 0.00<br>8484 | Up       |
| SCN7A   | 37.461<br>61019 | 74.09103685 | 0.832183522 | 0.0112<br>31905 | -<br>6.476253<br>491 | 0.02<br>7807 | 0.15<br>3117 | Dow<br>n |
| SCNN1D  | 161.11<br>59395 | 64.99026208 | 257.241617  | 3.9581<br>56325 | 1.984828<br>592      | 6.28<br>E-06 | 0.00<br>0201 | Up       |
| SCNN1G  | 41.751<br>68265 | 11.82023739 | 71.6831279  | 6.0644<br>40629 | 2.600374<br>58       | 0.00<br>0107 | 0.00<br>2179 | Up       |
| SCRG1   | 36.329<br>05145 | 18.35779931 | 54.30030359 | 2.9578<br>87418 | 1.564567<br>142      | 0.02<br>1733 | 0.12<br>9068 | Up       |
| SCRN1   | 435.52<br>76983 | 757.2647662 | 113.7906303 | 0.1502<br>65317 | -<br>2.734416<br>036 | 9.96<br>E-05 | 0.00<br>2065 | Dow<br>n |
| SCUBE2  | 1352.4<br>8277  | 2166.275775 | 538.6897654 | 0.2486<br>70909 | -<br>2.007690<br>354 | 1.42<br>E-05 | 0.00<br>0398 | Dow<br>n |
| SCX     | 20.735<br>14953 | 37.40305325 | 4.067245808 | 0.1087<br>41011 | -<br>3.201031<br>954 | 0.00<br>8957 | 0.06<br>8617 | Dow<br>n |
| SDC1    | 2033.4<br>18776 | 1311.149183 | 2755.68837  | 2.1017<br>35184 | 1.071580<br>903      | 0.00<br>2466 | 0.02<br>6152 | Up       |
| SDC2    | 3837.7<br>61709 | 6129.778331 | 1545.745088 | 0.2521<br>69818 | -<br>1.987532<br>483 | 4.64<br>E-05 | 0.00<br>1096 | Dow<br>n |
| SDCBP2  | 27.416<br>62688 | 12.91716289 | 41.91609086 | 3.2449<br>92047 | 1.698214<br>942      | 0.02<br>4331 | 0.13<br>9734 | Up       |
| SDK1    | 826.10<br>6544  | 1314.129    | 338.0840882 | 0.2572<br>6857  | -<br>1.958652<br>88  | 0.00<br>0666 | 0.00<br>9591 | Dow<br>n |
| SDPR    | 1319.0<br>41346 | 1782.5298   | 855.552891  | 0.4799<br>65547 | -<br>1.058997<br>245 | 0.01<br>2313 | 0.08<br>5551 | Dow<br>n |
| SDR42E1 | 142.30<br>51721 | 78.15923632 | 206.451108  | 2.6414<br>16647 | 1.401311<br>885      | 0.00<br>1616 | 0.01<br>8989 | Up       |
| SDR9C7  | 373.57<br>11737 | 24.91284132 | 722.2295061 | 28.990<br>25032 | 4.857495<br>885      | 6.80<br>E-27 | 9.50<br>E-24 | Up       |
| SEC14L2 | 44.758<br>55711 | 13.06670374 | 76.45041047 | 5.8507<br>80117 | 2.548629             | 6.87<br>E-05 | 0.00<br>1534 | Up       |
| SEC14L4 | 39.330<br>07456 | 6.929368812 | 71.73078032 | 10.351<br>70479 | 3.371796<br>475      | 1.73<br>E-06 | 6.60<br>E-05 | Up       |

|         |                 |             |             |                 |                      |              |              |          |
|---------|-----------------|-------------|-------------|-----------------|----------------------|--------------|--------------|----------|
| SEC22B  | 2443.1<br>47628 | 3343.509322 | 1542.785934 | 0.4614<br>27137 | -<br>1.115825<br>242 | 0.00<br>1191 | 0.01<br>5108 | Dow<br>n |
| SEC23A  | 2080.4<br>84939 | 3330.037495 | 830.9323836 | 0.2495<br>26435 | -<br>2.002735<br>433 | 0.00<br>2628 | 0.02<br>7487 | Dow<br>n |
| SEC24A  | 1303.8<br>67395 | 1767.800305 | 839.9344842 | 0.4751<br>29732 | -<br>1.073606<br>608 | 0.00<br>2215 | 0.02<br>4155 | Dow<br>n |
| SEC24D  | 3410.8<br>65165 | 5237.926468 | 1583.803862 | 0.3023<br>72298 | -<br>1.725602<br>123 | 6.80<br>E-07 | 2.85<br>E-05 | Dow<br>n |
| SEC61A1 | 4323.9<br>32383 | 5798.912227 | 2848.952539 | 0.4912<br>90854 | -<br>1.025350<br>714 | 0.00<br>6786 | 0.05<br>5599 | Dow<br>n |
| SEC61G  | 1391.7<br>14327 | 1893.952336 | 889.4763183 | 0.4696<br>40287 | -<br>1.090371<br>923 | 0.00<br>1648 | 0.01<br>9249 | Dow<br>n |
| SECTM1A | 4.5605<br>94767 | 8.839853053 | 0.28133648  | 0.0318<br>25923 | -<br>4.973653<br>847 | 0.02<br>1073 | 0.12<br>6391 | Dow<br>n |
| SELM    | 962.83<br>41126 | 1493.716042 | 431.9521831 | 0.2891<br>79584 | -<br>1.789962<br>395 | 4.92<br>E-07 | 2.17<br>E-05 | Dow<br>n |
| SEMA3A  | 281.80<br>03022 | 481.1809366 | 82.4196678  | 0.1712<br>86228 | -<br>2.545518<br>933 | 0.00<br>8092 | 0.06<br>3599 | Dow<br>n |
| SEMA3B  | 1832.6<br>75232 | 2641.549156 | 1023.801307 | 0.3875<br>76095 | -<br>1.367448<br>504 | 0.00<br>4396 | 0.04<br>0285 | Dow<br>n |
| SEMA3C  | 1475.5<br>80949 | 2829.238809 | 121.923088  | 0.0430<br>93954 | -<br>4.536370<br>703 | 3.22<br>E-09 | 2.46<br>E-07 | Dow<br>n |
| SEMA3D  | 99.567<br>52846 | 193.9306393 | 5.204417648 | 0.0268<br>3649  | -<br>5.219660<br>203 | 0.00<br>0862 | 0.01<br>177  | Dow<br>n |
| SEMA3E  | 121.47<br>26631 | 63.15855327 | 179.7867729 | 2.8465<br>94224 | 1.509236<br>854      | 0.00<br>3428 | 0.03<br>3527 | Up       |
| SEMA3G  | 2287.6<br>82715 | 1436.12778  | 3139.237651 | 2.1859<br>04134 | 1.128230<br>131      | 0.00<br>1115 | 0.01<br>4404 | Up       |
| SEMA4A  | 1381.7<br>23636 | 776.6334898 | 1986.813782 | 2.5582<br>38614 | 1.355150<br>835      | 0.00<br>0121 | 0.00<br>241  | Up       |
| SEMA4B  | 913.88<br>9231  | 363.1672692 | 1464.611193 | 4.0328<br>83238 | 2.011811<br>637      | 4.72<br>E-08 | 2.58<br>E-06 | Up       |

|            |                 |             |             |                 |                      |              |              |      |
|------------|-----------------|-------------|-------------|-----------------|----------------------|--------------|--------------|------|
| SEMA4D     | 1457.1<br>17075 | 784.3205182 | 2129.913632 | 2.7156<br>16362 | 1.441279<br>683      | 4.40<br>E-05 | 0.00<br>1046 | Up   |
| SEMA4F     | 978.38<br>37444 | 640.2511166 | 1316.516372 | 2.0562<br>50021 | 1.040015<br>694      | 0.00<br>3289 | 0.03<br>2576 | Up   |
| SEMA4G     | 397.44<br>93338 | 261.8981691 | 533.0004986 | 2.0351<br>44042 | 1.025130<br>909      | 0.00<br>6311 | 0.05<br>2803 | Up   |
| SEMA5A     | 2652.7<br>53266 | 3825.955712 | 1479.55082  | 0.3867<br>14048 | -<br>1.370660<br>922 | 0.02<br>5827 | 0.14<br>5391 | Down |
| SEMA5B     | 183.32<br>80878 | 283.9689237 | 82.68725193 | 0.2911<br>84158 | -<br>1.779996<br>228 | 2.55<br>E-05 | 0.00<br>0663 | Down |
| SEMA6B     | 318.61<br>48609 | 490.412219  | 146.8175029 | 0.2993<br>75703 | -<br>1.739970<br>956 | 6.06<br>E-06 | 0.00<br>0195 | Down |
| 1-Sep      | 223.56<br>83259 | 107.9324869 | 339.2041649 | 3.1427<br>43901 | 1.652024<br>713      | 5.25<br>E-05 | 0.00<br>1217 | Up   |
| 3-Sep      | 38.155<br>15371 | 21.24658366 | 55.06372377 | 2.5916<br>50717 | 1.373871<br>296      | 0.03<br>4303 | 0.17<br>7341 | Up   |
| SERF1A     | 117.24<br>11661 | 177.0036103 | 57.47872185 | 0.3247<br>31918 | -<br>1.622678<br>901 | 0.00<br>0381 | 0.00<br>6205 | Down |
| SERP1      | 1002.5<br>52328 | 1401.107207 | 603.9974496 | 0.4310<br>8582  | -<br>1.213952<br>986 | 0.00<br>1208 | 0.01<br>53   | Down |
| SERPINA1   | 2265.6<br>51951 | 152.0473294 | 4379.256573 | 28.801<br>93022 | 4.848093<br>595      | 1.55<br>E-33 | 7.04<br>E-30 | Up   |
| SERPINA11  | 714.79<br>00925 | 94.17870939 | 1335.401476 | 14.179<br>44124 | 3.825728<br>777      | 1.36<br>E-17 | 4.32<br>E-15 | Up   |
| SERPINA3-1 | 653.87<br>40186 | 11.40642037 | 1296.341617 | 113.65<br>01702 | 6.828456<br>035      | 3.90<br>E-08 | 2.18<br>E-06 | Up   |
| SERPINA5   | 1624.2<br>63628 | 248.2870053 | 3000.24025  | 12.083<br>75866 | 3.594997<br>37       | 3.64<br>E-21 | 2.20<br>E-18 | Up   |
| SERPINB5   | 463.06<br>97409 | 183.6826978 | 742.4567839 | 4.0420<br>61624 | 2.015091<br>317      | 3.54<br>E-05 | 0.00<br>0876 | Up   |
| SERPIND1   | 12.893<br>1279  | 3.715933142 | 22.07032265 | 5.9393<br>75604 | 2.570311<br>271      | 0.01<br>7559 | 0.11<br>0997 | Up   |
| SERPINF1   | 6133.3<br>00157 | 10459.42873 | 1807.171586 | 0.1727<br>79186 | -<br>2.532998<br>659 | 0.00<br>1747 | 0.02<br>0169 | Down |
| SERPINF2   | 23.238<br>52509 | 5.833568526 | 40.64348165 | 6.9671<br>7309  | 2.800573<br>405      | 0.02<br>3464 | 0.13<br>621  | Up   |
| SERPINH1   | 16022.<br>0249  | 25430.57174 | 6613.478057 | 0.2600<br>6014  | -<br>1.943082        | 1.84<br>E-06 | 6.90<br>E-05 | Down |



|         |                 |             |             |                 |                      |              |              |      |
|---------|-----------------|-------------|-------------|-----------------|----------------------|--------------|--------------|------|
|         |                 |             |             |                 | 801                  |              |              |      |
| SERTAD4 | 3259.9<br>7991  | 2136.096107 | 4383.863713 | 2.0522<br>78312 | 1.037226<br>39       | 0.00<br>7773 | 0.06<br>1733 | Up   |
| SERTM1  | 594.23<br>61512 | 1075.760893 | 112.7114098 | 0.1047<br>73663 | -<br>3.254651<br>977 | 0.00<br>5214 | 0.04<br>5884 | Down |
| SETD7   | 4636.3<br>71177 | 6841.165425 | 2431.576928 | 0.3554<br>33143 | -<br>1.492349<br>881 | 1.64<br>E-05 | 0.00<br>0451 | Down |
| SEZ6L   | 264.96<br>93346 | 525.6137388 | 4.324930451 | 0.0082<br>28344 | -<br>6.925182<br>243 | 0.04<br>6123 | 0.21<br>5981 | Down |
| SFI1    | 675.54<br>20313 | 407.3462613 | 943.7378013 | 2.3167<br>95048 | 1.212130<br>424      | 0.00<br>0688 | 0.00<br>9856 | Up   |
| SFN     | 231.07<br>8082  | 129.57854   | 332.5776241 | 2.5666<br>10367 | 1.359864<br>299      | 0.03<br>9532 | 0.19<br>4193 | Up   |
| SFRP2   | 13148.<br>1287  | 23358.83813 | 2937.419278 | 0.1257<br>51943 | -<br>2.991347<br>405 | 0.00<br>8666 | 0.06<br>677  | Down |
| SFRP4   | 5710.5<br>61865 | 10004.14844 | 1416.975294 | 0.1416<br>38771 | -<br>2.819711<br>86  | 0.00<br>0671 | 0.00<br>9645 | Down |
| SFXN3   | 1801.7<br>29393 | 2658.767704 | 944.6910815 | 0.3553<br>11628 | -<br>1.492843<br>191 | 8.18<br>E-05 | 0.00<br>1763 | Down |
| SFXN5   | 520.46<br>42625 | 292.8714898 | 748.0570352 | 2.5542<br>15966 | 1.352880<br>514      | 0.00<br>0279 | 0.00<br>4802 | Up   |
| SGCE    | 706.98<br>93899 | 1012.973875 | 401.0049046 | 0.3958<br>6895  | -<br>1.336905<br>18  | 0.00<br>1586 | 0.01<br>8771 | Down |
| SGIP1   | 149.82<br>57657 | 244.1840887 | 55.46744275 | 0.2271<br>54206 | -<br>2.138256<br>077 | 0.04<br>5857 | 0.21<br>5125 | Down |
| SGPP2   | 253.09<br>33588 | 75.6849381  | 430.5017795 | 5.6880<br>77314 | 2.507941<br>075      | 3.03<br>E-09 | 2.34<br>E-07 | Up   |
| SGTB    | 114.01<br>53501 | 180.985401  | 47.04529917 | 0.2599<br>39746 | -<br>1.943750<br>849 | 0.00<br>4751 | 0.04<br>2847 | Down |
| SH2D2A  | 54.569<br>99658 | 30.66013452 | 78.47985864 | 2.5596<br>71047 | 1.355958<br>416      | 0.01<br>7197 | 0.10<br>9206 | Up   |
| SH2D3A  | 109.82<br>99589 | 54.39463561 | 165.2652822 | 3.0382<br>6435  | 1.603247<br>4        | 0.00<br>0597 | 0.00<br>8827 | Up   |
| SH2D4A  | 264.04<br>3813  | 62.93607607 | 465.15155   | 7.3908<br>57185 | 2.885741<br>697      | 0.00<br>025  | 0.00<br>4385 | Up   |

|          |                 |             |             |                 |                      |              |              |      |
|----------|-----------------|-------------|-------------|-----------------|----------------------|--------------|--------------|------|
| SH3BGR   | 1163.7<br>8439  | 1909.769816 | 417.7989629 | 0.2187<br>69277 | -<br>2.192517<br>945 | 0.04<br>219  | 0.20<br>2634 | Down |
| SH3BP1   | 754.20<br>52095 | 389.7090233 | 1118.701396 | 2.8706<br>0686  | 1.521355<br>762      | 2.48<br>E-05 | 0.00<br>065  | Up   |
| SH3BP5   | 1907.7<br>49406 | 2623.322506 | 1192.176306 | 0.4544<br>52818 | -<br>1.137797<br>575 | 0.00<br>0852 | 0.01<br>168  | Down |
| SH3D21   | 544.90<br>03257 | 347.9245712 | 741.8760802 | 2.1322<br>89989 | 1.092403<br>656      | 0.00<br>351  | 0.03<br>4165 | Up   |
| SH3GL2   | 56.341<br>78852 | 97.39800103 | 15.285576   | 0.1569<br>3932  | -<br>2.671721<br>245 | 0.00<br>9455 | 0.07<br>1019 | Down |
| SH3PXD2B | 3324.2<br>05392 | 4695.254689 | 1953.156096 | 0.4159<br>85122 | -<br>1.265396<br>164 | 0.00<br>9444 | 0.07<br>0969 | Down |
| SH3RF2   | 155.15<br>39757 | 48.5664209  | 261.7415305 | 5.3893<br>51854 | 2.430111<br>779      | 2.65<br>E-06 | 9.50<br>E-05 | Up   |
| SH3TC2   | 516.83<br>86627 | 324.1963113 | 709.4810141 | 2.1884<br>30248 | 1.129896<br>402      | 0.01<br>4738 | 0.09<br>8048 | Up   |
| SHANK1   | 61.511<br>36096 | 98.58770207 | 24.43501986 | 0.2478<br>50587 | -<br>2.012457<br>418 | 0.00<br>0256 | 0.00<br>447  | Down |
| SHANK2   | 3338.2<br>13602 | 672.4861526 | 6003.941052 | 8.9279<br>7722  | 3.158333<br>346      | 7.18<br>E-16 | 1.92<br>E-13 | Up   |
| SHANK3   | 1443.1<br>29492 | 1967.676775 | 918.5822096 | 0.4668<br>35926 | -<br>1.099012<br>504 | 0.00<br>1269 | 0.01<br>5914 | Down |
| SHE      | 186.44<br>40757 | 291.9412255 | 80.94692586 | 0.2772<br>71309 | -<br>1.850629<br>754 | 9.90<br>E-06 | 0.00<br>0295 | Down |
| SHISA2   | 369.95<br>1393  | 172.2193372 | 567.6834488 | 3.2962<br>81695 | 1.720839<br>538      | 5.50<br>E-06 | 0.00<br>018  | Up   |
| SHISA3   | 14.423<br>83648 | 24.24897812 | 4.598694834 | 0.1896<br>44892 | -<br>2.398627<br>582 | 0.02<br>2009 | 0.13<br>0195 | Down |
| SHISA6   | 64.376<br>96497 | 121.2133352 | 7.540594722 | 0.0622<br>09283 | -<br>4.006726<br>302 | 0.00<br>5844 | 0.04<br>9979 | Down |
| SHOX2    | 320.90<br>71507 | 538.26202   | 103.5522815 | 0.1923<br>82664 | -<br>2.377949<br>291 | 0.00<br>2675 | 0.02<br>7833 | Down |
| SHROOM1  | 451.82<br>02845 | 274.3113787 | 629.3291902 | 2.2942<br>14673 | 1.198000<br>393      | 0.00<br>1441 | 0.01<br>7529 | Up   |

|          |                 |             |             |                 |                      |              |              |      |
|----------|-----------------|-------------|-------------|-----------------|----------------------|--------------|--------------|------|
| SHROOM2  | 128.92<br>97715 | 81.9248741  | 175.9346688 | 2.1475<br>12227 | 1.102666<br>346      | 0.01<br>6849 | 0.10<br>7564 | Up   |
| SHROOM3  | 2483.3<br>24739 | 1030.506706 | 3936.142773 | 3.8196<br>18785 | 1.933428<br>658      | 5.69<br>E-08 | 3.06<br>E-06 | Up   |
| SIDT1    | 122.02<br>91283 | 44.65835329 | 199.3999033 | 4.4650<br>07969 | 2.158662<br>75       | 2.91<br>E-06 | 0.00<br>0102 | Up   |
| SIGLEC15 | 56.439<br>07426 | 17.31215976 | 95.56598875 | 5.5201<br>656   | 2.464711<br>547      | 0.01<br>3233 | 0.09<br>0388 | Up   |
| SIK1     | 480.70<br>06906 | 694.0185684 | 267.3828128 | 0.3852<br>6752  | -<br>1.376067<br>53  | 0.00<br>0191 | 0.00<br>3563 | Down |
| SIM1     | 19.755<br>07183 | 39.51014367 | 0           | 0               | #NAME?               | 0.00<br>3042 | 0.03<br>0804 | Down |
| SIT1     | 107.18<br>8956  | 58.06667404 | 156.311238  | 2.6919<br>26834 | 1.428639<br>198      | 0.00<br>1799 | 0.02<br>0603 | Up   |
| SIX1     | 50.268<br>75723 | 91.57841143 | 8.959103041 | 0.0978<br>29859 | -<br>3.353581<br>333 | 0.00<br>0223 | 0.00<br>4025 | Down |
| SIX2     | 13.814<br>4258  | 23.83111635 | 3.797735246 | 0.1593<br>60359 | -<br>2.649635<br>296 | 0.00<br>8378 | 0.06<br>5219 | Down |
| SIX4     | 272.44<br>2558  | 174.8869826 | 369.9981335 | 2.1156<br>41359 | 1.081095<br>084      | 0.03<br>5545 | 0.18<br>1378 | Up   |
| SKIL     | 1407.8<br>55697 | 1885.938714 | 929.7726806 | 0.4930<br>02595 | -<br>1.020332<br>854 | 0.04<br>2941 | 0.20<br>5321 | Down |
| SLA      | 280.89<br>16804 | 169.9607357 | 391.8226251 | 2.3053<br>71434 | 1.204999<br>212      | 0.01<br>7743 | 0.11<br>1886 | Up   |
| SLAIN1   | 106.53<br>68352 | 29.59299927 | 183.4806712 | 6.2001<br>37724 | 2.632300<br>263      | 1.14<br>E-07 | 5.76<br>E-06 | Up   |
| SLAIN2   | 437.51<br>10847 | 618.938537  | 256.0836323 | 0.4137<br>46466 | -<br>1.273181<br>106 | 0.00<br>4072 | 0.03<br>7871 | Down |
| SLAMF1   | 30.670<br>24615 | 12.71502703 | 48.62546527 | 3.8242<br>51821 | 1.935177<br>526      | 0.00<br>6469 | 0.05<br>3693 | Up   |
| SLAMF7   | 198.12<br>65411 | 115.44279   | 280.8102922 | 2.4324<br>62799 | 1.282417<br>741      | 0.00<br>1375 | 0.01<br>6911 | Up   |
| SLAMF8   | 84.702<br>25012 | 48.5458374  | 120.8586628 | 2.4895<br>7829  | 1.315901<br>384      | 0.00<br>6472 | 0.05<br>3693 | Up   |
| SLAMF9   | 50.822<br>10463 | 97.36990075 | 4.274308501 | 0.0438<br>97636 | -<br>4.509712<br>927 | 2.39<br>E-11 | 2.82<br>E-09 | Down |
| SLC12A3  | 22.564<br>89783 | 5.27863073  | 39.85116493 | 7.5495<br>26946 | 2.916386<br>248      | 0.00<br>0754 | 0.01<br>0621 | Up   |

|          |                 |             |             |                 |                      |              |              |          |
|----------|-----------------|-------------|-------------|-----------------|----------------------|--------------|--------------|----------|
| SLC12A4  | 2718.3<br>17112 | 4174.570903 | 1262.063321 | 0.3023<br>21688 | -<br>1.725843<br>617 | 1.21<br>E-05 | 0.00<br>0349 | Dow<br>n |
| SLC13A2  | 470.62<br>43772 | 83.11570035 | 858.1330541 | 10.324<br>56023 | 3.368008<br>427      | 8.22<br>E-17 | 2.41<br>E-14 | Up       |
| SLC15A2  | 196.37<br>43706 | 47.05275883 | 345.6959824 | 7.3469<br>86468 | 2.877152<br>617      | 1.03<br>E-10 | 1.08<br>E-08 | Up       |
| SLC16A11 | 726.12<br>96313 | 341.3988474 | 1110.860415 | 3.2538<br>49343 | 1.702147<br>454      | 2.83<br>E-06 | 0.00<br>01   | Up       |
| SLC16A2  | 306.59<br>19582 | 414.2901527 | 198.8937637 | 0.4800<br>83252 | -<br>1.058643<br>488 | 0.00<br>5082 | 0.04<br>5161 | Dow<br>n |
| SLC16A3  | 344.56<br>8567  | 535.2253212 | 153.9118128 | 0.2875<br>6452  | -<br>1.798042<br>408 | 3.39<br>E-06 | 0.00<br>0118 | Dow<br>n |
| SLC16A5  | 326.75<br>2307  | 437.2308928 | 216.2737213 | 0.4946<br>44191 | -<br>1.015536<br>96  | 0.00<br>8493 | 0.06<br>5785 | Dow<br>n |
| SLC17A1  | 10.332<br>54587 | 3.222495701 | 17.44259604 | 5.4127<br>60067 | 2.436364<br>439      | 0.04<br>3178 | 0.20<br>6182 | Up       |
| SLC17A7  | 100.92<br>44206 | 21.21955826 | 180.629283  | 8.5123<br>96006 | 3.089565<br>268      | 2.26<br>E-09 | 1.81<br>E-07 | Up       |
| SLC17A9  | 510.96<br>06193 | 754.6816212 | 267.2396175 | 0.3541<br>09084 | -<br>1.497734<br>242 | 4.92<br>E-05 | 0.00<br>1153 | Dow<br>n |
| SLC19A3  | 23.836<br>96494 | 12.01945372 | 35.65447616 | 2.9663<br>97391 | 1.568711<br>88       | 0.04<br>3332 | 0.20<br>6588 | Up       |
| SLC1A1   | 691.99<br>69635 | 174.7735855 | 1209.220342 | 6.9187<br>82024 | 2.790518<br>09       | 2.93<br>E-11 | 3.41<br>E-09 | Up       |
| SLC1A4   | 563.13<br>18219 | 933.2385633 | 193.0250804 | 0.2068<br>33588 | -<br>2.273457<br>609 | 1.21<br>E-09 | 1.07<br>E-07 | Dow<br>n |
| SLC1A5   | 1642.7<br>75257 | 2544.97773  | 740.5727832 | 0.2909<br>93817 | -<br>1.780939<br>597 | 2.59<br>E-06 | 9.35<br>E-05 | Dow<br>n |
| SLC22A3  | 432.27<br>91281 | 253.991521  | 610.5667351 | 2.4038<br>8629  | 1.265368<br>654      | 0.04<br>8853 | 0.22<br>5223 | Up       |
| SLC22A31 | 107.95<br>46132 | 23.218083   | 192.6911434 | 8.2991<br>8402  | 3.052969<br>497      | 1.88<br>E-09 | 1.56<br>E-07 | Up       |
| SLC23A1  | 34.682<br>28527 | 13.20733926 | 56.15723128 | 4.2519<br>71589 | 2.088131<br>957      | 0.00<br>2693 | 0.02<br>7999 | Up       |
| SLC24A3  | 769.84<br>7263  | 264.3999691 | 1275.294557 | 4.8233<br>53654 | 2.270036<br>594      | 1.26<br>E-09 | 1.09<br>E-07 | Up       |
| SLC25A10 | 1389.5          | 482.7636642 | 2296.300114 | 4.7565          | 2.249922             | 5.65         | 5.15         | Up       |

|          |                 |             |             |                 |                      |              |              |      |
|----------|-----------------|-------------|-------------|-----------------|----------------------|--------------|--------------|------|
|          | 31889           |             |             | 71971           | 208                  | E-10         | E-08         |      |
| SLC25A13 | 207.24<br>37603 | 136.6201515 | 277.867369  | 2.0338<br>68107 | 1.024226<br>126      | 0.01<br>2821 | 0.08<br>8338 | Up   |
| SLC25A15 | 182.96<br>90803 | 258.5687182 | 107.3694425 | 0.4152<br>4529  | -<br>1.267964<br>289 | 0.00<br>21   | 0.02<br>3201 | Down |
| SLC25A21 | 44.969<br>97001 | 66.05608827 | 23.88385174 | 0.3615<br>69272 | -<br>1.467656<br>02  | 0.01<br>4392 | 0.09<br>6273 | Down |
| SLC25A27 | 420.45<br>198   | 276.5700305 | 564.3339295 | 2.0404<br>73903 | 1.028904<br>259      | 0.00<br>601  | 0.05<br>0889 | Up   |
| SLC25A29 | 4083.3<br>20622 | 2698.059712 | 5468.581531 | 2.0268<br>57117 | 1.019244<br>39       | 0.02<br>7991 | 0.15<br>3621 | Up   |
| SLC25A4  | 1316.7<br>69052 | 1893.016775 | 740.5213286 | 0.3911<br>85825 | -<br>1.354074<br>002 | 0.01<br>7957 | 0.11<br>2847 | Down |
| SLC25A48 | 101.94<br>39336 | 2.02959489  | 201.8582723 | 99.457<br>42044 | 6.636007<br>108      | 1.74<br>E-22 | 1.31<br>E-19 | Up   |
| SLC26A10 | 208.90<br>63929 | 311.6453734 | 106.1674124 | 0.3406<br>67378 | -<br>1.553564<br>29  | 0.00<br>1266 | 0.01<br>59   | Down |
| SLC26A2  | 1448.9<br>12104 | 731.955177  | 2165.869032 | 2.9590<br>18667 | 1.565118<br>798      | 7.29<br>E-06 | 0.00<br>0228 | Up   |
| SLC26A6  | 1604.7<br>92803 | 794.4980398 | 2415.087566 | 3.0397<br>65293 | 1.603959<br>934      | 6.24<br>E-06 | 0.00<br>02   | Up   |
| SLC26A9  | 6.6894<br>66213 | 0.880714327 | 12.4982181  | 14.191<br>00124 | 3.826904<br>476      | 0.02<br>1843 | 0.12<br>9595 | Up   |
| SLC27A1  | 2529.1<br>43212 | 1550.750939 | 3507.535485 | 2.2618<br>30314 | 1.177490<br>7        | 0.00<br>0598 | 0.00<br>8838 | Up   |
| SLC27A5  | 240.39<br>76828 | 130.3726325 | 350.4227331 | 2.6878<br>55008 | 1.426455<br>316      | 0.00<br>0341 | 0.00<br>569  | Up   |
| SLC28A3  | 6791.2<br>31982 | 3885.395626 | 9697.068337 | 2.4957<br>73731 | 1.319487<br>144      | 0.02<br>7622 | 0.15<br>2409 | Up   |
| SLC2A10  | 225.41<br>70231 | 324.7008382 | 126.133208  | 0.3884<br>59755 | -<br>1.364162<br>954 | 0.00<br>259  | 0.02<br>7215 | Down |
| SLC2A11  | 32.797<br>65316 | 12.62586132 | 52.969445   | 4.1953<br>13385 | 2.068778<br>582      | 0.00<br>4221 | 0.03<br>9075 | Up   |
| SLC2A13  | 57.611<br>65763 | 89.34974693 | 25.87356833 | 0.2895<br>76291 | -<br>1.787984<br>607 | 0.00<br>1511 | 0.01<br>8119 | Down |
| SLC2A3   | 2518.0<br>11464 | 4315.888553 | 720.1343748 | 0.1668<br>56573 | -<br>2.583319<br>572 | 7.07<br>E-13 | 1.08<br>E-10 | Down |

|          |                 |             |             |                 |                      |              |              |      |
|----------|-----------------|-------------|-------------|-----------------|----------------------|--------------|--------------|------|
| SLC2A5   | 312.30<br>33018 | 89.5216656  | 535.0849379 | 5.9771<br>55746 | 2.579459<br>135      | 3.46<br>E-10 | 3.27<br>E-08 | Up   |
| SLC2A9   | 69.774<br>43717 | 101.5790663 | 37.96980804 | 0.3737<br>956   | -<br>1.419678<br>508 | 0.01<br>6475 | 0.10<br>5912 | Down |
| SLC30A4  | 982.72<br>47816 | 1337.367882 | 628.0816816 | 0.4696<br>40172 | -<br>1.090372<br>277 | 0.04<br>0624 | 0.19<br>7729 | Down |
| SLC34A3  | 64.849<br>06019 | 27.82944573 | 101.8686747 | 3.6604<br>63656 | 1.872026<br>401      | 0.00<br>0642 | 0.00<br>9303 | Up   |
| SLC35D1  | 87.570<br>99762 | 128.4974178 | 46.64457739 | 0.3630<br>00115 | -<br>1.461958<br>091 | 0.00<br>2862 | 0.02<br>9374 | Down |
| SLC35E4  | 109.40<br>52767 | 155.6502262 | 63.16032723 | 0.4057<br>83716 | -<br>1.301217<br>122 | 0.00<br>53   | 0.04<br>6487 | Down |
| SLC35F1  | 240.36<br>24806 | 158.0247756 | 322.7001856 | 2.0420<br>86023 | 1.030043<br>641      | 0.01<br>51   | 0.09<br>9614 | Up   |
| SLC35G2  | 26.367<br>83708 | 48.12183513 | 4.613839029 | 0.0958<br>78285 | -<br>3.382652<br>085 | 2.11<br>E-05 | 0.00<br>0564 | Down |
| SLC37A1  | 1631.9<br>98859 | 969.0995828 | 2294.898135 | 2.3680<br>72566 | 1.243713<br>291      | 0.04<br>5131 | 0.21<br>2818 | Up   |
| SLC37A2  | 402.11<br>49878 | 170.9785261 | 633.2514495 | 3.7036<br>89954 | 1.888963<br>332      | 6.92<br>E-07 | 2.88<br>E-05 | Up   |
| SLC38A2  | 7998.4<br>57494 | 11361.67995 | 4635.235038 | 0.4079<br>70921 | -<br>1.293461<br>769 | 0.02<br>2531 | 0.13<br>2463 | Down |
| SLC38A5  | 140.69<br>33099 | 266.7968267 | 14.58979307 | 0.0546<br>85032 | -<br>4.192710<br>181 | 0.00<br>0613 | 0.00<br>8971 | Down |
| SLC38A7  | 824.07<br>11064 | 548.6538568 | 1099.488356 | 2.0039<br>74532 | 1.002864<br>174      | 0.00<br>5284 | 0.04<br>6369 | Up   |
| SLC39A11 | 1496.2<br>56639 | 803.3312379 | 2189.182041 | 2.7251<br>29981 | 1.446325<br>044      | 4.70<br>E-05 | 0.00<br>1108 | Up   |
| SLC39A12 | 62.972<br>32995 | 124.8623638 | 1.082296068 | 0.0086<br>67913 | -<br>6.850099<br>663 | 7.92<br>E-05 | 0.00<br>1717 | Down |
| SLC39A13 | 1429.1<br>15403 | 1921.698654 | 936.5321512 | 0.4873<br>46    | -<br>1.036981<br>693 | 0.00<br>3137 | 0.03<br>1538 | Down |
| SLC39A2  | 14.758<br>82315 | 5.785018264 | 23.73262804 | 4.1024<br>29233 | 2.036478<br>447      | 0.03<br>7816 | 0.18<br>8197 | Up   |
| SLC39A5  | 35.667          | 17.28060434 | 54.05508701 | 3.1280          | 1.645276             | 0.01         | 0.09         | Up   |

|         |                 |             |             |                 |                      |              |              |      |
|---------|-----------------|-------------|-------------|-----------------|----------------------|--------------|--------------|------|
|         | 84568           |             |             | 78506           | 721                  | 3212         | 0312         |      |
| SLC3A2  | 3018.1<br>55283 | 1812.452191 | 4223.858375 | 2.3304<br>66092 | 1.220618<br>522      | 0.00<br>04   | 0.00<br>644  | Up   |
| SLC41A2 | 681.64<br>08446 | 1127.633496 | 235.6481933 | 0.2089<br>75872 | -<br>2.258591<br>713 | 0.00<br>5664 | 0.04<br>8736 | Down |
| SLC44A1 | 2220.3<br>08143 | 1459.619682 | 2980.996605 | 2.0423<br>10502 | 1.030202<br>223      | 0.00<br>2659 | 0.02<br>7715 | Up   |
| SLC44A3 | 221.94<br>90397 | 63.77650552 | 380.1215738 | 5.9602<br>13259 | 2.575363<br>952      | 2.07<br>E-09 | 1.68<br>E-07 | Up   |
| SLC44A4 | 136.18<br>40843 | 11.76311236 | 260.6050561 | 22.154<br>43057 | 4.469523<br>341      | 1.58<br>E-17 | 4.88<br>E-15 | Up   |
| SLC46A1 | 178.48<br>06721 | 78.72888938 | 278.2324549 | 3.5340<br>57918 | 1.821325<br>684      | 2.10<br>E-05 | 0.00<br>0562 | Up   |
| SLC46A2 | 149.99<br>23091 | 80.71671445 | 219.2679038 | 2.7165<br>11757 | 1.441755<br>291      | 0.00<br>0782 | 0.01<br>0942 | Up   |
| SLC4A11 | 870.53<br>15007 | 1405.354661 | 335.7083408 | 0.2388<br>78022 | -<br>2.065653<br>973 | 0.00<br>3759 | 0.03<br>5821 | Down |
| SLC4A4  | 735.55<br>34424 | 1287.671059 | 183.4358254 | 0.1424<br>55501 | -<br>2.811416<br>766 | 0.00<br>8668 | 0.06<br>677  | Down |
| SLC4A5  | 49.511<br>64292 | 23.16548798 | 75.85779786 | 3.2746<br>03925 | 1.711320<br>418      | 0.00<br>5157 | 0.04<br>5561 | Up   |
| SLC5A1  | 862.30<br>95295 | 385.1373841 | 1339.481675 | 3.4779<br>3211  | 1.798229<br>771      | 8.51<br>E-06 | 0.00<br>026  | Up   |
| SLC6A12 | 17.700<br>72195 | 3.421226766 | 31.98021714 | 9.3475<br>87671 | 3.224594<br>097      | 0.00<br>6094 | 0.05<br>1408 | Up   |
| SLC6A14 | 475.93<br>93341 | 281.606328  | 670.2723403 | 2.3801<br>74995 | 1.251067<br>647      | 0.00<br>2387 | 0.02<br>5601 | Up   |
| SLC6A15 | 15.754<br>19503 | 6.917543934 | 24.59084612 | 3.5548<br>52179 | 1.829789<br>57       | 0.04<br>4735 | 0.21<br>1389 | Up   |
| SLC6A17 | 594.67<br>74815 | 1105.430552 | 83.92441106 | 0.0759<br>20112 | -<br>3.719374<br>074 | 0.04<br>323  | 0.20<br>6323 | Down |
| SLC6A2  | 258.36<br>71978 | 468.9091402 | 47.82525538 | 0.1019<br>92585 | -<br>3.293463<br>823 | 6.08<br>E-05 | 0.00<br>1393 | Down |
| SLC6A4  | 89.774<br>29248 | 162.5710573 | 16.97752764 | 0.1044<br>31428 | -<br>3.259372<br>15  | 0.00<br>0808 | 0.01<br>1243 | Down |
| SLC6A9  | 329.17<br>89216 | 463.1312781 | 195.2265651 | 0.4215<br>36127 | -<br>1.246271<br>816 | 0.00<br>1152 | 0.01<br>4733 | Down |

|         |                 |             |             |                 |                      |              |              |          |
|---------|-----------------|-------------|-------------|-----------------|----------------------|--------------|--------------|----------|
| SLC7A10 | 49.911<br>75247 | 81.81555981 | 18.00794514 | 0.2201<br>04161 | -<br>2.183741<br>677 | 0.01<br>4002 | 0.09<br>4498 | Dow<br>n |
| SLC7A2  | 1456.8<br>40469 | 2267.293034 | 646.3879033 | 0.2850<br>92352 | -<br>1.810498<br>758 | 0.03<br>8063 | 0.18<br>9095 | Dow<br>n |
| SLC7A8  | 416.39<br>27777 | 199.6688964 | 633.116659  | 3.1708<br>32666 | 1.664861<br>744      | 0.00<br>1523 | 0.01<br>819  | Up       |
| SLC8A2  | 46.610<br>71066 | 83.37587346 | 9.845547861 | 0.1180<br>86293 | -<br>3.082086<br>577 | 0.04<br>0852 | 0.19<br>82   | Dow<br>n |
| SLC9A4  | 3.3640<br>65144 | 0           | 6.728130287 | Inf             | Inf                  | 0.04<br>9447 | 0.22<br>6508 | Up       |
| SLC9A7  | 423.07<br>09803 | 221.2029799 | 624.9389807 | 2.8251<br>83372 | 1.498344<br>51       | 6.71<br>E-05 | 0.00<br>1506 | Up       |
| SLC9C2  | 10.355<br>36548 | 2.879239062 | 17.8314919  | 6.1931<br>26558 | 2.630667<br>928      | 0.03<br>0417 | 0.16<br>2752 | Up       |
| SLCO1A2 | 152.40<br>64706 | 74.40673249 | 230.4062086 | 3.0965<br>77432 | 1.630674<br>522      | 0.00<br>0261 | 0.00<br>4546 | Up       |
| SLCO2A1 | 433.86<br>7152  | 665.9359694 | 201.7983345 | 0.3030<br>29636 | -<br>1.722469<br>199 | 0.02<br>5351 | 0.14<br>3647 | Dow<br>n |
| SLCO4A1 | 262.05<br>12142 | 459.0015316 | 65.10089673 | 0.1418<br>31546 | -<br>2.817749<br>647 | 0.00<br>3939 | 0.03<br>6943 | Dow<br>n |
| SLCO4C1 | 110.77<br>42285 | 27.17336265 | 194.3750943 | 7.1531<br>48353 | 2.838578<br>363      | 1.42<br>E-06 | 5.52<br>E-05 | Up       |
| SLIT1   | 96.167<br>56215 | 21.08749752 | 171.2476268 | 8.1208<br>13133 | 3.021624<br>191      | 9.07<br>E-09 | 6.29<br>E-07 | Up       |
| SLIT3   | 4111.7<br>15264 | 6522.070306 | 1701.360223 | 0.2608<br>61988 | -<br>1.938641<br>363 | 0.00<br>6024 | 0.05<br>099  | Dow<br>n |
| SLITRK2 | 513.57<br>9284  | 195.4783742 | 831.6801938 | 4.2545<br>89272 | 2.089019<br>864      | 3.01<br>E-08 | 1.76<br>E-06 | Up       |
| SLITRK4 | 42.632<br>72039 | 79.68569379 | 5.579747003 | 0.0700<br>21942 | -<br>3.836049<br>122 | 2.00<br>E-06 | 7.40<br>E-05 | Dow<br>n |
| SLITRK6 | 91.766<br>05891 | 40.73675394 | 142.7953639 | 3.5053<br>20136 | 1.809546<br>21       | 0.00<br>0234 | 0.00<br>4153 | Up       |
| SLMAP   | 4243.4<br>41265 | 6914.147054 | 1572.735476 | 0.2274<br>66304 | -<br>2.136275<br>249 | 0.04<br>6515 | 0.21<br>7375 | Dow<br>n |
| SMAD7   | 590.70<br>24697 | 827.9784959 | 353.4264434 | 0.4268<br>54617 | -<br>1.228183        | 0.00<br>5408 | 0.04<br>7156 | Dow<br>n |



|         |                 |             |             |                 |                      |              |              |          |
|---------|-----------------|-------------|-------------|-----------------|----------------------|--------------|--------------|----------|
|         |                 |             |             |                 | 312                  |              |              |          |
| SMAD9   | 357.66<br>39675 | 587.0129843 | 128.3149507 | 0.2185<br>89629 | -<br>2.193703<br>139 | 0.03<br>0378 | 0.16<br>2715 | Dow<br>n |
| SMARCD3 | 1832.0<br>3539  | 2712.85213  | 951.2186504 | 0.3506<br>34168 | -<br>1.511961<br>506 | 0.03<br>7483 | 0.18<br>7364 | Dow<br>n |
| SMCO3   | 67.172<br>10738 | 24.30190371 | 110.042311  | 4.5281<br>35423 | 2.178917<br>106      | 6.39<br>E-05 | 0.00<br>1449 | Up       |
| SMIM10  | 157.55<br>50724 | 212.9714755 | 102.1386692 | 0.4795<br>88494 | -<br>1.060131<br>048 | 0.01<br>2166 | 0.08<br>5015 | Dow<br>n |
| SMIM14  | 3355.2<br>94156 | 4838.028644 | 1872.559668 | 0.3870<br>50141 | -<br>1.369407<br>621 | 8.26<br>E-05 | 0.00<br>178  | Dow<br>n |
| SMKR1   | 197.78<br>3913  | 50.87113835 | 344.6966876 | 6.7758<br>79189 | 2.760408<br>152      | 5.57<br>E-05 | 0.00<br>1285 | Up       |
| SMOC1   | 1286.4<br>77559 | 2056.736505 | 516.2186134 | 0.2509<br>89182 | -<br>1.994302<br>911 | 1.98<br>E-08 | 1.22<br>E-06 | Dow<br>n |
| SMPD2   | 585.74<br>44151 | 370.4857685 | 801.0030617 | 2.1620<br>34631 | 1.112389<br>632      | 0.00<br>2492 | 0.02<br>6366 | Up       |
| SMPD3   | 73.546<br>59209 | 36.71623856 | 110.3769456 | 3.0062<br>16048 | 1.587948<br>695      | 0.00<br>3036 | 0.03<br>0788 | Up       |
| SMPDL3B | 38.203<br>86952 | 63.3813902  | 13.02634885 | 0.2055<br>23243 | -<br>2.282626<br>536 | 0.01<br>1294 | 0.08<br>0472 | Dow<br>n |
| SMYD2   | 367.35<br>76876 | 490.9492215 | 243.7661536 | 0.4965<br>20094 | -<br>1.010075<br>99  | 0.00<br>9183 | 0.06<br>9537 | Dow<br>n |
| SNAI1   | 278.93<br>10452 | 406.6568328 | 151.2052576 | 0.3718<br>25199 | -<br>1.427303<br>55  | 0.00<br>5812 | 0.04<br>982  | Dow<br>n |
| SNAI2   | 1468.5<br>46267 | 1996.281484 | 940.8110503 | 0.4712<br>8176  | -<br>1.085338<br>25  | 0.03<br>0869 | 0.16<br>4437 | Dow<br>n |
| SNRK    | 685.74<br>20273 | 984.3988784 | 387.0851762 | 0.3932<br>19847 | -<br>1.346591<br>955 | 0.00<br>0187 | 0.00<br>3493 | Dow<br>n |
| SNTB2   | 173.11<br>44853 | 253.4376581 | 92.79131243 | 0.3661<br>30721 | -<br>1.449569<br>265 | 0.00<br>06   | 0.00<br>8838 | Dow<br>n |
| SNX7    | 437.88<br>72173 | 598.705372  | 277.0690626 | 0.4627<br>80318 | -<br>1.111600        | 0.00<br>2819 | 0.02<br>9059 | Dow<br>n |

|         |                 |             |             |                 |                      |              |              |      |
|---------|-----------------|-------------|-------------|-----------------|----------------------|--------------|--------------|------|
|         |                 |             |             |                 | 586                  |              |              |      |
| SOD2    | 4818.7<br>84932 | 2707.403786 | 6930.166079 | 2.5597<br>0909  | 1.355979<br>858      | 0.02<br>0994 | 0.12<br>6245 | Up   |
| SOD3    | 923.60<br>22148 | 1419.156014 | 428.0484156 | 0.3016<br>21817 | -<br>1.729187<br>309 | 0.00<br>6862 | 0.05<br>6114 | Down |
| SORBS1  | 5991.4<br>90757 | 10597.27851 | 1385.703008 | 0.1307<br>60271 | -<br>2.935003<br>824 | 0.01<br>0933 | 0.07<br>8801 | Down |
| SORL1   | 2313.4<br>98234 | 1124.567227 | 3502.429242 | 3.1144<br>68533 | 1.638985<br>996      | 0.00<br>0673 | 0.00<br>9667 | Up   |
| SORT1   | 2031.9<br>27888 | 949.239436  | 3114.61634  | 3.2811<br>704   | 1.714210<br>519      | 1.09<br>E-06 | 4.35<br>E-05 | Up   |
| SOWAHA  | 85.922<br>28862 | 43.84983898 | 127.9947383 | 2.9189<br>32914 | 1.545441<br>054      | 0.00<br>199  | 0.02<br>2195 | Up   |
| SOX10   | 5206.7<br>11609 | 2622.339771 | 7791.083446 | 2.9710<br>42704 | 1.570969<br>342      | 0.00<br>4312 | 0.03<br>9803 | Up   |
| SOX18   | 765.94<br>52383 | 1036.924537 | 494.9659398 | 0.4773<br>40368 | -<br>1.066909<br>747 | 0.00<br>8986 | 0.06<br>8777 | Down |
| SOX9    | 277.59<br>45473 | 115.0109696 | 440.1781251 | 3.8272<br>70796 | 1.936315<br>982      | 2.45<br>E-06 | 8.90<br>E-05 | Up   |
| SPAG6   | 15.699<br>15146 | 1.981044628 | 29.41725829 | 14.849<br>36678 | 3.892329<br>507      | 0.00<br>0379 | 0.00<br>6182 | Up   |
| SPARC   | 208129<br>.9539 | 361449.9616 | 54809.94618 | 0.1516<br>39098 | -<br>2.721286<br>314 | 0.00<br>2451 | 0.02<br>6042 | Down |
| SPATA20 | 809.02<br>47825 | 1183.847412 | 434.2021529 | 0.3667<br>72059 | -<br>1.447044<br>357 | 0.00<br>856  | 0.06<br>6106 | Down |
| SPDEF   | 246.34<br>6589  | 39.83679434 | 452.8563836 | 11.367<br>79179 | 3.506880<br>131      | 1.44<br>E-15 | 3.48<br>E-13 | Up   |
| SPEF2   | 31.919<br>8941  | 17.25859422 | 46.58119398 | 2.6990<br>1438  | 1.432432<br>663      | 0.03<br>7629 | 0.18<br>768  | Up   |
| SPHK1   | 904.89<br>76545 | 576.0544608 | 1233.740848 | 2.1417<br>08696 | 1.098762<br>266      | 0.00<br>2259 | 0.02<br>4541 | Up   |
| SPHKAP  | 109.39<br>40964 | 24.03228169 | 194.7559111 | 8.1039<br>29274 | 3.018621<br>583      | 3.14<br>E-09 | 2.41<br>E-07 | Up   |
| SPINT1  | 2175.5<br>70381 | 430.252148  | 3920.888614 | 9.1130<br>01835 | 3.187926<br>358      | 1.57<br>E-17 | 4.88<br>E-15 | Up   |
| SPINT2  | 9017.5<br>02098 | 3211.569536 | 14823.43466 | 4.6156<br>35593 | 2.206529<br>327      | 4.54<br>E-10 | 4.18<br>E-08 | Up   |
| SPIRE2  | 167.80<br>84114 | 102.3437654 | 233.2730573 | 2.2793<br>0892  | 1.188596<br>469      | 0.00<br>4411 | 0.04<br>0407 | Up   |

|        |                 |             |             |                 |                      |              |              |      |
|--------|-----------------|-------------|-------------|-----------------|----------------------|--------------|--------------|------|
| SPN    | 393.14<br>4198  | 219.3029824 | 566.9854136 | 2.5853<br>97643 | 1.370386<br>189      | 0.00<br>0227 | 0.00<br>4068 | Up   |
| SPON1  | 5741.3<br>55728 | 10844.63292 | 638.0785331 | 0.0588<br>38186 | -<br>4.087103<br>412 | 0.00<br>26   | 0.02<br>7269 | Down |
| SPON2  | 1768.9<br>71001 | 2522.988105 | 1014.953897 | 0.4022<br>82474 | -<br>1.313719<br>208 | 0.00<br>0135 | 0.00<br>2649 | Down |
| SPP1   | 26363.<br>30548 | 2127.398793 | 50599.21216 | 23.784<br>54493 | 4.571952<br>517      | 2.58<br>E-10 | 2.52<br>E-08 | Up   |
| SPP2   | 106.61<br>52226 | 171.6166941 | 41.613751   | 0.2424<br>80787 | -<br>2.044057<br>657 | 1.22<br>E-05 | 0.00<br>0352 | Down |
| SPRY3  | 19.573<br>16803 | 30.58163932 | 8.564696743 | 0.2800<br>60093 | -<br>1.836191<br>675 | 0.02<br>7693 | 0.15<br>2632 | Down |
| SPSB1  | 1536.0<br>10223 | 2190.970847 | 881.0495998 | 0.4021<br>27487 | -<br>1.314275<br>143 | 0.04<br>6602 | 0.21<br>7602 | Down |
| SPSB2  | 230.78<br>9461  | 146.2856896 | 315.2932323 | 2.1553<br>25194 | 1.107905<br>558      | 0.00<br>5709 | 0.04<br>901  | Up   |
| SPSB4  | 77.471<br>55259 | 131.488523  | 23.45458216 | 0.1783<br>7741  | -<br>2.486995<br>175 | 0.02<br>4551 | 0.14<br>0432 | Down |
| SPTA1  | 7.2176<br>43055 | 13.35299004 | 1.082296068 | 0.0810<br>52713 | -<br>3.624995<br>715 | 0.01<br>4284 | 0.09<br>582  | Down |
| SPTBN1 | 16665.<br>49433 | 23277.96567 | 10053.02299 | 0.4318<br>68624 | -<br>1.211335<br>59  | 0.00<br>0339 | 0.00<br>5667 | Down |
| SPTBN5 | 245.08<br>68594 | 364.3244956 | 125.8492231 | 0.3454<br>31681 | -<br>1.533527<br>689 | 0.00<br>0134 | 0.00<br>2624 | Down |
| SPTSSA | 1401.3<br>03155 | 1957.875309 | 844.7310011 | 0.4314<br>52911 | -<br>1.212724<br>984 | 0.04<br>9456 | 0.22<br>6508 | Down |
| SPTSSB | 6.9514<br>11032 | 1.294531351 | 12.60829071 | 9.7396<br>5652  | 3.283870<br>895      | 0.03<br>4757 | 0.17<br>9111 | Up   |
| SRCIN1 | 290.47<br>94412 | 60.82831655 | 520.1305659 | 8.5507<br>96659 | 3.096058<br>839      | 8.66<br>E-08 | 4.49<br>E-06 | Up   |
| SRD5A1 | 1010.2<br>28758 | 526.8600642 | 1493.597452 | 2.8349<br>03523 | 1.503299<br>638      | 0.00<br>0531 | 0.00<br>8069 | Up   |
| SRL    | 318.18<br>69456 | 525.997643  | 110.3762481 | 0.2098<br>41716 | -<br>2.252626        | 0.00<br>1473 | 0.01<br>785  | Down |

|         |                 |             |             |                 |                      |              |              |          |
|---------|-----------------|-------------|-------------|-----------------|----------------------|--------------|--------------|----------|
|         |                 |             |             |                 | 583                  |              |              |          |
| SRPX    | 823.82<br>18644 | 1349.665544 | 297.9781852 | 0.2207<br>79279 | -<br>2.179323<br>321 | 2.46<br>E-09 | 1.95<br>E-07 | Dow<br>n |
| SRPX2   | 392.22<br>73612 | 678.3152434 | 106.139479  | 0.1564<br>75149 | -<br>2.675994<br>541 | 1.67<br>E-10 | 1.69<br>E-08 | Dow<br>n |
| SSC5D   | 1190.1<br>92157 | 1731.991616 | 648.3926978 | 0.3743<br>62492 | -<br>1.417492<br>198 | 0.02<br>5212 | 0.14<br>3124 | Dow<br>n |
| SSPN    | 182.64<br>51013 | 299.1806691 | 66.10953348 | 0.2209<br>686   | -<br>2.178086<br>723 | 0.01<br>0813 | 0.07<br>8243 | Dow<br>n |
| SSR3    | 2424.3<br>84204 | 3359.20856  | 1489.559848 | 0.4434<br>25831 | -<br>1.173235<br>28  | 0.00<br>0624 | 0.00<br>9095 | Dow<br>n |
| SSTR1   | 46.126<br>11681 | 69.84176597 | 22.41046765 | 0.3208<br>74871 | -<br>1.639917<br>284 | 0.00<br>6842 | 0.05<br>5977 | Dow<br>n |
| ST14    | 1748.6<br>33071 | 693.7991884 | 2803.466953 | 4.0407<br>46948 | 2.014622<br>005      | 6.47<br>E-07 | 2.73<br>E-05 | Up       |
| ST18    | 36.598<br>46185 | 8.941483594 | 64.2554401  | 7.1862<br>16854 | 2.845232<br>471      | 4.82<br>E-05 | 0.00<br>1133 | Up       |
| ST3GAL2 | 1345.8<br>67972 | 1835.200023 | 856.5359218 | 0.4667<br>26194 | -<br>1.099351<br>657 | 0.00<br>1481 | 0.01<br>7892 | Dow<br>n |
| ST3GAL3 | 593.80<br>85316 | 836.4712314 | 351.1458318 | 0.4197<br>94272 | -<br>1.252245<br>613 | 0.00<br>1245 | 0.01<br>5646 | Dow<br>n |
| ST8SIA4 | 163.55<br>94145 | 218.829819  | 108.28901   | 0.4948<br>54908 | -<br>1.014922<br>507 | 0.01<br>6497 | 0.10<br>5979 | Dow<br>n |
| ST8SIA5 | 45.041<br>43787 | 65.3119647  | 24.77091103 | 0.3792<br>70646 | -<br>1.398700<br>378 | 0.04<br>3272 | 0.20<br>6362 | Dow<br>n |
| STAB1   | 4302.7<br>83398 | 6758.843172 | 1846.723623 | 0.2732<br>30725 | -<br>1.871808<br>368 | 0.00<br>1812 | 0.02<br>0726 | Dow<br>n |
| STAC    | 449.37<br>90246 | 636.8592452 | 261.898804  | 0.4112<br>34988 | -<br>1.281965<br>081 | 0.00<br>049  | 0.00<br>7617 | Dow<br>n |
| STAG3   | 213.95<br>67255 | 127.5893767 | 300.3240743 | 2.3538<br>32914 | 1.235011<br>915      | 0.00<br>3151 | 0.03<br>1606 | Up       |
| STAM    | 446.10          | 608.114635  | 284.1031397 | 0.4671          | -                    | 0.00         | 0.03         | Dow      |

|         |                 |             |             |                 |                      |              |              |      |
|---------|-----------------|-------------|-------------|-----------------|----------------------|--------------|--------------|------|
|         | 88874           |             |             | 86815           | 1.097928<br>535      | 3064         | 0974         | n    |
| STAP2   | 682.66<br>26554 | 270.1186052 | 1095.206706 | 4.0545<br>40059 | 2.019538<br>267      | 8.08<br>E-08 | 4.22<br>E-06 | Up   |
| STARD10 | 255.97<br>91057 | 149.676883  | 362.2813283 | 2.4204<br>2272  | 1.275259<br>032      | 0.02<br>2213 | 0.13<br>0933 | Up   |
| STARD13 | 806.17<br>25159 | 1215.337571 | 397.0074605 | 0.3266<br>64352 | -<br>1.614119<br>068 | 6.70<br>E-06 | 0.00<br>0212 | Down |
| STARD9  | 2301.4<br>23489 | 3261.322213 | 1341.524765 | 0.4113<br>43828 | -<br>1.281583<br>297 | 0.00<br>0225 | 0.00<br>4046 | Down |
| STC1    | 256.70<br>16942 | 410.0871736 | 103.3162147 | 0.2519<br>37201 | -<br>1.988863<br>928 | 8.03<br>E-07 | 3.31<br>E-05 | Down |
| STC2    | 230.88<br>47596 | 34.69615981 | 427.0733593 | 12.308<br>95182 | 3.621636<br>008      | 2.20<br>E-16 | 6.05<br>E-14 | Up   |
| STEAP1  | 150.33<br>47942 | 237.4423412 | 63.22724715 | 0.2662<br>84635 | -<br>1.908958<br>91  | 1.44<br>E-05 | 0.00<br>0402 | Down |
| STK17B  | 3327.9<br>7769  | 1539.358822 | 5116.596559 | 3.3238<br>49181 | 1.732854<br>921      | 1.79<br>E-06 | 6.78<br>E-05 | Up   |
| STK31   | 71.807<br>68176 | 39.4847579  | 104.1306056 | 2.6372<br>35509 | 1.399026<br>412      | 0.00<br>6396 | 0.05<br>3272 | Up   |
| STK33   | 29.734<br>73676 | 14.81065229 | 44.65882122 | 3.0153<br>17648 | 1.592309<br>99       | 0.02<br>5596 | 0.14<br>4542 | Up   |
| STK36   | 472.84<br>61476 | 304.6641582 | 641.0281371 | 2.1040<br>48408 | 1.073167<br>897      | 0.00<br>3528 | 0.03<br>4287 | Up   |
| STK38   | 2877.8<br>24283 | 4015.380685 | 1740.267881 | 0.4334<br>00471 | -<br>1.206227<br>373 | 0.00<br>1999 | 0.02<br>2252 | Down |
| STMND1  | 17.763<br>63069 | 6.727872899 | 28.79938848 | 4.2806<br>08286 | 2.097815<br>822      | 0.01<br>8782 | 0.11<br>6441 | Up   |
| STOM    | 3028.0<br>94092 | 4122.732984 | 1933.4552   | 0.4689<br>74151 | -<br>1.092419<br>689 | 0.00<br>1425 | 0.01<br>7383 | Down |
| STRA6   | 1017.5<br>15947 | 446.2142787 | 1588.817615 | 3.5606<br>60629 | 1.832144<br>937      | 6.05<br>E-07 | 2.59<br>E-05 | Up   |
| STRC    | 12.747<br>70907 | 3.44323689  | 22.05218125 | 6.4044<br>91459 | 2.679084<br>02       | 0.01<br>2327 | 0.08<br>5616 | Up   |
| STX19   | 139.48<br>76981 | 63.61805933 | 215.3573368 | 3.3851<br>60426 | 1.759224<br>206      | 0.00<br>0281 | 0.00<br>483  | Up   |
| STX2    | 735.84<br>80672 | 1040.772891 | 430.9232436 | 0.4140<br>41572 | -<br>1.272152        | 0.00<br>0913 | 0.01<br>2332 | Down |

|         |                 |             |             |                 |                      |              |              |          |
|---------|-----------------|-------------|-------------|-----------------|----------------------|--------------|--------------|----------|
|         |                 |             |             |                 | 466                  |              |              |          |
| STXBP1  | 1100.4<br>99721 | 1543.674335 | 657.3251059 | 0.4258<br>1851  | -<br>1.231689<br>43  | 0.00<br>0581 | 0.00<br>8652 | Dow<br>n |
| STXBP2  | 693.38<br>45238 | 454.9655901 | 931.8034574 | 2.0480<br>74575 | 1.034268<br>248      | 0.00<br>4631 | 0.04<br>2021 | Up       |
| STXBP6  | 420.97<br>48731 | 655.8930889 | 186.0566572 | 0.2836<br>69184 | -<br>1.817718<br>662 | 0.00<br>0674 | 0.00<br>9667 | Dow<br>n |
| SUCNR1  | 70.726<br>88119 | 129.2875027 | 12.16625967 | 0.0941<br>02364 | -<br>3.409625<br>22  | 0.00<br>0249 | 0.00<br>4373 | Dow<br>n |
| SULF1   | 1648.4<br>00681 | 3049.477932 | 247.3234299 | 0.0811<br>03532 | -<br>3.624091<br>452 | 9.00<br>E-05 | 0.00<br>1913 | Dow<br>n |
| SULT1A1 | 4999.9<br>09154 | 6887.405055 | 3112.413254 | 0.4518<br>99261 | -<br>1.145926<br>897 | 0.00<br>0779 | 0.01<br>0916 | Dow<br>n |
| SULT1B1 | 150.15<br>05628 | 219.7871087 | 80.51401693 | 0.3663<br>27295 | -<br>1.448794<br>896 | 0.00<br>0753 | 0.01<br>0621 | Dow<br>n |
| SULT1C4 | 237.20<br>26277 | 105.6241808 | 368.7810746 | 3.4914<br>45537 | 1.803824<br>468      | 0.00<br>1004 | 0.01<br>3273 | Up       |
| SULT2B1 | 27.416<br>71584 | 4.125220151 | 50.70821153 | 12.292<br>24373 | 3.619676<br>373      | 1.16<br>E-05 | 0.00<br>0338 | Up       |
| SUOX    | 950.28<br>17955 | 1383.983247 | 516.5803438 | 0.3732<br>56212 | -<br>1.421761<br>825 | 6.58<br>E-05 | 0.00<br>1482 | Dow<br>n |
| SUSD1   | 153.61<br>80711 | 215.0156893 | 92.2204529  | 0.4289<br>01041 | -<br>1.221283<br>278 | 0.00<br>4063 | 0.03<br>7847 | Dow<br>n |
| SUSD3   | 214.45<br>43815 | 94.60780214 | 334.300961  | 3.5335<br>45367 | 1.821116<br>432      | 1.91<br>E-05 | 0.00<br>0518 | Up       |
| SVEP1   | 7064.7<br>18005 | 12840.04026 | 1289.395747 | 0.1004<br>19915 | -<br>3.315882<br>691 | 0.03<br>9301 | 0.19<br>3574 | Dow<br>n |
| SYBU    | 265.17<br>27081 | 135.9177686 | 394.4276476 | 2.9019<br>57938 | 1.537026<br>609      | 0.00<br>0106 | 0.00<br>2162 | Up       |
| SYDE1   | 832.99<br>60309 | 1186.162825 | 479.8292372 | 0.4045<br>22235 | -<br>1.305709<br>09  | 0.00<br>0262 | 0.00<br>4554 | Dow<br>n |
| SYN1    | 53.557<br>67253 | 86.30947271 | 20.80587234 | 0.2410<br>61284 | -<br>2.052528<br>129 | 0.03<br>5114 | 0.18<br>0337 | Dow<br>n |

|          |                 |             |             |                 |                      |              |              |      |
|----------|-----------------|-------------|-------------|-----------------|----------------------|--------------|--------------|------|
| SYNC     | 1970.3<br>47446 | 3667.389079 | 273.3058143 | 0.0745<br>23267 | -<br>3.746165<br>275 | 0.01<br>3734 | 0.09<br>3145 | Down |
| SYNDIG1L | 22.479<br>59293 | 8.598226955 | 36.36095891 | 4.2288<br>9034  | 2.080279<br>15       | 0.01<br>0518 | 0.07<br>6752 | Up   |
| SYNGR1   | 629.83<br>51609 | 301.1137733 | 958.5565485 | 3.1833<br>69986 | 1.670554<br>843      | 7.15<br>E-06 | 0.00<br>0225 | Up   |
| SYNGR2   | 1718.3<br>53987 | 1057.551862 | 2379.156112 | 2.2496<br>82685 | 1.169721<br>525      | 0.00<br>0842 | 0.01<br>1602 | Up   |
| SYNGR3   | 88.200<br>0801  | 57.00166368 | 119.3984965 | 2.0946<br>49328 | 1.066708<br>738      | 0.02<br>6957 | 0.14<br>962  | Up   |
| SYNM     | 10510.<br>61305 | 18316.15564 | 2705.070466 | 0.1476<br>87676 | -<br>2.759378<br>648 | 0.03<br>7056 | 0.18<br>62   | Down |
| SYNPO2   | 6211.5<br>77445 | 11352.87219 | 1070.282705 | 0.0942<br>74179 | -<br>3.406993<br>508 | 0.00<br>9586 | 0.07<br>1823 | Down |
| SYT1     | 1024.8<br>54367 | 183.1123677 | 1866.596366 | 10.193<br>72088 | 3.349608<br>85       | 0.00<br>0178 | 0.00<br>3364 | Up   |
| SYT15    | 90.137<br>22    | 125.6270338 | 54.64740622 | 0.4349<br>97186 | -<br>1.200922<br>026 | 0.01<br>5158 | 0.09<br>9836 | Down |
| SYT2     | 41.204<br>06744 | 19.93569742 | 62.47243746 | 3.1336<br>97114 | 1.647865<br>744      | 0.01<br>2812 | 0.08<br>831  | Up   |
| SYT3     | 111.83<br>8676  | 70.25931837 | 153.4180336 | 2.1835<br>96955 | 1.126706<br>59       | 0.01<br>4057 | 0.09<br>48   | Up   |
| SYT5     | 59.410<br>09792 | 32.26104244 | 86.55915341 | 2.6830<br>86065 | 1.423893<br>333      | 0.01<br>0603 | 0.07<br>7156 | Up   |
| SYT7     | 391.54<br>12541 | 559.1720301 | 223.9104781 | 0.4004<br>32186 | -<br>1.320370<br>157 | 0.00<br>4351 | 0.04<br>0039 | Down |
| SYT8     | 798.38<br>67273 | 154.3238751 | 1442.44958  | 9.3468<br>98389 | 3.224487<br>71       | 1.52<br>E-16 | 4.25<br>E-14 | Up   |
| SYT9     | 98.672<br>77248 | 171.9658862 | 25.37965872 | 0.1475<br>85427 | -<br>2.760377<br>824 | 0.00<br>0113 | 0.00<br>2276 | Down |
| SYTL1    | 418.20<br>36594 | 153.2958704 | 683.1114484 | 4.4561<br>6341  | 2.155802<br>138      | 4.86<br>E-08 | 2.65<br>E-06 | Up   |
| SYTL2    | 1652.4<br>10793 | 2351.130974 | 953.690612  | 0.4056<br>30576 | -<br>1.301761<br>689 | 0.00<br>2366 | 0.02<br>5414 | Down |
| SYTL4    | 783.94<br>77761 | 1073.040184 | 494.8553681 | 0.4611<br>71329 | -<br>1.116625<br>27  | 0.01<br>3147 | 0.08<br>9934 | Down |

|         |                 |             |             |                 |                      |              |              |      |
|---------|-----------------|-------------|-------------|-----------------|----------------------|--------------|--------------|------|
| TACC1   | 4756.8<br>60624 | 6704.506379 | 2809.214868 | 0.4190<br>03982 | -<br>1.254964<br>141 | 0.00<br>0277 | 0.00<br>477  | Down |
| TACR2   | 67.319<br>94474 | 31.85416055 | 102.7857289 | 3.2267<br>59932 | 1.690086<br>247      | 0.00<br>1513 | 0.01<br>8129 | Up   |
| TACSTD2 | 827.56<br>98911 | 124.3133446 | 1530.826438 | 12.314<br>25671 | 3.622257<br>644      | 5.69<br>E-20 | 2.95<br>E-17 | Up   |
| TAGAP   | 192.37<br>89227 | 110.1433036 | 274.6145418 | 2.4932<br>47732 | 1.318026<br>238      | 0.00<br>1151 | 0.01<br>4733 | Up   |
| TAGLN   | 63200.<br>42653 | 106018.628  | 20382.22508 | 0.1922<br>51357 | -<br>2.378934<br>315 | 0.03<br>6017 | 0.18<br>2625 | Down |
| TAL1    | 604.11<br>10988 | 918.4522431 | 289.7699544 | 0.3154<br>98118 | -<br>1.664296<br>695 | 5.72<br>E-06 | 0.00<br>0186 | Down |
| TAP     | 11.236<br>26296 | 0.440357163 | 22.03216876 | 50.032<br>4977  | 5.644793<br>571      | 0.00<br>3584 | 0.03<br>4632 | Up   |
| TAP1    | 3205.3<br>06644 | 2101.860555 | 4308.752734 | 2.0499<br>70786 | 1.035603<br>35       | 0.00<br>912  | 0.06<br>9303 | Up   |
| TARP    | 72.185<br>30975 | 26.14538706 | 118.2252324 | 4.5218<br>3906  | 2.176909<br>645      | 7.12<br>E-05 | 0.00<br>1581 | Up   |
| TARSL2  | 157.06<br>03513 | 55.10057801 | 259.0201246 | 4.7008<br>60389 | 2.232924<br>835      | 8.65<br>E-07 | 3.54<br>E-05 | Up   |
| TAT     | 135.78<br>64512 | 17.09418342 | 254.4787191 | 14.886<br>86022 | 3.895967<br>603      | 0.00<br>0817 | 0.01<br>1314 | Up   |
| TBC1D4  | 1239.6<br>78702 | 1858.23307  | 621.1243346 | 0.3342<br>55344 | -<br>1.580977<br>468 | 7.80<br>E-06 | 0.00<br>024  | Down |
| TBC1D8B | 622.99<br>42088 | 929.4716678 | 316.5167498 | 0.3405<br>34048 | -<br>1.554129<br>042 | 0.00<br>1375 | 0.01<br>6911 | Down |
| TBX1    | 66.772<br>24662 | 117.1108827 | 16.43361055 | 0.1403<br>25221 | -<br>2.833153<br>759 | 2.96<br>E-07 | 1.36<br>E-05 | Down |
| TBX15   | 640.45<br>85401 | 997.0360351 | 283.8810451 | 0.2847<br>2496  | -<br>1.812359<br>125 | 0.00<br>5067 | 0.04<br>5051 | Down |
| TBX18   | 155.90<br>0412  | 281.6999574 | 30.10086656 | 0.1068<br>54353 | -<br>3.226282<br>42  | 0.00<br>944  | 0.07<br>0967 | Down |
| TBX19   | 65.846<br>71021 | 33.17410683 | 98.5193136  | 2.9697<br>65369 | 1.570348<br>953      | 0.00<br>3519 | 0.03<br>4216 | Up   |
| TBX20   | 19.177<br>31645 | 37.00282628 | 1.35180663  | 0.0365<br>32524 | -<br>4.774674        | 0.00<br>0632 | 0.00<br>9175 | Down |



|        |                 |             |             |                 |                      |              |              |      |
|--------|-----------------|-------------|-------------|-----------------|----------------------|--------------|--------------|------|
|        |                 |             |             |                 | 768                  |              |              |      |
| TBX21  | 78.420<br>59542 | 42.65529854 | 114.1858923 | 2.6769<br>45097 | 1.420587<br>55       | 0.00<br>4437 | 0.04<br>0578 | Up   |
| TCAIM  | 129.12<br>58723 | 81.86367516 | 176.3880695 | 2.1546<br>5613  | 1.107457<br>642      | 0.01<br>1474 | 0.08<br>1434 | Up   |
| TCF4   | 3829.8<br>21941 | 5215.973893 | 2443.669988 | 0.4684<br>97358 | -<br>1.093887<br>183 | 0.00<br>1427 | 0.01<br>74   | Down |
| TCN2   | 6590.1<br>60063 | 9450.518236 | 3729.801889 | 0.3946<br>66387 | -<br>1.341294<br>441 | 9.17<br>E-05 | 0.00<br>1945 | Down |
| TCOF1  | 1681.9<br>14676 | 1117.470917 | 2246.358435 | 2.0102<br>16464 | 1.007350<br>862      | 0.00<br>3908 | 0.03<br>6765 | Up   |
| TDRD9  | 41.153<br>08528 | 22.77432103 | 59.53184953 | 2.6139<br>90092 | 1.386253<br>673      | 0.02<br>7244 | 0.15<br>0705 | Up   |
| TDRKH  | 67.863<br>39445 | 28.21447218 | 107.5123167 | 3.8105<br>3794  | 1.929994<br>68       | 0.00<br>0499 | 0.00<br>7709 | Up   |
| TEAD2  | 1285.9<br>46827 | 809.944439  | 1761.949216 | 2.1753<br>95164 | 1.121277<br>493      | 0.00<br>151  | 0.01<br>8119 | Up   |
| TEAD4  | 170.05<br>81041 | 245.3243442 | 94.79186405 | 0.3863<br>94038 | -<br>1.371855<br>26  | 0.01<br>6423 | 0.10<br>573  | Down |
| TEK    | 1074.4<br>25256 | 1520.450407 | 628.4001059 | 0.4132<br>98654 | -<br>1.274743<br>431 | 0.00<br>4305 | 0.03<br>9759 | Down |
| TENM2  | 154.26<br>68603 | 90.45366588 | 218.0800547 | 2.4109<br>58722 | 1.269606<br>951      | 0.00<br>3912 | 0.03<br>678  | Up   |
| TENM4  | 289.43<br>28037 | 407.8649378 | 171.0006696 | 0.4192<br>58077 | -<br>1.254089<br>516 | 0.00<br>1284 | 0.01<br>6052 | Down |
| TERT   | 96.107<br>51867 | 19.45423954 | 172.7607978 | 8.8803<br>67562 | 3.150619<br>392      | 2.51<br>E-09 | 1.98<br>E-07 | Up   |
| TEX101 | 11.750<br>99512 | 0.391806901 | 23.11018334 | 58.983<br>60466 | 5.882242<br>087      | 0.00<br>014  | 0.00<br>273  | Up   |
| TEX26  | 49.949<br>57015 | 98.55158748 | 1.347552809 | 0.0136<br>73578 | -<br>6.192465<br>394 | 2.29<br>E-07 | 1.08<br>E-05 | Down |
| TF     | 124.76<br>76396 | 213.5227071 | 36.012572   | 0.1686<br>59214 | -<br>2.567816<br>957 | 3.23<br>E-08 | 1.88<br>E-06 | Down |
| TFAP2A | 1761.2<br>90012 | 631.5394827 | 2891.040541 | 4.5777<br>66901 | 2.194644<br>003      | 1.79<br>E-09 | 1.50<br>E-07 | Up   |
| TFAP2B | 321.95<br>79092 | 48.98898857 | 594.9268299 | 12.144<br>09293 | 3.602182<br>831      | 8.69<br>E-16 | 2.25<br>E-13 | Up   |

|         |                 |             |             |                 |                      |              |              |      |
|---------|-----------------|-------------|-------------|-----------------|----------------------|--------------|--------------|------|
| TFAP2C  | 1206.7<br>5435  | 504.4358889 | 1909.07281  | 3.7845<br>69759 | 1.920129<br>3        | 6.37<br>E-07 | 2.70<br>E-05 | Up   |
| TFAP4   | 159.91<br>42196 | 82.95333495 | 236.8751042 | 2.8555<br>22378 | 1.513754<br>69       | 0.00<br>0494 | 0.00<br>7658 | Up   |
| TFCP2L1 | 56.210<br>82027 | 8.227944917 | 104.1936956 | 12.663<br>39246 | 3.662592<br>042      | 9.86<br>E-07 | 3.98<br>E-05 | Up   |
| TFPI    | 169.42<br>89343 | 286.7212216 | 52.136647   | 0.1818<br>37419 | -<br>2.459278<br>981 | 2.15<br>E-05 | 0.00<br>0571 | Down |
| TFR2    | 18.096<br>36881 | 29.12446234 | 7.068275288 | 0.2426<br>92044 | -<br>2.042801<br>282 | 0.01<br>8614 | 0.11<br>5853 | Down |
| TGFA    | 822.95<br>5949  | 152.1572926 | 1493.754605 | 9.8171<br>73924 | 3.295307<br>775      | 1.21<br>E-17 | 3.91<br>E-15 | Up   |
| TGFB1I1 | 3174.8<br>59851 | 4842.771446 | 1506.948256 | 0.3111<br>74763 | -<br>1.684203<br>037 | 0.00<br>5834 | 0.04<br>9979 | Down |
| TGFBR2  | 5667.8<br>22104 | 7825.258621 | 3510.385587 | 0.4485<br>9675  | -<br>1.156508<br>926 | 0.00<br>0704 | 0.01<br>005  | Down |
| TGFBR3  | 11589.<br>08309 | 16951.20341 | 6226.96278  | 0.3673<br>46355 | -<br>1.444787<br>136 | 0.00<br>3143 | 0.03<br>1558 | Down |
| TGIF1   | 1130.5<br>87612 | 741.6610503 | 1519.514175 | 2.0487<br>98671 | 1.034778<br>223      | 0.00<br>2785 | 0.02<br>8745 | Up   |
| TGIF2   | 738.76<br>54809 | 423.0764985 | 1054.454463 | 2.4923<br>49415 | 1.317506<br>341      | 0.00<br>0314 | 0.00<br>5281 | Up   |
| THBD    | 2489.4<br>94637 | 4489.211828 | 489.7774453 | 0.1091<br>00988 | -<br>3.196263<br>93  | 0.00<br>0211 | 0.00<br>3868 | Down |
| THBS2   | 3330.1<br>14634 | 6161.774829 | 498.4544392 | 0.0808<br>94621 | -<br>3.627812<br>415 | 2.13<br>E-10 | 2.12<br>E-08 | Down |
| THBS3   | 2340.0<br>43267 | 4255.789569 | 424.2969654 | 0.0996<br>98765 | -<br>3.326280<br>552 | 2.51<br>E-05 | 0.00<br>0653 | Down |
| THBS4   | 5333.0<br>68326 | 10109.59078 | 556.5458692 | 0.0550<br>51276 | -<br>4.183080<br>195 | 0.04<br>8501 | 0.22<br>4282 | Down |
| THEM4   | 235.22<br>20782 | 133.732823  | 336.7113335 | 2.5177<br>91265 | 1.332158<br>683      | 0.00<br>0971 | 0.01<br>2949 | Up   |
| THEM6   | 107.11<br>6874  | 35.97697558 | 178.2567725 | 4.9547<br>45907 | 2.308811<br>074      | 2.31<br>E-06 | 8.43<br>E-05 | Up   |
| THPO    | 189.47          | 303.9367078 | 75.01309094 | 0.2468          | -                    | 0.02         | 0.14         | Down |

|        |                 |             |             |                 |                      |              |              |          |
|--------|-----------------|-------------|-------------|-----------------|----------------------|--------------|--------------|----------|
|        | 48994           |             |             | 04973           | 2.018556<br>631      | 5375         | 3738         | n        |
| THRB   | 731.26<br>55132 | 1114.95518  | 347.5758463 | 0.3117<br>39747 | -<br>1.681585<br>982 | 3.28<br>E-06 | 0.00<br>0114 | Dow<br>n |
| THRSP  | 204.94<br>83093 | 382.9541578 | 26.94246079 | 0.0703<br>54272 | -<br>3.829218<br>172 | 0.01<br>3009 | 0.08<br>9361 | Dow<br>n |
| THSD1  | 492.58<br>09727 | 812.4061267 | 172.7558188 | 0.2126<br>47115 | -<br>2.233466<br>815 | 1.33<br>E-08 | 8.52<br>E-07 | Dow<br>n |
| THSD4  | 91.024<br>10267 | 154.1098693 | 27.93833609 | 0.1812<br>88429 | -<br>2.463641<br>249 | 0.00<br>8452 | 0.06<br>556  | Dow<br>n |
| THSD7A | 60.522<br>36326 | 90.61612767 | 30.42859884 | 0.3357<br>96724 | -<br>1.574339<br>938 | 0.00<br>4151 | 0.03<br>8512 | Dow<br>n |
| THY1   | 13319.<br>61053 | 19605.10001 | 7034.121039 | 0.3587<br>90368 | -<br>1.478786<br>936 | 0.00<br>0189 | 0.00<br>3535 | Dow<br>n |
| TIAM1  | 319.82<br>89197 | 164.5351743 | 475.122665  | 2.8876<br>66221 | 1.529903<br>994      | 6.77<br>E-05 | 0.00<br>1518 | Up       |
| TIE1   | 1612.5<br>86565 | 2268.098193 | 957.074936  | 0.4219<br>72443 | -<br>1.244779<br>308 | 0.00<br>0284 | 0.00<br>4867 | Dow<br>n |
| TIMD4  | 233.41<br>37876 | 118.7207331 | 348.1068421 | 2.9321<br>48691 | 1.551958<br>265      | 0.00<br>0372 | 0.00<br>6097 | Up       |
| TIMP1  | 6650.4<br>64468 | 11476.18498 | 1824.74395  | 0.1590<br>02661 | -<br>2.652877<br>185 | 1.16<br>E-07 | 5.84<br>E-06 | Dow<br>n |
| TIMP2  | 6060.6<br>11153 | 10588.3441  | 1532.878208 | 0.1447<br>70343 | -<br>2.788162<br>005 | 1.39<br>E-05 | 0.00<br>0391 | Dow<br>n |
| TIMP3  | 6428.2<br>72819 | 9463.304505 | 3393.241132 | 0.3585<br>68313 | -<br>1.479680<br>093 | 1.31<br>E-05 | 0.00<br>0374 | Dow<br>n |
| TJP3   | 1601.4<br>76537 | 871.4064945 | 2331.54658  | 2.6756<br>13041 | 1.419869<br>482      | 0.02<br>8426 | 0.15<br>5303 | Up       |
| TLDC2  | 6.9938<br>548   | 0           | 13.9877096  | Inf             | Inf                  | 0.00<br>2225 | 0.02<br>4231 | Up       |
| TLL1   | 217.74<br>56092 | 364.1357951 | 71.35542329 | 0.1959<br>58278 | -<br>2.351381<br>577 | 2.21<br>E-08 | 1.34<br>E-06 | Dow<br>n |
| TLL2   | 137.78          | 269.5596325 | 6.017203154 | 0.0223          | -                    | 0.01         | 0.10         | Dow      |

|          |                 |             |             |                 |                      |              |              |          |
|----------|-----------------|-------------|-------------|-----------------|----------------------|--------------|--------------|----------|
|          | 84178           |             |             | 22345           | 5.485367<br>588      | 6853         | 7564         | n        |
| TLR10    | 51.822<br>16469 | 32.69021468 | 70.95411471 | 2.1705<br>00115 | 1.118027<br>499      | 0.04<br>6781 | 0.21<br>8163 | Up       |
| TLR7     | 204.00<br>18356 | 106.6853514 | 301.3183197 | 2.8243<br>64505 | 1.497926<br>291      | 0.00<br>0309 | 0.00<br>5213 | Up       |
| TLR9     | 32.070<br>20836 | 18.08735348 | 46.05306323 | 2.5461<br>47134 | 1.348315<br>79       | 0.04<br>377  | 0.20<br>7969 | Up       |
| TM4SF5   | 41.748<br>36648 | 19.84653171 | 63.65020126 | 3.2071<br>19622 | 1.681278<br>166      | 0.00<br>8381 | 0.06<br>5219 | Up       |
| TMC4     | 1217.3<br>52194 | 566.0919951 | 1868.612392 | 3.3008<br>98809 | 1.722858<br>912      | 1.69<br>E-06 | 6.46<br>E-05 | Up       |
| TMC6     | 879.31<br>53284 | 560.7017085 | 1197.928948 | 2.1364<br>81716 | 1.095236<br>97       | 0.00<br>2122 | 0.02<br>341  | Up       |
| TMC8     | 279.73<br>86969 | 175.1633851 | 384.3140087 | 2.1940<br>31639 | 1.133584<br>33       | 0.00<br>3919 | 0.03<br>683  | Up       |
| TMCC3    | 316.02<br>03125 | 163.7317336 | 468.3088913 | 2.8602<br>20686 | 1.516126<br>465      | 0.00<br>012  | 0.00<br>239  | Up       |
| TMED3    | 1760.1<br>35699 | 2607.051532 | 913.2198659 | 0.3502<br>88383 | -<br>1.513384<br>951 | 0.00<br>4045 | 0.03<br>7714 | Dow<br>n |
| TMEM100  | 400.86<br>77797 | 612.7366566 | 188.9989027 | 0.3084<br>50459 | -<br>1.696889<br>304 | 0.00<br>5157 | 0.04<br>5561 | Dow<br>n |
| TMEM102  | 127.48<br>51718 | 37.64033318 | 217.3300105 | 5.7738<br>59902 | 2.529536<br>102      | 1.16<br>E-07 | 5.83<br>E-06 | Up       |
| TMEM108  | 42.809<br>33225 | 21.23752363 | 64.38114088 | 3.0314<br>806   | 1.600022<br>59       | 0.01<br>0538 | 0.07<br>6806 | Up       |
| TMEM116  | 80.310<br>31391 | 25.47683915 | 135.1437887 | 5.3045<br>74396 | 2.407237<br>004      | 9.71<br>E-05 | 0.00<br>2033 | Up       |
| TMEM119  | 1428.1<br>96396 | 2017.562398 | 838.8303949 | 0.4157<br>64289 | -<br>1.266162<br>249 | 0.03<br>0743 | 0.16<br>3968 | Dow<br>n |
| TMEM132C | 81.131<br>65357 | 10.04293911 | 152.220368  | 15.156<br>95419 | 3.921907<br>966      | 6.71<br>E-12 | 8.58<br>E-10 | Up       |
| TMEM132E | 123.99<br>21374 | 199.2670641 | 48.71721064 | 0.2444<br>82001 | -<br>2.032199<br>836 | 0.01<br>4125 | 0.09<br>5117 | Dow<br>n |
| TMEM135  | 481.08<br>36697 | 642.2509001 | 319.9164394 | 0.4981<br>17541 | -<br>1.005441<br>878 | 0.00<br>5842 | 0.04<br>9979 | Dow<br>n |
| TMEM136  | 203.34<br>96875 | 335.8547739 | 70.84460123 | 0.2109<br>38199 | -<br>2.245107<br>715 | 0.01<br>8801 | 0.11<br>6497 | Dow<br>n |

|          |                 |             |             |                 |                      |              |              |      |
|----------|-----------------|-------------|-------------|-----------------|----------------------|--------------|--------------|------|
| TMEM139  | 114.39<br>3866  | 32.04887602 | 196.7388559 | 6.1387<br>13127 | 2.617936<br>252      | 4.62<br>E-06 | 0.00<br>0154 | Up   |
| TMEM144  | 198.10<br>31005 | 70.52815371 | 325.6780472 | 4.6177<br>0272  | 2.207175<br>298      | 2.82<br>E-07 | 1.31<br>E-05 | Up   |
| TMEM165  | 1512.5<br>85383 | 2035.300274 | 989.8704906 | 0.4863<br>51082 | -<br>1.039929<br>968 | 0.00<br>2439 | 0.02<br>594  | Down |
| TMEM173  | 762.81<br>8589  | 461.9939925 | 1063.643186 | 2.3022<br>87915 | 1.203068<br>262      | 0.00<br>0712 | 0.01<br>0117 | Up   |
| TMEM176A | 795.19<br>44659 | 239.9394141 | 1350.449518 | 5.6282<br>93803 | 2.492697<br>641      | 1.59<br>E-06 | 6.13<br>E-05 | Up   |
| TMEM176B | 987.98<br>30503 | 485.537441  | 1490.42866  | 3.0696<br>47227 | 1.618072<br>866      | 0.00<br>0129 | 0.00<br>2542 | Up   |
| TMEM184A | 125.72<br>60501 | 39.09346542 | 212.3586347 | 5.4320<br>74964 | 2.441503<br>389      | 3.00<br>E-07 | 1.37<br>E-05 | Up   |
| TMEM184B | 1573.1<br>28088 | 2171.456472 | 974.7997044 | 0.4489<br>15148 | -<br>1.155485<br>315 | 0.00<br>0986 | 0.01<br>3115 | Down |
| TMEM190  | 111.89<br>19313 | 52.56395563 | 171.219907  | 3.2573<br>63433 | 1.703704<br>694      | 0.00<br>0408 | 0.00<br>6545 | Up   |
| TMEM200B | 539.30<br>46222 | 748.0124804 | 330.5967639 | 0.4419<br>66909 | -<br>1.177989<br>739 | 0.02<br>4983 | 0.14<br>2215 | Down |
| TMEM213  | 17.645<br>52637 | 1.589237727 | 33.70181502 | 21.206<br>27673 | 4.406419<br>438      | 5.07<br>E-05 | 0.00<br>1183 | Up   |
| TMEM229B | 313.30<br>87344 | 162.4342032 | 464.1832656 | 2.8576<br>69484 | 1.514839<br>065      | 0.00<br>0101 | 0.00<br>2089 | Up   |
| TMEM255A | 95.141<br>0273  | 179.1234961 | 11.15855846 | 0.0622<br>95336 | -<br>4.004732<br>025 | 5.06<br>E-12 | 6.65<br>E-10 | Down |
| TMEM257  | 31.303<br>13091 | 10.80454279 | 51.80171904 | 4.7944<br>38789 | 2.261361<br>951      | 0.00<br>1595 | 0.01<br>8867 | Up   |
| TMEM263  | 2707.5<br>99281 | 4007.254002 | 1407.944561 | 0.3513<br>48969 | -<br>1.509023<br>431 | 1.50<br>E-05 | 0.00<br>0415 | Down |
| TMEM30B  | 852.00<br>58558 | 460.5394284 | 1243.472283 | 2.7000<br>34365 | 1.432977<br>77       | 9.33<br>E-05 | 0.00<br>197  | Up   |
| TMEM44   | 528.84<br>872   | 709.4145764 | 348.2828636 | 0.4909<br>44048 | -<br>1.026369<br>483 | 0.00<br>4973 | 0.04<br>4455 | Down |
| TMEM45B  | 152.84<br>48093 | 11.62652161 | 294.063097  | 25.292<br>43974 | 4.660634<br>302      | 2.55<br>E-19 | 1.13<br>E-16 | Up   |
| TMEM47   | 399.92<br>81246 | 667.5995075 | 132.2567416 | 0.1981<br>07908 | -<br>2.335641        | 0.00<br>0953 | 0.01<br>2775 | Down |

|         |                 |             |             |                 |                      |              |              |      |
|---------|-----------------|-------------|-------------|-----------------|----------------------|--------------|--------------|------|
|         |                 |             |             |                 | 627                  |              |              |      |
| TMEM54  | 101.97<br>96893 | 33.22979726 | 170.7295814 | 5.1378<br>46013 | 2.361163<br>652      | 1.77<br>E-06 | 6.72<br>E-05 | Up   |
| TMEM55A | 52.978<br>09108 | 82.60439392 | 23.35178824 | 0.2826<br>94263 | -<br>1.822685<br>491 | 0.00<br>1457 | 0.01<br>7691 | Down |
| TMEM63C | 41.748<br>24253 | 7.418276237 | 76.07820882 | 10.255<br>51036 | 3.358327<br>384      | 1.05<br>E-06 | 4.21<br>E-05 | Up   |
| TMEM65  | 414.94<br>48578 | 648.2759269 | 181.6137886 | 0.2801<br>48901 | -<br>1.835734<br>261 | 0.00<br>0836 | 0.01<br>152  | Down |
| TMEM74B | 20.444<br>58353 | 4.054659765 | 36.83450729 | 9.0844<br>8783  | 3.183405<br>18       | 0.00<br>0496 | 0.00<br>7673 | Up   |
| TMEM79  | 259.06<br>02106 | 88.34591433 | 429.7745069 | 4.8646<br>78917 | 2.282344<br>586      | 5.39<br>E-08 | 2.91<br>E-06 | Up   |
| TMEM89  | 40.600<br>39368 | 15.97199768 | 65.22878967 | 4.0839<br>46852 | 2.029964<br>091      | 0.00<br>1973 | 0.02<br>2073 | Up   |
| TMEM9   | 1010.4<br>89967 | 622.4918193 | 1398.488114 | 2.2465<br>96776 | 1.167741<br>21       | 0.00<br>1052 | 0.01<br>3771 | Up   |
| TMF1    | 865.07<br>87435 | 1193.186106 | 536.9713813 | 0.4500<br>31541 | -<br>1.151901<br>978 | 0.00<br>1353 | 0.01<br>6719 | Down |
| TMIGD2  | 15.567<br>66883 | 5.847158572 | 25.28817908 | 4.3248<br>66304 | 2.112655<br>535      | 0.02<br>6586 | 0.14<br>815  | Up   |
| TMOD1   | 479.87<br>42245 | 800.2438297 | 159.5046193 | 0.1993<br>20024 | -<br>2.326841<br>442 | 0.02<br>5898 | 0.14<br>5746 | Down |
| TMOD2   | 491.57<br>99306 | 832.0313107 | 151.1285505 | 0.1816<br>38057 | -<br>2.460861<br>587 | 0.00<br>0643 | 0.00<br>9315 | Down |
| TMPRSS2 | 1553.6<br>05466 | 281.2728217 | 2825.938111 | 10.046<br>9647  | 3.328687<br>808      | 4.12<br>E-18 | 1.50<br>E-15 | Up   |
| TMPRSS4 | 50.165<br>93903 | 1.981044628 | 98.35083342 | 49.645<br>94541 | 5.633603<br>992      | 7.49<br>E-06 | 0.00<br>0232 | Up   |
| TMPRSS5 | 6.1192<br>14871 | 12.23842974 | 0           | 0               | #NAME?               | 0.02<br>5408 | 0.14<br>3807 | Down |
| TMPRSS6 | 182.54<br>78405 | 81.3529123  | 283.7427687 | 3.4878<br>00998 | 1.802317<br>727      | 2.36<br>E-05 | 0.00<br>0622 | Up   |
| TMTC1   | 251.54<br>16777 | 402.4507415 | 100.632614  | 0.2500<br>49518 | -<br>1.999714<br>27  | 0.00<br>3165 | 0.03<br>168  | Down |
| TMX4    | 1851.2<br>01016 | 2552.929235 | 1149.472797 | 0.4502<br>56428 | -<br>1.151181<br>223 | 0.00<br>0996 | 0.01<br>3191 | Down |

|               |                 |             |             |                 |                      |              |              |      |
|---------------|-----------------|-------------|-------------|-----------------|----------------------|--------------|--------------|------|
| TNF           | 119.28<br>9261  | 31.25343734 | 207.3250847 | 6.6336<br>73041 | 2.729807<br>907      | 1.94<br>E-08 | 1.20<br>E-06 | Up   |
| TNFAIP2       | 726.13<br>79156 | 425.9461429 | 1026.329688 | 2.4095<br>29246 | 1.268751<br>312      | 0.03<br>7098 | 0.18<br>626  | Up   |
| TNFAIP6       | 447.62<br>14369 | 819.6929539 | 75.5499199  | 0.0921<br>68561 | -<br>3.439581<br>466 | 0.00<br>0514 | 0.00<br>7886 | Down |
| TNFAIP8L3     | 644.33<br>00423 | 1108.366505 | 180.2935792 | 0.1626<br>6603  | -<br>2.620015<br>094 | 0.00<br>3484 | 0.03<br>3988 | Down |
| TNFRSF12<br>A | 1303.1<br>37079 | 2123.0528   | 483.2213578 | 0.2276<br>06849 | -<br>2.135384<br>125 | 0.03<br>7474 | 0.18<br>7364 | Down |
| TNFRSF18      | 63.216<br>75565 | 28.66501459 | 97.76849672 | 3.4107<br>25517 | 1.770078<br>657      | 0.00<br>1583 | 0.01<br>8766 | Up   |
| TNFRSF19      | 501.73<br>40483 | 282.0952523 | 721.3728442 | 2.5571<br>95977 | 1.354562<br>729      | 0.00<br>0252 | 0.00<br>4408 | Up   |
| TNFRSF21      | 4152.2<br>91963 | 1954.19588  | 6350.388045 | 3.2496<br>16945 | 1.700269<br>668      | 9.51<br>E-05 | 0.00<br>2002 | Up   |
| TNFSF11       | 293.95<br>76191 | 6.577052142 | 581.3381861 | 88.388<br>86685 | 6.465792<br>759      | 5.55<br>E-35 | 3.36<br>E-31 | Up   |
| TNFSF13B      | 127.27<br>60887 | 43.81764361 | 210.7345339 | 4.8093<br>53413 | 2.265842<br>946      | 1.24<br>E-06 | 4.88<br>E-05 | Up   |
| TNFSF14       | 41.070<br>22357 | 24.59561041 | 57.54483674 | 2.3396<br>38488 | 1.226285<br>627      | 0.04<br>0358 | 0.19<br>6961 | Up   |
| TNFSF18       | 88.833<br>87325 | 167.9980374 | 9.669709102 | 0.0575<br>58465 | -<br>4.118828<br>08  | 0.00<br>0141 | 0.00<br>2739 | Down |
| TNK1          | 409.94<br>67433 | 158.8253631 | 661.0681235 | 4.1622<br>32723 | 2.057357<br>633      | 1.63<br>E-07 | 7.94<br>E-06 | Up   |
| TNMD          | 14.917<br>76551 | 26.26093821 | 3.574592813 | 0.1361<br>18245 | -<br>2.877067<br>643 | 0.00<br>353  | 0.03<br>4287 | Down |
| TNNI2         | 51.521<br>98867 | 15.03479828 | 88.00917907 | 5.8536<br>98695 | 2.549348<br>488      | 3.13<br>E-05 | 0.00<br>0785 | Up   |
| TNS1          | 10113.<br>90214 | 17089.56939 | 3138.234895 | 0.1836<br>34521 | -<br>2.445090<br>8   | 2.79<br>E-07 | 1.30<br>E-05 | Down |
| TNXB          | 10070.<br>94336 | 14627.97488 | 5513.911835 | 0.3769<br>42938 | -<br>1.407581<br>95  | 2.43<br>E-05 | 0.00<br>0638 | Down |
| TOP1MT        | 46.827<br>33858 | 15.52711051 | 78.12756665 | 5.0316<br>87423 | 2.331042<br>302      | 0.00<br>0216 | 0.00<br>3935 | Up   |
| TOX3          | 42.368          | 25.49155441 | 59.24529601 | 2.3241          | 1.216681             | 0.04         | 0.22         | Up   |

|          |                 |             |             |                 |                      |              |              |          |
|----------|-----------------|-------------|-------------|-----------------|----------------------|--------------|--------------|----------|
|          | 42521           |             |             | 14687           | 263                  | 8932         | 5472         |          |
| TP53I11  | 401.00<br>64367 | 534.866178  | 267.1466954 | 0.4994<br>64551 | -<br>1.001545<br>808 | 0.00<br>6707 | 0.05<br>5073 | Dow<br>n |
| TP53INP2 | 788.66<br>31878 | 1239.562769 | 337.7636069 | 0.2724<br>86086 | -<br>1.875745<br>533 | 0.01<br>7131 | 0.10<br>8857 | Dow<br>n |
| TP63     | 994.08<br>21716 | 352.9308777 | 1635.233465 | 4.6332<br>96684 | 2.212039<br>066      | 2.65<br>E-09 | 2.06<br>E-07 | Up       |
| TP73     | 252.06<br>18075 | 78.11588518 | 426.0077298 | 5.4535<br>35204 | 2.447191<br>747      | 5.70<br>E-09 | 4.12<br>E-07 | Up       |
| TPD52L1  | 238.00<br>27276 | 117.5815817 | 358.4238736 | 3.0482<br>99474 | 1.608004<br>645      | 0.01<br>2371 | 0.08<br>5885 | Up       |
| TPM1     | 21136.<br>23728 | 33946.20318 | 8326.271369 | 0.2452<br>78428 | -<br>2.027507<br>736 | 0.03<br>4813 | 0.17<br>9297 | Dow<br>n |
| TPM2     | 39563.<br>04087 | 69850.19744 | 9275.884306 | 0.1327<br>96823 | -<br>2.912707<br>463 | 0.04<br>1013 | 0.19<br>8559 | Dow<br>n |
| TPM4     | 15688.<br>69341 | 20921.2997  | 10456.08712 | 0.4997<br>8191  | -<br>1.000629<br>412 | 0.00<br>3258 | 0.03<br>241  | Dow<br>n |
| TPO      | 47.728<br>16073 | 5.529316858 | 89.9270046  | 16.263<br>6736  | 4.023581<br>261      | 7.44<br>E-09 | 5.24<br>E-07 | Up       |
| TRAF2    | 1522.7<br>49045 | 891.0974325 | 2154.400657 | 2.4176<br>9371  | 1.273631<br>486      | 0.00<br>0276 | 0.00<br>4759 | Up       |
| TRAF4    | 1258.2<br>31173 | 833.7377447 | 1682.7246   | 2.0182<br>90057 | 1.013133<br>525      | 0.03<br>2006 | 0.16<br>8786 | Up       |
| TRAF5    | 409.28<br>76448 | 640.0310004 | 178.5442892 | 0.2789<br>6194  | -<br>1.841859<br>795 | 0.04<br>9789 | 0.22<br>774  | Dow<br>n |
| TRAK2    | 474.20<br>70031 | 662.0256047 | 286.3884015 | 0.4325<br>94147 | -<br>1.208913<br>951 | 0.00<br>1145 | 0.01<br>4692 | Dow<br>n |
| TRAM2    | 2500.8<br>82493 | 3907.217701 | 1094.547285 | 0.2801<br>34707 | -<br>1.835807<br>36  | 0.00<br>5991 | 0.05<br>0794 | Dow<br>n |
| TRAPPC6A | 516.33<br>35132 | 264.2477094 | 768.419317  | 2.9079<br>50721 | 1.540002<br>821      | 3.66<br>E-05 | 0.00<br>0903 | Up       |
| TRAT1    | 89.287<br>59857 | 46.03979992 | 132.5353972 | 2.8787<br>1358  | 1.525424<br>254      | 0.00<br>1682 | 0.01<br>9595 | Up       |
| TREM2    | 131.11<br>10442 | 25.59658975 | 236.6254986 | 9.2444<br>15013 | 3.208582<br>029      | 4.16<br>E-11 | 4.60<br>E-09 | Up       |
| TRERF1   | 428.31          | 580.2015374 | 276.4186047 | 0.4764          | -                    | 0.00         | 0.04         | Dow      |



|        |                 |             |             |                 |                      |              |              |      |
|--------|-----------------|-------------|-------------|-----------------|----------------------|--------------|--------------|------|
|        | 0071            |             |             | 18256           | 1.069699<br>397      | 4488         | 0932         | n    |
| TRIM14 | 191.72<br>38727 | 75.11458678 | 308.3331586 | 4.1048<br>37313 | 2.037325<br>045      | 1.64<br>E-06 | 6.29<br>E-05 | Up   |
| TRIM15 | 6.3710<br>4595  | 0.391806901 | 12.350285   | 31.521<br>3565  | 4.978257<br>716      | 0.01<br>1999 | 0.08<br>4274 | Up   |
| TRIM16 | 447.99<br>53455 | 626.8419138 | 269.1487772 | 0.4293<br>72656 | -<br>1.219697<br>778 | 0.00<br>1096 | 0.01<br>4211 | Down |
| TRIM29 | 1324.9<br>38744 | 388.1306973 | 2261.746791 | 5.8272<br>81395 | 2.542822<br>979      | 9.13<br>E-12 | 1.15<br>E-09 | Up   |
| TRIM34 | 453.00<br>55007 | 291.3004977 | 614.7105037 | 2.1102<br>28128 | 1.077398<br>971      | 0.00<br>3565 | 0.03<br>4499 | Up   |
| TRIM36 | 316.00<br>46704 | 164.8929535 | 467.1163874 | 2.8328<br>46265 | 1.502252<br>311      | 0.00<br>0156 | 0.00<br>2998 | Up   |
| TRIM6  | 23.215<br>11973 | 10.71537708 | 35.71486237 | 3.3330<br>47649 | 1.736841<br>942      | 0.03<br>3466 | 0.17<br>3994 | Up   |
| TRIM9  | 349.30<br>22636 | 96.87943319 | 601.725094  | 6.2110<br>71579 | 2.634842<br>194      | 1.84<br>E-06 | 6.90<br>E-05 | Up   |
| TRMT2B | 41.593<br>88056 | 58.27822966 | 24.90953145 | 0.4274<br>24299 | -<br>1.226259<br>168 | 0.04<br>4969 | 0.21<br>2329 | Down |
| TRNP1  | 136.93<br>54354 | 192.7232531 | 81.14761773 | 0.4210<br>57742 | -<br>1.247910<br>004 | 0.02<br>0576 | 0.12<br>4092 | Down |
| TRPC1  | 280.53<br>89574 | 389.51238   | 171.5655347 | 0.4404<br>62341 | -<br>1.182909<br>419 | 0.00<br>2737 | 0.02<br>837  | Down |
| TRPM2  | 867.80<br>98099 | 461.6039243 | 1274.015696 | 2.7599<br>75876 | 1.464655<br>657      | 0.00<br>0481 | 0.00<br>7523 | Up   |
| TRPM3  | 120.46<br>50002 | 168.1433073 | 72.78669307 | 0.4328<br>84866 | -<br>1.207944<br>731 | 0.01<br>6582 | 0.10<br>6302 | Down |
| TRPM6  | 135.02<br>01986 | 196.7898924 | 73.25050487 | 0.3722<br>26967 | -<br>1.425745<br>514 | 0.00<br>1376 | 0.01<br>6912 | Down |
| TRPS1  | 4838.4<br>33921 | 2398.371201 | 7278.49664  | 3.0347<br>66527 | 1.601585<br>53       | 0.00<br>0136 | 0.00<br>2656 | Up   |
| TRPV3  | 48.299<br>90659 | 20.2242633  | 76.37554988 | 3.7764<br>31742 | 1.917023<br>711      | 0.01<br>9396 | 0.11<br>8765 | Up   |
| TRPV4  | 126.20<br>88839 | 65.93989716 | 186.4778707 | 2.8279<br>97597 | 1.499780<br>894      | 0.00<br>085  | 0.01<br>1659 | Up   |
| TRPV6  | 464.74<br>81014 | 26.10136681 | 903.3948359 | 34.611<br>01644 | 5.113159<br>406      | 4.78<br>E-30 | 1.08<br>E-26 | Up   |

|         |                 |             |             |                 |                      |              |              |          |
|---------|-----------------|-------------|-------------|-----------------|----------------------|--------------|--------------|----------|
| TSC22D2 | 1110.6<br>84657 | 1496.000039 | 725.3692745 | 0.4848<br>72497 | -<br>1.044322<br>672 | 0.02<br>4485 | 0.14<br>0273 | Dow<br>n |
| TSHZ3   | 358.14<br>46848 | 532.1319127 | 184.157457  | 0.3460<br>74822 | -<br>1.530844<br>109 | 0.00<br>6982 | 0.05<br>6844 | Dow<br>n |
| TSLP    | 48.598<br>00488 | 72.80436082 | 24.39164893 | 0.3350<br>30054 | -<br>1.577637<br>576 | 0.00<br>6397 | 0.05<br>3272 | Dow<br>n |
| TSPAN1  | 94.804<br>81811 | 7.580921872 | 182.0287143 | 24.011<br>42202 | 4.585648<br>941      | 3.12<br>E-15 | 7.08<br>E-13 | Up       |
| TSPAN19 | 100.37<br>48897 | 30.08984151 | 170.6599378 | 5.6716<br>79518 | 2.503776<br>014      | 6.51<br>E-07 | 2.74<br>E-05 | Up       |
| TSPAN33 | 159.86<br>85721 | 97.91580767 | 221.8213365 | 2.2654<br>29268 | 1.179784<br>447      | 0.00<br>6633 | 0.05<br>4711 | Up       |
| TSPYL4  | 1489.3<br>05319 | 985.0946478 | 1993.51599  | 2.0236<br>79648 | 1.016980<br>927      | 0.00<br>3828 | 0.03<br>6271 | Up       |
| TST     | 1418.0<br>12096 | 592.6996663 | 2243.324525 | 3.7849<br>2625  | 1.920265<br>189      | 9.84<br>E-08 | 5.05<br>E-06 | Up       |
| TTC12   | 75.560<br>9529  | 16.49699054 | 134.6249153 | 8.1605<br>74192 | 3.028670<br>666      | 4.28<br>E-08 | 2.36<br>E-06 | Up       |
| TTC21A  | 279.85<br>98973 | 171.4830521 | 388.2367426 | 2.2639<br>94825 | 1.178870<br>661      | 0.00<br>2741 | 0.02<br>8372 | Up       |
| TTC22   | 21.967<br>91855 | 7.554381733 | 36.38145537 | 4.8159<br>40821 | 2.267817<br>664      | 0.00<br>8005 | 0.06<br>308  | Up       |
| TTC25   | 32.125<br>34253 | 14.6954317  | 49.55525335 | 3.3721<br>53629 | 1.753670<br>264      | 0.01<br>207  | 0.08<br>4511 | Up       |
| TTC28   | 1275.0<br>98281 | 1846.494123 | 703.70244   | 0.3811<br>01912 | -<br>1.391751<br>25  | 8.93<br>E-05 | 0.00<br>1902 | Dow<br>n |
| TTC31   | 136.38<br>6957  | 90.16963001 | 182.604284  | 2.0251<br>19588 | 1.018007<br>105      | 0.02<br>2331 | 0.13<br>1504 | Up       |
| TTC39B  | 164.02<br>03947 | 252.0235812 | 76.01720814 | 0.3016<br>27363 | -<br>1.729160<br>783 | 0.00<br>0356 | 0.00<br>5875 | Dow<br>n |
| TTC39C  | 247.22<br>76172 | 152.4744944 | 341.9807399 | 2.2428<br>71776 | 1.165347<br>144      | 0.00<br>3543 | 0.03<br>4383 | Up       |
| TTC6    | 30.210<br>92753 | 3.680332972 | 56.74152209 | 15.417<br>49687 | 3.946496<br>649      | 0.00<br>0547 | 0.00<br>8247 | Up       |
| TTLL10  | 52.594<br>77003 | 18.6570357  | 86.53250437 | 4.6380<br>62862 | 2.213522<br>374      | 0.00<br>0252 | 0.00<br>4405 | Up       |
| TTLL7   | 365.71<br>81817 | 616.2876434 | 115.1487201 | 0.1868<br>42494 | -<br>2.420105<br>49  | 5.11<br>E-08 | 2.78<br>E-06 | Dow<br>n |

|        |                 |             |             |                 |                      |              |              |      |
|--------|-----------------|-------------|-------------|-----------------|----------------------|--------------|--------------|------|
| TUBA1D | 82.343<br>32723 | 9.703087272 | 154.9835672 | 15.972<br>60365 | 3.997527<br>597      | 4.91<br>E-12 | 6.50<br>E-10 | Up   |
| TUBA4A | 544.45<br>28027 | 319.5683966 | 769.3372087 | 2.4074<br>25818 | 1.267491<br>344      | 0.00<br>1406 | 0.01<br>7231 | Up   |
| TUBA8  | 65.394<br>58197 | 37.01805595 | 93.77110798 | 2.5331<br>18111 | 1.340914<br>347      | 0.01<br>1257 | 0.08<br>0304 | Up   |
| TUBB6  | 3519.4<br>79769 | 5413.341529 | 1625.618008 | 0.3002<br>98438 | -<br>1.735531<br>122 | 0.02<br>8735 | 0.15<br>6565 | Down |
| TUBD1  | 172.08<br>46618 | 101.013663  | 243.1556607 | 2.4071<br>56154 | 1.267329<br>734      | 0.00<br>2856 | 0.02<br>9336 | Up   |
| TULP2  | 375.73<br>31976 | 248.3241073 | 503.1422879 | 2.0261<br>51602 | 1.018742<br>125      | 0.00<br>7088 | 0.05<br>7393 | Up   |
| TUSC5  | 946.76<br>51523 | 1886.868583 | 6.661721999 | 0.0035<br>3057  | -<br>8.145883<br>08  | 0.00<br>8721 | 0.06<br>7091 | Down |
| TWIST1 | 433.48<br>58081 | 626.5090272 | 240.462589  | 0.3838<br>13447 | -<br>1.381522<br>839 | 0.03<br>7513 | 0.18<br>7409 | Down |
| TXK    | 129.99<br>25384 | 45.94561893 | 214.0394579 | 4.6585<br>39006 | 2.219877<br>573      | 1.81<br>E-06 | 6.82<br>E-05 | Up   |
| TXNDC5 | 2385.1<br>4017  | 3204.668301 | 1565.612039 | 0.4885<br>41057 | -<br>1.033448<br>284 | 0.00<br>2269 | 0.02<br>4626 | Down |
| TYR    | 10.819<br>35536 | 0.413817024 | 21.22489369 | 51.290<br>52805 | 5.680620<br>519      | 0.02<br>9864 | 0.16<br>0789 | Up   |
| TYRO3  | 374.06<br>33984 | 223.3897994 | 524.7369973 | 2.3489<br>74746 | 1.232031<br>203      | 0.00<br>1496 | 0.01<br>8034 | Up   |
| UAP1L1 | 811.96<br>57538 | 526.9617549 | 1096.969753 | 2.0816<br>87603 | 1.057753<br>581      | 0.00<br>2886 | 0.02<br>9604 | Up   |
| UBD    | 576.78<br>32027 | 304.0591057 | 849.5072998 | 2.7938<br>88701 | 1.482274<br>55       | 0.00<br>908  | 0.06<br>9214 | Up   |
| UBL4B  | 41.917<br>43683 | 62.00222316 | 21.8326505  | 0.3521<br>26898 | -<br>1.505832<br>661 | 0.01<br>713  | 0.10<br>8857 | Down |
| UCN2   | 10.555<br>71396 | 2.786668553 | 18.32475937 | 6.5758<br>66137 | 2.717180<br>931      | 0.02<br>767  | 0.15<br>2597 | Up   |
| UFM1   | 565.72<br>2583  | 759.6481035 | 371.7970624 | 0.4894<br>33279 | -<br>1.030815<br>893 | 0.00<br>5434 | 0.04<br>7206 | Down |
| UGGT2  | 330.46<br>25054 | 586.2624437 | 74.6625672  | 0.1273<br>53488 | -<br>2.973089<br>619 | 2.30<br>E-06 | 8.41<br>E-05 | Down |
| UGP2   | 4991.6          | 7323.699972 | 2659.588668 | 0.3631          | -                    | 0.04         | 0.20         | Down |

|         |                 |             |             |                 |                      |              |              |      |
|---------|-----------------|-------------|-------------|-----------------|----------------------|--------------|--------------|------|
|         | 4432            |             |             | 48228           | 1.461369<br>554      | 2308         | 3095         | n    |
| UGT8    | 217.94<br>10107 | 51.89914309 | 383.9828783 | 7.3986<br>3619  | 2.887259<br>359      | 1.93<br>E-08 | 1.19<br>E-06 | Up   |
| UHK1    | 99.828<br>8325  | 134.1062296 | 65.55143541 | 0.4888<br>02315 | -<br>1.032676<br>978 | 0.03<br>2844 | 0.17<br>1841 | Down |
| UMODL1  | 21.846<br>38013 | 43.44264771 | 0.250112546 | 0.0057<br>57304 | -<br>7.440390<br>797 | 1.01<br>E-05 | 0.00<br>03   | Down |
| UNC13B  | 2610.2<br>47329 | 3864.810923 | 1355.683735 | 0.3507<br>76212 | -<br>1.511377<br>181 | 1.05<br>E-05 | 0.00<br>0309 | Down |
| UNC13D  | 295.85<br>29554 | 197.0843938 | 394.6215171 | 2.0022<br>97136 | 1.001656<br>082      | 0.00<br>8437 | 0.06<br>5512 | Up   |
| UNC93B1 | 1670.0<br>96623 | 1071.454557 | 2268.738689 | 2.1174<br>38088 | 1.082319<br>787      | 0.00<br>1898 | 0.02<br>1472 | Up   |
| UPP1    | 99.516<br>26759 | 146.4357157 | 52.59681945 | 0.3591<br>80267 | -<br>1.477220<br>004 | 0.00<br>1756 | 0.02<br>0241 | Down |
| USH1C   | 77.318<br>36363 | 14.52777079 | 140.1089565 | 9.6442<br>15791 | 3.269663<br>932      | 5.44<br>E-09 | 4.00<br>E-07 | Up   |
| USP13   | 315.02<br>46023 | 426.2102855 | 203.838919  | 0.4782<br>59033 | -<br>1.064135<br>878 | 0.02<br>4133 | 0.13<br>8958 | Down |
| USP2    | 263.04<br>80025 | 131.9796889 | 394.1163162 | 2.9861<br>8916  | 1.578305<br>556      | 8.60<br>E-05 | 0.00<br>1845 | Up   |
| USP43   | 223.44<br>46667 | 104.6095442 | 342.2797892 | 3.2719<br>7477  | 1.710161<br>624      | 0.00<br>0125 | 0.00<br>2477 | Up   |
| USP44   | 117.06<br>84918 | 28.99808598 | 205.1388977 | 7.0742<br>21996 | 2.822571<br>493      | 1.07<br>E-08 | 7.22<br>E-07 | Up   |
| UST     | 585.93<br>89916 | 865.1356628 | 306.7423203 | 0.3545<br>59792 | -<br>1.495899<br>156 | 0.02<br>9037 | 0.15<br>7963 | Down |
| VANGL2  | 138.17<br>57843 | 71.16785274 | 205.1837158 | 2.8830<br>95497 | 1.527618<br>624      | 0.00<br>0485 | 0.00<br>756  | Up   |
| VASN    | 1214.7<br>35777 | 1734.7663   | 694.7052551 | 0.4004<br>60428 | -<br>1.320268<br>406 | 0.00<br>0168 | 0.00<br>3196 | Down |
| VAV1    | 229.57<br>13488 | 135.2064512 | 323.9362463 | 2.3958<br>63831 | 1.260545<br>915      | 0.00<br>1349 | 0.01<br>6681 | Up   |
| VAV3    | 944.13<br>93118 | 452.9452099 | 1435.333414 | 3.1688<br>89707 | 1.663977<br>448      | 9.68<br>E-05 | 0.00<br>2033 | Up   |
| VCAN    | 8116.9          | 14532.58714 | 1701.243999 | 0.1170          | -                    | 0.00         | 0.02         | Down |

|        |                 |             |             |                 |                      |              |              |          |
|--------|-----------------|-------------|-------------|-----------------|----------------------|--------------|--------------|----------|
|        | 15568           |             |             | 64084           | 3.094629<br>581      | 1838         | 0947         | n        |
| VCL    | 13920.<br>18162 | 22297.00533 | 5543.357907 | 0.2486<br>14459 | -<br>2.008017<br>894 | 0.00<br>6003 | 0.05<br>0857 | Dow<br>n |
| VCPKMT | 420.45<br>57683 | 187.1918988 | 653.7196378 | 3.4922<br>43212 | 1.804154<br>037      | 2.31<br>E-06 | 8.43<br>E-05 | Up       |
| VEPH1  | 99.011<br>53051 | 52.90930801 | 145.113753  | 2.7426<br>88545 | 1.455590<br>802      | 0.00<br>2671 | 0.02<br>7809 | Up       |
| VGLL1  | 29.790<br>46166 | 3.178475453 | 56.40244786 | 17.745<br>12614 | 4.149350<br>925      | 8.79<br>E-07 | 3.58<br>E-05 | Up       |
| VGLL3  | 3356.0<br>14119 | 6261.645817 | 450.3824204 | 0.0719<br>27163 | -<br>3.797319<br>485 | 0.00<br>1893 | 0.02<br>1443 | Dow<br>n |
| VIM    | 56257.<br>33786 | 83559.44781 | 28955.2279  | 0.3465<br>2249  | -<br>1.528979<br>106 | 9.58<br>E-06 | 0.00<br>0288 | Dow<br>n |
| VKORC1 | 1082.0<br>71346 | 1503.737391 | 660.405302  | 0.4391<br>75953 | -<br>1.187129<br>032 | 0.00<br>4453 | 0.04<br>0704 | Dow<br>n |
| VNN1   | 484.91<br>84732 | 189.1397653 | 780.697181  | 4.1276<br>20545 | 2.045310<br>349      | 0.03<br>702  | 0.18<br>6169 | Up       |
| VPS37D | 108.30<br>83562 | 70.38459866 | 146.2321136 | 2.0776<br>15223 | 1.054928<br>49       | 0.02<br>4426 | 0.14<br>011  | Up       |
| VSIG1  | 9.9914<br>96037 | 0.783613802 | 19.19937827 | 24.501<br>07213 | 4.614772<br>976      | 0.00<br>1745 | 0.02<br>0164 | Up       |
| VSNL1  | 139.89<br>07716 | 37.98796515 | 241.7935781 | 6.3650<br>04738 | 2.670161<br>588      | 1.18<br>E-08 | 7.79<br>E-07 | Up       |
| VSTM2L | 82.373<br>33426 | 54.38521585 | 110.3614527 | 2.0292<br>54659 | 1.020949<br>926      | 0.03<br>7237 | 0.18<br>6751 | Up       |
| VTCN1  | 10.544<br>39531 | 2.350841405 | 18.73794921 | 7.9707<br>41529 | 2.994713<br>946      | 0.01<br>7451 | 0.11<br>0391 | Up       |
| VWA7   | 167.98<br>10736 | 39.30238173 | 296.6597654 | 7.5481<br>37094 | 2.916120<br>626      | 1.21<br>E-10 | 1.26<br>E-08 | Up       |
| VWC2   | 8.7697<br>83332 | 0.832164064 | 16.7074026  | 20.077<br>0537  | 4.327475<br>665      | 0.00<br>4224 | 0.03<br>9084 | Up       |
| WBP1   | 1847.1<br>003   | 958.9625503 | 2735.23805  | 2.8522<br>88705 | 1.512120<br>017      | 1.40<br>E-05 | 0.00<br>0392 | Up       |
| WBP5   | 115.90<br>85887 | 191.730723  | 40.08645436 | 0.2090<br>76843 | -<br>2.257894<br>811 | 6.49<br>E-06 | 0.00<br>0207 | Dow<br>n |
| WDR6   | 3853.4<br>59097 | 2397.361547 | 5309.556647 | 2.2147<br>50067 | 1.147143<br>901      | 0.00<br>0817 | 0.01<br>1314 | Up       |
| WDR72  | 73.534          | 35.00287491 | 112.065579  | 3.2016          | 1.678797             | 0.01         | 0.10         | Up       |

|         |                 |             |             |                 |                      |              |              |      |
|---------|-----------------|-------------|-------------|-----------------|----------------------|--------------|--------------|------|
|         | 22694           |             |             | 10703           | 895                  | 6088         | 3979         |      |
| WDR90   | 870.69<br>48103 | 533.5529778 | 1207.836643 | 2.2637<br>61413 | 1.178721<br>915      | 0.00<br>11   | 0.01<br>4257 | Up   |
| WFDC1   | 1680.3<br>66562 | 2872.062324 | 488.6707999 | 0.1701<br>46308 | -<br>2.555152<br>251 | 0.03<br>2379 | 0.16<br>988  | Down |
| WFDC18  | 75.109<br>20866 | 11.10490439 | 139.1135129 | 12.527<br>21392 | 3.646993<br>687      | 0.02<br>3343 | 0.13<br>5667 | Up   |
| WFDC2   | 349.74<br>54089 | 29.08175115 | 670.4090667 | 23.052<br>56871 | 4.526855<br>612      | 6.49<br>E-24 | 6.93<br>E-21 | Up   |
| WFIKKN2 | 107.20<br>4295  | 205.0159635 | 9.392626443 | 0.0458<br>14122 | -<br>4.448063<br>806 | 0.00<br>1412 | 0.01<br>7282 | Down |
| WIPF1   | 1632.3<br>05735 | 2352.160696 | 912.450774  | 0.3879<br>20254 | -<br>1.366167<br>992 | 0.01<br>0007 | 0.07<br>382  | Down |
| WIPF3   | 815.68<br>62251 | 1202.923766 | 428.4486842 | 0.3561<br>72765 | -<br>1.489350<br>89  | 0.02<br>9043 | 0.15<br>7963 | Down |
| WIPI1   | 924.48<br>10362 | 1482.465643 | 366.496429  | 0.2472<br>20858 | -<br>2.016127<br>624 | 0.00<br>4669 | 0.04<br>2302 | Down |
| WISP2   | 1435.3<br>70713 | 2522.96807  | 347.7733551 | 0.1378<br>42947 | -<br>2.858902<br>639 | 0.01<br>3132 | 0.08<br>9863 | Down |
| WISP3   | 77.369<br>75781 | 8.861863177 | 145.8776524 | 16.461<br>28467 | 4.041005<br>026      | 3.77<br>E-08 | 2.13<br>E-06 | Up   |
| WNK2    | 1169.0<br>98752 | 419.1787168 | 1919.018787 | 4.5780<br>44425 | 2.194731<br>463      | 1.45<br>E-09 | 1.24<br>E-07 | Up   |
| WNK4    | 166.04<br>24794 | 81.9769547  | 250.1080041 | 3.0509<br>55053 | 1.609260<br>926      | 0.00<br>0219 | 0.00<br>3961 | Up   |
| WNT10A  | 78.464<br>536   | 25.03599673 | 131.8930753 | 5.2681<br>37582 | 2.397293<br>023      | 8.89<br>E-06 | 0.00<br>027  | Up   |
| WNT2    | 92.579<br>78558 | 124.4561934 | 60.70337773 | 0.4877<br>48951 | -<br>1.035789<br>326 | 0.02<br>7035 | 0.14<br>9896 | Down |
| WNT4    | 639.69<br>51496 | 178.9245643 | 1100.465735 | 6.1504<br>45239 | 2.620690<br>853      | 5.37<br>E-12 | 7.02<br>E-10 | Up   |
| WNT5B   | 191.06<br>93688 | 60.52357962 | 321.6151581 | 5.3138<br>81963 | 2.409766<br>182      | 3.92<br>E-08 | 2.18<br>E-06 | Up   |
| WNT6    | 168.23<br>98966 | 78.97054463 | 257.5092486 | 3.2608<br>2655  | 1.705237<br>703      | 0.00<br>1169 | 0.01<br>491  | Up   |
| WWC1    | 1630.3<br>70315 | 614.392859  | 2646.347772 | 4.3072<br>56722 | 2.106769<br>314      | 3.73<br>E-08 | 2.11<br>E-06 | Up   |

|         |                 |             |             |                 |                      |              |              |          |
|---------|-----------------|-------------|-------------|-----------------|----------------------|--------------|--------------|----------|
| WWC3    | 1642.2<br>8354  | 2203.338034 | 1081.229046 | 0.4907<br>2318  | -<br>1.027018<br>675 | 0.00<br>3277 | 0.03<br>2495 | Dow<br>n |
| XCL2    | 72.654<br>50889 | 34.59002841 | 110.7189894 | 3.2008<br>93276 | 1.678474<br>576      | 0.00<br>1638 | 0.01<br>9189 | Up       |
| XCR1    | 28.709<br>49548 | 14.25230969 | 43.16668126 | 3.0287<br>49879 | 1.598722<br>442      | 0.02<br>3181 | 0.13<br>5145 | Up       |
| XG      | 1898.5<br>88005 | 2905.90611  | 891.2699013 | 0.3067<br>09807 | -<br>1.705053<br>799 | 0.00<br>0551 | 0.00<br>8288 | Dow<br>n |
| XYLT1   | 1035.6<br>73865 | 1826.723795 | 244.6239353 | 0.1339<br>14025 | -<br>2.900621<br>035 | 6.40<br>E-09 | 4.56<br>E-07 | Dow<br>n |
| YBX2    | 188.65<br>59862 | 113.3553629 | 263.9566094 | 2.3285<br>7628  | 1.219448<br>143      | 0.00<br>3965 | 0.03<br>7128 | Up       |
| YDJC    | 58.214<br>56448 | 23.19655813 | 93.23257082 | 4.0192<br>41574 | 2.006923<br>292      | 0.00<br>0477 | 0.00<br>7469 | Up       |
| YPEL1   | 308.27<br>67859 | 152.9750428 | 463.578529  | 3.0304<br>19345 | 1.599517<br>445      | 3.59<br>E-05 | 0.00<br>0889 | Up       |
| YWHAG   | 2040.6<br>86192 | 2922.97139  | 1158.400993 | 0.3963<br>09385 | -<br>1.335300<br>964 | 0.00<br>2774 | 0.02<br>8678 | Dow<br>n |
| YWHAZ   | 331.76<br>74304 | 447.9762651 | 215.5585957 | 0.4811<br>83073 | -<br>1.055342<br>204 | 0.00<br>6326 | 0.05<br>2856 | Dow<br>n |
| ZAP70   | 986.06<br>44674 | 453.9627741 | 1518.166161 | 3.3442<br>52541 | 1.741683<br>797      | 1.39<br>E-06 | 5.43<br>E-05 | Up       |
| ZBBX    | 3.5477<br>83236 | 0           | 7.095566473 | Inf             | Inf                  | 0.04<br>1967 | 0.20<br>1862 | Up       |
| ZBED6CL | 419.40<br>25488 | 235.3617026 | 603.443395  | 2.5638<br>97985 | 1.358338<br>86       | 0.00<br>0381 | 0.00<br>6207 | Up       |
| ZBP1    | 175.26<br>74833 | 95.24804474 | 255.2869218 | 2.6802<br>32676 | 1.422358<br>249      | 0.00<br>0776 | 0.01<br>0883 | Up       |
| ZBTB16  | 1138.2<br>10236 | 1519.155934 | 757.2645379 | 0.4984<br>77161 | -<br>1.004400<br>688 | 0.01<br>8248 | 0.11<br>4195 | Dow<br>n |
| ZBTB20  | 82.983<br>80705 | 118.931921  | 47.03569309 | 0.3954<br>84179 | -<br>1.338308<br>114 | 0.01<br>9829 | 0.12<br>0603 | Dow<br>n |
| ZBTB8B  | 21.030<br>32768 | 8.474586291 | 33.58606907 | 3.9631<br>51464 | 1.986648<br>105      | 0.01<br>8486 | 0.11<br>5215 | Up       |
| ZBTB9   | 260.71<br>4203  | 157.9616065 | 363.4667995 | 2.3009<br>81913 | 1.202249<br>643      | 0.00<br>2441 | 0.02<br>595  | Up       |
| ZCCHC18 | 144.52          | 81.74179966 | 207.3015911 | 2.5360          | 1.342585             | 0.00         | 0.02         | Up       |

|         |                 |             |             |                 |                      |              |              |          |
|---------|-----------------|-------------|-------------|-----------------|----------------------|--------------|--------------|----------|
|         | 16954           |             |             | 5367            | 278                  | 1862         | 1156         |          |
| ZCCHC24 | 1458.5<br>35455 | 2223.359    | 693.7119104 | 0.3120<br>10751 | -<br>1.680332<br>356 | 1.85<br>E-06 | 6.92<br>E-05 | Dow<br>n |
| ZCWPW1  | 202.40<br>90977 | 109.2168038 | 295.6013916 | 2.7065<br>55963 | 1.436458<br>219      | 0.00<br>0455 | 0.00<br>7177 | Up       |
| ZDBF2   | 15.686<br>68895 | 31.10386733 | 0.269510562 | 0.0086<br>64857 | -<br>6.850608<br>349 | 0.00<br>2351 | 0.02<br>5288 | Dow<br>n |
| ZDHHC15 | 206.98<br>00938 | 135.1317789 | 278.8284087 | 2.0633<br>81472 | 1.045010<br>567      | 0.01<br>2057 | 0.08<br>4511 | Up       |
| ZDHHC2  | 1055.9<br>88876 | 1751.148803 | 360.8289492 | 0.2060<br>52706 | -<br>2.278914<br>686 | 0.00<br>4478 | 0.04<br>0873 | Dow<br>n |
| ZEB1    | 1294.5<br>30834 | 1967.193122 | 621.8685473 | 0.3161<br>19724 | -<br>1.661457<br>04  | 0.02<br>0156 | 0.12<br>2017 | Dow<br>n |
| ZEB2    | 166.04<br>08576 | 278.7460629 | 53.33565224 | 0.1913<br>41365 | -<br>2.385779<br>297 | 0.00<br>1108 | 0.01<br>4333 | Dow<br>n |
| ZFP1    | 179.89<br>80595 | 116.5221391 | 243.2739799 | 2.0877<br>91915 | 1.061977<br>93       | 0.01<br>1079 | 0.07<br>9441 | Up       |
| ZFP36   | 3466.4<br>50745 | 5456.927232 | 1475.974259 | 0.2704<br>77174 | -<br>1.886421<br>245 | 0.04<br>3528 | 0.20<br>7089 | Dow<br>n |
| ZFPM2   | 303.96<br>60578 | 519.1194313 | 88.81268428 | 0.1710<br>83336 | -<br>2.547228<br>848 | 0.00<br>0964 | 0.01<br>2886 | Dow<br>n |
| ZFR2    | 73.578<br>29863 | 20.05255763 | 127.1040396 | 6.3385<br>45035 | 2.664151<br>719      | 1.42<br>E-06 | 5.52<br>E-05 | Up       |
| ZFYVE19 | 247.56<br>35139 | 125.1100261 | 370.0170017 | 2.9575<br>32767 | 1.564394<br>153      | 0.00<br>0101 | 0.00<br>2089 | Up       |
| ZHX1    | 1525.0<br>42513 | 2051.125901 | 998.9591243 | 0.4870<br>29647 | -<br>1.037918<br>498 | 0.04<br>3938 | 0.20<br>8547 | Dow<br>n |
| ZHX3    | 1487.9<br>86831 | 2144.561883 | 831.4117801 | 0.3876<br>83744 | -<br>1.367047<br>852 | 9.25<br>E-05 | 0.00<br>1959 | Dow<br>n |
| ZIC2    | 8.9109<br>76047 | 17.82195209 | 0           | 0               | #NAME?               | 6.56<br>E-05 | 0.00<br>148  | Dow<br>n |
| ZMAT1   | 85.761<br>51771 | 47.81742877 | 123.7056066 | 2.5870<br>40119 | 1.371302<br>427      | 0.00<br>5064 | 0.04<br>5046 | Up       |
| ZMAT4   | 13.335<br>23285 | 2.025064875 | 24.64540082 | 12.170<br>17841 | 3.605278<br>413      | 0.00<br>1827 | 0.02<br>0864 | Up       |



|         |                 |             |             |                 |                      |              |              |      |
|---------|-----------------|-------------|-------------|-----------------|----------------------|--------------|--------------|------|
| ZMIZ2   | 2160.8<br>05745 | 1198.890612 | 3122.720879 | 2.6046<br>75397 | 1.381103<br>59       | 7.44<br>E-05 | 0.00<br>1637 | Up   |
| ZMYND10 | 5.0435<br>76382 | 0           | 10.08715276 | Inf             | Inf                  | 0.01<br>0137 | 0.07<br>4478 | Up   |
| ZNF114  | 16.104<br>66106 | 25.71554571 | 6.493776409 | 0.2525<br>23376 | -<br>1.985511<br>153 | 0.03<br>7117 | 0.18<br>6303 | Down |
| ZNF182  | 451.11<br>43357 | 261.0305596 | 641.1981119 | 2.4564<br>10135 | 1.296551<br>46       | 0.00<br>0499 | 0.00<br>7709 | Up   |
| ZNF232  | 11.455<br>24603 | 2.003054751 | 20.90743731 | 10.437<br>77625 | 3.383742<br>476      | 0.00<br>5604 | 0.04<br>8308 | Up   |
| ZNF235  | 538.23<br>98359 | 344.943957  | 731.5357149 | 2.1207<br>37876 | 1.084566<br>315      | 0.00<br>3847 | 0.03<br>6355 | Up   |
| ZNF274  | 315.51<br>51706 | 198.514654  | 432.5156872 | 2.1787<br>59494 | 1.123506<br>951      | 0.00<br>3755 | 0.03<br>5804 | Up   |
| ZNF286A | 703.70<br>42367 | 363.0648069 | 1044.343667 | 2.8764<br>66258 | 1.524297<br>547      | 2.92<br>E-05 | 0.00<br>0744 | Up   |
| ZNF296  | 54.490<br>93198 | 28.74512027 | 80.2367437  | 2.7913<br>17029 | 1.480945<br>99       | 0.00<br>9609 | 0.07<br>1941 | Up   |
| ZNF32   | 431.03<br>80336 | 283.790952  | 578.2851152 | 2.0377<br>15125 | 1.026952<br>375      | 0.00<br>5503 | 0.04<br>7662 | Up   |
| ZNF346  | 265.83<br>73185 | 172.4698687 | 359.2047684 | 2.0827<br>1028  | 1.058462<br>164      | 0.00<br>584  | 0.04<br>9979 | Up   |
| ZNF362  | 957.84<br>65656 | 606.6020442 | 1309.091087 | 2.1580<br>7233  | 1.109743<br>219      | 0.00<br>165  | 0.01<br>9249 | Up   |
| ZNF367  | 198.93<br>9381  | 276.0231531 | 121.8556089 | 0.4414<br>68795 | -<br>1.179616<br>628 | 0.00<br>3567 | 0.03<br>4503 | Down |
| ZNF385D | 231.60<br>82881 | 430.7798536 | 32.43672256 | 0.0752<br>97678 | -<br>3.731250<br>82  | 0.00<br>0927 | 0.01<br>2497 | Down |
| ZNF423  | 510.54<br>23366 | 767.7687626 | 253.3159105 | 0.3299<br>37766 | -<br>1.599734<br>17  | 1.49<br>E-05 | 0.00<br>0413 | Down |
| ZNF446  | 94.469<br>31035 | 62.27187433 | 126.6667464 | 2.0340<br>92401 | 1.024385<br>217      | 0.03<br>2194 | 0.16<br>9402 | Up   |
| ZNF469  | 361.88<br>10748 | 508.5713342 | 215.1908155 | 0.4231<br>28086 | -<br>1.240833<br>643 | 0.04<br>2662 | 0.20<br>4198 | Down |
| ZNF48   | 314.99<br>57936 | 199.8228046 | 430.1687826 | 2.1527<br>51202 | 1.106181<br>594      | 0.00<br>4892 | 0.04<br>3857 | Up   |
| ZNF683  | 85.362<br>05972 | 23.94132166 | 146.7827978 | 6.1309<br>39632 | 2.616108<br>199      | 6.37<br>E-07 | 2.70<br>E-05 | Up   |
| ZNF711  | 282.38          | 181.9673189 | 382.8068828 | 2.1037          | 1.072937             | 0.00         | 0.04         | Up   |

|         |                 |             |             |                 |                      |              |              |      |
|---------|-----------------|-------------|-------------|-----------------|----------------------|--------------|--------------|------|
|         | 71008           |             |             | 12277           | 402                  | 5551         | 7899         |      |
| ZNF750  | 471.96<br>62784 | 110.9605093 | 832.9720476 | 7.5069<br>23437 | 2.908221<br>769      | 3.84<br>E-13 | 6.16<br>E-11 | Up   |
| ZNF821  | 354.79<br>98807 | 205.0816464 | 504.5181149 | 2.4600<br>84184 | 1.298707<br>686      | 0.00<br>0682 | 0.00<br>9779 | Up   |
| ZNF84   | 526.45<br>02212 | 315.6995522 | 737.2008902 | 2.3351<br>34418 | 1.223505<br>599      | 0.00<br>0822 | 0.01<br>137  | Up   |
| ZNF853  | 166.34<br>19891 | 101.0871138 | 231.5968644 | 2.2910<br>62191 | 1.196016<br>621      | 0.00<br>4657 | 0.04<br>2231 | Up   |
| ZNF891  | 12.209<br>7846  | 3.781963513 | 20.63760568 | 5.4568<br>49494 | 2.448068<br>253      | 0.02<br>4906 | 0.14<br>1925 | Up   |
| ZBPB2   | 74.144<br>55097 | 31.88799555 | 116.4011064 | 3.6503<br>11171 | 1.868019<br>452      | 0.00<br>0388 | 0.00<br>6297 | Up   |
| ZSCAN12 | 216.48<br>61836 | 123.8200247 | 309.1523426 | 2.4967<br>87924 | 1.320073<br>285      | 0.00<br>115  | 0.01<br>4733 | Up   |
| ZSCAN23 | 55.252<br>44043 | 24.79096583 | 85.71391502 | 3.4574<br>6574  | 1.789714<br>956      | 0.00<br>1884 | 0.02<br>1376 | Up   |
| ZSWIM4  | 677.79<br>60653 | 425.5423475 | 930.0497831 | 2.1855<br>63408 | 1.128005<br>234      | 0.00<br>1859 | 0.02<br>1138 | Up   |
| ZSWIM5  | 102.92<br>49025 | 63.32076399 | 142.5290411 | 2.2509<br>05266 | 1.170505<br>339      | 0.01<br>3744 | 0.09<br>3175 | Up   |
| ZYX     | 11290.<br>68881 | 16357.57819 | 6223.799427 | 0.3804<br>84162 | -<br>1.394091<br>694 | 0.04<br>7858 | 0.22<br>2045 | Down |

**Table S7**

| id     | description                                      | Dbxref                     |
|--------|--------------------------------------------------|----------------------------|
| ACOX3  | acyl-CoA oxidase 3, pristanoyl                   | GeneID:510065              |
| ACSBG1 | acyl-CoA synthetase bubblegum family member 1    | BGD:BT30385, GeneID:515577 |
| ACSF2  | acyl-CoA synthetase family member 2              | BGD:BT26369, GeneID:768237 |
| ACSL1  | acyl-CoA synthetase long-chain family member 1   | GeneID:537161              |
| ACSL4  |                                                  | BGD:BT26375, GeneID:536628 |
| ACSM1  | acyl-CoA synthetase medium-chain family member 1 | BGD:BT10990, GeneID:282576 |
| ACSM3  |                                                  | BGD:BT30485, GeneID:533798 |
| ADIPOQ |                                                  | BGD:BT11980, GeneID:282865 |
| AGMO   | alkylglycerol monooxygenase                      | BGD:BT25389, GeneID:613658 |
| ALDH2  | aldehyde dehydrogenase 2 family (mitochondrial)  | BGD:BT28617, GeneID:508629 |

|          |                                                                            |                            |
|----------|----------------------------------------------------------------------------|----------------------------|
| APOA1    | apolipoprotein A-I                                                         | BGD:BT22521, GeneID:281631 |
| C1QTNF2  |                                                                            | BGD:BT16754, GeneID:539842 |
| C3       | complement component 3                                                     | BGD:BT10361, GeneID:280677 |
| CAV1     | caveolin 1, caveolae protein, 22kDa                                        | BGD:BT10178, GeneID:281040 |
| CD36     | CD36 molecule (thrombospondin receptor)                                    | GeneID:518526              |
| CPT1B    | carnitine palmitoyltransferase 1B (muscle)                                 | BGD:BT10800, GeneID:509459 |
| CROT     | carnitine O-octanoyltransferase                                            | GeneID:281092              |
| DGAT2    | diacylglycerol O-acyltransferase 2                                         | BGD:BT10217, GeneID:404129 |
| ECHDC2   | enoyl CoA hydratase domain containing 2                                    | BGD:BT17041, GeneID:513795 |
| ELOVL5   | ELOVL fatty acid elongase 5                                                | BGD:BT22270, GeneID:617293 |
| ELOVL6   | ELOVL fatty acid elongase 6                                                | BGD:BT17431, GeneID:533333 |
| FA2H     | fatty acid 2-hydroxylase                                                   | BGD:BT15059, GeneID:516891 |
| FABP4    | fatty acid binding protein 4, adipocyte                                    | BGD:BT10868, GeneID:281759 |
| FADS1    |                                                                            | BGD:BT12244, GeneID:533107 |
| FAM132B  |                                                                            | GeneID:101905782           |
| FASN     | fatty acid synthase                                                        | GeneID:281152              |
| GPAM     | glycerol-3-phosphate acyltransferase, mitochondrial                        | BGD:BT10533, GeneID:497202 |
| INSIG1   | insulin induced gene 1                                                     | BGD:BT10003, GeneID:511899 |
| LIPE     | lipase, hormone-sensitive                                                  | BGD:BT10797, GeneID:286879 |
| LONP2    | lon peptidase 2, peroxisomal                                               | BGD:BT16284, GeneID:541085 |
| LPIN1    | lipin 1                                                                    | GeneID:537224              |
| LPL      | lipoprotein lipase                                                         | BGD:BT11268, GeneID:280843 |
| MECR     | mitochondrial trans-2-enoyl-CoA reductase                                  | BGD:BT28760, GeneID:353301 |
| MID1IP1  | MID1 interacting protein 1 (gastrulation specific G12 homolog (zebrafish)) | BGD:BT26918, GeneID:615572 |
| PDK3     | pyruvate dehydrogenase kinase, isozyme 3                                   | BGD:BT18648, GeneID:510841 |
| PID1     | phosphotyrosine interaction domain containing 1                            | BGD:BT29169, GeneID:510773 |
| PLA2G15  | phospholipase A2, group XV                                                 | BGD:BT10554, GeneID:282271 |
| PPARGC1A | peroxisome proliferator-activated receptor gamma, coactivator 1 alpha      | BGD:BT11222, GeneID:338446 |
| PTGDS    | prostaglandin D2 synthase 21kDa (brain)                                    | BGD:BT10325, GeneID:286858 |
| QKI      | QKI, KH domain containing, RNA binding                                     | GeneID:493722              |
| SCD      | stearoyl-CoA desaturase (delta-9-desaturase)                               | GeneID:280924              |
| SLC27A1  | solute carrier family 27 (fatty acid transporter), member 1                | BGD:BT10588, GeneID:513787 |
| SLC27A5  | solute carrier family 27 (fatty acid transporter), member 5                | BGD:BT27852, GeneID:533016 |
| SLC27A6  | solute carrier family 27 (fatty acid transporter), member 6                | BGD:BT26280, GeneID:537062 |
| TECR     | trans-2,3-enoyl-CoA reductase                                              | BGD:BT18971, GeneID:614105 |
| THEM4    | thioesterase superfamily member 4                                          | GeneID:787270              |

|        |                              |               |
|--------|------------------------------|---------------|
| TNXB   |                              | GeneID:282654 |
| TWIST1 | twist homolog 1 (Drosophila) | GeneID:782170 |

**Table S8**

| miRNA_id          | type  | gene     | type |
|-------------------|-------|----------|------|
| AC_000168.1_13098 | miRNA | DGAT2    | gene |
| AC_000178.1_22528 | miRNA | C3       | gene |
| AC_000178.1_22528 | miRNA | TNXB     | gene |
| bta-miR-1247-3p   | miRNA | FAM132B  | gene |
| bta-miR-1247-3p   | miRNA | PLA2G15  | gene |
| bta-miR-133b      | miRNA | LIPE     | gene |
| bta-miR-1388-5p   | miRNA | ACSBG1   | gene |
| bta-miR-2474      | miRNA | PPARGC1A | gene |
| bta-miR-365-5p    | miRNA | TECR     | gene |
| bta-miR-378       | miRNA | FADS1    | gene |
| bta-miR-6518      | miRNA | AGMO     | gene |
| bta-miR-6518      | miRNA | GPAM     | gene |
| bta-miR-218       | miRNA | ELOVL5   | gene |
| bta-miR-7860      | miRNA | PTGDS    | gene |
| SCD               | gene  | FASN     | gene |
| LPIN1             | gene  | DGAT2    | gene |
| CPT1B             | gene  | ACSL1    | gene |
| FASN              | gene  | ACSL1    | gene |
| CPT1B             | gene  | ACSL4    | gene |
| CPT1B             | gene  | ACSBG1   | gene |
| LPL               | gene  | LPIN1    | gene |
| FASN              | gene  | ACSL4    | gene |
| FASN              | gene  | ACSBG1   | gene |
| LPL               | gene  | APOA1    | gene |
| LPL               | gene  | ACSL1    | gene |
| LPL               | gene  | ADIPOQ   | gene |
| ACSL4             | gene  | ACSL1    | gene |
| ACSL1             | gene  | ACOX3    | gene |
| ACSL4             | gene  | ACSBG1   | gene |
| ACSL1             | gene  | ACSBG1   | gene |
| MECR              | gene  | ACOX3    | gene |
| LPL               | gene  | ACSL4    | gene |
| LPL               | gene  | ACSBG1   | gene |
| ACSL4             | gene  | ACOX3    | gene |
| ACSBG1            | gene  | ACOX3    | gene |
| LPL               | gene  | LIPE     | gene |
| ECHDC2            | gene  | ACOX3    | gene |

|          |      |        |      |
|----------|------|--------|------|
| FABP4    | gene | ADIPOQ | gene |
| LPL      | gene | FASN   | gene |
| ACSF2    | gene | ACOX3  | gene |
| FASN     | gene | DGAT2  | gene |
| ALDH2    | gene | ACSM1  | gene |
| SCD      | gene | ACSL1  | gene |
| PPARGC1A | gene | LPL    | gene |
| ALDH2    | gene | ACSM3  | gene |
| LPL      | gene | FABP4  | gene |
| SCD      | gene | ELOVL6 | gene |
| SCD      | gene | FADS1  | gene |
| SLC27A1  | gene | DGAT2  | gene |
| ECHDC2   | gene | ACSF2  | gene |
| FA2H     | gene | AGMO   | gene |
| FASN     | gene | ADIPOQ | gene |
| ALDH2    | gene | ACOX3  | gene |
| SLC27A6  | gene | LPIN1  | gene |
| CD36     | gene | CAV1   | gene |
| SLC27A1  | gene | FASN   | gene |
| PPARGC1A | gene | CPT1B  | gene |
| LIPE     | gene | ADIPOQ | gene |
| LIPE     | gene | FABP4  | gene |
| PDK3     | gene | ECHDC2 | gene |
| ECHDC2   | gene | ACSM3  | gene |
| ECHDC2   | gene | ACSM1  | gene |
| SCD      | gene | ELOVL5 | gene |
| LIPE     | gene | FASN   | gene |
| ECHDC2   | gene | ALDH2  | gene |
| SLC27A6  | gene | ACSL1  | gene |
| LPL      | gene | ACOX3  | gene |
| SLC27A1  | gene | ACSL1  | gene |
| SCD      | gene | LPL    | gene |
| PLA2G15  | gene | DGAT2  | gene |
| FASN     | gene | FABP4  | gene |
| ECHDC2   | gene | ACSL4  | gene |
| FASN     | gene | ELOVL6 | gene |
| SCD      | gene | DGAT2  | gene |
| MECR     | gene | ALDH2  | gene |
| ACSM1    | gene | ACOX3  | gene |
| FASN     | gene | CAV1   | gene |
| ACSM3    | gene | ACOX3  | gene |
| LPL      | gene | CPT1B  | gene |
| FASN     | gene | ACSF2  | gene |

|          |      |        |      |
|----------|------|--------|------|
| SCD      | gene | ACSL4  | gene |
| PPARGC1A | gene | APOA1  | gene |
| ALDH2    | gene | ACSF2  | gene |
| SCD      | gene | FABP4  | gene |
| PPARGC1A | gene | FABP4  | gene |
| LPIN1    | gene | ACSL1  | gene |
| ECHDC2   | gene | ACSL1  | gene |
| ECHDC2   | gene | ACSBG1 | gene |
| LPL      | gene | CD36   | gene |
| SCD      | gene | FA2H   | gene |
| SCD      | gene | LIPE   | gene |
| FADS1    | gene | ELOVL5 | gene |
| LIPE     | gene | ACSF2  | gene |
| DGAT2    | gene | ACSL1  | gene |
| SCD      | gene | ADIPOQ | gene |
| MECR     | gene | ECHDC2 | gene |
| GPAM     | gene | FASN   | gene |
| APOA1    | gene | ACOX3  | gene |
| LIPE     | gene | DGAT2  | gene |
| PPARGC1A | gene | ADIPOQ | gene |
| TECR     | gene | ELOVL5 | gene |
| PPARGC1A | gene | FASN   | gene |
| SLC27A5  | gene | FASN   | gene |
| LIPE     | gene | ACSL1  | gene |
| SLC27A1  | gene | LPL    | gene |
| LPL      | gene | DGAT2  | gene |
| SLC27A5  | gene | DGAT2  | gene |
| CD36     | gene | ADIPOQ | gene |
| LONP2    | gene | ACOX3  | gene |
| SLC27A6  | gene | DGAT2  | gene |
| CPT1B    | gene | ACOX3  | gene |
| GPAM     | gene | DGAT2  | gene |
| FADS1    | gene | ACSM3  | gene |
| TECR     | gene | ELOVL6 | gene |
| PPARGC1A | gene | ACOX3  | gene |
| APOA1    | gene | CPT1B  | gene |
| INSIG1   | gene | FASN   | gene |
| SCD      | gene | INSIG1 | gene |
| SCD      | gene | ACSBG1 | gene |
| SLC27A1  | gene | LIPE   | gene |
| LONP2    | gene | CROT   | gene |
| ALDH2    | gene | ACSL4  | gene |
| ALDH2    | gene | ACSL1  | gene |

|          |      |          |      |
|----------|------|----------|------|
| FASN     | gene | CD36     | gene |
| SLC27A1  | gene | CD36     | gene |
| FADS1    | gene | ACSL1    | gene |
| APOA1    | gene | CD36     | gene |
| FABP4    | gene | ACSL1    | gene |
| DGAT2    | gene | ADIPOQ   | gene |
| SCD      | gene | PPARGC1A | gene |
| ALDH2    | gene | ACSBG1   | gene |
| SLC27A6  | gene | FASN     | gene |
| GPAM     | gene | CPT1B    | gene |
| LIPE     | gene | CD36     | gene |
| GPAM     | gene | ELOVL6   | gene |
| SLC27A5  | gene | ACSL4    | gene |
| PPARGC1A | gene | ACSL1    | gene |
| FABP4    | gene | DGAT2    | gene |
| PLA2G15  | gene | LPIN1    | gene |
| APOA1    | gene | C3       | gene |
| ECHDC2   | gene | CPT1B    | gene |
| TECR     | gene | SCD      | gene |
| APOA1    | gene | FASN     | gene |
| APOA1    | gene | ADIPOQ   | gene |
| SLC27A5  | gene | ACSL1    | gene |
| TECR     | gene | FA2H     | gene |
| APOA1    | gene | FABP4    | gene |
| FABP4    | gene | CD36     | gene |
| LPIN1    | gene | FABP4    | gene |
| INSIG1   | gene | FADS1    | gene |
| ELOVL5   | gene | ACSM3    | gene |
| ELOVL6   | gene | DGAT2    | gene |
| LIPE     | gene | CPT1B    | gene |
| FADS1    | gene | ACSL4    | gene |
| SLC27A1  | gene | ADIPOQ   | gene |
| SCD      | gene | CD36     | gene |
| PPARGC1A | gene | LIPE     | gene |
| FABP4    | gene | ACOX3    | gene |
| PPARGC1A | gene | LPIN1    | gene |
| ELOVL6   | gene | ACSL1    | gene |
| DGAT2    | gene | ACSL4    | gene |
| ACSM3    | gene | ACSL4    | gene |
| ACSM3    | gene | ACSBG1   | gene |
| FASN     | gene | ACOX3    | gene |
| SLC27A1  | gene | ACSL4    | gene |
| LIPE     | gene | ACOX3    | gene |

|         |      |        |      |
|---------|------|--------|------|
| APOA1   | gene | CAV1   | gene |
| FASN    | gene | CPT1B  | gene |
| SCD     | gene | GPAM   | gene |
| GPAM    | gene | ACSL1  | gene |
| MID1IP1 | gene | INSIG1 | gene |
| LPIN1   | gene | FASN   | gene |
| LIPE    | gene | ACSL4  | gene |
| LPIN1   | gene | INSIG1 | gene |
| CAV1    | gene | ADIPOQ | gene |
| SLC27A1 | gene | SCD    | gene |
| FABP4   | gene | CPT1B  | gene |
| FASN    | gene | FADS1  | gene |
| FADS1   | gene | ACSBG1 | gene |
| PDK3    | gene | ALDH2  | gene |
| SCD     | gene | ACOX3  | gene |
| LIPE    | gene | ACSBG1 | gene |
| FA2H    | gene | ACSL1  | gene |
| SLC27A1 | gene | ACSF2  | gene |
| APOA1   | gene | LIPE   | gene |
| TNXB    | gene | ACSL1  | gene |
| SLC27A6 | gene | ACSF2  | gene |
| SLC27A5 | gene | ACSF2  | gene |
| SCD     | gene | CPT1B  | gene |
| FADS1   | gene | ELOVL6 | gene |
| SLC27A1 | gene | FABP4  | gene |
| MECR    | gene | ACSF2  | gene |
| SCD     | gene | LPIN1  | gene |
| ELOVL6  | gene | ELOVL5 | gene |
| GPAM    | gene | ACSL4  | gene |
| CPT1B   | gene | ACSM3  | gene |
| CPT1B   | gene | ACSM1  | gene |
| LIPE    | gene | CAV1   | gene |
| CROT    | gene | ACOX3  | gene |
| ELOVL5  | gene | DGAT2  | gene |
| LPL     | gene | CAV1   | gene |
| DGAT2   | gene | ACSM3  | gene |
| ACSL4   | gene | ACSF2  | gene |
| TNXB    | gene | ACSL4  | gene |
| FASN    | gene | ELOVL5 | gene |
| DGAT2   | gene | CD36   | gene |
| SCD     | gene | APOA1  | gene |
| PLA2G15 | gene | ACSL4  | gene |
| PLA2G15 | gene | ACSL1  | gene |



|          |      |          |      |
|----------|------|----------|------|
| PLA2G15  | gene | ACSBG1   | gene |
| FADS1    | gene | ACSM1    | gene |
| PLA2G15  | gene | ACSM1    | gene |
| FA2H     | gene | ACSL4    | gene |
| FA2H     | gene | ACSBG1   | gene |
| TNXB     | gene | ACSBG1   | gene |
| PPARGC1A | gene | ECHDC2   | gene |
| MID1IP1  | gene | FASN     | gene |
| PPARGC1A | gene | DGAT2    | gene |
| LPIN1    | gene | GPAM     | gene |
| SLC27A1  | gene | ACSBG1   | gene |
| DGAT2    | gene | CPT1B    | gene |
| FADS1    | gene | ACSF2    | gene |
| SLC27A6  | gene | ACSL4    | gene |
| CD36     | gene | ACSL1    | gene |
| SLC27A1  | gene | PPARGC1A | gene |
| PLA2G15  | gene | ACSM3    | gene |
| LPL      | gene | INSIG1   | gene |
| APOA1    | gene | ECHDC2   | gene |
| SLC27A1  | gene | GPAM     | gene |
| INSIG1   | gene | ACSL1    | gene |
| PPARGC1A | gene | ELOVL6   | gene |
| LPL      | gene | FADS1    | gene |
| SLC27A1  | gene | CAV1     | gene |
| SLC27A1  | gene | ACOX3    | gene |
| LIPE     | gene | GPAM     | gene |
| ACSL1    | gene | ACSF2    | gene |
| ACSF2    | gene | ACSBG1   | gene |
| FABP4    | gene | ECHDC2   | gene |
| FABP4    | gene | ELOVL6   | gene |
| PPARGC1A | gene | CD36     | gene |
| DGAT2    | gene | ACOX3    | gene |
| SLC27A6  | gene | FABP4    | gene |
| ADIPOQ   | gene | ACSL1    | gene |
| SLC27A1  | gene | CPT1B    | gene |
| LPIN1    | gene | ELOVL6   | gene |
| GPAM     | gene | FABP4    | gene |
| LPIN1    | gene | FADS1    | gene |
| INSIG1   | gene | DGAT2    | gene |
| FADS1    | gene | DGAT2    | gene |
| PLA2G15  | gene | MECR     | gene |
| INSIG1   | gene | ELOVL6   | gene |
| GPAM     | gene | FADS1    | gene |

|          |      |         |      |
|----------|------|---------|------|
| PLA2G15  | gene | LPL     | gene |
| GPAM     | gene | ADIPOQ  | gene |
| ELOVL6   | gene | ACOX3   | gene |
| ACSM1    | gene | ACSL1   | gene |
| MID1IP1  | gene | ELOVL6  | gene |
| ACSM3    | gene | ACSF2   | gene |
| LONP2    | gene | ACSL4   | gene |
| INSIG1   | gene | FABP4   | gene |
| CPT1B    | gene | ADIPOQ  | gene |
| GPAM     | gene | ACOX3   | gene |
| CROT     | gene | CPT1B   | gene |
| LPL      | gene | GPAM    | gene |
| LONP2    | gene | ACSF2   | gene |
| PDK3     | gene | DGAT2   | gene |
| PLA2G15  | gene | APOA1   | gene |
| ADIPOQ   | gene | ACOX3   | gene |
| TNXB     | gene | ACSM3   | gene |
| ACSM1    | gene | ACSF2   | gene |
| SLC27A5  | gene | ACOX3   | gene |
| SLC27A6  | gene | ACSBG1  | gene |
| SLC27A5  | gene | ACSBG1  | gene |
| FADS1    | gene | AGMO    | gene |
| LIPE     | gene | ECHDC2  | gene |
| ELOVL6   | gene | ADIPOQ  | gene |
| PDK3     | gene | LIPE    | gene |
| GPAM     | gene | ECHDC2  | gene |
| SLC27A1  | gene | ELOVL5  | gene |
| TECR     | gene | MECR    | gene |
| PDK3     | gene | CPT1B   | gene |
| SLC27A6  | gene | SCD     | gene |
| LONP2    | gene | ACSM3   | gene |
| LONP2    | gene | ACSM1   | gene |
| SLC27A6  | gene | LPL     | gene |
| LPL      | gene | C3      | gene |
| ELOVL5   | gene | ACSL1   | gene |
| MECR     | gene | FASN    | gene |
| PPARGC1A | gene | FADS1   | gene |
| ACSM3    | gene | ACSL1   | gene |
| FA2H     | gene | ELOVL6  | gene |
| SLC27A5  | gene | LPIN1   | gene |
| PDK3     | gene | ACSF2   | gene |
| SLC27A5  | gene | SLC27A1 | gene |
| APOA1    | gene | DGAT2   | gene |

|          |      |         |      |
|----------|------|---------|------|
| SLC27A1  | gene | LPIN1   | gene |
| ELOVL6   | gene | ACSM3   | gene |
| SCD      | gene | ACSF2   | gene |
| PDK3     | gene | ACSL4   | gene |
| PDK3     | gene | ACSL1   | gene |
| SLC27A6  | gene | INSIG1  | gene |
| PDK3     | gene | ACSM3   | gene |
| PDK3     | gene | ACSM1   | gene |
| PDK3     | gene | ACSBG1  | gene |
| C3       | gene | ADIPOQ  | gene |
| FADS1    | gene | FA2H    | gene |
| LPL      | gene | ELOVL6  | gene |
| SLC27A5  | gene | SCD     | gene |
| SLC27A5  | gene | LPL     | gene |
| SLC27A6  | gene | ACSM3   | gene |
| MECR     | gene | ACSM3   | gene |
| MECR     | gene | ACSM1   | gene |
| PDK3     | gene | FA2H    | gene |
| LONP2    | gene | ECHDC2  | gene |
| FABP4    | gene | ACSL4   | gene |
| SLC27A6  | gene | ELOVL5  | gene |
| SLC27A6  | gene | ACSM1   | gene |
| TECR     | gene | ACSL4   | gene |
| TECR     | gene | ACSL1   | gene |
| TECR     | gene | ACSBG1  | gene |
| LIPE     | gene | ALDH2   | gene |
| LPIN1    | gene | CD36    | gene |
| INSIG1   | gene | CD36    | gene |
| CPT1B    | gene | ALDH2   | gene |
| SLC27A5  | gene | FABP4   | gene |
| SLC27A5  | gene | ELOVL5  | gene |
| PTGDS    | gene | FADS1   | gene |
| PPARGC1A | gene | INSIG1  | gene |
| MID1IP1  | gene | DGAT2   | gene |
| GPAM     | gene | CD36    | gene |
| SCD      | gene | CAV1    | gene |
| PDK3     | gene | LONP2   | gene |
| LPIN1    | gene | ELOVL5  | gene |
| FA2H     | gene | CPT1B   | gene |
| LIPE     | gene | ACSM1   | gene |
| SLC27A6  | gene | SLC27A1 | gene |
| SCD      | gene | ACSM3   | gene |
| FASN     | gene | ACSM3   | gene |

|        |      |         |      |
|--------|------|---------|------|
| FABP4  | gene | ELOVL5  | gene |
| LPL    | gene | ELOVL5  | gene |
| FASN   | gene | CROT    | gene |
| SCD    | gene | MID1IP1 | gene |
| ELOVL6 | gene | ACSL4   | gene |
| ELOVL5 | gene | ACSL4   | gene |
| LPIN1  | gene | ADIPOQ  | gene |
| GPAM   | gene | ACSF2   | gene |
| ACSM1  | gene | ACSL4   | gene |
| ACSM1  | gene | ACSBG1  | gene |
| TNXB   | gene | CAV1    | gene |
| PTGDS  | gene | APOA1   | gene |
| FASN   | gene | ACSM1   | gene |

**Table S9**

| Name                         | Mature sequence            | Mature sequence          | sense (5'-3')             | antisense (5'-3')             |
|------------------------------|----------------------------|--------------------------|---------------------------|-------------------------------|
| >bta-miR-218<br>MIMAT0003798 | uugugcuugau<br>cuaaccaugug | SiRNA<br>-<br>ELOV<br>L5 | GCAGUAGUGUCGAAU<br>CAUATT | UAUGUCUA<br>CAACACUUU<br>GCTT |

**Table S10**

| Name                                                | Sequence                                                                                                                                                                                                                                                                                                                                                                                                                                                                                                                                               |
|-----------------------------------------------------|--------------------------------------------------------------------------------------------------------------------------------------------------------------------------------------------------------------------------------------------------------------------------------------------------------------------------------------------------------------------------------------------------------------------------------------------------------------------------------------------------------------------------------------------------------|
| circRNA_015<br>92 Chr11:505<br>26026_50533<br>893_+ | tGCAACAGAATGGAATTCGGCATTGCTCTTATACAACTTCC<br>AGGAAGCATCTCTATGTTGATAGAAATACGAAGATTATTT<br>GCCAGGGTTTCACTGGTAAGCAGGGCACCTTTCATAGCC<br>AGCAGGCACTGGAATATGGCACCAAAGTGTGGAGGAA<br>CCACTCCAGGGAAAGGAGGCAAGACGCACCTGGGCTTA<br>CCAGTCTTTAACTGTGAAGGAGGCCAAAGAACAGACT<br>GGGGCGACAGCATCTGTCATTTATGTCCCTcctccctttgctgc<br>tgctgccattgATGAAGCTATCGAGGCGGAAGTGTCCCTGGTGC<br>TGTGCATCACCGAAGGTATCCCGCAGCAGGACATGGTGC<br>GGGTCAAGCACAACTGCTGCGACAGGGAAAGACCAGG<br>CTGGTCGGGCCGAAGTCCCTGGAGTCATCAATCCTGGA<br>GAATGCAAATTTGGCATCATGCCTGGCCATATTCACAAGA<br>AAGGAAGAGTCG |
